# Supplementary material for: Culture of Cancer Cells at Physiological Oxygen Levels Affects Gene Expression in a Cell-Type Specific Manner
Source: Preprints.org preprint supplement (doi:10.20944/preprints202208.0497.v1), 2022-08-29
Supplement: Supplementary file 1 [file supplementary]

## Sheet: DEG LNCaP 18% O2 vs 5% O2
Gene ID	log2FoldChange	Fold change	pvalue	padj	gene_name	gene_chr	gene_start	gene_end	gene_strand	gene_length	gene_biotype	gene_description	tf_family	Raw readcount 18% O2	Raw readout 5% O2	FPKM 18% O2	FPKM 5% O2
ENSG00000078725	9.35153	653.266	2.65311e-13	6.77446e-09	BRINP1	9	119153458	119369467	-	3905	protein_coding	BMP/retinoic acid inducible neural specific 1 [Source:HGNC Symbol;Acc:HGNC:2687]	-	83	0	0.895519	0
ENSG00000274276	3.26969	9.64438	2.22983e-11	2.84682e-07	CBSL	21	6444869	6468040	-	4004	protein_coding	cystathionine-beta-synthase like [Source:HGNC Symbol;Acc:HGNC:51829]	-	441	44	4.64047	0.500088
ENSG00000275895	3.3038	9.87512	8.75128e-11	6.44291e-07	U2AF1L5	21	6484623	6499261	-	11119	protein_coding	U2 small nuclear RNA auxiliary factor 1 like 5 [Source:HGNC Symbol;Acc:HGNC:51830]	-	298	29	1.12919	0.118692
ENSG00000205609	-3.13245	8.76923	1.00931e-10	6.44291e-07	EIF3CL	16	28379579	28403879	-	3091	protein_coding	eukaryotic translation initiation factor 3 subunit C like [Source:HGNC Symbol;Acc:HGNC:26347]	-	48	407	0.654275	5.99216
ENSG00000187243	-3.2375	9.43159	1.58821e-09	7.08084e-06	MAGED4B	X	52061827	52069248	-	4947	protein_coding	MAGE family member D4B [Source:HGNC Symbol;Acc:HGNC:22880]	-	20	183	0.170336	1.68344
ENSG00000269405	-8.5536	375.741	1.6816e-09	7.08084e-06	NXF2	X	102247161	102326719	+	2343	protein_coding	nuclear RNA export factor 2 [Source:HGNC Symbol;Acc:HGNC:8072]	-	0	46	0	0.893456
ENSG00000171124	-4.1052	17.2103	1.94117e-09	7.08084e-06	FUT3	19	5842888	5851474	-	3109	protein_coding	fucosyltransferase 3 (Lewis blood group) [Source:HGNC Symbol;Acc:HGNC:4014]	-	5	85	0.067759	1.24419
ENSG00000128965	-2.80763	7.00132	2.51338e-09	8.02209e-06	CHAC1	15	40952962	40956519	+	2058	protein_coding	ChaC glutathione specific gamma-glutamylcyclotransferase 1 [Source:HGNC Symbol;Acc:HGNC:28680]	-	68	460	1.39214	10.1719
ENSG00000248498	-3.18369	9.08627	6.7747e-09	1.92206e-05	ASNSP1	8	46579213	46638886	-	2835	transcribed_unprocessed_pseudogene	asparagine synthetase pseudogene 1 [Source:HGNC Symbol;Acc:HGNC:754]	-	17	150	0.252647	2.40783
ENSG00000125968	2.50517	5.67715	1.04745e-08	2.67457e-05	ID1	20	31605283	31606515	+	1233	protein_coding	inhibitor of DNA binding 1, HLH protein [Source:HGNC Symbol;Acc:HGNC:5360]	bHLH	3208	545	109.62	20.1151
ENSG00000047457	-3.27803	9.70029	3.23193e-08	7.50218e-05	CP	3	149162410	149222055	-	7296	protein_coding	ceruloplasmin [Source:HGNC Symbol;Acc:HGNC:2295]	-	11	104	0.0635222	0.648689
ENSG00000183054	3.72307	13.2056	5.50009e-08	0.000117033	RGPD6	2	110513812	110577185	-	13309	protein_coding	RANBP2-like and GRIP domain containing 6 [Source:HGNC Symbol;Acc:HGNC:32419]	-	70	5	0.2216	0.0170967
ENSG00000184564	-2.55472	5.87554	7.43082e-08	0.000145953	SLITRK6	13	85792787	85806683	-	4474	protein_coding	SLIT and NTRK like family member 6 [Source:HGNC Symbol;Acc:HGNC:23503]	-	56	318	0.527363	3.23459
ENSG00000155622	-5.24097	37.8172	9.79951e-08	0.000178729	XAGE2	X	52369030	52375680	+	618	protein_coding	X antigen family member 2 [Source:HGNC Symbol;Acc:HGNC:4112]	-	1	41	0.0681757	3.01914
ENSG00000185633	-3.25616	9.55434	1.64271e-07	0.000266775	NDUFA4L2	12	57234903	57240715	-	2806	protein_coding	NDUFA4, mitochondrial complex associated like 2 [Source:HGNC Symbol;Acc:HGNC:29836]	-	9	84	0.135137	1.36232
ENSG00000180611	8.06713	268.193	1.67165e-07	0.000266775	MB21D2	3	192796815	192918161	-	3368	protein_coding	Mab-21 domain containing 2 [Source:HGNC Symbol;Acc:HGNC:30438]	-	34	0	0.425329	0
ENSG00000169429	-2.91972	7.567	3.41007e-07	0.000512192	CXCL8	4	73740506	73743716	+	2274	protein_coding	C-X-C motif chemokine ligand 8 [Source:HGNC Symbol;Acc:HGNC:6025]	-	14	103	0.259391	2.06127
ENSG00000168874	3.02011	8.11228	4.5418e-07	0.000644279	ATOH8	2	85751344	85788066	+	6076	protein_coding	atonal bHLH transcription factor 8 [Source:HGNC Symbol;Acc:HGNC:24126]	bHLH	85	10	0.589412	0.074898
ENSG00000149927	-2.42211	5.35955	8.42186e-07	0.00113181	DOC2A	16	30005509	30023270	-	6426	protein_coding	double C2 domain alpha [Source:HGNC Symbol;Acc:HGNC:2985]	-	38	197	0.24915	1.39513
ENSG00000148346	-2.43956	5.42475	1.07612e-06	0.00137388	LCN2	9	128149071	128153455	+	1598	protein_coding	lipocalin 2 [Source:HGNC Symbol;Acc:HGNC:6526]	-	32	168	0.843706	4.78432
ENSG00000103257	-3.05398	8.305	1.15971e-06	0.0014101	SLC7A5	16	87830023	87869488	-	4745	protein_coding	solute carrier family 7 member 5 [Source:HGNC Symbol;Acc:HGNC:11063]	-	9	73	0.0799142	0.700123
ENSG00000152952	-7.78762	220.957	1.61305e-06	0.00187217	PLOD2	3	146069440	146163653	-	7646	protein_coding	procollagen-lysine,2-oxoglutarate 5-dioxygenase 2 [Source:HGNC Symbol;Acc:HGNC:9082]	-	0	27	0	0.1607
ENSG00000099715	3.21966	9.31567	1.8279e-06	0.00194564	PCDH11Y	Y	5000226	5742224	+	11672	protein_coding	protocadherin 11 Y-linked [Source:HGNC Symbol;Acc:HGNC:15813]	-	59	6	0.212973	0.0233934
ENSG00000215861	4.831	28.4626	1.82875e-06	0.00194564	AC245297.1	1	149197992	149321732	-	933	unprocessed_pseudogene	phosphodiesterase 4D interacting protein-like [Source:NCBI gene;Acc:653513]	-	33	1	1.49022	0.048776
ENSG00000188243	-2.03809	4.107	2.34102e-06	0.00239102	COMMD6	13	75525219	75549439	-	2897	protein_coding	COMM domain containing 6 [Source:HGNC Symbol;Acc:HGNC:24015]	-	508	2013	7.38811	31.6215
ENSG00000164418	2.69561	6.47826	2.51028e-06	0.00246529	GRIK2	6	101181257	102070083	+	7585	protein_coding	glutamate ionotropic receptor kainate type subunit 2 [Source:HGNC Symbol;Acc:HGNC:4580]	-	88	13	0.488815	0.0779966
ENSG00000229703	-4.13776	17.6031	2.92973e-06	0.00277066	CR589904.1	1	248691760	248716755	+	923	transcribed_unitary_pseudogene	novel pseudogene	-	2	36	0.0912948	1.77496
ENSG00000117318	2.01905	4.05315	3.17891e-06	0.00285462	ID3	1	23557918	23559794	-	1797	protein_coding	inhibitor of DNA binding 3, HLH protein [Source:HGNC Symbol;Acc:HGNC:5362]	bHLH	1555	370	36.4586	9.37004
ENSG00000174672	-2.07209	4.20496	3.30492e-06	0.00285462	BRSK2	11	1389899	1462689	+	6903	protein_coding	BR serine/threonine kinase 2 [Source:HGNC Symbol;Acc:HGNC:11405]	-	135	548	0.823974	3.61269
ENSG00000184110	2.0455	4.12816	3.3539e-06	0.00285462	EIF3C	16	28688558	28735730	+	6982	protein_coding	eukaryotic translation initiation factor 3 subunit C [Source:HGNC Symbol;Acc:HGNC:3279]	-	852	199	5.14136	1.29706
ENSG00000115263	2.22021	4.65961	4.70195e-06	0.00387289	GCG	2	162142873	162152404	-	2387	protein_coding	glucagon [Source:HGNC Symbol;Acc:HGNC:4191]	-	213	44	3.75963	0.838857
ENSG00000187678	4.69405	25.885	5.24925e-06	0.00418858	SPRY4	5	142310427	142326455	-	6565	protein_coding	sprouty RTK signaling antagonist 4 [Source:HGNC Symbol;Acc:HGNC:15533]	-	30	1	0.192533	0.00693191
ENSG00000149506	-4.05559	16.6285	5.52293e-06	0.00427341	ZP1	11	60867562	60875693	+	2436	protein_coding	zona pellucida glycoprotein 1 [Source:HGNC Symbol;Acc:HGNC:13187]	-	2	34	0.0345916	0.635169
ENSG00000213139	-2.93898	7.66871	6.24382e-06	0.00459914	CRYGS	3	186538441	186546702	-	2151	protein_coding	crystallin gamma S [Source:HGNC Symbol;Acc:HGNC:2417]	-	8	60	0.156699	1.2694
ENSG00000272636	-2.14449	4.42135	6.30415e-06	0.00459914	DOC2B	17	142789	181636	-	6448	protein_coding	double C2 domain beta [Source:HGNC Symbol;Acc:HGNC:2986]	-	55	235	0.359381	1.65856
ENSG00000143320	-4.01267	16.1412	7.62631e-06	0.00536159	CRABP2	1	156699606	156705816	-	1100	protein_coding	cellular retinoic acid binding protein 2 [Source:HGNC Symbol;Acc:HGNC:2339]	-	2	33	0.0766047	1.36524
ENSG00000215630	-2.03385	4.09496	8.15121e-06	0.00536159	GUSBP9	5	71197646	71208130	-	584	unprocessed_pseudogene	glucuronidase, beta pseudogene 9 [Source:HGNC Symbol;Acc:HGNC:42323]	-	88	348	6.34874	27.1178
ENSG00000175197	-1.97801	3.93949	8.17945e-06	0.00536159	DDIT3	12	57516588	57521737	-	1307	protein_coding	DNA damage inducible transcript 3 [Source:HGNC Symbol;Acc:HGNC:2726]	TF_bZIP	152	578	4.89988	20.1252
ENSG00000073605	-2.15462	4.4525	8.18917e-06	0.00536159	GSDMB	17	39904595	39919854	-	5905	protein_coding	gasdermin B [Source:HGNC Symbol;Acc:HGNC:23690]	-	46	198	0.328213	1.52592
ENSG00000233912	-4.69277	25.8622	1.08654e-05	0.00693594	AC026202.2	3	5156905	5187329	-	672	antisense	novel transcript, antisense to ARL8B	-	1	28	0.0626973	1.89617
ENSG00000166888	-2.79537	6.94209	1.15476e-05	0.00719161	STAT6	12	57095408	57132139	-	7298	protein_coding	signal transducer and activator of transcription 6 [Source:HGNC Symbol;Acc:HGNC:11368]	STAT	9	61	0.0519585	0.380377
ENSG00000229057	-7.49365	180.224	1.26863e-05	0.00771268	RPS3AP54	9	6662424	6663792	+	734	processed_pseudogene	ribosomal protein S3a pseudogene 54 [Source:HGNC Symbol;Acc:HGNC:49750]	-	0	22	0	1.364
ENSG00000246477	-3.33308	10.0776	1.38101e-05	0.00820066	AF131216.1	8	11315859	11325429	-	5856	antisense	novel transcript, antisense to MTMR9	-	4	40	0.0287791	0.310847
ENSG00000166432	-2.00812	4.02258	1.61181e-05	0.00935362	ZMAT1	X	101882288	101932031	-	7514	protein_coding	zinc finger matrin-type 1 [Source:HGNC Symbol;Acc:HGNC:29377]	-	70	272	0.392505	1.64735
ENSG00000124107	-1.9052	3.7456	1.65907e-05	0.00941392	SLPI	20	45252239	45254564	-	596	protein_coding	secretory leukocyte peptidase inhibitor [Source:HGNC Symbol;Acc:HGNC:11092]	-	156	564	11.028	43.0646
ENSG00000261758	-3.54135	11.6427	1.70381e-05	0.00945762	AC117382.2	3	136752630	136755780	+	3151	antisense	novel transcript, antisense to STAG1	-	3	35	0.0401135	0.505484
ENSG00000074935	-1.85962	3.62911	2.11975e-05	0.0115161	TUBE1	6	112070777	112087529	-	6973	protein_coding	tubulin epsilon 1 [Source:HGNC Symbol;Acc:HGNC:20775]	-	209	732	1.26283	4.77726
ENSG00000115604	-3.25931	9.57526	2.41467e-05	0.012845	IL18R1	2	102311529	102398775	+	4353	protein_coding	interleukin 18 receptor 1 [Source:HGNC Symbol;Acc:HGNC:5988]	-	4	38	0.0387159	0.397267
ENSG00000167995	-2.38201	5.21263	2.59335e-05	0.013514	BEST1	11	61949821	61965515	+	8930	protein_coding	bestrophin 1 [Source:HGNC Symbol;Acc:HGNC:12703]	-	17	86	0.0802076	0.438263
ENSG00000249395	-7.35694	163.931	3.04594e-05	0.0151588	CASC9	8	75223404	75324741	-	1473	lincRNA	cancer susceptibility 9 [Source:HGNC Symbol;Acc:HGNC:48906]	-	0	20	0	0.617895
ENSG00000114248	-2.0394	4.11074	3.06197e-05	0.0151588	LRRC31	3	169839179	169869930	-	3113	protein_coding	leucine rich repeat containing 31 [Source:HGNC Symbol;Acc:HGNC:26261]	-	40	159	0.541376	2.32437
ENSG00000173918	-2.52046	5.73765	3.10494e-05	0.0151588	C1QTNF1	17	79022814	79049788	+	4854	protein_coding	C1q and TNF related 1 [Source:HGNC Symbol;Acc:HGNC:14324]	-	12	67	0.10416	0.628149
ENSG00000171502	-3.45677	10.9797	3.14646e-05	0.0151588	COL24A1	1	85729233	86156943	-	9568	protein_coding	collagen type XXIV alpha 1 chain [Source:HGNC Symbol;Acc:HGNC:20821]	-	3	33	0.0132105	0.156957
ENSG00000125775	-2.59738	6.05188	3.61081e-05	0.0163303	SDCBP2	20	1309909	1329239	-	2653	protein_coding	syndecan binding protein 2 [Source:HGNC Symbol;Acc:HGNC:15756]	-	10	59	0.158811	1.01205
ENSG00000265982	-2.59738	6.05188	3.61081e-05	0.0163303	AC103810.3	17	64778842	64778937	-	96	unprocessed_pseudogene	Rho GTPase-activating protein 27-like protein pseudogene	-	10	59	4.38881	27.9685
ENSG00000002726	2.76318	6.7889	3.64545e-05	0.0163303	AOC1	7	150824627	150861504	+	3824	protein_coding	amine oxidase, copper containing 1 [Source:HGNC Symbol;Acc:HGNC:80]	-	50	7	0.550896	0.0833044
ENSG00000268204	-2.80721	6.99931	3.64545e-05	0.0163303	AC008763.1	19	7633766	7636990	-	843	antisense	novel transcript, antisense to STXBP2	-	7	48	0.349855	2.5912
ENSG00000159708	-2.33086	5.03106	4.01152e-05	0.0175918	LRRC36	16	67326798	67385203	+	4017	protein_coding	leucine rich repeat containing 36 [Source:HGNC Symbol;Acc:HGNC:25615]	-	17	83	0.178306	0.940295
ENSG00000246876	-3.827	14.1919	4.06483e-05	0.0175918	LINC02466	4	129724171	129771481	-	2456	lincRNA	long intergenic non-protein coding RNA 2466 [Source:HGNC Symbol;Acc:HGNC:53405]	-	2	29	0.0343099	0.53735
ENSG00000225806	-2.11424	4.32961	4.19732e-05	0.0178529	AL121917.1	20	58863528	58888809	-	1521	antisense	uncharacterized LOC101927932 [Source:NCBI gene;Acc:101927932]	-	26	109	0.720215	3.26126
ENSG00000162999	-2.08392	4.23957	4.26501e-05	0.0178529	DUSP19	2	183078559	183100005	+	5376	protein_coding	dual specificity phosphatase 19 [Source:HGNC Symbol;Acc:HGNC:18894]	-	29	119	0.227278	1.00734
ENSG00000092054	-7.28341	155.784	4.77659e-05	0.0196718	MYH7	14	23412738	23435718	-	6087	protein_coding	myosin heavy chain 7 [Source:HGNC Symbol;Acc:HGNC:7577]	-	0	19	0	0.142049
ENSG00000128298	-2.2833	4.86789	4.92717e-05	0.0198811	BAIAP2L2	22	38084889	38110670	-	2146	protein_coding	BAI1 associated protein 2 like 2 [Source:HGNC Symbol;Acc:HGNC:26203]	-	18	85	0.353395	1.80251
ENSG00000167525	-2.86705	7.29572	4.98313e-05	0.0198811	PROCA1	17	28703197	28711854	-	4829	protein_coding	protein interacting with cyclin A1 [Source:HGNC Symbol;Acc:HGNC:28600]	-	6	43	0.0523494	0.405228
ENSG00000131389	1.8226	3.53718	5.67715e-05	0.0222526	SLC6A6	3	14402576	14489349	+	8254	protein_coding	solute carrier family 6 member 6 [Source:HGNC Symbol;Acc:HGNC:11052]	-	356	97	1.8172	0.534804
ENSG00000125895	-3.77659	13.7046	5.75184e-05	0.0222526	TMEM74B	20	1180561	1185415	-	2210	protein_coding	transmembrane protein 74B [Source:HGNC Symbol;Acc:HGNC:15893]	-	2	28	0.038129	0.576572
ENSG00000250899	1.99365	3.98244	6.71317e-05	0.0255842	AC125807.2	12	3041437	3044950	+	3514	lincRNA	novel transcript	-	149	36	1.7865	0.466217
ENSG00000078795	-2.94631	7.70774	7.02462e-05	0.0263774	PKD2L2	5	137887968	137942747	+	4653	protein_coding	polycystin 2 like 2, transient receptor potential cation channel [Source:HGNC Symbol;Acc:HGNC:9012]	-	5	38	0.0452746	0.371654
ENSG00000280247	-7.20592	147.638	7.55368e-05	0.0267883	AC005578.1	19	4246339	4247358	-	1020	TEC	TEC	-	0	18	0	0.803082
ENSG00000228661	7.15437	142.455	7.55368e-05	0.0267883	AC090587.1	11	3854318	3855509	-	494	antisense	uncharacterized LOC105376527 [Source:NCBI gene;Acc:105376527]	-	18	0	1.53519	0
ENSG00000255050	-7.20592	147.638	7.55368e-05	0.0267883	AC067930.5	8	143573490	143577397	+	1173	antisense	novel transcript	-	0	18	0	0.698332
ENSG00000255693	-7.20592	147.638	7.55368e-05	0.0267883	LINC02389	12	64883394	64990607	+	5740	lincRNA	long intergenic non-protein coding RNA 2389 [Source:HGNC Symbol;Acc:HGNC:53316]	-	0	18	0	0.142708
ENSG00000146674	1.69081	3.22838	7.91659e-05	0.0276907	IGFBP3	7	45912245	45921874	-	4571	protein_coding	insulin like growth factor binding protein 3 [Source:HGNC Symbol;Acc:HGNC:5472]	-	1436	429	13.2361	4.27104
ENSG00000112715	-1.68035	3.20505	8.10876e-05	0.0279796	VEGFA	6	43770184	43786487	+	14431	protein_coding	vascular endothelial growth factor A [Source:HGNC Symbol;Acc:HGNC:12680]	-	629	1945	1.83642	6.13354
ENSG00000185105	-2.32157	4.99875	8.58981e-05	0.0292443	MYADML2	17	81939645	81947233	-	2452	protein_coding	myeloid associated differentiation marker like 2 [Source:HGNC Symbol;Acc:HGNC:34548]	-	14	68	0.240561	1.26205
ENSG00000230316	-1.83287	3.56246	8.70841e-05	0.029258	FEZF1-AS1	7	122303658	122310077	+	3313	antisense	FEZF1 antisense RNA 1 [Source:HGNC Symbol;Acc:HGNC:41001]	-	68	234	0.864779	3.21427
ENSG00000257354	-2.16581	4.48719	9.35065e-05	0.0310077	AC048341.1	12	62602752	62622213	+	8693	lincRNA	novel transcript	-	20	87	0.0969345	0.455446
ENSG00000266904	-2.10965	4.31585	9.88558e-05	0.0323613	LINC00663	19	19757366	19776423	-	4334	lincRNA	long intergenic non-protein coding RNA 663 [Source:HGNC Symbol;Acc:HGNC:28609]	-	22	92	0.213871	0.966021
ENSG00000261217	-1.91938	3.78259	0.000103929	0.0335914	BCAP31P1	16	33988406	33991551	-	385	unprocessed_pseudogene	B cell receptor associated protein 31 pseudogene 1 [Source:HGNC Symbol;Acc:HGNC:51323]	-	38	139	4.15854	16.4302
ENSG00000255185	-4.34656	20.3445	0.000109596	0.0338113	PDXDC2P	16	70010751	70065945	-	2707	transcribed_unprocessed_pseudogene	pyridoxal dependent decarboxylase domain containing 2, pseudogene [Source:HGNC Symbol;Acc:HGNC:27559]	-	1	22	0.0155643	0.369847
ENSG00000015568	-2.31751	4.9847	0.000115634	0.0338113	RGPD5	2	109792758	109857695	+	14175	protein_coding	RANBP2-like and GRIP domain containing 5 [Source:HGNC Symbol;Acc:HGNC:32418]	-	13	63	0.0386401	0.202258
ENSG00000284512	-3.67016	12.73	0.000116677	0.0338113	AC092718.8	16	81022316	81096284	-	2892	protein_coding	novel protein	-	2	26	0.0291373	0.409131
ENSG00000160808	-3.67016	12.73	0.000116677	0.0338113	MYL3	3	46857872	46882169	-	1360	protein_coding	myosin light chain 3 [Source:HGNC Symbol;Acc:HGNC:7584]	-	2	26	0.0619596	0.870006
ENSG00000251803	-2.64894	6.27208	0.000118807	0.0338113	RF00019	10	17403508	17403620	+	113	misc_RNA		-	7	43	2.60998	17.3172
ENSG00000259248	-2.15406	4.4508	0.00011993	0.0338113	USP3-AS1	15	63544247	63601589	-	7141	antisense	USP3 antisense RNA 1 [Source:HGNC Symbol;Acc:HGNC:44140]	-	19	82	0.112102	0.522568
ENSG00000073756	-7.12403	139.491	0.000120499	0.0338113	PTGS2	1	186671791	186680427	-	5269	protein_coding	prostaglandin-endoperoxide synthase 2 [Source:HGNC Symbol;Acc:HGNC:9605]	-	0	17	0	0.146828
ENSG00000227934	7.0725	134.597	0.000120499	0.0338113	AL732414.1	1	231021611	231022183	+	573	processed_pseudogene	ring finger protein 4 (RNF4) pseudogene	-	17	0	1.25001	0
ENSG00000254186	-7.12403	139.491	0.000120499	0.0338113	AC113414.1	5	162424042	163437326	-	8161	antisense	novel transcript	-	0	17	0	0.0947967
ENSG00000149090	-7.12403	139.491	0.000120499	0.0338113	PAMR1	11	35431823	35530300	-	3863	protein_coding	peptidase domain containing associated with muscle regeneration 1 [Source:HGNC Symbol;Acc:HGNC:24554]	-	0	17	0	0.200268
ENSG00000259657	-7.12403	139.491	0.000120499	0.0338113	PIGHP1	15	59676757	59677321	+	565	processed_pseudogene	phosphatidylinositol glycan anchor biosynthesis class H pseudogene 1 [Source:HGNC Symbol;Acc:HGNC:45152]	-	0	17	0	1.36927
ENSG00000227868	-7.12403	139.491	0.000120499	0.0338113	TEX46	1	23010834	23015850	-	658	protein_coding	testis expressed 46 [Source:HGNC Symbol;Acc:HGNC:44651]	-	0	17	0	1.17574
ENSG00000144045	-1.90492	3.74487	0.000122852	0.0340353	DQX1	2	74518131	74526336	-	2940	protein_coding	DEAQ-box RNA dependent ATPase 1 [Source:HGNC Symbol;Acc:HGNC:20410]	-	37	134	0.53024	2.07417
ENSG00000129595	1.76485	3.39839	0.000124607	0.0340353	EPB41L4A	5	112142441	112419316	-	8582	protein_coding	erythrocyte membrane protein band 4.1 like 4A [Source:HGNC Symbol;Acc:HGNC:13278]	-	261	74	1.28136	0.392402
ENSG00000237080	-2.11232	4.32386	0.000125296	0.0340353	EHMT2-AS1	6	31877808	31884204	+	2571	antisense	EHMT2 and SLC44A4 antisense RNA 1 [Source:HGNC Symbol;Acc:HGNC:39751]	-	21	88	0.34414	1.55764
ENSG00000196517	-1.71319	3.27886	0.000128452	0.034476	SLC6A9	1	43991500	44031467	-	5159	protein_coding	solute carrier family 6 member 9 [Source:HGNC Symbol;Acc:HGNC:11056]	-	121	383	0.988184	3.37848
ENSG00000182632	-2.55655	5.883	0.000129619	0.034476	CCNYL2	10	42408168	42475349	-	3831	transcribed_unprocessed_pseudogene	cyclin Y-like 2 (pseudogene) [Source:HGNC Symbol;Acc:HGNC:23495]	-	8	46	0.0879824	0.546429
ENSG00000283341	-2.2229	4.6683	0.000146896	0.0386684	AC068205.2	11	43578889	43840030	+	2971	processed_transcript	novel transcript	-	15	68	0.212719	1.04158
ENSG00000107014	-1.76806	3.40595	0.000150627	0.0387703	RLN2	9	5299868	5304969	-	1278	protein_coding	relaxin 2 [Source:HGNC Symbol;Acc:HGNC:10027]	-	69	227	2.27476	8.08319
ENSG00000150594	2.10059	4.28884	0.000153781	0.0387703	ADRA2A	10	111077163	111080907	+	3745	protein_coding	adrenoceptor alpha 2A [Source:HGNC Symbol;Acc:HGNC:281]	-	76	17	0.855027	0.206578
ENSG00000214336	3.16957	8.99777	0.000154712	0.0387703	FOXI3	2	88446787	88452656	-	2804	protein_coding	forkhead box I3 [Source:HGNC Symbol;Acc:HGNC:35123]	-	29	3	0.43575	0.048689
ENSG00000214900	-3.27109	9.65377	0.000154712	0.0387703	LINC01588	14	49927571	50092643	-	14763	lincRNA	long intergenic non-protein coding RNA 1588 [Source:HGNC Symbol;Acc:HGNC:27503]	-	3	29	0.00856179	0.0893946
ENSG00000150471	1.81461	3.51765	0.000154875	0.0387703	ADGRL3	4	61201258	62078335	+	13991	protein_coding	adhesion G protein-coupled receptor L3 [Source:HGNC Symbol;Acc:HGNC:20974]	-	179	49	0.539041	0.15938
ENSG00000229425	-4.27983	19.4249	0.000164371	0.0399197	AJ009632.2	21	15370500	15627342	-	8941	lincRNA	uncharacterized LOC101927745 [Source:NCBI gene;Acc:101927745]	-	1	21	0.00471229	0.106886
ENSG00000229404	-4.27983	19.4249	0.000164371	0.0399197	LINC00858	10	84279980	84294659	+	2879	lincRNA	long intergenic non-protein coding RNA 858 [Source:HGNC Symbol;Acc:HGNC:27276]	-	1	21	0.0146344	0.331944
ENSG00000283757	-3.61385	12.2427	0.000167283	0.0399197	AL031686.1	20	46455033	46496731	-	4273	processed_transcript	novel transcript	-	2	25	0.0197204	0.266253
ENSG00000277511	-3.61385	12.2427	0.000167283	0.0399197	AC116407.2	17	32127595	32128454	+	860	lincRNA	novel transcript	-	2	25	0.0979827	1.32291
ENSG00000205794	-3.61385	12.2427	0.000167283	0.0399197	AC098591.1	4	40042917	40057199	-	1613	transcribed_processed_pseudogene	acyl-CoA thioesterase 7 pseudogene [Source:NCBI gene;Acc:344967]	-	2	25	0.0522412	0.705332
ENSG00000090530	1.96968	3.91682	0.000172319	0.0407406	P3H2	3	189956728	190122437	-	5605	protein_coding	prolyl 3-hydroxylase 2 [Source:HGNC Symbol;Acc:HGNC:19317]	-	110	27	0.826866	0.219218
ENSG00000216937	-1.89322	3.71462	0.000174393	0.0408529	CCDC7	10	32446140	32882874	+	9573	protein_coding	coiled-coil domain containing 7 [Source:HGNC Symbol;Acc:HGNC:26533]	-	32	115	0.140838	0.546685
ENSG00000112139	1.85178	3.60946	0.000177657	0.041239	MDGA1	6	37630679	37699306	-	14187	protein_coding	MAM domain containing glycosylphosphatidylinositol anchor 1 [Source:HGNC Symbol;Acc:HGNC:19267]	-	150	40	0.44547	0.128309
ENSG00000228412	2.95443	7.75124	0.000186219	0.0426977	AL022068.1	6	19324988	19839080	-	6189	antisense	uncharacterized LOC100506885 [Source:NCBI gene;Acc:100506885]	-	33	4	0.224653	0.0294122
ENSG00000284707	-7.03722	131.345	0.000193974	0.0426977	AC079781.5	7	97851688	97972985	-	4295	processed_transcript	novel transcript	-	0	16	0	0.169529
ENSG00000132274	-7.03722	131.345	0.000193974	0.0426977	TRIM22	11	5689689	5737089	+	6020	protein_coding	tripartite motif containing 22 [Source:HGNC Symbol;Acc:HGNC:16379]	-	0	16	0	0.120951
ENSG00000258561	-7.03722	131.345	0.000193974	0.0426977	AL359232.1	14	66212810	66509394	-	1797	lincRNA	novel transcript	-	0	16	0	0.405191
ENSG00000224892	-7.03722	131.345	0.000193974	0.0426977	RPS4XP16	13	51454164	51461315	+	997	transcribed_processed_pseudogene	ribosomal protein S4X pseudogene 16 [Source:HGNC Symbol;Acc:HGNC:36365]	-	0	16	0	0.730319
ENSG00000271826	-7.03722	131.345	0.000193974	0.0426977	PLS3-AS1	X	115518182	115562731	-	2075	antisense	PLS3 antisense RNA 1 [Source:HGNC Symbol;Acc:HGNC:50343]	-	0	16	0	0.350905
ENSG00000234630	-2.42008	5.35202	0.000214401	0.0467907	AC245060.2	22	22293733	22294794	+	524	lincRNA	novel transcript	-	9	47	0.723651	4.08182
ENSG00000229994	-2.6509	6.28061	0.000231229	0.0494774	RPL5P4	1	35350722	35351607	+	886	processed_pseudogene	ribosomal protein L5 pseudogene 4 [Source:HGNC Symbol;Acc:HGNC:36095]	-	6	37	0.285322	1.90045
ENSG00000128271	-2.18855	4.55848	0.000238999	0.0494774	ADORA2A	22	24417879	24442360	+	4193	protein_coding	adenosine A2a receptor [Source:HGNC Symbol;Acc:HGNC:263]	-	14	62	0.140676	0.672906
ENSG00000139200	-3.55525	11.7553	0.000240916	0.0494774	PIANP	12	6693792	6700800	-	3266	protein_coding	PILR alpha associated neural protein [Source:HGNC Symbol;Acc:HGNC:25338]	-	2	24	0.0258007	0.334413
ENSG00000137507	-3.55525	11.7553	0.000240916	0.0494774	LRRC32	11	76657524	76670747	-	4459	protein_coding	leucine rich repeat containing 32 [Source:HGNC Symbol;Acc:HGNC:4161]	-	2	24	0.0188978	0.244941
ENSG00000250033	-3.55525	11.7553	0.000240916	0.0494774	SLC7A11-AS1	4	138057464	138178177	+	6161	processed_transcript	SLC7A11 antisense RNA 1 [Source:HGNC Symbol;Acc:HGNC:44064]	-	2	24	0.0136772	0.177275
ENSG00000167653	-1.9009	3.73446	0.000242101	0.0494774	PSCA	8	142670308	142682724	+	1763	protein_coding	prostate stem cell antigen [Source:HGNC Symbol;Acc:HGNC:9500]	-	26	94	0.621354	2.4264
ENSG00000151164	-2.04497	4.12666	0.000244393	0.0494774	RAD9B	12	110501655	110532086	+	3178	protein_coding	RAD9 checkpoint clamp component B [Source:HGNC Symbol;Acc:HGNC:21700]	-	20	80	0.265151	1.14558
ENSG00000184925	-1.73861	3.33714	0.000244694	0.0494774	LCN12	9	136949551	136955497	+	2819	protein_coding	lipocalin 12 [Source:HGNC Symbol;Acc:HGNC:28733]	-	58	187	0.866864	3.0188
ENSG00000154721	-4.20986	18.5052	0.000248027	0.0494774	JAM2	21	25639272	25717562	+	5933	protein_coding	junctional adhesion molecule 2 [Source:HGNC Symbol;Acc:HGNC:14686]	-	1	20	0.00710139	0.153406
ENSG00000231381	-4.20986	18.5052	0.000248027	0.0494774	RNF2P1	9	6668999	6670008	-	1010	processed_pseudogene	ring finger protein 2 pseudogene 1 [Source:HGNC Symbol;Acc:HGNC:33987]	-	1	20	0.0417154	0.901148
ENSG00000255524	-4.20986	18.5052	0.000248027	0.0494774	NPIPB8	16	28637654	28658682	+	2338	protein_coding	nuclear pore complex interacting protein family member B8 [Source:HGNC Symbol;Acc:HGNC:37490]	-	1	20	0.0180208	0.38929
ENSG00000101104	-1.55972	2.94796	0.000252564	0.049992	PABPC1L	20	44910062	44959035	+	4984	protein_coding	poly(A) binding protein cytoplasmic 1 like [Source:HGNC Symbol;Acc:HGNC:15797]	-	520	1479	4.39585	13.5045
ENSG00000172478	-1.81619	3.5215	0.000254587	0.0499986	MAB21L4	2	240886048	240896889	-	2772	protein_coding	mab-21 like 4 [Source:HGNC Symbol;Acc:HGNC:26216]	-	37	126	0.562375	2.06855
ENSG00000244627	-1.82576	3.54493	0.000257696	0.0499986	TPTEP2	22	38335762	38398929	-	3851	transcribed_unprocessed_pseudogene	TPTE pseudogene 2 [Source:HGNC Symbol;Acc:HGNC:53828]	-	35	120	0.382924	1.41806
ENSG00000230234	1.77054	3.41181	0.000258472	0.0499986	AL162582.1	6	160272617	160276130	+	467	lincRNA	uncharacterized LOC105378088 [Source:NCBI gene;Acc:105378088]	-	163	46	14.7058	4.48259
ENSG00000109063	-2.74348	6.69683	0.000280171	0.0537886	MYH3	17	10628526	10657309	-	6684	protein_coding	myosin heavy chain 3 [Source:HGNC Symbol;Acc:HGNC:7573]	-	5	33	0.0315175	0.22468
ENSG00000263412	-2.06407	4.18165	0.000283294	0.0539823	AC004477.1	17	48045141	48048073	-	2933	processed_transcript	novel transcript, antisense to NFE2L1	-	18	73	0.25857	1.13266
ENSG00000284523	-3.16845	8.9908	0.000299755	0.0558682	AC004834.1	7	99252452	99325826	-	4408	antisense	novel transcript	-	3	27	0.0286746	0.278747
ENSG00000223779	-3.16845	8.9908	0.000299755	0.0558682	AC239800.1	1	143745249	143760669	+	869	unprocessed_pseudogene	novel pseudogene, similar to phosphodiesterase 4D interacting protein PDE4DIP	-	3	27	0.145452	1.41394
ENSG00000271138	-3.16845	8.9908	0.000299755	0.0558682	IGLVIVOR22-1	22	25437306	25437823	-	397	IG_V_pseudogene	immunoglobulin lambda variable (IV)/OR22-1 (pseudogene) [Source:HGNC Symbol;Acc:HGNC:15694]	-	3	27	0.318382	3.095
ENSG00000132669	-1.56724	2.96337	0.000312355	0.0566797	RIN2	20	19757606	20002459	+	8273	protein_coding	Ras and Rab interactor 2 [Source:HGNC Symbol;Acc:HGNC:18750]	-	221	632	1.1255	3.4765
ENSG00000126259	-6.94484	123.198	0.000315208	0.0566797	KIRREL2	19	35855861	35867109	+	3382	protein_coding	kirre like nephrin family adhesion molecule 2 [Source:HGNC Symbol;Acc:HGNC:18816]	-	0	15	0	0.201839
ENSG00000266711	-6.94484	123.198	0.000315208	0.0566797	AC021534.1	17	79132722	79136402	+	547	antisense	novel transcript, antisense to RBFOX3	-	0	15	0	1.24793
ENSG00000265975	-6.94484	123.198	0.000315208	0.0566797	AC002091.1	17	8967523	8976995	+	557	lincRNA	novel transcript	-	0	15	0	1.22553
ENSG00000266340	-6.94484	123.198	0.000315208	0.0566797	AC138207.7	17	30978610	30980250	-	668	antisense	novel transcript, antisense RNF135	-	0	15	0	1.02189
ENSG00000255545	-2.08756	4.25028	0.000334323	0.0587394	AP004608.1	11	134436473	134505661	+	8255	processed_transcript	uncharacterized LOC283177 [Source:NCBI gene;Acc:283177]	-	16	66	0.0816621	0.363843
ENSG00000249839	2.08529	4.24361	0.000338325	0.0587394	AC011330.1	15	43663654	43684339	-	3235	unprocessed_pseudogene	histidine acid phosphatase domain containing 2A (HISPPD2A) pseudogene	-	62	14	0.807486	0.196943
ENSG00000234177	-2.25178	4.7627	0.000339042	0.0587394	LINC01114	2	104746638	104757719	-	3751	lincRNA	long intergenic non-protein coding RNA 1114 [Source:HGNC Symbol;Acc:HGNC:49245]	-	11	51	0.123556	0.618744
ENSG00000270392	-2.20989	4.62641	0.00033982	0.0587394	PFN1P2	1	120432204	120434052	-	1849	transcribed_processed_pseudogene	profilin 1 pseudogene 2 [Source:HGNC Symbol;Acc:HGNC:24298]	-	12	54	0.27344	1.32906
ENSG00000130487	-2.91951	7.56591	0.000342416	0.0587394	KLHDC7B	22	50545891	50551023	+	5133	protein_coding	kelch domain containing 7B [Source:HGNC Symbol;Acc:HGNC:25145]	-	4	30	0.0328327	0.265973
ENSG00000226954	-2.91951	7.56591	0.000342416	0.0587394	AL023802.1	22	49718053	49724506	-	3775	lincRNA	novel transcript	-	4	30	0.0446438	0.361653
ENSG00000224259	-1.84671	3.5968	0.000342766	0.0587394	LINC01133	1	159961218	159984750	+	3155	lincRNA	long intergenic non-protein coding RNA 1133 [Source:HGNC Symbol;Acc:HGNC:49447]	-	27	94	0.360564	1.35586
ENSG00000220201	-3.49416	11.268	0.000348534	0.0593298	ZGLP1	19	10304803	10309880	-	2431	protein_coding	zinc finger, GATA-like protein 1 [Source:HGNC Symbol;Acc:HGNC:37245]	zf-GATA	2	23	0.0346627	0.430557
ENSG00000179406	-1.54167	2.91132	0.000356168	0.06013	LINC00174	7	66376044	66493566	-	11354	processed_transcript	long intergenic non-protein coding RNA 174 [Source:HGNC Symbol;Acc:HGNC:27788]	-	257	722	0.953679	2.89385
ENSG00000107338	1.8443	3.59079	0.000357944	0.06013	SHB	9	37919134	38069211	-	2783	protein_coding	SH2 domain containing adaptor protein B [Source:HGNC Symbol;Acc:HGNC:10838]	-	112	30	1.6956	0.490564
ENSG00000018869	-1.65503	3.14931	0.000372517	0.0621689	ZNF582	19	56375846	56393545	-	3350	protein_coding	zinc finger protein 582 [Source:HGNC Symbol;Acc:HGNC:26421]	zf-C2H2	72	219	0.905536	2.975
ENSG00000211892	-4.13632	17.5856	0.000376589	0.0624404	IGHG4	14	105620506	105626066	-	2740	IG_C_gene	immunoglobulin heavy constant gamma 4 (G4m marker) [Source:HGNC Symbol;Acc:HGNC:5528]	-	1	19	0.0153768	0.315566
ENSG00000285907	-1.83825	3.57575	0.000391852	0.0645519	AL161910.1	9	89563537	89604687	-	5273	lincRNA	uncharacterized LOC105376139 [Source:NCBI gene;Acc:105376139]	-	26	90	0.207746	0.776734
ENSG00000272931	2.44216	5.43456	0.000404469	0.0662034	AC099568.2	1	89820174	89820868	-	695	lincRNA	novel transcript	-	40	7	2.4249	0.458354
ENSG00000250182	-2.32518	5.01129	0.000415	0.0665229	EEF1A1P13	5	14651941	14653329	-	1389	processed_pseudogene	eukaryotic translation elongation factor 1 alpha 1 pseudogene 13 [Source:HGNC Symbol;Acc:HGNC:3196]	-	9	44	0.272997	1.44158
ENSG00000284602	-2.32518	5.01129	0.000415	0.0665229	AL031432.4	1	25232586	25234775	+	2190	bidirectional_promoter_lncRNA	novel transcript	-	9	44	0.173148	0.914316
ENSG00000185201	2.22701	4.68163	0.000415552	0.0665229	IFITM2	11	307631	315272	+	1543	protein_coding	interferon induced transmembrane protein 2 [Source:HGNC Symbol;Acc:HGNC:5413]	-	49	10	1.33797	0.294932
ENSG00000115194	3.01275	8.07104	0.000419448	0.0665229	SLC30A3	2	27253684	27275817	-	5978	protein_coding	solute carrier family 30 member 3 [Source:HGNC Symbol;Acc:HGNC:11014]	-	26	3	0.183246	0.0228377
ENSG00000075290	-3.11425	8.65931	0.000419448	0.0665229	WNT8B	10	100463041	100483744	+	2112	protein_coding	Wnt family member 8B [Source:HGNC Symbol;Acc:HGNC:12789]	-	3	26	0.0598474	0.560231
ENSG00000226471	-1.81573	3.52037	0.000433815	0.0678895	Z93930.2	22	28800683	28848559	+	1470	antisense	novel transcript	-	27	92	0.773863	2.84812
ENSG00000100156	-1.81573	3.52037	0.000433815	0.0678895	SLC16A8	22	38078134	38084093	-	2203	protein_coding	solute carrier family 16 member 8 [Source:HGNC Symbol;Acc:HGNC:16270]	-	27	92	0.516377	1.90047
ENSG00000278952	1.92213	3.78983	0.000436041	0.0678895	AP003068.4	11	65118310	65119111	+	802	TEC	TEC	-	75	19	3.94008	1.07812
ENSG00000163631	1.68844	3.22308	0.000450157	0.0692944	ALB	4	73397114	73421412	+	3377	protein_coding	albumin [Source:HGNC Symbol;Acc:HGNC:399]	-	164	49	2.04612	0.660317
ENSG00000198729	1.96143	3.89447	0.000453206	0.0692944	PPP1R14C	6	150143076	150250357	+	2152	protein_coding	protein phosphatase 1 regulatory inhibitor subunit 14C [Source:HGNC Symbol;Acc:HGNC:14952]	-	69	17	1.3509	0.359496
ENSG00000272654	-2.02242	4.06265	0.000453206	0.0692944	AL358472.2	1	153977743	153979160	+	1418	lincRNA	novel transcript	-	17	67	0.505115	2.15024
ENSG00000204789	-1.59576	3.02254	0.000462844	0.0695611	ZNF204P	6	27357825	27360221	-	2397	processed_pseudogene	zinc finger protein 204, pseudogene [Source:HGNC Symbol;Acc:HGNC:12995]	-	86	251	1.51164	4.76533
ENSG00000060982	-2.87081	7.31474	0.000466301	0.0695611	BCAT1	12	24810022	24949459	-	11775	protein_coding	branched chain amino acid transaminase 1 [Source:HGNC Symbol;Acc:HGNC:976]	-	4	29	0.0143125	0.112079
ENSG00000177098	-2.87081	7.31474	0.000466301	0.0695611	SCN4B	11	118133377	118152888	-	5649	protein_coding	sodium voltage-gated channel beta subunit 4 [Source:HGNC Symbol;Acc:HGNC:10592]	-	4	29	0.0298336	0.233622
ENSG00000213057	-2.87081	7.31474	0.000466301	0.0695611	C1orf220	1	178542752	178548889	+	2775	lincRNA	chromosome 1 open reading frame 220 (putative) [Source:HGNC Symbol;Acc:HGNC:33805]	-	4	29	0.0607316	0.475579
ENSG00000184949	-1.65029	3.13896	0.000468571	0.0695611	FAM227A	22	38578120	38656629	-	10781	protein_coding	family with sequence similarity 227 member A [Source:HGNC Symbol;Acc:HGNC:44197]	-	62	188	0.242298	0.793572
ENSG00000271533	-1.75849	3.38344	0.000478947	0.0700216	Z83843.1	X	74209976	74213660	-	3685	sense_intronic	novel transcript, sense intronic FTX	-	33	108	0.377307	1.33375
ENSG00000168930	2.64112	6.23814	0.000495363	0.0700216	TRIM49	11	89797655	89808575	-	2163	protein_coding	tripartite motif containing 49 [Source:HGNC Symbol;Acc:HGNC:13431]	-	33	5	0.642799	0.105196
ENSG00000197635	2.10673	4.30713	0.000498242	0.0700216	DPP4	2	161992241	162074542	-	5009	protein_coding	dipeptidyl peptidase 4 [Source:HGNC Symbol;Acc:HGNC:3009]	-	54	12	0.454214	0.109023
ENSG00000204778	-1.80587	3.4964	0.000499587	0.0700216	CBWD4P	9	65287914	65323015	-	655	unprocessed_pseudogene	COBW domain containing 4 pseudogene [Source:HGNC Symbol;Acc:HGNC:18520]	-	26	88	1.67244	6.11405
ENSG00000233184	-1.65146	3.14151	0.000504384	0.0700216	AC093157.1	1	101025878	101087268	+	2840	antisense	uncharacterized LOC102606465 [Source:NCBI gene;Acc:102606465]	-	57	173	0.845618	2.77214
ENSG00000260668	-2.19421	4.57638	0.000506343	0.0700216	AC093536.1	16	64260570	64261239	-	554	processed_pseudogene	emopamil binding protein-like (EBPL) pseudogene	-	11	49	0.836567	4.02508
ENSG00000259116	-2.19421	4.57638	0.000506343	0.0700216	AL049869.3	14	64513952	64540368	-	1234	antisense	uncharacterized LOC102723809 [Source:NCBI gene;Acc:102723809]	-	11	49	0.375574	1.80704
ENSG00000226744	-2.23915	4.72118	0.000513333	0.0700216	AC005326.1	7	97870167	97870289	+	123	processed_pseudogene	pseudogene similar to asparagine synthetase ASNS	-	10	46	3.42541	17.0193
ENSG00000160181	-6.84614	115.052	0.000517265	0.0700216	TFF2	21	42346357	42351128	-	830	protein_coding	trefoil factor 2 [Source:HGNC Symbol;Acc:HGNC:11756]	-	0	14	0	0.767605
ENSG00000120337	-6.84614	115.052	0.000517265	0.0700216	TNFSF18	1	173039960	173050963	-	2008	protein_coding	TNF superfamily member 18 [Source:HGNC Symbol;Acc:HGNC:11932]	-	0	14	0	0.317287
ENSG00000232977	-6.84614	115.052	0.000517265	0.0700216	LINC00327	13	23466571	23487464	+	3266	lincRNA	long intergenic non-protein coding RNA 327 [Source:HGNC Symbol;Acc:HGNC:42009]	-	0	14	0	0.195074
ENSG00000263718	6.79469	111.021	0.000517265	0.0700216	AC068594.1	17	77257737	77281897	-	1348	lincRNA	uncharacterized LOC105371907 [Source:NCBI gene;Acc:105371907]	-	14	0	0.437579	0
ENSG00000154451	6.79469	111.021	0.000517265	0.0700216	GBP5	1	89258950	89272804	-	8143	protein_coding	guanylate binding protein 5 [Source:HGNC Symbol;Acc:HGNC:19895]	-	14	0	0.0724372	0
ENSG00000127533	6.79469	111.021	0.000517265	0.0700216	F2RL3	19	16888860	16892606	+	3473	protein_coding	F2R like thrombin or trypsin receptor 3 [Source:HGNC Symbol;Acc:HGNC:3540]	-	14	0	0.16984	0
ENSG00000259275	-6.84614	115.052	0.000517265	0.0700216	AC087477.2	15	96354237	96403803	+	5303	lincRNA	novel transcript	-	0	14	0	0.120142
ENSG00000164037	-2.4328	5.3994	0.000519431	0.0700216	SLC9B1	4	102885048	103019739	-	2977	protein_coding	solute carrier family 9 member B1 [Source:HGNC Symbol;Acc:HGNC:24244]	-	7	37	0.0990688	0.565602
ENSG00000169258	1.58666	3.00353	0.000520767	0.0700216	GPRIN1	5	176595802	176610133	-	4211	protein_coding	G protein regulated inducer of neurite outgrowth 1 [Source:HGNC Symbol;Acc:HGNC:24835]	-	240	77	2.40129	0.832134
ENSG00000185168	-2.35549	5.11769	0.000521035	0.0700216	LINC00482	17	81303771	81309248	-	2197	lincRNA	long intergenic non-protein coding RNA 482 [Source:HGNC Symbol;Acc:HGNC:26816]	-	8	40	0.153419	0.828548
ENSG00000160201	-1.55408	2.93646	0.000531862	0.0711025	U2AF1	21	43092956	43107587	-	11112	protein_coding	U2 small nuclear RNA auxiliary factor 1 [Source:HGNC Symbol;Acc:HGNC:12453]	-	109	309	0.413287	1.26548
ENSG00000280734	-2.04267	4.12008	0.000558249	0.074205	LINC01232	13	99486962	99499306	-	6199	processed_transcript	long intergenic non-protein coding RNA 1232 [Source:HGNC Symbol;Acc:HGNC:49755]	-	15	60	0.10195	0.440471
ENSG00000116983	-1.93268	3.81763	0.000567833	0.074205	HPCAL4	1	39678648	39691689	-	4962	protein_coding	hippocalcin like 4 [Source:HGNC Symbol;Acc:HGNC:18212]	-	20	74	0.169821	0.678676
ENSG00000159714	-4.05884	16.666	0.000575412	0.074205	ZDHHC1	16	67394152	67416833	-	3540	protein_coding	zinc finger DHHC-type containing 1 [Source:HGNC Symbol;Acc:HGNC:17916]	-	1	18	0.0119019	0.231397
ENSG00000259583	-4.05884	16.666	0.000575412	0.074205	AC015712.2	15	100892859	100919283	-	6792	antisense	uncharacterized LOC101927751 [Source:NCBI gene;Acc:101927751]	-	1	18	0.00620326	0.120604
ENSG00000219891	3.96114	15.5748	0.000575412	0.074205	ZSCAN12P1	6	28091154	28093664	+	1657	transcribed_unprocessed_pseudogene	zinc finger and SCAN domain containing 12 pseudogene 1 [Source:HGNC Symbol;Acc:HGNC:13850]	-	18	1	0.457686	0.0274641
ENSG00000251365	-4.05884	16.666	0.000575412	0.074205	AC122710.2	5	6765891	6833120	+	2933	lincRNA	novel transcript	-	1	18	0.014365	0.279285
ENSG00000267769	-4.05884	16.666	0.000575412	0.074205	AC011498.6	19	4454014	4455286	+	510	antisense	novel transcript, antisense to UBX6	-	1	18	0.0826129	1.60616
ENSG00000150773	-1.73156	3.32086	0.000587561	0.0748235	PIH1D2	11	112064010	112074274	-	2474	protein_coding	PIH1 domain containing 2 [Source:HGNC Symbol;Acc:HGNC:25210]	-	33	106	0.561995	1.94982
ENSG00000276334	-3.05794	8.32783	0.000589	0.0748235	AL133243.2	2	32521927	32523547	+	1621	sense_intronic	novel transcript, sense intronic to BIRC6	-	3	25	0.0779751	0.701851
ENSG00000226359	-3.05794	8.32783	0.000589	0.0748235	ACTG1P24	17	17242010	17242886	+	877	processed_pseudogene	actin gamma 1 pseudogene 24 [Source:HGNC Symbol;Acc:HGNC:49661]	-	3	25	0.144125	1.29726
ENSG00000279794	-1.81903	3.52844	0.000596735	0.0754308	AC024580.1	19	56149817	56150490	+	674	TEC	TEC	-	24	82	1.50027	5.53658
ENSG00000223745	-1.55594	2.94026	0.000633083	0.0785501	CCDC18-AS1	1	93262186	93346025	-	4786	processed_transcript	CCDC18 antisense RNA 1 [Source:HGNC Symbol;Acc:HGNC:52262]	-	87	247	0.765886	2.34862
ENSG00000144278	-2.20752	4.61882	0.000634842	0.0785501	GALNT13	2	153871913	154453849	+	6520	protein_coding	polypeptide N-acetylgalactosaminyltransferase 13 [Source:HGNC Symbol;Acc:HGNC:23242]	-	10	45	0.0646205	0.314089
ENSG00000177337	-2.20752	4.61882	0.000634842	0.0785501	DLGAP1-AS1	18	3593732	3598352	+	2105	antisense	DLGAP1 antisense RNA 1 [Source:HGNC Symbol;Acc:HGNC:31676]	-	10	45	0.200155	0.972855
ENSG00000233452	-2.8204	7.06357	0.000636793	0.0785501	STXBP5-AS1	6	146841901	147204614	-	6011	antisense	STXBP5 antisense RNA 1 [Source:HGNC Symbol;Acc:HGNC:44183]	-	4	28	0.028037	0.211982
ENSG00000267549	-2.8204	7.06357	0.000636793	0.0785501	AC006116.8	19	56314703	56341287	+	2537	antisense	novel transcript, antisense to ZSCAN5A	-	4	28	0.0664289	0.502256
ENSG00000180178	-1.66644	3.1743	0.000647163	0.0794455	FAR2P1	2	129990456	130051131	-	8075	transcribed_unprocessed_pseudogene	fatty acyl-CoA reductase 2 pseudogene 1 [Source:HGNC Symbol;Acc:HGNC:49284]	-	44	135	0.229577	0.760815
ENSG00000008517	-1.74409	3.34982	0.000655716	0.0795365	IL32	16	3065297	3082192	+	3209	protein_coding	interleukin 32 [Source:HGNC Symbol;Acc:HGNC:16830]	-	29	94	0.380755	1.33305
ENSG00000157343	-2.31908	4.99014	0.000660415	0.0795365	ARMC12	6	35737032	35749079	+	1418	protein_coding	armadillo repeat containing 12 [Source:HGNC Symbol;Acc:HGNC:21099]	-	8	39	0.237701	1.25163
ENSG00000267546	-2.65362	6.29246	0.000660977	0.0795365	AC015802.4	17	76545668	76557683	-	1494	antisense	novel transcript, antisense to PRCD	-	5	31	0.141006	0.944276
ENSG00000262728	-2.3934	5.25395	0.000668181	0.0795365	AC123768.3	15	32586105	32615158	-	1232	antisense	novel transcript, antisense to GOLGA8N	-	7	36	0.23939	1.32978
ENSG00000174326	2.46843	5.5344	0.0006696	0.0795365	SLC16A11	17	7041630	7043923	-	2041	protein_coding	solute carrier family 16 member 11 [Source:HGNC Symbol;Acc:HGNC:23093]	-	35	6	0.722508	0.133781
ENSG00000234685	-2.48642	5.60387	0.0006696	0.0795365	NUS1P2	13	22915651	22916523	+	873	processed_pseudogene	NUS1 pseudogene 2 [Source:HGNC Symbol;Acc:HGNC:38473]	-	6	33	0.289571	1.72023
ENSG00000268362	-1.72035	3.29516	0.000669709	0.0795365	AC092279.1	19	24033445	24066909	+	2191	lincRNA	novel transcript	-	32	102	0.615355	2.11858
ENSG00000064195	1.7941	3.46798	0.000679363	0.0803095	DLX3	17	49990005	49995224	-	2715	protein_coding	distal-less homeobox 3 [Source:HGNC Symbol;Acc:HGNC:2916]	Homeobox	83	23	1.28803	0.385519
ENSG00000136010	-2.06868	4.19502	0.000708139	0.0833254	ALDH1L2	12	105019784	105084577	-	8507	protein_coding	aldehyde dehydrogenase 1 family member L2 [Source:HGNC Symbol;Acc:HGNC:26777]	-	13	53	0.064385	0.283522
ENSG00000249626	-1.68583	3.21726	0.000729229	0.0854134	AC024560.2	3	197634315	197635811	+	1497	processed_pseudogene	protein phosphatase 4, regulatory subunit 2 (PPP4R2) pseudogene	-	36	112	1.01321	3.40474
ENSG00000198691	-3.36365	10.2934	0.000739506	0.0858298	ABCA4	1	93992835	94121132	-	8530	protein_coding	ATP binding cassette subfamily A member 4 [Source:HGNC Symbol;Acc:HGNC:34]	-	2	21	0.00987868	0.112036
ENSG00000158077	-3.36365	10.2934	0.000739506	0.0858298	NLRP14	11	7020446	7071308	+	3628	protein_coding	NLR family pyrin domain containing 14 [Source:HGNC Symbol;Acc:HGNC:22939]	-	2	21	0.0232263	0.263415
ENSG00000170482	-1.97412	3.92889	0.000754736	0.0869381	SLC23A1	5	139367196	139384553	-	3203	protein_coding	solute carrier family 23 member 1 [Source:HGNC Symbol;Acc:HGNC:10974]	-	16	61	0.210465	0.866684
ENSG00000178803	-2.13424	4.39005	0.000759269	0.0869381	ADORA2A-AS1	22	24429206	24495074	-	4025	antisense	ADORA2A antisense RNA 1 [Source:HGNC Symbol;Acc:HGNC:37122]	-	11	47	0.115145	0.531398
ENSG00000279900	-2.13424	4.39005	0.000759269	0.0869381	AP001767.4	11	83083687	83084138	+	452	TEC	TEC	-	11	47	1.02535	4.73203
ENSG00000175928	1.41392	2.66459	0.000801902	0.0893043	LRRN1	3	3799437	3847703	+	4264	protein_coding	leucine rich repeat neuronal 1 [Source:HGNC Symbol;Acc:HGNC:20980]	-	2326	842	22.9832	8.98634
ENSG00000213939	-1.85324	3.61312	0.000803446	0.0893043	AC091153.1	17	4704816	4705217	-	402	processed_pseudogene	ribosomal protein S12 (RPS12) pseudogene	-	22	77	2.30576	8.71671
ENSG00000240522	-2.2236	4.67056	0.000812684	0.0893043	RPL7AP10	19	21149648	21150438	-	791	processed_pseudogene	ribosomal protein L7a pseudogene 10 [Source:HGNC Symbol;Acc:HGNC:32433]	-	9	41	0.479384	2.35882
ENSG00000213626	-2.99934	7.99634	0.000829981	0.0893043	LBH	2	30231369	30323730	+	4697	protein_coding	limb bud and heart development [Source:HGNC Symbol;Acc:HGNC:29532]	-	3	24	0.0269103	0.23253
ENSG00000214814	-2.99934	7.99634	0.000829981	0.0893043	FER1L6	8	123851987	124120061	+	6051	protein_coding	fer-1 like family member 6 [Source:HGNC Symbol;Acc:HGNC:28065]	-	3	24	0.0208887	0.180498
ENSG00000267632	-2.99934	7.99634	0.000829981	0.0893043	AC067852.3	17	42509784	42511519	+	1736	sense_intronic	novel transcript	-	3	24	0.0728097	0.629143
ENSG00000278931	-2.99934	7.99634	0.000829981	0.0893043	CR381670.1	21	8857260	8880976	+	1693	unprocessed_pseudogene	ankyrin repeat domain 20 family, member A3 (ANKRD20A3) pseudogene	-	3	24	0.074659	0.645122
ENSG00000196605	-1.67499	3.19317	0.000856742	0.0893043	ZNF846	19	9751993	9793180	-	3912	protein_coding	zinc finger protein 846 [Source:HGNC Symbol;Acc:HGNC:27260]	zf-C2H2	34	105	0.366183	1.22146
ENSG00000121361	-6.74019	106.905	0.00085757	0.0893043	KCNJ8	12	21764955	21775581	-	2484	protein_coding	potassium voltage-gated channel subfamily J member 8 [Source:HGNC Symbol;Acc:HGNC:6269]	-	0	13	0	0.238166
ENSG00000230836	-6.74019	106.905	0.00085757	0.0893043	LINC01293	2	74940258	74942670	+	1266	lincRNA	long intergenic non-protein coding RNA 1293 [Source:HGNC Symbol;Acc:HGNC:50362]	-	0	13	0	0.467302
ENSG00000238018	-6.74019	106.905	0.00085757	0.0893043	AC093110.1	2	54661011	54680045	-	1236	antisense	novel transcript, antisense to SPTBN1	-	0	13	0	0.478644
ENSG00000204983	-6.74019	106.905	0.00085757	0.0893043	PRSS1	7	142749468	142753076	+	1876	protein_coding	serine protease 1 [Source:HGNC Symbol;Acc:HGNC:9475]	-	0	13	0	0.315354
ENSG00000262434	-6.74019	106.905	0.00085757	0.0893043	AC087392.4	17	789744	790525	-	486	antisense	novel transcript, antisense to RNMTL1	-	0	13	0	1.21729
ENSG00000279926	-6.74019	106.905	0.00085757	0.0893043	AL138831.3	6	3982673	3984130	+	1458	TEC	TEC	-	0	13	0	0.405764
ENSG00000239367	-6.74019	106.905	0.00085757	0.0893043	RN7SL477P	19	1570575	1570860	-	286	misc_RNA	RNA, 7SL, cytoplasmic 477, pseudogene [Source:HGNC Symbol;Acc:HGNC:46493]	-	0	13	0	2.06855
ENSG00000237101	-6.74019	106.905	0.00085757	0.0893043	AC092809.4	1	224219613	224228043	+	1323	antisense	uncharacterized LOC101927164 [Source:NCBI gene;Acc:101927164]	-	0	13	0	0.447169
ENSG00000253334	-6.74019	106.905	0.00085757	0.0893043	AC132219.1	8	81791823	81815714	+	478	antisense	novel transcript, antisense to SNX16	-	0	13	0	1.23767
ENSG00000158691	-1.45726	2.74586	0.000866682	0.0893043	ZSCAN12	6	28378955	28399734	-	5495	protein_coding	zinc finger and SCAN domain containing 12 [Source:HGNC Symbol;Acc:HGNC:13172]	zf-C2H2	180	477	1.38014	3.95038
ENSG00000233013	2.66615	6.34734	0.000872039	0.0893043	FAM157B	9	138217068	138253217	+	2073	transcribed_unprocessed_pseudogene	family with sequence similarity 157 member B [Source:HGNC Symbol;Acc:HGNC:34080]	-	27	4	0.54876	0.0878109
ENSG00000174473	-2.76816	6.8124	0.000872039	0.0893043	GALNTL6	4	171812254	173041559	+	9242	protein_coding	polypeptide N-acetylgalactosaminyltransferase like 6 [Source:HGNC Symbol;Acc:HGNC:33844]	-	4	27	0.0182353	0.132949
ENSG00000142449	-2.4422	5.43468	0.000877744	0.0893043	FBN3	19	8065402	8149846	-	10113	protein_coding	fibrillin 3 [Source:HGNC Symbol;Acc:HGNC:18794]	-	6	32	0.0249971	0.143998
ENSG00000280047	-2.60651	6.09028	0.000883969	0.0893043	AC091825.1	5	142165767	142168387	+	2621	TEC	TEC	-	5	30	0.080375	0.520885
ENSG00000272374	-2.60651	6.09028	0.000883969	0.0893043	Z97832.2	6	35220370	35224630	-	4261	lincRNA	novel transcript, antisense to SCUBE3	-	5	30	0.0494398	0.320404
ENSG00000272341	-3.97695	15.7464	0.000884859	0.0893043	AL137003.2	6	16764346	16766883	+	2538	lincRNA	novel transcript	-	1	17	0.0166007	0.304821
ENSG00000142621	-3.97695	15.7464	0.000884859	0.0893043	FHAD1	1	15247272	15400283	+	12805	protein_coding	forkhead associated phosphopeptide binding domain 1 [Source:HGNC Symbol;Acc:HGNC:29408]	-	1	17	0.00329032	0.0604167
ENSG00000215018	-3.97695	15.7464	0.000884859	0.0893043	COL28A1	7	7356203	7535853	-	6619	protein_coding	collagen type XXVIII alpha 1 chain [Source:HGNC Symbol;Acc:HGNC:22442]	-	1	17	0.0063654	0.116881
ENSG00000205869	-3.97695	15.7464	0.000884859	0.0893043	KRTAP5-1	11	1584342	1585283	-	942	protein_coding	keratin associated protein 5-1 [Source:HGNC Symbol;Acc:HGNC:23596]	-	1	17	0.0447267	0.82127
ENSG00000127507	-3.97695	15.7464	0.000884859	0.0893043	ADGRE2	19	14732393	14778541	-	8622	protein_coding	adhesion G protein-coupled receptor E2 [Source:HGNC Symbol;Acc:HGNC:3337]	-	1	17	0.00488663	0.0897281
ENSG00000254028	-3.97695	15.7464	0.000884859	0.0893043	AC083843.1	8	134832747	134834482	+	849	lincRNA	novel transcript	-	1	17	0.0496261	0.911232
ENSG00000280214	-3.97695	15.7464	0.000884859	0.0893043	AC027682.7	16	67550815	67552935	-	2121	TEC	TEC	-	1	17	0.0198645	0.364751
ENSG00000172201	1.77863	3.43099	0.000960291	0.0963791	ID4	6	19837386	19840684	+	2344	protein_coding	inhibitor of DNA binding 4, HLH protein [Source:HGNC Symbol;Acc:HGNC:5363]	bHLH	75	21	1.3481	0.407708
ENSG00000272645	-1.42089	2.67751	0.000962507	0.0963791	GTF2IP20	1	223951394	223992594	-	4145	transcribed_unprocessed_pseudogene	general transcription factor IIi pseudogene 20 [Source:HGNC Symbol;Acc:HGNC:51732]	-	269	695	2.7343	7.63041
ENSG00000259345	-1.59368	3.01818	0.00101385	0.101124	AC013652.1	15	38865322	39427195	-	6996	lincRNA	novel transcript	-	48	140	0.289074	0.91068
ENSG00000234741	-1.37422	2.59227	0.00102447	0.101712	GAS5	1	173863900	173868882	-	3631	processed_transcript	growth arrest specific 5 [Source:HGNC Symbol;Acc:HGNC:16355]	-	3523	8810	40.8794	110.417
ENSG00000260528	-2.01331	4.03708	0.00102772	0.101712	FAM157C	16	90102271	90178344	+	4524	lincRNA	family with sequence similarity 157 member C [Source:HGNC Symbol;Acc:HGNC:34081]	-	13	51	0.121071	0.513021
ENSG00000196972	1.45747	2.74626	0.00106092	0.104592	SMIM10L2B	X	135094987	135098634	-	2737	protein_coding	small integral membrane protein 10 like 2B [Source:HGNC Symbol;Acc:HGNC:34500]	-	339	119	5.21846	1.97861
ENSG00000196172	-1.43512	2.70405	0.00106927	0.104901	ZNF681	19	23739195	23758891	-	6497	protein_coding	zinc finger protein 681 [Source:HGNC Symbol;Acc:HGNC:26457]	zf-C2H2	164	428	1.06353	2.99791
ENSG00000205517	1.99597	3.98883	0.00108274	0.104901	RGL3	19	11384341	11419342	-	4358	protein_coding	ral guanine nucleotide dissociation stimulator like 3 [Source:HGNC Symbol;Acc:HGNC:30282]	-	50	12	0.483393	0.125309
ENSG00000272384	3.19323	9.14657	0.00108459	0.104901	AC016405.3	8	122779971	122780830	-	860	lincRNA	novel transcript	-	20	2	0.979827	0.105833
ENSG00000267498	-3.29368	9.80609	0.00108459	0.104901	AC007786.1	19	29213235	29215815	+	817	lincRNA	uncharacterized LOC105372352 [Source:NCBI gene;Acc:105372352]	-	2	20	0.10314	1.11403
ENSG00000277199	-3.29368	9.80609	0.00108459	0.104901	LINC01632	1	144627192	144642372	-	939	lincRNA	long intergenic non-protein coding RNA 1632 [Source:HGNC Symbol;Acc:HGNC:52419]	-	2	20	0.0897392	0.969286
ENSG00000263818	-1.94335	3.84597	0.00110661	0.106255	RDM1P5	17	39057019	39113190	+	4171	transcribed_processed_pseudogene	RDM1 pseudogene 5 [Source:HGNC Symbol;Acc:HGNC:53921]	-	15	56	0.15152	0.610992
ENSG00000280007	-2.31123	4.96305	0.00111107	0.106255	AC008079.1	22	18110759	18131154	-	20396	antisense	novel transcript, antisense to TUBA8	-	7	34	0.0144601	0.0758615
ENSG00000179101	-2.31123	4.96305	0.00111107	0.106255	AL590139.1	X	123514473	123514872	+	400	processed_pseudogene	H3 histone, family 3B (H3.3B) (H3F3B) pseudogene	-	7	34	0.73732	3.86818
ENSG00000204623	-1.48175	2.79286	0.00111649	0.106375	ZNRD1ASP	6	30001011	30061640	-	17538	transcribed_unitary_pseudogene	zinc ribbon domain containing 1 antisense, pseudogene [Source:HGNC Symbol;Acc:HGNC:13924]	-	89	240	0.21381	0.622757
ENSG00000108001	1.49864	2.82576	0.00112099	0.106406	EBF3	10	129835283	129963841	-	4623	protein_coding	early B cell factor 3 [Source:HGNC Symbol;Acc:HGNC:19087]	COE	217	74	1.97767	0.728443
ENSG00000254860	-1.58219	2.99423	0.00113051	0.106912	TMEM9B-AS1	11	8964675	8977527	+	1162	antisense	TMEM9B antisense RNA 1 [Source:HGNC Symbol;Acc:HGNC:19230]	-	47	136	1.70416	5.32624
ENSG00000164326	-1.96276	3.89807	0.00116955	0.109614	CARTPT	5	71719163	71721048	+	1216	protein_coding	CART prepropeptide [Source:HGNC Symbol;Acc:HGNC:24323]	-	14	53	0.485079	1.98349
ENSG00000241549	-1.55053	2.92925	0.00117293	0.109614	GUSBP2	6	26871484	26956554	-	2071	transcribed_unprocessed_pseudogene	glucuronidase, beta pseudogene 2 [Source:HGNC Symbol;Acc:HGNC:18792]	-	53	150	1.07824	3.29609
ENSG00000257896	-2.93826	7.66486	0.0011736	0.109614	AC093012.1	12	43736628	43741067	+	1170	transcribed_unprocessed_pseudogene	La ribonucleoprotein domain family, member 7 (LARP7)	-	3	23	0.108032	0.894602
ENSG00000164651	2.45547	5.48491	0.00118483	0.109614	SP8	7	20782283	20786886	-	3718	protein_coding	Sp8 transcription factor [Source:HGNC Symbol;Acc:HGNC:19196]	zf-C2H2	29	5	0.328629	0.0611996
ENSG00000249896	2.45547	5.48491	0.00118483	0.109614	LINC02495	4	6200733	6239937	+	5643	transcribed_unprocessed_pseudogene	long intergenic non-protein coding RNA 2495 [Source:HGNC Symbol;Acc:HGNC:27728]	-	29	5	0.216524	0.0403225
ENSG00000161609	-2.5578	5.8881	0.00118483	0.109614	CCDC155	19	49388218	49417994	+	5624	protein_coding	coiled-coil domain containing 155 [Source:HGNC Symbol;Acc:HGNC:26520]	-	5	29	0.0374578	0.234661
ENSG00000181378	-2.71397	6.56123	0.00119746	0.109985	CFAP65	2	219002846	219041527	-	10519	protein_coding	cilia and flagella associated protein 65 [Source:HGNC Symbol;Acc:HGNC:25325]	-	4	26	0.0160215	0.112483
ENSG00000169040	-2.71397	6.56123	0.00119746	0.109985	PMCHL2	5	71375786	71385993	+	2854	transcribed_unprocessed_pseudogene	pro-melanin concentrating hormone like 2 (pseudogene) [Source:HGNC Symbol;Acc:HGNC:9111]	-	4	26	0.0590505	0.414579
ENSG00000262772	-1.796	3.47257	0.00120418	0.110206	LINC01977	17	79823452	79827704	+	1788	lincRNA	long intergenic non-protein coding RNA 1977 [Source:HGNC Symbol;Acc:HGNC:52804]	-	22	74	0.51841	1.88344
ENSG00000186648	-1.84143	3.58365	0.0012248	0.111693	CARMIL3	14	24052000	24069728	+	6665	protein_coding	capping protein regulator and myosin 1 linker 3 [Source:HGNC Symbol;Acc:HGNC:20272]	-	19	66	0.120108	0.450642
ENSG00000251095	-1.42035	2.6765	0.00125592	0.113952	AC097478.1	4	89551356	89726752	+	6069	antisense	novel transcript	-	144	372	0.999685	2.78942
ENSG00000225506	-1.68466	3.21466	0.00127215	0.113952	CYP4A22-AS1	1	47096653	47179271	-	921	lincRNA	CYP4A22 antisense RNA 1 [Source:HGNC Symbol;Acc:HGNC:43715]	-	27	84	1.23516	4.15057
ENSG00000173852	1.60216	3.03597	0.00128429	0.113952	DPY19L1	7	34928876	35038271	-	6278	protein_coding	dpy-19 like C-mannosyltransferase 1 [Source:HGNC Symbol;Acc:HGNC:22205]	-	123	39	0.825471	0.282703
ENSG00000120885	1.36485	2.57549	0.00130721	0.113952	CLU	8	27596917	27615031	-	6616	protein_coding	clusterin [Source:HGNC Symbol;Acc:HGNC:2095]	-	1231	461	7.83936	3.17098
ENSG00000141665	-1.59517	3.0213	0.00132032	0.113952	FBXO15	18	74073353	74147865	-	6245	protein_coding	F-box protein 15 [Source:HGNC Symbol;Acc:HGNC:13617]	-	38	111	0.256371	0.808869
ENSG00000133466	-1.43408	2.70209	0.00132111	0.113952	C1QTNF6	22	37180167	37199385	-	7143	protein_coding	C1q and TNF related 6 [Source:HGNC Symbol;Acc:HGNC:14343]	-	120	313	0.707813	1.99412
ENSG00000113361	1.4772	2.78408	0.00133324	0.113952	CDH6	5	31193750	31329146	+	12379	protein_coding	cadherin 6 [Source:HGNC Symbol;Acc:HGNC:1765]	-	234	81	0.796431	0.297774
ENSG00000231205	-3.89013	14.8268	0.00136958	0.113952	ZNF826P	19	20340269	20424969	-	6008	transcribed_unprocessed_pseudogene	zinc finger protein 826, pseudogene [Source:HGNC Symbol;Acc:HGNC:33875]	-	1	16	0.00701274	0.121193
ENSG00000267530	3.79248	13.8564	0.00136958	0.113952	LINC01836	19	782755	785080	+	870	lincRNA	long intergenic non-protein coding RNA 1836 [Source:HGNC Symbol;Acc:HGNC:52652]	-	16	1	0.774852	0.052308
ENSG00000261390	-3.89013	14.8268	0.00136958	0.113952	MAFTRR	16	79715232	79770563	-	3218	lincRNA	MAF transcriptional regulator RNA [Source:HGNC Symbol;Acc:HGNC:51525]	-	1	16	0.0130928	0.226267
ENSG00000233609	-3.89013	14.8268	0.00136958	0.113952	RPL10P19	8	8961200	8979025	+	1442	transcribed_processed_pseudogene	ribosomal protein L10 pseudogene 19 [Source:HGNC Symbol;Acc:HGNC:52350]	-	1	16	0.0292181	0.504943
ENSG00000266313	-3.89013	14.8268	0.00136958	0.113952	AC026254.2	17	27333256	27348491	+	454	lincRNA	novel transcript	-	1	16	0.092803	1.60381
ENSG00000279693	-3.89013	14.8268	0.00136958	0.113952	AC099521.2	16	68367325	68370262	-	2938	TEC	novel transcript	-	1	16	0.0143406	0.247831
ENSG00000142515	-1.35165	2.55203	0.00137971	0.113952	KLK3	19	50854915	50860764	+	4639	protein_coding	kallikrein related peptidase 3 [Source:HGNC Symbol;Acc:HGNC:6364]	-	647	1593	5.87622	15.6271
ENSG00000278916	-1.55189	2.93202	0.0013811	0.113952	CEP83-DT	12	94460003	94462484	+	2482	lincRNA	CEP83 divergent transcript [Source:HGNC Symbol;Acc:HGNC:27055]	-	48	136	0.814812	2.49359
ENSG00000265511	-2.03934	4.11057	0.00140429	0.113952	AC020558.2	17	17507351	17508308	+	795	antisense	novel transcript	-	11	44	0.582966	2.51868
ENSG00000126262	-1.74699	3.35658	0.00141007	0.113952	FFAR2	19	35443907	35451767	+	2149	protein_coding	free fatty acid receptor 2 [Source:HGNC Symbol;Acc:HGNC:4501]	-	24	78	0.470536	1.65176
ENSG00000075826	-1.55737	2.94316	0.00142297	0.113952	SEC31B	10	100486642	100519864	-	7938	protein_coding	SEC31 homolog B, COPII coat complex component [Source:HGNC Symbol;Acc:HGNC:23197]	-	45	128	0.238847	0.733815
ENSG00000160321	-1.50936	2.84684	0.00142426	0.113952	ZNF208	19	21932958	22010949	-	6867	protein_coding	zinc finger protein 208 [Source:HGNC Symbol;Acc:HGNC:12999]	zf-C2H2	60	165	0.368131	1.09346
ENSG00000279759	-1.43241	2.69898	0.00143228	0.113952	AC118344.2	19	40355842	40360606	+	4765	TEC	TEC	-	109	284	0.963788	2.71233
ENSG00000197249	-2.26832	4.81761	0.0014361	0.113952	SERPINA1	14	94376747	94390693	-	4902	protein_coding	serpin family A member 1 [Source:HGNC Symbol;Acc:HGNC:8941]	-	7	33	0.0601648	0.306357
ENSG00000100288	-2.26832	4.81761	0.0014361	0.113952	CHKB	22	50578949	50601455	-	3021	protein_coding	choline kinase beta [Source:HGNC Symbol;Acc:HGNC:1938]	-	7	33	0.0976259	0.497108
ENSG00000279283	-2.26832	4.81761	0.0014361	0.113952	AC131009.4	12	131896500	131898239	+	1740	TEC	novel transcript	-	7	33	0.169499	0.863083
ENSG00000100191	-2.26832	4.81761	0.0014361	0.113952	SLC5A4	22	32218476	32255341	-	2030	protein_coding	solute carrier family 5 member 4 [Source:HGNC Symbol;Acc:HGNC:11039]	-	7	33	0.145285	0.739785
ENSG00000122641	6.57446	95.3035	0.00143701	0.113952	INHBA	7	41667168	41705834	-	8302	protein_coding	inhibin subunit beta A [Source:HGNC Symbol;Acc:HGNC:6066]	-	12	0	0.0608999	0
ENSG00000129244	6.57446	95.3035	0.00143701	0.113952	ATP1B2	17	7646627	7657768	+	3276	protein_coding	ATPase Na+/K+ transporting subunit beta 2 [Source:HGNC Symbol;Acc:HGNC:805]	-	12	0	0.154332	0
ENSG00000231340	-6.62583	98.7586	0.00143701	0.113952	ACTG1P10	X	53142832	53143913	-	1082	processed_pseudogene	actin gamma 1 pseudogene 10 [Source:HGNC Symbol;Acc:HGNC:155]	-	0	12	0	0.50471
ENSG00000249790	6.57446	95.3035	0.00143701	0.113952	AC092490.1	12	8788257	8795789	+	2279	lincRNA	novel transcript	-	12	0	0.221848	0
ENSG00000227692	-6.62583	98.7586	0.00143701	0.113952	MED28P3	2	186364598	186365128	+	531	processed_pseudogene	mediator complex subunit 28 pseudogene 3 [Source:HGNC Symbol;Acc:HGNC:45080]	-	0	12	0	1.02843
ENSG00000204584	-6.62583	98.7586	0.00143701	0.113952	FLJ45513	17	49845910	49848837	+	2100	antisense	uncharacterized LOC729220 [Source:NCBI gene;Acc:729220]	-	0	12	0	0.260046
ENSG00000268499	-6.62583	98.7586	0.00143701	0.113952	AC011479.2	19	38199836	38200934	+	432	sense_intronic	novel transcript, sense intronic to SIPA1L3	-	0	12	0	1.26411
ENSG00000163116	-6.62583	98.7586	0.00143701	0.113952	STPG2	4	97184093	98143240	-	5836	protein_coding	sperm tail PG-rich repeat containing 2 [Source:HGNC Symbol;Acc:HGNC:28712]	-	0	12	0	0.0935737
ENSG00000197849	6.57446	95.3035	0.00143701	0.113952	OR8G1	11	124241095	124254364	+	5055	protein_coding	olfactory receptor family 8 subfamily G member 1 (gene/pseudogene) [Source:HGNC Symbol;Acc:HGNC:8484]	-	12	0	0.100018	0
ENSG00000197123	-6.62583	98.7586	0.00143701	0.113952	ZNF679	7	64228474	64266931	+	1567	protein_coding	zinc finger protein 679 [Source:HGNC Symbol;Acc:HGNC:28650]	zf-C2H2	0	12	0	0.348498
ENSG00000147059	-6.62583	98.7586	0.00143701	0.113952	SPIN2A	X	57134530	57137625	-	2889	protein_coding	spindlin family member 2A [Source:HGNC Symbol;Acc:HGNC:20694]	-	0	12	0	0.189026
ENSG00000203837	-6.62583	98.7586	0.00143701	0.113952	PNLIPRP3	10	116427867	116477957	+	2354	protein_coding	pancreatic lipase related protein 3 [Source:HGNC Symbol;Acc:HGNC:23492]	-	0	12	0	0.231986
ENSG00000256481	-6.62583	98.7586	0.00143701	0.113952	AP006333.2	11	64081690	64087175	+	732	antisense	novel transcript, antisense to MACROD1	-	0	12	0	0.746033
ENSG00000235021	-6.62583	98.7586	0.00143701	0.113952	AL591848.2	1	246690047	246691821	+	522	lincRNA	novel transcript	-	0	12	0	1.04616
ENSG00000275374	-6.62583	98.7586	0.00143701	0.113952	AC113385.3	5	100375700	100381398	-	747	unprocessed_pseudogene	glucuronidase, beta (GUSB) pseudogene	-	0	12	0	0.731052
ENSG00000261684	-6.62583	98.7586	0.00143701	0.113952	AC018362.1	15	42497394	42532840	-	3399	antisense	novel transcript, antisense to SNAP23	-	0	12	0	0.160664
ENSG00000270379	-6.62583	98.7586	0.00143701	0.113952	HEATR9	17	35854946	35868891	-	2930	protein_coding	HEAT repeat containing 9 [Source:HGNC Symbol;Acc:HGNC:26548]	-	0	12	0	0.186381
ENSG00000285651	-6.62583	98.7586	0.00143701	0.113952	AL450992.3	1	151885251	151899333	+	2795	antisense	novel transcript, antisense to THEM4	-	0	12	0	0.195383
ENSG00000233122	-1.95574	3.87914	0.00149604	0.118266	CTAGE7P	10	130106046	130108481	+	2436	processed_pseudogene	CTAGE family member 7, pseudogene [Source:HGNC Symbol;Acc:HGNC:25111]	-	13	49	0.224845	0.915391
ENSG00000013364	1.53074	2.88933	0.00150342	0.118483	MVP	16	29820394	29848039	+	6141	protein_coding	major vault protein [Source:HGNC Symbol;Acc:HGNC:7531]	-	150	50	1.02913	0.370526
ENSG00000145020	-2.39657	5.2655	0.00151665	0.118791	AMT	3	49416775	49422753	-	5746	protein_coding	aminomethyltransferase [Source:HGNC Symbol;Acc:HGNC:473]	-	6	31	0.043995	0.245518
ENSG00000202058	-2.39657	5.2655	0.00151665	0.118791	RN7SKP80	22	42565048	42565330	-	283	misc_RNA	RNA, 7SK small nuclear pseudogene 80 [Source:HGNC Symbol;Acc:HGNC:45804]	-	6	31	0.89327	4.98497
ENSG00000172748	-1.41123	2.65964	0.00152407	0.119008	ZNF596	8	232137	264703	+	6008	protein_coding	zinc finger protein 596 [Source:HGNC Symbol;Acc:HGNC:27268]	zf-C2H2	134	344	0.939708	2.60565
ENSG00000271127	-1.56177	2.95215	0.00153154	0.119226	AP000526.1	22	15796959	15798346	+	1388	sense_intronic	novel transcript	-	41	117	1.24455	3.83605
ENSG00000197162	-1.891	3.70891	0.00156395	0.119653	ZNF785	16	30573740	30585771	-	4952	protein_coding	zinc finger protein 785 [Source:HGNC Symbol;Acc:HGNC:26496]	zf-C2H2	15	54	0.127623	0.49625
ENSG00000132561	1.61201	3.05678	0.00158454	0.119653	MATN2	8	97868840	98036716	+	6933	protein_coding	matrilin 2 [Source:HGNC Symbol;Acc:HGNC:6908]	-	108	34	0.656327	0.223175
ENSG00000173157	-2.50739	5.68592	0.00159155	0.119653	ADAMTS20	12	43353866	43551921	-	7242	protein_coding	ADAM metallopeptidase with thrombospondin type 1 motif 20 [Source:HGNC Symbol;Acc:HGNC:17178]	-	5	28	0.029089	0.175949
ENSG00000177374	-2.50739	5.68592	0.00159155	0.119653	HIC1	17	2054154	2063241	+	8108	protein_coding	HIC ZBTB transcriptional repressor 1 [Source:HGNC Symbol;Acc:HGNC:4909]	ZBTB	5	28	0.0259821	0.157156
ENSG00000269959	-2.50739	5.68592	0.00159155	0.119653	SPACA6P-AS	19	51685363	51693456	-	3962	lincRNA	SPACA6P antisense RNA [Source:HGNC Symbol;Acc:HGNC:49383]	-	5	28	0.0531708	0.321611
ENSG00000225057	-2.50739	5.68592	0.00159155	0.119653	AC012485.1	2	238231684	238255633	+	3890	processed_transcript	novel transcript	-	5	28	0.054155	0.327564
ENSG00000250519	-3.22014	9.31878	0.00159793	0.119653	AP002784.1	11	94238150	94279206	+	723	lincRNA	novel transcript	-	2	19	0.116549	1.19592
ENSG00000241889	-3.22014	9.31878	0.00159793	0.119653	AC079944.2	3	113885298	113886031	+	734	processed_pseudogene	dullard homolog (Xenopus laevis) (DULLARD) pseudogene	-	2	19	0.114803	1.178
ENSG00000273387	-3.22014	9.31878	0.00159793	0.119653	AC005005.3	22	31082156	31083565	-	1410	antisense	novel transcript, antisense to SMTN	-	2	19	0.0597625	0.613228
ENSG00000228204	-3.22014	9.31878	0.00159793	0.119653	AC004830.1	7	50866747	51022990	+	911	antisense	novel transcript, antisense to COBL	-	2	19	0.0924974	0.949124
ENSG00000284617	-3.22014	9.31878	0.00159793	0.119653	AC134684.6	8	7611473	7611690	+	218	unprocessed_pseudogene	RNA binding protein, fox-1 homolog (C. elegans) 1 (RBFOX1) pseudogene	-	2	19	0.386537	3.96629
ENSG00000254294	-3.22014	9.31878	0.00159793	0.119653	IMPDH1P6	8	123400582	123402095	+	1514	processed_pseudogene	inosine monophosphate dehydrogenase 1 pseudogene 6 [Source:HGNC Symbol;Acc:HGNC:33961]	-	2	19	0.0556573	0.571104
ENSG00000279827	3.11971	8.69213	0.00159793	0.119653	AC136469.2	19	8444570	8445597	-	1028	TEC	novel transcript	-	19	2	0.778715	0.088537
ENSG00000231431	-1.53696	2.90183	0.00161032	0.120228	FAR2P4	2	131279290	131309068	+	3925	transcribed_unprocessed_pseudogene	fatty acyl-CoA reductase 2 pseudogene 4 [Source:HGNC Symbol;Acc:HGNC:49286]	-	46	129	0.493783	1.49568
ENSG00000225345	-2.65765	6.31006	0.0016487	0.122177	SNX18P3	9	38566260	38568211	-	1952	transcribed_unprocessed_pseudogene	sorting nexin 18 pseudogene 3 [Source:HGNC Symbol;Acc:HGNC:39611]	-	4	25	0.0863372	0.582838
ENSG00000222345	-2.65765	6.31006	0.0016487	0.122177	RF00569	3	52691378	52691453	+	76	snoRNA		-	4	25	2.2175	14.9697
ENSG00000125730	-2.87448	7.33337	0.00166513	0.122177	C3	19	6677704	6730562	-	8328	protein_coding	complement C3 [Source:HGNC Symbol;Acc:HGNC:1318]	-	3	22	0.0151774	0.120218
ENSG00000188693	2.77302	6.83539	0.00166513	0.122177	CYP51A1-AS1	7	92134604	92180725	+	2957	antisense	CYP51A1 antisense RNA 1 [Source:HGNC Symbol;Acc:HGNC:50694]	-	22	3	0.313465	0.0461698
ENSG00000235330	-2.87448	7.33337	0.00166513	0.122177	RPL12P25	9	477750	478423	+	674	transcribed_processed_pseudogene	ribosomal protein L12 pseudogene 25 [Source:HGNC Symbol;Acc:HGNC:37008]	-	3	22	0.187534	1.48542
ENSG00000267474	-2.87448	7.33337	0.00166513	0.122177	AC008569.2	19	14458401	14459366	+	889	sense_intronic	novel transcript, sense intronic to PKN1	-	3	22	0.14218	1.12618
ENSG00000116711	-2.16348	4.47994	0.00172833	0.126189	PLA2G4A	1	186828953	186988981	+	2875	protein_coding	phospholipase A2 group IVA [Source:HGNC Symbol;Acc:HGNC:9035]	-	8	35	0.117238	0.55401
ENSG00000276846	-1.851	3.60749	0.0017297	0.126189	AC016590.3	19	37314868	37315620	-	753	antisense	novel transcript, antisense to HKR1	-	16	56	0.895247	3.38439
ENSG00000221995	-1.53937	2.90668	0.001748	0.127161	TIAF1	17	29073521	29078857	-	5337	protein_coding	TGFB1-induced anti-apoptotic factor 1 [Source:HGNC Symbol;Acc:HGNC:11803]	-	42	118	0.331566	1.00617
ENSG00000267213	-1.80546	3.49541	0.00176666	0.128153	AC007773.1	19	32390050	32405560	-	972	antisense	uncharacterized LOC400684 [Source:NCBI gene;Acc:400684]	-	18	61	0.780233	2.85595
ENSG00000178460	-1.47068	2.77153	0.00177423	0.128338	MCMDC2	8	66870749	66922048	+	6354	protein_coding	minichromosome maintenance domain containing 2 [Source:HGNC Symbol;Acc:HGNC:26368]	-	65	174	0.431007	1.24621
ENSG00000167081	1.4144	2.66549	0.001784	0.12868	PBX3	9	125747345	125967377	+	4529	protein_coding	PBX homeobox 3 [Source:HGNC Symbol;Acc:HGNC:8634]	Homeobox	271	98	2.52107	0.984717
ENSG00000184719	-1.76791	3.4056	0.00179265	0.128939	RNLS	10	88273864	88584530	-	3933	protein_coding	renalase, FAD dependent amine oxidase [Source:HGNC Symbol;Acc:HGNC:25641]	-	20	66	0.214252	0.763673
ENSG00000167524	-1.50644	2.84108	0.00180576	0.129239	SGK494	17	28607964	28614200	-	4663	protein_coding	uncharacterized serine/threonine-protein kinase SgK494 [Source:NCBI gene;Acc:124923]	-	51	140	0.460811	1.36631
ENSG00000161912	-1.92607	3.80018	0.00180693	0.129239	ADCY10P1	6	41101022	41140835	+	5804	transcribed_unprocessed_pseudogene	adenylate cyclase 10, soluble pseudogene 1 [Source:HGNC Symbol;Acc:HGNC:44143]	-	13	48	0.09437	0.376358
ENSG00000273142	-1.37508	2.59383	0.00183263	0.130711	AC073335.2	7	66902857	66906297	+	3441	lincRNA	novel transcript	-	141	353	1.72644	4.6685
ENSG00000146054	-1.48086	2.79115	0.00185678	0.131276	TRIM7	5	181193924	181205293	-	7338	protein_coding	tripartite motif containing 7 [Source:HGNC Symbol;Acc:HGNC:16278]	-	56	151	0.321535	0.936455
ENSG00000213881	-2.22409	4.67216	0.00185899	0.131276	NPM1P6	8	61202350	61203220	+	871	processed_pseudogene	nucleophosmin 1 pseudogene 6 [Source:HGNC Symbol;Acc:HGNC:7926]	-	7	32	0.338608	1.67194
ENSG00000070985	-2.22409	4.67216	0.00185899	0.131276	TRPM5	11	2404515	2423045	-	3962	protein_coding	transient receptor potential cation channel subfamily M member 5 [Source:HGNC Symbol;Acc:HGNC:14323]	-	7	32	0.0744392	0.367556
ENSG00000174514	-1.48467	2.79852	0.00186352	0.131276	MFSD4A	1	205568885	205602918	+	5790	protein_coding	major facilitator superfamily domain containing 4A [Source:HGNC Symbol;Acc:HGNC:25433]	-	54	146	0.392946	1.14752
ENSG00000280149	-2.03809	4.10701	0.00186626	0.131276	AC004877.2	7	149851572	149852170	+	599	TEC	TEC	-	10	40	0.703382	3.03893
ENSG00000162772	-1.32544	2.5061	0.00187885	0.131798	ATF3	1	212565334	212620777	+	4040	protein_coding	activating transcription factor 3 [Source:HGNC Symbol;Acc:HGNC:785]	TF_bZIP	366	885	3.81696	9.96895
ENSG00000226221	-1.32917	2.51258	0.00188513	0.131877	RPL26P19	5	56504635	56505072	-	438	processed_pseudogene	ribosomal protein L26 pseudogene 19 [Source:HGNC Symbol;Acc:HGNC:36393]	-	337	817	32.4171	84.8859
ENSG00000188219	-1.77444	3.42106	0.00191984	0.133938	POTEE	2	131218067	131265278	+	4192	protein_coding	POTE ankyrin domain family member E [Source:HGNC Symbol;Acc:HGNC:33895]	-	19	63	0.190963	0.683923
ENSG00000113070	1.64811	3.13423	0.00194178	0.135099	HBEGF	5	140332843	140346631	-	3018	protein_coding	heparin binding EGF like growth factor [Source:HGNC Symbol;Acc:HGNC:3059]	-	75	23	1.04703	0.346814
ENSG00000175497	1.90693	3.75011	0.00195502	0.135651	DPP10	2	114442299	115845752	+	10005	protein_coding	dipeptidyl peptidase like 10 [Source:HGNC Symbol;Acc:HGNC:20823]	-	47	12	0.197924	0.0545823
ENSG00000078487	-1.4979	2.82432	0.00203741	0.140984	ZCWPW1	7	100400826	100428992	-	3318	protein_coding	zinc finger CW-type and PWWP domain containing 1 [Source:HGNC Symbol;Acc:HGNC:23486]	-	48	131	0.609513	1.79673
ENSG00000197536	-1.50864	2.84542	0.0020649	0.140988	C5orf56	5	132410636	132488702	+	9728	processed_transcript	chromosome 5 open reading frame 56 [Source:HGNC Symbol;Acc:HGNC:33838]	-	44	121	0.190567	0.566043
ENSG00000213398	-1.71597	3.28517	0.0020757	0.140988	LCAT	16	67939750	67944131	-	2625	protein_coding	lecithin-cholesterol acyltransferase [Source:HGNC Symbol;Acc:HGNC:6522]	-	22	70	0.353111	1.21355
ENSG00000165115	-1.398	2.63535	0.00207895	0.140988	KIF27	9	83836698	83921465	-	5140	protein_coding	kinesin family member 27 [Source:HGNC Symbol;Acc:HGNC:18632]	-	90	229	0.73773	2.0275
ENSG00000096093	-1.35105	2.55098	0.00209629	0.140988	EFHC1	6	52362123	52529886	+	22736	protein_coding	EF-hand domain containing 1 [Source:HGNC Symbol;Acc:HGNC:16406]	-	158	389	0.292793	0.778616
ENSG00000231738	-1.97241	3.92424	0.00212538	0.140988	TSPAN19	12	85014311	85036277	-	4085	protein_coding	tetraspanin 19 [Source:HGNC Symbol;Acc:HGNC:31886]	-	11	42	0.113454	0.467891
ENSG00000105810	-3.79775	13.9071	0.00213372	0.140988	CDK6	7	92604921	92836594	-	12260	protein_coding	cyclin dependent kinase 6 [Source:HGNC Symbol;Acc:HGNC:1777]	-	1	15	0.00343659	0.0556786
ENSG00000223756	-3.79775	13.9071	0.00213372	0.140988	TSSC2	11	3380961	3408978	+	3666	transcribed_unprocessed_pseudogene	tumor suppressing subtransferable candidate 2 pseudogene [Source:HGNC Symbol;Acc:HGNC:12384]	-	1	15	0.0114928	0.186203
ENSG00000260398	3.70013	12.9972	0.00213372	0.140988	AC068700.1	8	78605952	78609705	+	3754	sense_overlapping	novel transcript, overlapping to PKIA	-	15	1	0.168351	0.0121225
ENSG00000172461	-3.79775	13.9071	0.00213372	0.140988	FUT9	6	96015984	96215612	+	13719	protein_coding	fucosyltransferase 9 [Source:HGNC Symbol;Acc:HGNC:4020]	-	1	15	0.00307111	0.0497573
ENSG00000196376	3.70013	12.9972	0.00213372	0.140988	SLC35F1	6	117907526	118317676	+	4855	protein_coding	solute carrier family 35 member F1 [Source:HGNC Symbol;Acc:HGNC:21483]	-	15	1	0.130173	0.00937343
ENSG00000205790	-3.79775	13.9071	0.00213372	0.140988	DPP9-AS1	19	4679282	4685948	+	3071	antisense	DPP9 antisense RNA 1 [Source:HGNC Symbol;Acc:HGNC:50706]	-	1	15	0.0137195	0.222279
ENSG00000280367	-3.79775	13.9071	0.00213372	0.140988	AP002364.1	11	90223153	90226538	+	3386	TEC	novel transcript	-	1	15	0.0124432	0.201601
ENSG00000251692	3.70013	12.9972	0.00213372	0.140988	PTX4	16	1485886	1488981	-	1688	protein_coding	pentraxin 4 [Source:HGNC Symbol;Acc:HGNC:14171]	-	15	1	0.374401	0.0269597
ENSG00000223462	-3.79775	13.9071	0.00213372	0.140988	AL353801.1	10	44937508	44955725	+	425	lincRNA	novel transcript	-	1	15	0.0991354	1.60616
ENSG00000234705	-3.79775	13.9071	0.00213372	0.140988	HMGA1P4	9	128663134	128663578	-	334	antisense	high mobility group AT-hook 1 pseudogene 4 [Source:HGNC Symbol;Acc:HGNC:39093]	-	1	15	0.126145	2.04377
ENSG00000172460	3.70013	12.9972	0.00213372	0.140988	PRSS30P	16	2839568	2842744	-	2961	transcribed_unitary_pseudogene	serine protease 30, pseudogene [Source:HGNC Symbol;Acc:HGNC:28753]	-	15	1	0.213437	0.0153691
ENSG00000185070	2.35284	5.10829	0.00214237	0.140988	FLRT2	14	85530144	85654426	+	34899	protein_coding	fibronectin leucine rich transmembrane protein 2 [Source:HGNC Symbol;Acc:HGNC:3761]	-	27	5	0.0325963	0.00651996
ENSG00000228434	-2.45516	5.48373	0.00214237	0.140988	AC004951.1	7	44004046	44007866	-	1866	lincRNA	novel transcript	-	5	27	0.112895	0.658476
ENSG00000240086	-2.45516	5.48373	0.00214237	0.140988	AC092969.1	3	135138469	135439888	-	3849	antisense	novel transcript, antisense to EPHB1	-	5	27	0.0547318	0.31923
ENSG00000154079	-1.37821	2.59945	0.00216555	0.142147	SDHAF4	6	70566917	70589569	+	1440	protein_coding	succinate dehydrogenase complex assembly factor 4 [Source:HGNC Symbol;Acc:HGNC:20957]	-	106	266	3.10142	8.40634
ENSG00000196167	-1.37545	2.59449	0.00218985	0.143373	COLCA1	11	111290787	111305045	-	8733	antisense	colorectal cancer associated 1 [Source:HGNC Symbol;Acc:HGNC:33789]	-	109	273	0.525873	1.42261
ENSG00000258819	-1.61351	3.05996	0.00220467	0.143654	LINC02289	14	77069180	77076344	-	2793	lincRNA	long intergenic non-protein coding RNA 2289 [Source:HGNC Symbol;Acc:HGNC:53205]	-	26	77	0.392211	1.25461
ENSG00000140527	-2.12181	4.35239	0.00220539	0.143654	WDR93	15	89690797	89743638	+	4068	protein_coding	WD repeat domain 93 [Source:HGNC Symbol;Acc:HGNC:26924]	-	8	34	0.0828566	0.380352
ENSG00000070669	-1.34734	2.54442	0.00223889	0.145465	ASNS	7	97852118	97872542	-	4455	protein_coding	asparagine synthetase (glutamine-hydrolyzing) [Source:HGNC Symbol;Acc:HGNC:753]	-	147	361	1.39023	3.68763
ENSG00000278763	-2.59905	6.05889	0.00227587	0.146747	FAM27B	9	67725690	67725902	-	213	processed_pseudogene	family with sequence similarity 27 member B [Source:HGNC Symbol;Acc:HGNC:23667]	-	4	24	0.791222	5.12766
ENSG00000259354	-2.59905	6.05889	0.00227587	0.146747	AC025580.2	15	45448427	45513767	+	3886	antisense	novel transcript, antisense to SLC30A4	-	4	24	0.0433686	0.281058
ENSG00000283342	-2.59905	6.05889	0.00227587	0.146747	AC241584.2	1	147099482	147124285	-	2090	unprocessed_pseudogene	neuroblastoma breakpoint family, member 13, pseudogene	-	4	24	0.0806365	0.52258
ENSG00000171017	1.61505	3.06323	0.00231248	0.148032	LRRC8E	19	7888505	7902021	+	4329	protein_coding	leucine rich repeat containing 8 VRAC subunit E [Source:HGNC Symbol;Acc:HGNC:26272]	-	86	27	0.837006	0.283834
ENSG00000137691	-1.61258	3.05797	0.00235879	0.148032	CFAP300	11	102047443	102084560	+	2647	protein_coding	cilia and flagella associated protein 300 [Source:HGNC Symbol;Acc:HGNC:28188]	-	25	74	0.397927	1.27223
ENSG00000279568	-3.14265	8.83147	0.00236482	0.148032	AC093525.9	16	2575628	2577373	-	1746	TEC	tec	-	2	18	0.0482618	0.469155
ENSG00000244723	-3.14265	8.83147	0.00236482	0.148032	ASLP1	22	23649213	23653334	-	637	unprocessed_pseudogene	argininosuccinate lyase pseudogene 1 [Source:HGNC Symbol;Acc:HGNC:747]	-	2	18	0.132284	1.28594
ENSG00000267733	-3.14265	8.83147	0.00236482	0.148032	AP005264.5	18	12201982	12223539	+	2209	transcribed_processed_pseudogene	solute carrier family 5 (low affinity glucose cotransporter), member 4 (SLC5A4) pseudogene	-	2	18	0.0381463	0.370821
ENSG00000230444	-3.14265	8.83147	0.00236482	0.148032	TFAMP1	7	1614590	1615325	+	736	processed_pseudogene	transcription factor A, mitochondrial pseudogene 1 [Source:HGNC Symbol;Acc:HGNC:11636]	-	2	18	0.114491	1.11297
ENSG00000168496	1.27548	2.4208	0.00236879	0.148032	FEN1	11	61792637	61797244	+	2478	protein_coding	flap structure-specific endonuclease 1 [Source:HGNC Symbol;Acc:HGNC:3650]	-	2728	1087	46.3832	19.9625
ENSG00000267107	-2.80774	7.00189	0.00237037	0.148032	PCAT19	19	41454169	41500649	-	3884	lincRNA	prostate cancer associated transcript 19 [Source:HGNC Symbol;Acc:HGNC:49593]	-	3	21	0.0325432	0.246053
ENSG00000279930	1.42026	2.67634	0.00240135	0.148032	AL032819.2	16	1437154	1439315	+	2162	TEC	TEC	-	175	63	3.41036	1.32609
ENSG00000085276	1.74769	3.35821	0.00241918	0.148032	MECOM	3	169083499	169663618	-	9103	protein_coding	MDS1 and EVI1 complex locus [Source:HGNC Symbol;Acc:HGNC:3498]	zf-C2H2	56	16	0.259192	0.0799877
ENSG00000167751	-1.26429	2.4021	0.00243336	0.148032	KLK2	19	50861568	50880567	+	6394	protein_coding	kallikrein related peptidase 2 [Source:HGNC Symbol;Acc:HGNC:6363]	-	5775	13382	38.0537	95.2437
ENSG00000146216	-6.50163	90.6121	0.00243493	0.148032	TTBK1	6	43243680	43288259	+	10033	protein_coding	tau tubulin kinase 1 [Source:HGNC Symbol;Acc:HGNC:19140]	-	0	11	0	0.0498941
ENSG00000154118	-6.50163	90.6121	0.00243493	0.148032	JPH3	16	87601835	87698156	+	5941	protein_coding	junctophilin 3 [Source:HGNC Symbol;Acc:HGNC:14203]	-	0	11	0	0.0842599
ENSG00000183908	-6.50163	90.6121	0.00243493	0.148032	LRRC55	11	57181747	57191717	+	5410	protein_coding	leucine rich repeat containing 55 [Source:HGNC Symbol;Acc:HGNC:32324]	-	0	11	0	0.0925301
ENSG00000150628	-6.50163	90.6121	0.00243493	0.148032	SPATA4	4	176184638	176195671	-	2464	protein_coding	spermatogenesis associated 4 [Source:HGNC Symbol;Acc:HGNC:17333]	-	0	11	0	0.203161
ENSG00000258646	-6.50163	90.6121	0.00243493	0.148032	AL049780.1	14	75004719	75008481	-	489	antisense	novel transcript, antisense to EIF2B2	-	0	11	0	1.0237
ENSG00000266389	-6.50163	90.6121	0.00243493	0.148032	AC002091.2	17	8965896	8967070	+	402	lincRNA	novel transcript	-	0	11	0	1.24524
ENSG00000155428	-6.50163	90.6121	0.00243493	0.148032	TRIM74	7	72959485	72969466	-	1471	protein_coding	tripartite motif containing 74 [Source:HGNC Symbol;Acc:HGNC:17453]	-	0	11	0	0.340305
ENSG00000285581	-6.50163	90.6121	0.00243493	0.148032	AC091196.1	11	1464582	1467632	-	2432	lincRNA	novel transcript	-	0	11	0	0.205834
ENSG00000265293	-6.50163	90.6121	0.00243493	0.148032	ARGFXP2	17	32150433	32151504	-	949	processed_pseudogene	arginine-fifty homeobox pseudogene 2 [Source:HGNC Symbol;Acc:HGNC:23977]	-	0	11	0	0.52749
ENSG00000280440	-6.50163	90.6121	0.00243493	0.148032	AC002064.3	7	90345873	90346218	-	346	TEC	TEC	-	0	11	0	1.44679
ENSG00000271623	-6.50163	90.6121	0.00243493	0.148032	AC138894.3	16	28364700	28365333	+	634	processed_pseudogene	PRKC, apoptosis, WT1, regulator (PAWR) pseudogene	-	0	11	0	0.789571
ENSG00000248329	-6.50163	90.6121	0.00243493	0.148032	APELA	4	164877004	164898965	+	3089	protein_coding	apelin receptor early endogenous ligand [Source:HGNC Symbol;Acc:HGNC:48925]	-	0	11	0	0.162055
ENSG00000213376	-6.50163	90.6121	0.00243493	0.148032	GAPDHP71	5	174513305	174514307	+	1003	processed_pseudogene	glyceraldehyde-3-phosphate dehydrogenase pseudogene 71 [Source:HGNC Symbol;Acc:HGNC:4149]	-	0	11	0	0.499091
ENSG00000197083	-1.4151	2.66679	0.00244186	0.148101	ZNF300P1	5	150930645	150946289	-	3127	transcribed_unprocessed_pseudogene	zinc finger protein 300 pseudogene 1 [Source:HGNC Symbol;Acc:HGNC:27032]	-	73	188	0.983587	2.73601
ENSG00000134326	1.40784	2.6534	0.00252184	0.152589	CMPK2	2	6840570	6866635	-	4302	protein_coding	cytidine/uridine monophosphate kinase 2 [Source:HGNC Symbol;Acc:HGNC:27015]	-	179	65	1.75307	0.687592
ENSG00000130513	-1.26627	2.40539	0.00256017	0.154491	GDF15	19	18374731	18389176	+	2087	protein_coding	growth differentiation factor 15 [Source:HGNC Symbol;Acc:HGNC:30142]	-	1017	2360	20.5313	51.4609
ENSG00000110025	-1.69795	3.2444	0.00256538	0.154491	SNX15	11	65027408	65040572	+	4915	protein_coding	sorting nexin 15 [Source:HGNC Symbol;Acc:HGNC:14978]	-	21	66	0.180017	0.611094
ENSG00000123094	1.31752	2.49237	0.00257205	0.154529	RASSF8	12	25959029	26079892	+	7619	protein_coding	Ras association domain family member 8 [Source:HGNC Symbol;Acc:HGNC:13232]	-	442	171	2.44423	1.02138
ENSG00000124067	-1.50804	2.84423	0.00258791	0.155117	SLC12A4	16	67943474	67969601	-	8298	protein_coding	solute carrier family 12 member 4 [Source:HGNC Symbol;Acc:HGNC:10913]	-	36	99	0.182788	0.542937
ENSG00000258162	-1.37247	2.58913	0.00260119	0.155547	AC069228.1	12	81378042	81472954	+	2310	antisense	novel transcript, antisense to PPFIA2	-	82	205	1.49561	4.03859
ENSG00000134899	1.55915	2.9468	0.00263095	0.156636	ERCC5	13	102807146	102876001	+	8242	protein_coding	ERCC excision repair 5, endonuclease [Source:HGNC Symbol;Acc:HGNC:3437]	-	98	32	0.50097	0.176687
ENSG00000214967	-1.80873	3.50333	0.00263887	0.156636	NPIPA7	16	16379055	16393954	+	1401	protein_coding	nuclear pore complex interacting protein family member A7 [Source:HGNC Symbol;Acc:HGNC:41982]	-	15	51	0.451098	1.65661
ENSG00000271659	-2.30075	4.92713	0.002639	0.156636	AL161729.4	9	95514045	95514520	+	476	antisense	novel transcript, antisense to PTCH1	-	6	29	0.531083	2.77255
ENSG00000203943	-1.32486	2.50508	0.00264394	0.156636	SAMD13	1	84298366	84389957	+	3455	protein_coding	sterile alpha motif domain containing 13 [Source:HGNC Symbol;Acc:HGNC:24582]	-	146	353	1.78042	4.64959
ENSG00000173727	-1.46062	2.75227	0.00270015	0.159596	AP000769.1	11	65455258	65466720	+	1772	transcribed_unprocessed_pseudogene	Finkel-Biskis-Reilly murine sarcoma virus (FBR-MuSV) ubiquitously expressed (FAU) pseudogene	-	47	125	1.11751	3.21021
ENSG00000107562	-1.67422	3.19148	0.00273042	0.160642	CXCL12	10	44370165	44386493	-	6077	protein_coding	C-X-C motif chemokine ligand 12 [Source:HGNC Symbol;Acc:HGNC:10672]	-	22	68	0.152529	0.509222
ENSG00000095627	-1.67422	3.19148	0.00273042	0.160642	TDRD1	10	114179270	114232304	+	5256	protein_coding	tudor domain containing 1 [Source:HGNC Symbol;Acc:HGNC:11712]	-	22	68	0.176354	0.588764
ENSG00000246465	-1.32119	2.49872	0.00274333	0.16103	AC138904.1	16	28284885	28292064	-	2481	lincRNA	novel transcript LOC100506705	-	136	328	2.30956	6.01637
ENSG00000244879	-1.26888	2.40975	0.00275298	0.161226	GABPB1-AS1	15	50354959	50372202	+	17179	antisense	GABPB1 antisense RNA 1 [Source:HGNC Symbol;Acc:HGNC:44157]	-	477	1109	1.16987	2.93779
ENSG00000173531	-1.29927	2.46105	0.00278557	0.162762	MST1	3	49683947	49689501	-	5084	protein_coding	macrophage stimulating 1 [Source:HGNC Symbol;Acc:HGNC:7380]	-	192	456	1.59116	4.08176
ENSG00000129864	2.06064	4.17171	0.00281747	0.16425	VCY	Y	13985772	13986513	-	550	protein_coding	variable charge Y-linked [Source:HGNC Symbol;Acc:HGNC:12668]	-	35	8	2.68116	0.661934
ENSG00000225032	-1.77174	3.41466	0.00286303	0.166147	AL162586.1	9	127816066	127822520	+	2247	antisense	uncharacterized LOC102723566 [Source:NCBI gene;Acc:102723566]	-	16	53	0.300009	1.0734
ENSG00000283378	-1.77174	3.41466	0.00286303	0.166147	CNTNAP3C	9	61330717	61453030	+	1728	protein_coding	contactin associated protein like 3C [Source:HGNC Symbol;Acc:HGNC:53878]	-	16	53	0.390116	1.39579
ENSG00000284740	-2.40096	5.28155	0.00288962	0.166931	AL645728.2	1	1503250	1509452	+	660	transcribed_unprocessed_pseudogene	ATPase family, AAA domain containing 3C (ATAD3C) pseudogene	-	5	26	0.319186	1.79274
ENSG00000226268	-2.40096	5.28155	0.00288962	0.166931	AC135977.1	11	49433480	49434438	-	959	processed_pseudogene	solute carrier family 25, member 33 (SLC25A33) pseudogene	-	5	26	0.219669	1.23379
ENSG00000236200	-1.54732	2.92275	0.00291676	0.168119	KDM4A-AS1	1	43699765	43708138	-	1931	antisense	KDM4A antisense RNA 1 [Source:HGNC Symbol;Acc:HGNC:40528]	-	29	82	0.632752	1.9325
ENSG00000234742	-1.46417	2.75904	0.0029468	0.169467	AC144530.1	3	197850400	197850954	-	555	processed_pseudogene	ribosomal protein L17 (RPL17) pseudogene	-	42	112	3.18841	9.1836
ENSG00000233836	-1.40684	2.65156	0.00308212	0.176564	AC139769.1	19	23762944	23833314	+	3242	transcribed_unprocessed_pseudogene	zinc finger protein pseudogene	-	57	146	0.740764	2.0494
ENSG00000251364	-1.73827	3.33634	0.00308402	0.176564	AC107884.1	11	7427266	7512515	-	7284	antisense	uncharacterized LOC100506258 [Source:NCBI gene;Acc:100506258]	-	17	55	0.0983324	0.343622
ENSG00000223991	-2.17846	4.52671	0.00312822	0.177131	AC104809.1	2	240981515	240986072	-	2345	antisense	novel transcript	-	7	31	0.125769	0.601598
ENSG00000285704	-2.17846	4.52671	0.00312822	0.177131	AC004765.1	12	865288	867139	-	1161	antisense	novel transcript, antisense to WNK1	-	7	31	0.254029	1.21511
ENSG00000203730	-2.17846	4.52671	0.00312822	0.177131	TEDDM1	1	182398117	182400616	-	2500	protein_coding	transmembrane epididymal protein 1 [Source:HGNC Symbol;Acc:HGNC:30233]	-	7	31	0.117971	0.564299
ENSG00000188171	-1.65289	3.14463	0.00313291	0.177131	ZNF626	19	20620061	20661596	-	6713	protein_coding	zinc finger protein 626 [Source:HGNC Symbol;Acc:HGNC:30461]	zf-C2H2	22	67	0.138078	0.454199
ENSG00000230291	-1.41821	2.67254	0.00314159	0.177131	AC078817.1	12	80102899	80103333	-	435	processed_pseudogene	ribosomal protein L26 (RPL26) pseudogene	-	55	142	5.32711	14.8555
ENSG00000236404	-2.53797	5.80772	0.00314942	0.177131	VLDLR-AS1	9	2421597	2643359	-	5989	antisense	VLDLR antisense RNA 1 [Source:HGNC Symbol;Acc:HGNC:49621]	-	4	23	0.02814	0.174768
ENSG00000251169	-2.53797	5.80772	0.00314942	0.177131	LINC01843	5	134506552	134509229	+	1107	lincRNA	long intergenic non-protein coding RNA 1843 [Source:HGNC Symbol;Acc:HGNC:52659]	-	4	23	0.152241	0.945514
ENSG00000233246	-2.53797	5.80772	0.00314942	0.177131	AL513327.2	1	33350352	33363245	+	490	antisense	uncharacterized LOC101929464 [Source:NCBI gene;Acc:101929464]	-	4	23	0.343939	2.13609
ENSG00000160180	-1.37618	2.5958	0.003163	0.177351	TFF3	21	42311667	42315651	-	1168	protein_coding	trefoil factor 3 [Source:HGNC Symbol;Acc:HGNC:11757]	-	75	188	2.70543	7.32492
ENSG00000146426	-1.43738	2.70828	0.00316723	0.177351	TIAM2	6	154832697	155257723	+	11532	protein_coding	T cell lymphoma invasion and metastasis 2 [Source:HGNC Symbol;Acc:HGNC:11806]	-	47	123	0.171716	0.485387
ENSG00000268189	-1.90224	3.73792	0.0032271	0.179969	AC005785.1	19	15379076	15381194	+	1911	processed_transcript	novel transcript, antisense to AKAP8 and AKAP8L	-	11	40	0.242521	0.952548
ENSG00000188092	1.30143	2.46472	0.00322808	0.179969	GPR89B	1	147928393	147993521	+	5143	protein_coding	G protein-coupled receptor 89B [Source:HGNC Symbol;Acc:HGNC:13840]	-	363	142	2.97377	1.25649
ENSG00000138380	-1.26272	2.39948	0.00329108	0.181783	CARF	2	202912214	202987063	+	8636	protein_coding	calcium responsive transcription factor [Source:HGNC Symbol;Acc:HGNC:14435]	Others	295	683	1.43922	3.59912
ENSG00000156976	-1.2221	2.33286	0.00334506	0.181783	EIF4A2	3	186783205	186789900	+	6133	protein_coding	eukaryotic translation initiation factor 4A2 [Source:HGNC Symbol;Acc:HGNC:3284]	-	7563	17020	51.9564	126.292
ENSG00000266852	-3.69906	12.9875	0.00334606	0.181783	MIR4482	10	104268336	104268405	-	70	miRNA	microRNA 4482 [Source:HGNC Symbol;Acc:HGNC:41792]	-	1	14	0.601894	9.1016
ENSG00000130489	3.60146	12.138	0.00334606	0.181783	SCO2	22	50523568	50525606	-	1022	protein_coding	SCO2, cytochrome c oxidase assembly protein [Source:HGNC Symbol;Acc:HGNC:10604]	-	14	1	0.577158	0.0445284
ENSG00000229368	3.60146	12.138	0.00334606	0.181783	AC090587.2	11	3854612	3855399	+	527	sense_overlapping	novel transcript, sense overlapping STIM1	-	14	1	1.11927	0.0863529
ENSG00000261620	3.60146	12.138	0.00334606	0.181783	HMGN2P41	16	35802869	35803280	-	412	processed_pseudogene	high mobility group nucleosomal binding domain 2 pseudogene 41 [Source:HGNC Symbol;Acc:HGNC:39412]	-	14	1	1.43169	0.110456
ENSG00000206559	-3.69906	12.9875	0.00334606	0.181783	ZCWPW2	3	28349146	28538122	+	2895	protein_coding	zinc finger CW-type and PWWP domain containing 2 [Source:HGNC Symbol;Acc:HGNC:23574]	-	1	14	0.0145536	0.220073
ENSG00000177025	-3.69906	12.9875	0.00334606	0.181783	C19orf18	19	57958437	57974534	-	915	protein_coding	chromosome 19 open reading frame 18 [Source:HGNC Symbol;Acc:HGNC:28642]	-	1	14	0.0460465	0.696297
ENSG00000256006	-3.69906	12.9875	0.00334606	0.181783	AC084117.1	11	18405609	18406731	+	270	sense_intronic	novel transcript	-	1	14	0.156047	2.35967
ENSG00000135218	-3.69906	12.9875	0.00334606	0.181783	CD36	7	80369575	80679277	+	10880	protein_coding	CD36 molecule [Source:HGNC Symbol;Acc:HGNC:1663]	-	1	14	0.00387248	0.0585581
ENSG00000258743	-3.69906	12.9875	0.00334606	0.181783	LINC02301	14	82642620	82706825	+	1754	lincRNA	long intergenic non-protein coding RNA 2301 [Source:HGNC Symbol;Acc:HGNC:53220]	-	1	14	0.0240208	0.363234
ENSG00000265912	-3.69906	12.9875	0.00334606	0.181783	AC037487.1	17	64943262	64951054	+	2474	lincRNA	novel transcript	-	1	14	0.0170301	0.257523
ENSG00000173947	-1.5405	2.90895	0.00337319	0.18197	PIFO	1	111346288	111353013	+	4261	protein_coding	primary cilia formation [Source:HGNC Symbol;Acc:HGNC:27009]	-	27	76	0.266975	0.811689
ENSG00000267325	-2.73777	6.6704	0.00338513	0.18197	LINC01415	18	55776727	55781721	-	4134	lincRNA	long intergenic non-protein coding RNA 1415 [Source:HGNC Symbol;Acc:HGNC:50709]	-	3	20	0.0305752	0.220164
ENSG00000267422	-2.73777	6.6704	0.00338513	0.18197	AC016582.2	19	37779686	37792865	+	1432	transcribed_processed_pseudogene	increased sodium tolerance 1 homolog (yeast) (IST1) pseudogene	-	3	20	0.0882665	0.635587
ENSG00000255366	-2.73777	6.6704	0.00338513	0.18197	AC120036.4	8	47190772	47193262	+	2491	lincRNA	novel transcript	-	3	20	0.0507417	0.365379
ENSG00000235530	-2.73777	6.6704	0.00338513	0.18197	AC087294.1	17	21214331	21230035	+	1519	antisense	novel transcript, antisense to TMEM11	-	3	20	0.0832111	0.599184
ENSG00000092929	-2.25034	4.75794	0.00348955	0.186216	UNC13D	17	75827225	75844717	-	7752	protein_coding	unc-13 homolog D [Source:HGNC Symbol;Acc:HGNC:23147]	-	6	28	0.0326103	0.164374
ENSG00000243289	-2.25034	4.75794	0.00348955	0.186216	AGAP13P	10	46816516	46832476	+	363	unprocessed_pseudogene	ArfGAP with GTPase domain, ankyrin repeat and PH domain 13, pseudogene [Source:HGNC Symbol;Acc:HGNC:23499]	-	6	28	0.696406	3.51026
ENSG00000269466	2.1478	4.43153	0.00348955	0.186216	H3.Y	5	17654870	17655847	-	978	protein_coding	histone cluster 2, H3c pseudogene [Source:NCBI gene;Acc:391769]	-	28	6	1.20625	0.27919
ENSG00000142748	2.96037	7.78326	0.00351516	0.186216	FCN3	1	27369112	27374824	-	2167	protein_coding	ficolin 3 [Source:HGNC Symbol;Acc:HGNC:3625]	-	17	2	0.330528	0.0420009
ENSG00000280310	2.96037	7.78326	0.00351516	0.186216	AC092437.1	4	4820405	4821452	+	1048	TEC	tec	-	17	2	0.683448	0.0868473
ENSG00000215032	2.96037	7.78326	0.00351516	0.186216	GNL3LP1	5	60891935	60893577	-	1643	processed_pseudogene	G protein nucleolar 3 like pseudogene 1 [Source:HGNC Symbol;Acc:HGNC:25733]	-	17	2	0.435942	0.0553962
ENSG00000268447	-3.06077	8.34415	0.00351516	0.186216	SSX2B	X	52751132	52790305	+	2255	protein_coding	SSX family member 2B [Source:HGNC Symbol;Acc:HGNC:22263]	-	2	17	0.0373681	0.343076
ENSG00000260572	-1.52569	2.87924	0.00352863	0.186542	AC069224.1	3	160753428	160755142	-	1715	antisense	novel transcript, antisense to PPM1L	-	28	78	0.687879	2.06975
ENSG00000255717	-1.21985	2.32922	0.00353856	0.186681	SNHG1	11	62851988	62855914	-	3756	processed_transcript	small nucleolar RNA host gene 1 [Source:HGNC Symbol;Acc:HGNC:32688]	-	1583	3557	17.7571	43.0969
ENSG00000158050	1.25483	2.3864	0.00355933	0.18739	DUSP2	2	96143166	96145440	-	1932	protein_coding	dual specificity phosphatase 2 [Source:HGNC Symbol;Acc:HGNC:3068]	-	584	236	12.7357	5.55895
ENSG00000255458	-1.63123	3.09778	0.00359568	0.188506	AC108471.2	4	39639140	39666644	+	2301	lincRNA	novel transcript	-	22	66	0.402832	1.30531
ENSG00000130783	-1.92597	3.79993	0.00360547	0.188506	CCDC62	12	122774327	122827528	+	4479	protein_coding	coiled-coil domain containing 62 [Source:HGNC Symbol;Acc:HGNC:30723]	-	10	37	0.0940669	0.375931
ENSG00000255142	-1.92597	3.79993	0.00360547	0.188506	AP006621.2	11	781645	782105	+	284	lincRNA	novel transcript	-	10	37	1.48354	5.92886
ENSG00000112499	1.46538	2.76135	0.00361006	0.188506	SLC22A2	6	160171061	160277638	-	6171	protein_coding	solute carrier family 22 member 2 [Source:HGNC Symbol;Acc:HGNC:10966]	-	109	38	0.744199	0.280231
ENSG00000157514	-1.23788	2.35851	0.0036291	0.189113	TSC22D3	X	107713221	107777342	-	4766	protein_coding	TSC22 domain family member 3 [Source:HGNC Symbol;Acc:HGNC:3051]	TSC22	381	867	3.36813	8.27852
ENSG00000230074	-1.49116	2.81116	0.00370239	0.192539	AL162231.2	9	34665665	34681298	+	665	antisense	novel transcript	-	32	87	2.02743	5.95368
ENSG00000213866	1.50014	2.82871	0.00371425	0.192611	YBX1P10	9	35971344	35972318	-	975	processed_pseudogene	Y-box binding protein 1 pseudogene 10 [Source:HGNC Symbol;Acc:HGNC:42432]	-	97	33	4.19165	1.54027
ENSG00000151640	1.43576	2.70524	0.00371992	0.192611	DPYSL4	10	132186900	132205776	+	3176	protein_coding	dihydropyrimidinase like 4 [Source:HGNC Symbol;Acc:HGNC:3016]	-	118	42	1.56538	0.601806
ENSG00000152475	1.32665	2.5082	0.0037264	0.192611	ZNF837	19	58367618	58381060	-	2076	protein_coding	zinc finger protein 837 [Source:HGNC Symbol;Acc:HGNC:25164]	zf-C2H2	229	88	4.64757	1.92905
ENSG00000069493	-1.37691	2.59712	0.00378108	0.195043	CLEC2D	12	9664969	9699555	+	6957	protein_coding	C-type lectin domain family 2 member D [Source:HGNC Symbol;Acc:HGNC:14351]	-	57	143	0.3452	0.935409
ENSG00000226057	-1.35919	2.56541	0.00381979	0.196642	PHF2P2	13	18946755	19062718	-	3957	transcribed_unprocessed_pseudogene	PHD finger protein 2 pseudogene 2 [Source:HGNC Symbol;Acc:HGNC:38808]	-	67	166	0.713389	1.9091
ENSG00000268606	1.32929	2.51279	0.00385979	0.198302	MAGEA2	X	152749863	152753884	-	2272	protein_coding	MAGE family member A2 [Source:HGNC Symbol;Acc:HGNC:6800]	-	219	84	4.06119	1.68251
ENSG00000269821	-1.27209	2.41512	0.00387615	0.198742	KCNQ1OT1	11	2608328	2699994	-	91667	antisense	KCNQ1 opposite strand/antisense transcript 1 [Source:HGNC Symbol;Acc:HGNC:6295]	-	142	331	0.0652669	0.164325
ENSG00000259895	-2.34465	5.07937	0.00390492	0.199816	AC106820.2	16	2464950	2468213	-	3264	antisense	uncharacterized LOC729652 [Source:NCBI gene;Acc:729652]	-	5	25	0.0645413	0.34856
ENSG00000228775	-1.59113	3.01285	0.00396221	0.20008	WEE2-AS1	7	141704338	141738346	-	3504	antisense	WEE2 antisense RNA 1 [Source:HGNC Symbol;Acc:HGNC:48669]	-	24	70	0.288579	0.909121
ENSG00000255418	-1.53254	2.89295	0.00396221	0.20008	AC090092.1	11	23164900	23203161	+	930	lincRNA	novel transcript	-	25	70	1.1326	3.42533
ENSG00000263327	-1.39447	2.62891	0.00400462	0.20008	TAPT1-AS1	4	16226685	16320140	+	2763	antisense	TAPT1 antisense RNA 1 (head to head) [Source:HGNC Symbol;Acc:HGNC:26832]	-	50	127	0.762442	2.09175
ENSG00000237330	1.66844	3.17871	0.00401511	0.20008	RNF223	1	1070966	1074307	-	1902	protein_coding	ring finger protein 223 [Source:HGNC Symbol;Acc:HGNC:40020]	-	53	16	1.17404	0.382822
ENSG00000245498	-1.35048	2.54997	0.0040539	0.20008	AP000866.1	11	124800450	124834487	+	4854	antisense	uncharacterized LOC100507283 [Source:NCBI gene;Acc:100507283]	-	67	165	0.581558	1.54693
ENSG00000148408	-2.13135	4.38127	0.00406587	0.20008	CACNA1B	9	137877789	138124624	+	9897	protein_coding	calcium voltage-gated channel subunit alpha1 B [Source:HGNC Symbol;Acc:HGNC:1389]	-	7	30	0.0297997	0.137945
ENSG00000269925	-2.13135	4.38127	0.00406587	0.20008	Z98884.2	1	7776383	7776775	+	393	sense_intronic	novel transcript, sense intronic to VAMP3	-	7	30	0.750453	3.47389
ENSG00000197520	-2.13135	4.38127	0.00406587	0.20008	FAM177B	1	222737207	222750805	+	2603	protein_coding	family with sequence similarity 177 member B [Source:HGNC Symbol;Acc:HGNC:34395]	-	7	30	0.113303	0.524487
ENSG00000144015	2.02865	4.08023	0.00406587	0.20008	TRIM43	2	95592018	95599778	+	1682	protein_coding	tripartite motif containing 43 [Source:HGNC Symbol;Acc:HGNC:19015]	-	30	7	0.751473	0.189391
ENSG00000023445	-1.33731	2.52681	0.00414134	0.20008	BIRC3	11	102317450	102339403	+	7518	protein_coding	baculoviral IAP repeat containing 3 [Source:HGNC Symbol;Acc:HGNC:591]	-	75	183	0.420317	1.10774
ENSG00000149599	-1.34976	2.54869	0.00415377	0.20008	DUSP15	20	31847637	31870747	-	3791	protein_coding	dual specificity phosphatase 15 [Source:HGNC Symbol;Acc:HGNC:16236]	-	65	160	0.722399	1.92068
ENSG00000091513	-6.36572	82.4655	0.00417417	0.20008	TF	3	133745956	133796640	+	26199	protein_coding	transferrin [Source:HGNC Symbol;Acc:HGNC:11740]	-	0	10	0	0.0173701
ENSG00000157087	-6.36572	82.4655	0.00417417	0.20008	ATP2B2	3	10324023	10708007	-	10331	protein_coding	ATPase plasma membrane Ca2+ transporting 2 [Source:HGNC Symbol;Acc:HGNC:815]	-	0	10	0	0.0440499
ENSG00000167178	6.31445	79.5863	0.00417417	0.20008	ISLR2	15	74100311	74138540	+	6101	protein_coding	immunoglobulin superfamily containing leucine rich repeat 2 [Source:HGNC Symbol;Acc:HGNC:29286]	-	10	0	0.0690584	0
ENSG00000113580	-6.36572	82.4655	0.00417417	0.20008	NR3C1	5	143277931	143435512	-	9172	protein_coding	nuclear receptor subfamily 3 group C member 1 [Source:HGNC Symbol;Acc:HGNC:7978]	ESR-like	0	10	0	0.0496162
ENSG00000175874	-6.36572	82.4655	0.00417417	0.20008	CREG2	2	101345551	101387595	-	7150	protein_coding	cellular repressor of E1A stimulated genes 2 [Source:HGNC Symbol;Acc:HGNC:14272]	-	0	10	0	0.0636475
ENSG00000071967	-6.36572	82.4655	0.00417417	0.20008	CYBRD1	2	171522247	171558133	+	5176	protein_coding	cytochrome b reductase 1 [Source:HGNC Symbol;Acc:HGNC:20797]	-	0	10	0	0.0879212
ENSG00000164430	-6.36572	82.4655	0.00417417	0.20008	CGAS	6	73413515	73452276	-	4155	protein_coding	cyclic GMP-AMP synthase [Source:HGNC Symbol;Acc:HGNC:21367]	-	0	10	0	0.109526
ENSG00000180929	6.31445	79.5863	0.00417417	0.20008	GPR62	3	51955314	51957504	+	2191	protein_coding	G protein-coupled receptor 62 [Source:HGNC Symbol;Acc:HGNC:13301]	-	10	0	0.192298	0
ENSG00000123892	-6.36572	82.4655	0.00417417	0.20008	RAB38	11	88113242	88175467	-	1465	protein_coding	RAB38, member RAS oncogene family [Source:HGNC Symbol;Acc:HGNC:9776]	-	0	10	0	0.310635
ENSG00000124657	-6.36572	82.4655	0.00417417	0.20008	OR2B6	6	27957241	27958182	+	942	protein_coding	olfactory receptor family 2 subfamily B member 6 [Source:HGNC Symbol;Acc:HGNC:8241]	-	0	10	0	0.4831
ENSG00000285602	-6.36572	82.4655	0.00417417	0.20008	AC097625.1	X	15561047	15675608	-	3666	protein_coding	novel protein	-	0	10	0	0.124135
ENSG00000234789	6.31445	79.5863	0.00417417	0.20008	AL590369.1	9	129640476	129641282	+	470	antisense	novel transcript	-	10	0	0.896437	0
ENSG00000252965	6.31445	79.5863	0.00417417	0.20008	RF00019	3	125528244	125528349	-	106	misc_RNA		-	10	0	3.97477	0
ENSG00000267560	6.31445	79.5863	0.00417417	0.20008	AC027514.2	18	62300036	62300998	-	637	antisense	novel transcript, antisense to KIAA1468	-	10	0	0.661422	0
ENSG00000186235	-6.36572	82.4655	0.00417417	0.20008	AC016757.1	2	238224552	238231677	-	2906	processed_transcript	uncharacterized LOC151174 [Source:NCBI gene;Acc:151174]	-	0	10	0	0.1566
ENSG00000064205	6.31445	79.5863	0.00417417	0.20008	WISP2	20	44714844	44728509	+	4981	protein_coding	WNT1 inducible signaling pathway protein 2 [Source:HGNC Symbol;Acc:HGNC:12770]	-	10	0	0.0845865	0
ENSG00000237087	-6.36572	82.4655	0.00417417	0.20008	AC068134.2	2	232420661	232421461	-	576	lincRNA	novel transcript	-	0	10	0	0.790069
ENSG00000200591	-6.36572	82.4655	0.00417417	0.20008	RF00019	1	32639951	32640052	+	102	misc_RNA		-	0	10	0	4.46157
ENSG00000206585	6.31445	79.5863	0.00417417	0.20008	RNVU1-7	1	148038753	148038916	-	164	snRNA	RNA, variant U1 small nuclear 7 [Source:HGNC Symbol;Acc:HGNC:37500]	-	10	0	2.56906	0
ENSG00000154485	-6.36572	82.4655	0.00417417	0.20008	MMP21	10	125766453	125775821	-	1919	protein_coding	matrix metallopeptidase 21 [Source:HGNC Symbol;Acc:HGNC:14357]	-	0	10	0	0.237144
ENSG00000221387	-6.36572	82.4655	0.00417417	0.20008	RNU6ATAC8P	8	102421197	102421322	+	126	snRNA	RNA, U6atac small nuclear 8, pseudogene [Source:HGNC Symbol;Acc:HGNC:46907]	-	0	10	0	3.61175
ENSG00000276036	6.31445	79.5863	0.00417417	0.20008	RNA5SP440	17	38731802	38731920	-	119	rRNA_pseudogene	RNA, 5S ribosomal pseudogene 440 [Source:HGNC Symbol;Acc:HGNC:43340]	-	10	0	3.54055	0
ENSG00000129749	-1.75891	3.38442	0.0041765	0.20008	CHRNA10	11	3665587	3671384	-	2703	protein_coding	cholinergic receptor nicotinic alpha 10 subunit [Source:HGNC Symbol;Acc:HGNC:13800]	-	14	46	0.218223	0.774461
ENSG00000241288	-1.2823	2.43226	0.00419582	0.200629	AC092902.2	3	125827238	125916384	-	6732	processed_transcript	uncharacterized LOC101927056 [Source:NCBI gene;Acc:101927056]	-	115	270	0.719733	1.82519
ENSG00000225265	-1.34899	2.54733	0.00426141	0.203385	TAF1A-AS1	1	222589825	222593032	+	1450	antisense	TAF1A antisense RNA 1 [Source:HGNC Symbol;Acc:HGNC:40573]	-	63	155	1.83059	4.86465
ENSG00000130751	-1.68495	3.21529	0.0042729	0.203553	NPAS1	19	47019820	47045775	+	2582	protein_coding	neuronal PAS domain protein 1 [Source:HGNC Symbol;Acc:HGNC:7894]	Others	17	53	0.277403	0.93413
ENSG00000228878	-1.63067	3.09657	0.00431373	0.20436	SEPT7-AS1	7	35751856	35800616	-	4051	lincRNA	SEPT7 antisense RNA 1 (head to head) [Source:HGNC Symbol;Acc:HGNC:51153]	-	20	60	0.208011	0.674026
ENSG00000232545	-1.63067	3.09657	0.00431373	0.20436	AC253536.3	22	24101689	24103354	+	558	sense_intronic	novel transcript	-	20	60	1.51013	4.89333
ENSG00000224358	-1.50209	2.83252	0.00431386	0.20436	AL451074.2	1	165768929	165775176	+	2150	antisense	uncharacterized LOC100147773 [Source:NCBI gene;Acc:100147773]	-	27	74	0.529107	1.56632
ENSG00000258798	-1.8136	3.51517	0.00434191	0.204929	AL133153.2	14	91418266	91421176	+	303	lincRNA	novel transcript, antisense to CCDC88C	-	12	41	1.66862	6.15785
ENSG00000185837	-1.8136	3.51517	0.00434191	0.204929	HDHD5-AS1	22	17159384	17165445	+	631	antisense	HDHD5 antisense RNA 1 [Source:HGNC Symbol;Acc:HGNC:1842]	-	12	41	0.801253	2.95694
ENSG00000243981	-2.47419	5.55655	0.00436855	0.205426	AC064862.6	7	57628479	57645189	-	1022	transcribed_processed_pseudogene	pseudogene similar to part of family with sequence similarity 182, member A FAM182A	-	4	22	0.164902	0.979624
ENSG00000125788	-2.47419	5.55655	0.00436855	0.205426	DEFB126	20	142369	145751	+	655	protein_coding	defensin beta 126 [Source:HGNC Symbol;Acc:HGNC:15900]	-	4	22	0.257298	1.52851
ENSG00000175556	-1.46898	2.76826	0.00444838	0.208796	LONRF3	X	118974614	119018355	+	4041	protein_coding	LON peptidase N-terminal domain and ring finger 3 [Source:HGNC Symbol;Acc:HGNC:21152]	-	31	83	0.323214	0.93471
ENSG00000247095	-1.36654	2.57852	0.00446426	0.209157	MIR210HG	11	565660	568457	-	2321	lincRNA	MIR210 host gene [Source:HGNC Symbol;Acc:HGNC:39524]	-	55	137	0.998402	2.68617
ENSG00000154874	-1.24498	2.37016	0.00447437	0.209246	CCDC144B	17	18537800	18625617	-	9900	transcribed_unprocessed_pseudogene	coiled-coil domain containing 144B (pseudogene) [Source:HGNC Symbol;Acc:HGNC:26704]	-	174	398	0.740512	1.82951
ENSG00000119725	-1.48827	2.80553	0.00448401	0.209314	ZNF410	14	73886617	73932511	+	6486	protein_coding	zinc finger protein 410 [Source:HGNC Symbol;Acc:HGNC:20144]	zf-C2H2	28	76	0.181886	0.533242
ENSG00000189419	-1.88658	3.69757	0.00449771	0.209571	SPATA41	15	100344047	100349822	-	4880	lincRNA	spermatogenesis associated 41 [Source:HGNC Symbol;Acc:HGNC:48613]	-	10	36	0.0863372	0.335715
ENSG00000255007	-1.51182	2.85169	0.00451322	0.20991	LINC02489	11	46256355	46274547	-	354	antisense	long intergenic non-protein coding RNA 2489 [Source:HGNC Symbol;Acc:HGNC:53470]	-	25	69	2.97546	8.8702
ENSG00000166405	-1.2715	2.41413	0.00455236	0.211345	RIC3	11	8106093	8169055	-	7657	protein_coding	RIC3 acetylcholine receptor chaperone [Source:HGNC Symbol;Acc:HGNC:30338]	-	112	261	0.616279	1.55121
ENSG00000275993	1.34564	2.54144	0.00458712	0.21222	SIK1B	21	6111134	6123739	+	4806	protein_coding	salt inducible kinase 1B (putative) [Source:HGNC Symbol;Acc:HGNC:52389]	-	153	58	1.3413	0.549202
ENSG00000205740	-1.36627	2.57803	0.00460618	0.21222	AL359878.1	10	971146	988341	-	4964	processed_transcript	novel transcript, antisense to GTPBP4	-	53	132	0.449844	1.21012
ENSG00000127589	1.39306	2.62635	0.00462046	0.21222	TUBBP1	8	30351873	30353518	+	1646	transcribed_processed_pseudogene	tubulin beta pseudogene 1 [Source:HGNC Symbol;Acc:HGNC:12414]	-	120	44	3.07163	1.2165
ENSG00000264204	-2.1981	4.58876	0.00462106	0.21222	AGAP7P	10	46109621	46131358	+	2062	unprocessed_pseudogene	ArfGAP with GTPase domain, ankyrin repeat and PH domain 7, pseudogene [Source:HGNC Symbol;Acc:HGNC:23465]	-	6	27	0.122597	0.595885
ENSG00000260778	-2.1981	4.58876	0.00462106	0.21222	AC009065.4	16	2268155	2273418	+	980	lincRNA	uncharacterized LOC106660606 [Source:NCBI gene;Acc:106660606]	-	6	27	0.257954	1.25379
ENSG00000254480	-2.1981	4.58876	0.00462106	0.21222	AC015689.1	11	4187140	4202655	+	462	lincRNA	uncharacterized LOC100506082 [Source:NCBI gene;Acc:100506082]	-	6	27	0.547176	2.65956
ENSG00000172348	1.45723	2.74581	0.00468342	0.213769	RCAN2	6	46220736	46491972	-	3712	protein_coding	regulator of calcineurin 2 [Source:HGNC Symbol;Acc:HGNC:3041]	-	97	34	1.10099	0.41683
ENSG00000185499	-1.7678	3.40533	0.00468829	0.213769	MUC1	1	155185824	155192916	-	4717	protein_coding	mucin 1, cell surface associated [Source:HGNC Symbol;Acc:HGNC:7508]	-	13	43	0.116117	0.414849
ENSG00000154269	-1.7678	3.40533	0.00468829	0.213769	ENPP3	6	131628442	131747418	+	3885	protein_coding	ectonucleotide pyrophosphatase/phosphodiesterase 3 [Source:HGNC Symbol;Acc:HGNC:3358]	-	13	43	0.140984	0.503692
ENSG00000234290	-1.7678	3.40533	0.00468829	0.213769	AC116366.1	5	132468890	132473043	-	3730	antisense	novel transcript	-	13	43	0.146843	0.524623
ENSG00000113739	-1.19033	2.28205	0.00469924	0.213887	STC2	5	173314713	173329503	-	6128	protein_coding	stanniocalcin 2 [Source:HGNC Symbol;Acc:HGNC:11374]	-	749	1649	5.14969	12.2459
ENSG00000242294	-1.32001	2.49668	0.0047322	0.215004	STAG3L5P	7	100336079	100351900	+	2804	transcribed_unprocessed_pseudogene	stromal antigen 3-like 5 pseudogene [Source:HGNC Symbol;Acc:HGNC:48896]	-	73	176	1.09689	2.85642
ENSG00000178852	-1.63035	3.09588	0.00476466	0.216094	EFCAB13	17	47323290	47441312	+	6672	protein_coding	EF-hand calcium binding domain 13 [Source:HGNC Symbol;Acc:HGNC:26864]	-	19	57	0.119982	0.388782
ENSG00000273018	-1.27531	2.4205	0.00479898	0.217223	FAM106A	17	18511221	18551705	-	9984	processed_transcript	family with sequence similarity 106 member A [Source:NCBI gene;Acc:80039]	-	98	229	0.413561	1.0438
ENSG00000153233	-1.40922	2.65594	0.00481636	0.217223	PTPRR	12	70638073	70920843	-	5142	protein_coding	protein tyrosine phosphatase, receptor type R [Source:HGNC Symbol;Acc:HGNC:9680]	-	37	95	0.303171	0.840774
ENSG00000198944	2.56283	5.90865	0.00484911	0.217223	SOWAHA	5	132813587	132816797	+	3211	protein_coding	sosondowah ankyrin repeat domain family member A [Source:HGNC Symbol;Acc:HGNC:27033]	-	19	3	0.249305	0.0425176
ENSG00000205129	-2.66424	6.33891	0.00484911	0.217223	C4orf47	4	185426249	185449826	+	1366	protein_coding	chromosome 4 open reading frame 47 [Source:HGNC Symbol;Acc:HGNC:34346]	-	3	19	0.0925312	0.632981
ENSG00000168135	2.56283	5.90865	0.00484911	0.217223	KCNJ4	22	38426327	38455199	-	2065	protein_coding	potassium voltage-gated channel subfamily J member 4 [Source:HGNC Symbol;Acc:HGNC:6265]	-	19	3	0.38766	0.0661133
ENSG00000238390	-2.66424	6.33891	0.00484911	0.217223	RF01241	21	31664306	31664482	+	177	snoRNA		-	3	19	0.714111	4.88504
ENSG00000274093	-2.66424	6.33891	0.00484911	0.217223	AC009032.1	16	69632141	69632571	+	431	sense_intronic	novel transcript, sense intronic to NFAT5	-	3	19	0.293266	2.00615
ENSG00000277290	-1.39203	2.62448	0.00486701	0.217643	AC136475.10	11	243099	243483	-	385	processed_pseudogene	signal recognition particle 19kDa (SRP19) pseudogene	-	41	104	4.48684	12.2931
ENSG00000164707	-1.82847	3.55159	0.00491367	0.218963	SLC13A4	7	135681237	135729258	-	8015	protein_coding	solute carrier family 13 member 4 [Source:HGNC Symbol;Acc:HGNC:15827]	-	11	38	0.0578238	0.215758
ENSG00000204176	1.79916	3.48017	0.00491367	0.218963	SYT15	10	46578217	46594173	+	7158	protein_coding	synaptotagmin 15 [Source:HGNC Symbol;Acc:HGNC:17167]	-	40	11	0.235443	0.0699341
ENSG00000241494	-1.18763	2.27778	0.00493902	0.219537	AL355032.1	14	101677943	101678380	+	438	processed_pseudogene	ribosomal protein L26-like 1 (RPL26L1) pseudogene	-	572	1257	55.0224	130.602
ENSG00000152315	1.50701	2.8422	0.00494375	0.219537	KCNK13	14	90061765	90185857	+	2522	protein_coding	potassium two pore domain channel subfamily K member 13 [Source:HGNC Symbol;Acc:HGNC:6275]	-	68	23	1.13601	0.415021
ENSG00000276449	1.68663	3.21904	0.00501982	0.221278	AC004076.2	19	57449689	57453011	+	3323	antisense	novel transcript	-	47	14	0.595916	0.191728
ENSG00000197417	1.30202	2.46574	0.00507025	0.221278	SHPK	17	3608262	3636322	-	3838	protein_coding	sedoheptulokinase [Source:HGNC Symbol;Acc:HGNC:1492]	-	174	68	1.91013	0.806291
ENSG00000149922	-1.44061	2.71436	0.00512701	0.221278	TBX6	16	30085793	30091887	-	3137	protein_coding	T-box 6 [Source:HGNC Symbol;Acc:HGNC:11605]	T-box	32	84	0.429787	1.21858
ENSG00000213988	-1.91148	3.76195	0.00512978	0.221278	ZNF90	19	20077994	20127076	+	5017	protein_coding	zinc finger protein 90 [Source:HGNC Symbol;Acc:HGNC:13165]	zf-C2H2	9	33	0.0755816	0.299335
ENSG00000198221	-1.91148	3.76195	0.00512978	0.221278	AFDN-DT	6	167823876	167826709	-	2362	lincRNA	AFDN divergent transcript [Source:HGNC Symbol;Acc:HGNC:21236]	-	9	33	0.160539	0.635802
ENSG00000261794	-1.91148	3.76195	0.00512978	0.221278	GOLGA8H	15	30604126	30614561	+	1899	protein_coding	golgin A8 family member H [Source:HGNC Symbol;Acc:HGNC:37443]	-	9	33	0.19968	0.790818
ENSG00000259933	-1.91148	3.76195	0.00512978	0.221278	AC009065.2	16	2091436	2095433	+	691	sense_overlapping	uncharacterized LOC105371049 [Source:NCBI gene;Acc:105371049]	-	9	33	0.54876	2.17332
ENSG00000116260	1.16739	2.24606	0.00513508	0.221278	QSOX1	1	180154834	180204030	+	9311	protein_coding	quiescin sulfhydryl oxidase 1 [Source:HGNC Symbol;Acc:HGNC:9756]	-	5055	2171	22.874	10.6109
ENSG00000279377	-1.58452	2.99907	0.00522492	0.221278	AC003973.3	19	21965708	21968529	-	2822	TEC	TEC	-	21	61	0.313531	0.983695
ENSG00000215252	-1.19266	2.28575	0.00524526	0.221278	GOLGA8B	15	34525207	34588503	-	7670	protein_coding	golgin A8 family member B [Source:HGNC Symbol;Acc:HGNC:31973]	-	331	730	1.81824	4.33127
ENSG00000198734	-2.97395	7.85684	0.00524731	0.221278	F5	1	169514166	169586588	-	7158	protein_coding	coagulation factor V [Source:HGNC Symbol;Acc:HGNC:3542]	-	2	16	0.0117722	0.101722
ENSG00000149294	-2.97395	7.85684	0.00524731	0.221278	NCAM1	11	112961247	113278436	+	12737	protein_coding	neural cell adhesion molecule 1 [Source:HGNC Symbol;Acc:HGNC:7656]	-	2	16	0.00661577	0.0571664
ENSG00000103528	-2.97395	7.85684	0.00524731	0.221278	SYT17	16	19167971	19268334	+	7538	protein_coding	synaptotagmin 17 [Source:HGNC Symbol;Acc:HGNC:24119]	-	2	16	0.0111787	0.0965943
ENSG00000233589	-2.97395	7.85684	0.00524731	0.221278	AL138789.1	1	68479129	68483539	+	960	antisense	novel transcript	-	2	16	0.0877762	0.758467
ENSG00000166664	2.87358	7.32882	0.00524731	0.221278	CHRFAM7A	15	30357766	30393849	-	6837	protein_coding	CHRNA7 (exons 5-10) and FAM7A (exons A-E) fusion [Source:HGNC Symbol;Acc:HGNC:15781]	-	16	2	0.0985989	0.0133123
ENSG00000091536	-2.97395	7.85684	0.00524731	0.221278	MYO15A	17	18108706	18179806	+	20002	protein_coding	myosin XVA [Source:HGNC Symbol;Acc:HGNC:7594]	-	2	16	0.00421283	0.0364028
ENSG00000152785	2.87358	7.32882	0.00524731	0.221278	BMP3	4	81030965	81057531	+	5734	protein_coding	bone morphogenetic protein 3 [Source:HGNC Symbol;Acc:HGNC:1070]	-	16	2	0.117566	0.015873
ENSG00000275441	-2.97395	7.85684	0.00524731	0.221278	AC020765.2	16	28553709	28554140	-	432	antisense	novel transcript, antisense to CCDC101	-	2	16	0.195058	1.68548
ENSG00000257534	-2.97395	7.85684	0.00524731	0.221278	AC023794.4	12	54162065	54164452	-	754	lincRNA	novel transcript	-	2	16	0.111757	0.965687
ENSG00000225891	2.87358	7.32882	0.00524731	0.221278	AL513365.2	1	26462756	26467282	-	529	antisense	uncharacterized LOC101928324 [Source:NCBI gene;Acc:101928324]	-	16	2	1.27433	0.172053
ENSG00000268743	-2.97395	7.85684	0.00524731	0.221278	AC008737.1	19	16844025	16846473	+	371	sense_intronic	novel transcript, sense intronic SIN3B	-	2	16	0.22713	1.96261
ENSG00000236140	-2.97395	7.85684	0.00524731	0.221278	AC245014.1	1	145286610	145287755	-	381	lincRNA	novel transcript	-	2	16	0.221168	1.9111
ENSG00000224189	-3.5931	12.0679	0.00528154	0.221278	HAGLR	2	176164051	176188958	-	5110	antisense	HOXD antisense growth-associated long non-coding RNA [Source:HGNC Symbol;Acc:HGNC:43755]	-	1	13	0.00824512	0.115774
ENSG00000262943	-3.5931	12.0679	0.00528154	0.221278	ALOX12P2	17	6853861	6954107	+	5655	transcribed_unprocessed_pseudogene	arachidonate 12-lipoxygenase pseudogene 2 [Source:HGNC Symbol;Acc:HGNC:432]	-	1	13	0.0074505	0.104616
ENSG00000224550	-3.5931	12.0679	0.00528154	0.221278	AC114491.1	1	107505203	107505448	+	246	processed_pseudogene	NADH dehydrogenase (ubiquinone) 1 alpha subcomplex, 4, 9kDa (NDUFA4) pseudogene	-	1	13	0.171271	2.40489
ENSG00000267681	-3.5931	12.0679	0.00528154	0.221278	AC135721.1	17	43144956	43145255	+	300	transcribed_processed_pseudogene	high mobility group nucleosome binding domain 1 (HMGN1) pseudogene	-	1	13	0.140442	1.97201
ENSG00000265010	-3.5931	12.0679	0.00528154	0.221278	AC087301.1	17	73243093	73244706	+	321	sense_intronic	novel transcript, sense intronic to C17orf80	-	1	13	0.131254	1.843
ENSG00000255234	-3.5931	12.0679	0.00528154	0.221278	AP000446.1	11	83286128	83423516	+	2845	antisense	novel transcript, antisense to CCDC90B	-	1	13	0.0148093	0.207945
ENSG00000222031	-3.5931	12.0679	0.00528154	0.221278	AC023469.1	2	151001220	151048774	-	469	lincRNA	novel transcript	-	1	13	0.0898349	1.26142
ENSG00000285958	-3.5931	12.0679	0.00528154	0.221278	AC073174.2	10	52946431	52955585	-	6744	lincRNA	novel transcript	-	1	13	0.00624741	0.087723
ENSG00000260075	-2.28605	4.87719	0.00528628	0.221278	NSFP1	17	46372855	46487141	+	1471	unprocessed_pseudogene	N-ethylmaleimide-sensitive factor pseudogene 1 [Source:HGNC Symbol;Acc:HGNC:31405]	-	5	24	0.143211	0.742483
ENSG00000249963	-2.28605	4.87719	0.00528628	0.221278	EEF1A1P20	5	99996547	99997932	+	1386	processed_pseudogene	eukaryotic translation elongation factor 1 alpha 1 pseudogene 20 [Source:HGNC Symbol;Acc:HGNC:37893]	-	5	24	0.151993	0.788017
ENSG00000279837	-2.28605	4.87719	0.00528628	0.221278	AC112694.2	11	18601882	18602649	+	768	TEC	novel transcript	-	5	24	0.274301	1.42212
ENSG00000259434	-2.28605	4.87719	0.00528628	0.221278	AC068875.1	15	37365027	37490808	-	463	lincRNA	novel transcript	-	5	24	0.454995	2.35895
ENSG00000260337	-2.28605	4.87719	0.00528628	0.221278	AC091544.4	15	92592574	92596462	-	3889	processed_transcript	novel transcript	-	5	24	0.0541689	0.280841
ENSG00000232546	-1.62999	3.0951	0.00529608	0.221326	AC027644.1	7	66848496	66858136	+	298	unprocessed_pseudogene	pseudogene similar to part of general transcription factor II, i (GTF2I)	-	18	54	2.54492	8.24642
ENSG00000232931	-1.47624	2.78222	0.00533402	0.222294	LINC00342	2	95807118	95816215	-	2618	lincRNA	long intergenic non-protein coding RNA 342 [Source:HGNC Symbol;Acc:HGNC:42470]	-	26	70	0.418429	1.21679
ENSG00000169203	-1.69119	3.22922	0.00533667	0.222294	NPIPB12	16	29483642	29505999	-	4331	protein_coding	nuclear pore complex interacting protein family, member B12 [Source:HGNC Symbol;Acc:HGNC:37491]	-	15	47	0.145922	0.493853
ENSG00000164294	-1.19442	2.28853	0.00535302	0.222612	GPX8	5	55160118	55167071	+	3868	protein_coding	glutathione peroxidase 8 (putative) [Source:HGNC Symbol;Acc:HGNC:33100]	-	293	647	3.19153	7.61212
ENSG00000266714	-1.18469	2.27314	0.00537145	0.222787	MYO15B	17	75588058	75626501	+	12761	protein_coding	myosin XVB [Source:HGNC Symbol;Acc:HGNC:14083]	-	383	840	1.26454	2.99559
ENSG00000145425	-1.15681	2.22965	0.00538	0.222787	RPS3A	4	151099573	151104652	+	2341	protein_coding	ribosomal protein S3A [Source:HGNC Symbol;Acc:HGNC:10421]	-	20961	45084	377.249	876.413
ENSG00000263006	-1.30964	2.4788	0.00538338	0.222787	ROCK1P1	18	109065	122219	+	2645	transcribed_unprocessed_pseudogene	Rho associated coiled-coil containing protein kinase 1 pseudogene 1 [Source:HGNC Symbol;Acc:HGNC:37832]	-	66	158	1.05132	2.71844
ENSG00000168970	-1.246	2.37182	0.00539755	0.223011	JMJD7-PLA2G4B	15	41828095	41848155	+	7862	protein_coding	JMJD7-PLA2G4B readthrough [Source:HGNC Symbol;Acc:HGNC:34449]	-	114	261	0.610927	1.51076
ENSG00000256673	-1.37116	2.58679	0.00544399	0.224567	AC141557.1	12	9398355	9414851	-	400	unprocessed_pseudogene	ovostatin (OVOS) pseudogene	-	42	105	4.42392	11.9458
ENSG00000106133	-1.43384	2.70165	0.00555752	0.228702	NSUN5P2	7	72947581	72954790	-	2576	transcribed_unprocessed_pseudogene	NOP2/Sun RNA methyltransferase family member 5 pseudogene 2 [Source:HGNC Symbol;Acc:HGNC:16609]	-	31	81	0.50703	1.43096
ENSG00000261556	-1.39511	2.63009	0.00557111	0.228702	SMG1P7	16	70219574	70246610	-	4433	transcribed_unprocessed_pseudogene	SMG1 pseudogene 7 [Source:HGNC Symbol;Acc:HGNC:49864]	-	35	89	0.33265	0.91365
ENSG00000237886	-1.39511	2.63009	0.00557111	0.228702	NALT1	9	136546212	136549893	+	1088	antisense	NOTCH1 associated lncRNA in T cell acute lymphoblastic leukemia 1 [Source:HGNC Symbol;Acc:HGNC:51192]	-	35	89	1.35537	3.72262
ENSG00000250510	-1.84608	3.59521	0.00561466	0.229751	GPR162	12	6821545	6829972	+	3295	protein_coding	G protein-coupled receptor 162 [Source:HGNC Symbol;Acc:HGNC:16693]	-	10	35	0.127868	0.483393
ENSG00000231742	-1.84608	3.59521	0.00561466	0.229751	LINC01273	20	50172550	50176671	+	894	lincRNA	long intergenic non-protein coding RNA 1273 [Source:HGNC Symbol;Acc:HGNC:50329]	-	10	35	0.471281	1.78163
ENSG00000130164	1.15998	2.23454	0.00574755	0.234813	LDLR	19	11089362	11133816	+	7718	protein_coding	low density lipoprotein receptor [Source:HGNC Symbol;Acc:HGNC:6547]	-	1983	856	10.8252	5.04727
ENSG00000206530	-1.33658	2.52551	0.00586348	0.239166	CFAP44	3	113286947	113441610	-	12143	protein_coding	cilia and flagella associated protein 44 [Source:HGNC Symbol;Acc:HGNC:25631]	-	50	122	0.173485	0.457216
ENSG00000272894	-1.34611	2.54226	0.00590383	0.23999	AC004982.2	7	7552462	7566996	-	1730	lincRNA	novel transcript	-	46	113	1.12029	2.97249
ENSG00000234614	-1.98904	3.96973	0.00591186	0.23999	AL450992.2	1	151841877	151850385	+	506	antisense	novel transcript, antisense to THEM5	-	8	31	0.666127	2.78804
ENSG00000280388	-1.98904	3.96973	0.00591186	0.23999	AC006330.1	7	76043977	76045963	-	1987	TEC	TEC	-	8	31	0.169633	0.709989
ENSG00000064989	-1.62958	3.09424	0.00592786	0.240257	CALCRL	2	187343129	187448460	-	6144	protein_coding	calcitonin receptor like receptor [Source:HGNC Symbol;Acc:HGNC:16709]	-	17	51	0.116578	0.377752
ENSG00000223891	-1.22933	2.34457	0.00604151	0.243813	OSER1-DT	20	44210960	44226027	+	2186	lincRNA	OSER1 divergent transcript [Source:HGNC Symbol;Acc:HGNC:48585]	-	114	258	2.19721	5.37103
ENSG00000114670	-1.42659	2.6881	0.00604755	0.243813	NEK11	3	131026850	131350465	+	5355	protein_coding	NIMA related kinase 11 [Source:HGNC Symbol;Acc:HGNC:18593]	-	30	78	0.236037	0.662862
ENSG00000270605	-1.22615	2.33942	0.00605826	0.243813	AL353622.1	1	28239509	28241453	-	1945	antisense	novel transcript	-	124	280	2.68609	6.55128
ENSG00000167619	-1.79012	3.45843	0.00606867	0.243813	TMEM145	19	42313325	42325062	+	2640	protein_coding	transmembrane protein 145 [Source:HGNC Symbol;Acc:HGNC:26912]	-	11	37	0.175552	0.637801
ENSG00000161031	-2.40746	5.30538	0.00607288	0.243813	PGLYRP2	19	15468645	15498956	-	3188	protein_coding	peptidoglycan recognition protein 2 [Source:HGNC Symbol;Acc:HGNC:30013]	-	4	21	0.0528639	0.29977
ENSG00000235527	-2.40746	5.30538	0.00607288	0.243813	HIPK1-AS1	1	113924000	113929492	-	3087	antisense	HIPK1 antisense RNA 1 [Source:HGNC Symbol;Acc:HGNC:50576]	-	4	21	0.0545935	0.309578
ENSG00000117616	-1.18625	2.27561	0.00610656	0.24478	RSRP1	1	25242237	25338213	-	6804	protein_coding	arginine and serine rich protein 1 [Source:HGNC Symbol;Acc:HGNC:25234]	-	240	527	1.48616	3.5248
ENSG00000119699	-2.14391	4.41957	0.00612771	0.244859	TGFB3	14	75958099	75982991	-	4914	protein_coding	transforming growth factor beta 3 [Source:HGNC Symbol;Acc:HGNC:11769]	-	6	26	0.0514439	0.240783
ENSG00000241362	-2.14391	4.41957	0.00612771	0.244859	RPL36AP43	15	89687937	89688243	-	307	processed_pseudogene	ribosomal protein L36a pseudogene 43 [Source:HGNC Symbol;Acc:HGNC:36791]	-	6	26	0.823438	3.8541
ENSG00000141682	-1.18491	2.2735	0.00615063	0.245187	PMAIP1	18	59899948	59904306	+	2235	protein_coding	phorbol-12-myristate-13-acetate-induced protein 1 [Source:HGNC Symbol;Acc:HGNC:9108]	-	227	498	4.27924	10.14
ENSG00000156042	-1.20521	2.30571	0.00615513	0.245187	CFAP70	10	73253759	73358859	-	7428	protein_coding	cilia and flagella associated protein 70 [Source:HGNC Symbol;Acc:HGNC:30726]	-	142	316	0.805442	1.93599
ENSG00000245849	-1.20324	2.30256	0.00619607	0.246434	RAD51-AS1	15	40686243	40695107	-	2177	processed_transcript	RAD51 antisense RNA 1 [Source:HGNC Symbol;Acc:HGNC:48621]	-	153	340	2.96108	7.10736
ENSG00000089356	-1.54121	2.91038	0.006253	0.248311	FXYD3	19	35115879	35124324	+	3334	protein_coding	FXYD domain containing ion transport regulator 3 [Source:HGNC Symbol;Acc:HGNC:4027]	-	22	62	0.278019	0.846279
ENSG00000135253	-1.66024	3.16069	0.00637015	0.252159	KCP	7	128862451	128910719	-	8259	protein_coding	kielin/chordin-like protein [Source:HGNC Symbol;Acc:HGNC:17585]	-	15	46	0.0765212	0.253465
ENSG00000175471	1.28204	2.43182	0.00637525	0.252159	MCTP1	5	94703741	95284575	-	12089	protein_coding	multiple C2 and transmembrane domain containing 1 [Source:HGNC Symbol;Acc:HGNC:26183]	-	159	63	0.554146	0.237158
ENSG00000139044	1.24359	2.36788	0.00637953	0.252159	B4GALNT3	12	460364	563509	+	6867	protein_coding	beta-1,4-N-acetyl-galactosaminyltransferase 3 [Source:HGNC Symbol;Acc:HGNC:24137]	-	226	92	1.38663	0.609689
ENSG00000137709	-1.43026	2.69496	0.00643045	0.253689	POU2F3	11	120236640	120319944	+	6645	protein_coding	POU class 2 homeobox 3 [Source:HGNC Symbol;Acc:HGNC:19864]	Pou	28	73	0.177534	0.499937
ENSG00000172638	-1.36299	2.57218	0.00644802	0.253689	EFEMP2	11	65866441	65873592	-	5397	protein_coding	EGF containing fibulin extracellular matrix protein 2 [Source:HGNC Symbol;Acc:HGNC:3219]	-	37	92	0.288847	0.775752
ENSG00000185272	-1.36299	2.57218	0.00644802	0.253689	RBM11	21	14216130	14228372	+	2360	protein_coding	RNA binding motif protein 11 [Source:HGNC Symbol;Acc:HGNC:9897]	-	37	92	0.660553	1.77404
ENSG00000276529	1.71047	3.27266	0.00649311	0.254287	AP001505.1	21	44978832	44979274	+	443	lincRNA	novel transcript	-	41	12	3.8994	1.23272
ENSG00000152086	-1.74167	3.34421	0.00649311	0.254287	TUBA3E	2	130191743	130198461	-	1542	protein_coding	tubulin alpha 3e [Source:HGNC Symbol;Acc:HGNC:20765]	-	12	39	0.32788	1.15098
ENSG00000205038	-1.74167	3.34421	0.00649311	0.254287	PKHD1L1	8	109362477	109530330	+	13728	protein_coding	PKHD1 like 1 [Source:HGNC Symbol;Acc:HGNC:20313]	-	12	39	0.0368292	0.129284
ENSG00000178498	-1.27281	2.41632	0.00652692	0.254757	DTX3	12	57604622	57609804	+	4087	protein_coding	deltex E3 ubiquitin ligase 3 [Source:HGNC Symbol;Acc:HGNC:24457]	-	72	168	0.742242	1.87065
ENSG00000138166	-1.39639	2.63242	0.00652898	0.254757	DUSP5	10	110497838	110511544	+	2615	protein_coding	dual specificity phosphatase 5 [Source:HGNC Symbol;Acc:HGNC:3071]	-	33	84	0.531692	1.46182
ENSG00000134419	-1.13091	2.18996	0.00657818	0.254757	RPS15A	16	18781295	18790383	-	6679	protein_coding	ribosomal protein S15a [Source:HGNC Symbol;Acc:HGNC:10389]	-	3881	8199	24.4822	55.8647
ENSG00000139438	1.20635	2.30754	0.00658105	0.254757	FAM222A	12	109714228	109770507	+	3722	protein_coding	family with sequence similarity 222 member A [Source:HGNC Symbol;Acc:HGNC:25915]	-	292	122	3.3054	1.49166
ENSG00000259768	-1.26248	2.39907	0.00665406	0.254757	AC004943.2	16	72665170	72791624	+	4842	antisense	novel transcript, antisense to ZFHX3	-	79	183	0.687417	1.71994
ENSG00000005513	1.44593	2.72438	0.00667698	0.254757	SOX8	16	981808	986979	+	4432	protein_coding	SRY-box 8 [Source:HGNC Symbol;Acc:HGNC:11203]	HMG	68	24	0.646438	0.246433
ENSG00000166596	-1.44781	2.72793	0.00667698	0.254757	CFAP52	17	9576627	9643459	+	3078	protein_coding	cilia and flagella associated protein 52 [Source:HGNC Symbol;Acc:HGNC:16053]	-	25	66	0.342207	0.975805
ENSG00000082196	-1.29671	2.45668	0.00671175	0.254757	C1QTNF3	5	34019448	34043832	-	3576	protein_coding	C1q and TNF related 3 [Source:HGNC Symbol;Acc:HGNC:14326]	-	59	140	0.69514	1.78163
ENSG00000149150	-1.15577	2.22804	0.00674767	0.254757	SLC43A1	11	57484534	57515786	-	3532	protein_coding	solute carrier family 43 member 1 [Source:HGNC Symbol;Acc:HGNC:9225]	-	354	761	4.2228	9.80509
ENSG00000046651	-1.17242	2.25389	0.00681313	0.254757	OFD1	X	13734745	13769353	+	5172	protein_coding	OFD1, centriole and centriolar satellite protein [Source:HGNC Symbol;Acc:HGNC:2567]	-	200	435	1.62926	3.82753
ENSG00000168209	-1.13634	2.19822	0.00688438	0.254757	DDIT4	10	72273920	72276036	+	2058	protein_coding	DNA damage inducible transcript 4 [Source:HGNC Symbol;Acc:HGNC:24944]	-	704	1493	14.4127	33.0143
ENSG00000113721	-1.69928	3.2474	0.00688961	0.254757	PDGFRB	5	150113837	150155872	-	7137	protein_coding	platelet derived growth factor receptor beta [Source:HGNC Symbol;Acc:HGNC:8804]	-	13	41	0.0767442	0.26143
ENSG00000223519	-2.03223	4.09037	0.00689176	0.254757	KIF28P	1	246771837	246839611	-	3525	transcribed_unitary_pseudogene	kinesin family member 28, pseudogene [Source:HGNC Symbol;Acc:HGNC:49205]	-	7	28	0.0836675	0.361482
ENSG00000102878	-1.16791	2.24685	0.00691358	0.254757	HSF4	16	67164681	67169945	+	3377	protein_coding	heat shock transcription factor 4 [Source:HGNC Symbol;Acc:HGNC:5227]	HSF	232	503	2.89451	6.77836
ENSG00000186301	-1.53652	2.90094	0.00695566	0.254757	MST1P2	1	16645622	16650289	+	2291	unprocessed_pseudogene	macrophage stimulating 1 pseudogene 2 [Source:HGNC Symbol;Acc:HGNC:7383]	-	21	59	0.3862	1.17196
ENSG00000267454	-1.53652	2.90094	0.00695566	0.254757	ZNF582-AS1	19	56393656	56399172	+	2037	lincRNA	ZNF582 antisense RNA 1 (head to head) [Source:HGNC Symbol;Acc:HGNC:25213]	-	21	59	0.434356	1.3181
ENSG00000204173	-2.58675	6.00743	0.00696616	0.254757	LRRC37A5P	9	111602831	111631289	-	2324	transcribed_unprocessed_pseudogene	leucine rich repeat containing 37 member A5, pseudogene [Source:HGNC Symbol;Acc:HGNC:23369]	-	3	18	0.054388	0.352472
ENSG00000235319	-2.58675	6.00743	0.00696616	0.254757	AC012360.1	2	105324210	105330529	+	674	lincRNA	novel transcript	-	3	18	0.187534	1.21535
ENSG00000250794	-2.58675	6.00743	0.00696616	0.254757	ALG1L12P	8	12421032	12425000	+	434	unprocessed_pseudogene	asparagine-linked glycosylation 1-like 12, pseudogene [Source:HGNC Symbol;Acc:HGNC:44381]	-	3	18	0.291239	1.88743
ENSG00000273381	-2.58675	6.00743	0.00696616	0.254757	AL158071.4	9	91206175	91210299	-	4125	lincRNA	novel transcript	-	3	18	0.0306419	0.19858
ENSG00000258984	-2.58675	6.00743	0.00696616	0.254757	UBE2F-SCLY	2	237967014	238099412	+	3195	protein_coding	UBE2F-SCLY readthrough (NMD candidate) [Source:HGNC Symbol;Acc:HGNC:48339]	-	3	18	0.0395611	0.256383
ENSG00000270903	-2.58675	6.00743	0.00696616	0.254757	HNRNPA3P9	11	32591793	32592771	-	979	processed_pseudogene	heterogeneous nuclear ribonucleoprotein A3 pseudogene 9 [Source:HGNC Symbol;Acc:HGNC:48755]	-	3	18	0.129109	0.836715
ENSG00000235513	-2.58675	6.00743	0.00696616	0.254757	AL035681.1	22	41209122	41217627	-	2500	antisense	novel transcript, antisense to L3MBTL2	-	3	18	0.0505591	0.327658
ENSG00000273812	-1.60108	3.03371	0.0069849	0.254757	BX640514.2	20	62596732	62603115	-	625	lincRNA	novel transcript	-	17	50	1.14601	3.64064
ENSG00000006611	-1.8044	3.49285	0.00701327	0.254757	USH1C	11	17493895	17544416	-	4904	protein_coding	USH1 protein network component harmonin [Source:HGNC Symbol;Acc:HGNC:12597]	-	10	34	0.0859147	0.315512
ENSG00000124391	-1.8044	3.49285	0.00701327	0.254757	IL17C	16	88638591	88640473	+	1379	protein_coding	interleukin 17C [Source:HGNC Symbol;Acc:HGNC:5983]	-	10	34	0.30553	1.12202
ENSG00000254694	-1.8044	3.49285	0.00701327	0.254757	AP001893.1	11	126208611	126209027	-	362	antisense	novel transcript	-	10	34	1.16388	4.27423
ENSG00000197457	1.20299	2.30216	0.00703609	0.254757	STMN3	20	63639705	63657682	-	3032	protein_coding	stathmin 3 [Source:HGNC Symbol;Acc:HGNC:15926]	-	277	116	3.84918	1.74107
ENSG00000268869	-1.38822	2.61756	0.00710677	0.254757	ESPNP	1	16687339	16720157	-	3178	transcribed_unprocessed_pseudogene	espin pseudogene [Source:HGNC Symbol;Acc:HGNC:23285]	-	32	81	0.424242	1.1599
ENSG00000223396	-1.18331	2.27097	0.00711447	0.254757	RPS10P7	1	201518703	201584367	+	3018	transcribed_processed_pseudogene	ribosomal protein S10 pseudogene 7 [Source:HGNC Symbol;Acc:HGNC:36423]	-	146	320	2.03822	4.82523
ENSG00000236432	-2.22497	4.67501	0.00716778	0.254757	AC097662.1	2	227221052	227325201	-	3652	antisense	uncharacterized LOC654841 [Source:NCBI gene;Acc:654841]	-	5	23	0.0576842	0.286606
ENSG00000279689	-2.22497	4.67501	0.00716778	0.254757	AC022400.8	10	73769264	73772862	-	3599	TEC	TEC	-	5	23	0.0585337	0.290826
ENSG00000272263	-2.22497	4.67501	0.00716778	0.254757	AC034198.2	3	12832219	12832728	-	510	antisense	novel transcript, antisense to CAND2	-	5	23	0.413064	2.05232
ENSG00000263089	-2.22497	4.67501	0.00716778	0.254757	AC007114.2	17	57092145	57096425	-	4281	antisense	novel transcript, antisense to AKAP1	-	5	23	0.0492088	0.244495
ENSG00000120075	-1.5178	2.86353	0.00718394	0.254757	HOXB5	17	48591257	48593961	-	2041	protein_coding	homeobox B5 [Source:HGNC Symbol;Acc:HGNC:5116]	Homeobox	22	61	0.454148	1.36011
ENSG00000132563	-6.21566	74.319	0.00724341	0.254757	REEP2	5	138439017	138446969	+	3284	protein_coding	receptor accessory protein 2 [Source:HGNC Symbol;Acc:HGNC:17975]	-	0	9	0	0.124717
ENSG00000143869	-6.21566	74.319	0.00724341	0.254757	GDF7	2	20666664	20679245	+	9749	protein_coding	growth differentiation factor 7 [Source:HGNC Symbol;Acc:HGNC:4222]	-	0	9	0	0.0420117
ENSG00000100505	-6.21566	74.319	0.00724341	0.254757	TRIM9	14	50975262	51096061	-	8945	protein_coding	tripartite motif containing 9 [Source:HGNC Symbol;Acc:HGNC:16288]	-	0	9	0	0.0457878
ENSG00000108576	-6.21566	74.319	0.00724341	0.254757	SLC6A4	17	30194319	30236002	-	6983	protein_coding	solute carrier family 6 member 4 [Source:HGNC Symbol;Acc:HGNC:11050]	-	0	9	0	0.0586527
ENSG00000204179	-6.21566	74.319	0.00724341	0.254757	PTPN20	10	46911396	47002488	+	4506	protein_coding	protein tyrosine phosphatase, non-receptor type 20 [Source:HGNC Symbol;Acc:HGNC:23423]	-	0	9	0	0.0908948
ENSG00000180739	-6.21566	74.319	0.00724341	0.254757	S1PR5	19	10512742	10517931	-	2806	protein_coding	sphingosine-1-phosphate receptor 5 [Source:HGNC Symbol;Acc:HGNC:14299]	-	0	9	0	0.145963
ENSG00000213700	-6.21566	74.319	0.00724341	0.254757	RPL17P50	10	73005833	73006595	-	546	processed_pseudogene	ribosomal protein L17 pseudogene 50 [Source:HGNC Symbol;Acc:HGNC:45098]	-	0	9	0	0.750132
ENSG00000178342	6.16446	71.7277	0.00724341	0.254757	KCNG2	18	79863668	79900184	+	2162	protein_coding	potassium voltage-gated channel modifier subfamily G member 2 [Source:HGNC Symbol;Acc:HGNC:6249]	-	9	0	0.17539	0
ENSG00000237614	-6.21566	74.319	0.00724341	0.254757	AC073257.2	2	120542909	120544326	-	528	lincRNA	novel transcript	-	0	9	0	0.775704
ENSG00000228613	-6.21566	74.319	0.00724341	0.254757	AC141930.1	2	1546665	1620113	-	786	antisense	novel transcript	-	0	9	0	0.521084
ENSG00000257524	-6.21566	74.319	0.00724341	0.254757	AL157935.2	9	127867850	127906022	-	3815	protein_coding	novel transcript	-	0	9	0	0.107358
ENSG00000179066	-6.21566	74.319	0.00724341	0.254757	AC020907.1	19	35090930	35113664	+	3099	lincRNA	novel transcript	-	0	9	0	0.132163
ENSG00000279742	-6.21566	74.319	0.00724341	0.254757	AP000974.1	11	85852557	85854943	-	2387	TEC	TEC	-	0	9	0	0.171584
ENSG00000271002	-6.21566	74.319	0.00724341	0.254757	AC129492.5	17	8199123	8199437	-	315	processed_pseudogene	ribosomal protein L11 (RPL11) pseudogene	-	0	9	0	1.30023
ENSG00000183878	-6.21566	74.319	0.00724341	0.254757	UTY	Y	13248379	13480673	-	9191	protein_coding	ubiquitously transcribed tetratricopeptide repeat containing, Y-linked [Source:HGNC Symbol;Acc:HGNC:12638]	-	0	9	0	0.0445623
ENSG00000260494	-6.21566	74.319	0.00724341	0.254757	AC002310.3	16	30537202	30538231	-	723	unprocessed_pseudogene	ribosomal protein L7 (RPL7) pseudogene	-	0	9	0	0.56649
ENSG00000267055	-6.21566	74.319	0.00724341	0.254757	AC007001.1	7	20096137	20130475	+	670	lincRNA	novel transcript	-	0	9	0	0.611301
ENSG00000233111	-6.21566	74.319	0.00724341	0.254757	RAB1C	9	37636688	37637293	-	606	processed_pseudogene	RAB1C, member RAS oncogene family pseudogene [Source:HGNC Symbol;Acc:HGNC:23683]	-	0	9	0	0.675861
ENSG00000285258	-6.21566	74.319	0.00724341	0.254757	ATXN7	3	63864557	64003462	+	7478	protein_coding	ataxin 7 [Source:NCBI gene;Acc:6314]	-	0	9	0	0.0547703
ENSG00000196844	-6.21566	74.319	0.00724341	0.254757	PATE2	11	125776113	125778819	-	1657	protein_coding	prostate and testis expressed 2 [Source:HGNC Symbol;Acc:HGNC:32249]	-	0	9	0	0.247177
ENSG00000159723	-6.21566	74.319	0.00724341	0.254757	AGRP	16	67482571	67483813	-	764	protein_coding	agouti related neuropeptide [Source:HGNC Symbol;Acc:HGNC:330]	-	0	9	0	0.536089
ENSG00000243243	-6.21566	74.319	0.00724341	0.254757	AC073130.2	7	116237929	116327896	-	917	antisense	novel transcript	-	0	9	0	0.446643
ENSG00000235721	-6.21566	74.319	0.00724341	0.254757	AC013268.3	2	110007675	110010783	+	2324	processed_pseudogene	pseudogene similar to part of zinc finger protein 532 (ZNF532)	-	0	9	0	0.176236
ENSG00000280420	-6.21566	74.319	0.00724341	0.254757	AC005355.2	5	134522613	134523096	-	484	TEC	TEC	-	0	9	0	0.846223
ENSG00000218052	-6.21566	74.319	0.00724341	0.254757	ADAMTS7P4	15	85255369	85330334	-	5516	transcribed_unprocessed_pseudogene	ADAMTS7 pseudogene 4 [Source:HGNC Symbol;Acc:HGNC:49410]	-	0	9	0	0.0742516
ENSG00000233041	-6.21566	74.319	0.00724341	0.254757	PHGR1	15	40351033	40356434	+	941	protein_coding	proline, histidine and glycine rich 1 [Source:HGNC Symbol;Acc:HGNC:37226]	-	0	9	0	0.435252
ENSG00000201492	-6.21566	74.319	0.00724341	0.254757	RNA5SP78	1	229549905	229550022	+	118	rRNA_pseudogene	RNA, 5S ribosomal pseudogene 78 [Source:HGNC Symbol;Acc:HGNC:42855]	-	0	9	0	3.47095
ENSG00000204481	6.16446	71.7277	0.00724341	0.254757	PRAMEF14	1	13342034	13347134	-	2301	protein_coding	PRAME family member 14 [Source:HGNC Symbol;Acc:HGNC:13576]	-	9	0	0.164795	0
ENSG00000228021	6.16446	71.7277	0.00724341	0.254757	AL158835.1	10	125683229	125709677	+	4558	processed_transcript	uncharacterized LOC283038 [Source:NCBI gene;Acc:283038]	-	9	0	0.0831929	0
ENSG00000234707	-6.21566	74.319	0.00724341	0.254757	AC074351.1	7	54759425	54804928	+	481	antisense	uncharacterized LOC100996654 [Source:NCBI gene;Acc:100996654]	-	0	9	0	0.851501
ENSG00000021461	-6.21566	74.319	0.00724341	0.254757	CYP3A43	7	99828013	99866102	+	2637	protein_coding	cytochrome P450 family 3 subfamily A member 43 [Source:HGNC Symbol;Acc:HGNC:17450]	-	0	9	0	0.155317
ENSG00000213994	-6.21566	74.319	0.00724341	0.254757	AL157395.1	10	6197612	6202693	-	438	antisense	novel transcript	-	0	9	0	0.935096
ENSG00000258968	-6.21566	74.319	0.00724341	0.254757	AL049830.4	14	31018446	31018796	+	351	processed_pseudogene	intraflagellar transport 20 homolog (Chlamydomonas) (IFT20) pseudogene	-	0	9	0	1.16687
ENSG00000242307	-6.21566	74.319	0.00724341	0.254757	RPS26P52	16	13922332	13922679	-	348	processed_pseudogene	ribosomal protein S26 pseudogene 52 [Source:HGNC Symbol;Acc:HGNC:36863]	-	0	9	0	1.17693
ENSG00000215512	-6.21566	74.319	0.00724341	0.254757	AP005901.1	18	15307663	15330282	-	2970	transcribed_unprocessed_pseudogene	ankyrin repeat domain 30B pseudogene [Source:NCBI gene;Acc:644669]	-	0	9	0	0.137903
ENSG00000214062	6.16446	71.7277	0.00724341	0.254757	RPL7P17	4	77082403	77083126	-	724	processed_pseudogene	ribosomal protein L7 pseudogene 17 [Source:HGNC Symbol;Acc:HGNC:36116]	-	9	0	0.523747	0
ENSG00000214626	-6.21566	74.319	0.00724341	0.254757	POLR3DP1	10	74654956	74656131	+	1176	processed_pseudogene	RNA polymerase III subunit D pseudogene 1 [Source:HGNC Symbol;Acc:HGNC:45107]	-	0	9	0	0.348275
ENSG00000234394	-6.21566	74.319	0.00724341	0.254757	AL353608.3	9	68306528	68330626	+	5282	lincRNA	novel transcript	-	0	9	0	0.0775411
ENSG00000271268	-6.21566	74.319	0.00724341	0.254757	AC015849.6	17	35861093	35861566	-	474	processed_pseudogene	ribosomal L24 domain containing 1 (RSL24D1) pseudogene	-	0	9	0	0.864076
ENSG00000203814	-1.2282	2.34274	0.00726231	0.25507	HIST2H2BF	1	149782689	149812373	-	3196	protein_coding	histone cluster 2 H2B family member f [Source:HGNC Symbol;Acc:HGNC:24700]	-	84	190	1.10736	2.70542
ENSG00000278704	-1.29095	2.44689	0.00731528	0.256577	BX004987.1	GL000009.2	56140	58376	-	2237	protein_coding		-	55	130	1.03589	2.64463
ENSG00000277075	-1.30069	2.46347	0.0073748	0.25831	HIST1H2AE	6	26216975	26217483	+	509	protein_coding	histone cluster 1 H2A family member e [Source:HGNC Symbol;Acc:HGNC:4724]	-	50	119	4.13876	10.6394
ENSG00000173988	-1.75072	3.36527	0.00749892	0.262298	LRRC63	13	46211943	46277366	+	2677	protein_coding	leucine rich repeat containing 63 [Source:HGNC Symbol;Acc:HGNC:34296]	-	11	36	0.173126	0.611987
ENSG00000170044	1.17927	2.26462	0.00757836	0.26295	ZPLD1	3	102099244	102479841	+	5130	protein_coding	zona pellucida like domain containing 1 [Source:HGNC Symbol;Acc:HGNC:27022]	-	303	129	2.48853	1.14435
ENSG00000214140	-1.94193	3.84218	0.00758204	0.26295	PRCD	17	76527586	76553578	+	5305	protein_coding	photoreceptor disc component [Source:HGNC Symbol;Acc:HGNC:32528]	-	8	30	0.0635364	0.25735
ENSG00000235493	-1.94193	3.84218	0.00758204	0.26295	LINC01967	3	27916774	28059268	-	2798	lincRNA	long intergenic non-protein coding RNA 1967 [Source:HGNC Symbol;Acc:HGNC:52793]	-	8	30	0.120465	0.487934
ENSG00000266783	-1.94193	3.84218	0.00758204	0.26295	AP005136.2	18	2561172	2562220	-	1049	sense_intronic	novel transcript, sense intronic METTL4	-	8	30	0.321316	1.30147
ENSG00000265845	-1.94193	3.84218	0.00758204	0.26295	AC024267.4	17	28926275	28944749	+	996	antisense	uncharacterized LOC101927018 [Source:NCBI gene;Acc:101927018]	-	8	30	0.338414	1.37072
ENSG00000251432	-1.62862	3.09216	0.00760601	0.26295	AC108062.1	4	128292751	128519394	+	3283	lincRNA	uncharacterized LOC100507487 [Source:NCBI gene;Acc:100507487]	-	15	45	0.192503	0.623777
ENSG00000134215	-1.48441	2.79803	0.00761025	0.26295	VAV3	1	107571160	107965144	-	7271	protein_coding	vav guanine nucleotide exchange factor 3 [Source:HGNC Symbol;Acc:HGNC:12659]	-	24	65	0.13907	0.406824
ENSG00000261008	-1.42582	2.68667	0.00761025	0.26295	LINC01572	16	72283301	72665009	-	4752	lincRNA	long intergenic non-protein coding RNA 1572 [Source:HGNC Symbol;Acc:HGNC:51385]	-	25	65	0.221657	0.622479
ENSG00000229896	-1.48441	2.79803	0.00761025	0.26295	AL157373.2	6	12007670	12008856	+	855	lincRNA	novel transcript	-	24	65	1.18267	3.45967
ENSG00000173209	-1.14514	2.21168	0.00762275	0.263026	AHSA2P	2	61177418	61191203	+	9083	transcribed_unitary_pseudogene	activator of HSP90 ATPase homolog 2, pseudogene [Source:HGNC Symbol;Acc:HGNC:20437]	-	291	621	1.34984	3.11136
ENSG00000196739	-1.20361	2.30315	0.00764489	0.263434	COL27A1	9	114155560	114312511	+	13988	protein_coding	collagen type XXVII alpha 1 chain [Source:HGNC Symbol;Acc:HGNC:22986]	-	103	229	0.310241	0.745019
ENSG00000170954	-1.21689	2.32445	0.0077521	0.266768	ZNF415	19	53107879	53133077	-	3780	protein_coding	zinc finger protein 415 [Source:HGNC Symbol;Acc:HGNC:20636]	zf-C2H2	86	193	0.958571	2.32356
ENSG00000260757	-1.41316	2.6632	0.00780939	0.267489	AC093520.1	16	31402565	31404699	+	1767	sense_overlapping	novel transcript	-	26	67	0.619947	1.72554
ENSG00000238105	-1.18756	2.27767	0.00781269	0.267489	GOLGA2P5	12	100156357	100173659	-	10957	transcribed_unprocessed_pseudogene	GOLGA2 pseudogene 5 [Source:HGNC Symbol;Acc:HGNC:25315]	-	126	277	0.484503	1.15047
ENSG00000170454	2.78123	6.87439	0.00786477	0.267489	KRT75	12	52424070	52434525	-	2324	protein_coding	keratin 75 [Source:HGNC Symbol;Acc:HGNC:24431]	-	15	2	0.27194	0.0391635
ENSG00000168490	-2.88157	7.36953	0.00786477	0.267489	PHYHIP	8	22219704	22232341	-	4170	protein_coding	phytanoyl-CoA 2-hydroxylase interacting protein [Source:HGNC Symbol;Acc:HGNC:16865]	-	2	15	0.0202075	0.163698
ENSG00000157765	2.78123	6.87439	0.00786477	0.267489	SLC34A2	4	25648011	25678748	+	5045	protein_coding	solute carrier family 34 member 2 [Source:HGNC Symbol;Acc:HGNC:11020]	-	15	2	0.12527	0.0180408
ENSG00000223685	2.78123	6.87439	0.00786477	0.267489	LINC00571	13	38050817	38143232	-	1183	lincRNA	long intergenic non-protein coding RNA 571 [Source:HGNC Symbol;Acc:HGNC:43721]	-	15	2	0.534225	0.0769366
ENSG00000269846	2.78123	6.87439	0.00786477	0.267489	AL136172.1	20	37095785	37097178	+	1394	antisense	novel transcript, antisense to RBL1	-	15	2	0.453363	0.0652912
ENSG00000237693	-2.88157	7.36953	0.00786477	0.267489	IRGM	5	150846523	150900736	+	2271	protein_coding	immunity related GTPase M [Source:HGNC Symbol;Acc:HGNC:29597]	-	2	15	0.0371049	0.300581
ENSG00000248508	-1.20003	2.29744	0.00786731	0.267489	SRP14-AS1	15	40039311	40067290	+	2992	lincRNA	SRP14 antisense RNA1 (head to head) [Source:HGNC Symbol;Acc:HGNC:48619]	-	101	224	1.42226	3.40702
ENSG00000227477	-1.59884	3.02899	0.00792952	0.269245	STK4-AS1	20	44963794	44966402	-	2065	lincRNA	STK4 antisense RNA 1 (head to head) [Source:HGNC Symbol;Acc:HGNC:43811]	-	16	47	0.326451	1.03578
ENSG00000273711	-1.70431	3.25873	0.00794554	0.269431	AC005520.5	14	73873689	73885555	-	2137	antisense	novel transcript, antisense to PTGR2	-	12	38	0.236589	0.80922
ENSG00000265843	-1.16384	2.24054	0.00806425	0.271875	LINC01029	18	77971294	77993722	-	2094	lincRNA	long intergenic non-protein coding RNA 1029 [Source:HGNC Symbol;Acc:HGNC:49015]	-	154	333	3.09857	7.23694
ENSG00000196109	-1.36168	2.56983	0.00807812	0.271875	ZNF676	19	22179091	22215775	-	3088	protein_coding	zinc finger protein 676 [Source:HGNC Symbol;Acc:HGNC:20429]	zf-C2H2	33	82	0.450251	1.20844
ENSG00000218510	-1.29911	2.46076	0.00808376	0.271875	LINC00339	1	22024558	22031223	+	3764	processed_transcript	long intergenic non-protein coding RNA 339 [Source:HGNC Symbol;Acc:HGNC:25011]	-	45	107	0.50371	1.29367
ENSG00000285763	-2.08759	4.25039	0.00813533	0.271875	AL358777.1	6	10659498	10692860	+	3467	antisense	novel transcript, antisense to C6orf52	-	6	25	0.0729147	0.328151
ENSG00000279491	-2.08759	4.25039	0.00813533	0.271875	AP003733.4	11	61967794	61969490	+	1697	TEC	uncharacterized LOC399900 [Source:NCBI gene;Acc:399900]	-	6	25	0.148966	0.670418
ENSG00000228487	-2.08759	4.25039	0.00813533	0.271875	AL450263.1	9	127213783	127221907	-	649	antisense	novel transcript, antisense to RALGPS1	-	6	25	0.389515	1.753
ENSG00000127366	-2.08759	4.25039	0.00813533	0.271875	TAS2R5	7	141790217	141791367	+	1151	protein_coding	taste 2 receptor member 5 [Source:HGNC Symbol;Acc:HGNC:14912]	-	6	25	0.219631	0.988445
ENSG00000111671	1.21269	2.3177	0.00814821	0.271875	SPSB2	12	6870935	6889358	-	2452	protein_coding	splA/ryanodine receptor domain and SOCS box containing 2 [Source:HGNC Symbol;Acc:HGNC:29522]	-	214	89	3.67715	1.6518
ENSG00000279968	-1.39025	2.62125	0.00818219	0.271875	GVQW2	6	138725211	138773652	-	2993	protein_coding	GVQW motif containing 2 [Source:HGNC Symbol;Acc:HGNC:51715]	-	28	71	0.394157	1.07954
ENSG00000104231	-1.10373	2.1491	0.00819418	0.271875	ZFAND1	8	81701334	81732903	-	4214	protein_coding	zinc finger AN1-type containing 1 [Source:HGNC Symbol;Acc:HGNC:25858]	-	1502	3114	15.0173	33.6288
ENSG00000178750	-1.19666	2.29209	0.00820177	0.271875	STX19	3	94014369	94028610	-	1158	protein_coding	syntaxin 19 [Source:HGNC Symbol;Acc:HGNC:19300]	-	94	208	3.42009	8.17415
ENSG00000260086	-1.82163	3.5348	0.00820426	0.271875	AC007611.1	16	48623436	48744921	+	1921	lincRNA	novel transcript	-	9	31	0.197394	0.734382
ENSG00000180189	-1.82163	3.5348	0.00820426	0.271875	HMGB1P14	14	58284773	58285363	+	591	processed_pseudogene	high mobility group box 1 pseudogene 14 [Source:HGNC Symbol;Acc:HGNC:20014]	-	9	31	0.641613	2.38705
ENSG00000243431	-1.82163	3.5348	0.00820426	0.271875	RPL5P30	11	118560690	118561580	+	891	processed_pseudogene	ribosomal protein L5 pseudogene 30 [Source:HGNC Symbol;Acc:HGNC:35837]	-	9	31	0.425581	1.58333
ENSG00000279312	-1.82163	3.5348	0.00820426	0.271875	AL136164.4	6	71373253	71375387	-	2135	TEC	TEC	-	9	31	0.177608	0.660772
ENSG00000275481	-1.57201	2.97319	0.00823221	0.271875	AC025031.4	12	46388856	46392126	+	3271	lincRNA	novel transcript	-	17	49	0.218971	0.681716
ENSG00000108465	-1.14118	2.20562	0.0082657	0.271875	CDK5RAP3	17	47967810	47981774	+	6070	protein_coding	CDK5 regulatory subunit associated protein 3 [Source:HGNC Symbol;Acc:HGNC:18673]	-	226	481	1.56869	3.60615
ENSG00000057593	-3.47875	11.1483	0.00839028	0.271875	F7	13	113105788	113120681	+	3795	protein_coding	coagulation factor VII [Source:HGNC Symbol;Acc:HGNC:3544]	-	1	12	0.0111021	0.143899
ENSG00000202337	-3.47875	11.1483	0.00839028	0.271875	RNU6-8	14	32203163	32203269	-	107	snRNA	RNA, U6 small nuclear 8 [Source:HGNC Symbol;Acc:HGNC:34285]	-	1	12	0.393762	5.1037
ENSG00000225544	3.38123	10.4196	0.00839028	0.271875	AC245452.2	22	21885282	21885673	-	392	processed_pseudogene	pseudogene similar to part of metallophosphoesterase 1 (MPPE1)	-	12	1	1.28977	0.116092
ENSG00000232712	3.38123	10.4196	0.00839028	0.271875	KIZ-AS1	20	21154023	21218289	-	5451	antisense	KIZ antisense RNA 1 [Source:HGNC Symbol;Acc:HGNC:51231]	-	12	1	0.0927519	0.00834856
ENSG00000236992	-3.47875	11.1483	0.00839028	0.271875	RPL12P12	20	19823443	19823943	-	501	processed_pseudogene	ribosomal protein L12 pseudogene 12 [Source:HGNC Symbol;Acc:HGNC:15951]	-	1	12	0.0840969	1.09001
ENSG00000260493	-3.47875	11.1483	0.00839028	0.271875	AC011773.4	8	85172077	85177062	-	1540	antisense	uncharacterized LOC102723322 [Source:NCBI gene;Acc:102723322]	-	1	12	0.0273588	0.354608
ENSG00000212124	-3.47875	11.1483	0.00839028	0.271875	TAS2R19	12	11021619	11022620	-	1002	protein_coding	taste 2 receptor member 19 [Source:HGNC Symbol;Acc:HGNC:19108]	-	1	12	0.0420485	0.545006
ENSG00000279035	-3.47875	11.1483	0.00839028	0.271875	AC022211.4	17	75130883	75133043	+	2161	TEC	TEC	-	1	12	0.0194968	0.252705
ENSG00000232871	-3.47875	11.1483	0.00839028	0.271875	SEC1P	19	48638071	48682245	+	2634	transcribed_unitary_pseudogene	secretory blood group 1, pseudogene [Source:HGNC Symbol;Acc:HGNC:44149]	-	1	12	0.0159957	0.207326
ENSG00000273027	3.38123	10.4196	0.00839028	0.271875	AL844908.2	21	44929653	44930112	-	460	sense_intronic	novel transcript, sense intronic to ITGB2	-	12	1	1.09911	0.0989304
ENSG00000224462	-3.47875	11.1483	0.00839028	0.271875	C4BPAP1	1	207165496	207183910	+	1893	unprocessed_pseudogene	complement component 4 binding protein, alpha pseudogene 1 [Source:HGNC Symbol;Acc:HGNC:1326]	-	1	12	0.022257	0.288482
ENSG00000239480	-3.47875	11.1483	0.00839028	0.271875	AC073517.1	7	102426818	102434780	-	541	antisense	novel transcript	-	1	12	0.077879	1.00942
ENSG00000212712	-3.47875	11.1483	0.00839028	0.271875	AP002414.1	18	12056676	12057822	-	1147	processed_pseudogene	kinesin family member 1C (KIF1C) pseudogene	-	1	12	0.0367328	0.476108
ENSG00000260619	-3.47875	11.1483	0.00839028	0.271875	AC068870.1	15	80990804	80993258	-	2455	lincRNA	novel transcript	-	1	12	0.0171619	0.222442
ENSG00000137573	-3.47875	11.1483	0.00839028	0.271875	SULF1	8	69466624	69660915	+	9404	protein_coding	sulfatase 1 [Source:HGNC Symbol;Acc:HGNC:20391]	-	1	12	0.00448028	0.0580706
ENSG00000264937	-3.47875	11.1483	0.00839028	0.271875	AC100830.2	15	64696622	64696861	+	240	antisense	novel transcript, antisense to ornithine decarboxylase antizyme 2 OAZ2	-	1	12	0.175552	2.2754
ENSG00000247624	-3.47875	11.1483	0.00839028	0.271875	CPEB2-DT	4	14909961	15002045	-	3089	lincRNA	CPEB2 divergent transcript [Source:HGNC Symbol;Acc:HGNC:49082]	-	1	12	0.0136395	0.176787
ENSG00000233893	3.38123	10.4196	0.00839028	0.271875	EZR-AS1	6	158817979	158822252	+	362	antisense	EZR antisense RNA 1 [Source:HGNC Symbol;Acc:HGNC:40609]	-	12	1	1.39666	0.125713
ENSG00000255408	-2.33749	5.05421	0.00845893	0.272371	PCDHA3	5	140801028	141012344	+	7460	protein_coding	protocadherin alpha 3 [Source:HGNC Symbol;Acc:HGNC:8669]	-	4	20	0.0225912	0.122005
ENSG00000197479	2.23556	4.70945	0.00845893	0.272371	PCDHB11	5	141199582	141203779	+	4198	protein_coding	protocadherin beta 11 [Source:HGNC Symbol;Acc:HGNC:8682]	-	20	4	0.200727	0.0433616
ENSG00000159197	-2.33749	5.05421	0.00845893	0.272371	KCNE2	21	34364024	34371389	+	1051	protein_coding	potassium voltage-gated channel subfamily E regulatory subunit 2 [Source:HGNC Symbol;Acc:HGNC:6242]	-	4	20	0.160352	0.865994
ENSG00000255710	-2.33749	5.05421	0.00845893	0.272371	AP003170.1	11	113820856	113821885	-	1030	processed_pseudogene	interferon stimulated exonuclease gene 20kDa-like 2 (ISG20L2) pseudogene	-	4	20	0.163622	0.88365
ENSG00000260213	-2.33749	5.05421	0.00845893	0.272371	AC092718.2	16	81016792	81035759	-	3393	antisense	uncharacterized LOC107984858 [Source:NCBI gene;Acc:107984858]	-	4	20	0.04967	0.268246
ENSG00000272841	1.20978	2.31303	0.00849842	0.273165	AL139393.2	6	160990318	160992342	-	2025	antisense	novel transcript, antisense to MAP3K4	-	180	75	3.74512	1.68548
ENSG00000251580	-1.24287	2.3667	0.00851457	0.273165	LINC02482	4	6648696	6673896	-	1167	lincRNA	long intergenic non-protein coding RNA 2482 [Source:HGNC Symbol;Acc:HGNC:53458]	-	63	144	2.27451	5.61538
ENSG00000231233	-1.54772	2.92354	0.00851568	0.273165	CFAP58-DT	10	104351591	104353575	-	795	antisense	CFAP58 divergent transcript [Source:HGNC Symbol;Acc:HGNC:45243]	-	18	51	0.953945	2.91938
ENSG00000108947	1.12572	2.1821	0.00859032	0.275214	EFNB3	17	7705202	7711378	+	3222	protein_coding	ephrin B3 [Source:HGNC Symbol;Acc:HGNC:3228]	-	629	278	8.22513	3.92651
ENSG00000170092	-1.4035	2.64542	0.00867488	0.277227	SPDYE5	7	75493625	75504304	+	3325	protein_coding	speedy/RINGO cell cycle regulator family member E5 [Source:HGNC Symbol;Acc:HGNC:35464]	-	25	64	0.316786	0.875943
ENSG00000278041	-1.4035	2.64542	0.00867488	0.277227	AL133325.3	20	21499261	21502934	-	3674	lincRNA	novel transcript	-	25	64	0.286694	0.792736
ENSG00000278864	-1.22697	2.34075	0.00870946	0.277984	AC055811.4	17	17181504	17183257	+	1754	TEC	novel transcript	-	73	165	1.75352	4.28097
ENSG00000178162	-1.62803	3.09091	0.0087349	0.278448	FAR2P2	2	130416755	130431363	-	5364	transcribed_unprocessed_pseudogene	fatty acyl-CoA reductase 2 pseudogene 2 [Source:HGNC Symbol;Acc:HGNC:49279]	-	14	42	0.109966	0.356327
ENSG00000253704	-1.76149	3.39049	0.00876482	0.278887	AC023632.2	8	94553722	94569745	+	1789	lincRNA	novel transcript	-	10	33	0.235509	0.839443
ENSG00000175265	-1.13798	2.20073	0.00877133	0.278887	GOLGA8A	15	34379068	34437466	-	6750	protein_coding	golgin A8 family member A [Source:HGNC Symbol;Acc:HGNC:31972]	-	194	412	1.21092	2.77767
ENSG00000197748	-1.52561	2.87909	0.00878145	0.278887	CFAP43	10	104129888	104232362	-	7184	protein_coding	cilia and flagella associated protein 43 [Source:HGNC Symbol;Acc:HGNC:26684]	-	19	53	0.111431	0.335735
ENSG00000165121	-1.17813	2.26283	0.00880115	0.279166	AL353743.1	9	85805359	85849542	+	2067	transcribed_unprocessed_pseudogene	kinesin family member 27 (KIF27) pseudogene	-	114	249	2.32371	5.4821
ENSG00000120875	-1.13047	2.1893	0.00888501	0.281476	DUSP4	8	29333064	29350668	-	7257	protein_coding	dual specificity phosphatase 4 [Source:HGNC Symbol;Acc:HGNC:3070]	-	231	488	1.34114	3.0602
ENSG00000106003	-1.14348	2.20913	0.00890365	0.281717	LFNG	7	2512529	2529177	+	3418	protein_coding	LFNG O-fucosylpeptide 3-beta-N-acetylglucosaminyltransferase [Source:HGNC Symbol;Acc:HGNC:6560]	-	182	388	2.24345	5.16592
ENSG00000120693	1.10396	2.14944	0.00894391	0.282641	SMAD9	13	36844831	36920765	-	5723	protein_coding	SMAD family member 9 [Source:HGNC Symbol;Acc:HGNC:6774]	MH1	1190	534	8.76075	4.24625
ENSG00000226383	-1.98	3.94493	0.00898543	0.282925	LINC01876	2	156011530	156254950	-	2716	lincRNA	long intergenic non-protein coding RNA 1876 [Source:HGNC Symbol;Acc:HGNC:52695]	-	7	27	0.108589	0.452399
ENSG00000087128	-1.98	3.94493	0.00898543	0.282925	TMPRSS11E	4	68447449	68497604	+	2138	protein_coding	transmembrane serine protease 11E [Source:HGNC Symbol;Acc:HGNC:24465]	-	7	27	0.137946	0.574703
ENSG00000124429	-1.344	2.53854	0.00898631	0.282925	POF1B	X	85277396	85379743	-	4029	protein_coding	POF1B, actin binding protein [Source:HGNC Symbol;Acc:HGNC:13711]	-	33	81	0.345092	0.914904
ENSG00000183098	1.14566	2.21247	0.00899722	0.282925	GPC6	13	93226842	94407401	+	6468	protein_coding	glypican 6 [Source:HGNC Symbol;Acc:HGNC:4454]	-	374	163	2.43624	1.14685
ENSG00000183604	-1.2573	2.39047	0.00904373	0.2839	SMG1P5	16	30267553	30335374	-	4791	transcribed_unprocessed_pseudogene	SMG1 pseudogene 5 [Source:HGNC Symbol;Acc:HGNC:49862]	-	55	127	0.483676	1.20633
ENSG00000140465	1.42907	2.69273	0.00905452	0.2839	CYP1A1	15	74719542	74725610	-	3435	protein_coding	cytochrome P450 family 1 subfamily A member 1 [Source:HGNC Symbol;Acc:HGNC:2595]	-	70	25	0.858597	0.331208
ENSG00000269001	-1.18013	2.26597	0.00907138	0.2839	AC092070.2	19	53197111	53214522	+	4052	transcribed_unprocessed_pseudogene	zinc finger protein pseudogene	-	96	210	0.998205	2.35851
ENSG00000198520	-1.59628	3.02364	0.00908383	0.2839	ARMH1	1	44674692	44725591	+	3290	protein_coding	armadillo-like helical domain containing 1 [Source:HGNC Symbol;Acc:HGNC:34345]	-	15	44	0.192094	0.608618
ENSG00000259448	-1.59628	3.02364	0.00908383	0.2839	LINC02352	15	31216020	31224445	+	1901	lincRNA	long intergenic non-protein coding RNA 2352 [Source:HGNC Symbol;Acc:HGNC:53274]	-	15	44	0.33245	1.05332
ENSG00000223459	1.17146	2.25239	0.00913886	0.285068	TCAF1P1	7	143598039	143604839	+	2233	unprocessed_pseudogene	TRPM8 channel associated factor 1 pseudogene 1 [Source:HGNC Symbol;Acc:HGNC:33604]	-	257	110	4.84911	2.24177
ENSG00000228486	-1.22038	2.33008	0.00914353	0.285068	C2orf92	2	97664217	97703064	+	6501	protein_coding	chromosome 2 open reading frame 92 [Source:HGNC Symbol;Acc:HGNC:49272]	-	72	162	0.466627	1.13402
ENSG00000272323	-1.2679	2.40811	0.00918536	0.286023	AC026801.2	5	34837549	34839278	-	1565	antisense	uncharacterized LOC101929704 [Source:NCBI gene;Acc:101929704]	-	49	114	1.31917	3.31496
ENSG00000231240	-1.71022	3.27211	0.00927012	0.288311	KLF2P1	2	130036958	130038422	+	1042	processed_pseudogene	Kruppel like factor 2 pseudogene 1 [Source:HGNC Symbol;Acc:HGNC:49280]	-	11	35	0.444778	1.52858
ENSG00000151881	-1.12465	2.18048	0.00940221	0.291119	TMEM267	5	43444252	43483893	-	3158	protein_coding	transmembrane protein 267 [Source:HGNC Symbol;Acc:HGNC:26139]	-	221	465	2.94848	6.70083
ENSG00000050030	1.52584	2.87955	0.009406	0.291119	NEXMIF	X	74732856	74925485	-	11869	protein_coding	neurite extension and migration factor [Source:HGNC Symbol;Acc:HGNC:29433]	-	48	16	0.17039	0.061347
ENSG00000110944	-1.56789	2.96471	0.009406	0.291119	IL23A	12	56334174	56340410	+	1187	protein_coding	interleukin 23 subunit alpha [Source:HGNC Symbol;Acc:HGNC:15488]	-	16	46	0.56792	1.76358
ENSG00000278558	1.52584	2.87955	0.009406	0.291119	TMEM191B	22	18527802	18530573	+	2067	protein_coding	transmembrane protein 191B [Source:HGNC Symbol;Acc:HGNC:33600]	-	48	16	0.978405	0.352263
ENSG00000162545	1.15132	2.22117	0.00945655	0.292329	CAMK2N1	1	20482391	20486220	-	2615	protein_coding	calcium/calmodulin dependent protein kinase II inhibitor 1 [Source:HGNC Symbol;Acc:HGNC:24190]	-	311	135	5.01079	2.34936
ENSG00000251363	-1.4698	2.76984	0.00948574	0.292523	LINC02315	14	40954898	40975877	+	696	lincRNA	long intergenic non-protein coding RNA 2315 [Source:HGNC Symbol;Acc:HGNC:53234]	-	22	59	1.33178	3.85772
ENSG00000240291	-1.4698	2.76984	0.00948574	0.292523	AL450384.2	10	18513115	18545651	-	1575	antisense	novel transcript, antisense to CACNB2	-	22	59	0.588518	1.70474
ENSG00000235706	-1.21576	2.32263	0.00954758	0.294062	DICER1-AS1	14	95157645	95179933	+	3722	antisense	DICER1 antisense RNA 1 [Source:HGNC Symbol;Acc:HGNC:43017]	-	70	157	0.792391	1.9196
ENSG00000157999	-1.35076	2.55046	0.0095587	0.294062	ANKRD61	7	6031376	6036386	+	1257	protein_coding	ankyrin repeat domain 61 [Source:HGNC Symbol;Acc:HGNC:22467]	-	30	74	1.00555	2.67907
ENSG00000111452	-1.15426	2.2257	0.00959255	0.2941	ADGRD1	12	130953907	131141469	+	14718	protein_coding	adhesion G protein-coupled receptor D1 [Source:HGNC Symbol;Acc:HGNC:19893]	-	135	290	0.386458	0.896679
ENSG00000187634	1.09413	2.13484	0.00965371	0.2941	SAMD11	1	923928	944581	+	4166	protein_coding	sterile alpha motif domain containing 11 [Source:HGNC Symbol;Acc:HGNC:28706]	-	1162	525	11.7518	5.73493
ENSG00000135925	-1.54234	2.91266	0.00970392	0.2941	WNT10A	2	218880363	218899581	+	3412	protein_coding	Wnt family member 10A [Source:HGNC Symbol;Acc:HGNC:13829]	-	17	48	0.209922	0.640206
ENSG00000185303	1.37177	2.58787	0.0097115	0.2941	SFTPA2	10	79555852	79560402	-	2690	protein_coding	surfactant protein A2 [Source:HGNC Symbol;Acc:HGNC:10799]	-	78	29	1.22169	0.490607
ENSG00000257660	-1.34206	2.53513	0.0097115	0.2941	AC117498.2	12	48789147	48790535	+	554	lincRNA	uncharacterized LOC100506125 [Source:NCBI gene;Acc:100506125]	-	31	76	2.3576	6.24297
ENSG00000108691	-1.66596	3.17325	0.00972615	0.2941	CCL2	17	34255218	34257203	+	1986	protein_coding	C-C motif chemokine ligand 2 [Source:HGNC Symbol;Acc:HGNC:10618]	-	12	37	0.254577	0.847833
ENSG00000179603	1.63854	3.11352	0.00972615	0.2941	GRM8	7	126438598	127253294	-	6457	protein_coding	glutamate metabotropic receptor 8 [Source:HGNC Symbol;Acc:HGNC:4600]	-	39	12	0.254479	0.0845743
ENSG00000102349	-1.66596	3.17325	0.00972615	0.2941	KLF8	X	56232421	56287889	+	9022	protein_coding	Kruppel like factor 8 [Source:HGNC Symbol;Acc:HGNC:6351]	zf-C2H2	12	37	0.0560398	0.186632
ENSG00000203280	-1.66596	3.17325	0.00972615	0.2941	AL022323.1	22	25102433	25112692	-	957	antisense	uncharacterized LOC100128531 [Source:NCBI gene;Acc:100128531]	-	12	37	0.528308	1.75945
ENSG00000112981	-1.18343	2.27116	0.00972846	0.2941	NME5	5	138115172	138139443	-	2392	protein_coding	NME/NM23 family member 5 [Source:HGNC Symbol;Acc:HGNC:7853]	-	83	182	1.46196	3.46256
ENSG00000136040	-1.89322	3.71463	0.00973082	0.2941	PLXNC1	12	94148723	94307675	+	9887	protein_coding	plexin C1 [Source:HGNC Symbol;Acc:HGNC:9106]	-	8	29	0.0340913	0.133482
ENSG00000143199	-1.89322	3.71463	0.00973082	0.2941	ADCY10	1	167809388	167914215	-	6139	protein_coding	adenylate cyclase 10 [Source:HGNC Symbol;Acc:HGNC:21285]	-	8	29	0.0549048	0.214975
ENSG00000271327	-1.89322	3.71463	0.00973082	0.2941	AC010201.2	12	89367807	89369301	+	1495	lincRNA	novel transcript	-	8	29	0.225459	0.882764
ENSG00000234500	-1.89322	3.71463	0.00973082	0.2941	AC008267.3	7	66511556	66545066	+	712	unprocessed_pseudogene	GTF2I repeat domain containing 1 (GTF2IRD1) pseudogene	-	8	29	0.4734	1.85356
ENSG00000256897	-2.16119	4.47282	0.00973269	0.2941	AC018410.2	11	47220218	47221751	-	610	antisense	novel transcript	-	5	22	0.345349	1.64127
ENSG00000106546	1.27411	2.41849	0.00974612	0.294158	AHR	7	16916359	17346152	+	8081	protein_coding	aryl hydrocarbon receptor [Source:HGNC Symbol;Acc:HGNC:348]	bHLH	113	45	0.589157	0.253417
ENSG00000187815	-1.33386	2.52076	0.00985747	0.296975	ZFP69	1	40477215	40496343	+	3248	protein_coding	ZFP69 zinc finger protein [Source:HGNC Symbol;Acc:HGNC:24708]	zf-C2H2	32	78	0.415099	1.09286
ENSG00000162994	-1.23953	2.36122	0.00986295	0.296975	CLHC1	2	55174791	55232563	-	4398	protein_coding	clathrin heavy chain linker domain containing 1 [Source:HGNC Symbol;Acc:HGNC:26453]	-	57	130	0.546056	1.34517
ENSG00000157578	-1.28187	2.43154	0.00987434	0.296975	LCA5L	21	39405844	39445805	-	5841	protein_coding	LCA5L, lebercilin like [Source:HGNC Symbol;Acc:HGNC:1255]	-	40	94	0.28853	0.732366
ENSG00000175283	1.09208	2.13181	0.00992891	0.298265	DOLK	9	128945530	128947619	-	2090	protein_coding	dolichol kinase [Source:HGNC Symbol;Acc:HGNC:23406]	-	904	409	18.2238	8.90563
ENSG00000104549	1.08237	2.11751	0.00995988	0.298603	SQLE	8	124998497	125022283	+	4305	protein_coding	squalene epoxidase [Source:HGNC Symbol;Acc:HGNC:11279]	-	1675	763	16.393	8.06564
ENSG00000272578	-1.32611	2.50725	0.009997	0.298603	AP000347.1	22	23658094	23717356	-	7012	transcribed_unprocessed_pseudogene	glucuronidase, beta (GUSB) pseudogene	-	33	80	0.198285	0.519201
ENSG00000140406	1.10286	2.1478	0.0100075	0.298603	TLNRD1	15	81000944	81005788	+	4845	protein_coding	talin rod domain containing 1 [Source:HGNC Symbol;Acc:HGNC:13519]	-	677	304	5.88725	2.8554
ENSG00000161681	-2.50486	5.67594	0.0100337	0.298603	SHANK1	19	50661827	50719450	-	7567	protein_coding	SH3 and multiple ankyrin repeat domains 1 [Source:HGNC Symbol;Acc:HGNC:15474]	-	3	17	0.0167038	0.102238
ENSG00000169627	-2.50486	5.67594	0.0100337	0.298603	BOLA2B	16	30192934	30194306	-	1365	protein_coding	bolA family member 2B [Source:HGNC Symbol;Acc:HGNC:32479]	-	3	17	0.092599	0.566766
ENSG00000258240	-2.50486	5.67594	0.0100337	0.298603	AC002351.1	12	110951683	110957812	-	594	lincRNA	uncharacterized LOC105369980 [Source:NCBI gene;Acc:105369980]	-	3	17	0.212791	1.30242
ENSG00000271550	-2.50486	5.67594	0.0100337	0.298603	BNIP3P11	7	64678954	64687393	-	563	processed_pseudogene	BCL2 interacting protein 3 pseudogene 11 [Source:HGNC Symbol;Acc:HGNC:49724]	-	3	17	0.224507	1.37413
ENSG00000235052	-2.50486	5.67594	0.0100337	0.298603	AL021154.1	1	23549139	23550915	-	456	lincRNA	novel transcript	-	3	17	0.277188	1.69657
ENSG00000108551	-1.36952	2.58384	0.0100741	0.29876	RASD1	17	17494437	17496395	-	1748	protein_coding	ras related dexamethasone induced 1 [Source:HGNC Symbol;Acc:HGNC:15828]	-	26	65	0.626686	1.69223
ENSG00000116883	-1.36952	2.58384	0.0100741	0.29876	AL591845.1	1	36323734	36329221	+	1838	antisense	novel transcript, antisense to EVA1B	-	26	65	0.595999	1.60937
ENSG00000235703	-1.36952	2.58384	0.0100741	0.29876	LINC00894	X	149938628	150224580	+	6323	antisense	long intergenic non-protein coding RNA 894 [Source:HGNC Symbol;Acc:HGNC:48579]	-	26	65	0.173248	0.467819
ENSG00000168065	-1.62735	3.08946	0.0101384	0.29997	SLC22A11	11	64555626	64572875	+	5222	protein_coding	solute carrier family 22 member 11 [Source:HGNC Symbol;Acc:HGNC:18120]	-	13	39	0.104888	0.339872
ENSG00000280067	-1.62735	3.08946	0.0101384	0.29997	AC023818.1	16	48343755	48346058	-	2304	TEC	novel transcript	-	13	39	0.237727	0.770318
ENSG00000108592	1.07565	2.10766	0.0101735	0.300659	FTSJ3	17	63819433	63830012	-	5212	protein_coding	FtsJ RNA methyltransferase homolog 3 [Source:HGNC Symbol;Acc:HGNC:17136]	-	2102	962	16.9921	8.3996
ENSG00000170516	-1.26701	2.40662	0.0101902	0.300805	COX7B2	4	46734827	46909235	-	807	protein_coding	cytochrome c oxidase subunit 7B2 [Source:HGNC Symbol;Acc:HGNC:24381]	-	43	100	2.24498	5.63916
ENSG00000283491	-1.4982	2.82489	0.0102358	0.301803	AC017104.5	2	231497090	231507256	-	639	unprocessed_pseudogene	nucleolin (NCL) pseudogene	-	19	52	1.25277	3.70331
ENSG00000139631	-1.09518	2.1364	0.0102905	0.303065	CSAD	12	53157663	53180909	-	4390	protein_coding	cysteine sulfinic acid decarboxylase [Source:HGNC Symbol;Acc:HGNC:18966]	-	359	740	3.44546	7.67105
ENSG00000073734	1.42796	2.69066	0.0104737	0.308104	ABCB11	2	168915498	169031324	-	7715	protein_coding	ATP binding cassette subfamily B member 11 [Source:HGNC Symbol;Acc:HGNC:42]	-	56	20	0.305823	0.117973
ENSG00000188739	-1.59337	3.01753	0.0105118	0.308872	RBM34	1	235131183	235161457	-	3113	protein_coding	RNA binding motif protein 34 [Source:HGNC Symbol;Acc:HGNC:28965]	-	14	41	0.189481	0.599366
ENSG00000197815	-1.20133	2.29951	0.0105989	0.311071	AC122129.1	17	17858227	17860041	+	1815	antisense	novel transcript, antisense to TOM1L2	-	68	151	1.57852	3.78606
ENSG00000264334	-1.2461	2.37199	0.0106498	0.312206	AC134978.1	18	77983020	77986610	-	788	lincRNA	novel transcript	-	48	110	2.56645	6.35264
ENSG00000278594	1.40851	2.65462	0.010695	0.313173	AL589182.2	14	19131842	19132890	-	1049	processed_pseudogene	translocase of outer mitochondrial membrane 40 homolog (yeast) (TOMM40) pseudogene	-	58	21	2.32954	0.911028
ENSG00000115009	-2.02899	4.0812	0.0108117	0.315052	CCL20	2	227805739	227817564	+	1594	protein_coding	C-C motif chemokine ligand 20 [Source:HGNC Symbol;Acc:HGNC:10619]	-	6	24	0.158592	0.685189
ENSG00000064300	1.9265	3.80132	0.0108117	0.315052	NGFR	17	49495293	49515017	+	4150	protein_coding	nerve growth factor receptor [Source:HGNC Symbol;Acc:HGNC:7809]	-	24	6	0.243658	0.0657947
ENSG00000131044	-2.02899	4.0812	0.0108117	0.315052	TTLL9	20	31870702	31944963	+	6175	protein_coding	tubulin tyrosine ligase like 9 [Source:HGNC Symbol;Acc:HGNC:16118]	-	6	24	0.0409385	0.176873
ENSG00000231628	-2.02899	4.0812	0.0108117	0.315052	AL133406.2	6	105279016	105281755	+	1198	antisense	novel transcript	-	6	24	0.211014	0.911679
ENSG00000125398	-1.21749	2.32542	0.0108332	0.315052	SOX9	17	72121020	72126420	+	3935	protein_coding	SRY-box 9 [Source:HGNC Symbol;Acc:HGNC:11204]	HMG	61	137	0.653135	1.5844
ENSG00000080854	-1.21749	2.32542	0.0108332	0.315052	IGSF9B	11	133908564	133956985	-	5753	protein_coding	immunoglobulin superfamily member 9B [Source:HGNC Symbol;Acc:HGNC:32326]	-	61	137	0.446738	1.08371
ENSG00000283443	-1.32298	2.50183	0.0108603	0.315479	AC018688.1	20	30545601	30551470	+	1754	unprocessed_pseudogene	zinc finger protein 285 (ZNF285) pseudogene	-	31	75	0.744646	1.94589
ENSG00000273802	-1.14946	2.2183	0.0109376	0.317364	HIST1H2BG	6	26215159	26216692	-	1534	protein_coding	histone cluster 1 H2B family member g [Source:HGNC Symbol;Acc:HGNC:4746]	-	99	212	2.71912	6.28924
ENSG00000138161	-1.25697	2.38993	0.0110193	0.319373	CUZD1	10	122832149	122850793	-	3464	protein_coding	CUB and zona pellucida like domains 1 [Source:HGNC Symbol;Acc:HGNC:17937]	-	42	97	0.510845	1.27433
ENSG00000285437	-1.30799	2.47596	0.0111217	0.321599	POLR2J3	7	102562133	102572583	-	7195	protein_coding	RNA polymerase II subunit J3 [Source:HGNC Symbol;Acc:HGNC:33853]	-	33	79	0.193242	0.499671
ENSG00000069020	1.06784	2.0963	0.0111259	0.321599	MAST4	5	66596361	67169595	+	14675	protein_coding	microtubule associated serine/threonine kinase family member 4 [Source:HGNC Symbol;Acc:HGNC:19037]	-	1417	652	4.06827	2.02189
ENSG00000235652	-1.53627	2.90043	0.0111591	0.321599	AL356599.1	6	145799409	145886585	+	6116	antisense	uncharacterized LOC100507557 [Source:NCBI gene;Acc:100507557]	-	16	45	0.110223	0.334836
ENSG00000008516	-1.53627	2.90043	0.0111591	0.321599	MMP25	16	3046681	3060726	+	4126	protein_coding	matrix metallopeptidase 25 [Source:HGNC Symbol;Acc:HGNC:14246]	-	16	45	0.163384	0.496331
ENSG00000235984	-1.53627	2.90043	0.0111591	0.321599	GPC5-AS1	13	92701389	92721614	-	461	antisense	GPC5 antisense RNA 1 [Source:HGNC Symbol;Acc:HGNC:39886]	-	16	45	1.4623	4.44221
ENSG00000111012	-1.22284	2.33406	0.011182	0.321895	CYP27B1	12	57762334	57768986	-	3440	protein_coding	cytochrome P450 family 27 subfamily B member 1 [Source:HGNC Symbol;Acc:HGNC:2606]	-	55	124	0.673631	1.6404
ENSG00000246308	-1.30109	2.46416	0.011243	0.32217	AC116535.1	11	10809297	10822931	+	2335	antisense	uncharacterized LOC101928053 [Source:NCBI gene;Acc:101928053]	-	34	81	0.613493	1.57865
ENSG00000227671	-1.08045	2.11469	0.0112781	0.32217	AL390728.4	1	247189851	247210856	-	2160	transcribed_unprocessed_pseudogene	zinc finger protein pseudogene	-	347	708	6.76852	14.9165
ENSG00000262580	-1.13033	2.18909	0.0113416	0.32217	AC087741.1	17	80200673	80205949	-	5122	antisense	novel transcript, antisense to CARD14	-	124	262	1.02	2.32782
ENSG00000120738	1.4687	2.76772	0.0114402	0.32217	EGR1	5	138465490	138469315	+	3138	protein_coding	early growth response 1 [Source:HGNC Symbol;Acc:HGNC:3238]	zf-C2H2	49	17	0.657902	0.246538
ENSG00000218418	-1.66855	3.17895	0.0114634	0.32217	AL591135.1	6	80064286	80070199	-	5914	processed_pseudogene	Rho GTPase activating protein 21 (ARHGAP21) pseudogene	-	11	34	0.0783663	0.261629
ENSG00000246339	-1.66855	3.17895	0.0114634	0.32217	EXTL3-AS1	8	28696198	28701464	-	4261	antisense	EXTL3 antisense RNA 1 [Source:HGNC Symbol;Acc:HGNC:27985]	-	11	34	0.108767	0.363124
ENSG00000144837	-1.33732	2.52681	0.0116011	0.32217	PLA1A	3	119597842	119629811	+	2202	protein_coding	phospholipase A1 member A [Source:HGNC Symbol;Acc:HGNC:17661]	-	27	66	0.516612	1.364
ENSG00000214765	-1.09221	2.13201	0.0116265	0.32217	SEPT7P2	7	45723780	45768985	-	4496	transcribed_unprocessed_pseudogene	septin 7 pseudogene 2 [Source:HGNC Symbol;Acc:HGNC:32339]	-	227	467	2.12724	4.72692
ENSG00000166341	-1.20227	2.30101	0.0116714	0.32217	DCHS1	11	6621323	6655854	-	10765	protein_coding	dachsous cadherin-related 1 [Source:HGNC Symbol;Acc:HGNC:13681]	-	63	140	0.246572	0.591836
ENSG00000159588	-1.49014	2.80917	0.011697	0.32217	CCDC17	1	45620044	45624057	-	3323	protein_coding	coiled-coil domain containing 17 [Source:HGNC Symbol;Acc:HGNC:26574]	-	18	49	0.228223	0.671048
ENSG00000218350	-1.9258	3.79948	0.0117239	0.32217	LYPLA1P3	6	71165076	71165770	+	695	processed_pseudogene	lysophospholipase I pseudogene 3 [Source:HGNC Symbol;Acc:HGNC:44007]	-	7	26	0.424357	1.70246
ENSG00000227620	1.82314	3.5385	0.0117239	0.32217	ALG1L8P	11	67785273	67792335	+	760	unprocessed_pseudogene	asparagine-linked glycosylation 1-like 8, pseudogene [Source:HGNC Symbol;Acc:HGNC:44377]	-	26	7	1.44138	0.419153
ENSG00000234773	-1.9258	3.79948	0.0117239	0.32217	AC012618.3	19	12195015	12237767	+	3140	transcribed_unprocessed_pseudogene	novel zinc finger protein pseudogene	-	7	26	0.0939261	0.376818
ENSG00000285458	-1.9258	3.79948	0.0117239	0.32217	AC093827.5	4	86886472	86936178	-	2497	protein_coding	novel protein	-	7	26	0.118113	0.473852
ENSG00000259882	-1.9258	3.79948	0.0117239	0.32217	AC142384.1	16	33577502	33622547	+	1549	unprocessed_pseudogene	rhophilin, Rho GTPase binding protein 2 (RHPN2) pseudogene	-	7	26	0.190399	0.763853
ENSG00000263427	-1.32808	2.51068	0.0117497	0.32217	AC129492.2	17	8056225	8057621	-	517	lincRNA	novel transcript	-	28	68	2.28184	5.98558
ENSG00000244128	-1.32808	2.51068	0.0117497	0.32217	LINC01322	3	165206960	165655423	+	1860	lincRNA	long intergenic non-protein coding RNA 1322 [Source:HGNC Symbol;Acc:HGNC:50528]	-	28	68	0.634254	1.66373
ENSG00000231503	-2.26395	4.80305	0.011803	0.32217	PTMAP4	12	9239986	9240331	-	346	processed_pseudogene	prothymosin alpha pseudogene 4 [Source:HGNC Symbol;Acc:HGNC:9627]	-	4	19	0.487082	2.49899
ENSG00000272970	2.16204	4.47547	0.011803	0.32217	AC107294.2	3	184734075	184738949	+	701	lincRNA	novel transcript	-	19	4	1.14197	0.259675
ENSG00000280114	-2.26395	4.80305	0.011803	0.32217	AL021920.2	1	16681097	16688749	-	1351	unprocessed_pseudogene	phosphodiesterase 4D interacting protein (myomegalin) (PDE4DIP) pseudogene	-	4	19	0.124745	0.640009
ENSG00000269425	-2.26395	4.80305	0.011803	0.32217	AC104521.1	19	4339577	4343491	+	279	antisense	novel transcript, antisense to STAP2	-	4	19	0.604051	3.09911
ENSG00000215237	-2.26395	4.80305	0.011803	0.32217	AL592293.1	9	14993312	15019729	+	1188	unprocessed_pseudogene	chromosome 4 open reading frame 27 (C4orf27) pseudogene	-	4	19	0.14186	0.727821
ENSG00000284959	-2.26395	4.80305	0.011803	0.32217	AC007262.2	14	81012099	81170414	-	8011	antisense	uncharacterized LOC101928462 [Source:NCBI gene;Acc:101928462]	-	4	19	0.0210374	0.107933
ENSG00000258344	-2.26395	4.80305	0.011803	0.32217	AC078778.2	12	54276631	54345083	+	567	sense_overlapping	novel transcript, sense overlapping to COPZ1 & HNRNPA1	-	4	19	0.297231	1.52496
ENSG00000275910	-2.26395	4.80305	0.011803	0.32217	AC138932.5	16	15015828	15016390	-	563	antisense	novel transcript, antisense to PDXDC1	-	4	19	0.299343	1.53579
ENSG00000130222	-1.08961	2.12817	0.0118163	0.32217	GADD45G	9	89605013	89606555	+	1322	protein_coding	growth arrest and DNA damage inducible gamma [Source:HGNC Symbol;Acc:HGNC:4097]	-	224	460	7.13895	15.8349
ENSG00000109944	2.68256	6.41995	0.0118324	0.32217	JHY	11	122882528	122959798	+	4680	protein_coding	junctional cadherin complex regulator [Source:HGNC Symbol;Acc:HGNC:26288]	-	14	2	0.126038	0.0194479
ENSG00000244468	-2.78287	6.88221	0.0118324	0.32217	AC093001.1	3	149284782	149333653	+	551	antisense	novel transcript	-	2	14	0.152931	1.15628
ENSG00000206921	-2.78287	6.88221	0.0118324	0.32217	RNU6-481P	1	161401289	161401395	+	107	snRNA	RNA, U6 small nuclear 481, pseudogene [Source:HGNC Symbol;Acc:HGNC:47444]	-	2	14	0.787524	5.95432
ENSG00000233056	-2.78287	6.88221	0.0118324	0.32217	ERVH48-1	21	42916803	42925646	-	2842	lincRNA	endogenous retrovirus group 48 member 1 [Source:HGNC Symbol;Acc:HGNC:17216]	-	2	14	0.0296499	0.224177
ENSG00000239791	2.68256	6.41995	0.0118324	0.32217	AC002310.2	16	30572250	30583860	+	1918	antisense	novel transcript	-	14	2	0.307537	0.0474536
ENSG00000164588	2.68256	6.41995	0.0118324	0.32217	HCN1	5	45254950	45696498	-	13704	protein_coding	hyperpolarization activated cyclic nucleotide gated potassium channel 1 [Source:HGNC Symbol;Acc:HGNC:4845]	-	14	2	0.0430426	0.00664156
ENSG00000280198	2.68256	6.41995	0.0118324	0.32217	AC087163.3	17	18026072	18026771	-	700	TEC	novel transcript	-	14	2	0.842651	0.130023
ENSG00000207110	-2.78287	6.88221	0.0118324	0.32217	RNU1-106P	8	127999131	127999294	+	164	snRNA	RNA, U1 small nuclear 106, pseudogene [Source:HGNC Symbol;Acc:HGNC:48448]	-	2	14	0.513812	3.88483
ENSG00000261431	-2.78287	6.88221	0.0118324	0.32217	AL023803.1	20	38961925	38962111	-	187	antisense	novel transcript, antisense to DHX35	-	2	14	0.450616	3.40702
ENSG00000224794	-2.78287	6.88221	0.0118324	0.32217	AL022326.1	22	39292988	39295589	+	1804	lincRNA	novel transcript	-	2	14	0.0467102	0.353166
ENSG00000217455	-2.78287	6.88221	0.0118324	0.32217	AC073316.1	7	3140234	3174654	-	1725	lincRNA	uncharacterized LOC100129603 [Source:NCBI gene;Acc:100129603]	-	2	14	0.0488493	0.36934
ENSG00000250874	-1.31942	2.49567	0.0118895	0.32217	AC010595.1	5	85663232	85664684	+	1453	lincRNA	novel transcript	-	29	70	0.840911	2.1924
ENSG00000240216	-1.62657	3.08777	0.0119088	0.32217	CPHL1P	3	149229356	149291800	-	3934	transcribed_unitary_pseudogene	ceruloplasmin and hephaestin-like 1 pseudogene [Source:HGNC Symbol;Acc:HGNC:31714]	-	12	36	0.128518	0.416443
ENSG00000081665	-1.0862	2.12315	0.0120298	0.32217	ZNF506	19	19785839	19821751	-	8414	protein_coding	zinc finger protein 506 [Source:HGNC Symbol;Acc:HGNC:23780]	zf-C2H2	205	420	1.02652	2.27161
ENSG00000151623	1.08336	2.11896	0.012085	0.32217	NR3C2	4	148078762	148444698	-	6607	protein_coding	nuclear receptor subfamily 3 group C member 2 [Source:HGNC Symbol;Acc:HGNC:7979]	ESR-like	479	218	3.05456	1.50155
ENSG00000181284	1.26045	2.3957	0.0121171	0.32217	TMEM102	17	7435443	7437679	+	2129	protein_coding	transmembrane protein 102 [Source:HGNC Symbol;Acc:HGNC:26722]	-	102	41	2.01856	0.876387
ENSG00000139970	1.07305	2.10388	0.0122903	0.32217	RTN1	14	59595976	59870966	-	6209	protein_coding	reticulon 1 [Source:HGNC Symbol;Acc:HGNC:10467]	-	589	270	3.99679	1.97893
ENSG00000285872	-1.59	3.01049	0.0123028	0.32217	AC007240.2	2	10287800	10302485	-	1871	bidirectional_promoter_lncRNA	uncharacterized LOC101929691 [Source:NCBI gene;Acc:101929691]	-	13	38	0.292744	0.924267
ENSG00000156384	-1.073	2.1038	0.0123132	0.32217	SFR1	10	104122058	104126385	+	1812	protein_coding	SWI5 dependent homologous recombination repair protein 1 [Source:HGNC Symbol;Acc:HGNC:29574]	-	301	611	6.99884	15.3451
ENSG00000185818	1.05598	2.07913	0.0123534	0.32217	NAT8L	4	2059512	2069089	+	5871	protein_coding	N-acetyltransferase 8 like [Source:HGNC Symbol;Acc:HGNC:26742]	-	1164	540	8.35331	4.18571
ENSG00000279865	-1.28964	2.44466	0.012373	0.32217	AC006511.3	12	8080381	8082163	-	1783	TEC	TEC	-	33	78	0.779795	1.99082
ENSG00000133256	-1.2832	2.43378	0.0124778	0.32217	PDE6B	4	625584	670782	+	5086	protein_coding	phosphodiesterase 6B [Source:HGNC Symbol;Acc:HGNC:8786]	-	34	80	0.281657	0.715816
ENSG00000269226	-1.84281	3.58708	0.0124954	0.32217	TMSB15B	X	104063871	104076212	-	3061	protein_coding	thymosin beta 15B [Source:NCBI gene;Acc:286527]	-	8	28	0.110114	0.416277
ENSG00000188199	1.74002	3.34039	0.0124954	0.32217	NUTM2B	10	79703227	79714681	+	5080	protein_coding	NUT family member 2B [Source:HGNC Symbol;Acc:HGNC:23445]	-	28	8	0.232227	0.0716661
ENSG00000267682	-1.84281	3.58708	0.0124954	0.32217	AC016590.2	19	37337236	37337743	+	375	sense_intronic	novel transcript, sense intronic to HKR1	-	8	28	0.898828	3.39793
ENSG00000181634	-1.17772	2.26218	0.0125242	0.32217	TNFSF15	9	114784635	114806126	-	7889	protein_coding	TNF superfamily member 15 [Source:HGNC Symbol;Acc:HGNC:11931]	-	65	142	0.347144	0.819132
ENSG00000278811	-1.42015	2.67614	0.0125289	0.32217	LINC00624	1	147258885	147517875	-	5564	antisense	long intergenic non-protein coding RNA 624 [Source:HGNC Symbol;Acc:HGNC:44254]	-	22	57	0.166592	0.466203
ENSG00000125780	-1.21332	2.31871	0.0126036	0.32217	TGM3	20	2296001	2341078	+	2693	protein_coding	transglutaminase 3 [Source:HGNC Symbol;Acc:HGNC:11779]	-	50	112	0.782261	1.89265
ENSG00000089199	5.99704	63.869	0.0127308	0.32217	CHGB	20	5911430	5925361	+	4535	protein_coding	chromogranin B [Source:HGNC Symbol;Acc:HGNC:1930]	-	8	0	0.0743243	0
ENSG00000006210	5.99704	63.869	0.0127308	0.32217	CX3CL1	16	57372458	57385048	+	5983	protein_coding	C-X3-C motif chemokine ligand 1 [Source:HGNC Symbol;Acc:HGNC:10647]	-	8	0	0.0563364	0
ENSG00000168843	-6.04816	66.1724	0.0127308	0.32217	FSTL5	4	161383897	162164035	-	5355	protein_coding	follistatin like 5 [Source:HGNC Symbol;Acc:HGNC:21386]	-	0	8	0	0.0679858
ENSG00000084453	-6.04816	66.1724	0.0127308	0.32217	SLCO1A2	12	21264600	21419594	-	11520	protein_coding	solute carrier organic anion transporter family member 1A2 [Source:HGNC Symbol;Acc:HGNC:10956]	-	0	8	0	0.0316028
ENSG00000011201	5.99704	63.869	0.0127308	0.32217	ANOS1	X	8528874	8732186	-	7131	protein_coding	anosmin 1 [Source:HGNC Symbol;Acc:HGNC:6211]	-	8	0	0.0472669	0
ENSG00000213846	5.99704	63.869	0.0127308	0.32217	AC098614.1	3	27632976	27635427	+	2452	transcribed_processed_pseudogene	tropomyosin 4 (TPM4) pseudogene	-	8	0	0.137463	0
ENSG00000147869	-6.04816	66.1724	0.0127308	0.32217	CER1	9	14719724	14722717	-	1215	protein_coding	cerberus 1, DAN family BMP antagonist [Source:HGNC Symbol;Acc:HGNC:1862]	-	0	8	0	0.299641
ENSG00000148655	-6.04816	66.1724	0.0127308	0.32217	LRMDA	10	75431453	76560167	+	6560	protein_coding	leucine rich melanocyte differentiation associated [Source:HGNC Symbol;Acc:HGNC:23405]	-	0	8	0	0.0554976
ENSG00000204711	-6.04816	66.1724	0.0127308	0.32217	C9orf135	9	69820793	69906232	+	1279	protein_coding	chromosome 9 open reading frame 135 [Source:HGNC Symbol;Acc:HGNC:31422]	-	0	8	0	0.284647
ENSG00000278897	-6.04816	66.1724	0.0127308	0.32217	AC020951.1	19	11856032	11858302	+	2271	TEC	TEC	-	0	8	0	0.16031
ENSG00000243646	-6.04816	66.1724	0.0127308	0.32217	IL10RB	21	33266358	33310187	+	4548	protein_coding	interleukin 10 receptor subunit beta [Source:HGNC Symbol;Acc:HGNC:5965]	-	0	8	0	0.0800492
ENSG00000232060	5.99704	63.869	0.0127308	0.32217	SLC4A1APP1	9	30558880	30559481	-	602	processed_pseudogene	solute carrier family 4 member 1 adaptor protein pseudogene 1 [Source:HGNC Symbol;Acc:HGNC:49811]	-	8	0	0.559901	0
ENSG00000248714	-6.04816	66.1724	0.0127308	0.32217	AC091180.2	17	49361165	49369998	+	881	lincRNA	uncharacterized LOC102724596 [Source:NCBI gene;Acc:102724596]	-	0	8	0	0.413239
ENSG00000173557	-6.04816	66.1724	0.0127308	0.32217	C2orf70	2	26562582	26579532	+	2507	protein_coding	chromosome 2 open reading frame 70 [Source:HGNC Symbol;Acc:HGNC:27938]	-	0	8	0	0.145219
ENSG00000162888	-6.04816	66.1724	0.0127308	0.32217	C1orf147	1	206491116	206497728	-	2096	antisense	chromosome 1 open reading frame 147 [Source:HGNC Symbol;Acc:HGNC:32061]	-	0	8	0	0.173695
ENSG00000227666	-6.04816	66.1724	0.0127308	0.32217	CYCSP24	9	94038030	94038345	+	316	processed_pseudogene	cytochrome c, somatic pseudogene 24 [Source:HGNC Symbol;Acc:HGNC:24398]	-	0	8	0	1.1521
ENSG00000230325	-6.04816	66.1724	0.0127308	0.32217	AL359921.1	1	236540094	236550280	-	494	antisense	novel transcript	-	0	8	0	0.736972
ENSG00000260941	-6.04816	66.1724	0.0127308	0.32217	LINC00622	1	119597702	119599271	-	1570	sense_overlapping	long intergenic non-protein coding RNA 622 [Source:HGNC Symbol;Acc:HGNC:44251]	-	0	8	0	0.231888
ENSG00000229582	5.99704	63.869	0.0127308	0.32217	AL358074.1	9	125743754	125746552	-	2390	processed_transcript	uncharacterized LOC51145 [Source:NCBI gene;Acc:51145]	-	8	0	0.141029	0
ENSG00000280057	-6.04816	66.1724	0.0127308	0.32217	AL022069.2	6	166388136	166389920	+	1785	TEC	TEC	-	0	8	0	0.203957
ENSG00000162951	-6.04816	66.1724	0.0127308	0.32217	LRRTM1	2	80288351	80304749	-	5044	protein_coding	leucine rich repeat transmembrane neuronal 1 [Source:HGNC Symbol;Acc:HGNC:19408]	-	0	8	0	0.0721776
ENSG00000268744	-6.04816	66.1724	0.0127308	0.32217	AC008758.4	19	12379189	12401274	-	2593	protein_coding	novel transcript	-	0	8	0	0.140403
ENSG00000243018	5.99704	63.869	0.0127308	0.32217	AC005486.1	7	151249325	151254390	+	216	antisense	novel transcript	-	8	0	1.56047	0
ENSG00000273432	5.99704	63.869	0.0127308	0.32217	AC004951.4	7	43951910	44019151	-	2076	processed_transcript	novel transcript, POLR2J4 pseudogene-RASA4 pseudogene readthrough	-	8	0	0.162361	0
ENSG00000273183	-6.04816	66.1724	0.0127308	0.32217	AC093726.2	7	154956429	154957107	+	679	antisense	novel transcript, antisense to PAXIP1	-	0	8	0	0.536177
ENSG00000279878	-6.04816	66.1724	0.0127308	0.32217	AP003108.5	11	61525708	61526602	-	895	TEC	novel transcript	-	0	8	0	0.406775
ENSG00000230673	-6.04816	66.1724	0.0127308	0.32217	PABPC1P3	X	74583088	74583546	-	459	processed_pseudogene	poly(A) binding protein cytoplasmic 1 pseudogene 3 [Source:HGNC Symbol;Acc:HGNC:8560]	-	0	8	0	0.793168
ENSG00000228817	5.99704	63.869	0.0127308	0.32217	BACH1-IT2	21	29370497	29373709	+	1291	lincRNA	BACH1 intronic transcript 2 [Source:HGNC Symbol;Acc:HGNC:40007]	-	8	0	0.261085	0
ENSG00000269699	-6.04816	66.1724	0.0127308	0.32217	ZIM2	19	56774547	56840729	-	3066	protein_coding	zinc finger imprinted 2 [Source:HGNC Symbol;Acc:HGNC:12875]	zf-C2H2	0	8	0	0.118742
ENSG00000196796	-6.04816	66.1724	0.0127308	0.32217	NPIPB10P	16	29038655	29052726	+	1354	unprocessed_pseudogene	nuclear pore complex interacting protein family, member B10, pseudogene [Source:HGNC Symbol;Acc:HGNC:37455]	-	0	8	0	0.26888
ENSG00000175779	-6.04816	66.1724	0.0127308	0.32217	C15orf53	15	38628005	39180499	+	8469	protein_coding	chromosome 15 open reading frame 53 [Source:HGNC Symbol;Acc:HGNC:33796]	-	0	8	0	0.0429878
ENSG00000221055	-6.04816	66.1724	0.0127308	0.32217	MIR1302-3	2	113582959	113583096	-	138	miRNA	microRNA 1302-3 [Source:HGNC Symbol;Acc:HGNC:35295]	-	0	8	0	2.63814
ENSG00000274330	-6.04816	66.1724	0.0127308	0.32217	AL160191.3	14	70230224	70232426	+	2203	unprocessed_pseudogene	ADAM metallopeptidase domain 20 (ADAM20) pseudogene	-	0	8	0	0.165258
ENSG00000184221	-6.04816	66.1724	0.0127308	0.32217	OLIG1	21	33070144	33072420	+	2277	protein_coding	oligodendrocyte transcription factor 1 [Source:HGNC Symbol;Acc:HGNC:16983]	bHLH	0	8	0	0.159888
ENSG00000113262	-6.04816	66.1724	0.0127308	0.32217	GRM6	5	178977587	178996206	-	8282	protein_coding	glutamate metabotropic receptor 6 [Source:HGNC Symbol;Acc:HGNC:4598]	-	0	8	0	0.0439585
ENSG00000256906	-6.04816	66.1724	0.0127308	0.32217	LINC02419	12	130070325	130072685	+	1713	lincRNA	long intergenic non-protein coding RNA 2419 [Source:HGNC Symbol;Acc:HGNC:53349]	-	0	8	0	0.21253
ENSG00000182557	-6.04816	66.1724	0.0127308	0.32217	SPNS3	17	4433688	4488208	+	2684	protein_coding	sphingolipid transporter 3 (putative) [Source:HGNC Symbol;Acc:HGNC:28433]	-	0	8	0	0.135642
ENSG00000125997	-6.04816	66.1724	0.0127308	0.32217	BPIFB9P	20	33347720	33354444	+	1611	transcribed_unitary_pseudogene	BPI fold containing family B member 9, pseudogene [Source:HGNC Symbol;Acc:HGNC:16109]	-	0	8	0	0.225986
ENSG00000273674	-6.04816	66.1724	0.0127308	0.32217	AC021752.1	15	50839875	50908599	-	2669	lincRNA	novel transcript	-	0	8	0	0.136405
ENSG00000251314	5.99704	63.869	0.0127308	0.32217	AC104123.1	5	95962001	96631085	+	1488	antisense	uncharacterized LOC101929710 [Source:NCBI gene;Acc:101929710]	-	8	0	0.226519	0
ENSG00000235354	-6.04816	66.1724	0.0127308	0.32217	RPS29P16	7	103348601	103348771	+	171	processed_pseudogene	ribosomal protein S29 pseudogene 16 [Source:HGNC Symbol;Acc:HGNC:35560]	-	0	8	0	2.12903
ENSG00000253414	5.99704	63.869	0.0127308	0.32217	AC124067.2	8	37516410	37517021	-	510	sense_intronic	novel transcript	-	8	0	0.660903	0
ENSG00000253433	-6.04816	66.1724	0.0127308	0.32217	NCRNA00250	8	134838069	134842637	+	519	lincRNA	non-protein coding RNA 250 [Source:NCBI gene;Acc:552853]	-	0	8	0	0.701472
ENSG00000273327	5.99704	63.869	0.0127308	0.32217	OR6L2P	10	133430394	133431318	-	925	unprocessed_pseudogene	olfactory receptor family 6 subfamily L member 2 pseudogene [Source:HGNC Symbol;Acc:HGNC:15125]	-	8	0	0.36439	0
ENSG00000100884	5.99704	63.869	0.0127308	0.32217	CPNE6	14	24070837	24078100	+	5996	protein_coding	copine 6 [Source:HGNC Symbol;Acc:HGNC:2319]	-	8	0	0.0562142	0
ENSG00000254527	-6.04816	66.1724	0.0127308	0.32217	ENPP7P12	8	12205759	12206389	-	631	processed_pseudogene	ectonucleotide pyrophosphatase/phosphodiesterase 7 pseudogene 12 [Source:HGNC Symbol;Acc:HGNC:48697]	-	0	8	0	0.576964
ENSG00000242551	-6.04816	66.1724	0.0127308	0.32217	POU5F1P6	3	128674735	128677005	-	990	unprocessed_pseudogene	POU class 5 homeobox 1 pseudogene 6 [Source:HGNC Symbol;Acc:HGNC:33312]	-	0	8	0	0.367741
ENSG00000274833	5.99704	63.869	0.0127308	0.32217	AC110285.5	17	81387415	81387766	+	352	lincRNA	novel transcript	-	8	0	0.957558	0
ENSG00000273897	-6.04816	66.1724	0.0127308	0.32217	AC211476.3	7	73037371	73049246	+	715	unprocessed_pseudogene	PMS2 postmeiotic segregation increased 2 (S. cerevisiae) (PMS2) pseudogene	-	0	8	0	0.50918
ENSG00000225385	-6.04816	66.1724	0.0127308	0.32217	AL353572.1	9	88066915	88068037	+	417	processed_pseudogene	proline-rich nuclear receptor coactivator 2 (PNRC2) pseudogene	-	0	8	0	0.873055
ENSG00000264044	-6.04816	66.1724	0.0127308	0.32217	AC005726.2	17	28633206	28635950	+	1515	antisense	novel transcript, antisense to KIAA0100	-	0	8	0	0.240306
ENSG00000223553	-6.04816	66.1724	0.0127308	0.32217	SMPD4P1	22	20602595	20656914	-	3971	transcribed_unprocessed_pseudogene	sphingomyelin phosphodiesterase 4 pseudogene 1 [Source:HGNC Symbol;Acc:HGNC:39673]	-	0	8	0	0.0916807
ENSG00000236577	-6.04816	66.1724	0.0127308	0.32217	SNRPGP14	13	49488970	49489364	+	219	processed_pseudogene	small nuclear ribonucleoprotein polypeptide G pseudogene 14 [Source:HGNC Symbol;Acc:HGNC:42039]	-	0	8	0	1.66239
ENSG00000271734	5.99704	63.869	0.0127308	0.32217	Z98200.1	6	108030249	108030718	-	470	lincRNA	novel transcript	-	8	0	0.71715	0
ENSG00000275110	-6.04816	66.1724	0.0127308	0.32217	MIR6087	X	109054542	109054590	+	49	miRNA	microRNA 6087 [Source:HGNC Symbol;Acc:HGNC:50045]	-	0	8	0	7.42988
ENSG00000279029	-6.04816	66.1724	0.0127308	0.32217	AL353583.1	10	24481180	24483034	-	1855	TEC	TEC	-	0	8	0	0.196261
ENSG00000274937	-6.04816	66.1724	0.0127308	0.32217	AC090826.2	15	74374678	74375511	+	834	lincRNA	novel transcript	-	0	8	0	0.436528
ENSG00000238034	-6.04816	66.1724	0.0127308	0.32217	AL109807.1	20	21947647	21970783	+	569	lincRNA	novel transcript	-	0	8	0	0.639831
ENSG00000267626	-6.04816	66.1724	0.0127308	0.32217	AC002115.1	19	35608285	35612666	-	568	lincRNA	novel transcript	-	0	8	0	0.640958
ENSG00000202408	-6.04816	66.1724	0.0127308	0.32217	RNU1-122P	1	148334612	148334767	-	156	snRNA	RNA, U1 small nuclear 122, pseudogene [Source:HGNC Symbol;Acc:HGNC:48464]	-	0	8	0	2.33374
ENSG00000249956	-6.04816	66.1724	0.0127308	0.32217	UGT2B24P	4	69408828	69423164	+	1597	processed_pseudogene	UDP glucuronosyltransferase family 2 member B24, pseudogene [Source:HGNC Symbol;Acc:HGNC:12548]	-	0	8	0	0.227967
ENSG00000235268	5.99704	63.869	0.0127308	0.32217	KDM4E	11	95025258	95027596	+	2339	protein_coding	lysine demethylase 4E [Source:HGNC Symbol;Acc:HGNC:37098]	-	8	0	0.144105	0
ENSG00000263723	-6.04816	66.1724	0.0127308	0.32217	RF00157	2	237869904	237869982	+	79	snoRNA		-	0	8	0	4.6084
ENSG00000235861	-6.04816	66.1724	0.0127308	0.32217	AC005237.2	2	241118725	241118943	+	219	processed_pseudogene	zinc finger CCCH-type containing 12A (ZC3H12A) pseudogene	-	0	8	0	1.66239
ENSG00000238444	-6.04816	66.1724	0.0127308	0.32217	RNU6-893P	11	112032499	112032598	-	100	snRNA	RNA, U6 small nuclear 893, pseudogene [Source:HGNC Symbol;Acc:HGNC:47856]	-	0	8	0	3.64064
ENSG00000284711	-6.04816	66.1724	0.0127308	0.32217	AC010325.3	19	50808145	50812707	-	394	unitary_pseudogene	novel pseudogene	-	0	8	0	0.92402
ENSG00000276160	5.99704	63.869	0.0127308	0.32217	GGTLC5P	22	18340145	18345899	+	998	unprocessed_pseudogene	gamma-glutamyltransferase light chain 5 pseudogene [Source:HGNC Symbol;Acc:HGNC:33427]	-	8	0	0.337736	0
ENSG00000279933	-6.04816	66.1724	0.0127308	0.32217	AL031595.1	22	44183031	44187739	-	4709	TEC	TEC	-	0	8	0	0.0773124
ENSG00000236255	-1.26583	2.40465	0.0127606	0.322463	AC009404.1	2	117833937	117841658	+	4058	lincRNA	novel transcript	-	37	86	0.384156	0.964438
ENSG00000169302	-1.24414	2.36877	0.0128455	0.322463	STK32A	5	147234963	147387852	+	7913	protein_coding	serine/threonine kinase 32A [Source:HGNC Symbol;Acc:HGNC:28317]	-	38	87	0.20233	0.500341
ENSG00000166762	-1.12562	2.18196	0.0128478	0.322463	CATSPER2	15	43628503	43668118	-	8100	protein_coding	cation channel sperm associated 2 [Source:HGNC Symbol;Acc:HGNC:18810]	-	94	198	0.488946	1.11242
ENSG00000091844	-1.33437	2.52165	0.0128535	0.322463	RGS17	6	153004459	153131249	-	7899	protein_coding	regulator of G protein signaling 17 [Source:HGNC Symbol;Acc:HGNC:14088]	-	25	61	0.133348	0.351435
ENSG00000070778	1.04529	2.06378	0.0129086	0.322463	PTPN21	14	88465778	88554733	-	7396	protein_coding	protein tyrosine phosphatase, non-receptor type 21 [Source:HGNC Symbol;Acc:HGNC:9651]	-	1318	616	7.50821	3.79028
ENSG00000124126	1.12854	2.18638	0.0130317	0.322463	PREX1	20	48624252	48827883	-	7393	protein_coding	phosphatidylinositol-3,4,5-trisphosphate dependent Rac exchange factor 1 [Source:HGNC Symbol;Acc:HGNC:32594]	-	220	97	1.25378	0.597089
ENSG00000170260	1.06056	2.08574	0.013069	0.322463	ZNF212	7	149239651	149255609	+	3182	protein_coding	zinc finger protein 212 [Source:HGNC Symbol;Acc:HGNC:13004]	zf-C2H2	625	289	8.27557	4.13319
ENSG00000198756	1.67162	3.18571	0.0131493	0.322463	COLGALT2	1	183929854	184037729	-	7806	protein_coding	collagen beta(1-O)galactosyltransferase 2 [Source:HGNC Symbol;Acc:HGNC:16790]	-	30	9	0.161924	0.0524689
ENSG00000188659	-1.77451	3.42123	0.0131493	0.322463	SAXO2	15	82262810	82284930	+	4160	protein_coding	stabilizer of axonemal microtubules 2 [Source:HGNC Symbol;Acc:HGNC:33727]	-	9	30	0.0911522	0.328183
ENSG00000129214	1.67162	3.18571	0.0131493	0.322463	SHBG	17	7613946	7633383	+	1972	protein_coding	sex hormone binding globulin [Source:HGNC Symbol;Acc:HGNC:10839]	-	30	9	0.640962	0.207694
ENSG00000273002	-1.77451	3.42123	0.0131493	0.322463	AL355388.2	1	155978799	155982986	+	2157	antisense	uncharacterized LOC107985209 [Source:NCBI gene;Acc:107985209]	-	9	30	0.175796	0.632935
ENSG00000203684	-1.77451	3.42123	0.0131493	0.322463	IBA57-DT	1	228164086	228165512	-	641	lincRNA	IBA57 divergent transcript [Source:HGNC Symbol;Acc:HGNC:32062]	-	9	30	0.591565	2.12986
ENSG00000270589	-1.77451	3.42123	0.0131493	0.322463	AL158163.1	10	110910596	110912244	+	1649	antisense	novel transcript, antisense to BBIP1	-	9	30	0.229953	0.82792
ENSG00000267508	-1.11747	2.16967	0.0131495	0.322463	ZNF285	19	44382298	44401608	-	6866	protein_coding	zinc finger protein 285 [Source:HGNC Symbol;Acc:HGNC:13079]	zf-C2H2	106	222	0.650459	1.47142
ENSG00000236438	-1.11747	2.16967	0.0131495	0.322463	FAM157A	3	198153287	198222513	+	7091	transcribed_unprocessed_pseudogene	family with sequence similarity 157 member A [Source:HGNC Symbol;Acc:HGNC:34079]	-	106	222	0.62982	1.42473
ENSG00000127955	1.0406	2.05708	0.0132214	0.322463	GNAI1	7	79768028	80226181	+	24206	protein_coding	G protein subunit alpha i1 [Source:HGNC Symbol;Acc:HGNC:4384]	-	1608	754	2.79886	1.41754
ENSG00000198835	1.9922	3.97844	0.0132311	0.322463	GJC2	1	228149852	228159826	+	2243	protein_coding	gap junction protein gamma 2 [Source:HGNC Symbol;Acc:HGNC:17494]	-	21	5	0.394464	0.101444
ENSG00000242282	-2.09445	4.27064	0.0132311	0.322463	AC108488.1	2	3531813	3536873	-	1532	lincRNA	novel transcript	-	5	21	0.137508	0.623804
ENSG00000043039	-2.09445	4.27064	0.0132311	0.322463	BARX2	11	129375940	129452279	+	3660	protein_coding	BARX homeobox 2 [Source:HGNC Symbol;Acc:HGNC:956]	Homeobox	5	21	0.0575581	0.261111
ENSG00000265055	-2.09445	4.27064	0.0132311	0.322463	AC145343.1	17	68096046	68101474	-	650	lincRNA	novel transcript	-	5	21	0.324097	1.47026
ENSG00000267649	-2.09445	4.27064	0.0132311	0.322463	AC010327.4	19	55216660	55221616	+	1577	lincRNA	novel transcript	-	5	21	0.133585	0.606004
ENSG00000261064	-2.09445	4.27064	0.0132311	0.322463	LINC02256	15	32536047	32587613	+	909	lincRNA	long intergenic non-protein coding RNA 2256 [Source:HGNC Symbol;Acc:HGNC:53157]	-	5	21	0.231752	1.05134
ENSG00000255966	-2.09445	4.27064	0.0132311	0.322463	AC006064.3	12	6532290	6533498	-	477	antisense	novel transcript	-	5	21	0.441641	2.0035
ENSG00000167800	-2.09445	4.27064	0.0132311	0.322463	TBX10	11	67631303	67639560	-	1548	protein_coding	T-box 10 [Source:HGNC Symbol;Acc:HGNC:11593]	T-box	5	21	0.136087	0.617357
ENSG00000207554	-1.50393	2.83615	0.0132402	0.322463	MIR647	20	63942631	63942726	-	96	miRNA	microRNA 647 [Source:HGNC Symbol;Acc:HGNC:32903]	-	16	44	7.02209	20.8578
ENSG00000255100	-1.50393	2.83615	0.0132402	0.322463	AP003119.2	11	76782581	76783062	-	354	antisense	uncharacterized LOC101928837 [Source:NCBI gene;Acc:101928837]	-	16	44	1.9043	5.65636
ENSG00000228409	-1.11245	2.16213	0.0133379	0.322463	CCT6P1	7	65751142	65763354	+	1670	transcribed_unprocessed_pseudogene	chaperonin containing TCP1 subunit 6 pseudogene 1 [Source:HGNC Symbol;Acc:HGNC:33094]	-	115	240	2.90134	6.54007
ENSG00000166323	-1.2987	2.46008	0.0133728	0.322463	C11orf65	11	108308519	108467531	-	3524	protein_coding	chromosome 11 open reading frame 65 [Source:HGNC Symbol;Acc:HGNC:28519]	-	29	69	0.346721	0.891048
ENSG00000198681	1.06674	2.0947	0.0133993	0.322463	MAGEA1	X	153179285	153183880	+	1710	protein_coding	MAGE family member A1 [Source:HGNC Symbol;Acc:HGNC:6796]	-	543	250	13.3789	6.65322
ENSG00000093144	3.25707	9.56043	0.0134121	0.322463	ECHDC1	6	127288710	127343609	-	5678	protein_coding	ethylmalonyl-CoA decarboxylase 1 [Source:HGNC Symbol;Acc:HGNC:21489]	-	11	1	0.0816235	0.00801479
ENSG00000229852	3.25707	9.56043	0.0134121	0.322463	AC019205.1	6	73263215	73301401	+	6660	antisense	novel transcript, antisense to KHDC1	-	11	1	0.0695883	0.00683303
ENSG00000198108	3.25707	9.56043	0.0134121	0.322463	CHSY3	5	129904472	130186634	+	3938	protein_coding	chondroitin sulfate synthase 3 [Source:HGNC Symbol;Acc:HGNC:24293]	-	11	1	0.117689	0.0115561
ENSG00000230555	-3.35455	10.2287	0.0134121	0.322463	AL450326.1	10	43420738	43422100	+	760	lincRNA	novel transcript	-	1	11	0.0554376	0.658668
ENSG00000131634	-3.35455	10.2287	0.0134121	0.322463	TMEM204	16	1528688	1555580	+	2047	protein_coding	transmembrane protein 204 [Source:HGNC Symbol;Acc:HGNC:14158]	-	1	11	0.0205826	0.244547
ENSG00000219410	3.25707	9.56043	0.0134121	0.322463	AC125494.1	12	6663260	6672069	+	2399	bidirectional_promoter_lncRNA	novel transcript	-	11	1	0.193188	0.0189696
ENSG00000261542	-3.35455	10.2287	0.0134121	0.322463	AC011978.2	8	63215981	63218034	+	2054	lincRNA	novel transcript	-	1	11	0.0205124	0.243714
ENSG00000258096	3.25707	9.56043	0.0134121	0.322463	AC025031.2	12	46371463	46373778	+	627	antisense	novel transcript, antisense to SLC38A2	-	11	1	0.739168	0.0725805
ENSG00000260949	3.25707	9.56043	0.0134121	0.322463	AP006545.1	8	38062881	38063791	+	911	sense_overlapping	novel transcript, overlapping to EIF4EBP1	-	11	1	0.508736	0.0499539
ENSG00000196341	-3.35455	10.2287	0.0134121	0.322463	OR8D1	11	124302831	124315099	-	8507	protein_coding	olfactory receptor family 8 subfamily D member 1 [Source:HGNC Symbol;Acc:HGNC:8481]	-	1	11	0.00495269	0.0588442
ENSG00000231083	3.25707	9.56043	0.0134121	0.322463	AC011747.1	2	8600892	8622942	-	565	lincRNA	novel transcript	-	11	1	0.82028	0.0805451
ENSG00000233766	3.25707	9.56043	0.0134121	0.322463	AC098617.1	2	191846539	192044525	+	5155	antisense	novel transcript, antisense to TMEFF2	-	11	1	0.0899046	0.00882793
ENSG00000249502	-3.35455	10.2287	0.0134121	0.322463	AC006160.1	4	17587467	17614571	-	750	antisense	novel transcript	-	1	11	0.0561767	0.667451
ENSG00000255154	-3.35455	10.2287	0.0134121	0.322463	HTD2	3	58306262	58318574	+	2119	protein_coding	hydroxyacyl-thioester dehydratase type 2 [Source:HGNC Symbol;Acc:HGNC:53111]	-	1	11	0.0198832	0.236238
ENSG00000251301	-3.35455	10.2287	0.0134121	0.322463	LINC02384	12	68332888	68451663	-	2695	lincRNA	long intergenic non-protein coding RNA 2384 [Source:HGNC Symbol;Acc:HGNC:53308]	-	1	11	0.0156336	0.185747
ENSG00000212175	-3.35455	10.2287	0.0134121	0.322463	RF00586	2	55565703	55565850	+	148	snoRNA		-	1	11	0.284679	3.38235
ENSG00000201544	3.25707	9.56043	0.0134121	0.322463	SNORA16B	1	212352816	212352950	+	135	snoRNA	small nucleolar RNA, H/ACA box 16B [Source:HGNC Symbol;Acc:HGNC:32606]	-	11	1	3.43302	0.337096
ENSG00000285857	-3.35455	10.2287	0.0134121	0.322463	AC016727.3	2	61527340	61529160	+	1266	antisense	novel transcript, antisense to XPO1	-	1	11	0.0332801	0.395409
ENSG00000227769	3.25707	9.56043	0.0134121	0.322463	AC072062.1	2	215004782	215085488	+	3813	antisense	novel transcript, antisense to ABCA12	-	11	1	0.121547	0.011935
ENSG00000252213	-3.35455	10.2287	0.0134121	0.322463	SNORA74D	5	139276180	139276320	+	141	snoRNA	small nucleolar RNA, H/ACA box 74D [Source:HGNC Symbol;Acc:HGNC:52219]	-	1	11	0.298812	3.55027
ENSG00000166090	-3.35455	10.2287	0.0134121	0.322463	IL25	14	23372809	23376403	+	1367	protein_coding	interleukin 25 [Source:HGNC Symbol;Acc:HGNC:13765]	-	1	11	0.0308212	0.366195
ENSG00000236051	-3.35455	10.2287	0.0134121	0.322463	MYCBP2-AS1	13	77026767	77129717	+	4087	processed_transcript	MYCBP2 antisense RNA 1 [Source:HGNC Symbol;Acc:HGNC:41023]	-	1	11	0.0103089	0.122483
ENSG00000231942	-3.35455	10.2287	0.0134121	0.322463	HNRNPA1P36	8	81807772	81808726	+	955	processed_pseudogene	heterogeneous nuclear ribonucleoprotein A1 pseudogene 36 [Source:HGNC Symbol;Acc:HGNC:48765]	-	1	11	0.0441179	0.524176
ENSG00000257809	-3.35455	10.2287	0.0134121	0.322463	AC034102.5	12	56150796	56158220	-	540	antisense	novel transcript, antisense to MYL6B	-	1	11	0.0780233	0.927015
ENSG00000168491	-1.16263	2.23865	0.0134244	0.322463	CCDC110	4	185445182	185471759	-	3388	protein_coding	coiled-coil domain containing 110 [Source:HGNC Symbol;Acc:HGNC:28504]	-	68	147	0.845636	1.97452
ENSG00000254473	-1.11697	2.16891	0.0134837	0.323384	AL354920.1	9	83707594	83713378	+	1134	antisense	uncharacterized LOC105376114 [Source:NCBI gene;Acc:105376114]	-	96	201	3.56678	8.06623
ENSG00000006283	1.43903	2.71138	0.013488	0.323384	CACNA1G	17	50561068	50627474	+	9709	protein_coding	calcium voltage-gated channel subunit alpha1 G [Source:HGNC Symbol;Acc:HGNC:1394]	-	48	17	0.208298	0.0796824
ENSG00000180066	-1.11567	2.16696	0.013528	0.324039	C10orf91	10	132444327	132449408	+	2040	lincRNA	chromosome 10 open reading frame 91 (putative) [Source:HGNC Symbol;Acc:HGNC:27275]	-	98	205	2.02402	4.57311
ENSG00000154162	1.20653	2.30781	0.0136066	0.325472	CDH12	5	21750673	22853622	-	5928	protein_coding	cadherin 12 [Source:HGNC Symbol;Acc:HGNC:1751]	-	115	48	0.817349	0.368486
ENSG00000166352	-1.09989	2.14338	0.0136134	0.325472	C11orf74	11	36594493	36659290	+	1474	protein_coding	chromosome 11 open reading frame 74 [Source:HGNC Symbol;Acc:HGNC:25142]	-	131	271	3.74448	8.3668
ENSG00000167315	-1.11151	2.16072	0.0136706	0.326535	ACAA2	18	49782167	49813960	-	5072	protein_coding	acetyl-CoA acyltransferase 2 [Source:HGNC Symbol;Acc:HGNC:83]	-	105	219	0.872224	1.96495
ENSG00000273154	-1.67164	3.18576	0.013705	0.326745	AL121845.3	20	63708864	63739103	+	3190	protein_coding	novel protein, ZGPAT-LIME1 readthrough	-	10	31	0.132077	0.442241
ENSG00000232721	-1.67164	3.18576	0.013705	0.326745	AC239800.2	1	143736066	143739506	+	2675	lincRNA	novel transcript	-	10	31	0.157505	0.527382
ENSG00000008128	-1.26508	2.40341	0.0138481	0.329849	CDK11A	1	1702730	1724324	-	4701	protein_coding	cyclin dependent kinase 11A [Source:HGNC Symbol;Acc:HGNC:1730]	-	34	79	0.304724	0.764759
ENSG00000280120	-1.24898	2.37673	0.0140684	0.334361	AC073857.1	12	123152324	123153377	-	1054	TEC	novel transcript	-	37	85	1.47904	3.67
ENSG00000274667	-1.42467	2.68454	0.0140899	0.334361	AC090517.2	15	56729932	56730611	-	680	sense_intronic	novel transcript, sense intronic to	-	20	52	1.23919	3.48002
ENSG00000116652	-1.42467	2.68454	0.0140899	0.334361	DLEU2L	1	63547082	63550636	+	3555	sense_intronic	deleted in lymphocytic leukemia 2-like [Source:HGNC Symbol;Acc:HGNC:13225]	-	20	52	0.237033	0.665658
ENSG00000205863	-1.42467	2.68454	0.0140899	0.334361	C1QTNF9B	13	23890525	23902655	-	2196	protein_coding	C1q and TNF related 9B [Source:HGNC Symbol;Acc:HGNC:34072]	-	20	52	0.383721	1.0776
ENSG00000245848	1.04667	2.06575	0.0141431	0.335311	CEBPA	19	33299934	33302564	-	2631	protein_coding	CCAAT enhancer binding protein alpha [Source:HGNC Symbol;Acc:HGNC:1833]	C/EBP	634	296	10.1528	5.11987
ENSG00000105855	-1.62564	3.08578	0.0141787	0.335532	ITGB8	7	20330702	20415754	+	15156	protein_coding	integrin subunit beta 8 [Source:HGNC Symbol;Acc:HGNC:6163]	-	11	33	0.0305792	0.0990871
ENSG00000173678	-1.62564	3.08578	0.0141787	0.335532	SPDYE2B	7	102650325	102661398	+	2072	protein_coding	speedy/RINGO cell cycle regulator family member E2B [Source:HGNC Symbol;Acc:HGNC:48334]	-	11	33	0.223677	0.72479
ENSG00000196872	-1.40904	2.65561	0.0142524	0.336341	KIAA1211L	2	98793846	98936259	-	4705	protein_coding	KIAA1211 like [Source:HGNC Symbol;Acc:HGNC:33454]	-	21	54	0.188052	0.522302
ENSG00000227214	-1.40904	2.65561	0.0142524	0.336341	HCG15	6	28986203	28987484	+	1032	antisense	HLA complex group 15 [Source:HGNC Symbol;Acc:HGNC:18361]	-	21	54	0.857349	2.38123
ENSG00000186777	-1.40904	2.65561	0.0142524	0.336341	ZNF732	4	270675	305321	-	2193	protein_coding	zinc finger protein 732 [Source:HGNC Symbol;Acc:HGNC:37138]	zf-C2H2	21	54	0.403458	1.12058
ENSG00000029639	-1.07423	2.1056	0.0143262	0.33777	TFB1M	6	155257509	155314493	-	2736	protein_coding	transcription factor B1, mitochondrial [Source:HGNC Symbol;Acc:HGNC:17037]	-	156	317	2.4023	5.27267
ENSG00000181619	-1.20819	2.31048	0.0144083	0.338766	GPR135	14	59429022	59465342	-	4977	protein_coding	G protein-coupled receptor 135 [Source:HGNC Symbol;Acc:HGNC:19991]	-	43	96	0.364014	0.877791
ENSG00000137834	1.03129	2.04385	0.014445	0.338766	SMAD6	15	66702228	66782848	+	8563	protein_coding	SMAD family member 6 [Source:HGNC Symbol;Acc:HGNC:6772]	MH1	1229	580	6.04705	3.08241
ENSG00000244586	2.3167	4.98191	0.0144854	0.338766	WNT5A-AS1	3	55487699	55488308	+	500	antisense	WNT5A antisense RNA 1 [Source:HGNC Symbol;Acc:HGNC:40616]	-	16	3	1.34824	0.273048
ENSG00000279539	-2.41804	5.34446	0.0144854	0.338766	AC006486.2	19	42242775	42244973	+	2199	TEC	TEC	-	3	16	0.0574796	0.331118
ENSG00000111644	-2.41804	5.34446	0.0144854	0.338766	ACRBP	12	6638075	6647460	-	2843	protein_coding	acrosin binding protein [Source:HGNC Symbol;Acc:HGNC:17195]	-	3	16	0.0444593	0.256113
ENSG00000236896	-2.41804	5.34446	0.0144854	0.338766	AL354726.1	9	97986551	97987656	-	402	antisense	novel transcript	-	3	16	0.314422	1.81126
ENSG00000284624	-2.41804	5.34446	0.0144854	0.338766	AC092902.5	3	125766516	125852936	+	4236	processed_transcript	novel transcript	-	3	16	0.0298389	0.17189
ENSG00000087250	-2.41804	5.34446	0.0144854	0.338766	MT3	16	56589074	56591088	+	1837	protein_coding	metallothionein 3 [Source:HGNC Symbol;Acc:HGNC:7408]	-	3	16	0.0688066	0.396368
ENSG00000177614	1.32679	2.50845	0.0145328	0.338766	PGBD5	1	230314482	230426371	-	11304	protein_coding	piggyBac transposable element derived 5 [Source:HGNC Symbol;Acc:HGNC:19405]	-	60	23	0.223634	0.0925941
ENSG00000157873	-1.38142	2.60525	0.0145328	0.338766	TNFRSF14	1	2555639	2565382	+	6219	protein_coding	TNF receptor superfamily member 14 [Source:HGNC Symbol;Acc:HGNC:11912]	-	23	58	0.155821	0.424419
ENSG00000165995	-1.11862	2.1714	0.0145346	0.338766	CACNB2	10	18140677	18543557	+	8955	protein_coding	calcium voltage-gated channel auxiliary subunit beta 2 [Source:HGNC Symbol;Acc:HGNC:1402]	-	83	174	0.390508	0.884242
ENSG00000143847	-1.19852	2.29505	0.0145409	0.338766	PPFIA4	1	203026498	203078740	+	9707	protein_coding	PTPRF interacting protein alpha 4 [Source:HGNC Symbol;Acc:HGNC:9248]	-	46	102	0.19966	0.478193
ENSG00000176700	-1.19852	2.29505	0.0145409	0.338766	SCAND2P	15	84631451	84647478	+	10717	transcribed_unprocessed_pseudogene	SCAN domain containing 2 pseudogene [Source:HGNC Symbol;Acc:HGNC:10567]	-	46	102	0.180843	0.433126
ENSG00000267317	1.20889	2.3116	0.0145808	0.338836	AC027307.2	19	1457670	1458580	-	911	antisense	novel transcript, antisense to APC2	-	108	45	4.99486	2.24793
ENSG00000196218	-1.58607	3.00229	0.0145837	0.338836	RYR1	19	38433699	38587564	+	15965	protein_coding	ryanodine receptor 1 [Source:HGNC Symbol;Acc:HGNC:10483]	-	12	35	0.0316687	0.099767
ENSG00000269894	-1.58607	3.00229	0.0145837	0.338836	AC018809.1	3	9935706	9936258	+	553	sense_intronic	novel transcript, sense intronic to CRELD1	-	12	35	0.914269	2.88025
ENSG00000268218	-1.31057	2.4804	0.014654	0.340159	AC137932.3	16	89268104	89273044	+	3660	antisense	novel transcript, antisense to ANKRD11	-	25	60	0.287791	0.746033
ENSG00000277053	1.04038	2.05677	0.0146956	0.340814	GTF2IP1	7	75185385	75237696	-	7453	transcribed_unprocessed_pseudogene	general transcription factor IIi pseudogene 1 [Source:HGNC Symbol;Acc:HGNC:4660]	-	708	332	4.0024	2.02719
ENSG00000186583	-1.29301	2.45038	0.0148649	0.34315	SPATC1	8	144012414	144047085	+	2007	protein_coding	spermatogenesis and centriole associated 1 [Source:HGNC Symbol;Acc:HGNC:30510]	-	27	64	0.566806	1.45118
ENSG00000280881	-1.09505	2.13621	0.0149021	0.34315	AC060814.5	15	21328380	21343881	-	752	lincRNA	novel transcript	-	113	233	6.33109	14.1002
ENSG00000080822	-1.02529	2.03536	0.0149051	0.34315	CLDND1	3	98497912	98523066	-	5217	protein_coding	claudin domain containing 1 [Source:HGNC Symbol;Acc:HGNC:1322]	-	605	1188	4.88599	10.3629
ENSG00000138668	1.01067	2.01484	0.0149078	0.34315	HNRNPD	4	82352498	82374503	-	6981	protein_coding	heterogeneous nuclear ribonucleoprotein D [Source:HGNC Symbol;Acc:HGNC:5036]	-	8643	4138	52.1633	26.9749
ENSG00000156284	-1.16945	2.24926	0.0149144	0.34315	CLDN8	21	30214006	30216073	-	2068	protein_coding	claudin 8 [Source:HGNC Symbol;Acc:HGNC:2050]	-	58	126	1.18167	2.77273
ENSG00000079435	-1.55165	2.93152	0.014931	0.34315	LIPE	19	42401507	42427426	-	5206	protein_coding	lipase E, hormone sensitive type [Source:HGNC Symbol;Acc:HGNC:6621]	-	13	37	0.10521	0.323434
ENSG00000243753	-1.55165	2.93152	0.014931	0.34315	HLA-L	6	30259584	30293014	+	5505	transcribed_unprocessed_pseudogene	major histocompatibility complex, class I, L (pseudogene) [Source:HGNC Symbol;Acc:HGNC:4970]	-	13	37	0.0994956	0.305867
ENSG00000181908	-1.55165	2.93152	0.014931	0.34315	AP003774.1	11	64449074	64451657	+	2340	lincRNA	uncharacterized LOC100996455 [Source:NCBI gene;Acc:100996455]	-	13	37	0.23407	0.719571
ENSG00000273759	-1.55165	2.93152	0.014931	0.34315	AL117379.1	20	62928621	62929297	-	677	lincRNA	novel transcript	-	13	37	0.809045	2.48714
ENSG00000260708	-1.16754	2.24629	0.0149374	0.34315	AL118516.1	22	46761894	46762563	-	670	antisense	novel transcript, antisense to TBC1D22A	-	59	128	3.71018	8.69406
ENSG00000006652	-1.02424	2.03389	0.0149441	0.34315	IFRD1	7	112422968	112481017	+	7489	protein_coding	interferon related developmental regulator 1 [Source:HGNC Symbol;Acc:HGNC:5456]	-	635	1246	3.57246	7.5715
ENSG00000203709	-1.16217	2.23793	0.015001	0.344146	MIR29B2CHG	1	207801518	207879096	-	16425	lincRNA	MIR29B2 and MIR29C host gene [Source:HGNC Symbol;Acc:HGNC:32018]	-	62	134	0.159039	0.371268
ENSG00000104228	1.02715	2.038	0.0150206	0.344287	TRIM35	8	27284887	27311319	-	4269	protein_coding	tripartite motif containing 35 [Source:HGNC Symbol;Acc:HGNC:16285]	-	1029	487	10.1556	5.19147
ENSG00000250337	-1.27073	2.41283	0.015118	0.346209	PURPL	5	27472292	27496401	+	2638	lincRNA	p53 upregulated regulator of p53 levels [Source:HGNC Symbol;Acc:HGNC:48995]	-	30	70	0.479142	1.20757
ENSG00000245149	-1.26419	2.40192	0.0151887	0.347517	RNF139-AS1	8	124462485	124474576	-	6943	lincRNA	RNF139 antisense RNA 1 (head to head) [Source:HGNC Symbol;Acc:HGNC:48940]	-	31	72	0.188119	0.471925
ENSG00000183067	-1.52144	2.87077	0.0152297	0.347832	IGSF5	21	39745407	39802096	+	2650	protein_coding	immunoglobulin superfamily member 5 [Source:HGNC Symbol;Acc:HGNC:5952]	-	14	39	0.222587	0.66974
ENSG00000262188	-1.52144	2.87077	0.0152297	0.347832	LINC01978	17	79919357	79925462	+	1877	lincRNA	long intergenic non-protein coding RNA 1978 [Source:HGNC Symbol;Acc:HGNC:52806]	-	14	39	0.314255	0.945558
ENSG00000163993	-1.86949	3.65403	0.0153054	0.348624	S100P	4	6693069	6697170	+	1280	protein_coding	S100 calcium binding protein P [Source:HGNC Symbol;Acc:HGNC:10504]	-	7	25	0.230412	0.888828
ENSG00000128346	1.76683	3.40306	0.0153054	0.348624	C22orf23	22	37943050	37953669	-	2299	protein_coding	chromosome 22 open reading frame 23 [Source:HGNC Symbol;Acc:HGNC:18589]	-	25	7	0.458162	0.138563
ENSG00000232594	-1.86949	3.65403	0.0153054	0.348624	AC103563.4	2	94961047	94961503	-	368	unprocessed_pseudogene	immunoglobulin heavy variable group pseudogene	-	7	25	0.801435	3.09158
ENSG00000260261	-1.10706	2.15407	0.0153276	0.348819	AC124944.3	3	195913078	195954485	-	5485	transcribed_unprocessed_pseudogene	programmed cell death 6 (PDCD6) pseudogene	-	88	183	0.675964	1.51832
ENSG00000234965	1.45997	2.75102	0.0154873	0.351059	SHISA8	22	41909554	41914667	-	1405	protein_coding	shisa family member 8 [Source:HGNC Symbol;Acc:HGNC:18351]	-	43	15	1.28947	0.48585
ENSG00000227741	-1.4947	2.81805	0.0154873	0.351059	AL121987.2	1	160202199	160208869	-	1578	antisense	uncharacterized LOC729867 [Source:NCBI gene;Acc:729867]	-	15	41	0.4005	1.1824
ENSG00000112706	-1.4947	2.81805	0.0154873	0.351059	IMPG1	6	75921115	76072678	-	3801	protein_coding	interphotoreceptor matrix proteoglycan 1 [Source:HGNC Symbol;Acc:HGNC:6055]	-	15	41	0.166269	0.490878
ENSG00000267053	-1.4947	2.81805	0.0154873	0.351059	AC012617.1	19	36304580	36312668	+	2674	lincRNA	uncharacterized LOC100134317 [Source:NCBI gene;Acc:100134317]	-	15	41	0.236346	0.697767
ENSG00000245468	-1.08761	2.12521	0.0154948	0.351059	LINC02447	4	7094571	7103385	-	3763	lincRNA	long intergenic non-protein coding RNA 2447 [Source:HGNC Symbol;Acc:HGNC:53379]	-	117	240	1.30999	2.90245
ENSG00000163322	-1.0601	2.08508	0.0156094	0.353342	ABRAXAS1	4	83459517	83523348	-	7777	protein_coding	abraxas 1, BRCA1 A complex subunit [Source:HGNC Symbol;Acc:HGNC:25829]	-	164	330	0.888484	1.93103
ENSG00000251003	-1.19963	2.2968	0.0156537	0.354032	ZFPM2-AS1	8	105546089	106060524	-	2667	processed_transcript	ZFPM2 antisense RNA 1 [Source:HGNC Symbol;Acc:HGNC:50698]	-	41	91	0.647707	1.55277
ENSG00000246560	-1.47086	2.77187	0.0157099	0.35473	AC018797.2	4	102828055	102844075	+	883	antisense	uncharacterized LOC105377348 [Source:NCBI gene;Acc:105377348]	-	16	43	0.763444	2.21613
ENSG00000104356	1.02921	2.0409	0.0157123	0.35473	POP1	8	98117297	98159834	+	4852	protein_coding	POP1 homolog, ribonuclease P/MRP subunit [Source:HGNC Symbol;Acc:HGNC:30129]	-	711	336	6.174	3.15142
ENSG00000279528	1.17263	2.25422	0.0158881	0.35838	AC115618.3	X	48580741	48581165	+	425	TEC	TEC	-	117	50	11.5988	5.35388
ENSG00000224046	-1.44947	2.73108	0.0159028	0.358395	AC005076.1	7	87151423	87152420	-	888	antisense	uncharacterized LOC101927420 [Source:NCBI gene;Acc:101927420]	-	17	45	0.806592	2.30615
ENSG00000234797	-1.01196	2.01665	0.015966	0.359502	RPS3AP6	15	59768352	59769146	+	795	processed_pseudogene	ribosomal protein S3A pseudogene 6 [Source:HGNC Symbol;Acc:HGNC:18630]	-	643	1251	34.077	71.6107
ENSG00000117262	-1.04393	2.06183	0.0160122	0.360226	GPR89A	1	145607990	145670648	+	5557	protein_coding	G protein-coupled receptor 89A [Source:HGNC Symbol;Acc:HGNC:31984]	-	193	384	1.4633	3.1447
ENSG00000249087	-1.43018	2.69479	0.0160701	0.360479	ZNF436-AS1	1	23368997	23371839	+	2655	antisense	ZNF436 antisense RNA 1 [Source:HGNC Symbol;Acc:HGNC:25122]	-	18	47	0.285644	0.805603
ENSG00000253626	1.10744	2.15463	0.0160757	0.360479	EIF5AL1	10	79512601	79516440	+	3840	protein_coding	eukaryotic translation initiation factor 5A-like 1 [Source:HGNC Symbol;Acc:HGNC:17419]	-	190	85	2.08468	1.00734
ENSG00000247400	-1.0962	2.1379	0.016079	0.360479	DNAJC3-DT	13	95648733	95676925	-	3010	lincRNA	DNAJC3 divergent transcript [Source:HGNC Symbol;Acc:HGNC:39808]	-	94	194	1.31577	2.93307
ENSG00000135976	-1.08762	2.12523	0.0160799	0.360479	ANKRD36	2	97113496	97250199	+	9479	protein_coding	ankyrin repeat domain 36 [Source:HGNC Symbol;Acc:HGNC:24079]	-	97	199	0.431149	0.955385
ENSG00000266680	1.36689	2.57914	0.0162157	0.363202	AL135905.1	6	63571005	63572408	-	1404	antisense	novel transcript, antisense to PTP4A1	-	51	19	1.53046	0.615849
ENSG00000231689	-1.39673	2.63304	0.0163423	0.365718	LINC01090	2	187712816	188384313	-	1584	lincRNA	long intergenic non-protein coding RNA 1090 [Source:HGNC Symbol;Acc:HGNC:49201]	-	20	51	0.531977	1.46522
ENSG00000156509	-1.38214	2.60654	0.0164527	0.365881	FBXO43	8	100133360	100145800	-	3950	protein_coding	F-box protein 43 [Source:HGNC Symbol;Acc:HGNC:28521]	-	21	53	0.223996	0.610614
ENSG00000135097	1.02687	2.03759	0.0164697	0.365881	MSI1	12	120341330	120369180	-	3090	protein_coding	musashi RNA binding protein 1 [Source:HGNC Symbol;Acc:HGNC:7330]	-	581	275	7.92201	4.05006
ENSG00000143858	-2.18646	4.55188	0.0164929	0.365881	SYT2	1	202590596	202710417	-	7774	protein_coding	synaptotagmin 2 [Source:HGNC Symbol;Acc:HGNC:11510]	-	4	18	0.0216787	0.10537
ENSG00000164841	-2.18646	4.55188	0.0164929	0.365881	TMEM74	8	108606850	108787615	-	2877	protein_coding	transmembrane protein 74 [Source:HGNC Symbol;Acc:HGNC:26409]	-	4	18	0.0585785	0.284722
ENSG00000224713	-2.18646	4.55188	0.0164929	0.365881	AC025165.1	12	57612118	57619638	-	2600	antisense	novel transcript, antisense to ARHGEF25	-	4	18	0.0648193	0.315055
ENSG00000186976	-2.18646	4.55188	0.0164929	0.365881	EFCAB6	22	43528744	43812337	-	8557	protein_coding	EF-hand calcium binding domain 6 [Source:HGNC Symbol;Acc:HGNC:24204]	-	4	18	0.019695	0.0957279
ENSG00000187952	2.08457	4.24148	0.0164929	0.365881	HS6ST1P1	1	21428303	21429536	+	1234	processed_pseudogene	heparan sulfate 6-O-sulfotransferase 1 pseudogene 1 [Source:HGNC Symbol;Acc:HGNC:31835]	-	18	4	0.614575	0.147514
ENSG00000278733	-2.18646	4.55188	0.0164929	0.365881	AC022079.2	12	28185625	28186190	-	566	antisense	novel transcript, antisense to CCDC91	-	4	18	0.297757	1.44725
ENSG00000278434	-2.18646	4.55188	0.0164929	0.365881	AC023830.3	16	4532216	4533670	-	1455	sense_intronic	novel transcript, sense intronic to CDIP1	-	4	18	0.115828	0.562986
ENSG00000280043	-2.18646	4.55188	0.0164929	0.365881	AC118282.4	4	49229573	49231284	+	1712	TEC	tec	-	4	18	0.0984406	0.478472
ENSG00000154134	-1.02084	2.0291	0.0165497	0.366823	ROBO3	11	124865386	124881470	+	7026	protein_coding	roundabout guidance receptor 3 [Source:HGNC Symbol;Acc:HGNC:13433]	-	355	695	2.12882	4.50157
ENSG00000250486	-1.06714	2.09528	0.0165868	0.367326	FAM218A	4	164956948	164959122	+	2175	protein_coding	family with sequence similarity 218 member A [Source:HGNC Symbol;Acc:HGNC:26466]	-	135	273	2.61512	5.71204
ENSG00000227910	-1.72581	3.30765	0.0166546	0.367872	AC092634.4	7	63924787	63926306	-	876	transcribed_processed_pseudogene	TP53 target 3 (TP53TG3) pseudogene	-	9	29	0.432869	1.50654
ENSG00000231721	-1.72581	3.30765	0.0166546	0.367872	LINC-PINT	7	130938963	131110176	-	9030	processed_transcript	long intergenic non-protein coding RNA, p53 induced transcript [Source:HGNC Symbol;Acc:HGNC:26885]	-	9	29	0.0419926	0.14615
ENSG00000233560	-1.72581	3.30765	0.0166546	0.367872	KRT8P39	12	68705634	68707066	+	1433	processed_pseudogene	keratin 8 pseudogene 39 [Source:HGNC Symbol;Acc:HGNC:39873]	-	9	29	0.264615	0.920957
ENSG00000157240	1.01161	2.01616	0.0166868	0.368263	FZD1	7	91264364	91271326	+	6963	protein_coding	frizzled class receptor 1 [Source:HGNC Symbol;Acc:HGNC:4038]	-	949	454	5.74232	2.9672
ENSG00000283236	-1.34496	2.54023	0.0167062	0.368373	AC074141.1	19	51860242	51863236	-	2995	transcribed_unprocessed_pseudogene	novel zinc finger protein pseudogene	-	24	59	0.337623	0.896485
ENSG00000169136	1.01341	2.01868	0.0168165	0.370485	ATF5	19	49928702	49933935	+	2954	protein_coding	activating transcription factor 5 [Source:HGNC Symbol;Acc:HGNC:790]	TF_bZIP	833	398	11.881	6.13141
ENSG00000268686	-1.09166	2.1312	0.0168653	0.37112	AC010643.1	19	49368705	49388081	-	3263	antisense	uncharacterized LOC101928295 [Source:NCBI gene;Acc:101928295]	-	87	179	1.12336	2.49645
ENSG00000272316	-1.2631	2.40012	0.0168744	0.37112	AL021368.2	6	57908560	57913911	-	5352	lincRNA	novel transcript	-	28	65	0.220424	0.552694
ENSG00000236540	-1.25634	2.3889	0.0169166	0.371728	AC006547.1	22	20058030	20070569	-	2267	antisense	novel transcript, antisense to C22orf25	-	29	67	0.53897	1.34497
ENSG00000065621	-1.24404	2.36862	0.0169848	0.372907	GSTO2	10	104268873	104304945	+	9921	protein_coding	glutathione S-transferase omega 2 [Source:HGNC Symbol;Acc:HGNC:23064]	-	31	71	0.131651	0.32568
ENSG00000276966	-1.21063	2.31439	0.0171081	0.374525	HIST1H4E	6	26204552	26206038	+	1487	protein_coding	histone cluster 1 H4 family member e [Source:HGNC Symbol;Acc:HGNC:4790]	-	38	85	1.07669	2.60133
ENSG00000254815	-1.16758	2.24635	0.0171285	0.374525	AP006284.1	11	557595	560107	+	2418	antisense	novel transcript	-	47	102	0.818954	1.91969
ENSG00000117114	1.05352	2.07558	0.0171292	0.374525	ADGRL2	1	81306160	81992436	+	7754	protein_coding	adhesion G protein-coupled receptor L2 [Source:HGNC Symbol;Acc:HGNC:18582]	-	282	131	1.53229	0.768835
ENSG00000257800	-1.16999	2.2501	0.0171305	0.374525	FNBP1P1	2	74120680	74123218	+	1994	processed_pseudogene	formin binding protein 1 pseudogene 1 [Source:HGNC Symbol;Acc:HGNC:44528]	-	46	100	0.971965	2.28225
ENSG00000131016	-1.17512	2.25812	0.0171319	0.374525	AKAP12	6	151239999	151358557	+	8741	protein_coding	A-kinase anchoring protein 12 [Source:HGNC Symbol;Acc:HGNC:370]	-	44	96	0.212085	0.499802
ENSG00000101665	1.03599	2.05051	0.0171963	0.375611	SMAD7	18	48919853	48952052	-	5033	protein_coding	SMAD family member 7 [Source:HGNC Symbol;Acc:HGNC:6773]	MH1	387	182	3.23968	1.64563
ENSG00000213222	1.0452	2.06366	0.0173981	0.379694	AC093724.1	2	131723253	131724279	-	1027	processed_pseudogene	translocase of outer mitochondrial membrane 40 (TOMM40) pseudogene	-	336	157	13.7844	6.95692
ENSG00000179935	-1.58141	2.99262	0.0175391	0.381349	LINC00652	20	18786065	18794335	-	3859	lincRNA	long intergenic non-protein coding RNA 652 [Source:HGNC Symbol;Acc:HGNC:25003]	-	11	32	0.120098	0.377366
ENSG00000232065	-1.58141	2.99262	0.0175391	0.381349	LINC01063	3	196631498	196632587	-	348	antisense	long intergenic non-protein coding RNA 1063 [Source:HGNC Symbol;Acc:HGNC:49092]	-	11	32	1.33178	4.18464
ENSG00000283312	-1.58141	2.99262	0.0175391	0.381349	AC017104.4	2	231493708	231495299	-	1592	processed_pseudogene	GTF2I repeat domain containing 2(GTF2IRD2) pseudogene	-	11	32	0.291117	0.914734
ENSG00000116761	-1.06273	2.08888	0.0178393	0.381349	CTH	1	70411218	70439851	+	2414	protein_coding	cystathionine gamma-lyase [Source:HGNC Symbol;Acc:HGNC:2501]	-	124	250	2.16422	4.71292
ENSG00000136531	-1.54439	2.91681	0.0178604	0.381349	SCN2A	2	165194993	165392310	+	23695	protein_coding	sodium voltage-gated channel alpha subunit 2 [Source:HGNC Symbol;Acc:HGNC:10588]	-	12	34	0.0213374	0.0652995
ENSG00000233247	1.52346	2.87479	0.0178604	0.381349	AC002524.1	X	14244382	14244928	+	547	processed_pseudogene	ubiquitin-conjugating enzyme E2E 3 (UBC4\/5 homolog, yeast) (UBE2E3) pseudogene	-	36	12	2.77289	0.998347
ENSG00000137098	-1.54439	2.91681	0.0178604	0.381349	SPAG8	9	35808045	35812272	-	2722	protein_coding	sperm associated antigen 8 [Source:HGNC Symbol;Acc:HGNC:14105]	-	12	34	0.185742	0.568432
ENSG00000205871	-1.54439	2.91681	0.0178604	0.381349	RPS3AP47	15	43115702	43116493	-	792	processed_pseudogene	ribosomal protein S3a pseudogene 47 [Source:HGNC Symbol;Acc:HGNC:36744]	-	12	34	0.638372	1.95363
ENSG00000222041	-2.67692	6.3949	0.0178622	0.381349	CYTOR	2	87454781	87636740	+	17693	lincRNA	cytoskeleton regulator RNA [Source:HGNC Symbol;Acc:HGNC:28717]	-	2	13	0.00476262	0.0334372
ENSG00000279145	-2.67692	6.3949	0.0178622	0.381349	AC011912.1	15	55171378	55176739	-	5362	lincRNA	TEC	-	2	13	0.0157152	0.110333
ENSG00000267199	-2.67692	6.3949	0.0178622	0.381349	AP001029.2	18	12438890	12448205	+	5428	antisense	novel transcript, antisense SPIRE1	-	2	13	0.0155242	0.108991
ENSG00000250848	2.57665	5.96551	0.0178622	0.381349	AC021087.1	5	288833	290321	-	1203	processed_pseudogene	protein phosphatase 4, regulatory subunit 2 (PPP4R2) pseudogene	-	13	2	0.455298	0.0756575
ENSG00000234222	-2.67692	6.3949	0.0178622	0.381349	LIX1L-AS1	1	145926590	145959179	+	3248	antisense	LIX1L antisense RNA 1 [Source:HGNC Symbol;Acc:HGNC:41210]	-	2	13	0.0259437	0.182144
ENSG00000273007	-2.67692	6.3949	0.0178622	0.381349	AC021205.3	4	122881878	122884712	-	1709	antisense	novel transcript, antisense to FGF2	-	2	13	0.0493067	0.34617
ENSG00000197153	-2.67692	6.3949	0.0178622	0.381349	HIST1H3J	6	27890382	27893106	-	775	protein_coding	histone cluster 1 H3 family member j [Source:HGNC Symbol;Acc:HGNC:4774]	-	2	13	0.108729	0.76336
ENSG00000152766	-2.67692	6.3949	0.0178622	0.381349	ANKRD22	10	88822132	88851818	-	1733	protein_coding	ankyrin repeat domain 22 [Source:HGNC Symbol;Acc:HGNC:28321]	-	2	13	0.0486238	0.341376
ENSG00000258957	-2.67692	6.3949	0.0178622	0.381349	AL359317.2	14	69183020	69214092	-	2364	lincRNA	novel transcript	-	2	13	0.0356451	0.250255
ENSG00000269148	-2.67692	6.3949	0.0178622	0.381349	AC092301.1	19	45830164	45831108	+	764	antisense	novel transcript, antisense to SYMPK	-	2	13	0.110295	0.774351
ENSG00000272192	-2.67692	6.3949	0.0178622	0.381349	AC100812.1	8	65842752	65843331	+	580	lincRNA	novel transcript	-	2	13	0.145285	1.02001
ENSG00000271991	-2.67692	6.3949	0.0178622	0.381349	AC013400.1	2	19902025	19902569	+	545	bidirectional_promoter_lncRNA	novel transcript	-	2	13	0.154615	1.08551
ENSG00000246214	-2.67692	6.3949	0.0178622	0.381349	AC022113.1	5	16615926	16629969	+	1674	antisense	uncharacterized LOC101929524 [Source:NCBI gene;Acc:101929524]	-	2	13	0.0503376	0.353407
ENSG00000111215	2.57665	5.96551	0.0178622	0.381349	PRR4	12	10845849	10849475	-	1310	protein_coding	proline rich 4 [Source:HGNC Symbol;Acc:HGNC:18020]	-	13	2	0.418109	0.0694779
ENSG00000170935	-2.67692	6.3949	0.0178622	0.381349	NCBP2L	X	107774899	107795829	+	2079	protein_coding	nuclear cap binding protein subunit 2 like [Source:HGNC Symbol;Acc:HGNC:31795]	-	2	13	0.0405316	0.284562
ENSG00000285532	-2.67692	6.3949	0.0178622	0.381349	AC091614.2	1	90841587	90849472	+	754	lincRNA	novel transcript	-	2	13	0.111757	0.784621
ENSG00000279381	-2.67692	6.3949	0.0178622	0.381349	CR392039.1	21	9088188	9088391	+	204	processed_pseudogene	ankyrin repeat domain 20 family, member A2 (ANKRD20A2) pseudogene	-	2	13	0.413064	2.90002
ENSG00000135439	-2.02448	4.06846	0.0180032	0.382758	AGAP2	12	57723761	57742157	-	6728	protein_coding	ArfGAP with GTPase domain, ankyrin repeat and PH domain 2 [Source:HGNC Symbol;Acc:HGNC:16921]	-	5	20	0.0313114	0.135279
ENSG00000253661	-2.02448	4.06846	0.0180032	0.382758	ZFHX4-AS1	8	76491200	76683278	-	2251	antisense	ZFHX4 antisense RNA 1 [Source:HGNC Symbol;Acc:HGNC:44165]	-	5	20	0.0935863	0.404336
ENSG00000251988	-2.02448	4.06846	0.0180032	0.382758	RNU4ATAC18P	6	159720415	159720540	-	126	snRNA	RNA, U4atac small nuclear 18, pseudogene [Source:HGNC Symbol;Acc:HGNC:46904]	-	5	20	1.67193	7.22349
ENSG00000220161	-2.02448	4.06846	0.0180032	0.382758	LINC02076	17	18411159	18414380	+	1871	lincRNA	long intergenic non-protein coding RNA 2076 [Source:HGNC Symbol;Acc:HGNC:52924]	-	5	20	0.112594	0.486456
ENSG00000231119	-2.02448	4.06846	0.0180032	0.382758	AL031666.1	20	47352561	47354633	+	1809	antisense	uncharacterized LOC101927377 [Source:NCBI gene;Acc:101927377]	-	5	20	0.116453	0.503129
ENSG00000184465	-1.01488	2.02074	0.0180551	0.383544	WDR27	6	169457212	169702067	-	12610	protein_coding	WD repeat domain 27 [Source:HGNC Symbol;Acc:HGNC:21248]	-	259	505	0.865371	1.82249
ENSG00000164241	-1.03536	2.04963	0.0181164	0.383669	C5orf63	5	127042558	127073492	-	7190	protein_coding	chromosome 5 open reading frame 63 [Source:HGNC Symbol;Acc:HGNC:40051]	-	181	358	1.06064	2.26591
ENSG00000166106	1.48684	2.80275	0.0181211	0.383669	ADAMTS15	11	130448974	130476641	+	5673	protein_coding	ADAM metallopeptidase with thrombospondin type 1 motif 15 [Source:HGNC Symbol;Acc:HGNC:16305]	-	38	13	0.282221	0.104284
ENSG00000204248	-1.51225	2.85256	0.0181211	0.383669	COL11A2	6	33162681	33192499	-	6740	protein_coding	collagen type XI alpha 2 chain [Source:HGNC Symbol;Acc:HGNC:2187]	-	13	36	0.0812646	0.243069
ENSG00000231154	-1.51225	2.85256	0.0181211	0.383669	MORF4L2-AS1	X	103687284	103691772	+	2086	antisense	MORF4L2 antisense RNA 1 [Source:HGNC Symbol;Acc:HGNC:27991]	-	13	36	0.262571	0.785373
ENSG00000256663	1.11642	2.16809	0.0181699	0.384065	AC112777.1	12	20551590	20553012	+	1423	processed_pseudogene	ubiquitin-like with PHD and ring finger domains 1 (UHRF1) pseudogene	-	135	60	3.99712	1.91882
ENSG00000279088	-1.06505	2.09224	0.0182195	0.384795	AC022400.7	10	73742995	73744230	-	1236	TEC	TEC	-	102	206	3.47696	7.58467
ENSG00000182993	-1.13759	2.20013	0.0183185	0.38525	C12orf60	12	14803572	14906586	+	4612	protein_coding	chromosome 12 open reading frame 60 [Source:HGNC Symbol;Acc:HGNC:28726]	-	56	119	0.511584	1.17421
ENSG00000259405	-1.45918	2.74953	0.0185027	0.38525	ISCA1P4	15	40948736	40948869	-	134	processed_pseudogene	iron-sulfur cluster assembly 1 pseudogene 4 [Source:HGNC Symbol;Acc:HGNC:38025]	-	15	40	4.71633	13.5845
ENSG00000227885	-1.45918	2.74953	0.0185027	0.38525	AL590652.1	6	53740749	53794274	-	2374	processed_transcript	novel transcript	-	15	40	0.266212	0.766773
ENSG00000224699	-1.15135	2.22121	0.0185355	0.38525	LAMTOR5-AS1	1	110347116	110443817	+	10755	processed_transcript	LAMTOR5 antisense RNA 1 [Source:HGNC Symbol;Acc:HGNC:40823]	-	48	103	0.188039	0.435827
ENSG00000101871	1.40066	2.64022	0.0186397	0.38525	MID1	X	10445310	10833654	-	9295	protein_coding	midline 1 [Source:HGNC Symbol;Acc:HGNC:7095]	-	44	16	0.199444	0.0783354
ENSG00000205464	-1.07659	2.10904	0.0186755	0.38525	ATP6AP1L	5	82279462	82386977	+	7229	protein_coding	ATPase H+ transporting accessory protein 1 like [Source:HGNC Symbol;Acc:HGNC:28091]	-	83	169	0.483746	1.06389
ENSG00000231711	-1.03615	2.05075	0.0186991	0.38525	LINC00899	22	46039907	46044853	-	4947	processed_transcript	long intergenic non-protein coding RNA 899 [Source:HGNC Symbol;Acc:HGNC:48583]	-	144	285	1.22642	2.62175
ENSG00000260644	-1.41714	2.67056	0.018749	0.38525	HERC2P5	16	32741314	32776196	+	6078	transcribed_unprocessed_pseudogene	hect domain and RLD 2 pseudogene 5 [Source:HGNC Symbol;Acc:HGNC:4873]	-	17	44	0.117844	0.329443
ENSG00000166839	-1.0357	2.05011	0.0187797	0.38525	ANKDD1A	15	64911902	64958700	+	5042	protein_coding	ankyrin repeat and death domain containing 1A [Source:HGNC Symbol;Acc:HGNC:28002]	-	140	277	1.16988	2.50014
ENSG00000249948	-1.39923	2.63761	0.0188353	0.38525	GBA3	4	22692914	22819575	+	2932	polymorphic_pseudogene	glucosylceramidase beta 3 (gene/pseudogene) [Source:HGNC Symbol;Acc:HGNC:19069]	-	18	46	0.258658	0.713973
ENSG00000165521	1.03743	2.05257	0.018843	0.38525	EML5	14	88612431	88792752	-	11000	protein_coding	echinoderm microtubule associated protein like 5 [Source:HGNC Symbol;Acc:HGNC:18197]	-	281	132	1.0763	0.546096
ENSG00000278834	-1.383	2.6081	0.0189024	0.38525	AC073508.3	17	40648300	40649718	+	1419	antisense	novel transcript, antisense to SMARCE1	-	19	48	0.564143	1.53938
ENSG00000285184	-1.20932	2.31228	0.0189266	0.38525	AC244033.2	1	150045660	150067701	-	3269	bidirectional_promoter_lncRNA	novel transcript	-	34	76	0.43821	1.058
ENSG00000274104	-1.36823	2.58153	0.0189536	0.38525	AC020910.4	19	34733298	34733837	-	540	lincRNA	novel transcript	-	20	50	1.56047	4.2137
ENSG00000285851	-1.36823	2.58153	0.0189536	0.38525	AL359762.3	1	84498350	84556688	-	2686	processed_transcript	novel transcript	-	20	50	0.31372	0.847133
ENSG00000235823	-1.0998	2.14324	0.0189869	0.38525	OLMALINC	10	100373513	100454043	+	7763	lincRNA	oligodendrocyte maturation-associated long intergenic non-coding RNA [Source:HGNC Symbol;Acc:HGNC:28060]	-	72	149	0.39077	0.873463
ENSG00000141506	-1.35472	2.55747	0.0189915	0.38525	PIK3R5	17	8878911	8965712	-	7506	protein_coding	phosphoinositide-3-kinase regulatory subunit 5 [Source:HGNC Symbol;Acc:HGNC:30035]	-	21	52	0.117877	0.31527
ENSG00000139629	-1.23469	2.35331	0.0190249	0.38525	GALNT6	12	51351247	51392867	-	7347	protein_coding	polypeptide N-acetylgalactosaminyltransferase 6 [Source:HGNC Symbol;Acc:HGNC:4128]	-	29	66	0.166305	0.40881
ENSG00000181798	-1.23469	2.35331	0.0190249	0.38525	LINC00471	2	231508426	231514339	-	1282	lincRNA	long intergenic non-protein coding RNA 471 [Source:HGNC Symbol;Acc:HGNC:28668]	-	29	66	0.953077	2.34285
ENSG00000281183	-1.24078	2.36326	0.0190366	0.38525	NPTN-IT1	15	73567012	73569294	-	2283	sense_intronic	NPTN intronic transcript 1 [Source:HGNC Symbol;Acc:HGNC:45091]	-	28	64	0.516737	1.27574
ENSG00000170231	-1.32035	2.49727	0.0190446	0.38525	FABP6	5	160187367	160238735	+	1164	protein_coding	fatty acid binding protein 6 [Source:HGNC Symbol;Acc:HGNC:3561]	-	24	58	0.868713	2.26758
ENSG00000130208	-1.25427	2.38546	0.0190472	0.38525	APOC1	19	44914247	44919349	+	1231	protein_coding	apolipoprotein C1 [Source:HGNC Symbol;Acc:HGNC:607]	-	26	60	0.889883	2.2181
ENSG00000284968	-1.05815	2.08226	0.0190511	0.38525	AC093827.4	4	86924630	86936202	-	2801	antisense	Novel transcript, antisense to AFF1	-	100	201	1.5042	3.26566
ENSG00000182168	1.03434	2.04818	0.0191172	0.38525	UNC5C	4	95162504	95549206	-	10685	protein_coding	unc-5 netrin receptor C [Source:HGNC Symbol;Acc:HGNC:12569]	-	308	145	1.21449	0.617563
ENSG00000113211	-1.90413	3.74283	0.0191374	0.38525	PCDHB6	5	141150022	141153287	+	3266	protein_coding	protocadherin beta 6 [Source:HGNC Symbol;Acc:HGNC:8691]	-	6	22	0.0774021	0.306545
ENSG00000226833	-1.90413	3.74283	0.0191374	0.38525	AC092164.1	2	28708953	28736205	-	1438	antisense	novel transcript	-	6	22	0.175796	0.696228
ENSG00000215187	-1.90413	3.74283	0.0191374	0.38525	FAM166B	9	35561831	35563899	-	1372	protein_coding	family with sequence similarity 166 member B [Source:HGNC Symbol;Acc:HGNC:34242]	-	6	22	0.184253	0.72972
ENSG00000157554	-1.90413	3.74283	0.0191374	0.38525	ERG	21	38380027	38661780	-	7588	protein_coding	ERG, ETS transcription factor [Source:HGNC Symbol;Acc:HGNC:3446]	ETS	6	22	0.0333151	0.131942
ENSG00000257511	-1.90413	3.74283	0.0191374	0.38525	AC084824.1	12	32726383	32727387	-	1005	processed_pseudogene	nucleosome assembly protein 1-like 1 (NAP1L1) pseudogene	-	6	22	0.251538	0.996195
ENSG00000273340	-1.90413	3.74283	0.0191374	0.38525	MICE	6	29741731	29748969	-	1157	transcribed_unprocessed_pseudogene	MHC class I polypeptide-related sequence E (pseudogene) [Source:HGNC Symbol;Acc:HGNC:7094]	-	6	22	0.218492	0.865321
ENSG00000256282	-1.90413	3.74283	0.0191374	0.38525	AC112694.1	11	18595459	18599683	-	1366	transcribed_processed_pseudogene	mitochondrial carrier homolog 1 (C. elegans) (MTCH1)	-	6	22	0.185062	0.732925
ENSG00000229676	-1.11849	2.17119	0.0193676	0.38525	ZNF492	19	22634324	22667670	+	4245	protein_coding	zinc finger protein 492 [Source:HGNC Symbol;Acc:HGNC:23707]	zf-C2H2	62	130	0.615364	1.39365
ENSG00000214189	-1.11955	2.17279	0.0194102	0.38525	ZNF788P	19	12092263	12137235	+	5692	transcribed_unprocessed_pseudogene	zinc finger family member 788, pseudogene [Source:HGNC Symbol;Acc:HGNC:33112]	-	61	128	0.451526	1.02337
ENSG00000177943	-1.04005	2.05629	0.0196204	0.38525	MAMDC4	9	136850943	136860799	+	5469	protein_coding	MAM domain containing 4 [Source:HGNC Symbol;Acc:HGNC:24083]	-	130	258	1.00151	2.14684
ENSG00000130270	-1.06843	2.09715	0.0197169	0.38525	ATP8B3	19	1782075	1812276	-	7014	protein_coding	ATPase phospholipid transporting 8B3 [Source:HGNC Symbol;Acc:HGNC:13535]	-	81	164	0.486561	1.06406
ENSG00000240694	1.00071	2.00099	0.0199731	0.38525	PNMA2	8	26504686	26514092	-	5579	protein_coding	PNMA family member 2 [Source:HGNC Symbol;Acc:HGNC:9159]	-	527	254	3.9799	2.07188
ENSG00000177721	-1.81089	3.50858	0.0199879	0.38525	ANXA2R	5	43039081	43043170	-	2386	protein_coding	annexin A2 receptor [Source:HGNC Symbol;Acc:HGNC:33463]	-	7	24	0.123608	0.45775
ENSG00000227001	-1.81089	3.50858	0.0199879	0.38525	NBPF2P	1	21424625	21427967	-	661	unprocessed_pseudogene	NBPF member 2, pseudogene [Source:HGNC Symbol;Acc:HGNC:31987]	-	7	24	0.446184	1.65233
ENSG00000269984	-1.81089	3.50858	0.0199879	0.38525	AC078795.1	3	169777192	169780334	-	3143	antisense	novel transcript, antisense to MYNN	-	7	24	0.0938364	0.3475
ENSG00000163762	-1.81089	3.50858	0.0199879	0.38525	TM4SF18	3	149318498	149334414	-	4482	protein_coding	transmembrane 4 L six family member 18 [Source:HGNC Symbol;Acc:HGNC:25181]	-	7	24	0.0658027	0.243684
ENSG00000186399	-1.81089	3.50858	0.0199879	0.38525	GOLGA8R	15	30403740	30414162	-	4433	protein_coding	golgin A8 family member R [Source:HGNC Symbol;Acc:HGNC:44407]	-	7	24	0.0665301	0.246378
ENSG00000254840	-1.81089	3.50858	0.0199879	0.38525	AC024405.2	11	50307681	50361706	+	1562	transcribed_unprocessed_pseudogene	General transcription factor II-I (GTF2I) pseudogene	-	7	24	0.188814	0.699227
ENSG00000157017	-1.81089	3.50858	0.0199879	0.38525	GHRL	3	10285675	10292947	-	2064	protein_coding	ghrelin and obestatin prepropeptide [Source:HGNC Symbol;Acc:HGNC:18129]	-	7	24	0.142891	0.529163
ENSG00000246174	-1.09172	2.13128	0.0202374	0.38525	KCTD21-AS1	11	78139771	78175323	+	4095	antisense	KCTD21 antisense RNA 1 [Source:HGNC Symbol;Acc:HGNC:48674]	-	69	142	0.709926	1.57806
ENSG00000253210	-1.09172	2.13128	0.0202374	0.38525	AC040970.1	8	141126044	141129961	-	807	antisense	novel transcript	-	69	142	3.60241	8.0076
ENSG00000163888	1.1634	2.23985	0.0202392	0.38525	CAMK2N2	3	184259213	184261463	-	1362	protein_coding	calcium/calmodulin dependent protein kinase II inhibitor 2 [Source:HGNC Symbol;Acc:HGNC:24197]	-	100	43	3.09343	1.43674
ENSG00000260279	-1.14279	2.20808	0.0202392	0.38525	AC137932.1	16	89296128	89298317	+	1576	antisense	uncharacterized LOC105371414 [Source:NCBI gene;Acc:105371414]	-	45	96	1.20302	2.77206
ENSG00000227354	-1.1033	2.14846	0.0203467	0.38525	RBM26-AS1	13	79406309	79424328	+	3747	antisense	RBM26 antisense RNA 1 [Source:HGNC Symbol;Acc:HGNC:39805]	-	67	139	0.753371	1.68818
ENSG00000254872	-1.73638	3.33198	0.0206238	0.38525	AC139749.1	11	1049880	1055749	+	3443	lincRNA	uncharacterized LOC101927503 [Source:NCBI gene;Acc:101927503]	-	8	26	0.0978973	0.343656
ENSG00000226312	-1.73638	3.33198	0.0206238	0.38525	CFLAR-AS1	2	201140278	201157823	-	4334	antisense	CFLAR antisense RNA 1 [Source:HGNC Symbol;Acc:HGNC:14437]	-	8	26	0.0777712	0.273006
ENSG00000227473	1.19537	2.29004	0.0206343	0.38525	TSSK5P	8	144141214	144143664	-	907	unitary_pseudogene	testis specific serine kinase 5, pseudogene [Source:HGNC Symbol;Acc:HGNC:31931]	-	88	37	4.08783	1.85645
ENSG00000220785	-1.10736	2.15451	0.0206435	0.38525	MTMR9LP	1	32231658	32241620	-	2961	transcribed_unprocessed_pseudogene	myotubularin related protein 9-like, pseudogene [Source:HGNC Symbol;Acc:HGNC:27920]	-	62	129	0.882208	1.98262
ENSG00000204815	-1.17954	2.26505	0.0207772	0.38525	TTC25	17	41930635	41965651	+	2500	protein_coding	tetratricopeptide repeat domain 25 [Source:HGNC Symbol;Acc:HGNC:25280]	-	37	81	0.623562	1.47446
ENSG00000137965	-1.01769	2.02468	0.0208284	0.38525	IFI44	1	78649796	78664078	+	2038	protein_coding	interferon induced protein 44 [Source:HGNC Symbol;Acc:HGNC:16938]	-	152	297	3.14237	6.63193
ENSG00000172167	-1.01746	2.02436	0.0208635	0.38525	MTBP	8	120445400	120542133	+	8326	protein_coding	MDM2 binding protein [Source:HGNC Symbol;Acc:HGNC:7417]	-	151	295	0.764114	1.6124
ENSG00000174827	2.22435	4.673	0.0209521	0.38525	PDZK1	1	145670852	145708148	-	2480	protein_coding	PDZ domain containing 1 [Source:HGNC Symbol;Acc:HGNC:8821]	-	15	3	0.254834	0.05505
ENSG00000168453	-2.32567	5.01297	0.0209521	0.38525	HR	8	22114415	22133384	-	8784	protein_coding	HR, lysine demethylase and nuclear receptor corepressor [Source:HGNC Symbol;Acc:HGNC:5172]	-	3	15	0.0143895	0.0777117
ENSG00000160117	2.22435	4.673	0.0209521	0.38525	ANKLE1	19	17281645	17287646	+	3569	protein_coding	ankyrin repeat and LEM domain containing 1 [Source:HGNC Symbol;Acc:HGNC:26812]	-	15	3	0.177077	0.0382527
ENSG00000152154	-2.32567	5.01297	0.0209521	0.38525	TMEM178A	2	39664982	39717963	+	2470	protein_coding	transmembrane protein 178A [Source:HGNC Symbol;Acc:HGNC:28517]	-	3	15	0.0511731	0.276364
ENSG00000155465	-2.32567	5.01297	0.0209521	0.38525	SLC7A7	14	22773222	22829820	-	5131	protein_coding	solute carrier family 7 member 7 [Source:HGNC Symbol;Acc:HGNC:11065]	-	3	15	0.0246341	0.133038
ENSG00000284052	2.22435	4.673	0.0209521	0.38525	AC006460.2	2	190607660	190649840	-	7811	bidirectional_promoter_lncRNA	novel transcript	-	15	3	0.08091	0.0174784
ENSG00000154537	-2.32567	5.01297	0.0209521	0.38525	FAM27C	9	61854162	61855331	+	616	lincRNA	family with sequence similarity 27 member C [Source:HGNC Symbol;Acc:HGNC:23668]	-	3	15	0.205191	1.10815
ENSG00000276272	2.22435	4.673	0.0209521	0.38525	AC024884.2	12	56411944	56413190	-	1247	lincRNA	novel transcript	-	15	3	0.506807	0.109482
ENSG00000199325	-2.32567	5.01297	0.0209521	0.38525	RNU4-39P	11	66614964	66615090	-	127	snRNA	RNA, U4 small nuclear 39, pseudogene [Source:HGNC Symbol;Acc:HGNC:46975]	-	3	15	0.995257	5.37496
ENSG00000283886	-2.32567	5.01297	0.0209521	0.38525	BX664615.2	9	39816600	39874206	-	1739	processed_transcript	novel transcript	-	3	15	0.0726841	0.392536
ENSG00000223522	-2.32567	5.01297	0.0209521	0.38525	AC093690.1	2	28307691	28310459	-	2110	antisense	uncharacterized LOC100505716 [Source:NCBI gene;Acc:100505716]	-	3	15	0.0599041	0.323517
ENSG00000080823	-1.03801	2.05339	0.0210543	0.38525	MOK	14	102224500	102305200	-	10996	protein_coding	MOK protein kinase [Source:HGNC Symbol;Acc:HGNC:9833]	-	111	220	0.42531	0.910491
ENSG00000158828	1.02721	2.03808	0.0210962	0.38525	PINK1	1	20633455	20651511	+	4836	protein_coding	PTEN induced putative kinase 1 [Source:HGNC Symbol;Acc:HGNC:14581]	-	260	123	2.26519	1.15746
ENSG00000176920	-1.6754	3.19407	0.0210963	0.38525	FUT2	19	48695971	48705950	+	3380	protein_coding	fucosyltransferase 2 [Source:HGNC Symbol;Acc:HGNC:4013]	-	9	28	0.112187	0.376989
ENSG00000261485	-1.6754	3.19407	0.0210963	0.38525	PAN3-AS1	13	28136843	28138193	-	1351	antisense	PAN3 antisense RNA 1 [Source:HGNC Symbol;Acc:HGNC:39932]	-	9	28	0.280676	0.943171
ENSG00000226386	-1.6754	3.19407	0.0210963	0.38525	PARD3-AS1	10	34815767	34816386	+	302	antisense	PARD3 antisense RNA 1 [Source:HGNC Symbol;Acc:HGNC:44964]	-	9	28	1.25561	4.21928
ENSG00000233396	-1.03389	2.04754	0.0211393	0.38525	LINC01719	1	146052566	146061948	+	2458	lincRNA	long intergenic non-protein coding RNA 1719 [Source:HGNC Symbol;Acc:HGNC:52506]	-	126	249	2.15977	4.61005
ENSG00000119878	-1.01472	2.02052	0.0212828	0.38525	CRIPT	2	46616416	46625742	+	2561	protein_coding	CXXC repeat containing interactor of PDZ3 domain [Source:HGNC Symbol;Acc:HGNC:14312]	-	140	273	2.30322	4.85111
ENSG00000146856	-1.08112	2.11567	0.0213787	0.38525	AGBL3	7	134986508	135147963	+	7307	protein_coding	ATP/GTP binding protein like 3 [Source:HGNC Symbol;Acc:HGNC:27981]	-	70	143	0.403624	0.890604
ENSG00000162755	-1.0139	2.01936	0.0214092	0.38525	KLHDC9	1	161098361	161100346	+	1720	protein_coding	kelch domain containing 9 [Source:HGNC Symbol;Acc:HGNC:28489]	-	137	267	3.35591	7.06432
ENSG00000261572	1.52156	2.87101	0.0214439	0.38525	AC097639.1	3	32236688	32238578	-	1891	sense_intronic	novel transcript, intronic to CMTM8	-	30	10	0.668417	0.240656
ENSG00000131831	1.52156	2.87101	0.0214439	0.38525	RAI2	X	17800049	17861337	-	2622	protein_coding	retinoic acid induced 2 [Source:HGNC Symbol;Acc:HGNC:9835]	-	30	10	0.482066	0.173562
ENSG00000277639	-1.62452	3.0834	0.0214439	0.38525	AC007906.2	16	53035690	53052873	-	1983	protein_coding	p53-regulated lncRNA 1 [Source:NCBI gene;Acc:105371267]	-	10	30	0.212469	0.688472
ENSG00000278599	-1.62452	3.0834	0.0214439	0.38525	TBC1D3E	17	38127951	38138862	+	2076	protein_coding	TBC1 domain family member 3E [Source:HGNC Symbol;Acc:HGNC:27071]	-	10	30	0.202951	0.65763
ENSG00000240036	-1.2181	2.32641	0.021474	0.38525	AC104563.1	11	27581680	27582055	+	376	processed_pseudogene	novel pseudogene	-	28	63	3.13753	7.62501
ENSG00000230953	-1.12032	2.17395	0.0215311	0.38525	AC099677.1	1	52920422	52920596	+	175	processed_pseudogene	translational machinery associated 7 homolog (S. cerevisiae) (TMA7) pseudogene	-	50	105	12.0379	27.3048
ENSG00000050438	3.12122	8.70124	0.0215665	0.38525	SLC4A8	12	51391317	51515763	+	17980	protein_coding	solute carrier family 4 member 8 [Source:HGNC Symbol;Acc:HGNC:11034]	-	10	1	0.023433	0.00253103
ENSG00000121966	3.12122	8.70124	0.0215665	0.38525	CXCR4	2	136114349	136118165	-	2224	protein_coding	C-X-C motif chemokine receptor 4 [Source:HGNC Symbol;Acc:HGNC:2561]	-	10	1	0.189445	0.0204622
ENSG00000168497	-3.21864	9.30906	0.0215665	0.38525	CAVIN2	2	191834302	191847255	-	3229	protein_coding	caveolae associated protein 2 [Source:HGNC Symbol;Acc:HGNC:10690]	-	1	10	0.0130482	0.140935
ENSG00000244274	3.12122	8.70124	0.0215665	0.38525	DBNDD2	20	45406057	45410610	+	2764	protein_coding	dysbindin domain containing 2 [Source:HGNC Symbol;Acc:HGNC:15881]	-	10	1	0.152433	0.0164645
ENSG00000137841	-3.21864	9.30906	0.0215665	0.38525	PLCB2	15	40278176	40307935	-	7350	protein_coding	phospholipase C beta 2 [Source:HGNC Symbol;Acc:HGNC:9055]	-	1	10	0.00573232	0.0619156
ENSG00000270084	-3.21864	9.30906	0.0215665	0.38525	GAS5-AS1	1	173863248	173863941	+	694	antisense	GAS5 antisense RNA 1 [Source:HGNC Symbol;Acc:HGNC:44119]	-	1	10	0.0607097	0.655735
ENSG00000281903	3.12122	8.70124	0.0215665	0.38525	LINC02246	21	14819699	14918552	-	3635	lincRNA	long intergenic non-protein coding RNA 2246 [Source:HGNC Symbol;Acc:HGNC:53135]	-	10	1	0.115908	0.0125194
ENSG00000204622	-3.21864	9.30906	0.0215665	0.38525	HLA-J	6	30005971	30009956	+	1946	transcribed_unprocessed_pseudogene	major histocompatibility complex, class I, J (pseudogene) [Source:HGNC Symbol;Acc:HGNC:4967]	-	1	10	0.0216509	0.233854
ENSG00000251209	-3.21864	9.30906	0.0215665	0.38525	LINC00923	15	97572185	97874550	-	7073	lincRNA	long intergenic non-protein coding RNA 923 [Source:HGNC Symbol;Acc:HGNC:28088]	-	1	10	0.00595682	0.0643404
ENSG00000198153	-3.21864	9.30906	0.0215665	0.38525	ZNF849P	19	22685167	22686732	+	1566	unprocessed_pseudogene	zinc finger protein 849, pseudogene [Source:HGNC Symbol;Acc:HGNC:34389]	-	1	10	0.0269046	0.2906
ENSG00000100253	-3.21864	9.30906	0.0215665	0.38525	MIOX	22	50486784	50490648	+	1796	protein_coding	myo-inositol oxygenase [Source:HGNC Symbol;Acc:HGNC:14522]	-	1	10	0.0234591	0.253385
ENSG00000183154	3.12122	8.70124	0.0215665	0.38525	AC138356.1	8	37734761	37737426	-	2086	antisense	uncharacterized LOC102723701 [Source:NCBI gene;Acc:102723701]	-	10	1	0.201978	0.0218159
ENSG00000276231	-3.21864	9.30906	0.0215665	0.38525	PIK3R6	17	8802723	8867677	-	3564	protein_coding	phosphoinositide-3-kinase regulatory subunit 6 [Source:HGNC Symbol;Acc:HGNC:27101]	-	1	10	0.0118217	0.127688
ENSG00000269910	-3.21864	9.30906	0.0215665	0.38525	AL049840.2	14	103694516	103695050	-	535	antisense	novel transcript, antisense to KLC1	-	1	10	0.0787524	0.850617
ENSG00000257999	-3.21864	9.30906	0.0215665	0.38525	AC016257.1	12	105102472	105107179	-	641	antisense	uncharacterized LOC414300 [Source:NCBI gene;Acc:414300]	-	1	10	0.0657294	0.709953
ENSG00000234722	-3.21864	9.30906	0.0215665	0.38525	LINC01287	7	153355365	153413981	-	4987	lincRNA	long intergenic non-protein coding RNA 1287 [Source:HGNC Symbol;Acc:HGNC:50351]	-	1	10	0.00844848	0.0912533
ENSG00000267185	-3.21864	9.30906	0.0215665	0.38525	PTP4A2P1	17	42533532	42534009	+	478	processed_pseudogene	protein tyrosine phosphatase type IVA, member 2 pseudogene 1 [Source:HGNC Symbol;Acc:HGNC:9637]	-	1	10	0.0881434	0.95205
ENSG00000260288	-3.21864	9.30906	0.0215665	0.38525	AC019294.2	15	75737820	75763321	+	2489	processed_transcript	uncharacterized LOC101929408 [Source:NCBI gene;Acc:101929408]	-	1	10	0.0169275	0.182836
ENSG00000283635	-3.21864	9.30906	0.0215665	0.38525	AC012485.3	2	238289127	238300185	+	2424	antisense	novel transcript, antisense to PER2	-	1	10	0.0173814	0.187739
ENSG00000257191	-3.21864	9.30906	0.0215665	0.38525	AC090709.1	12	78960258	79045644	-	716	antisense	novel transcript, antisense to SYT1	-	1	10	0.0588444	0.635587
ENSG00000280286	-3.21864	9.30906	0.0215665	0.38525	FRG1KP	9	65646982	65652679	-	341	unprocessed_pseudogene	FSHD region gene 1 family member K, pseudogene [Source:HGNC Symbol;Acc:HGNC:51769]	-	1	10	0.123556	1.33455
ENSG00000259407	-3.21864	9.30906	0.0215665	0.38525	AC021739.2	15	85744109	85750281	-	964	antisense	novel transcript, antisense to AKAP13	-	1	10	0.043706	0.472075
ENSG00000227070	-3.21864	9.30906	0.0215665	0.38525	AC104170.1	1	51518309	51561629	+	476	antisense	novel transcript	-	1	10	0.0885138	0.95605
ENSG00000279057	-3.21864	9.30906	0.0215665	0.38525	AC141586.4	16	2620222	2621794	-	1573	TEC	tec	-	1	10	0.0267848	0.289307
ENSG00000225978	3.12122	8.70124	0.0215665	0.38525	HAR1A	20	63102205	63104386	+	1882	lincRNA	highly accelerated region 1A [Source:HGNC Symbol;Acc:HGNC:33117]	-	10	1	0.223871	0.0241807
ENSG00000234115	3.12122	8.70124	0.0215665	0.38525	AL138878.2	6	7516600	7517840	-	1241	processed_pseudogene	isocitrate dehydrogenase 1 (NADP+), soluble (IDH1) pseudogene	-	10	1	0.339505	0.0366704
ENSG00000227253	-3.21864	9.30906	0.0215665	0.38525	AL158834.2	10	32266289	32269474	+	1109	antisense	novel transcript	-	1	10	0.0379915	0.410352
ENSG00000221269	3.12122	8.70124	0.0215665	0.38525	MIR1302-8	9	97363554	97363681	-	128	miRNA	microRNA 1302-8 [Source:HGNC Symbol;Acc:HGNC:35300]	-	10	1	3.29161	0.355531
ENSG00000272763	-3.21864	9.30906	0.0215665	0.38525	AC103702.2	17	48635923	48647023	-	1596	lincRNA	novel transcript	-	1	10	0.0263988	0.285138
ENSG00000265033	-3.21864	9.30906	0.0215665	0.38525	RN7SL262P	X	49152651	49152944	+	294	misc_RNA	RNA, 7SL, cytoplasmic 262, pseudogene [Source:HGNC Symbol;Acc:HGNC:46278]	-	1	10	0.143308	1.54789
ENSG00000258414	-3.21864	9.30906	0.0215665	0.38525	AL121790.1	14	37564047	37579125	+	738	lincRNA	novel transcript	-	1	10	0.0570902	0.61664
ENSG00000189348	3.12122	8.70124	0.0215665	0.38525	FAM90A27P	19	53281559	53284944	+	1381	transcribed_unprocessed_pseudogene	family with sequence similarity 90 member A27, pseudogene [Source:HGNC Symbol;Acc:HGNC:43617]	-	10	1	0.305087	0.0329529
ENSG00000182330	3.12122	8.70124	0.0215665	0.38525	PRAMEF8	1	13281035	13285174	-	1937	protein_coding	PRAME family member 8 [Source:HGNC Symbol;Acc:HGNC:24074]	-	10	1	0.217515	0.0234941
ENSG00000138798	-1.23007	2.34578	0.0216315	0.38525	EGF	4	109912884	110012266	+	6127	protein_coding	epidermal growth factor [Source:HGNC Symbol;Acc:HGNC:3229]	-	26	59	0.17879	0.43822
ENSG00000263597	-1.23007	2.34578	0.0216315	0.38525	MIR3936	5	132365490	132365599	-	110	miRNA	microRNA 3936 [Source:HGNC Symbol;Acc:HGNC:38947]	-	26	59	9.9586	24.4088
ENSG00000185203	-1.53578	2.89946	0.0216953	0.38525	WASIR1	X	156014623	156016837	-	1054	antisense	WASH and IL9R antisense RNA 1 [Source:HGNC Symbol;Acc:HGNC:38513]	-	11	31	0.439714	1.33847
ENSG00000103056	-1.05077	2.07163	0.0217021	0.38525	SMPD3	16	68358325	68448688	-	7166	protein_coding	sphingomyelin phosphodiesterase 3 [Source:HGNC Symbol;Acc:HGNC:14240]	-	83	166	0.487999	1.05419
ENSG00000205238	-1.29531	2.4543	0.0217082	0.38525	SPDYE2	7	102551232	102562308	+	2072	protein_coding	speedy/RINGO cell cycle regulator family member E2 [Source:HGNC Symbol;Acc:HGNC:33841]	-	24	57	0.488022	1.25191
ENSG00000279519	1.25295	2.38329	0.0217825	0.38525	AC007382.1	2	36839922	36842539	-	2618	TEC	TEC	-	57	23	0.917325	0.399803
ENSG00000258884	-1.31542	2.48874	0.0218534	0.38525	LINC02321	14	90822365	90828128	-	384	lincRNA	long intergenic non-protein coding RNA 2321 [Source:HGNC Symbol;Acc:HGNC:53240]	-	22	53	2.41384	6.28105
ENSG00000143127	-1.50148	2.83133	0.0218722	0.38525	ITGA10	1	145891208	145910189	-	6320	protein_coding	integrin subunit alpha 10 [Source:HGNC Symbol;Acc:HGNC:6135]	-	12	33	0.0799985	0.237621
ENSG00000159761	-1.50148	2.83133	0.0218722	0.38525	C16orf86	16	67666816	67668758	+	1789	protein_coding	chromosome 16 open reading frame 86 [Source:HGNC Symbol;Acc:HGNC:33755]	-	12	33	0.282611	0.839443
ENSG00000105219	-1.50148	2.83133	0.0218722	0.38525	CNTD2	19	40222208	40226697	-	2046	protein_coding	cyclin N-terminal domain containing 2 [Source:HGNC Symbol;Acc:HGNC:25805]	-	12	33	0.247112	0.734
ENSG00000278876	-1.50148	2.83133	0.0218722	0.38525	AC145207.9	17	81862778	81863102	+	325	TEC	TEC	-	12	33	1.55566	4.62081
ENSG00000146677	-1.04339	2.06107	0.0218729	0.38525	AC004453.1	7	44467897	44468304	+	408	processed_pseudogene	ribosomal protein L32 (RPL32) pseudogene	-	96	191	9.91354	21.304
ENSG00000169629	-1.32677	2.50841	0.0219197	0.38525	RGPD8	2	112370092	112434488	-	6886	protein_coding	RANBP2-like and GRIP domain containing 8 [Source:HGNC Symbol;Acc:HGNC:9849]	-	21	51	0.12849	0.337047
ENSG00000228933	-1.33915	2.53003	0.0219798	0.38525	AC107419.1	X	27174920	27398997	-	2820	lincRNA	novel transcript	-	20	49	0.298812	0.790742
ENSG00000165949	-1.47175	2.77359	0.0219911	0.38525	IFI27	14	94104836	94116698	+	4147	protein_coding	interferon alpha inducible protein 27 [Source:HGNC Symbol;Acc:HGNC:5397]	-	13	35	0.132077	0.38408
ENSG00000242021	-1.47175	2.77359	0.0219911	0.38525	AC112493.1	X	27042907	27176298	-	887	lincRNA	novel transcript	-	13	35	0.617501	1.79569
ENSG00000267710	-1.47175	2.77359	0.0219911	0.38525	EDDM13	19	56272769	56310450	+	2326	protein_coding	epididymal protein 13 [Source:HGNC Symbol;Acc:HGNC:53168]	-	13	35	0.235479	0.684772
ENSG00000172264	-1.35271	2.55391	0.022032	0.38525	MACROD2	20	13995369	16053197	+	11428	protein_coding	MACRO domain containing 2 [Source:HGNC Symbol;Acc:HGNC:16126]	-	19	47	0.0700489	0.187161
ENSG00000217241	-1.35271	2.55391	0.022032	0.38525	CBX3P9	6	116453014	116453565	-	552	processed_pseudogene	chromobox 3 pseudogene 9 [Source:HGNC Symbol;Acc:HGNC:42881]	-	19	47	1.45021	3.87478
ENSG00000144792	-1.44573	2.72402	0.0220647	0.38525	ZNF660	3	44578223	44599694	+	6513	protein_coding	zinc finger protein 660 [Source:HGNC Symbol;Acc:HGNC:26720]	zf-C2H2	14	37	0.0905659	0.258528
ENSG00000259343	-1.44573	2.72402	0.0220647	0.38525	TMC3-AS1	15	81324377	81518200	+	7767	antisense	TMC3 antisense RNA 1 [Source:HGNC Symbol;Acc:HGNC:51424]	-	14	37	0.0759438	0.216788
ENSG00000275854	-1.44573	2.72402	0.0220647	0.38525	AC084824.4	12	32736930	32737660	-	731	sense_intronic	novel transcript, sense intronic to YARS2	-	14	37	0.806916	2.30341
ENSG00000149289	-1.36761	2.58042	0.0220737	0.38525	ZC3H12C	11	110093361	110171841	+	9719	protein_coding	zinc finger CCCH-type containing 12C [Source:HGNC Symbol;Acc:HGNC:29362]	-	18	45	0.0780313	0.210707
ENSG00000139278	-1.36761	2.58042	0.0220737	0.38525	GLIPR1	12	75480680	75503853	+	6273	protein_coding	GLI pathogenesis related 1 [Source:HGNC Symbol;Acc:HGNC:17001]	-	18	45	0.120897	0.326456
ENSG00000256433	-1.36761	2.58042	0.0220737	0.38525	AC005840.2	12	6393905	6396148	+	1803	lincRNA	novel transcript	-	18	45	0.420625	1.13581
ENSG00000279716	-1.38407	2.61003	0.0221021	0.38525	AC006128.1	19	15398696	15400356	+	1661	TEC	TEC	-	17	43	0.431218	1.17811
ENSG00000253921	-1.38407	2.61003	0.0221021	0.38525	AC091982.1	5	151753992	151767247	+	570	antisense	novel transcript	-	17	43	1.25659	3.43306
ENSG00000271816	-1.42277	2.681	0.022103	0.38525	BMS1P4	10	73699151	73730487	-	1913	processed_transcript	BMS1, ribosome biogenesis factor pseudogene 4 [Source:NCBI gene;Acc:729096]	-	15	39	0.330365	0.927764
ENSG00000279044	1.39146	2.62344	0.022103	0.38525	AC007787.2	19	13081966	13082564	+	599	TEC	TEC	-	41	15	2.88386	1.1396
ENSG00000160801	-1.40235	2.64331	0.0221135	0.38525	PTH1R	3	46877746	46903799	+	2758	protein_coding	parathyroid hormone 1 receptor [Source:HGNC Symbol;Acc:HGNC:9608]	-	16	41	0.244424	0.676515
ENSG00000100218	-1.40235	2.64331	0.0221135	0.38525	RSPH14	22	23059415	23145021	-	2436	protein_coding	radial spoke head 14 homolog [Source:HGNC Symbol;Acc:HGNC:13437]	-	16	41	0.276733	0.765939
ENSG00000232860	-1.40235	2.64331	0.0221135	0.38525	SMG7-AS1	1	183460874	183472265	-	3383	processed_transcript	SMG7 antisense RNA 1 [Source:HGNC Symbol;Acc:HGNC:24518]	-	16	41	0.199267	0.551531
ENSG00000235897	-1.40235	2.64331	0.0221135	0.38525	TM4SF19-AS1	3	196318330	196325570	+	2136	antisense	TM4SF19 antisense RNA 1 [Source:HGNC Symbol;Acc:HGNC:41085]	-	16	41	0.3156	0.873515
ENSG00000269737	-1.02532	2.03541	0.0226093	0.38525	AL691432.1	1	1671990	1674397	+	1819	transcribed_processed_pseudogene	ribosomal protein S7 (RPS7) pseudogene	-	113	222	2.61736	5.55403
ENSG00000109072	5.80762	56.0104	0.0226768	0.38525	VTN	17	28367276	28373091	-	2427	protein_coding	vitronectin [Source:HGNC Symbol;Acc:HGNC:12724]	-	7	0	0.12152	0
ENSG00000116741	-5.85862	58.0259	0.0226768	0.38525	RGS2	1	192809039	192812283	+	2096	protein_coding	regulator of G protein signaling 2 [Source:HGNC Symbol;Acc:HGNC:9998]	-	0	7	0	0.151983
ENSG00000164904	5.80762	56.0104	0.0226768	0.38525	ALDH7A1	5	126531200	126595418	-	17970	protein_coding	aldehyde dehydrogenase 7 family member A1 [Source:HGNC Symbol;Acc:HGNC:877]	-	7	0	0.0164122	0
ENSG00000169856	-5.85862	58.0259	0.0226768	0.38525	ONECUT1	15	52756989	52791078	-	3850	protein_coding	one cut homeobox 1 [Source:HGNC Symbol;Acc:HGNC:8138]	CUT	0	7	0	0.0827418
ENSG00000005059	-5.85862	58.0259	0.0226768	0.38525	MCUB	4	109560205	109688726	+	3566	protein_coding	mitochondrial calcium uniporter dominant negative beta subunit [Source:HGNC Symbol;Acc:HGNC:26076]	-	0	7	0	0.0893315
ENSG00000133805	5.80762	56.0104	0.0226768	0.38525	AMPD3	11	10308313	10507579	+	6793	protein_coding	adenosine monophosphate deaminase 3 [Source:HGNC Symbol;Acc:HGNC:470]	-	7	0	0.0434164	0
ENSG00000056558	-5.85862	58.0259	0.0226768	0.38525	TRAF1	9	120902393	120929173	-	6449	protein_coding	TNF receptor associated factor 1 [Source:HGNC Symbol;Acc:HGNC:12031]	-	0	7	0	0.0493962
ENSG00000154027	5.80762	56.0104	0.0226768	0.38525	AK5	1	77282051	77559969	+	6919	protein_coding	adenylate kinase 5 [Source:HGNC Symbol;Acc:HGNC:365]	-	7	0	0.0426258	0
ENSG00000129009	5.80762	56.0104	0.0226768	0.38525	ISLR	15	74173671	74176872	+	2671	protein_coding	immunoglobulin superfamily containing leucine rich repeat [Source:HGNC Symbol;Acc:HGNC:6133]	-	7	0	0.110419	0
ENSG00000158458	5.80762	56.0104	0.0226768	0.38525	NRG2	5	139846779	140043299	-	4520	protein_coding	neuregulin 2 [Source:HGNC Symbol;Acc:HGNC:7998]	-	7	0	0.0652495	0
ENSG00000138411	-5.85862	58.0259	0.0226768	0.38525	HECW2	2	196189099	196593692	-	23683	protein_coding	HECT, C2 and WW domain containing E3 ubiquitin protein ligase 2 [Source:HGNC Symbol;Acc:HGNC:29853]	-	0	7	0	0.0134508
ENSG00000130540	-5.85862	58.0259	0.0226768	0.38525	SULT4A1	22	43824509	43862503	-	2849	protein_coding	sulfotransferase family 4A member 1 [Source:HGNC Symbol;Acc:HGNC:14903]	-	0	7	0	0.111813
ENSG00000232821	-5.85862	58.0259	0.0226768	0.38525	AC003986.2	7	19112474	19114271	+	1711	antisense	novel transcript	-	0	7	0	0.186181
ENSG00000261087	-5.85862	58.0259	0.0226768	0.38525	AP003469.4	8	101166805	101169629	-	2825	lincRNA	novel transcript	-	0	7	0	0.112763
ENSG00000266017	5.80762	56.0104	0.0226768	0.38525	MIR4477B	9	63819574	63819654	+	81	miRNA	microRNA 4477b [Source:HGNC Symbol;Acc:HGNC:41898]	-	7	0	3.64109	0
ENSG00000166828	-5.85862	58.0259	0.0226768	0.38525	SCNN1G	16	23182715	23216883	+	3507	protein_coding	sodium channel epithelial 1 gamma subunit [Source:HGNC Symbol;Acc:HGNC:10602]	-	0	7	0	0.0908343
ENSG00000203721	-5.85862	58.0259	0.0226768	0.38525	LINC00862	1	200253419	200400705	-	3174	lincRNA	long intergenic non-protein coding RNA 862 [Source:HGNC Symbol;Acc:HGNC:21901]	-	0	7	0	0.100364
ENSG00000139985	-5.85862	58.0259	0.0226768	0.38525	ADAM21	14	70452157	70459899	+	2658	protein_coding	ADAM metallopeptidase domain 21 [Source:HGNC Symbol;Acc:HGNC:200]	-	0	7	0	0.119848
ENSG00000244588	-5.85862	58.0259	0.0226768	0.38525	RAD21L1	20	1226056	1296421	+	2730	protein_coding	RAD21 cohesin complex component like 1 [Source:HGNC Symbol;Acc:HGNC:16271]	-	0	7	0	0.116687
ENSG00000249464	-5.85862	58.0259	0.0226768	0.38525	LINC01091	4	123650267	123930406	+	7779	lincRNA	long intergenic non-protein coding RNA 1091 [Source:HGNC Symbol;Acc:HGNC:27721]	-	0	7	0	0.0409508
ENSG00000163803	-5.85862	58.0259	0.0226768	0.38525	PLB1	2	28457145	28643788	+	8238	protein_coding	phospholipase B1 [Source:HGNC Symbol;Acc:HGNC:30041]	-	0	7	0	0.0386691
ENSG00000240764	-5.85862	58.0259	0.0226768	0.38525	PCDHGC5	5	141489121	141512979	+	4990	protein_coding	protocadherin gamma subfamily C, 5 [Source:HGNC Symbol;Acc:HGNC:8718]	-	0	7	0	0.0638389
ENSG00000257681	-5.85862	58.0259	0.0226768	0.38525	AC025265.1	12	103746315	103768858	-	1063	antisense	novel transcript, antisense to STAB2	-	0	7	0	0.299676
ENSG00000196353	-5.85862	58.0259	0.0226768	0.38525	CPNE4	3	131533555	132285410	-	6427	protein_coding	copine 4 [Source:HGNC Symbol;Acc:HGNC:2317]	-	0	7	0	0.0495653
ENSG00000132000	-5.85862	58.0259	0.0226768	0.38525	PODNL1	19	13931187	13953392	-	4168	protein_coding	podocan like 1 [Source:HGNC Symbol;Acc:HGNC:26275]	-	0	7	0	0.076429
ENSG00000131097	5.80762	56.0104	0.0226768	0.38525	HIGD1B	17	44846353	44850480	+	861	protein_coding	HIG1 hypoxia inducible domain family member 1B [Source:HGNC Symbol;Acc:HGNC:24318]	-	7	0	0.342541	0
ENSG00000235151	-5.85862	58.0259	0.0226768	0.38525	AC131097.4	2	241844380	241845036	+	571	lincRNA	novel transcript	-	0	7	0	0.557891
ENSG00000283294	5.80762	56.0104	0.0226768	0.38525	AP005212.4	18	14225224	14342505	+	3505	processed_transcript	novel transcript	-	7	0	0.0841449	0
ENSG00000285632	5.80762	56.0104	0.0226768	0.38525	AC084024.4	8	38223957	38231695	-	1039	bidirectional_promoter_lncRNA	novel transcript	-	7	0	0.283857	0
ENSG00000224452	-5.85862	58.0259	0.0226768	0.38525	RSL24D1P6	20	32170390	32170790	-	401	processed_pseudogene	ribosomal L24 domain containing 1 pseudogene 6 [Source:HGNC Symbol;Acc:HGNC:37876]	-	0	7	0	0.794404
ENSG00000270248	-5.85862	58.0259	0.0226768	0.38525	AC011468.4	19	52110318	52110726	-	409	processed_pseudogene	transmembrane protein 50B (TMEM50B) pseudogene	-	0	7	0	0.778865
ENSG00000272282	-5.85862	58.0259	0.0226768	0.38525	LINC02084	3	27712910	27714005	+	1096	lincRNA	long intergenic non-protein coding RNA 2084 [Source:HGNC Symbol;Acc:HGNC:52934]	-	0	7	0	0.290653
ENSG00000250330	-5.85862	58.0259	0.0226768	0.38525	AC016559.2	5	79229904	79230588	+	359	processed_pseudogene	GABA(A) receptor-associated protein-like 2 (GABARAPL2 ) pseudogene	-	0	7	0	0.887343
ENSG00000249326	5.80762	56.0104	0.0226768	0.38525	CTD-2194D22.4	5	1887332	1900493	+	1635	antisense	uncharacterized LOC101929081 [Source:NCBI gene;Acc:101929081]	-	7	0	0.180384	0
ENSG00000108556	-5.85862	58.0259	0.0226768	0.38525	CHRNE	17	4897774	4934438	-	2864	protein_coding	cholinergic receptor nicotinic epsilon subunit [Source:HGNC Symbol;Acc:HGNC:1966]	-	0	7	0	0.111228
ENSG00000170667	5.80762	56.0104	0.0226768	0.38525	RASA4B	7	102482445	102517781	-	4840	protein_coding	RAS p21 protein activator 4B [Source:HGNC Symbol;Acc:HGNC:35202]	-	7	0	0.0609355	0
ENSG00000271853	5.80762	56.0104	0.0226768	0.38525	AL162258.1	1	153626332	153634340	-	995	processed_transcript	novel transcript	-	7	0	0.29641	0
ENSG00000229839	5.80762	56.0104	0.0226768	0.38525	AC018462.1	2	62069447	62146881	-	1836	antisense	novel transcript	-	7	0	0.160636	0
ENSG00000130055	-5.85862	58.0259	0.0226768	0.38525	GDPD2	X	70423031	70433390	+	2638	protein_coding	glycerophosphodiester phosphodiesterase domain containing 2 [Source:HGNC Symbol;Acc:HGNC:25974]	-	0	7	0	0.120757
ENSG00000267811	5.80762	56.0104	0.0226768	0.38525	AP001160.2	11	62771120	62771606	-	487	antisense	novel transcript, antisense to TAF6L	-	7	0	0.605601	0
ENSG00000266826	-5.85862	58.0259	0.0226768	0.38525	AC011195.2	17	58660424	58692018	-	1486	protein_coding	novel protein similar to immunoglobulin (CD79A) binding protein 1 IGBP1	-	0	7	0	0.214371
ENSG00000146221	5.80762	56.0104	0.0226768	0.38525	TCTE1	6	44278743	44297688	-	3067	protein_coding	t-complex-associated-testis-expressed 1 [Source:HGNC Symbol;Acc:HGNC:11693]	-	7	0	0.0961617	0
ENSG00000198033	-5.85862	58.0259	0.0226768	0.38525	TUBA3C	13	19173770	19181852	-	1551	protein_coding	tubulin alpha 3c [Source:HGNC Symbol;Acc:HGNC:12408]	-	0	7	0	0.205387
ENSG00000254463	-5.85862	58.0259	0.0226768	0.38525	PPIAP41	11	43466392	43466871	+	480	processed_pseudogene	peptidylprolyl isomerase A pseudogene 41 [Source:HGNC Symbol;Acc:HGNC:53665]	-	0	7	0	0.663658
ENSG00000258521	-5.85862	58.0259	0.0226768	0.38525	AL157871.2	14	100339832	100340554	+	552	antisense	novel transcript, antisense to WARS	-	0	7	0	0.577094
ENSG00000267322	5.80762	56.0104	0.0226768	0.38525	SNHG22	18	49814023	49851059	+	2593	antisense	small nucleolar RNA host gene 22 [Source:HGNC Symbol;Acc:HGNC:50285]	-	7	0	0.11374	0
ENSG00000228022	-5.85862	58.0259	0.0226768	0.38525	HCG20	6	30766825	30792250	+	1371	lincRNA	HLA complex group 20 [Source:HGNC Symbol;Acc:HGNC:31334]	-	0	7	0	0.232353
ENSG00000273554	-5.85862	58.0259	0.0226768	0.38525	AC136616.1	KI270728.1	1139577	1147868	-	3660	protein_coding	solute carrier family 6 member 8 pseudogene [Source:NCBI gene;Acc:653562]	-	0	7	0	0.0870372
ENSG00000234936	-5.85862	58.0259	0.0226768	0.38525	AC010883.1	2	43229573	43233394	+	398	antisense	novel transcript	-	0	7	0	0.800392
ENSG00000246331	-5.85862	58.0259	0.0226768	0.38525	AC010198.1	12	30755074	30780739	+	1552	lincRNA	uncharacterized LOC645485 [Source:NCBI gene;Acc:645485]	-	0	7	0	0.205255
ENSG00000258745	5.80762	56.0104	0.0226768	0.38525	AL358334.3	14	50912226	50913358	+	535	antisense	novel transcript, antisense to PYGL	-	7	0	0.551267	0
ENSG00000260011	-5.85862	58.0259	0.0226768	0.38525	AC132938.1	17	82381110	82382690	-	360	lincRNA	novel transcript	-	0	7	0	0.884878
ENSG00000167807	-5.85862	58.0259	0.0226768	0.38525	AC011511.1	19	10305427	10316009	-	2090	protein_coding	novel transcript	-	0	7	0	0.152419
ENSG00000167483	5.80762	56.0104	0.0226768	0.38525	FAM129C	19	17523301	17553839	+	6628	protein_coding	family with sequence similarity 129 member C [Source:HGNC Symbol;Acc:HGNC:24130]	-	7	0	0.0444973	0
ENSG00000273056	-5.85862	58.0259	0.0226768	0.38525	AL354694.1	9	7786105	7786688	-	584	lincRNA	novel transcript	-	0	7	0	0.545473
ENSG00000240051	-5.85862	58.0259	0.0226768	0.38525	RPL23AP10	14	96456576	96457041	-	466	processed_pseudogene	ribosomal protein L23a pseudogene 10 [Source:HGNC Symbol;Acc:HGNC:19804]	-	0	7	0	0.683597
ENSG00000201499	-5.85862	58.0259	0.0226768	0.38525	RNU6-312P	2	200881715	200881821	-	107	snRNA	RNA, U6 small nuclear 312, pseudogene [Source:HGNC Symbol;Acc:HGNC:47275]	-	0	7	0	2.97716
ENSG00000248118	-5.85862	58.0259	0.0226768	0.38525	LINC01019	5	3417152	3536094	-	3199	lincRNA	long intergenic non-protein coding RNA 1019 [Source:HGNC Symbol;Acc:HGNC:27742]	-	0	7	0	0.0995799
ENSG00000253771	-5.85862	58.0259	0.0226768	0.38525	TPTE2P1	13	24924677	24968487	-	3790	transcribed_unprocessed_pseudogene	transmembrane phosphoinositide 3-phosphatase and tensin homolog 2 pseudogene 1 [Source:HGNC Symbol;Acc:HGNC:35196]	-	0	7	0	0.0840517
ENSG00000227200	-5.85862	58.0259	0.0226768	0.38525	AL162724.1	9	124262876	124265809	+	373	sense_intronic	novel transcript	-	0	7	0	0.854037
ENSG00000230702	5.80762	56.0104	0.0226768	0.38525	AC107081.1	2	61856695	61857055	+	361	processed_pseudogene	ribosomal protein L31 (RPL31) pseudogene	-	7	0	0.816975	0
ENSG00000254997	-5.85862	58.0259	0.0226768	0.38525	KRTAP5-9	11	71548418	71549553	+	1136	protein_coding	keratin associated protein 5-9 [Source:HGNC Symbol;Acc:HGNC:23604]	-	0	7	0	0.280419
ENSG00000230098	-5.85862	58.0259	0.0226768	0.38525	TCERG1L-AS1	10	131095218	131095777	+	472	antisense	TCERG1L antisense RNA 1 [Source:HGNC Symbol;Acc:HGNC:49532]	-	0	7	0	0.674907
ENSG00000270300	5.80762	56.0104	0.0226768	0.38525	PHACTR2P1	10	119793589	119816642	-	1573	transcribed_processed_pseudogene	phosphatase and actin regulator 2 pseudogene 1 [Source:HGNC Symbol;Acc:HGNC:49488]	-	7	0	0.187494	0
ENSG00000255819	-5.85862	58.0259	0.0226768	0.38525	KLRC4-KLRK1	12	10372353	10410146	-	2592	protein_coding	KLRC4-KLRK1 readthrough [Source:HGNC Symbol;Acc:HGNC:48357]	-	0	7	0	0.1229
ENSG00000268423	-5.85862	58.0259	0.0226768	0.38525	AC093503.1	19	46547056	46600861	-	845	sense_intronic	novel transcript, sense intronic to PPP5D1	-	0	7	0	0.376989
ENSG00000279670	-5.85862	58.0259	0.0226768	0.38525	AL359922.3	9	21892188	21893857	+	1670	TEC	TEC	-	0	7	0	0.190752
ENSG00000257279	-5.85862	58.0259	0.0226768	0.38525	AC127164.1	12	116977442	116987337	-	4196	antisense	uncharacterized LOC100506551 [Source:NCBI gene;Acc:100506551]	-	0	7	0	0.075919
ENSG00000266869	-5.85862	58.0259	0.0226768	0.38525	AC005993.1	14	71848606	71908430	+	397	lincRNA	novel transcript	-	0	7	0	0.802408
ENSG00000273451	-5.85862	58.0259	0.0226768	0.38525	AL031666.3	20	47348137	47349142	-	1006	sense_intronic	novel transcript, sense intronic to ZMYND8	-	0	7	0	0.316656
ENSG00000267582	-5.85862	58.0259	0.0226768	0.38525	AC020916.2	19	13796574	13796933	-	360	antisense	novel transcript, antisense to ZSWIM4	-	0	7	0	0.884878
ENSG00000230189	-5.85862	58.0259	0.0226768	0.38525	AC008267.2	7	66427949	66453634	-	981	transcribed_unprocessed_pseudogene	RAB guanine nucleotide exchange factor 1 (RABGEF1) pseudogene	-	0	7	0	0.324726
ENSG00000268603	-5.85862	58.0259	0.0226768	0.38525	AC053503.5	2	219497611	219498246	-	636	antisense	novel transcript, antisense to SPEG	-	0	7	0	0.500874
ENSG00000275708	5.80762	56.0104	0.0226768	0.38525	MIR3648-1	21	8208473	8208652	+	180	miRNA	microRNA 3648-1 [Source:HGNC Symbol;Acc:HGNC:38941]	-	7	0	1.63849	0
ENSG00000185053	-5.85862	58.0259	0.0226768	0.38525	SGCZ	8	14089864	15238339	-	2234	protein_coding	sarcoglycan zeta [Source:HGNC Symbol;Acc:HGNC:14075]	-	0	7	0	0.142594
ENSG00000109061	-5.85862	58.0259	0.0226768	0.38525	MYH1	17	10492307	10518543	-	6024	protein_coding	myosin heavy chain 1 [Source:HGNC Symbol;Acc:HGNC:7567]	-	0	7	0	0.0528811
ENSG00000266117	-5.85862	58.0259	0.0226768	0.38525	FBXO36P1	17	68095068	68095757	+	471	processed_pseudogene	F-box protein 36 pseudogene 1 [Source:HGNC Symbol;Acc:HGNC:50363]	-	0	7	0	0.67634
ENSG00000239096	-5.85862	58.0259	0.0226768	0.38525	RF01210	3	179614775	179614878	-	104	snoRNA		-	0	7	0	3.06304
ENSG00000280277	-5.85862	58.0259	0.0226768	0.38525	AL079342.3	6	88964527	88966587	+	2061	TEC	TEC	-	0	7	0	0.154564
ENSG00000261655	-5.85862	58.0259	0.0226768	0.38525	AC100803.2	8	141353403	141355365	-	1963	sense_overlapping	novel transcript, overlapping to GPR20	-	0	7	0	0.16228
ENSG00000255160	-5.85862	58.0259	0.0226768	0.38525	AC009652.1	11	19299883	19308358	+	648	lincRNA	novel transcript	-	0	7	0	0.491599
ENSG00000229751	-5.85862	58.0259	0.0226768	0.38525	AC044781.1	10	13991815	14007526	+	570	antisense	novel transcript	-	0	7	0	0.55887
ENSG00000258707	5.80762	56.0104	0.0226768	0.38525	AC023310.2	15	20626819	20627365	-	547	processed_pseudogene	ring finger protein 145 (RNF145) pseudogene	-	7	0	0.539174	0
ENSG00000279289	5.80762	56.0104	0.0226768	0.38525	AL136164.3	6	71386852	71390829	-	3978	TEC	TEC	-	7	0	0.0741397	0
ENSG00000205584	5.80762	56.0104	0.0226768	0.38525	AC211476.1	7	72969814	72971727	+	468	unprocessed_pseudogene	FK506 binding protein 6, 36kDa (FKBP6 ) pseudogene	-	7	0	0.630188	0
ENSG00000226239	-5.85862	58.0259	0.0226768	0.38525	AL031658.1	20	32027753	32031575	-	2013	antisense	novel transcript	-	0	7	0	0.158249
ENSG00000280387	5.80762	56.0104	0.0226768	0.38525	AL109806.1	20	56522252	56523499	+	1248	TEC	TEC	-	7	0	0.23632	0
ENSG00000267959	-5.85862	58.0259	0.0226768	0.38525	MIR3188	19	18282077	18282161	+	85	miRNA	microRNA 3188 [Source:HGNC Symbol;Acc:HGNC:38226]	-	0	7	0	3.74772
ENSG00000228677	-5.85862	58.0259	0.0226768	0.38525	TTC3-AS1	21	37187666	37193926	-	1097	antisense	TTC3 antisense RNA 1 [Source:HGNC Symbol;Acc:HGNC:40595]	-	0	7	0	0.290388
ENSG00000136535	5.80762	56.0104	0.0226768	0.38525	TBR1	2	161416094	161425870	+	9600	protein_coding	T-box, brain 1 [Source:HGNC Symbol;Acc:HGNC:11590]	T-box	7	0	0.0307217	0
ENSG00000213842	-5.85862	58.0259	0.0226768	0.38525	SUGT1P2	3	32752910	32753901	+	992	processed_pseudogene	SUGT1 pseudogene 2 [Source:HGNC Symbol;Acc:HGNC:31377]	-	0	7	0	0.321125
ENSG00000214195	-5.85862	58.0259	0.0226768	0.38525	HMGN2P31	9	5311444	5311716	+	273	processed_pseudogene	high mobility group nucleosomal binding domain 2 pseudogene 31 [Source:HGNC Symbol;Acc:HGNC:39398]	-	0	7	0	1.16687
ENSG00000276203	-5.85862	58.0259	0.0226768	0.38525	ANKRD20A3	9	66106815	66153135	-	7672	protein_coding	ankyrin repeat domain 20 family member A3 [Source:HGNC Symbol;Acc:HGNC:31981]	-	0	7	0	0.0415219
ENSG00000256222	5.80762	56.0104	0.0226768	0.38525	MTRNR2L3	20	57358442	57359980	-	1539	protein_coding	MT-RNR2 like 3 [Source:HGNC Symbol;Acc:HGNC:37157]	-	7	0	0.191636	0
ENSG00000229955	-5.85862	58.0259	0.0226768	0.38525	Z98749.1	22	38387918	38388857	-	541	sense_intronic	novel transcript, sense intronic to CSNK1E	-	0	7	0	0.588828
ENSG00000266922	5.80762	56.0104	0.0226768	0.38525	AC008543.3	19	11725961	11730783	-	491	sense_intronic	novel transcript, sense intronic to ZNF823	-	7	0	0.600668	0
ENSG00000242737	-5.85862	58.0259	0.0226768	0.38525	AC012170.1	15	50466738	50467096	+	359	processed_pseudogene	ribosomal protein S20 (RPS20) pseudogene	-	0	7	0	0.887343
ENSG00000250090	-5.85862	58.0259	0.0226768	0.38525	AL390198.2	20	25835985	25836832	-	222	unprocessed_pseudogene	novel zinc finger pseudogene	-	0	7	0	1.43494
ENSG00000200816	-5.85862	58.0259	0.0226768	0.38525	SNORA38	6	31623079	31623210	+	132	snoRNA	small nucleolar RNA, H/ACA box 38 [Source:HGNC Symbol;Acc:HGNC:32631]	-	0	7	0	2.4133
ENSG00000181291	5.80762	56.0104	0.0226768	0.38525	TMEM132E	17	34579487	34639318	+	6115	protein_coding	transmembrane protein 132E [Source:HGNC Symbol;Acc:HGNC:26991]	-	7	0	0.0482302	0
ENSG00000268790	-5.85862	58.0259	0.0226768	0.38525	AC008764.4	19	16577642	16660115	-	1184	protein_coding	novel protein	-	0	7	0	0.269051
ENSG00000261668	-5.85862	58.0259	0.0226768	0.38525	AC093591.2	4	127840198	127844040	-	3843	antisense	novel transcript, antisense HSPA4L	-	0	7	0	0.0828925
ENSG00000127083	-5.85862	58.0259	0.0226768	0.38525	OMD	9	92414245	92424461	-	2449	protein_coding	osteomodulin [Source:HGNC Symbol;Acc:HGNC:8134]	-	0	7	0	0.130076
ENSG00000225581	5.80762	56.0104	0.0226768	0.38525	TRIM53AP	11	89993536	89999741	-	1544	unprocessed_pseudogene	tripartite motif containing 53A, pseudogene [Source:HGNC Symbol;Acc:HGNC:19025]	-	7	0	0.191015	0
ENSG00000225354	5.80762	56.0104	0.0226768	0.38525	RPL7AP52	10	94882554	94883343	+	790	processed_pseudogene	ribosomal protein L7a pseudogene 52 [Source:HGNC Symbol;Acc:HGNC:36233]	-	7	0	0.373326	0
ENSG00000202150	-5.85862	58.0259	0.0226768	0.38525	RNU6-407P	20	35030317	35030420	-	104	snRNA	RNA, U6 small nuclear 407, pseudogene [Source:HGNC Symbol;Acc:HGNC:47370]	-	0	7	0	3.06304
ENSG00000276645	-5.85862	58.0259	0.0226768	0.38525	RF00017	1	33029232	33029576	-	345	misc_RNA		-	0	7	0	0.923351
ENSG00000266262	5.80762	56.0104	0.0226768	0.38525	MIR4428	1	237471119	237471191	+	73	miRNA	microRNA 4428 [Source:HGNC Symbol;Acc:HGNC:41667]	-	7	0	4.04011	0
ENSG00000276520	-5.85862	58.0259	0.0226768	0.38525	CR589904.2	1	248708202	248708641	+	440	processed_pseudogene	TGF-beta activated kinase 1/MAP3K7 binding protein 2 (TAB2) pseudogene	-	0	7	0	0.723991
ENSG00000224891	-5.85862	58.0259	0.0226768	0.38525	AC007899.1	2	37148530	37149304	+	775	processed_pseudogene	chromosome 11 open reading frame 46 (C11orf46) pseudogene	-	0	7	0	0.41104
ENSG00000253496	-5.85862	58.0259	0.0226768	0.38525	AC011586.2	8	16598758	16915044	-	1892	lincRNA	novel transcript	-	0	7	0	0.16837
ENSG00000270236	-5.85862	58.0259	0.0226768	0.38525	AL162730.1	9	69107926	69108217	-	292	processed_pseudogene	adenylate kinase 3 (AK3) pseudogene	-	0	7	0	1.09095
ENSG00000241129	-5.85862	58.0259	0.0226768	0.38525	RPL22P19	12	124935455	124935895	-	441	transcribed_processed_pseudogene	ribosomal protein L22 pseudogene 19 [Source:HGNC Symbol;Acc:HGNC:36567]	-	0	7	0	0.722349
ENSG00000259490	-5.85862	58.0259	0.0226768	0.38525	IGHV3OR15-7	15	19987656	19988117	-	359	IG_V_gene	immunoglobulin heavy variable 3/OR15-7 (pseudogene) [Source:HGNC Symbol;Acc:HGNC:5633]	-	0	7	0	0.887343
ENSG00000229173	-5.85862	58.0259	0.0226768	0.38525	AC108059.1	2	128139792	128140516	-	725	processed_pseudogene	spermidine synthase (SRM) pseudogene	-	0	7	0	0.439388
ENSG00000202322	5.80762	56.0104	0.0226768	0.38525	RNA5SP131	3	50419781	50419899	+	119	rRNA_pseudogene	RNA, 5S ribosomal pseudogene 131 [Source:HGNC Symbol;Acc:HGNC:43031]	-	7	0	2.47839	0
ENSG00000249483	-5.85862	58.0259	0.0226768	0.38525	AC026726.1	5	81851601	81852201	+	601	lincRNA	novel transcript	-	0	7	0	0.530043
ENSG00000277332	-5.85862	58.0259	0.0226768	0.38525	AC108002.2	8	142638596	142640648	+	503	antisense	uncharacterized LOC101928087 [Source:NCBI gene;Acc:101928087]	-	0	7	0	0.633312
ENSG00000227917	-5.85862	58.0259	0.0226768	0.38525	AL449043.1	9	100804	102941	-	772	lincRNA	novel transcript	-	0	7	0	0.412637
ENSG00000255092	-5.85862	58.0259	0.0226768	0.38525	AC010768.2	11	44606170	44608101	-	567	antisense	novel transcript	-	0	7	0	0.561827
ENSG00000200506	-5.85862	58.0259	0.0226768	0.38525	RF00019	14	99583017	99583118	+	102	misc_RNA		-	0	7	0	3.1231
ENSG00000261122	-5.85862	58.0259	0.0226768	0.38525	LINC02167	16	35743268	35756515	+	1989	lincRNA	long intergenic non-protein coding RNA 2167 [Source:HGNC Symbol;Acc:HGNC:53028]	-	0	7	0	0.160159
ENSG00000134775	1.04358	2.06134	0.022707	0.385506	FHOD3	18	36297714	36780055	+	7965	protein_coding	formin homology 2 domain containing 3 [Source:HGNC Symbol;Acc:HGNC:26178]	-	201	94	1.06323	0.537069
ENSG00000183569	-1.08241	2.11757	0.0229252	0.38756	SERHL2	22	42553617	42574382	+	2821	protein_coding	serine hydrolase like 2 [Source:HGNC Symbol;Acc:HGNC:29446]	-	67	137	1.00067	2.21007
ENSG00000186838	-1.16457	2.24166	0.0230304	0.38756	SELENOV	19	39515113	39520686	+	1731	protein_coding	selenoprotein V [Source:HGNC Symbol;Acc:HGNC:30399]	-	36	78	0.87624	2.05062
ENSG00000235217	2.0027	4.0075	0.0230709	0.38756	TSPY26P	20	32186477	32190527	-	4051	transcribed_processed_pseudogene	testis specific protein Y-linked 26, pseudogene [Source:HGNC Symbol;Acc:HGNC:16256]	-	17	4	0.176809	0.0449351
ENSG00000260727	2.0027	4.0075	0.0230709	0.38756	SLC7A5P1	16	29613104	29613640	-	537	unprocessed_pseudogene	solute carrier family 7 member 5 pseudogene 1 [Source:HGNC Symbol;Acc:HGNC:29458]	-	17	4	1.33381	0.338979
ENSG00000229334	-2.10457	4.30071	0.0230709	0.38756	AC046143.1	3	194632923	194645401	+	972	antisense	novel transcript	-	4	17	0.173385	0.795922
ENSG00000231527	-2.10457	4.30071	0.0230709	0.38756	CR769775.1	9	61972240	61976380	+	1940	processed_transcript	novel transcript	-	4	17	0.0868713	0.398781
ENSG00000226363	-2.10457	4.30071	0.0230709	0.38756	HAGLROS	2	176177717	176179008	+	1121	lincRNA	HAGLR opposite strand lncRNA [Source:HGNC Symbol;Acc:HGNC:50646]	-	4	17	0.150339	0.69013
ENSG00000278048	-2.10457	4.30071	0.0230709	0.38756	RF00004	17	43251829	43252019	-	191	snRNA		-	4	17	0.882357	4.05045
ENSG00000240207	-2.10457	4.30071	0.0230709	0.38756	AC080013.1	3	158732263	158784070	+	4177	antisense	novel transcript, antisense to RARRES1	-	4	17	0.0403472	0.185213
ENSG00000225051	-2.10457	4.30071	0.0230709	0.38756	HMGB3P22	5	179679032	179694768	+	825	transcribed_processed_pseudogene	high mobility group box 3 pseudogene 22 [Source:HGNC Symbol;Acc:HGNC:39314]	-	4	17	0.204279	0.937741
ENSG00000279405	-2.10457	4.30071	0.0230709	0.38756	AC004696.2	19	56480397	56483977	-	331	TEC	novel transcript	-	4	17	0.509155	2.33727
ENSG00000205452	-2.10457	4.30071	0.0230709	0.38756	AC140658.1	16	33964547	33976346	-	2586	processed_transcript	novel transcript	-	4	17	0.0651702	0.299163
ENSG00000237017	-1.16765	2.24645	0.0231639	0.388641	AC245052.4	19	54119511	54125343	-	4158	antisense	novel transcript	-	35	76	0.354651	0.831796
ENSG00000223564	-1.05991	2.0848	0.0231657	0.388641	CYP4F32P	2	94759259	94760279	-	504	unprocessed_pseudogene	cytochrome P450 family 4 subfamily F member 32, pseudogene [Source:HGNC Symbol;Acc:HGNC:39951]	-	78	157	6.52052	14.1761
ENSG00000172183	-1.03436	2.0482	0.0235103	0.392746	ISG20	15	88636153	88656483	+	7363	protein_coding	interferon stimulated exonuclease gene 20 [Source:HGNC Symbol;Acc:HGNC:6130]	-	88	174	0.503554	1.07543
ENSG00000283930	-1.178	2.26262	0.0235898	0.393431	AL117339.5	10	38094368	38360098	+	3955	protein_coding	novel transcript	-	32	70	0.340896	0.805451
ENSG00000163393	-1.0287	2.04019	0.0237061	0.394855	SLC22A15	1	115976498	116070054	+	5292	protein_coding	solute carrier family 22 member 15 [Source:HGNC Symbol;Acc:HGNC:20301]	-	98	193	0.780233	1.65968
ENSG00000240429	-1.18187	2.26871	0.0237407	0.394915	LRRFIP1P1	3	179259028	179261273	-	2246	processed_pseudogene	LRR binding FLII interacting protein 1 pseudogene 1 [Source:HGNC Symbol;Acc:HGNC:32937]	-	31	68	0.581527	1.3778
ENSG00000102043	1.21592	2.32288	0.0237407	0.394915	MTMR8	X	64268081	64395431	-	2782	protein_coding	myotubularin related protein 8 [Source:HGNC Symbol;Acc:HGNC:16825]	-	70	29	1.06013	0.474382
ENSG00000271270	-1.11246	2.16213	0.023905	0.397131	TMCC1-AS1	3	129893811	129918575	+	4683	antisense	TMCC1 antisense RNA 1 (head to head) [Source:HGNC Symbol;Acc:HGNC:49060]	-	45	94	0.404861	0.913464
ENSG00000120049	-1.19038	2.28213	0.024056	0.398861	KCNIP2	10	101825974	101843920	-	3397	protein_coding	potassium voltage-gated channel interacting protein 2 [Source:HGNC Symbol;Acc:HGNC:15522]	-	29	64	0.359683	0.857378
ENSG00000214389	-1.00194	2.0027	0.0244635	0.402997	RPS3AP26	7	98385801	98386584	-	784	processed_pseudogene	ribosomal protein S3a pseudogene 26 [Source:HGNC Symbol;Acc:HGNC:36513]	-	134	259	7.20123	15.0339
ENSG00000256616	1.84873	3.60182	0.0245106	0.402997	AP002414.2	18	12073232	12076654	-	3423	transcribed_processed_pseudogene	G protein-coupled receptor 125 (GPR125) pseudogene	-	19	5	0.233865	0.0664738
ENSG00000257433	-1.95094	3.86628	0.0245106	0.402997	AC004241.1	12	47706085	47742294	+	4411	antisense	uncharacterized LOC105369748 [Source:NCBI gene;Acc:105369748]	-	5	19	0.0477585	0.196022
ENSG00000127954	-1.95094	3.86628	0.0245106	0.402997	STEAP4	7	88270892	88306891	-	11245	protein_coding	STEAP4 metalloreductase [Source:HGNC Symbol;Acc:HGNC:21923]	-	5	19	0.0187339	0.0768921
ENSG00000280152	-1.95094	3.86628	0.0245106	0.402997	AC009078.3	16	75245994	75250077	-	4084	TEC	TEC	-	5	19	0.0515825	0.211717
ENSG00000253194	-1.95094	3.86628	0.0245106	0.402997	AL137009.1	6	118934770	119182745	+	1812	antisense	novel transcript, antisense to FAM184A	-	5	19	0.11626	0.477181
ENSG00000266490	-1.95094	3.86628	0.0245106	0.402997	AC127024.5	17	30792372	30792833	+	462	lincRNA	novel transcript	-	5	19	0.45598	1.87154
ENSG00000266934	-1.95094	3.86628	0.0245106	0.402997	AC005746.1	17	61382785	61384680	+	1329	sense_intronic	novel transcript, sense intronic to BCAS3	-	5	19	0.158512	0.650603
ENSG00000267348	-1.95094	3.86628	0.0245106	0.402997	GEMIN7-AS1	19	45076510	45090391	-	1002	antisense	GEMIN7 antisense RNA 1 [Source:HGNC Symbol;Acc:HGNC:53773]	-	5	19	0.210242	0.862926
ENSG00000254812	-1.95094	3.86628	0.0245106	0.402997	AC067930.3	8	143632071	143633756	-	701	antisense	novel transcript	-	5	19	0.300518	1.23345
ENSG00000120669	-1.02634	2.03685	0.0245477	0.403088	SOHLH2	13	36168208	36214615	-	3399	protein_coding	spermatogenesis and oogenesis specific basic helix-loop-helix 2 [Source:HGNC Symbol;Acc:HGNC:26026]	bHLH	89	175	1.10321	2.34301
ENSG00000285728	-1.13687	2.19904	0.0246936	0.404829	AC098484.4	1	42658687	42682160	-	2041	antisense	novel transcript, antisense to PPIH	-	40	85	0.825724	1.89524
ENSG00000221947	-1.07278	2.10348	0.0247172	0.404829	XKR9	8	70669365	70790371	+	3905	protein_coding	XK related 9 [Source:HGNC Symbol;Acc:HGNC:20937]	-	64	130	0.690521	1.51499
ENSG00000224934	-1.09107	2.13032	0.0247643	0.405341	AL391684.1	10	99430919	99461743	+	6898	bidirectional_promoter_lncRNA	novel transcript	-	52	107	0.317613	0.705908
ENSG00000179344	1.14541	2.21208	0.0248689	0.406532	HLA-DQB1	6	32659467	32668383	-	4904	protein_coding	major histocompatibility complex, class II, DQ beta 1 [Source:HGNC Symbol;Acc:HGNC:4944]	-	85	37	0.730275	0.343352
ENSG00000234911	-1.288	2.44189	0.0251076	0.409909	TEX21P	14	64341673	64387986	-	3162	transcribed_unitary_pseudogene	testis expressed 21, pseudogene [Source:HGNC Symbol;Acc:HGNC:35455]	-	22	52	0.293142	0.748392
ENSG00000232682	-1.288	2.44189	0.0251076	0.409909	AL592430.1	10	60050668	60060743	+	1608	antisense	novel transcript, antisense to ANK3	-	22	52	0.57644	1.47165
ENSG00000259848	-1.09427	2.13506	0.0254206	0.412642	AC097374.1	2	94867486	94947341	-	7136	transcribed_unprocessed_pseudogene	uncharacterized LOC442028 [Source:NCBI gene;Acc:442028]	-	48	99	0.283403	0.631347
ENSG00000278635	-1.14598	2.21297	0.0254355	0.412642	AC141557.2	12	9415641	9416718	+	482	unprocessed_pseudogene	WAS protein family homolog 1 (WASH1) pseudogene	-	36	77	3.14683	7.26995
ENSG00000155846	1.02785	2.03899	0.0254582	0.412642	PPARGC1B	5	149730298	149855022	+	12889	protein_coding	PPARG coactivator 1 beta [Source:HGNC Symbol;Acc:HGNC:30022]	-	165	78	0.539365	0.275399
ENSG00000213865	-1.02379	2.03326	0.0254582	0.412642	C8orf44	8	66667615	66685564	+	2505	protein_coding	chromosome 8 open reading frame 44 [Source:HGNC Symbol;Acc:HGNC:25646]	-	81	159	1.36237	2.88853
ENSG00000249413	-1.8374	3.57365	0.0254753	0.412642	AC116049.2	4	65998846	66150012	+	754	lincRNA	novel transcript	-	6	21	0.335272	1.26746
ENSG00000102385	-1.8374	3.57365	0.0254753	0.412642	DRP2	X	101219769	101264497	+	8187	protein_coding	dystrophin related protein 2 [Source:HGNC Symbol;Acc:HGNC:3032]	-	6	21	0.0308777	0.11673
ENSG00000267698	-1.8374	3.57365	0.0254753	0.412642	AC002116.2	19	36014508	36045972	+	643	antisense	uncharacterized LOC101927572 [Source:NCBI gene;Acc:101927572]	-	6	21	0.39315	1.48626
ENSG00000269243	-1.8374	3.57365	0.0254753	0.412642	AC008894.2	19	16123661	16139892	-	3927	antisense	novel transcript, antisense RAB8A	-	6	21	0.0643737	0.243358
ENSG00000232300	-1.8374	3.57365	0.0254753	0.412642	FAM215B	17	46558830	46562795	-	2183	lincRNA	family with sequence similarity 215 member B [Source:HGNC Symbol;Acc:HGNC:43639]	-	6	21	0.115802	0.437777
ENSG00000198467	-1.30948	2.47852	0.0254851	0.412642	TPM2	9	35681992	35690121	-	3248	protein_coding	tropomyosin 2 [Source:HGNC Symbol;Acc:HGNC:12011]	-	20	48	0.259437	0.672532
ENSG00000119514	1.26486	2.40303	0.0254851	0.412642	GALNT12	9	98807699	98850081	+	3137	protein_coding	polypeptide N-acetylgalactosaminyltransferase 12 [Source:HGNC Symbol;Acc:HGNC:19877]	-	50	20	0.671542	0.290137
ENSG00000280739	-1.32176	2.49971	0.0256753	0.414652	EIF1B-AS1	3	40173145	40309698	-	5433	processed_transcript	EIF1B antisense RNA 1 [Source:HGNC Symbol;Acc:HGNC:44555]	-	19	46	0.147344	0.385306
ENSG00000253327	-1.32176	2.49971	0.0256753	0.414652	RAD21-AS1	8	116874424	116876868	+	2010	antisense	RAD21 antisense RNA 1 [Source:HGNC Symbol;Acc:HGNC:32158]	-	19	46	0.398268	1.04148
ENSG00000244558	-1.32176	2.49971	0.0256753	0.414652	KCNK15-AS1	20	44694892	44746021	-	1226	antisense	KCNK15 and WISP2 antisense RNA 1 [Source:HGNC Symbol;Acc:HGNC:49901]	-	19	46	0.652952	1.70748
ENSG00000153291	-1.01369	2.01906	0.0258364	0.416671	SLC25A27	6	46652915	46678193	+	3288	protein_coding	solute carrier family 25 member 27 [Source:HGNC Symbol;Acc:HGNC:21065]	-	98	191	1.25578	2.64356
ENSG00000224165	-1.15131	2.22115	0.0258508	0.416671	DNAJC27-AS1	2	24971390	25039694	+	5651	antisense	DNAJC27 antisense RNA 1 [Source:HGNC Symbol;Acc:HGNC:42943]	-	34	73	0.253496	0.587875
ENSG00000224728	-1.33527	2.52323	0.0258645	0.416671	IMPDH1P8	3	15878047	15879571	+	1525	processed_pseudogene	inosine monophosphate dehydrogenase 1 pseudogene 8 [Source:HGNC Symbol;Acc:HGNC:33963]	-	18	44	0.497302	1.31302
ENSG00000273145	-1.07572	2.10778	0.0259274	0.417391	BX537318.1	22	46013606	46015498	+	1207	lincRNA	novel transcript	-	56	114	1.95478	4.29819
ENSG00000234028	-1.01729	2.02412	0.0259736	0.417391	AC062029.1	2	88627539	88631821	+	4283	antisense	uncharacterized LOC101928403 [Source:NCBI gene;Acc:101928403]	-	87	170	0.855833	1.80629
ENSG00000171903	-1.06135	2.08689	0.0259786	0.417391	CYP4F11	19	15912367	15934867	-	4027	protein_coding	cytochrome P450 family 4 subfamily F member 11 [Source:HGNC Symbol;Acc:HGNC:13265]	-	66	133	0.690526	1.503
ENSG00000241484	-1.06135	2.08689	0.0259786	0.417391	ARHGAP8	22	44752558	44862788	+	4990	protein_coding	Rho GTPase activating protein 8 [Source:HGNC Symbol;Acc:HGNC:677]	-	66	133	0.557264	1.21294
ENSG00000143995	-1.1542	2.22562	0.026071	0.417391	MEIS1	2	66433452	66573869	+	10934	protein_coding	Meis homeobox 1 [Source:HGNC Symbol;Acc:HGNC:7000]	Homeobox	33	71	0.127161	0.295506
ENSG00000136883	-1.07615	2.10841	0.0261015	0.417391	KIF12	9	114086126	114099291	-	3036	protein_coding	kinesin family member 12 [Source:HGNC Symbol;Acc:HGNC:21495]	-	55	112	0.763271	1.67882
ENSG00000197467	-1.74981	3.36314	0.0261053	0.417391	COL13A1	10	69801867	69964275	+	5888	protein_coding	collagen type XIII alpha 1 chain [Source:HGNC Symbol;Acc:HGNC:2190]	-	7	23	0.0500897	0.177766
ENSG00000162174	1.64718	3.1322	0.0261053	0.417391	ASRGL1	11	62337448	62393412	+	4586	protein_coding	asparaginase like 1 [Source:HGNC Symbol;Acc:HGNC:16448]	-	23	7	0.211306	0.0694627
ENSG00000087085	-1.74981	3.36314	0.0261053	0.417391	ACHE	7	100889994	100896974	-	3783	protein_coding	acetylcholinesterase (Cartwright blood group) [Source:HGNC Symbol;Acc:HGNC:108]	-	7	23	0.0779614	0.276681
ENSG00000124479	-1.74981	3.36314	0.0261053	0.417391	NDP	X	43948776	43973504	-	1928	protein_coding	NDP, norrin cystine knot growth factor [Source:HGNC Symbol;Acc:HGNC:7678]	-	7	23	0.152971	0.542886
ENSG00000198010	-1.74981	3.36314	0.0261053	0.417391	DLGAP2	8	737596	1708474	+	15159	protein_coding	DLG associated protein 2 [Source:HGNC Symbol;Acc:HGNC:2906]	-	7	23	0.0194556	0.069047
ENSG00000105251	-1.36683	2.57904	0.0262297	0.418021	SHD	19	4278601	4290724	+	2811	protein_coding	Src homology 2 domain containing transforming protein D [Source:HGNC Symbol;Acc:HGNC:30633]	-	16	40	0.239815	0.64757
ENSG00000238062	-1.36683	2.57904	0.0262297	0.418021	SPATA3-AS1	2	230984368	230996032	-	3693	lincRNA	SPATA3 antisense RNA 1 (head to head) [Source:HGNC Symbol;Acc:HGNC:28013]	-	16	40	0.18254	0.492911
ENSG00000272692	-1.36683	2.57904	0.0262297	0.418021	AC010997.3	10	75409157	75411842	+	1890	lincRNA	uncharacterized LOC101929234 [Source:NCBI gene;Acc:101929234]	-	16	40	0.356678	0.963132
ENSG00000263503	-1.15727	2.23036	0.0263	0.418021	MAPK8IP1P2	17	45600869	45602340	-	1472	processed_pseudogene	mitogen-activated protein kinase 8 interacting protein 1 pseudogene 2 [Source:HGNC Symbol;Acc:HGNC:52402]	-	32	69	0.915925	2.13319
ENSG00000133121	1.03442	2.04829	0.0263667	0.418021	STARD13	13	33103135	33350630	-	8388	protein_coding	StAR related lipid transfer domain containing 13 [Source:HGNC Symbol;Acc:HGNC:19164]	-	170	80	0.853903	0.43403
ENSG00000101230	1.5773	2.98411	0.0264977	0.418021	ISM1	20	13221771	13300651	+	2593	protein_coding	isthmin 1 [Source:HGNC Symbol;Acc:HGNC:16213]	-	25	8	0.406214	0.140403
ENSG00000270108	-1.68007	3.20443	0.0264977	0.418021	AL049840.5	14	103687576	103688127	+	552	sense_intronic	novel transcript, sense intronic to KLC1	-	8	25	0.610617	2.06105
ENSG00000113083	-1.16054	2.2354	0.0265384	0.418021	LOX	5	122063195	122078360	-	5547	protein_coding	lysyl oxidase [Source:HGNC Symbol;Acc:HGNC:6664]	-	31	67	0.235462	0.549673
ENSG00000247121	1.1952	2.28976	0.0265384	0.418021	AC009126.1	5	96814028	96935809	-	2536	antisense	novel transcript, antisense to LNPEP and ERAP2	-	69	29	1.14635	0.520399
ENSG00000223969	-1.16054	2.2354	0.0265384	0.418021	AC002456.1	7	90590619	90597353	-	616	antisense	novel transcript	-	31	67	2.12031	4.94973
ENSG00000171291	-1.40634	2.65064	0.0265521	0.418021	ZNF439	19	11848726	11883750	+	5207	protein_coding	zinc finger protein 439 [Source:HGNC Symbol;Acc:HGNC:20873]	zf-C2H2	14	36	0.113281	0.314632
ENSG00000072201	-1.40634	2.65064	0.0265521	0.418021	LNX1	4	53459301	53701405	-	5725	protein_coding	ligand of numb-protein X 1 [Source:HGNC Symbol;Acc:HGNC:6657]	-	14	36	0.103032	0.286164
ENSG00000184226	1.01821	2.02541	0.0266458	0.418021	PCDH9	13	66302834	67230445	-	30944	protein_coding	protocadherin 9 [Source:HGNC Symbol;Acc:HGNC:8661]	-	166	79	0.226021	0.116182
ENSG00000106991	-1.43008	2.69462	0.0266824	0.418021	ENG	9	127815012	127854756	-	3935	protein_coding	endoglin [Source:HGNC Symbol;Acc:HGNC:3349]	-	13	34	0.139193	0.393208
ENSG00000262692	-1.43008	2.69462	0.0266824	0.418021	AC116914.2	17	3721628	3722488	+	291	antisense	novel transcript, antisense to ITGAE	-	13	34	1.88221	5.31709
ENSG00000232909	-1.43008	2.69462	0.0266824	0.418021	AL157823.2	6	35733867	35736947	-	669	antisense	novel transcript	-	13	34	0.818719	2.31281
ENSG00000275011	-1.43008	2.69462	0.0266824	0.418021	AC129492.6	17	8063936	8072533	+	1305	unprocessed_pseudogene	arachidonate 15-lipoxygenase, type B (ALOX15B) pseudogene	-	13	34	0.419711	1.18565
ENSG00000233220	-1.62316	3.0805	0.02672	0.418021	LINC00167	11	130002938	130004356	+	1419	lincRNA	long intergenic non-protein coding RNA 167 [Source:HGNC Symbol;Acc:HGNC:30468]	-	9	27	0.267226	0.865903
ENSG00000106125	-1.62316	3.0805	0.02672	0.418021	MINDY4	7	30771417	30892387	+	7336	protein_coding	MINDY lysine 48 deubiquitinase 4 [Source:HGNC Symbol;Acc:HGNC:21916]	-	9	27	0.0516893	0.167491
ENSG00000255046	-1.62316	3.0805	0.02672	0.418021	AC069185.1	8	11797928	11802568	-	1091	lincRNA	novel transcript	-	9	27	0.347565	1.12623
ENSG00000205361	-1.164	2.24079	0.0267866	0.418021	MT1DP	16	56643705	56644786	+	191	transcribed_unprocessed_pseudogene	metallothionein 1D, pseudogene [Source:HGNC Symbol;Acc:HGNC:7396]	-	30	65	6.61768	15.487
ENSG00000254851	1.47286	2.77571	0.0268201	0.418021	AP005018.2	11	117135528	117138582	+	822	unprocessed_pseudogene	proprotein convertase subtilisin/kexin type 7 (PCSK7) pseudogene	-	29	10	1.48643	0.553625
ENSG00000278416	-1.57582	2.98104	0.0268201	0.418021	PMS2P2	7	75344015	75359550	-	1128	unprocessed_pseudogene	PMS1 homolog 2, mismatch repair system component pseudogene 2 [Source:HGNC Symbol;Acc:HGNC:9127]	-	10	29	0.373516	1.16998
ENSG00000156886	-1.57582	2.98104	0.0268201	0.418021	ITGAD	16	31393312	31426505	+	4411	protein_coding	integrin subunit alpha D [Source:HGNC Symbol;Acc:HGNC:6146]	-	10	29	0.095517	0.299191
ENSG00000272009	-1.11821	2.17078	0.0268226	0.418021	AL121944.1	6	28078792	28081130	-	686	antisense	uncharacterized LOC102724889 [Source:NCBI gene;Acc:102724889]	-	41	86	2.51813	5.70508
ENSG00000176153	2.46233	5.51107	0.0270427	0.418021	GPX2	14	64939152	64942905	-	1499	protein_coding	glutathione peroxidase 2 [Source:HGNC Symbol;Acc:HGNC:4554]	-	12	2	0.337285	0.0607178
ENSG00000135636	-2.56257	5.90758	0.0270427	0.418021	DYSF	2	71453722	71686768	+	8386	protein_coding	dysferlin [Source:HGNC Symbol;Acc:HGNC:3097]	-	2	12	0.0100483	0.06512
ENSG00000270504	-2.56257	5.90758	0.0270427	0.418021	AL391422.4	6	3751111	3753871	+	2761	antisense	novel transcript, antisense to PXDC1	-	2	12	0.0305198	0.197789
ENSG00000215022	-2.56257	5.90758	0.0270427	0.418021	AL008729.1	6	13264861	13295586	-	3115	antisense	uncharacterized LOC100130357 [Source:NCBI gene;Acc:100130357]	-	2	12	0.0270514	0.175312
ENSG00000115361	-2.56257	5.90758	0.0270427	0.418021	ACADL	2	210187939	210225491	-	4383	protein_coding	acyl-CoA dehydrogenase long chain [Source:HGNC Symbol;Acc:HGNC:88]	-	2	12	0.0192254	0.124594
ENSG00000242808	-2.56257	5.90758	0.0270427	0.418021	SOX2-OT	3	180989762	181836880	+	31629	sense_overlapping	SOX2 overlapping transcript [Source:HGNC Symbol;Acc:HGNC:20209]	-	2	12	0.00266417	0.0172657
ENSG00000171722	-2.56257	5.90758	0.0270427	0.418021	SPATA46	1	162373203	162376870	-	1864	protein_coding	spermatogenesis associated 46 [Source:HGNC Symbol;Acc:HGNC:27648]	-	2	12	0.0452066	0.29297
ENSG00000273284	-2.56257	5.90758	0.0270427	0.418021	AP001033.2	18	9259388	9260390	+	1003	sense_intronic	novel transcript, sense intronic to ANKRD12	-	2	12	0.0840131	0.544463
ENSG00000244701	-2.56257	5.90758	0.0270427	0.418021	AC004918.1	7	141652381	141656810	-	770	antisense	novel transcript, antisense to AGK	-	2	12	0.109435	0.709216
ENSG00000183562	-2.56257	5.90758	0.0270427	0.418021	AC131971.1	11	2989863	2991344	+	1482	antisense	novel transcript, antisense to NAP1L4	-	2	12	0.0568591	0.368486
ENSG00000279923	-2.56257	5.90758	0.0270427	0.418021	AC022417.1	5	31558573	31559875	+	1303	TEC	tec	-	2	12	0.0646701	0.419107
ENSG00000243978	2.46233	5.51107	0.0270427	0.418021	RTL9	X	110358816	110456334	+	5529	protein_coding	retrotransposon Gag like 9 [Source:HGNC Symbol;Acc:HGNC:29245]	-	12	2	0.0914434	0.0164616
ENSG00000154898	-2.56257	5.90758	0.0270427	0.418021	CCDC144CP	17	20321164	20403557	+	8145	transcribed_processed_pseudogene	coiled-coil domain containing 144C, pseudogene [Source:HGNC Symbol;Acc:HGNC:29073]	-	2	12	0.0103456	0.0670468
ENSG00000262248	-2.56257	5.90758	0.0270427	0.418021	AC027796.2	17	3619256	3619913	-	344	processed_pseudogene	pterin-4 alpha-carbinolamine dehydratase/dimerization cofactor of hepatocyte nuclear factor pseudogene	-	2	12	0.244957	1.58749
ENSG00000267114	-2.56257	5.90758	0.0270427	0.418021	AC011481.1	19	44950044	44954007	-	361	lincRNA	novel transcript	-	2	12	0.233421	1.51273
ENSG00000165828	-2.56257	5.90758	0.0270427	0.418021	PRAP1	10	133347146	133352683	+	971	protein_coding	proline rich acidic protein 1 [Source:HGNC Symbol;Acc:HGNC:23304]	-	2	12	0.0867818	0.562406
ENSG00000177363	2.46233	5.51107	0.0270427	0.418021	LRRN4CL	11	62686402	62689899	-	2585	protein_coding	LRRN4 C-terminal like [Source:HGNC Symbol;Acc:HGNC:33724]	-	12	2	0.195586	0.0352093
ENSG00000279022	-2.56257	5.90758	0.0270427	0.418021	AL359715.4	6	80440730	80441172	+	443	TEC	TEC	-	2	12	0.190215	1.23272
ENSG00000278200	2.46233	5.51107	0.0270427	0.418021	LINC01971	17	81480523	81481570	-	1048	lincRNA	long intergenic non-protein coding RNA 1971 [Source:HGNC Symbol;Acc:HGNC:52797]	-	12	2	0.482434	0.0868473
ENSG00000205549	2.46233	5.51107	0.0270427	0.418021	C9orf92	9	16203935	16410990	-	627	protein_coding	chromosome 9 open reading frame 92 [Source:HGNC Symbol;Acc:HGNC:19054]	-	12	2	0.806365	0.145161
ENSG00000207342	-2.56257	5.90758	0.0270427	0.418021	RF00019	14	88840165	88840263	+	99	misc_RNA		-	2	12	0.851163	5.51612
ENSG00000171121	-1.1677	2.24654	0.0270451	0.418021	KCNMB3	3	179236691	179267002	-	8979	protein_coding	potassium calcium-activated channel subfamily M regulatory beta subunit 3 [Source:HGNC Symbol;Acc:HGNC:6287]	-	29	63	0.136078	0.319301
ENSG00000267355	-1.1233	2.17845	0.0275504	0.424289	RPL9P29	17	78845953	78846868	-	593	processed_pseudogene	ribosomal protein L9 pseudogene 29 [Source:HGNC Symbol;Acc:HGNC:35533]	-	38	80	2.69989	6.13936
ENSG00000229388	-1.18042	2.26643	0.0278877	0.428193	LINC01715	1	28643228	28648581	+	978	lincRNA	long intergenic non-protein coding RNA 1715 [Source:HGNC Symbol;Acc:HGNC:52502]	-	26	57	1.12009	2.65231
ENSG00000249565	1.03823	2.05371	0.0281757	0.432094	SERBP1P5	4	78180866	78182046	-	1181	processed_pseudogene	SERPINE1 mRNA binding protein 1 pseudogene 5 [Source:HGNC Symbol;Acc:HGNC:44632]	-	130	61	4.63779	2.35054
ENSG00000226002	-1.2439	2.36837	0.0281925	0.432094	GTF2IP14	7	65084103	65100232	+	586	unprocessed_pseudogene	general transcription factor IIi pseudogene 14 [Source:HGNC Symbol;Acc:HGNC:51726]	-	24	55	1.72557	4.27123
ENSG00000173991	-1.12924	2.18743	0.0283755	0.434636	TCAP	17	39664187	39666555	+	2123	protein_coding	titin-cap [Source:HGNC Symbol;Acc:HGNC:11610]	-	35	74	0.694602	1.58624
ENSG00000231663	-1.06365	2.09022	0.0284598	0.435286	AL355472.1	1	234372807	234373593	-	575	antisense	uncharacterized LOC101927765 [Source:NCBI gene;Acc:101927765]	-	53	107	3.88352	8.46844
ENSG00000247134	-1.08213	2.11716	0.0284861	0.435286	AC090204.1	8	32996178	33044855	+	765	lincRNA	novel transcript	-	44	90	2.42331	5.35388
ENSG00000278383	-1.08213	2.11716	0.0284861	0.435286	AL031673.1	20	25680781	25681246	+	466	antisense	novel transcript, antisense to ZNF337	-	44	90	3.97818	8.7891
ENSG00000282870	-1.05033	2.071	0.0288173	0.439655	FRG1DP	20	29080390	29102761	+	771	unprocessed_pseudogene	FSHD region gene 1 family member D, pseudogene [Source:HGNC Symbol;Acc:HGNC:51763]	-	60	120	3.2788	7.08296
ENSG00000124006	-1.26005	2.39505	0.0288409	0.439655	OBSL1	2	219550729	219571859	-	9611	protein_coding	obscurin like 1 [Source:HGNC Symbol;Acc:HGNC:29092]	-	22	51	0.0964433	0.241485
ENSG00000274290	-1.13378	2.19432	0.028989	0.441386	HIST1H2BE	6	26172059	26184655	+	2585	protein_coding	histone cluster 1 H2B family member e [Source:HGNC Symbol;Acc:HGNC:4753]	-	33	70	0.537862	1.23232
ENSG00000104870	-1.2692	2.41028	0.0291851	0.443578	FCGRT	19	49506816	49526333	+	4173	protein_coding	Fc fragment of IgG receptor and transporter [Source:HGNC Symbol;Acc:HGNC:3621]	-	21	49	0.212026	0.534362
ENSG00000026652	1.22338	2.33494	0.0291851	0.443578	AGPAT4	6	161129979	161274061	-	8769	protein_coding	1-acylglycerol-3-phosphate O-acyltransferase 4 [Source:HGNC Symbol;Acc:HGNC:20885]	-	51	21	0.245041	0.108983
ENSG00000250067	-1.05028	2.07093	0.0292823	0.444791	YJEFN3	19	19528861	19537581	+	2959	protein_coding	YjeF N-terminal domain containing 3 [Source:HGNC Symbol;Acc:HGNC:24785]	-	58	116	0.825849	1.78402
ENSG00000152402	1.1032	2.14831	0.0293329	0.445295	GUCY1A2	11	106674012	107018524	-	16361	protein_coding	guanylate cyclase 1 soluble subunit alpha 2 [Source:HGNC Symbol;Acc:HGNC:4684]	-	87	39	0.224041	0.108478
ENSG00000144645	1.07802	2.11113	0.0294775	0.447225	OSBPL10	3	31657890	32077580	-	11976	protein_coding	oxysterol binding protein like 10 [Source:HGNC Symbol;Acc:HGNC:16395]	-	103	47	0.362363	0.178597
ENSG00000160282	-1.27919	2.42702	0.0295429	0.447419	FTCD	21	46136262	46155567	-	3311	protein_coding	formimidoyltransferase cyclodeaminase [Source:HGNC Symbol;Acc:HGNC:3974]	-	20	47	0.254501	0.645991
ENSG00000283141	-1.27919	2.42702	0.0295429	0.447419	AL157832.3	10	129784983	129806971	+	1005	lincRNA	novel transcript	-	20	47	0.838459	2.12823
ENSG00000164946	-1.10257	2.14737	0.0296398	0.448149	FREM1	9	14734666	14910995	-	10762	protein_coding	FRAS1 related extracellular matrix 1 [Source:HGNC Symbol;Acc:HGNC:23399]	-	40	83	0.156598	0.350972
ENSG00000059915	-1.13888	2.2021	0.0296613	0.448149	PSD	10	102402617	102421539	-	6338	protein_coding	pleckstrin and Sec7 domain containing [Source:HGNC Symbol;Acc:HGNC:9507]	-	31	66	0.206076	0.473892
ENSG00000224975	-1.13888	2.2021	0.0296613	0.448149	INE1	X	47204921	47205865	+	945	sense_intronic	inactivation escape 1 [Source:HGNC Symbol;Acc:HGNC:6060]	-	31	66	1.38213	3.17834
ENSG00000176293	-1.13888	2.2021	0.0296613	0.448149	ZNF135	19	58059239	58086310	+	6418	protein_coding	zinc finger protein 135 [Source:HGNC Symbol;Acc:HGNC:12919]	zf-C2H2	31	66	0.203507	0.467985
ENSG00000227582	-1.29014	2.44551	0.0299142	0.450292	ADGRF5P1	9	62860873	62864957	-	1489	transcribed_processed_pseudogene	adhesion G protein-coupled receptor F5 pseudogene 1 [Source:HGNC Symbol;Acc:HGNC:32922]	-	19	45	0.537622	1.37533
ENSG00000154856	1.02838	2.03973	0.0302437	0.450292	APCDD1	18	10454628	10489948	+	5943	protein_coding	APC down-regulated 1 [Source:HGNC Symbol;Acc:HGNC:15718]	-	127	60	0.900359	0.459445
ENSG00000280063	-1.03871	2.05439	0.0302437	0.450292	AC012676.5	16	4346694	4348648	-	1955	TEC	tec	-	62	123	1.33617	2.86316
ENSG00000105976	1.11537	2.1665	0.0302957	0.450292	MET	7	116672390	116798386	+	7039	protein_coding	MET proto-oncogene, receptor tyrosine kinase [Source:HGNC Symbol;Acc:HGNC:7029]	-	81	36	0.484833	0.232744
ENSG00000266729	-1.3022	2.46605	0.0302988	0.450292	DSG1-AS1	18	31343368	31426988	-	1149	antisense	DSG1 antisense RNA 1 [Source:HGNC Symbol;Acc:HGNC:51115]	-	18	43	0.66004	1.70308
ENSG00000224790	-1.3022	2.46605	0.0302988	0.450292	AP000704.1	21	36966492	36975164	+	2266	lincRNA	novel transcript	-	18	43	0.334681	0.863567
ENSG00000113389	1.05324	2.07519	0.0303163	0.450292	NPR3	5	32689070	32791724	+	9866	protein_coding	natriuretic peptide receptor 3 [Source:HGNC Symbol;Acc:HGNC:7945]	-	112	52	0.478294	0.239856
ENSG00000161082	2.12568	4.36409	0.0303481	0.450292	CELF5	19	3224703	3297076	+	6024	protein_coding	CUGBP Elav-like family member 5 [Source:HGNC Symbol;Acc:HGNC:14058]	-	14	3	0.0979176	0.0226633
ENSG00000173175	2.12568	4.36409	0.0303481	0.450292	ADCY5	3	123282296	123449758	-	8873	protein_coding	adenylate cyclase 5 [Source:HGNC Symbol;Acc:HGNC:236]	-	14	3	0.0664776	0.0153865
ENSG00000175773	-2.22697	4.68149	0.0303481	0.450292	AP002986.1	11	130314993	130403657	+	2628	lincRNA	uncharacterized LOC646383 [Source:NCBI gene;Acc:646383]	-	3	14	0.0480965	0.242432
ENSG00000230897	-2.22697	4.68149	0.0303481	0.450292	RPS18P12	17	14705076	14705534	-	459	processed_pseudogene	ribosomal protein S18 pseudogene 12 [Source:HGNC Symbol;Acc:HGNC:35967]	-	3	14	0.275376	1.38804
ENSG00000162267	-2.22697	4.68149	0.0303481	0.450292	ITIH3	3	52794768	52809009	+	5921	protein_coding	inter-alpha-trypsin inhibitor heavy chain 3 [Source:HGNC Symbol;Acc:HGNC:6168]	-	3	14	0.0213474	0.107602
ENSG00000265474	-2.22697	4.68149	0.0303481	0.450292	AC010761.4	17	28745569	28747652	-	521	antisense	novel transcript, antisense to TRAF4	-	3	14	0.242606	1.22286
ENSG00000057468	-2.22697	4.68149	0.0303481	0.450292	MSH4	1	75796882	75913238	+	3266	protein_coding	mutS homolog 4 [Source:HGNC Symbol;Acc:HGNC:7327]	-	3	14	0.0387011	0.195074
ENSG00000273064	-2.22697	4.68149	0.0303481	0.450292	AC017083.1	2	68252870	68253848	+	979	antisense	novel transcript	-	3	14	0.129109	0.650778
ENSG00000238151	-2.22697	4.68149	0.0303481	0.450292	MLLT10P1	20	30403123	30403384	-	262	processed_pseudogene	myeloid/lymphoid or mixed-lineage leukemia; translocated to, 10 pseudogene 1 [Source:HGNC Symbol;Acc:HGNC:15794]	-	3	14	0.482434	2.43172
ENSG00000274363	-2.22697	4.68149	0.0303481	0.450292	AC087742.1	17	4267691	4268430	+	740	lincRNA	novel transcript	-	3	14	0.170808	0.860962
ENSG00000257509	-2.22697	4.68149	0.0303481	0.450292	AC073487.1	12	55761550	55762628	-	529	sense_intronic	novel transcript, sense intronic to SARNP	-	3	14	0.238937	1.20437
ENSG00000276216	-2.22697	4.68149	0.0303481	0.450292	AC245014.3	1	145281116	145281462	+	347	lincRNA	novel transcript	-	3	14	0.364258	1.83606
ENSG00000199332	-2.22697	4.68149	0.0303481	0.450292	RF00019	6	31402152	31402250	-	99	misc_RNA		-	3	14	1.27674	6.43547
ENSG00000196747	-1.06543	2.09279	0.0303512	0.450292	HIST1H2AI	6	27808199	27808701	+	503	protein_coding	histone cluster 1 H2A family member i [Source:HGNC Symbol;Acc:HGNC:4725]	-	46	93	3.85308	8.414
ENSG00000233527	-1.06543	2.09279	0.0303512	0.450292	ZNF529-AS1	19	36573070	36594708	+	1868	antisense	ZNF529 antisense RNA 1 [Source:HGNC Symbol;Acc:HGNC:51275]	-	46	93	1.03753	2.26566
ENSG00000270580	-1.14466	2.21095	0.0304005	0.45052	PKD1P6-NPIPP1	16	15104723	15131601	-	3043	processed_transcript	PKD1P6-NPIPP1 readthrough [Source:NCBI gene;Acc:105369154]	-	29	62	0.401526	0.927209
ENSG00000266885	1.29908	2.46073	0.0311037	0.458232	AC132825.4	17	22435390	22439033	+	3644	transcribed_processed_pseudogene	chromosome 17 open reading frame 51 (C17orf51) pseudogene	-	41	16	0.474049	0.199816
ENSG00000180481	-1.33042	2.51476	0.0311037	0.458232	GLIPR1L2	12	75391070	75432688	+	3790	protein_coding	GLIPR1 like 2 [Source:HGNC Symbol;Acc:HGNC:28592]	-	16	39	0.177868	0.468288
ENSG00000264304	-1.33042	2.51476	0.0311037	0.458232	AC024267.3	17	28892469	28893342	+	562	antisense	novel transcript, antisense to FLOT2	-	16	39	1.1995	3.15803
ENSG00000188277	-1.05005	2.0706	0.0311985	0.458884	C15orf62	15	40770080	40772449	+	2370	protein_coding	chromosome 15 open reading frame 62 [Source:HGNC Symbol;Acc:HGNC:34489]	-	51	102	0.90665	1.95857
ENSG00000227533	-1.34707	2.54394	0.0315204	0.462553	SLC2A1-AS1	1	42959049	42983358	+	3364	lincRNA	SLC2A1 antisense RNA 1 [Source:HGNC Symbol;Acc:HGNC:44187]	-	15	37	0.187868	0.500534
ENSG00000267417	-1.34707	2.54394	0.0315204	0.462553	AC138474.1	19	13013662	13014511	-	523	antisense	novel transcript, antisense to NFIX	-	15	37	1.20839	3.21949
ENSG00000222009	-1.21124	2.31537	0.0316557	0.463738	BTBD19	1	44808482	44815585	+	3520	protein_coding	BTB domain containing 19 [Source:HGNC Symbol;Acc:HGNC:27145]	-	25	56	0.299237	0.723991
ENSG00000272668	-1.21124	2.31537	0.0316557	0.463738	AL590560.1	1	159854870	159867685	+	7134	antisense	uncharacterized LOC107985216 [Source:NCBI gene;Acc:107985216]	-	25	56	0.147647	0.357226
ENSG00000232611	-1.04998	2.0705	0.0318467	0.465761	AL683813.1	X	136840931	136847797	-	3018	lincRNA	novel transcript	-	49	98	0.684061	1.47773
ENSG00000099958	-1.36584	2.57726	0.0319423	0.465761	DERL3	22	23834503	23839128	-	3796	protein_coding	derlin 3 [Source:HGNC Symbol;Acc:HGNC:14236]	-	14	35	0.155389	0.419594
ENSG00000163817	-1.36584	2.57726	0.0319423	0.465761	SLC6A20	3	45755450	45796535	-	6651	protein_coding	solute carrier family 6 member 20 [Source:HGNC Symbol;Acc:HGNC:30927]	-	14	35	0.0886868	0.23948
ENSG00000267414	-1.08431	2.12037	0.0320742	0.465761	AC120049.1	18	44676927	44679717	-	2065	lincRNA	uncharacterized LOC101927943 [Source:NCBI gene;Acc:101927943]	-	41	84	0.83653	1.85117
ENSG00000103888	-1.21748	2.32541	0.0321187	0.465761	CEMIP	15	80779343	80951776	+	7621	protein_coding	cell migration inducing hyaluronidase 1 [Source:HGNC Symbol;Acc:HGNC:29213]	-	24	54	0.132684	0.322455
ENSG00000271870	-1.21748	2.32541	0.0321187	0.465761	AC024060.1	3	3152942	3153435	+	494	antisense	novel transcript, antisense to CRBN	-	24	54	2.04693	4.97456
ENSG00000166669	-2.01776	4.04954	0.0322922	0.465761	ATF7IP2	16	10326434	10483638	+	6391	protein_coding	activating transcription factor 7 interacting protein 2 [Source:HGNC Symbol;Acc:HGNC:20397]	-	4	16	0.0263699	0.11393
ENSG00000077327	-2.01776	4.04954	0.0322922	0.465761	SPAG6	10	22345445	22454224	+	3887	protein_coding	sperm associated antigen 6 [Source:HGNC Symbol;Acc:HGNC:11215]	-	4	16	0.0433574	0.187324
ENSG00000178146	-2.01776	4.04954	0.0322922	0.465761	AL672207.1	X	101778969	101780538	-	1570	processed_pseudogene	glycerol kinase (GK) pseudogene	-	4	16	0.107344	0.463776
ENSG00000261819	1.91591	3.77352	0.0322922	0.465761	AC138932.3	16	14988259	14990160	-	1902	processed_pseudogene	uncharacterized protein KIAA2013 [Source:NCBI gene;Acc:102724984]	-	16	4	0.354427	0.0957056
ENSG00000229931	-2.01776	4.04954	0.0322922	0.465761	AL137003.1	6	16761138	16762652	+	698	antisense	uncharacterized LOC101928433 [Source:NCBI gene;Acc:101928433]	-	4	16	0.241447	1.04316
ENSG00000267980	1.91591	3.77352	0.0322922	0.465761	AC007292.1	19	4363789	4364640	+	746	antisense	novel transcript, antisense to SH3GL1	-	16	4	0.903647	0.244011
ENSG00000235065	-2.01776	4.04954	0.0322922	0.465761	RPL24P2	20	21114723	21115197	+	475	processed_pseudogene	ribosomal protein L24 pseudogene 2 [Source:HGNC Symbol;Acc:HGNC:16597]	-	4	16	0.354801	1.5329
ENSG00000235363	-2.01776	4.04954	0.0322922	0.465761	SNRPGP10	1	205351247	205351471	+	225	processed_pseudogene	small nuclear ribonucleoprotein polypeptide G pseudogene 10 [Source:HGNC Symbol;Acc:HGNC:39329]	-	4	16	0.749023	3.23612
ENSG00000269938	-2.01776	4.04954	0.0322922	0.465761	AC068790.2	12	123968023	123968579	-	557	sense_intronic	novel transcript, sense intronic to CCDC92	-	4	16	0.302568	1.30723
ENSG00000269376	1.91591	3.77352	0.0322922	0.465761	AL356740.3	13	113009671	113010319	+	649	sense_intronic	novel transcript	-	16	4	1.03871	0.280481
ENSG00000259845	-2.01776	4.04954	0.0322922	0.465761	HERC2P10	15	30815271	30844153	+	2393	unprocessed_pseudogene	hect domain and RLD 2 pseudogene 10 [Source:HGNC Symbol;Acc:HGNC:39056]	-	4	16	0.0704263	0.304274
ENSG00000137473	-2.01776	4.04954	0.0322922	0.465761	TTC29	4	146706638	146945882	-	3332	protein_coding	tetratricopeptide repeat domain 29 [Source:HGNC Symbol;Acc:HGNC:29936]	-	4	16	0.0505793	0.218526
ENSG00000239608	-2.01776	4.04954	0.0322922	0.465761	RUVBL1-AS1	3	128075810	128079056	+	588	antisense	RUVBL1 antisense RNA 1 [Source:HGNC Symbol;Acc:HGNC:40514]	-	4	16	0.286616	1.23831
ENSG00000281530	1.91591	3.77352	0.0322922	0.465761	AC004461.2	22	19061041	19061843	-	803	sense_intronic	DiGeorge syndrome critical region gene 12 (non-protein coding)	-	16	4	0.839503	0.22669
ENSG00000258303	-2.01776	4.04954	0.0322922	0.465761	AC012464.2	12	93836167	93838038	+	779	sense_intronic	novel transcript	-	4	16	0.216342	0.934696
ENSG00000136059	-1.38717	2.61565	0.0323643	0.465761	VILL	3	37988059	38007188	+	6476	protein_coding	villin like [Source:HGNC Symbol;Acc:HGNC:30906]	-	13	33	0.0845774	0.231897
ENSG00000227008	-1.38717	2.61565	0.0323643	0.465761	AL009174.1	X	133670971	133671386	+	416	processed_pseudogene	ribosomal protein S24 (RPS24) pseudogene	-	13	33	1.31664	3.61001
ENSG00000235159	-1.38717	2.61565	0.0323643	0.465761	AL121672.2	22	46067356	46069891	-	867	lincRNA	novel transcript	-	13	33	0.631745	1.73214
ENSG00000189127	-1.38717	2.61565	0.0323643	0.465761	ANKRD34B	5	80556755	80570488	-	4024	protein_coding	ankyrin repeat domain 34B [Source:HGNC Symbol;Acc:HGNC:33736]	-	13	33	0.136114	0.373202
ENSG00000214975	-1.08511	2.12154	0.032467	0.466262	PPIAP29	6	24976419	24976982	+	499	processed_pseudogene	peptidylprolyl isomerase A pseudogene 29 [Source:HGNC Symbol;Acc:HGNC:43021]	-	40	82	3.37736	7.47827
ENSG00000244560	-1.02653	2.03712	0.0325245	0.466562	AC004890.2	7	149285281	149297312	+	4288	transcribed_unprocessed_pseudogene	AI894139 pseudogene [Source:NCBI gene;Acc:155060]	-	61	120	0.599367	1.27354
ENSG00000134013	1.00199	2.00276	0.0330521	0.46685	LOXL2	8	23297189	23425328	-	5707	protein_coding	lysyl oxidase like 2 [Source:HGNC Symbol;Acc:HGNC:6666]	-	133	64	0.981887	0.51034
ENSG00000146021	-1.23155	2.3482	0.0331211	0.46685	KLHL3	5	137617500	137736090	-	11854	protein_coding	kelch like family member 3 [Source:HGNC Symbol;Acc:HGNC:6354]	-	22	50	0.0781944	0.191952
ENSG00000019505	-1.23155	2.3482	0.0331211	0.46685	SYT13	11	45240301	45286319	-	5424	protein_coding	synaptotagmin 13 [Source:HGNC Symbol;Acc:HGNC:14962]	-	22	50	0.170892	0.419506
ENSG00000237491	-1.0168	2.02343	0.0333561	0.46685	AL669831.5	1	778770	810060	+	5517	lincRNA	novel transcript	-	65	127	0.496396	1.04758
ENSG00000246523	-1.87346	3.66409	0.0333763	0.46685	AP001528.1	11	86955619	87000959	+	1393	lincRNA	uncharacterized LOC100506368 [Source:NCBI gene;Acc:100506368]	-	5	18	0.15123	0.588043
ENSG00000226314	-1.87346	3.66409	0.0333763	0.46685	ZNF192P1	6	28161769	28169594	+	2547	transcribed_unprocessed_pseudogene	zinc finger protein 192 pseudogene 1 [Source:HGNC Symbol;Acc:HGNC:18777]	-	5	18	0.0827102	0.321611
ENSG00000177483	-1.87346	3.66409	0.0333763	0.46685	RBM44	2	237798389	237842808	+	6049	protein_coding	RNA binding motif protein 44 [Source:HGNC Symbol;Acc:HGNC:24756]	-	5	18	0.0348261	0.135418
ENSG00000223820	-1.87346	3.66409	0.0333763	0.46685	CFL1P1	10	87817928	87845612	+	2695	transcribed_unprocessed_pseudogene	cofilin 1 pseudogene 1 [Source:HGNC Symbol;Acc:HGNC:28560]	-	5	18	0.078168	0.30395
ENSG00000229431	-1.87346	3.66409	0.0333763	0.46685	AL139289.1	1	43385113	43389155	+	731	antisense	novel transcript	-	5	18	0.288184	1.12058
ENSG00000225595	-1.87346	3.66409	0.0333763	0.46685	LINC01623	6	28859625	28864630	-	3098	lincRNA	long intergenic non-protein coding RNA 1623 [Source:HGNC Symbol;Acc:HGNC:52050]	-	5	18	0.0679996	0.264411
ENSG00000273374	-1.87346	3.66409	0.0333763	0.46685	AC069222.1	3	99802699	99806058	-	3360	lincRNA	novel transcript	-	5	18	0.0626973	0.243793
ENSG00000279345	-1.87346	3.66409	0.0333763	0.46685	Z98885.3	22	49805452	49807208	+	1757	antisense	novel transcript, antisense to BRD1	-	5	18	0.119899	0.466217
ENSG00000229816	-1.87346	3.66409	0.0333763	0.46685	DDX50P1	2	32201600	32203999	+	2400	processed_pseudogene	DEAD-box helicase 50 pseudogene 1 [Source:HGNC Symbol;Acc:HGNC:18974]	-	5	18	0.0877762	0.34131
ENSG00000251689	-1.87346	3.66409	0.0333763	0.46685	AC079140.5	4	269866	270175	-	310	processed_pseudogene	novel zinc finger protein pseudogene	-	5	18	0.679557	2.6424
ENSG00000258325	-1.87346	3.66409	0.0333763	0.46685	ITFG2-AS1	12	2796877	2812902	-	761	antisense	ITFG2 antisense RNA 1 [Source:HGNC Symbol;Acc:HGNC:53128]	-	5	18	0.276824	1.0764
ENSG00000257084	-1.87346	3.66409	0.0333763	0.46685	MIR200CHG	12	6963246	6964447	+	350	lincRNA	MIR200C and MIR141 host gene [Source:HGNC Symbol;Acc:HGNC:53161]	-	5	18	0.601894	2.34041
ENSG00000254399	-1.87346	3.66409	0.0333763	0.46685	GLYATL1P4	11	59042737	59050971	+	906	unprocessed_pseudogene	glycine-N-acyltransferase like 1 pseudogene 4 [Source:HGNC Symbol;Acc:HGNC:37864]	-	5	18	0.23252	0.904132
ENSG00000224066	-1.87346	3.66409	0.0333763	0.46685	AL049795.1	1	32204769	32206814	-	1357	antisense	novel transcript	-	5	18	0.155242	0.603643
ENSG00000203780	-1.52541	2.87868	0.0335331	0.46685	FANK1	10	125896539	126009592	+	3384	protein_coding	fibronectin type III and ankyrin repeat domains 1 [Source:HGNC Symbol;Acc:HGNC:23527]	-	10	28	0.124505	0.376544
ENSG00000265683	-1.52541	2.87868	0.0335331	0.46685	SYPL1P2	17	27351858	27352584	-	727	processed_pseudogene	synaptophysin like 1 pseudogene 2 [Source:HGNC Symbol;Acc:HGNC:53547]	-	10	28	0.57954	1.75272
ENSG00000279342	-1.52541	2.87868	0.0335331	0.46685	AP000866.6	11	124789240	124792818	-	3579	sense_intronic	novel transcript, sense intronic to MSANTD2	-	10	28	0.117722	0.356028
ENSG00000256591	-1.52541	2.87868	0.0335331	0.46685	AP003108.2	11	61429220	61485822	+	7522	protein_coding	novel transcript	-	10	28	0.0560124	0.1694
ENSG00000113073	-1.52541	2.87868	0.0335331	0.46685	SLC4A9	5	140360202	140375143	+	3635	protein_coding	solute carrier family 4 member 9 [Source:HGNC Symbol;Acc:HGNC:11035]	-	10	28	0.115908	0.350543
ENSG00000198555	-1.52541	2.87868	0.0335331	0.46685	AC133561.1	16	33976039	33987630	+	2415	unprocessed_pseudogene	solute carrier family 6 (neurotransmitter transporter, creatine), member 8 (SLC6A8) pseudogene	-	10	28	0.174462	0.527629
ENSG00000274602	-1.23953	2.36121	0.033664	0.46685	PI4KAP1	22	18533646	18577968	-	4812	transcribed_unprocessed_pseudogene	phosphatidylinositol 4-kinase alpha pseudogene 1 [Source:HGNC Symbol;Acc:HGNC:33576]	-	21	48	0.18387	0.453945
ENSG00000129194	1.19489	2.28927	0.033664	0.46685	SOX15	17	7588178	7590170	-	1541	protein_coding	SRY-box 15 [Source:HGNC Symbol;Acc:HGNC:11196]	HMG	50	21	1.36705	0.620161
ENSG00000272758	-1.01625	2.02265	0.0336706	0.46685	AC083798.2	3	122416207	122443180	+	2891	antisense	uncharacterized LOC102723582 [Source:NCBI gene;Acc:102723582]	-	64	125	0.932717	1.96766
ENSG00000232352	-1.04976	2.07018	0.0337237	0.46685	SEMA3B-AS1	3	50266641	50267371	-	338	antisense	SEMA3B antisense RNA 1 (head to head) [Source:HGNC Symbol;Acc:HGNC:49096]	-	44	88	5.48471	11.8482
ENSG00000163958	1.4661	2.76275	0.0338323	0.46685	ZDHHC19	3	196197449	196211437	-	2432	protein_coding	zinc finger DHHC-type containing 19 [Source:HGNC Symbol;Acc:HGNC:20713]	-	26	9	0.45043	0.16841
ENSG00000110076	-1.76743	3.40446	0.0339102	0.46685	NRXN2	11	64606174	64723188	-	10580	protein_coding	neurexin 2 [Source:HGNC Symbol;Acc:HGNC:8009]	-	6	20	0.0238937	0.0860265
ENSG00000223345	-1.76743	3.40446	0.0339102	0.46685	HIST2H2BA	1	121108210	121117257	-	756	transcribed_unprocessed_pseudogene	histone cluster 2 H2B family member a (pseudogene) [Source:HGNC Symbol;Acc:HGNC:20560]	-	6	20	0.334385	1.20392
ENSG00000275120	1.66499	3.17111	0.0339102	0.46685	AC048382.5	15	84597809	84633987	-	3667	antisense	novel transcript, antisense to ZSCAN2	-	20	6	0.229793	0.0744609
ENSG00000272588	-1.76743	3.40446	0.0339102	0.46685	AC139887.4	4	757022	757740	-	719	antisense	novel transcript, antisense to PCGF3	-	6	20	0.351593	1.26587
ENSG00000276663	-1.76743	3.40446	0.0339102	0.46685	AC009090.3	16	57245832	57246396	-	565	antisense	novel transcript, antisense to ARL2BP	-	6	20	0.447425	1.6109
ENSG00000280424	-1.76743	3.40446	0.0339102	0.46685	BX537318.2	22	46006616	46010777	+	4162	TEC	dynein heavy chain -like pseudogene [Source:NCBI gene;Acc:730668]	-	6	20	0.0607389	0.218683
ENSG00000105419	1.51871	2.86535	0.0340354	0.46685	MEIS3	19	47403124	47419523	-	5122	protein_coding	Meis homeobox 3 [Source:HGNC Symbol;Acc:HGNC:29537]	Homeobox	24	8	0.197419	0.0710785
ENSG00000251867	-1.62147	3.07688	0.0340354	0.46685	AC009812.1	8	80484561	80486699	-	1672	antisense	novel transcript, antisense to ZBTB10	-	8	24	0.201591	0.653225
ENSG00000253559	-1.62147	3.07688	0.0340354	0.46685	OSGEPL1-AS1	2	189762704	189765556	+	860	antisense	OSGEPL1 antisense RNA 1 [Source:HGNC Symbol;Acc:HGNC:41009]	-	8	24	0.391931	1.26999
ENSG00000187621	-1.62147	3.07688	0.0340354	0.46685	TCL6	14	95650498	95679833	+	10566	processed_transcript	T cell leukemia/lymphoma 6 [Source:HGNC Symbol;Acc:HGNC:13463]	-	8	24	0.0319005	0.103369
ENSG00000229447	-1.62147	3.07688	0.0340354	0.46685	AC114495.2	1	31263245	31263681	-	437	processed_pseudogene	general transcription factor IIA, 2, 12kDa (GTF2A2) pseudogene	-	8	24	0.771305	2.49929
ENSG00000265791	1.51871	2.86535	0.0340354	0.46685	AC127024.4	17	30781493	30782221	-	308	sense_intronic	novel transcript, sense intronic CRLF3	-	24	8	3.28306	1.18203
ENSG00000279114	-1.62147	3.07688	0.0340354	0.46685	Z99129.3	6	122471923	122484161	+	6430	TEC	TEC	-	8	24	0.05242	0.169859
ENSG00000101489	-1.68603	3.21769	0.0340884	0.46685	CELF4	18	37243047	37566037	-	6532	protein_coding	CUGBP Elav-like family member 4 [Source:HGNC Symbol;Acc:HGNC:14015]	-	7	22	0.0451512	0.153272
ENSG00000213889	-1.68603	3.21769	0.0340884	0.46685	PPM1N	19	45488777	45502510	+	2571	protein_coding	protein phosphatase, Mg2+/Mn2+ dependent 1N (putative) [Source:HGNC Symbol;Acc:HGNC:26845]	-	7	22	0.114713	0.389411
ENSG00000236015	-1.68603	3.21769	0.0340884	0.46685	AC011290.2	7	39569376	39570198	-	823	processed_pseudogene	thioredoxin domain containing 1 (TXNDC1) pseudogene	-	7	22	0.358357	1.2165
ENSG00000280327	1.58341	2.99676	0.0340884	0.46685	Z97633.1	16	1576716	1578371	-	1656	TEC	tec	-	22	7	0.559732	0.192365
ENSG00000274274	1.58341	2.99676	0.0340884	0.46685	GAGE13	X	49331616	49338952	+	530	protein_coding	G antigen 13 [Source:HGNC Symbol;Acc:HGNC:29081]	-	22	7	1.7489	0.601049
ENSG00000277449	-1.12125	2.17536	0.0341653	0.46685	CEBPB-AS1	20	50184598	50191498	-	2648	antisense	CEBPB antisense RNA 1 [Source:HGNC Symbol;Acc:HGNC:51226]	-	29	61	0.461422	1.04833
ENSG00000137878	1.20611	2.30715	0.0342372	0.46685	GCOM1	15	57591908	57714745	+	10302	protein_coding	GRINL1A complex locus 1 [Source:HGNC Symbol;Acc:HGNC:26424]	-	48	20	0.196308	0.0883479
ENSG00000271714	1.00645	2.00897	0.0346828	0.46685	AC010501.1	5	74865893	74867854	+	1962	antisense	uncharacterized LOC441086 [Source:NCBI gene;Acc:441086]	-	123	59	2.64134	1.36849
ENSG00000269743	-1.12366	2.17899	0.0347185	0.46685	SLC25A53	X	104099214	104157027	-	6845	protein_coding	solute carrier family 25 member 53 [Source:HGNC Symbol;Acc:HGNC:31894]	-	28	59	0.172346	0.392253
ENSG00000139537	-1.12366	2.17899	0.0347185	0.46685	CCDC65	12	48904110	48931840	+	2373	protein_coding	coiled-coil domain containing 65 [Source:HGNC Symbol;Acc:HGNC:29937]	-	28	59	0.497139	1.13147
ENSG00000241769	-1.12366	2.17899	0.0347185	0.46685	LINC00893	X	149527591	149540959	-	3604	antisense	long intergenic non-protein coding RNA 893 [Source:HGNC Symbol;Acc:HGNC:44265]	-	28	59	0.327334	0.744998
ENSG00000277715	-1.08978	2.12841	0.0347397	0.46685	AC079174.2	12	106250759	106252786	+	2028	antisense	novel transcript, antisense to CKAP4	-	35	72	0.72714	1.61567
ENSG00000269416	-1.25781	2.39132	0.0348426	0.46685	LINC01224	19	23399233	23416075	-	3296	lincRNA	long intergenic non-protein coding RNA 1224 [Source:HGNC Symbol;Acc:HGNC:49676]	-	19	44	0.242876	0.60751
ENSG00000224843	-1.25781	2.39132	0.0348426	0.46685	LINC00240	6	26956992	27023924	+	6481	lincRNA	long intergenic non-protein coding RNA 240 [Source:HGNC Symbol;Acc:HGNC:18772]	-	19	44	0.123518	0.308957
ENSG00000200534	-1.25781	2.39132	0.0348426	0.46685	SNORA33	6	132817219	132817348	+	130	snoRNA	small nucleolar RNA, H/ACA box 33 [Source:HGNC Symbol;Acc:HGNC:32623]	-	19	44	6.15784	15.4027
ENSG00000196542	2.97123	7.84205	0.0348666	0.46685	SPTSSB	3	161344792	161372880	-	3745	protein_coding	serine palmitoyltransferase small subunit B [Source:HGNC Symbol;Acc:HGNC:24045]	-	9	1	0.101253	0.0121517
ENSG00000075651	2.97123	7.84205	0.0348666	0.46685	PLD1	3	171600405	171810950	-	12859	protein_coding	phospholipase D1 [Source:HGNC Symbol;Acc:HGNC:9067]	-	9	1	0.0294885	0.003539
ENSG00000080618	-3.06857	8.38944	0.0348666	0.46685	CPB2	13	46053195	46105033	-	1715	protein_coding	carboxypeptidase B2 [Source:HGNC Symbol;Acc:HGNC:2300]	-	1	9	0.0245671	0.238817
ENSG00000118473	-3.06857	8.38944	0.0348666	0.46685	SGIP1	1	66533383	66748299	+	10477	protein_coding	SH3 domain GRB2 like endophilin interacting protein 1 [Source:HGNC Symbol;Acc:HGNC:25412]	-	1	9	0.00402143	0.0390925
ENSG00000134198	-3.06857	8.38944	0.0348666	0.46685	TSPAN2	1	115048011	115089500	-	3410	protein_coding	tetraspanin 2 [Source:HGNC Symbol;Acc:HGNC:20659]	-	1	9	0.0123556	0.120109
ENSG00000129654	-3.06857	8.38944	0.0348666	0.46685	FOXJ1	17	76136333	76141299	-	2641	protein_coding	forkhead box J1 [Source:HGNC Symbol;Acc:HGNC:3816]	Fork	1	9	0.0159533	0.155082
ENSG00000277561	2.97123	7.84205	0.0348666	0.46685	GOLGA8IP	15	22606022	22617854	-	4116	transcribed_unprocessed_pseudogene	golgin A8 family member I, pseudogene [Source:HGNC Symbol;Acc:HGNC:26660]	-	9	1	0.0921266	0.0110564
ENSG00000250986	-3.06857	8.38944	0.0348666	0.46685	LINC02600	4	3758748	3763390	-	4525	lincRNA	long intergenic non-protein coding RNA 2600 [Source:HGNC Symbol;Acc:HGNC:53177]	-	1	9	0.00931106	0.0905131
ENSG00000187627	-3.06857	8.38944	0.0348666	0.46685	RGPD1	2	86907953	87013976	+	7166	protein_coding	RANBP2-like and GRIP domain containing 1 [Source:HGNC Symbol;Acc:HGNC:32414]	-	1	9	0.00587951	0.0571549
ENSG00000148680	2.97123	7.84205	0.0348666	0.46685	HTR7	10	90740823	90857698	-	3131	protein_coding	5-hydroxytryptamine receptor 7 [Source:HGNC Symbol;Acc:HGNC:5302]	-	9	1	0.121109	0.0145347
ENSG00000100399	2.97123	7.84205	0.0348666	0.46685	CHADL	22	41229510	41240934	-	2599	protein_coding	chondroadherin like [Source:HGNC Symbol;Acc:HGNC:25165]	-	9	1	0.1459	0.0175098
ENSG00000278948	-3.06857	8.38944	0.0348666	0.46685	AL031587.5	22	37943050	37944898	+	1849	TEC	TEC	-	1	9	0.0227867	0.22151
ENSG00000186051	2.97123	7.84205	0.0348666	0.46685	TAL2	9	105662457	105663112	+	656	protein_coding	TAL bHLH transcription factor 2 [Source:HGNC Symbol;Acc:HGNC:11557]	bHLH	9	1	0.578038	0.0693719
ENSG00000245322	-3.06857	8.38944	0.0348666	0.46685	AC097460.1	4	99950006	100195099	+	1714	antisense	uncharacterized LOC256880 [Source:NCBI gene;Acc:256880]	-	1	9	0.0245814	0.238957
ENSG00000258017	-3.06857	8.38944	0.0348666	0.46685	AC011603.2	12	49127782	49147869	+	1632	antisense	novel transcript, antisense to TUBA1B	-	1	9	0.0258165	0.250963
ENSG00000268536	-3.06857	8.38944	0.0348666	0.46685	AC005523.1	19	4785120	4791207	-	418	lincRNA	novel transcript	-	1	9	0.100796	0.979837
ENSG00000274929	2.97123	7.84205	0.0348666	0.46685	AL157813.1	13	48532013	48532599	-	587	sense_intronic	novel transcript, sense intronic to RCBTB2	-	9	1	0.645985	0.0775264
ENSG00000255753	-3.06857	8.38944	0.0348666	0.46685	AC009533.2	12	9314402	9316173	-	586	processed_pseudogene	WAS protein family homolog pseudogene	-	1	9	0.0718986	0.698928
ENSG00000202399	-3.06857	8.38944	0.0348666	0.46685	RF00019	8	97772313	97772425	+	113	misc_RNA		-	1	9	0.372855	3.62453
ENSG00000249249	2.97123	7.84205	0.0348666	0.46685	AC010226.1	5	115602057	115620659	+	1218	antisense	uncharacterized LOC101927100 [Source:NCBI gene;Acc:101927100]	-	9	1	0.311324	0.0373629
ENSG00000285897	2.97123	7.84205	0.0348666	0.46685	AC004687.2	17	58345206	58417595	-	5828	protein_coding	novel transcript	-	9	1	0.065064	0.00780851
ENSG00000182508	-3.06857	8.38944	0.0348666	0.46685	LHFPL1	X	112630648	112680054	-	1750	protein_coding	LHFPL tetraspan subfamily member 1 [Source:HGNC Symbol;Acc:HGNC:6587]	-	1	9	0.0240757	0.234041
ENSG00000274569	2.97123	7.84205	0.0348666	0.46685	AC024884.1	12	56413647	56414045	-	399	processed_pseudogene	apolipoprotein F (APOF) pseudogene	-	9	1	0.950358	0.114055
ENSG00000268945	2.97123	7.84205	0.0348666	0.46685	AC010422.2	19	12682693	12687279	-	635	lincRNA	novel transcript	-	9	1	0.597154	0.0716661
ENSG00000224090	-3.06857	8.38944	0.0348666	0.46685	AC097468.1	2	219002215	219015721	+	1992	antisense	uncharacterized LOC100129175 [Source:NCBI gene;Acc:100129175]	-	1	9	0.0211509	0.205608
ENSG00000250413	-3.06857	8.38944	0.0348666	0.46685	AC005674.1	4	10006482	10009725	+	459	antisense	novel transcript, antisense to SLC2A9	-	1	9	0.0917921	0.892314
ENSG00000256843	-3.06857	8.38944	0.0348666	0.46685	AC023157.2	12	31748100	31748240	-	141	processed_pseudogene	dpy-30 homolog (C. elegans) (DPY30) pseudogene	-	1	9	0.298812	2.90477
ENSG00000145626	2.97123	7.84205	0.0348666	0.46685	UGT3A1	5	35951010	36001028	-	8485	protein_coding	UDP glycosyltransferase family 3 member A1 [Source:HGNC Symbol;Acc:HGNC:26625]	-	9	1	0.0446898	0.00536335
ENSG00000241923	-3.06857	8.38944	0.0348666	0.46685	RPL14P3	4	140366240	140366861	-	622	processed_pseudogene	ribosomal protein L14 pseudogene 3 [Source:HGNC Symbol;Acc:HGNC:36638]	-	1	9	0.0677372	0.658476
ENSG00000224401	-3.06857	8.38944	0.0348666	0.46685	RPL7P57	X	47840963	47841702	-	740	processed_pseudogene	ribosomal protein L7 pseudogene 57 [Source:HGNC Symbol;Acc:HGNC:35901]	-	1	9	0.0569359	0.553476
ENSG00000187024	-3.06857	8.38944	0.0348666	0.46685	PTRH1	9	127690348	127724873	-	4072	protein_coding	peptidyl-tRNA hydrolase 1 homolog [Source:HGNC Symbol;Acc:HGNC:27039]	-	1	9	0.0103469	0.100583
ENSG00000106113	-3.06857	8.38944	0.0348666	0.46685	CRHR2	7	30651943	30700129	-	3984	protein_coding	corticotropin releasing hormone receptor 2 [Source:HGNC Symbol;Acc:HGNC:2358]	-	1	9	0.0105754	0.102804
ENSG00000180846	-3.06857	8.38944	0.0348666	0.46685	CSNK1G2-AS1	19	1952531	1954586	-	1346	antisense	CSNK1G2 antisense RNA 1 [Source:HGNC Symbol;Acc:HGNC:28604]	-	1	9	0.0313021	0.304288
ENSG00000198092	-3.06857	8.38944	0.0348666	0.46685	TMPRSS11F	4	68053198	68129880	-	2088	protein_coding	transmembrane serine protease 11F [Source:HGNC Symbol;Acc:HGNC:29994]	-	1	9	0.0201784	0.196155
ENSG00000200769	-3.06857	8.38944	0.0348666	0.46685	RF00019	7	92202243	92202334	-	92	misc_RNA		-	1	9	0.457963	4.45187
ENSG00000258545	-3.06857	8.38944	0.0348666	0.46685	RHOXF1-AS1	X	120036236	120146854	+	2495	antisense	RHOXF1 antisense RNA 1 [Source:HGNC Symbol;Acc:HGNC:51582]	-	1	9	0.0168868	0.164157
ENSG00000261812	2.97123	7.84205	0.0348666	0.46685	TUBB8P7	16	90093154	90096354	+	2466	transcribed_unprocessed_pseudogene	tubulin beta 8 class VIII pseudogene 7 [Source:HGNC Symbol;Acc:HGNC:42345]	-	9	1	0.153768	0.0184542
ENSG00000279404	2.97123	7.84205	0.0348666	0.46685	AC008739.5	19	20926777	20928714	-	1938	TEC	TEC	-	9	1	0.195662	0.0234819
ENSG00000260249	-3.06857	8.38944	0.0348666	0.46685	AC007608.3	16	50666211	50671639	+	5275	antisense	uncharacterized LOC101927272 [Source:NCBI gene;Acc:101927272]	-	1	9	0.00798722	0.077644
ENSG00000162040	2.97123	7.84205	0.0348666	0.46685	HS3ST6	16	1911463	1918440	-	1273	protein_coding	heparan sulfate-glucosamine 3-sulfotransferase 6 [Source:HGNC Symbol;Acc:HGNC:14178]	-	9	1	0.297874	0.0357486
ENSG00000180610	-3.06857	8.38944	0.0348666	0.46685	ZBTB12BP	4	39770081	39771371	-	1122	processed_pseudogene	zinc finger and BTB domain containing 12B, pseudogene [Source:HGNC Symbol;Acc:HGNC:37702]	-	1	9	0.0375513	0.365037
ENSG00000270171	-3.06857	8.38944	0.0348666	0.46685	AL359881.3	1	7693124	7694844	-	1721	lincRNA	novel transcript	-	1	9	0.0244814	0.237985
ENSG00000207062	-3.06857	8.38944	0.0348666	0.46685	SNORA15B-1	7	65070538	65070672	+	135	snoRNA	small nucleolar RNA, H/ACA box 15B-1 [Source:HGNC Symbol;Acc:HGNC:52191]	-	1	9	0.312093	3.03387
ENSG00000263924	-3.06857	8.38944	0.0348666	0.46685	AC022960.1	18	31844388	31845178	+	348	antisense	novel transcript, antisense to KIAA1012	-	1	9	0.121071	1.17693
ENSG00000264812	-3.06857	8.38944	0.0348666	0.46685	AC132938.2	17	82400703	82401382	-	680	sense_intronic	novel transcript, sense intronic C17orf101	-	1	9	0.0619596	0.602312
ENSG00000273445	-3.06857	8.38944	0.0348666	0.46685	AC133644.2	2	87477495	87478034	-	540	antisense	novel transcript	-	1	9	0.0780233	0.758467
ENSG00000228728	-3.06857	8.38944	0.0348666	0.46685	PPIAP91	X	150818753	150819246	+	494	processed_pseudogene	peptidylprolyl isomerase A pseudogene 91 [Source:HGNC Symbol;Acc:HGNC:53715]	-	1	9	0.0852886	0.829093
ENSG00000273336	2.97123	7.84205	0.0348666	0.46685	OR7M1P	10	133481238	133481770	+	533	unprocessed_pseudogene	olfactory receptor family 7 subfamily M member 1 pseudogene [Source:HGNC Symbol;Acc:HGNC:15128]	-	9	1	0.711432	0.0853809
ENSG00000262920	-3.06857	8.38944	0.0348666	0.46685	AC129507.4	17	321392	322453	+	432	antisense	novel transcript, antisense to RPH3AL	-	1	9	0.0975291	0.948083
ENSG00000260289	-3.06857	8.38944	0.0348666	0.46685	AC093515.1	16	7888489	7894395	-	445	lincRNA	novel transcript	-	1	9	0.0946799	0.920386
ENSG00000083814	-1.02322	2.03245	0.0349589	0.467363	ZNF671	19	57719751	57727624	-	3532	protein_coding	zinc finger protein 671 [Source:HGNC Symbol;Acc:HGNC:26279]	zf-C2H2	54	106	0.644156	1.36576
ENSG00000230565	-1.06706	2.09516	0.0350671	0.467797	ZNF32-AS2	10	43645942	43648019	+	905	antisense	ZNF32 antisense RNA 2 [Source:HGNC Symbol;Acc:HGNC:23593]	-	41	83	1.90877	4.17366
ENSG00000246263	-1.03448	2.04838	0.035256	0.468528	UBR5-AS1	8	102239394	102253333	+	2355	antisense	UBR5 antisense RNA 1 [Source:HGNC Symbol;Acc:HGNC:51661]	-	47	93	0.840862	1.79713
ENSG00000158023	-1.09087	2.13002	0.0352672	0.468528	WDR66	12	121917862	122003927	+	16115	protein_coding	WD repeat domain 66 [Source:HGNC Symbol;Acc:HGNC:28506]	-	34	70	0.0888928	0.197677
ENSG00000272872	-1.09087	2.13002	0.0352672	0.468528	AP000525.1	22	15823197	15823890	+	694	sense_intronic	novel transcript, sense intronic to novel transcript	-	34	70	2.06413	4.59014
ENSG00000105404	1.18292	2.27035	0.0353038	0.468528	RABAC1	19	41956681	41959390	-	1999	protein_coding	Rab acceptor 1 [Source:HGNC Symbol;Acc:HGNC:9794]	-	59	25	1.24353	0.569135
ENSG00000137434	-1.12623	2.18288	0.0353038	0.468528	C6orf52	6	10671418	10694797	-	884	protein_coding	chromosome 6 open reading frame 52 [Source:HGNC Symbol;Acc:HGNC:20881]	-	27	57	1.28685	2.93434
ENSG00000152931	-1.01319	2.01837	0.0354213	0.469599	PART1	5	60487713	60547657	+	9752	lincRNA	prostate androgen-regulated transcript 1 [Source:HGNC Symbol;Acc:HGNC:17263]	-	59	115	0.254904	0.536651
ENSG00000177757	-1.26835	2.40886	0.035482	0.469915	FAM87B	1	817371	819837	+	1947	lincRNA	family with sequence similarity 87 member B [Source:HGNC Symbol;Acc:HGNC:32236]	-	18	42	0.389515	0.981683
ENSG00000277977	-1.26835	2.40886	0.035482	0.469915	AC010332.1	19	52392659	52392755	+	97	unprocessed_pseudogene	novel zinc finger pseudogene	-	18	42	7.81841	19.7045
ENSG00000174501	-1.09203	2.13174	0.0358234	0.470248	ANKRD36C	2	95836919	95991831	-	8574	protein_coding	ankyrin repeat domain 36C [Source:HGNC Symbol;Acc:HGNC:32946]	-	33	68	0.162162	0.360922
ENSG00000164778	1.12009	2.17361	0.0358234	0.470248	EN2	7	155458129	155464831	+	3395	protein_coding	engrailed homeobox 2 [Source:HGNC Symbol;Acc:HGNC:3343]	Homeobox	70	31	0.868713	0.415537
ENSG00000269293	-1.09203	2.13174	0.0358234	0.470248	ZSCAN16-AS1	6	28121795	28137293	-	2163	antisense	ZSCAN16 antisense RNA 1 [Source:HGNC Symbol;Acc:HGNC:48982]	-	33	68	0.642799	1.43067
ENSG00000166741	-1.129	2.18708	0.035924	0.470248	NNMT	11	114257787	114313285	+	2919	protein_coding	nicotinamide N-methyltransferase [Source:HGNC Symbol;Acc:HGNC:7861]	-	26	55	0.375281	0.857465
ENSG00000251611	-1.129	2.18708	0.035924	0.470248	FAM160A1-DT	4	151407551	151408835	-	358	lincRNA	FAM160A1 divergent transcript [Source:HGNC Symbol;Acc:HGNC:53123]	-	26	55	3.05991	6.99145
ENSG00000148584	1.07597	2.10814	0.0360754	0.470248	A1CF	10	50799409	50885675	-	9603	protein_coding	APOBEC1 complementation factor [Source:HGNC Symbol;Acc:HGNC:24086]	-	81	37	0.355382	0.175341
ENSG00000145700	-1.28004	2.42845	0.0361572	0.470248	ANKRD31	5	75068275	75236878	-	6273	protein_coding	ankyrin repeat domain 31 [Source:HGNC Symbol;Acc:HGNC:26853]	-	17	40	0.11418	0.290183
ENSG00000258754	-1.09326	2.13356	0.0364108	0.470248	LINC01579	15	93718542	94070820	-	6795	lincRNA	long intergenic non-protein coding RNA 1579 [Source:HGNC Symbol;Acc:HGNC:27519]	-	32	66	0.198417	0.44202
ENSG00000273679	-1.19058	2.28244	0.0365821	0.470248	AC100757.1	15	22371736	22373570	+	1835	processed_pseudogene	ring finger protein 145 (Rnf145) pseudogene	-	24	53	0.551053	1.3144
ENSG00000054392	-1.30767	2.47541	0.0376208	0.470248	HHAT	1	210328252	210676296	+	6641	protein_coding	hedgehog acyltransferase [Source:HGNC Symbol;Acc:HGNC:18270]	-	15	36	0.0951646	0.246693
ENSG00000272512	-1.30767	2.47541	0.0376208	0.470248	AL645608.7	1	995966	998051	-	2086	lincRNA	novel transcript	-	15	36	0.302967	0.785373
ENSG00000170419	-1.30767	2.47541	0.0376208	0.470248	VSTM2A	7	54542325	54571080	+	5967	protein_coding	V-set and transmembrane domain containing 2A [Source:HGNC Symbol;Acc:HGNC:28499]	-	15	36	0.105914	0.274558
ENSG00000197497	-1.0196	2.02736	0.0376598	0.470248	ZNF665	19	53159213	53193386	-	7475	protein_coding	zinc finger protein 665 [Source:HGNC Symbol;Acc:HGNC:25885]	zf-C2H2	48	94	0.27055	0.572274
ENSG00000184828	-1.09596	2.13756	0.0376897	0.470248	ZBTB7C	18	48026673	48410752	-	7648	protein_coding	zinc finger and BTB domain containing 7C [Source:HGNC Symbol;Acc:HGNC:31700]	ZBTB	30	62	0.165269	0.368919
ENSG00000257176	-1.09596	2.13756	0.0376897	0.470248	AC009318.1	12	29280418	29317848	-	2813	antisense	uncharacterized LOC100506606 [Source:NCBI gene;Acc:100506606]	-	30	62	0.449334	1.00302
ENSG00000111817	-1.06914	2.09819	0.0377926	0.470248	DSE	6	116254173	116444860	+	19193	protein_coding	dermatan sulfate epimerase [Source:HGNC Symbol;Acc:HGNC:21144]	-	36	73	0.0790274	0.173088
ENSG00000264956	-1.06914	2.09819	0.0377926	0.470248	AC138761.3	17	22266425	22288133	+	2920	lincRNA	novel transcript	-	36	73	0.519443	1.1377
ENSG00000231160	-1.20248	2.30135	0.0380252	0.470248	KLF3-AS1	4	38612701	38664883	-	4830	processed_transcript	KLF3 antisense RNA 1 [Source:HGNC Symbol;Acc:HGNC:25796]	-	22	49	0.191908	0.461675
ENSG00000181418	1.16581	2.2436	0.0388178	0.470248	DDN	12	48995149	48999309	-	3749	protein_coding	dendrin [Source:HGNC Symbol;Acc:HGNC:24458]	-	49	21	0.550679	0.254913
ENSG00000210191	-1.20923	2.31214	0.0388178	0.470248	MT-TL2	MT	12266	12336	+	71	Mt_tRNA	mitochondrially encoded tRNA leucine 2 (CUN) [Source:HGNC Symbol;Acc:HGNC:7491]	-	21	47	12.4617	30.125
ENSG00000279602	-1.00704	2.00978	0.039026	0.470248	AC109326.1	17	43360041	43361361	-	1321	TEC	TEC	-	51	99	1.62662	3.41052
ENSG00000217258	-1.34294	2.53668	0.0392385	0.470248	AC007249.1	2	10452319	10455552	+	494	lincRNA	novel transcript	-	13	32	1.10875	2.94789
ENSG00000259659	-1.34294	2.53668	0.0392385	0.470248	AC009996.1	15	44557829	44559188	+	653	sense_intronic	novel transcript	-	13	32	0.83878	2.2301
ENSG00000226686	-1.00613	2.00851	0.0395674	0.470248	LINC01535	19	37251912	37265535	+	2187	lincRNA	long intergenic non-protein coding RNA 1535 [Source:HGNC Symbol;Acc:HGNC:51282]	-	50	97	0.96325	2.01842
ENSG00000225470	-1.04948	2.06978	0.0395766	0.470248	JPX	X	73944184	74070408	+	13557	lincRNA	JPX transcript, XIST activator [Source:HGNC Symbol;Acc:HGNC:37191]	-	39	78	0.121205	0.26183
ENSG00000278611	-1.21662	2.32401	0.0396637	0.470248	ZNF426-DT	19	9538733	9539734	+	865	lincRNA	ZNF426 divergent transcript [Source:HGNC Symbol;Acc:HGNC:53777]	-	20	45	0.974163	2.36747
ENSG00000197816	-1.10075	2.14467	0.0399163	0.470248	CCDC180	9	97307304	97378524	+	14155	protein_coding	coiled-coil domain containing 180 [Source:HGNC Symbol;Acc:HGNC:29303]	-	27	56	0.0803659	0.180039
ENSG00000224063	-1.10075	2.14467	0.0399163	0.470248	AC007319.1	2	187003220	187554663	+	1472	antisense	novel transcript, antisense to TFPI and CALCRL	-	27	56	0.772812	1.73128
ENSG00000258986	1.02095	2.02925	0.0401334	0.470248	TMEM179	14	104474678	104605647	-	4873	protein_coding	transmembrane protein 179 [Source:HGNC Symbol;Acc:HGNC:20137]	-	99	47	0.855966	0.438924
ENSG00000006837	-1.22473	2.33712	0.0405677	0.470248	CDKL3	5	134286350	134371047	-	3057	protein_coding	cyclin dependent kinase like 3 [Source:HGNC Symbol;Acc:HGNC:15483]	-	19	43	0.261864	0.640119
ENSG00000285669	-1.10259	2.1474	0.0407562	0.470248	AC026979.4	8	30192429	30201332	+	4587	lincRNA	novel transcript	-	26	54	0.238815	0.535738
ENSG00000123104	1.0641	2.09086	0.0409575	0.470248	ITPR2	12	26336515	26833198	-	12750	protein_coding	inositol 1,4,5-trisphosphate receptor type 2 [Source:HGNC Symbol;Acc:HGNC:6181]	-	76	35	0.251143	0.124924
ENSG00000259065	-1.04935	2.0696	0.0409575	0.470248	AC005520.2	14	73787360	73803270	+	688	antisense	uncharacterized LOC100506476 [Source:NCBI gene;Acc:100506476]	-	37	74	2.26585	4.89476
ENSG00000167874	-1.04935	2.0696	0.0409575	0.470248	TMEM88	17	7855065	7856099	+	875	protein_coding	transmembrane protein 88 [Source:HGNC Symbol;Acc:HGNC:32371]	-	37	74	1.78161	3.84868
ENSG00000101194	-5.64037	49.8793	0.0409646	0.470248	SLC17A9	20	62952647	62969585	+	5521	protein_coding	solute carrier family 17 member 9 [Source:HGNC Symbol;Acc:HGNC:16192]	-	0	6	0	0.0494563
ENSG00000138829	-5.64037	49.8793	0.0409646	0.470248	FBN2	5	128257909	128659185	-	13196	protein_coding	fibrillin 2 [Source:HGNC Symbol;Acc:HGNC:3604]	-	0	6	0	0.0206917
ENSG00000165556	-5.64037	49.8793	0.0409646	0.470248	CDX2	13	27962137	27971139	-	4122	protein_coding	caudal type homeobox 2 [Source:HGNC Symbol;Acc:HGNC:1806]	Homeobox	0	6	0	0.0662416
ENSG00000176566	-5.64037	49.8793	0.0409646	0.470248	DCAF4L2	8	87870743	87874068	-	3326	protein_coding	DDB1 and CUL4 associated factor 4 like 2 [Source:HGNC Symbol;Acc:HGNC:26657]	-	0	6	0	0.082095
ENSG00000172927	-5.64037	49.8793	0.0409646	0.470248	MYEOV	11	69294138	69367726	+	3760	protein_coding	myeloma overexpressed [Source:HGNC Symbol;Acc:HGNC:7563]	-	0	6	0	0.0726191
ENSG00000161243	-5.64037	49.8793	0.0409646	0.470248	FBXO27	19	38990714	39032785	-	2833	protein_coding	F-box protein 27 [Source:HGNC Symbol;Acc:HGNC:18753]	-	0	6	0	0.0963812
ENSG00000166407	-5.64037	49.8793	0.0409646	0.470248	LMO1	11	8224304	8268716	-	1690	protein_coding	LIM domain only 1 [Source:HGNC Symbol;Acc:HGNC:6641]	-	0	6	0	0.161567
ENSG00000108950	-5.64037	49.8793	0.0409646	0.470248	FAM20A	17	68535113	68601389	-	6203	protein_coding	FAM20A, golgi associated secretory pathway pseudokinase [Source:HGNC Symbol;Acc:HGNC:23015]	-	0	6	0	0.0440187
ENSG00000176463	5.58952	48.1518	0.0409646	0.470248	SLCO3A1	15	91853695	92172435	+	9435	protein_coding	solute carrier organic anion transporter family member 3A1 [Source:HGNC Symbol;Acc:HGNC:10952]	-	6	0	0.0267934	0
ENSG00000249158	-5.64037	49.8793	0.0409646	0.470248	PCDHA11	5	140868183	141012344	+	6284	protein_coding	protocadherin alpha 11 [Source:HGNC Symbol;Acc:HGNC:8665]	-	0	6	0	0.0434513
ENSG00000118308	-5.64037	49.8793	0.0409646	0.470248	LRMP	12	25004342	25108334	+	6610	protein_coding	lymphoid restricted membrane protein [Source:HGNC Symbol;Acc:HGNC:6690]	-	0	6	0	0.0413083
ENSG00000228709	-5.64037	49.8793	0.0409646	0.470248	LINC02575	21	44485577	44490288	+	912	lincRNA	long intergenic non-protein coding RNA 2575 [Source:HGNC Symbol;Acc:HGNC:53747]	-	0	6	0	0.299395
ENSG00000204967	5.58952	48.1518	0.0409646	0.470248	PCDHA4	5	140806929	141012344	+	13440	protein_coding	protocadherin alpha 4 [Source:HGNC Symbol;Acc:HGNC:8670]	-	6	0	0.0188092	0
ENSG00000148204	-5.64037	49.8793	0.0409646	0.470248	CRB2	9	123356170	123380324	+	6349	protein_coding	crumbs 2, cell polarity complex component [Source:HGNC Symbol;Acc:HGNC:18688]	-	0	6	0	0.0430065
ENSG00000156265	5.58952	48.1518	0.0409646	0.470248	MAP3K7CL	21	29077471	29175889	+	4497	protein_coding	MAP3K7 C-terminal like [Source:HGNC Symbol;Acc:HGNC:16457]	-	6	0	0.0562142	0
ENSG00000285906	-5.64037	49.8793	0.0409646	0.470248	AC083855.2	3	11193439	11225877	-	996	antisense		-	0	6	0	0.274145
ENSG00000285106	-5.64037	49.8793	0.0409646	0.470248	AC016831.6	7	130791264	131110161	-	11088	lincRNA	novel transcript	-	0	6	0	0.0246255
ENSG00000198768	-5.64037	49.8793	0.0409646	0.470248	APCDD1L	20	58459101	58515131	-	3942	protein_coding	APC down-regulated 1 like [Source:HGNC Symbol;Acc:HGNC:26892]	-	0	6	0	0.0692664
ENSG00000127903	5.58952	48.1518	0.0409646	0.470248	ZNF835	19	56661981	56671783	-	3473	protein_coding	zinc finger protein 835 [Source:HGNC Symbol;Acc:HGNC:34332]	zf-C2H2	6	0	0.0727888	0
ENSG00000117009	-5.64037	49.8793	0.0409646	0.470248	KMO	1	241532134	241595642	+	5946	protein_coding	kynurenine 3-monooxygenase [Source:HGNC Symbol;Acc:HGNC:6381]	-	0	6	0	0.0459213
ENSG00000216588	-5.64037	49.8793	0.0409646	0.470248	IGSF23	19	44613630	44636781	+	1347	protein_coding	immunoglobulin superfamily member 23 [Source:HGNC Symbol;Acc:HGNC:40040]	-	0	6	0	0.202708
ENSG00000225762	5.58952	48.1518	0.0409646	0.470248	LINC01389	1	47380928	47408477	-	483	antisense	long intergenic non-protein coding RNA 1389 [Source:HGNC Symbol;Acc:HGNC:50661]	-	6	0	0.523386	0
ENSG00000273306	-5.64037	49.8793	0.0409646	0.470248	AC018690.1	2	99405218	99405843	+	626	antisense	novel transcript	-	0	6	0	0.436179
ENSG00000227258	-5.64037	49.8793	0.0409646	0.470248	SMIM2-AS1	13	44110451	44240517	+	3009	antisense	SMIM2 antisense RNA 1 [Source:HGNC Symbol;Acc:HGNC:42674]	-	0	6	0	0.0907438
ENSG00000009790	-5.64037	49.8793	0.0409646	0.470248	TRAF3IP3	1	209756032	209782320	+	7750	protein_coding	TRAF3 interacting protein 3 [Source:HGNC Symbol;Acc:HGNC:30766]	-	0	6	0	0.035232
ENSG00000283235	-5.64037	49.8793	0.0409646	0.470248	AC139493.2	5	176173345	176199295	-	2436	processed_transcript	novel transcript	-	0	6	0	0.112089
ENSG00000232021	-5.64037	49.8793	0.0409646	0.470248	LEF1-AS1	4	108167525	108256836	+	4799	processed_transcript	LEF1 antisense RNA 1 [Source:HGNC Symbol;Acc:HGNC:40339]	-	0	6	0	0.0568968
ENSG00000141837	-5.64037	49.8793	0.0409646	0.470248	CACNA1A	19	13206442	13633025	-	43159	protein_coding	calcium voltage-gated channel subunit alpha1 A [Source:HGNC Symbol;Acc:HGNC:1388]	-	0	6	0	0.00632656
ENSG00000280587	-5.64037	49.8793	0.0409646	0.470248	LINC01348	1	235065479	235074220	-	3262	lincRNA	long intergenic non-protein coding RNA 1348 [Source:HGNC Symbol;Acc:HGNC:50567]	-	0	6	0	0.0837057
ENSG00000274370	5.58952	48.1518	0.0409646	0.470248	AC130371.2	17	83098377	83098987	+	611	lincRNA	novel transcript	-	6	0	0.41374	0
ENSG00000251393	-5.64037	49.8793	0.0409646	0.470248	AC005280.1	14	73462423	73477175	+	680	processed_transcript	novel transcript, antisense to NUMB and HEATR4	-	0	6	0	0.401541
ENSG00000206634	-5.64037	49.8793	0.0409646	0.470248	SNORA22	7	65755526	65755659	+	134	snoRNA	small nucleolar RNA, H/ACA box 22 [Source:HGNC Symbol;Acc:HGNC:32612]	-	0	6	0	2.03767
ENSG00000226191	-5.64037	49.8793	0.0409646	0.470248	CLK3P2	1	247936061	247937513	-	1453	processed_pseudogene	CDC like kinase 3 pseudogene 2 [Source:HGNC Symbol;Acc:HGNC:49786]	-	0	6	0	0.18792
ENSG00000230438	5.58952	48.1518	0.0409646	0.470248	SERPINB9P1	6	2854657	2881407	-	1460	lincRNA	serpin family B member 9 pseudogene 1 [Source:HGNC Symbol;Acc:HGNC:28590]	-	6	0	0.173148	0
ENSG00000225472	-5.64037	49.8793	0.0409646	0.470248	AL136366.1	9	14317085	14357908	+	1054	antisense	novel transcript	-	0	6	0	0.259059
ENSG00000285649	5.58952	48.1518	0.0409646	0.470248	AL357079.2	1	43968351	43974821	-	2044	antisense	novel transcript, antisense to DPH2 and ATP6V0B	-	6	0	0.123677	0
ENSG00000226690	-5.64037	49.8793	0.0409646	0.470248	AC013470.2	7	12469621	12542222	+	3737	protein_coding	uncharacterized LOC102725191 [Source:NCBI gene;Acc:102725191]	-	0	6	0	0.0730661
ENSG00000260388	5.58952	48.1518	0.0409646	0.470248	LINC00562	13	47930153	47932622	-	2470	lincRNA	long intergenic non-protein coding RNA 562 [Source:HGNC Symbol;Acc:HGNC:43706]	-	6	0	0.102346	0
ENSG00000275580	-5.64037	49.8793	0.0409646	0.470248	AC022306.2	15	49343608	49344254	+	647	lincRNA	novel transcript, sense intronic to GALK2	-	0	6	0	0.422022
ENSG00000260314	-5.64037	49.8793	0.0409646	0.470248	MRC1	10	17809344	17911170	+	5198	protein_coding	mannose receptor C-type 1 [Source:HGNC Symbol;Acc:HGNC:7228]	-	0	6	0	0.0525294
ENSG00000213640	-5.64037	49.8793	0.0409646	0.470248	EEF1DP4	7	64862999	64864370	+	880	processed_pseudogene	eukaryotic translation elongation factor 1 delta pseudogene 4 [Source:HGNC Symbol;Acc:HGNC:22598]	-	0	6	0	0.310282
ENSG00000230601	5.58952	48.1518	0.0409646	0.470248	TEX48	9	114666434	114682066	-	708	protein_coding	testis expressed 48 [Source:HGNC Symbol;Acc:HGNC:52393]	-	6	0	0.357056	0
ENSG00000224511	-5.64037	49.8793	0.0409646	0.470248	LINC00365	13	30103178	30108875	-	2998	lincRNA	long intergenic non-protein coding RNA 365 [Source:HGNC Symbol;Acc:HGNC:42687]	-	0	6	0	0.0910767
ENSG00000115828	-5.64037	49.8793	0.0409646	0.470248	QPCT	2	37342827	37373322	+	2696	protein_coding	glutaminyl-peptide cyclotransferase [Source:HGNC Symbol;Acc:HGNC:9753]	-	0	6	0	0.101279
ENSG00000248240	-5.64037	49.8793	0.0409646	0.470248	AC114956.1	5	43515274	43525310	+	512	antisense	novel transcript	-	0	6	0	0.533297
ENSG00000254528	-5.64037	49.8793	0.0409646	0.470248	AP000757.1	11	117833719	117838942	+	1464	antisense	novel transcript, antisense to FXYD6	-	0	6	0	0.186508
ENSG00000268182	5.58952	48.1518	0.0409646	0.470248	SMIM17	19	56643145	56655766	+	1076	protein_coding	small integral membrane protein 17 [Source:HGNC Symbol;Acc:HGNC:27114]	-	6	0	0.23494	0
ENSG00000254207	-5.64037	49.8793	0.0409646	0.470248	AC100797.1	8	725188	725877	-	316	sense_intronic	novel transcript	-	0	6	0	0.864076
ENSG00000233614	5.58952	48.1518	0.0409646	0.470248	DDX11L10	16	11555	14090	+	1723	transcribed_unprocessed_pseudogene	DEAD/H-box helicase 11 like 10 [Source:HGNC Symbol;Acc:HGNC:14125]	-	6	0	0.146718	0
ENSG00000234289	5.58952	48.1518	0.0409646	0.470248	H2BFS	21	43565189	43565648	+	460	protein_coding	H2B histone family member S [Source:HGNC Symbol;Acc:HGNC:4762]	-	6	0	0.549555	0
ENSG00000270116	-5.64037	49.8793	0.0409646	0.470248	AP001429.1	21	37100814	37101343	+	530	sense_intronic	novel transcript, sense intronic to TTC3	-	0	6	0	0.515185
ENSG00000283234	5.58952	48.1518	0.0409646	0.470248	AL590556.2	1	21950679	21956871	-	1162	transcribed_unitary_pseudogene	novel pseudogene	-	6	0	0.217552	0
ENSG00000273063	-5.64037	49.8793	0.0409646	0.470248	AC007250.1	2	58241349	58241686	+	338	antisense	novel transcript	-	0	6	0	0.807834
ENSG00000263326	-5.64037	49.8793	0.0409646	0.470248	AC133552.4	16	25071490	25072727	-	676	unprocessed_pseudogene	thyroid hormone receptor interactor 11 (TRIP11) pseudogene	-	0	6	0	0.403917
ENSG00000165072	-5.64037	49.8793	0.0409646	0.470248	MAMDC2	9	70043581	70226970	+	3854	protein_coding	MAM domain containing 2 [Source:HGNC Symbol;Acc:HGNC:23673]	-	0	6	0	0.0708479
ENSG00000232936	-5.64037	49.8793	0.0409646	0.470248	AL157400.2	10	89645282	89650667	+	605	antisense	uncharacterized LOC105378421 [Source:NCBI gene;Acc:105378421]	-	0	6	0	0.451319
ENSG00000259370	-5.64037	49.8793	0.0409646	0.470248	AC103740.1	15	62827675	62884034	-	8535	antisense	uncharacterized LOC105370854 [Source:NCBI gene;Acc:105370854]	-	0	6	0	0.0319916
ENSG00000248837	5.58952	48.1518	0.0409646	0.470248	AC097512.1	4	22997551	23056862	+	2175	lincRNA	uncharacterized LOC105374524 [Source:NCBI gene;Acc:105374524]	-	6	0	0.116228	0
ENSG00000187144	-5.64037	49.8793	0.0409646	0.470248	SPATA21	1	16387117	16437424	-	4506	protein_coding	spermatogenesis associated 21 [Source:HGNC Symbol;Acc:HGNC:28026]	-	0	6	0	0.0605965
ENSG00000147206	5.58952	48.1518	0.0409646	0.470248	NXF3	X	103075810	103093125	-	3526	protein_coding	nuclear RNA export factor 3 [Source:HGNC Symbol;Acc:HGNC:8073]	-	6	0	0.0716947	0
ENSG00000235481	-5.64037	49.8793	0.0409646	0.470248	UBE2R2-AS1	9	33785950	33818795	-	647	antisense	UBE2R2 antisense RNA 1 [Source:HGNC Symbol;Acc:HGNC:49911]	-	0	6	0	0.422022
ENSG00000186628	5.58952	48.1518	0.0409646	0.470248	FSD2	15	82755362	82806070	-	6536	protein_coding	fibronectin type III and SPRY domain containing 2 [Source:HGNC Symbol;Acc:HGNC:18024]	-	6	0	0.0386774	0
ENSG00000130656	-5.64037	49.8793	0.0409646	0.470248	HBZ	16	152687	154503	+	755	protein_coding	hemoglobin subunit zeta [Source:HGNC Symbol;Acc:HGNC:4835]	-	0	6	0	0.361653
ENSG00000261442	-5.64037	49.8793	0.0409646	0.470248	AC023830.1	16	4634329	4640623	-	1543	antisense	novel transcript, antisense to MGRN1	-	0	6	0	0.176959
ENSG00000176358	-5.64037	49.8793	0.0409646	0.470248	TAC4	17	49838309	49848017	-	1001	protein_coding	tachykinin 4 [Source:HGNC Symbol;Acc:HGNC:16641]	-	0	6	0	0.272775
ENSG00000267731	-5.64037	49.8793	0.0409646	0.470248	AC005332.2	17	68189884	68192802	+	2919	lincRNA	novel transcript	-	0	6	0	0.0935416
ENSG00000272343	5.58952	48.1518	0.0409646	0.470248	AC107952.2	8	56222688	56223173	+	486	lincRNA	novel transcript	-	6	0	0.520155	0
ENSG00000285911	-5.64037	49.8793	0.0409646	0.470248	AL391834.3	9	19386927	19408532	-	803	bidirectional_promoter_lncRNA		-	0	6	0	0.340035
ENSG00000213412	-5.64037	49.8793	0.0409646	0.470248	HNRNPA1P33	10	46415853	46416413	+	561	processed_pseudogene	heterogeneous nuclear ribonucleoprotein A1 pseudogene 33 [Source:HGNC Symbol;Acc:HGNC:44990]	-	0	6	0	0.486717
ENSG00000182586	5.58952	48.1518	0.0409646	0.470248	LINC00334	21	45234340	45264548	+	1764	lincRNA	long intergenic non-protein coding RNA 334 [Source:HGNC Symbol;Acc:HGNC:16425]	-	6	0	0.143308	0
ENSG00000277701	-5.64037	49.8793	0.0409646	0.470248	AC159540.2	2	97281904	97291780	+	3067	lincRNA	novel transcript	-	0	6	0	0.0890277
ENSG00000236391	-5.64037	49.8793	0.0409646	0.470248	AC092573.2	2	173338219	173356208	-	457	transcribed_processed_pseudogene	novel pseudogene	-	0	6	0	0.597479
ENSG00000168060	5.58952	48.1518	0.0409646	0.470248	NAALADL1	11	65044818	65058549	-	4044	protein_coding	N-acetylated alpha-linked acidic dipeptidase like 1 [Source:HGNC Symbol;Acc:HGNC:23536]	-	6	0	0.0625112	0
ENSG00000273585	-5.64037	49.8793	0.0409646	0.470248	LINC02348	15	101613676	101614339	-	489	lincRNA	long intergenic non-protein coding RNA 2348 [Source:HGNC Symbol;Acc:HGNC:53270]	-	0	6	0	0.55838
ENSG00000248098	-5.64037	49.8793	0.0409646	0.470248	BCKDHA	19	41397460	41425005	+	2602	protein_coding	branched chain keto acid dehydrogenase E1, alpha polypeptide [Source:HGNC Symbol;Acc:HGNC:986]	-	0	6	0	0.104938
ENSG00000273513	-5.64037	49.8793	0.0409646	0.470248	TBC1D3K	17	37924415	37935365	+	2116	protein_coding	TBC1 domain family member 3K [Source:HGNC Symbol;Acc:HGNC:51245]	-	0	6	0	0.12904
ENSG00000218631	-5.64037	49.8793	0.0409646	0.470248	AL117344.1	6	157372556	157373171	-	616	processed_pseudogene	novel pseudogene	-	0	6	0	0.44326
ENSG00000227382	-5.64037	49.8793	0.0409646	0.470248	EIF4A2P2	10	73199826	73201225	+	1070	processed_pseudogene	eukaryotic translation initiation factor 4A2 pseudogene 2 [Source:HGNC Symbol;Acc:HGNC:45099]	-	0	6	0	0.255185
ENSG00000239291	-5.64037	49.8793	0.0409646	0.470248	AC002558.1	17	47159191	47159993	-	803	processed_pseudogene	ribosomal protein S2 (RPS2) pseudogene	-	0	6	0	0.340035
ENSG00000204666	-5.64037	49.8793	0.0409646	0.470248	AC010624.1	19	50050589	50066793	+	1525	sense_overlapping	uncharacterized LOC400710 [Source:NCBI gene;Acc:400710]	-	0	6	0	0.179048
ENSG00000229930	-5.64037	49.8793	0.0409646	0.470248	AC138393.2	1	224030704	224035056	-	246	unprocessed_pseudogene	F-box only protein 25 (FBXO25) pseudogene	-	0	6	0	1.10995
ENSG00000224662	-5.64037	49.8793	0.0409646	0.470248	ATP6V1G1P3	9	136779939	136780218	+	280	processed_pseudogene	ATPase H+ transporting V1 subunit G1 pseudogene 3 [Source:HGNC Symbol;Acc:HGNC:37670]	-	0	6	0	0.975171
ENSG00000280163	-5.64037	49.8793	0.0409646	0.470248	AC040160.2	16	67205175	67206849	-	1675	TEC	novel transcript	-	0	6	0	0.163014
ENSG00000273687	5.58952	48.1518	0.0409646	0.470248	AC004223.3	17	35018660	35018991	+	332	antisense	novel transcript, antisense to RFFL	-	6	0	0.761432	0
ENSG00000225886	-5.64037	49.8793	0.0409646	0.470248	AL445490.1	1	27669468	27703063	+	1651	antisense	novel transcript, antisense to IFI6	-	0	6	0	0.165383
ENSG00000280225	-5.64037	49.8793	0.0409646	0.470248	AC237221.2	7	57402181	57404717	-	2537	TEC	TEC	-	0	6	0	0.107626
ENSG00000267439	-5.64037	49.8793	0.0409646	0.470248	AD000671.3	19	35747057	35753415	-	2040	antisense	novel transcript	-	0	6	0	0.133847
ENSG00000275426	-5.64037	49.8793	0.0409646	0.470248	AC253576.2	4	149738	150317	+	580	sense_intronic	novel transcript	-	0	6	0	0.470772
ENSG00000229373	-5.64037	49.8793	0.0409646	0.470248	LINC00452	13	113888306	113923512	+	3578	lincRNA	long intergenic non-protein coding RNA 452 [Source:HGNC Symbol;Acc:HGNC:42800]	-	0	6	0	0.076313
ENSG00000276593	-5.64037	49.8793	0.0409646	0.470248	AC022306.3	15	49353485	49354034	+	550	sense_intronic	novel transcript, sense intronic to GALK2	-	0	6	0	0.496451
ENSG00000284716	-5.64037	49.8793	0.0409646	0.470248	AL034417.3	1	7998187	7999934	-	1043	lincRNA	novel transcript	-	0	6	0	0.261791
ENSG00000199890	5.58952	48.1518	0.0409646	0.470248	RF00019	1	111446798	111446908	+	111	misc_RNA		-	6	0	2.27744	0
ENSG00000224014	5.58952	48.1518	0.0409646	0.470248	AL390728.3	1	247175256	247175525	+	270	processed_pseudogene	SMT3 suppressor of mif two 3 homolog 3 (yeast) (SUMO3) pseudogene	-	6	0	0.936279	0
ENSG00000252172	-5.64037	49.8793	0.0409646	0.470248	RNU6-720P	3	149917342	149917449	-	108	snRNA	RNA, U6 small nuclear 720, pseudogene [Source:HGNC Symbol;Acc:HGNC:47683]	-	0	6	0	2.52822
ENSG00000214544	-5.64037	49.8793	0.0409646	0.470248	GTF2IRD2P1	7	73242751	73280119	-	3528	transcribed_unprocessed_pseudogene	GTF2I repeat domain containing 2 pseudogene 1 [Source:HGNC Symbol;Acc:HGNC:33127]	-	0	6	0	0.0773946
ENSG00000251484	-5.64037	49.8793	0.0409646	0.470248	AL356488.1	1	109103535	109104766	-	609	processed_pseudogene	poly(rC) binding protein 1 (PCBP1) pseudogene	-	0	6	0	0.448355
ENSG00000230342	-5.64037	49.8793	0.0409646	0.470248	FANCD2P2	3	11859674	11891172	+	1400	unprocessed_pseudogene	FANCD2 pseudogene 2 [Source:HGNC Symbol;Acc:HGNC:44488]	-	0	6	0	0.195034
ENSG00000250769	-5.64037	49.8793	0.0409646	0.470248	AC119751.5	4	49507764	49508806	-	770	processed_pseudogene	coiled-coil domain containing 144 family (CCDC144) pseudogene	-	0	6	0	0.354608
ENSG00000271440	5.58952	48.1518	0.0409646	0.470248	AL121932.1	6	28633381	28633594	-	214	processed_pseudogene	cytochrome c oxidase subunit VIIIC (COX8C) pseudogene	-	6	0	1.18129	0
ENSG00000186466	-5.64037	49.8793	0.0409646	0.470248	AQP7P1	9	63317067	63333091	-	1045	unprocessed_pseudogene	aquaporin 7 pseudogene 1 [Source:HGNC Symbol;Acc:HGNC:32048]	-	0	6	0	0.26129
ENSG00000265996	-5.64037	49.8793	0.0409646	0.470248	MIR3671	1	65057755	65057842	-	88	miRNA	microRNA 3671 [Source:HGNC Symbol;Acc:HGNC:38925]	-	0	6	0	3.10282
ENSG00000199530	-5.64037	49.8793	0.0409646	0.470248	RF00019	4	82944738	82944845	-	108	misc_RNA		-	0	6	0	2.52822
ENSG00000251298	-5.64037	49.8793	0.0409646	0.470248	AC093835.1	4	147609552	147617245	-	568	antisense	novel transcript	-	0	6	0	0.480718
ENSG00000278601	-5.64037	49.8793	0.0409646	0.470248	AL158163.2	10	110907483	110908182	+	700	antisense	novel transcript, antisense to BBIP1	-	0	6	0	0.390069
ENSG00000233651	5.58952	48.1518	0.0409646	0.470248	AL590399.5	9	62387171	62394004	-	3325	lincRNA	novel transcript	-	6	0	0.0760287	0
ENSG00000269373	5.58952	48.1518	0.0409646	0.470248	AC008739.2	19	20838515	20847417	-	317	unprocessed_pseudogene	novel zinc finger protein pseudogene	-	6	0	0.797462	0
ENSG00000167754	5.58952	48.1518	0.0409646	0.470248	KLK5	19	50943303	50953093	-	1653	protein_coding	kallikrein related peptidase 5 [Source:HGNC Symbol;Acc:HGNC:6366]	-	6	0	0.152931	0
ENSG00000274080	5.58952	48.1518	0.0409646	0.470248	AC005089.1	7	73609262	73611502	-	2241	sense_intronic	novel transcript	-	6	0	0.112805	0
ENSG00000285706	-5.64037	49.8793	0.0409646	0.470248	AL807776.1	9	98798466	98807564	-	1938	bidirectional_promoter_lncRNA	Novel transcript	-	0	6	0	0.140892
ENSG00000266667	-5.64037	49.8793	0.0409646	0.470248	AC005703.4	17	15379864	15417878	-	538	lincRNA	novel transcript	-	0	6	0	0.507524
ENSG00000237138	5.58952	48.1518	0.0409646	0.470248	HUNK-AS1	21	32020966	32021782	-	616	antisense	HUNK antisense RNA 1 [Source:HGNC Symbol;Acc:HGNC:40631]	-	6	0	0.410382	0
ENSG00000273165	-5.64037	49.8793	0.0409646	0.470248	AL121652.1	2	31852976	31853423	-	448	lincRNA	novel transcript	-	0	6	0	0.609482
ENSG00000280228	-5.64037	49.8793	0.0409646	0.470248	AC079753.1	2	112840328	112844195	+	3868	TEC	TEC	-	0	6	0	0.0705915
ENSG00000239483	-5.64037	49.8793	0.0409646	0.470248	RPS15AP16	3	128798841	128799201	-	361	processed_pseudogene	ribosomal protein S15a pseudogene 16 [Source:HGNC Symbol;Acc:HGNC:36764]	-	0	6	0	0.756366
ENSG00000250266	5.58952	48.1518	0.0409646	0.470248	LINC01612	4	170273919	170283079	+	469	lincRNA	long intergenic non-protein coding RNA 1612 [Source:HGNC Symbol;Acc:HGNC:51837]	-	6	0	0.539009	0
ENSG00000230013	-5.64037	49.8793	0.0409646	0.470248	AL359182.2	9	104990796	104991781	-	606	lincRNA	novel transcript	-	0	6	0	0.450574
ENSG00000258215	-5.64037	49.8793	0.0409646	0.470248	AC078886.1	12	80860955	80861508	-	554	processed_pseudogene	tripartite motif containing 61 (TRIM61) pseudogene	-	0	6	0	0.492866
ENSG00000277435	-5.64037	49.8793	0.0409646	0.470248	AC138649.2	15	22690454	22691158	-	705	processed_pseudogene	zinc finger, FYVE domain containing 9 (ZFYVE9) pseudogene	-	0	6	0	0.387302
ENSG00000262039	-5.64037	49.8793	0.0409646	0.470248	AC091180.5	17	49370740	49476988	+	382	antisense	novel transcript, antisense to PHB	-	0	6	0	0.714785
ENSG00000088827	5.58952	48.1518	0.0409646	0.470248	SIGLEC1	20	3686970	3707128	-	7886	protein_coding	sialic acid binding Ig like lectin 1 [Source:HGNC Symbol;Acc:HGNC:11127]	-	6	0	0.0320562	0
ENSG00000276641	-5.64037	49.8793	0.0409646	0.470248	MIR6769A	16	4671318	4671390	+	73	miRNA	microRNA 6769a [Source:HGNC Symbol;Acc:HGNC:50079]	-	0	6	0	3.74038
ENSG00000207034	-5.64037	49.8793	0.0409646	0.470248	RF00019	18	2778941	2779057	+	117	misc_RNA		-	0	6	0	2.33374
ENSG00000237604	5.58952	48.1518	0.0409646	0.470248	AP001056.1	21	44175489	44176453	+	821	lincRNA	novel transcript	-	6	0	0.307912	0
ENSG00000227579	-5.64037	49.8793	0.0409646	0.470248	AL122019.1	1	177393287	177597709	-	938	lincRNA	novel transcript	-	0	6	0	0.291096
ENSG00000199933	-5.64037	49.8793	0.0409646	0.470248	RNY1P16	12	101719808	101719918	+	111	misc_RNA	RNA, Ro-associated Y1 pseudogene 16 [Source:HGNC Symbol;Acc:HGNC:50879]	-	0	6	0	2.45989
ENSG00000212497	-5.64037	49.8793	0.0409646	0.470248	RNA5SP465	19	12027913	12028021	-	109	rRNA_pseudogene	RNA, 5S ribosomal pseudogene 465 [Source:HGNC Symbol;Acc:HGNC:43365]	-	0	6	0	2.50503
ENSG00000196946	5.58952	48.1518	0.0409646	0.470248	ZNF705A	12	8157034	8188537	+	3628	protein_coding	zinc finger protein 705A [Source:HGNC Symbol;Acc:HGNC:32281]	zf-C2H2	6	0	0.069679	0
ENSG00000257004	-5.64037	49.8793	0.0409646	0.470248	AC008115.2	12	12668982	12685075	+	241	lincRNA	novel transcript	-	0	6	0	1.13298
ENSG00000257194	-5.64037	49.8793	0.0409646	0.470248	AC126178.1	12	90107739	90112779	+	926	lincRNA	novel transcript	-	0	6	0	0.294868
ENSG00000256193	-5.64037	49.8793	0.0409646	0.470248	LINC00507	12	127915372	127951552	+	2167	lincRNA	long intergenic non-protein coding RNA 507 [Source:HGNC Symbol;Acc:HGNC:43558]	-	0	6	0	0.126003
ENSG00000281883	-5.64037	49.8793	0.0409646	0.470248	AL512506.3	13	43883800	44028526	+	1792	protein_coding	novel transcript	-	0	6	0	0.152371
ENSG00000259418	-5.64037	49.8793	0.0409646	0.470248	AC091117.2	15	45041716	45058707	-	542	antisense	novel transcript, antisense to SORD	-	0	6	0	0.503779
ENSG00000260035	-5.64037	49.8793	0.0409646	0.470248	AC051619.8	15	45200325	45200632	-	308	sense_intronic	novel transcript	-	0	6	0	0.886519
ENSG00000259610	-5.64037	49.8793	0.0409646	0.470248	AC023034.2	15	81633887	81642190	-	476	lincRNA	novel transcript	-	0	6	0	0.57363
ENSG00000225708	-5.64037	49.8793	0.0409646	0.470248	AL354984.2	20	58069054	58072070	-	1024	lincRNA	novel transcript	-	0	6	0	0.266648
ENSG00000215910	-5.64037	49.8793	0.0409646	0.470248	C1orf167	1	11761787	11789585	+	6499	protein_coding	chromosome 1 open reading frame 167 [Source:HGNC Symbol;Acc:HGNC:25262]	-	0	6	0	0.0420138
ENSG00000270930	-5.64037	49.8793	0.0409646	0.470248	GRAMD4P8	2	131646704	131648372	-	1115	processed_pseudogene	GRAM domain containing 4 pseudogene 8 [Source:HGNC Symbol;Acc:HGNC:49143]	-	0	6	0	0.244886
ENSG00000275930	-5.64037	49.8793	0.0409646	0.470248	RF00019	7	75381638	75381739	+	102	misc_RNA		-	0	6	0	2.67694
ENSG00000260496	5.58952	48.1518	0.0409646	0.470248	AC009041.1	16	991151	1000926	-	1383	lincRNA	novel transcript	-	6	0	0.182788	0
ENSG00000278106	-5.64037	49.8793	0.0409646	0.470248	AF254983.2	21	10397644	10397778	+	135	unprocessed_pseudogene	tubulin tyrosine ligase-like family, member 1 (TTLL1) pseudogene	-	0	6	0	2.02258
ENSG00000283752	5.58952	48.1518	0.0409646	0.470248	AC241585.3	1	145139986	145148375	+	686	unprocessed_pseudogene	phosphodiesterase 4D interacting protein (PDE4DIP) pseudogene	-	6	0	0.368506	0
ENSG00000205301	-5.64037	49.8793	0.0409646	0.470248	MGAT4D	4	140442262	140498377	-	5595	protein_coding	MGAT4 family member D [Source:HGNC Symbol;Acc:HGNC:43619]	-	0	6	0	0.0488021
ENSG00000233183	-5.64037	49.8793	0.0409646	0.470248	AL138889.1	6	33893323	33927631	+	10366	lincRNA	novel transcript	-	0	6	0	0.0263407
ENSG00000276620	-5.64037	49.8793	0.0409646	0.470248	AL591516.1	6	107192300	107192573	+	274	processed_pseudogene	ribosomal L1 domain containing 1 (RSL1D1) pseudogene	-	0	6	0	0.996525
ENSG00000212303	-5.64037	49.8793	0.0409646	0.470248	RNU6-1154P	7	135665599	135665702	-	104	snRNA	RNA, U6 small nuclear 1154, pseudogene [Source:HGNC Symbol;Acc:HGNC:48117]	-	0	6	0	2.62546
ENSG00000273293	5.58952	48.1518	0.0409646	0.470248	AC093458.1	7	149881359	149881580	-	222	lincRNA	novel transcript	-	6	0	1.13872	0
ENSG00000182347	-5.64037	49.8793	0.0409646	0.470248	PDSS1P1	9	5084999	5086112	-	1114	processed_pseudogene	decaprenyl diphosphate synthase subunit 1 pseudogene 1 [Source:HGNC Symbol;Acc:HGNC:49740]	-	0	6	0	0.245106
ENSG00000233814	5.58952	48.1518	0.0409646	0.470248	AL590664.1	9	76419934	76420631	+	339	processed_pseudogene	H3 histone, family 3A (H3F3A) pseudogene	-	6	0	0.745709	0
ENSG00000250210	-5.64037	49.8793	0.0409646	0.470248	FO082796.1	9	138286248	138286430	+	183	unprocessed_pseudogene	septin 14 pseudogene 9	-	0	6	0	1.49207
ENSG00000277563	-5.64037	49.8793	0.0409646	0.470248	AC063961.1	10	24255246	24255333	+	88	misc_RNA		-	0	6	0	3.10282
ENSG00000278896	-5.64037	49.8793	0.0409646	0.470248	AC025031.5	12	46404644	46407166	+	2523	TEC	TEC	-	0	6	0	0.108224
ENSG00000262815	-5.64037	49.8793	0.0409646	0.470248	AC087501.2	17	9464742	9467422	+	513	antisense	novel transcript, antisense to STX8	-	0	6	0	0.532257
ENSG00000283123	5.58952	48.1518	0.0409646	0.470248	RARRES2P11	20	29427400	29427883	-	484	processed_pseudogene	retinoic acid receptor responder 2 pseudogene 11 [Source:HGNC Symbol;Acc:HGNC:51743]	-	6	0	0.522304	0
ENSG00000207802	-5.64037	49.8793	0.0409646	0.470248	MIR646	20	60308474	60308567	+	94	miRNA	microRNA 646 [Source:HGNC Symbol;Acc:HGNC:32902]	-	0	6	0	2.90477
ENSG00000268866	5.58952	48.1518	0.0409646	0.470248	AC020915.4	19	58224506	58225469	+	964	processed_pseudogene	zinc finger protein family pseudogene	-	6	0	0.262236	0
ENSG00000234620	-5.64037	49.8793	0.0409646	0.470248	PUDPP1	Y	15348662	15456074	-	495	unprocessed_pseudogene	pseudouridine 5'-phosphatase pseudogene 1 [Source:HGNC Symbol;Acc:HGNC:20200]	-	0	6	0	0.551612
ENSG00000177675	-1.43996	2.71314	0.0409935	0.470248	CD163L1	12	7346685	7479897	-	5690	protein_coding	CD163 molecule like 1 [Source:HGNC Symbol;Acc:HGNC:30375]	-	11	29	0.0814513	0.231939
ENSG00000272468	1.33694	2.52616	0.0409935	0.470248	AL021807.1	6	27122657	27123221	-	565	lincRNA	novel transcript	-	29	11	2.16256	0.885996
ENSG00000252743	-1.43996	2.71314	0.0409935	0.470248	RNU6-850P	6	31756951	31757053	-	103	snRNA	RNA, U6 small nuclear 850, pseudogene [Source:HGNC Symbol;Acc:HGNC:47813]	-	11	29	4.49959	12.8129
ENSG00000188641	2.33818	5.05664	0.041032	0.470248	DPYD	1	97077743	97995000	-	7131	protein_coding	dihydropyrimidine dehydrogenase [Source:HGNC Symbol;Acc:HGNC:3012]	-	11	2	0.064992	0.0127634
ENSG00000170577	2.33818	5.05664	0.041032	0.470248	SIX2	2	45005161	45009430	-	2205	protein_coding	SIX homeobox 2 [Source:HGNC Symbol;Acc:HGNC:10888]	Homeobox	11	2	0.210185	0.0412771
ENSG00000123685	-2.43836	5.42027	0.041032	0.470248	BATF3	1	212686418	212699985	-	2713	protein_coding	basic leucine zipper ATF-like transcription factor 3 [Source:HGNC Symbol;Acc:HGNC:28915]	TF_bZIP	2	11	0.0310598	0.184515
ENSG00000188596	-2.43836	5.42027	0.041032	0.470248	CFAP54	12	96489571	96875555	+	12914	protein_coding	cilia and flagella associated protein 54 [Source:HGNC Symbol;Acc:HGNC:26456]	-	2	11	0.0065251	0.0387632
ENSG00000189423	-2.43836	5.42027	0.041032	0.470248	USP32P3	17	20415547	20431008	+	2935	transcribed_unprocessed_pseudogene	ubiquitin specific peptidase 32 pseudogene 3 [Source:HGNC Symbol;Acc:HGNC:43576]	-	2	11	0.0287104	0.170558
ENSG00000232439	-2.43836	5.42027	0.041032	0.470248	RPL18AP7	3	38526802	38527325	-	524	processed_pseudogene	ribosomal protein L18a pseudogene 7 [Source:HGNC Symbol;Acc:HGNC:35607]	-	2	11	0.160811	0.955321
ENSG00000204970	2.33818	5.05664	0.041032	0.470248	PCDHA1	5	140786136	141012347	+	5595	protein_coding	protocadherin alpha 1 [Source:HGNC Symbol;Acc:HGNC:8663]	-	11	2	0.0828343	0.0162674
ENSG00000283646	-2.43836	5.42027	0.041032	0.470248	LINC02009	3	46416524	46423591	-	2951	lincRNA	long intergenic non-protein coding RNA 2009 [Source:HGNC Symbol;Acc:HGNC:52845]	-	2	11	0.0285548	0.169633
ENSG00000273492	-2.43836	5.42027	0.041032	0.470248	AP000229.1	21	26170871	26217381	+	2044	lincRNA	novel transcript	-	2	11	0.0412256	0.244906
ENSG00000247151	-2.43836	5.42027	0.041032	0.470248	CSTF3-DT	11	33161657	33191598	+	4012	processed_transcript	CSTF3 divergent transcript [Source:HGNC Symbol;Acc:HGNC:27882]	-	2	11	0.0210033	0.124773
ENSG00000259083	2.33818	5.05664	0.041032	0.470248	AL132639.3	14	39174885	39175880	-	530	antisense	novel transcript, antisense to PNN	-	11	2	0.874449	0.171728
ENSG00000213228	-2.43836	5.42027	0.041032	0.470248	RPL12P38	17	60433678	60435996	-	2319	transcribed_processed_pseudogene	ribosomal protein L12 pseudogene 38 [Source:HGNC Symbol;Acc:HGNC:36838]	-	2	11	0.0363368	0.215864
ENSG00000248746	2.33818	5.05664	0.041032	0.470248	ACTN3	11	66546395	66563329	+	3517	protein_coding	actinin alpha 3 (gene/pseudogene) [Source:HGNC Symbol;Acc:HGNC:165]	-	11	2	0.131777	0.0258789
ENSG00000224652	-2.43836	5.42027	0.041032	0.470248	LINC00885	3	196142636	196160890	+	1828	lincRNA	long intergenic non-protein coding RNA 885 [Source:HGNC Symbol;Acc:HGNC:48571]	-	2	11	0.0460969	0.273845
ENSG00000186714	2.33818	5.05664	0.041032	0.470248	CCDC73	11	32602246	32794658	-	7875	protein_coding	coiled-coil domain containing 73 [Source:HGNC Symbol;Acc:HGNC:23261]	-	11	2	0.0588518	0.0115576
ENSG00000270133	-2.43836	5.42027	0.041032	0.470248	AC025766.1	5	94611906	94618122	-	409	sense_intronic	novel transcript, sense intronic to C5orf36	-	2	11	0.206027	1.22393
ENSG00000266189	2.33818	5.05664	0.041032	0.470248	MIR3186	17	81451104	81451188	-	85	miRNA	microRNA 3186 [Source:HGNC Symbol;Acc:HGNC:38311]	-	11	2	5.45245	1.07078
ENSG00000227726	2.33818	5.05664	0.041032	0.470248	AP001271.1	11	70477277	70477592	-	206	sense_intronic	novel transcript	-	11	2	2.2498	0.441825
[truncated: 127 more rows]
