# Supplementary material for: Culture of Cancer Cells at Physiological Oxygen Levels Affects Gene Expression in a Cell-Type Specific Manner
Source: Preprints.org preprint supplement (doi:10.20944/preprints202208.0497.v1), 2022-08-29
Supplement: Supplementary file 3 [file Table S10 Functional Enrichent PC-3 18% O2.xlsx]

## Sheet: GO
Category	Term	ID	Name	Count	%	PValue	Genes	List Total	Pop Hits	Pop Total	Fold Enrichment	Benjamini padj
GO TERM: BP	GO:0007267~cell-cell signaling	GO:0007267	cell-cell signaling	12	15.7895	0.00273578	ENSG00000105894, ENSG00000165474, ENSG00000095752, ENSG00000074317, ENSG00000121743, ENSG00000105711, ENSG00000183691, ENSG00000205220, ENSG00000175567, ENSG00000213977, ENSG00000171246, ENSG00000150551	49	1713	19277	2.75592	1
GO TERM: BP	GO:1901701~cellular response to oxygen-containing compound	GO:1901701	cellular response to oxygen-containing compound	10	13.1579	0.00298019	ENSG00000105894, ENSG00000207607, ENSG00000165474, ENSG00000277117, ENSG00000125571, ENSG00000175567, ENSG00000176749, ENSG00000171246, ENSG00000150551, ENSG00000176170	49	1230	19277	3.19844	1
GO TERM: BP	GO:0042981~regulation of apoptotic process	GO:0042981	regulation of apoptotic process	11	14.4737	0.00674047	ENSG00000105894, ENSG00000207607, ENSG00000074317, ENSG00000183691, ENSG00000207864, ENSG00000181284, ENSG00000205155, ENSG00000175567, ENSG00000176749, ENSG00000140961, ENSG00000176170	49	1655	19277	2.6148	1
GO TERM: BP	GO:0042063~gliogenesis	GO:0042063	gliogenesis	5	6.57895	0.00756829	ENSG00000105894, ENSG00000105227, ENSG00000183691, ENSG00000176749, ENSG00000157227	49	313	19277	6.28448	1
GO TERM: BP	GO:0043067~regulation of programmed cell death	GO:0043067	regulation of programmed cell death	11	14.4737	0.00772233	ENSG00000105894, ENSG00000207607, ENSG00000074317, ENSG00000183691, ENSG00000207864, ENSG00000181284, ENSG00000205155, ENSG00000175567, ENSG00000176749, ENSG00000140961, ENSG00000176170	49	1688	19277	2.56368	1
GO TERM: BP	GO:0030902~hindbrain development	GO:0030902	hindbrain development	4	5.26316	0.00790083	ENSG00000105894, ENSG00000183691, ENSG00000176749, ENSG00000184524	49	164	19277	9.59532	1
GO TERM: BP	GO:0006915~apoptotic process	GO:0006915	apoptotic process	12	15.7895	0.00806238	ENSG00000105894, ENSG00000207607, ENSG00000074317, ENSG00000183691, ENSG00000207864, ENSG00000181284, ENSG00000205155, ENSG00000175567, ENSG00000176749, ENSG00000171246, ENSG00000140961, ENSG00000176170	49	1975	19277	2.39033	1
GO TERM: BP	GO:0060341~regulation of cellular localization	GO:0060341	regulation of cellular localization	8	10.5263	0.0113467	ENSG00000105894, ENSG00000104369, ENSG00000207864, ENSG00000175567, ENSG00000213977, ENSG00000176749, ENSG00000150551, ENSG00000157227	49	1000	19277	3.14727	1
GO TERM: BP	GO:0010942~positive regulation of cell death	GO:0010942	positive regulation of cell death	7	9.21053	0.0120692	ENSG00000105894, ENSG00000207607, ENSG00000207864, ENSG00000205155, ENSG00000175567, ENSG00000176749, ENSG00000140961	49	775	19277	3.55336	1
GO TERM: BP	GO:0021578~hindbrain maturation	GO:0021578	hindbrain maturation	2	2.63158	0.0123895	ENSG00000176749, ENSG00000184524	49	5	19277	157.363	1
GO TERM: BP	GO:0030334~regulation of cell migration	GO:0030334	regulation of cell migration	8	10.5263	0.0126211	ENSG00000105894, ENSG00000207607, ENSG00000183691, ENSG00000207864, ENSG00000181284, ENSG00000140961, ENSG00000176170, ENSG00000157227	49	1021	19277	3.08253	1
GO TERM: BP	GO:1905475~regulation of protein localization to membrane	GO:1905475	regulation of protein localization to membrane	4	5.26316	0.0133308	ENSG00000105894, ENSG00000176749, ENSG00000150551, ENSG00000157227	49	199	19277	7.9077	1
GO TERM: BP	GO:0010941~regulation of cell death	GO:0010941	regulation of cell death	11	14.4737	0.0139185	ENSG00000105894, ENSG00000207607, ENSG00000074317, ENSG00000183691, ENSG00000207864, ENSG00000181284, ENSG00000205155, ENSG00000175567, ENSG00000176749, ENSG00000140961, ENSG00000176170	49	1843	19277	2.34807	1
GO TERM: BP	GO:1990349~gap junction-mediated intercellular transport	GO:1990349	gap junction-mediated intercellular transport	2	2.63158	0.0148493	ENSG00000165474, ENSG00000121743	49	6	19277	131.136	1
GO TERM: BP	GO:1902585~single-organism intercellular transport	GO:1902585	single-organism intercellular transport	2	2.63158	0.0148493	ENSG00000165474, ENSG00000121743	49	6	19277	131.136	1
GO TERM: BP	GO:0030335~positive regulation of cell migration	GO:0030335	positive regulation of cell migration	6	7.89474	0.0150972	ENSG00000105894, ENSG00000207607, ENSG00000207864, ENSG00000181284, ENSG00000176170, ENSG00000157227	49	588	19277	4.01437	1
GO TERM: CC	GO:0031594~neuromuscular junction	GO:0031594	neuromuscular junction	3	3.94737	0.0158257	ENSG00000105894, ENSG00000176749, ENSG00000162520	44	77	17223	15.2506	1
GO TERM: BP	GO:0021626~central nervous system maturation	GO:0021626	central nervous system maturation	2	2.63158	0.0173031	ENSG00000176749, ENSG00000184524	49	7	19277	112.402	1
GO TERM: BP	GO:0010496~intercellular transport	GO:0010496	intercellular transport	2	2.63158	0.0173031	ENSG00000165474, ENSG00000121743	49	7	19277	112.402	1
GO TERM: BP	GO:2000145~regulation of cell motility	GO:2000145	regulation of cell motility	8	10.5263	0.0176252	ENSG00000105894, ENSG00000207607, ENSG00000183691, ENSG00000207864, ENSG00000181284, ENSG00000140961, ENSG00000176170, ENSG00000157227	49	1091	19277	2.88475	1
GO TERM: BP	GO:2000147~positive regulation of cell motility	GO:2000147	positive regulation of cell motility	6	7.89474	0.0179939	ENSG00000105894, ENSG00000207607, ENSG00000207864, ENSG00000181284, ENSG00000176170, ENSG00000157227	49	615	19277	3.83813	1
GO TERM: MF	GO:0098772~molecular function regulator	GO:0098772	molecular function regulator	9	11.8421	0.0180545	ENSG00000105894, ENSG00000074317, ENSG00000105711, ENSG00000205155, ENSG00000130052, ENSG00000176749, ENSG00000150551, ENSG00000168517, ENSG00000185614	38	1551	16739	2.55609	1
GO TERM: BP	GO:0012501~programmed cell death	GO:0012501	programmed cell death	12	15.7895	0.0181379	ENSG00000105894, ENSG00000207607, ENSG00000074317, ENSG00000183691, ENSG00000207864, ENSG00000181284, ENSG00000205155, ENSG00000175567, ENSG00000176749, ENSG00000171246, ENSG00000140961, ENSG00000176170	49	2214	19277	2.13229	1
GO TERM: BP	GO:0051272~positive regulation of cellular component movement	GO:0051272	positive regulation of cellular component movement	6	7.89474	0.019996	ENSG00000105894, ENSG00000207607, ENSG00000207864, ENSG00000181284, ENSG00000176170, ENSG00000157227	49	632	19277	3.73489	1
GO TERM: BP	GO:0010469~regulation of receptor activity	GO:0010469	regulation of receptor activity	4	5.26316	0.0211442	ENSG00000104369, ENSG00000176749, ENSG00000171246, ENSG00000150551	49	237	19277	6.6398	1
GO TERM: BP	GO:0040017~positive regulation of locomotion	GO:0040017	positive regulation of locomotion	6	7.89474	0.0218807	ENSG00000105894, ENSG00000207607, ENSG00000207864, ENSG00000181284, ENSG00000176170, ENSG00000157227	49	647	19277	3.6483	1
GO TERM: BP	GO:0010033~response to organic substance	GO:0010033	response to organic substance	16	21.0526	0.0234378	ENSG00000105894, ENSG00000095752, ENSG00000125571, ENSG00000181284, ENSG00000205220, ENSG00000175567, ENSG00000176749, ENSG00000171246, ENSG00000150551, ENSG00000157227, ENSG00000207607, ENSG00000277117, ENSG00000165474, ENSG00000183691, ENSG00000207864, ENSG00000176170	49	3572	19277	1.76219	1
GO TERM: BP	GO:0040012~regulation of locomotion	GO:0040012	regulation of locomotion	8	10.5263	0.0249204	ENSG00000105894, ENSG00000207607, ENSG00000183691, ENSG00000207864, ENSG00000181284, ENSG00000140961, ENSG00000176170, ENSG00000157227	49	1171	19277	2.68767	1
GO TERM: BP	GO:0051270~regulation of cellular component movement	GO:0051270	regulation of cellular component movement	8	10.5263	0.0259606	ENSG00000105894, ENSG00000207607, ENSG00000183691, ENSG00000207864, ENSG00000181284, ENSG00000140961, ENSG00000176170, ENSG00000157227	49	1181	19277	2.66492	1
GO TERM: BP	GO:2000027~regulation of organ morphogenesis	GO:2000027	regulation of organ morphogenesis	4	5.26316	0.0268663	ENSG00000105894, ENSG00000189120, ENSG00000183691, ENSG00000205220	49	260	19277	6.05243	1
GO TERM: BP	GO:0065009~regulation of molecular function	GO:0065009	regulation of molecular function	15	19.7368	0.0268959	ENSG00000105894, ENSG00000074317, ENSG00000104369, ENSG00000105711, ENSG00000205155, ENSG00000213977, ENSG00000130052, ENSG00000176749, ENSG00000171246, ENSG00000150551, ENSG00000183691, ENSG00000207864, ENSG00000168517, ENSG00000176170, ENSG00000185614	49	3301	19277	1.78768	1
GO TERM: BP	GO:0008219~cell death	GO:0008219	cell death	12	15.7895	0.0288678	ENSG00000105894, ENSG00000207607, ENSG00000074317, ENSG00000183691, ENSG00000207864, ENSG00000181284, ENSG00000205155, ENSG00000175567, ENSG00000176749, ENSG00000171246, ENSG00000140961, ENSG00000176170	49	2373	19277	1.98942	1
GO TERM: BP	GO:0043065~positive regulation of apoptotic process	GO:0043065	positive regulation of apoptotic process	6	7.89474	0.0299352	ENSG00000105894, ENSG00000207607, ENSG00000207864, ENSG00000205155, ENSG00000176749, ENSG00000140961	49	703	19277	3.35768	1
GO TERM: BP	GO:0021549~cerebellum development	GO:0021549	cerebellum development	3	3.94737	0.0301824	ENSG00000105894, ENSG00000176749, ENSG00000184524	49	109	19277	10.8277	1
GO TERM: BP	GO:0072657~protein localization to membrane	GO:0072657	protein localization to membrane	6	7.89474	0.0302535	ENSG00000105894, ENSG00000274012, ENSG00000176749, ENSG00000171246, ENSG00000150551, ENSG00000157227	49	705	19277	3.34815	1
GO TERM: BP	GO:0043068~positive regulation of programmed cell death	GO:0043068	positive regulation of programmed cell death	6	7.89474	0.0312211	ENSG00000105894, ENSG00000207607, ENSG00000207864, ENSG00000205155, ENSG00000176749, ENSG00000140961	49	711	19277	3.3199	1
GO TERM: BP	GO:1901700~response to oxygen-containing compound	GO:1901700	response to oxygen-containing compound	10	13.1579	0.0321157	ENSG00000105894, ENSG00000207607, ENSG00000165474, ENSG00000277117, ENSG00000125571, ENSG00000175567, ENSG00000176749, ENSG00000171246, ENSG00000150551, ENSG00000176170	49	1805	19277	2.17955	1
GO TERM: BP	GO:0051641~cellular localization	GO:0051641	cellular localization	14	18.4211	0.0335125	ENSG00000105894, ENSG00000074317, ENSG00000104369, ENSG00000175567, ENSG00000213977, ENSG00000204442, ENSG00000176749, ENSG00000171246, ENSG00000150551, ENSG00000157227, ENSG00000175906, ENSG00000274012, ENSG00000207864, ENSG00000149489	49	3067	19277	1.7958	1
GO TERM: BP	GO:0022037~metencephalon development	GO:0022037	metencephalon development	3	3.94737	0.0349029	ENSG00000105894, ENSG00000176749, ENSG00000184524	49	118	19277	10.0019	1
GO TERM: BP	GO:0040011~locomotion	GO:0040011	locomotion	11	14.4737	0.0373222	ENSG00000105894, ENSG00000207607, ENSG00000105711, ENSG00000183691, ENSG00000207864, ENSG00000181284, ENSG00000176749, ENSG00000184524, ENSG00000140961, ENSG00000176170, ENSG00000157227	49	2158	19277	2.00532	1
GO TERM: MF	GO:0030234~enzyme regulator activity	GO:0030234	enzyme regulator activity	7	9.21053	0.0377089	ENSG00000105894, ENSG00000074317, ENSG00000205155, ENSG00000130052, ENSG00000176749, ENSG00000168517, ENSG00000185614	38	1143	16739	2.69773	1
GO TERM: BP	GO:1900121~negative regulation of receptor binding	GO:1900121	negative regulation of receptor binding	2	2.63158	0.0391197	ENSG00000183691, ENSG00000207864	49	16	19277	49.176	1
GO TERM: BP	GO:0070887~cellular response to chemical stimulus	GO:0070887	cellular response to chemical stimulus	15	19.7368	0.039138	ENSG00000105894, ENSG00000095752, ENSG00000125571, ENSG00000181284, ENSG00000205220, ENSG00000175567, ENSG00000176749, ENSG00000171246, ENSG00000150551, ENSG00000207607, ENSG00000277117, ENSG00000165474, ENSG00000183691, ENSG00000207864, ENSG00000176170	49	3466	19277	1.70257	1
GO TERM: BP	GO:0051674~localization of cell	GO:0051674	localization of cell	10	13.1579	0.0424947	ENSG00000105894, ENSG00000207607, ENSG00000183691, ENSG00000207864, ENSG00000181284, ENSG00000176749, ENSG00000184524, ENSG00000140961, ENSG00000176170, ENSG00000157227	49	1899	19277	2.07166	1
GO TERM: BP	GO:0048870~cell motility	GO:0048870	cell motility	10	13.1579	0.0424947	ENSG00000105894, ENSG00000207607, ENSG00000183691, ENSG00000207864, ENSG00000181284, ENSG00000176749, ENSG00000184524, ENSG00000140961, ENSG00000176170, ENSG00000157227	49	1899	19277	2.07166	1
GO TERM: BP	GO:0051961~negative regulation of nervous system development	GO:0051961	negative regulation of nervous system development	4	5.26316	0.0460038	ENSG00000105894, ENSG00000183691, ENSG00000176749, ENSG00000184524	49	322	19277	4.88706	1
GO TERM: BP	GO:0061564~axon development	GO:0061564	axon development	5	6.57895	0.0467717	ENSG00000105894, ENSG00000105711, ENSG00000183691, ENSG00000176749, ENSG00000171246	49	547	19277	3.59605	1
GO TERM: MF	GO:0005243~gap junction channel activity	GO:0005243	gap junction channel activity	2	2.63158	0.0475459	ENSG00000165474, ENSG00000121743	38	22	16739	40.0455	1
GO TERM: BP	GO:0007417~central nervous system development	GO:0007417	central nervous system development	7	9.21053	0.0492464	ENSG00000105894, ENSG00000105711, ENSG00000183691, ENSG00000176749, ENSG00000184524, ENSG00000171246, ENSG00000176170	49	1074	19277	2.56411	1

## Sheet: Reactome
Category	Term	ID	Pathway	Count	%	PValue	Genes	List Total	Pop Hits	Pop Total	Fold Enrichment	Benjamini padj
REACTOME_PATHWAY	R-HSA-9675108~Nervous system development	R-HSA-9675108	Nervous system development	5	6.57895	0.0394975	ENSG00000105711, ENSG00000105227, ENSG00000205155, ENSG00000205220, ENSG00000176749	25	577	10538	3.65269	1
REACTOME_PATHWAY	R-HSA-190861~Gap junction assembly	R-HSA-190861	Gap junction assembly	2	2.63158	0.07893	ENSG00000165474, ENSG00000121743	25	36	10538	23.4178	1
