# Supplementary material for: Culture of Cancer Cells at Physiological Oxygen Levels Affects Gene Expression in a Cell-Type Specific Manner
Source: Preprints.org preprint supplement (doi:10.20944/preprints202208.0497.v1), 2022-08-29
Supplement: Supplementary file 4 [file Table S11 Functional Enrichent SH-SY5Y 5% O2.xlsx]

## Sheet: GO
Category	Term	ID	Name	Count	%	PValue	Genes	List Total	Pop Hits	Pop Total	Fold Enrichment	Benjamini padj
GO TERM: BP	GO:0015980~energy derivation by oxidation of organic compounds	GO:0015980	energy derivation by oxidation of organic compounds	8	5.16129	6.58642e-05	ENSG00000129993, ENSG00000163794, ENSG00000198695, ENSG00000167244, ENSG00000198840, ENSG00000119938, ENSG00000198786, ENSG00000175701	67	295	19277	7.80248	0.109796
GO TERM: CC	GO:0005743~mitochondrial inner membrane	GO:0005743	mitochondrial inner membrane	8	5.16129	0.00130928	ENSG00000237289, ENSG00000204822, ENSG00000162461, ENSG00000198695, ENSG00000198840, ENSG00000228253, ENSG00000198786, ENSG00000175701	57	513	17223	4.71201	0.143935
GO TERM: CC	GO:0044455~mitochondrial membrane part	GO:0044455	mitochondrial membrane part	6	3.87097	0.00178594	ENSG00000198695, ENSG00000198840, ENSG00000115657, ENSG00000228253, ENSG00000198786, ENSG00000175701	57	269	17223	6.73958	0.143935
GO TERM: CC	GO:0005730~nucleolus	GO:0005730	nucleolus	13	8.3871	0.00207146	ENSG00000129993, ENSG00000209482, ENSG00000199266, ENSG00000208772, ENSG00000241370, ENSG00000202314, ENSG00000207217, ENSG00000201457, ENSG00000201512, ENSG00000206897, ENSG00000106133, ENSG00000212493, ENSG00000206838	57	1450	17223	2.709	0.143935
GO TERM: CC	GO:0019866~organelle inner membrane	GO:0019866	organelle inner membrane	8	5.16129	0.00250322	ENSG00000237289, ENSG00000204822, ENSG00000162461, ENSG00000198695, ENSG00000198840, ENSG00000228253, ENSG00000198786, ENSG00000175701	57	575	17223	4.20394	0.143935
GO TERM: CC	GO:0031966~mitochondrial membrane	GO:0031966	mitochondrial membrane	9	5.80645	0.00347798	ENSG00000237289, ENSG00000204822, ENSG00000162461, ENSG00000198695, ENSG00000198840, ENSG00000115657, ENSG00000228253, ENSG00000198786, ENSG00000175701	57	778	17223	3.4954	0.159987
GO TERM: CC	GO:0005740~mitochondrial envelope	GO:0005740	mitochondrial envelope	9	5.80645	0.00513407	ENSG00000237289, ENSG00000204822, ENSG00000162461, ENSG00000198695, ENSG00000198840, ENSG00000115657, ENSG00000228253, ENSG00000198786, ENSG00000175701	57	830	17223	3.27641	0.196806
GO TERM: CC	GO:0000786~nucleosome	GO:0000786	nucleosome	4	2.58065	0.0094527	ENSG00000273802, ENSG00000203814, ENSG00000277157, ENSG00000273983	57	134	17223	9.01964	0.240676
GO TERM: CC	GO:0044815~DNA packaging complex	GO:0044815	DNA packaging complex	4	2.58065	0.01106	ENSG00000273802, ENSG00000203814, ENSG00000277157, ENSG00000273983	57	142	17223	8.51149	0.240676
GO TERM: CC	GO:0005747~mitochondrial respiratory chain complex I	GO:0005747	mitochondrial respiratory chain complex I	3	1.93548	0.0115106	ENSG00000198695, ENSG00000198840, ENSG00000198786	57	50	17223	18.1295	0.240676
GO TERM: CC	GO:0030964~NADH dehydrogenase complex	GO:0030964	NADH dehydrogenase complex	3	1.93548	0.0115106	ENSG00000198695, ENSG00000198840, ENSG00000198786	57	50	17223	18.1295	0.240676
GO TERM: CC	GO:0045271~respiratory chain complex I	GO:0045271	respiratory chain complex I	3	1.93548	0.0115106	ENSG00000198695, ENSG00000198840, ENSG00000198786	57	50	17223	18.1295	0.240676
GO TERM: CC	GO:0098800~inner mitochondrial membrane protein complex	GO:0098800	inner mitochondrial membrane protein complex	4	2.58065	0.0125886	ENSG00000198695, ENSG00000198840, ENSG00000228253, ENSG00000198786	57	149	17223	8.11162	0.241281
GO TERM: CC	GO:0098798~mitochondrial protein complex	GO:0098798	mitochondrial protein complex	4	2.58065	0.0222952	ENSG00000198695, ENSG00000198840, ENSG00000228253, ENSG00000198786	57	185	17223	6.53314	0.394454
GO TERM: CC	GO:0044429~mitochondrial part	GO:0044429	mitochondrial part	9	5.80645	0.0304335	ENSG00000237289, ENSG00000204822, ENSG00000162461, ENSG00000198695, ENSG00000198840, ENSG00000115657, ENSG00000228253, ENSG00000198786, ENSG00000175701	57	1142	17223	2.38128	0.49998
GO TERM: BP	GO:0045333~cellular respiration	GO:0045333	cellular respiration	6	3.87097	0.00061174	ENSG00000129993, ENSG00000163794, ENSG00000198695, ENSG00000198840, ENSG00000198786, ENSG00000175701	67	200	19277	8.63149	0.509885
GO TERM: MF	GO:1903231~mRNA binding involved in posttranscriptional gene silencing	GO:1903231	mRNA binding involved in posttranscriptional gene silencing	5	3.22581	0.00701116	ENSG00000207805, ENSG00000207547, ENSG00000207721, ENSG00000207744, ENSG00000207741	49	266	16739	6.42128	0.512734
GO TERM: MF	GO:0008137~NADH dehydrogenase (ubiquinone) activity	GO:0008137	NADH dehydrogenase (ubiquinone) activity	3	1.93548	0.00769028	ENSG00000198695, ENSG00000198840, ENSG00000198786	49	46	16739	22.2791	0.512734
GO TERM: MF	GO:0050136~NADH dehydrogenase (quinone) activity	GO:0050136	NADH dehydrogenase (quinone) activity	3	1.93548	0.00801747	ENSG00000198695, ENSG00000198840, ENSG00000198786	49	47	16739	21.805	0.512734
GO TERM: MF	GO:0003954~NADH dehydrogenase activity	GO:0003954	NADH dehydrogenase activity	3	1.93548	0.0086904	ENSG00000198695, ENSG00000198840, ENSG00000198786	49	49	16739	20.915	0.512734
GO TERM: CC	GO:0098803~respiratory chain complex	GO:0098803	respiratory chain complex	3	1.93548	0.0360724	ENSG00000198695, ENSG00000198840, ENSG00000198786	57	92	17223	9.85297	0.548456
GO TERM: CC	GO:0005746~mitochondrial respiratory chain	GO:0005746	mitochondrial respiratory chain	3	1.93548	0.0389745	ENSG00000198695, ENSG00000198840, ENSG00000198786	57	96	17223	9.44243	0.548456
GO TERM: CC	GO:0032993~protein-DNA complex	GO:0032993	protein-DNA complex	4	2.58065	0.040538	ENSG00000273802, ENSG00000203814, ENSG00000277157, ENSG00000273983	57	234	17223	5.16509	0.548456
GO TERM: CC	GO:0070469~respiratory chain	GO:0070469	respiratory chain	3	1.93548	0.0450346	ENSG00000198695, ENSG00000198840, ENSG00000198786	57	104	17223	8.71609	0.575442
GO TERM: CC	GO:0005739~mitochondrion	GO:0005739	mitochondrion	11	7.09677	0.0535846	ENSG00000237289, ENSG00000204822, ENSG00000162461, ENSG00000198695, ENSG00000188277, ENSG00000198840, ENSG00000115657, ENSG00000228253, ENSG00000170917, ENSG00000198786, ENSG00000175701	57	1749	17223	1.90036	0.607087
GO TERM: CC	GO:0031967~organelle envelope	GO:0031967	organelle envelope	9	5.80645	0.0554296	ENSG00000237289, ENSG00000204822, ENSG00000162461, ENSG00000198695, ENSG00000198840, ENSG00000115657, ENSG00000228253, ENSG00000198786, ENSG00000175701	57	1288	17223	2.11135	0.607087
GO TERM: CC	GO:0031975~envelope	GO:0031975	envelope	9	5.80645	0.0554296	ENSG00000237289, ENSG00000204822, ENSG00000162461, ENSG00000198695, ENSG00000198840, ENSG00000115657, ENSG00000228253, ENSG00000198786, ENSG00000175701	57	1288	17223	2.11135	0.607087
GO TERM: CC	GO:1990204~oxidoreductase complex	GO:1990204	oxidoreductase complex	3	1.93548	0.0606888	ENSG00000198695, ENSG00000198840, ENSG00000198786	57	123	17223	7.3697	0.634474
GO TERM: MF	GO:0016655~oxidoreductase activity, acting on NAD(P)H, quinone or similar compound as acceptor	GO:0016655	oxidoreductase activity, acting on NAD(P)H, quinone or similar compound as acceptor	3	1.93548	0.0136481	ENSG00000198695, ENSG00000198840, ENSG00000198786	49	62	16739	16.5296	0.644192
GO TERM: BP	GO:0006091~generation of precursor metabolites and energy	GO:0006091	generation of precursor metabolites and energy	8	5.16129	0.00155571	ENSG00000129993, ENSG00000163794, ENSG00000198695, ENSG00000167244, ENSG00000198840, ENSG00000119938, ENSG00000198786, ENSG00000175701	67	499	19277	4.61269	0.72972
GO TERM: BP	GO:0006334~nucleosome assembly	GO:0006334	nucleosome assembly	5	3.22581	0.0018325	ENSG00000273802, ENSG00000175279, ENSG00000203814, ENSG00000277157, ENSG00000273983	67	152	19277	9.46436	0.72972
GO TERM: BP	GO:0055114~oxidation-reduction process	GO:0055114	oxidation-reduction process	8	5.16129	0.00218872	ENSG00000129993, ENSG00000163794, ENSG00000198695, ENSG00000167244, ENSG00000198840, ENSG00000119938, ENSG00000198786, ENSG00000175701	67	530	19277	4.34289	0.72972
GO TERM: MF	GO:0046982~protein heterodimerization activity	GO:0046982	protein heterodimerization activity	5	3.22581	0.0212894	ENSG00000273802, ENSG00000175279, ENSG00000203814, ENSG00000277157, ENSG00000273983	49	370	16739	4.61638	0.837381
GO TERM: BP	GO:0031497~chromatin assembly	GO:0031497	chromatin assembly	5	3.22581	0.00394291	ENSG00000273802, ENSG00000175279, ENSG00000203814, ENSG00000277157, ENSG00000273983	67	188	19277	7.65203	1
GO TERM: BP	GO:0040029~regulation of gene expression, epigenetic	GO:0040029	regulation of gene expression, epigenetic	10	6.45161	0.00447392	ENSG00000207805, ENSG00000253522, ENSG00000207547, ENSG00000167244, ENSG00000207721, ENSG00000207744, ENSG00000207741, ENSG00000229807, ENSG00000277157, ENSG00000273983	67	937	19277	3.07061	1
GO TERM: BP	GO:0034728~nucleosome organization	GO:0034728	nucleosome organization	5	3.22581	0.00592199	ENSG00000273802, ENSG00000175279, ENSG00000203814, ENSG00000277157, ENSG00000273983	67	211	19277	6.81792	1
GO TERM: BP	GO:0006333~chromatin assembly or disassembly	GO:0006333	chromatin assembly or disassembly	5	3.22581	0.00612025	ENSG00000273802, ENSG00000175279, ENSG00000203814, ENSG00000277157, ENSG00000273983	67	213	19277	6.75391	1
GO TERM: BP	GO:0010467~gene expression	GO:0010467	gene expression	35	22.5806	0.00702104	ENSG00000209482, ENSG00000211962, ENSG00000207741, ENSG00000208772, ENSG00000213928, ENSG00000241370, ENSG00000244560, ENSG00000154545, ENSG00000202314, ENSG00000207805, ENSG00000228049, ENSG00000253522, ENSG00000207547, ENSG00000167244, ENSG00000207721, ENSG00000206897, ENSG00000207744, ENSG00000212493, ENSG00000169627, ENSG00000277157, ENSG00000206838, ENSG00000182986, ENSG00000129993, ENSG0000…	67	6942	19277	1.4506	1
GO TERM: BP	GO:0006323~DNA packaging	GO:0006323	DNA packaging	5	3.22581	0.00950762	ENSG00000273802, ENSG00000175279, ENSG00000203814, ENSG00000277157, ENSG00000273983	67	242	19277	5.94455	1
GO TERM: BP	GO:0016441~posttranscriptional gene silencing	GO:0016441	posttranscriptional gene silencing	8	5.16129	0.0129757	ENSG00000207805, ENSG00000253522, ENSG00000207547, ENSG00000207721, ENSG00000207744, ENSG00000207741, ENSG00000277157, ENSG00000273983	67	739	19277	3.11466	1
GO TERM: BP	GO:0006396~RNA processing	GO:0006396	RNA processing	12	7.74194	0.0139283	ENSG00000202314, ENSG00000209482, ENSG00000207217, ENSG00000201457, ENSG00000201512, ENSG00000199266, ENSG00000206897, ENSG00000212493, ENSG00000106133, ENSG00000241370, ENSG00000208772, ENSG00000206838	67	1526	19277	2.26251	1
GO TERM: BP	GO:0031047~gene silencing by RNA	GO:0031047	gene silencing by RNA	8	5.16129	0.0156394	ENSG00000207805, ENSG00000253522, ENSG00000207547, ENSG00000207721, ENSG00000207744, ENSG00000207741, ENSG00000277157, ENSG00000273983	67	767	19277	3.00095	1
GO TERM: BP	GO:0006120~mitochondrial electron transport, NADH to ubiquinone	GO:0006120	mitochondrial electron transport, NADH to ubiquinone	3	1.93548	0.0157864	ENSG00000198695, ENSG00000198840, ENSG00000198786	67	56	19277	15.4134	1
GO TERM: BP	GO:0010675~regulation of cellular carbohydrate metabolic process	GO:0010675	regulation of cellular carbohydrate metabolic process	4	2.58065	0.0190132	ENSG00000129993, ENSG00000167244, ENSG00000119938, ENSG00000167701	67	165	19277	6.97494	1
GO TERM: BP	GO:0065004~protein-DNA complex assembly	GO:0065004	protein-DNA complex assembly	5	3.22581	0.0228335	ENSG00000273802, ENSG00000175279, ENSG00000203814, ENSG00000277157, ENSG00000273983	67	315	19277	4.56693	1
GO TERM: BP	GO:0010257~NADH dehydrogenase complex assembly	GO:0010257	NADH dehydrogenase complex assembly	3	1.93548	0.0240108	ENSG00000198695, ENSG00000198840, ENSG00000198786	67	70	19277	12.3307	1
GO TERM: BP	GO:0032981~mitochondrial respiratory chain complex I assembly	GO:0032981	mitochondrial respiratory chain complex I assembly	3	1.93548	0.0240108	ENSG00000198695, ENSG00000198840, ENSG00000198786	67	70	19277	12.3307	1
GO TERM: BP	GO:0097031~mitochondrial respiratory chain complex I biogenesis	GO:0097031	mitochondrial respiratory chain complex I biogenesis	3	1.93548	0.0240108	ENSG00000198695, ENSG00000198840, ENSG00000198786	67	70	19277	12.3307	1
GO TERM: BP	GO:0001936~regulation of endothelial cell proliferation	GO:0001936	regulation of endothelial cell proliferation	4	2.58065	0.0248879	ENSG00000207805, ENSG00000167244, ENSG00000207744, ENSG00000117525	67	183	19277	6.28888	1
GO TERM: BP	GO:0046034~ATP metabolic process	GO:0046034	ATP metabolic process	5	3.22581	0.0257471	ENSG00000129993, ENSG00000198695, ENSG00000198840, ENSG00000228253, ENSG00000198786	67	327	19277	4.39933	1
GO TERM: BP	GO:0001935~endothelial cell proliferation	GO:0001935	endothelial cell proliferation	4	2.58065	0.0296734	ENSG00000207805, ENSG00000167244, ENSG00000207744, ENSG00000117525	67	196	19277	5.87176	1
GO TERM: BP	GO:0006417~regulation of translation	GO:0006417	regulation of translation	9	5.80645	0.0298288	ENSG00000207805, ENSG00000163794, ENSG00000253522, ENSG00000207547, ENSG00000207721, ENSG00000207744, ENSG00000207741, ENSG00000277157, ENSG00000273983	67	1075	19277	2.40879	1
GO TERM: BP	GO:0016458~gene silencing	GO:0016458	gene silencing	8	5.16129	0.0300832	ENSG00000207805, ENSG00000253522, ENSG00000207547, ENSG00000207721, ENSG00000207744, ENSG00000207741, ENSG00000277157, ENSG00000273983	67	878	19277	2.62156	1
GO TERM: BP	GO:0009205~purine ribonucleoside triphosphate metabolic process	GO:0009205	purine ribonucleoside triphosphate metabolic process	5	3.22581	0.0342762	ENSG00000129993, ENSG00000198695, ENSG00000198840, ENSG00000228253, ENSG00000198786	67	358	19277	4.01839	1
GO TERM: BP	GO:0071103~DNA conformation change	GO:0071103	DNA conformation change	5	3.22581	0.0345757	ENSG00000273802, ENSG00000175279, ENSG00000203814, ENSG00000277157, ENSG00000273983	67	359	19277	4.00719	1
GO TERM: BP	GO:0009144~purine nucleoside triphosphate metabolic process	GO:0009144	purine nucleoside triphosphate metabolic process	5	3.22581	0.0357891	ENSG00000129993, ENSG00000198695, ENSG00000198840, ENSG00000228253, ENSG00000198786	67	363	19277	3.96304	1
GO TERM: BP	GO:0009199~ribonucleoside triphosphate metabolic process	GO:0009199	ribonucleoside triphosphate metabolic process	5	3.22581	0.036405	ENSG00000129993, ENSG00000198695, ENSG00000198840, ENSG00000228253, ENSG00000198786	67	365	19277	3.94132	1
GO TERM: MF	GO:1901363~heterocyclic compound binding	GO:1901363	heterocyclic compound binding	26	16.7742	0.0364104	ENSG00000266714, ENSG00000115657, ENSG00000207741, ENSG00000181085, ENSG00000213928, ENSG00000241370, ENSG00000207805, ENSG00000228049, ENSG00000207547, ENSG00000207721, ENSG00000207744, ENSG00000277157, ENSG00000143674, ENSG00000167524, ENSG00000182986, ENSG00000167701, ENSG00000237289, ENSG00000075886, ENSG00000175279, ENSG00000130684, ENSG00000273802, ENSG00000170917, ENSG00000106133, ENSG0000…	49	6418	16739	1.38391	1
GO TERM: BP	GO:0034622~cellular macromolecular complex assembly	GO:0034622	cellular macromolecular complex assembly	10	6.45161	0.0365471	ENSG00000198695, ENSG00000188277, ENSG00000198840, ENSG00000273802, ENSG00000167371, ENSG00000198786, ENSG00000175279, ENSG00000203814, ENSG00000277157, ENSG00000273983	67	1329	19277	2.16491	1
GO TERM: BP	GO:0006518~peptide metabolic process	GO:0006518	peptide metabolic process	11	7.09677	0.0379137	ENSG00000204822, ENSG00000207805, ENSG00000163794, ENSG00000253522, ENSG00000207547, ENSG00000099984, ENSG00000207721, ENSG00000207744, ENSG00000207741, ENSG00000277157, ENSG00000273983	67	1555	19277	2.03529	1
GO TERM: BP	GO:0006412~translation	GO:0006412	translation	10	6.45161	0.0380672	ENSG00000204822, ENSG00000207805, ENSG00000163794, ENSG00000253522, ENSG00000207547, ENSG00000207721, ENSG00000207744, ENSG00000207741, ENSG00000277157, ENSG00000273983	67	1339	19277	2.14874	1
GO TERM: BP	GO:0009167~purine ribonucleoside monophosphate metabolic process	GO:0009167	purine ribonucleoside monophosphate metabolic process	5	3.22581	0.0382897	ENSG00000129993, ENSG00000198695, ENSG00000198840, ENSG00000228253, ENSG00000198786	67	371	19277	3.87758	1
GO TERM: BP	GO:0009126~purine nucleoside monophosphate metabolic process	GO:0009126	purine nucleoside monophosphate metabolic process	5	3.22581	0.0382897	ENSG00000129993, ENSG00000198695, ENSG00000198840, ENSG00000228253, ENSG00000198786	67	371	19277	3.87758	1
GO TERM: BP	GO:0071824~protein-DNA complex subunit organization	GO:0071824	protein-DNA complex subunit organization	5	3.22581	0.0389302	ENSG00000273802, ENSG00000175279, ENSG00000203814, ENSG00000277157, ENSG00000273983	67	373	19277	3.85679	1
GO TERM: MF	GO:0016651~oxidoreductase activity, acting on NAD(P)H	GO:0016651	oxidoreductase activity, acting on NAD(P)H	3	1.93548	0.0390264	ENSG00000198695, ENSG00000198840, ENSG00000198786	49	109	16739	9.40217	1
GO TERM: BP	GO:0034248~regulation of cellular amide metabolic process	GO:0034248	regulation of cellular amide metabolic process	9	5.80645	0.0396258	ENSG00000207805, ENSG00000163794, ENSG00000253522, ENSG00000207547, ENSG00000207721, ENSG00000207744, ENSG00000207741, ENSG00000277157, ENSG00000273983	67	1137	19277	2.27744	1
GO TERM: BP	GO:0040033~negative regulation of translation, ncRNA-mediated	GO:0040033	negative regulation of translation, ncRNA-mediated	3	1.93548	0.0404597	ENSG00000207805, ENSG00000207744, ENSG00000207741	67	93	19277	9.28117	1
GO TERM: BP	GO:0035278~miRNA mediated inhibition of translation	GO:0035278	miRNA mediated inhibition of translation	3	1.93548	0.0404597	ENSG00000207805, ENSG00000207744, ENSG00000207741	67	93	19277	9.28117	1
GO TERM: BP	GO:0045974~regulation of translation, ncRNA-mediated	GO:0045974	regulation of translation, ncRNA-mediated	3	1.93548	0.0404597	ENSG00000207805, ENSG00000207744, ENSG00000207741	67	93	19277	9.28117	1
GO TERM: BP	GO:0009141~nucleoside triphosphate metabolic process	GO:0009141	nucleoside triphosphate metabolic process	5	3.22581	0.0422255	ENSG00000129993, ENSG00000198695, ENSG00000198840, ENSG00000228253, ENSG00000198786	67	383	19277	3.75609	1
GO TERM: BP	GO:0043043~peptide biosynthetic process	GO:0043043	peptide biosynthetic process	10	6.45161	0.042722	ENSG00000204822, ENSG00000207805, ENSG00000163794, ENSG00000253522, ENSG00000207547, ENSG00000207721, ENSG00000207744, ENSG00000207741, ENSG00000277157, ENSG00000273983	67	1368	19277	2.10319	1
GO TERM: MF	GO:0097159~organic cyclic compound binding	GO:0097159	organic cyclic compound binding	26	16.7742	0.0428601	ENSG00000266714, ENSG00000115657, ENSG00000207741, ENSG00000181085, ENSG00000213928, ENSG00000241370, ENSG00000207805, ENSG00000228049, ENSG00000207547, ENSG00000207721, ENSG00000207744, ENSG00000277157, ENSG00000143674, ENSG00000167524, ENSG00000182986, ENSG00000167701, ENSG00000237289, ENSG00000075886, ENSG00000175279, ENSG00000130684, ENSG00000273802, ENSG00000170917, ENSG00000106133, ENSG0000…	49	6505	16739	1.3654	1
GO TERM: BP	GO:0006109~regulation of carbohydrate metabolic process	GO:0006109	regulation of carbohydrate metabolic process	4	2.58065	0.0438418	ENSG00000129993, ENSG00000167244, ENSG00000119938, ENSG00000167701	67	229	19277	5.02561	1
GO TERM: BP	GO:0009161~ribonucleoside monophosphate metabolic process	GO:0009161	ribonucleoside monophosphate metabolic process	5	3.22581	0.043931	ENSG00000129993, ENSG00000198695, ENSG00000198840, ENSG00000228253, ENSG00000198786	67	388	19277	3.70769	1
GO TERM: BP	GO:0042775~mitochondrial ATP synthesis coupled electron transport	GO:0042775	mitochondrial ATP synthesis coupled electron transport	3	1.93548	0.0494638	ENSG00000198695, ENSG00000198840, ENSG00000198786	67	104	19277	8.29951	1
GO TERM: BP	GO:0042773~ATP synthesis coupled electron transport	GO:0042773	ATP synthesis coupled electron transport	3	1.93548	0.0494638	ENSG00000198695, ENSG00000198840, ENSG00000198786	67	104	19277	8.29951	1
GO TERM: BP	GO:0009123~nucleoside monophosphate metabolic process	GO:0009123	nucleoside monophosphate metabolic process	5	3.22581	0.0496477	ENSG00000129993, ENSG00000198695, ENSG00000198840, ENSG00000228253, ENSG00000198786	67	404	19277	3.56085	1

## Sheet: KEGG
Category	Term	ID	Pathway	Count	%	PValue	Genes	List Total	Pop Hits	Pop Total	Fold Enrichment	Benjamini padj
KEGG_PATHWAY	hsa00970:Aminoacyl-tRNA biosynthesis	hsa00970	Aminoacyl-tRNA biosynthesis	6	3.87097	1.24705e-05	ENSG00000210164, ENSG00000210176, ENSG00000210107, ENSG00000210195, ENSG00000210184, ENSG00000210194	39	66	8112	18.9091	0.000935289
KEGG_PATHWAY	hsa05016:Huntington disease	hsa05016	Huntington disease	6	3.87097	0.0133617	ENSG00000228049, ENSG00000198695, ENSG00000075886, ENSG00000198840, ENSG00000228253, ENSG00000198786	39	306	8112	4.07843	0.380445
KEGG_PATHWAY	hsa05208:Chemical carcinogenesis - reactive oxygen species	hsa05208	Chemical carcinogenesis - reactive oxygen species	5	3.22581	0.0197489	ENSG00000099984, ENSG00000198695, ENSG00000198840, ENSG00000228253, ENSG00000198786	39	223	8112	4.66368	0.380445
KEGG_PATHWAY	hsa00190:Oxidative phosphorylation	hsa00190	Oxidative phosphorylation	4	2.58065	0.0244073	ENSG00000198695, ENSG00000198840, ENSG00000228253, ENSG00000198786	39	134	8112	6.20896	0.380445
KEGG_PATHWAY	hsa05322:Systemic lupus erythematosus	hsa05322	Systemic lupus erythematosus	4	2.58065	0.025363	ENSG00000273802, ENSG00000203814, ENSG00000277157, ENSG00000273983	39	136	8112	6.11765	0.380445
KEGG_PATHWAY	hsa05012:Parkinson disease	hsa05012	Parkinson disease	5	3.22581	0.0348235	ENSG00000198695, ENSG00000075886, ENSG00000198840, ENSG00000228253, ENSG00000198786	39	266	8112	3.90977	0.404725
KEGG_PATHWAY	hsa05020:Prion disease	hsa05020	Prion disease	5	3.22581	0.0377743	ENSG00000198695, ENSG00000075886, ENSG00000198840, ENSG00000228253, ENSG00000198786	39	273	8112	3.80952	0.404725

## Sheet: Reactome
Category	Term	ID	Pathway	Count	%	PValue	Genes	List Total	Pop Hits	Pop Total	Fold Enrichment	Benjamini padj
REACTOME_PATHWAY	R-HSA-9609690~HCMV Early Events	R-HSA-9609690	HCMV Early Events	5	3.22581	0.000415437	ENSG00000075886, ENSG00000273802, ENSG00000203814, ENSG00000277157, ENSG00000273983	29	135	10538	13.4585	0.102136
REACTOME_PATHWAY	R-HSA-9609646~HCMV Infection	R-HSA-9609646	HCMV Infection	5	3.22581	0.000788696	ENSG00000075886, ENSG00000273802, ENSG00000203814, ENSG00000277157, ENSG00000273983	29	160	10538	11.3556	0.102136
REACTOME_PATHWAY	R-HSA-3214815~HDACs deacetylate histones	R-HSA-3214815	HDACs deacetylate histones	4	2.58065	0.00191573	ENSG00000273802, ENSG00000203814, ENSG00000277157, ENSG00000273983	29	94	10538	15.4629	0.165391
REACTOME_PATHWAY	R-HSA-9610379~HCMV Late Events	R-HSA-9610379	HCMV Late Events	4	2.58065	0.00348384	ENSG00000273802, ENSG00000203814, ENSG00000277157, ENSG00000273983	29	116	10538	12.5303	0.218046
REACTOME_PATHWAY	R-HSA-163200~Respiratory electron transport, ATP synthesis by chemiosmotic coupling, and heat production by uncoupling proteins.	R-HSA-163200	Respiratory electron transport, ATP synthesis by chemiosmotic coupling, and heat production by uncoupling proteins.	4	2.58065	0.00449386	ENSG00000198695, ENSG00000198840, ENSG00000228253, ENSG00000198786	29	127	10538	11.445	0.218046
REACTOME_PATHWAY	R-HSA-3214847~HATs acetylate histones	R-HSA-3214847	HATs acetylate histones	4	2.58065	0.00613253	ENSG00000273802, ENSG00000203814, ENSG00000277157, ENSG00000273983	29	142	10538	10.236	0.218046
REACTOME_PATHWAY	R-HSA-6799198~Complex I biogenesis	R-HSA-6799198	Complex I biogenesis	3	1.93548	0.00992879	ENSG00000198695, ENSG00000198840, ENSG00000198786	29	57	10538	19.1252	0.218046
REACTOME_PATHWAY	R-HSA-195258~RHO GTPase Effectors	R-HSA-195258	RHO GTPase Effectors	5	3.22581	0.0103472	ENSG00000075886, ENSG00000273802, ENSG00000175279, ENSG00000277157, ENSG00000273983	29	327	10538	5.55626	0.218046
REACTOME_PATHWAY	R-HSA-1428517~The citric acid (TCA) cycle and respiratory electron transport	R-HSA-1428517	The citric acid (TCA) cycle and respiratory electron transport	4	2.58065	0.0113835	ENSG00000198695, ENSG00000198840, ENSG00000228253, ENSG00000198786	29	178	10538	8.16583	0.218046
REACTOME_PATHWAY	R-HSA-73728~RNA Polymerase I Promoter Opening	R-HSA-73728	RNA Polymerase I Promoter Opening	3	1.93548	0.0120312	ENSG00000273802, ENSG00000277157, ENSG00000273983	29	63	10538	17.3038	0.218046
REACTOME_PATHWAY	R-HSA-5334118~DNA methylation	R-HSA-5334118	DNA methylation	3	1.93548	0.0127718	ENSG00000273802, ENSG00000277157, ENSG00000273983	29	65	10538	16.7714	0.218046
REACTOME_PATHWAY	R-HSA-5625886~Activated PKN1 stimulates transcription of AR (androgen receptor) regulated genes KLK2 and KLK3	R-HSA-5625886	Activated PKN1 stimulates transcription of AR (androgen receptor) regulated genes KLK2 and KLK3	3	1.93548	0.013532	ENSG00000273802, ENSG00000277157, ENSG00000273983	29	67	10538	16.2707	0.218046
REACTOME_PATHWAY	R-HSA-427359~SIRT1 negatively regulates rRNA expression	R-HSA-427359	SIRT1 negatively regulates rRNA expression	3	1.93548	0.0139193	ENSG00000273802, ENSG00000277157, ENSG00000273983	29	68	10538	16.0314	0.218046
REACTOME_PATHWAY	R-HSA-68616~Assembly of the ORC complex at the origin of replication	R-HSA-68616	Assembly of the ORC complex at the origin of replication	3	1.93548	0.0143114	ENSG00000273802, ENSG00000277157, ENSG00000273983	29	69	10538	15.7991	0.218046
REACTOME_PATHWAY	R-HSA-212300~PRC2 methylates histones and DNA	R-HSA-212300	PRC2 methylates histones and DNA	3	1.93548	0.0159275	ENSG00000273802, ENSG00000277157, ENSG00000273983	29	73	10538	14.9334	0.218046
REACTOME_PATHWAY	R-HSA-9710421~Defective pyroptosis	R-HSA-9710421	Defective pyroptosis	3	1.93548	0.0159275	ENSG00000273802, ENSG00000277157, ENSG00000273983	29	73	10538	14.9334	0.218046
REACTOME_PATHWAY	R-HSA-606279~Deposition of new CENPA-containing nucleosomes at the centromere	R-HSA-606279	Deposition of new CENPA-containing nucleosomes at the centromere	3	1.93548	0.0163432	ENSG00000273802, ENSG00000175279, ENSG00000277157	29	74	10538	14.7316	0.218046
REACTOME_PATHWAY	R-HSA-774815~Nucleosome assembly	R-HSA-774815	Nucleosome assembly	3	1.93548	0.0163432	ENSG00000273802, ENSG00000175279, ENSG00000277157	29	74	10538	14.7316	0.218046
REACTOME_PATHWAY	R-HSA-2299718~Condensation of Prophase Chromosomes	R-HSA-2299718	Condensation of Prophase Chromosomes	3	1.93548	0.0163432	ENSG00000273802, ENSG00000277157, ENSG00000273983	29	74	10538	14.7316	0.218046
REACTOME_PATHWAY	R-HSA-427389~ERCC6 (CSB) and EHMT2 (G9a) positively regulate rRNA expression	R-HSA-427389	ERCC6 (CSB) and EHMT2 (G9a) positively regulate rRNA expression	3	1.93548	0.0171887	ENSG00000273802, ENSG00000277157, ENSG00000273983	29	76	10538	14.3439	0.218046
REACTOME_PATHWAY	R-HSA-912446~Meiotic recombination	R-HSA-912446	Meiotic recombination	3	1.93548	0.0216877	ENSG00000273802, ENSG00000277157, ENSG00000273983	29	86	10538	12.676	0.218046
REACTOME_PATHWAY	R-HSA-68886~M Phase	R-HSA-68886	M Phase	5	3.22581	0.023505	ENSG00000075886, ENSG00000273802, ENSG00000175279, ENSG00000277157, ENSG00000273983	29	418	10538	4.34664	0.218046
REACTOME_PATHWAY	R-HSA-9616222~Transcriptional regulation of granulopoiesis	R-HSA-9616222	Transcriptional regulation of granulopoiesis	3	1.93548	0.0236104	ENSG00000273802, ENSG00000277157, ENSG00000273983	29	90	10538	12.1126	0.218046
REACTOME_PATHWAY	R-HSA-201722~Formation of the beta-catenin:TCF transactivating complex	R-HSA-201722	Formation of the beta-catenin:TCF transactivating complex	3	1.93548	0.0241017	ENSG00000273802, ENSG00000277157, ENSG00000273983	29	91	10538	11.9795	0.218046
REACTOME_PATHWAY	R-HSA-73772~RNA Polymerase I Promoter Escape	R-HSA-73772	RNA Polymerase I Promoter Escape	3	1.93548	0.0241017	ENSG00000273802, ENSG00000277157, ENSG00000273983	29	91	10538	11.9795	0.218046
REACTOME_PATHWAY	R-HSA-5250924~B-WICH complex positively regulates rRNA expression	R-HSA-5250924	B-WICH complex positively regulates rRNA expression	3	1.93548	0.0241017	ENSG00000273802, ENSG00000277157, ENSG00000273983	29	91	10538	11.9795	0.218046
REACTOME_PATHWAY	R-HSA-1912408~Pre-NOTCH Transcription and Translation	R-HSA-1912408	Pre-NOTCH Transcription and Translation	3	1.93548	0.025097	ENSG00000273802, ENSG00000277157, ENSG00000273983	29	93	10538	11.7219	0.218046
REACTOME_PATHWAY	R-HSA-5625740~RHO GTPases activate PKNs	R-HSA-5625740	RHO GTPases activate PKNs	3	1.93548	0.0261091	ENSG00000273802, ENSG00000277157, ENSG00000273983	29	95	10538	11.4751	0.218046
REACTOME_PATHWAY	R-HSA-8936459~RUNX1 regulates genes involved in megakaryocyte differentiation and platelet function	R-HSA-8936459	RUNX1 regulates genes involved in megakaryocyte differentiation and platelet function	3	1.93548	0.0271376	ENSG00000273802, ENSG00000277157, ENSG00000273983	29	97	10538	11.2385	0.218046
REACTOME_PATHWAY	R-HSA-611105~Respiratory electron transport	R-HSA-611105	Respiratory electron transport	3	1.93548	0.0303204	ENSG00000198695, ENSG00000198840, ENSG00000198786	29	103	10538	10.5839	0.218046
REACTOME_PATHWAY	R-HSA-9645723~Diseases of programmed cell death	R-HSA-9645723	Diseases of programmed cell death	3	1.93548	0.0303204	ENSG00000273802, ENSG00000277157, ENSG00000273983	29	103	10538	10.5839	0.218046
REACTOME_PATHWAY	R-HSA-5250913~Positive epigenetic regulation of rRNA expression	R-HSA-5250913	Positive epigenetic regulation of rRNA expression	3	1.93548	0.0319652	ENSG00000273802, ENSG00000277157, ENSG00000273983	29	106	10538	10.2843	0.218046
REACTOME_PATHWAY	R-HSA-5578749~Transcriptional regulation by small RNAs	R-HSA-5578749	Transcriptional regulation by small RNAs	3	1.93548	0.0319652	ENSG00000273802, ENSG00000277157, ENSG00000273983	29	106	10538	10.2843	0.218046
REACTOME_PATHWAY	R-HSA-427413~NoRC negatively regulates rRNA expression	R-HSA-427413	NoRC negatively regulates rRNA expression	3	1.93548	0.0325213	ENSG00000273802, ENSG00000277157, ENSG00000273983	29	107	10538	10.1882	0.218046
REACTOME_PATHWAY	R-HSA-1912422~Pre-NOTCH Expression and Processing	R-HSA-1912422	Pre-NOTCH Expression and Processing	3	1.93548	0.0336449	ENSG00000273802, ENSG00000277157, ENSG00000273983	29	109	10538	10.0013	0.218046
REACTOME_PATHWAY	R-HSA-5250941~Negative epigenetic regulation of rRNA expression	R-HSA-5250941	Negative epigenetic regulation of rRNA expression	3	1.93548	0.0342125	ENSG00000273802, ENSG00000277157, ENSG00000273983	29	110	10538	9.91034	0.218046
REACTOME_PATHWAY	R-HSA-73854~RNA Polymerase I Promoter Clearance	R-HSA-73854	RNA Polymerase I Promoter Clearance	3	1.93548	0.0342125	ENSG00000273802, ENSG00000277157, ENSG00000273983	29	110	10538	9.91034	0.218046
REACTOME_PATHWAY	R-HSA-977225~Amyloid fiber formation	R-HSA-977225	Amyloid fiber formation	3	1.93548	0.0347838	ENSG00000273802, ENSG00000277157, ENSG00000273983	29	111	10538	9.82106	0.218046
REACTOME_PATHWAY	R-HSA-4839726~Chromatin organization	R-HSA-4839726	Chromatin organization	4	2.58065	0.0352734	ENSG00000273802, ENSG00000203814, ENSG00000277157, ENSG00000273983	29	274	10538	5.30481	0.218046
REACTOME_PATHWAY	R-HSA-3247509~Chromatin modifying enzymes	R-HSA-3247509	Chromatin modifying enzymes	4	2.58065	0.0352734	ENSG00000273802, ENSG00000203814, ENSG00000277157, ENSG00000273983	29	274	10538	5.30481	0.218046
REACTOME_PATHWAY	R-HSA-2559582~Senescence-Associated Secretory Phenotype (SASP)	R-HSA-2559582	Senescence-Associated Secretory Phenotype (SASP)	3	1.93548	0.0353589	ENSG00000273802, ENSG00000277157, ENSG00000273983	29	112	10538	9.73337	0.218046
REACTOME_PATHWAY	R-HSA-73864~RNA Polymerase I Transcription	R-HSA-73864	RNA Polymerase I Transcription	3	1.93548	0.0353589	ENSG00000273802, ENSG00000277157, ENSG00000273983	29	112	10538	9.73337	0.218046
REACTOME_PATHWAY	R-HSA-1500620~Meiosis	R-HSA-1500620	Meiosis	3	1.93548	0.0388869	ENSG00000273802, ENSG00000277157, ENSG00000273983	29	118	10538	9.23846	0.234226
REACTOME_PATHWAY	R-HSA-5619507~Activation of HOX genes during differentiation	R-HSA-5619507	Activation of HOX genes during differentiation	3	1.93548	0.0406998	ENSG00000273802, ENSG00000277157, ENSG00000273983	29	121	10538	9.0094	0.23425
REACTOME_PATHWAY	R-HSA-5617472~Activation of anterior HOX genes in hindbrain development during early embryogenesis	R-HSA-5617472	Activation of anterior HOX genes in hindbrain development during early embryogenesis	3	1.93548	0.0406998	ENSG00000273802, ENSG00000277157, ENSG00000273983	29	121	10538	9.0094	0.23425
REACTOME_PATHWAY	R-HSA-2559580~Oxidative Stress Induced Senescence	R-HSA-2559580	Oxidative Stress Induced Senescence	3	1.93548	0.0431665	ENSG00000273802, ENSG00000277157, ENSG00000273983	29	125	10538	8.7211	0.243046
REACTOME_PATHWAY	R-HSA-8939236~RUNX1 regulates transcription of genes involved in differentiation of HSCs	R-HSA-8939236	RUNX1 regulates transcription of genes involved in differentiation of HSCs	3	1.93548	0.0463272	ENSG00000273802, ENSG00000277157, ENSG00000273983	29	130	10538	8.38568	0.249974
REACTOME_PATHWAY	R-HSA-68867~Assembly of the pre-replicative complex	R-HSA-68867	Assembly of the pre-replicative complex	3	1.93548	0.0463272	ENSG00000273802, ENSG00000277157, ENSG00000273983	29	130	10538	8.38568	0.249974
