# Supplementary material for: Culture of Cancer Cells at Physiological Oxygen Levels Affects Gene Expression in a Cell-Type Specific Manner
Source: Preprints.org preprint supplement (doi:10.20944/preprints202208.0497.v1), 2022-08-29
Supplement: Supplementary file 5 [file Table S12 Functional Enrichent SH-SY5Y 18% O2.xlsx]

## Sheet: GO
Category	Term	ID	Name	Count	%	PValue	Genes	List Total	Pop Hits	Pop Total	Fold Enrichment	Benjamini padj
GO TERM: BP	GO:0007399~nervous system development	GO:0007399	nervous system development	22	25.5814	2.00096e-06	ENSG00000153993, ENSG00000132821, ENSG00000015592, ENSG00000138623, ENSG00000179915, ENSG00000205572, ENSG00000105717, ENSG00000041982, ENSG00000028137, ENSG00000167191, ENSG00000157368, ENSG00000175505, ENSG00000037965, ENSG00000253203, ENSG00000077092, ENSG00000188763, ENSG00000143858, ENSG00000188338, ENSG00000187957, ENSG00000078725, ENSG00000105880, ENSG00000076716	55	2541	19277	3.03455	0.0028519
GO TERM: BP	GO:0022008~neurogenesis	GO:0022008	neurogenesis	18	20.9302	2.96148e-06	ENSG00000153993, ENSG00000132821, ENSG00000015592, ENSG00000138623, ENSG00000179915, ENSG00000105717, ENSG00000041982, ENSG00000028137, ENSG00000167191, ENSG00000157368, ENSG00000175505, ENSG00000037965, ENSG00000077092, ENSG00000188763, ENSG00000143858, ENSG00000187957, ENSG00000078725, ENSG00000105880	55	1739	19277	3.62785	0.0028519
GO TERM: BP	GO:0048699~generation of neurons	GO:0048699	generation of neurons	17	19.7674	6.03692e-06	ENSG00000153993, ENSG00000132821, ENSG00000015592, ENSG00000138623, ENSG00000179915, ENSG00000105717, ENSG00000041982, ENSG00000028137, ENSG00000167191, ENSG00000157368, ENSG00000175505, ENSG00000037965, ENSG00000188763, ENSG00000143858, ENSG00000187957, ENSG00000078725, ENSG00000105880	55	1630	19277	3.65543	0.0038757
GO TERM: MF	GO:0005102~receptor binding	GO:0005102	receptor binding	16	18.6047	6.96993e-05	ENSG00000153993, ENSG00000147065, ENSG00000104998, ENSG00000138623, ENSG00000179915, ENSG00000211955, ENSG00000136167, ENSG00000115896, ENSG00000167191, ENSG00000157368, ENSG00000175505, ENSG00000144227, ENSG00000253203, ENSG00000077092, ENSG00000166923, ENSG00000187957	49	1748	16739	3.12689	0.0187491
GO TERM: BP	GO:0048468~cell development	GO:0048468	cell development	18	20.9302	0.000118997	ENSG00000153993, ENSG00000132821, ENSG00000147065, ENSG00000015592, ENSG00000138623, ENSG00000179915, ENSG00000105717, ENSG00000041982, ENSG00000028137, ENSG00000167191, ENSG00000157368, ENSG00000175505, ENSG00000121039, ENSG00000077092, ENSG00000143858, ENSG00000187957, ENSG00000078725, ENSG00000105880	55	2306	19277	2.73584	0.0572969
GO TERM: BP	GO:0051960~regulation of nervous system development	GO:0051960	regulation of nervous system development	11	12.7907	0.000312822	ENSG00000153993, ENSG00000077092, ENSG00000143858, ENSG00000138623, ENSG00000179915, ENSG00000028137, ENSG00000078725, ENSG00000167191, ENSG00000157368, ENSG00000175505, ENSG00000076716	55	969	19277	3.97874	0.120499
GO TERM: BP	GO:0051962~positive regulation of nervous system development	GO:0051962	positive regulation of nervous system development	8	9.30233	0.000990704	ENSG00000143858, ENSG00000138623, ENSG00000179915, ENSG00000028137, ENSG00000078725, ENSG00000167191, ENSG00000157368, ENSG00000175505	55	568	19277	4.93649	0.290609
GO TERM: BP	GO:0098742~cell-cell adhesion via plasma-membrane adhesion molecules	GO:0098742	cell-cell adhesion via plasma-membrane adhesion molecules	6	6.97674	0.0010857	ENSG00000152583, ENSG00000132821, ENSG00000179915, ENSG00000120322, ENSG00000113212, ENSG00000076716	55	279	19277	7.53744	0.290609
GO TERM: BP	GO:0002700~regulation of production of molecular mediator of immune response	GO:0002700	regulation of production of molecular mediator of immune response	5	5.81395	0.00133829	ENSG00000104998, ENSG00000138623, ENSG00000028137, ENSG00000167191, ENSG00000175505	55	171	19277	10.2483	0.290609
GO TERM: BP	GO:0030182~neuron differentiation	GO:0030182	neuron differentiation	12	13.9535	0.00201217	ENSG00000037965, ENSG00000153993, ENSG00000132821, ENSG00000143858, ENSG00000015592, ENSG00000138623, ENSG00000179915, ENSG00000105717, ENSG00000041982, ENSG00000078725, ENSG00000167191, ENSG00000105880	55	1453	19277	2.89463	0.290609
GO TERM: BP	GO:0051338~regulation of transferase activity	GO:0051338	regulation of transferase activity	10	11.6279	0.00216224	ENSG00000134070, ENSG00000162188, ENSG00000155792, ENSG00000179915, ENSG00000166923, ENSG00000223802, ENSG00000167191, ENSG00000130829, ENSG00000157368, ENSG00000183305	55	1036	19277	3.38312	0.290609
GO TERM: BP	GO:0019221~cytokine-mediated signaling pathway	GO:0019221	cytokine-mediated signaling pathway	9	10.4651	0.00232739	ENSG00000134070, ENSG00000207926, ENSG00000147065, ENSG00000104998, ENSG00000136167, ENSG00000196611, ENSG00000028137, ENSG00000157368, ENSG00000175505	55	847	19277	3.72422	0.290609
GO TERM: BP	GO:0070661~leukocyte proliferation	GO:0070661	leukocyte proliferation	6	6.97674	0.00245412	ENSG00000147065, ENSG00000104998, ENSG00000166923, ENSG00000028137, ENSG00000157368, ENSG00000175505	55	336	19277	6.25877	0.290609
GO TERM: BP	GO:0032270~positive regulation of cellular protein metabolic process	GO:0032270	positive regulation of cellular protein metabolic process	13	15.1163	0.00258752	ENSG00000147065, ENSG00000138623, ENSG00000179915, ENSG00000028137, ENSG00000167191, ENSG00000157368, ENSG00000175505, ENSG00000135842, ENSG00000134070, ENSG00000162188, ENSG00000166923, ENSG00000130829, ENSG00000183305	55	1732	19277	2.63071	0.290609
GO TERM: BP	GO:0001934~positive regulation of protein phosphorylation	GO:0001934	positive regulation of protein phosphorylation	10	11.6279	0.00262366	ENSG00000134070, ENSG00000162188, ENSG00000138623, ENSG00000179915, ENSG00000166923, ENSG00000167191, ENSG00000130829, ENSG00000135842, ENSG00000157368, ENSG00000175505	55	1066	19277	3.28791	0.290609
GO TERM: BP	GO:0050769~positive regulation of neurogenesis	GO:0050769	positive regulation of neurogenesis	7	8.13953	0.00271265	ENSG00000143858, ENSG00000138623, ENSG00000028137, ENSG00000078725, ENSG00000167191, ENSG00000157368, ENSG00000175505	55	502	19277	4.88732	0.290609
GO TERM: BP	GO:0050808~synapse organization	GO:0050808	synapse organization	6	6.97674	0.00275047	ENSG00000152583, ENSG00000188763, ENSG00000179915, ENSG00000041982, ENSG00000187957, ENSG00000076716	55	345	19277	6.09549	0.290609
GO TERM: BP	GO:0007417~central nervous system development	GO:0007417	central nervous system development	10	11.6279	0.00275912	ENSG00000077092, ENSG00000138623, ENSG00000179915, ENSG00000188338, ENSG00000105717, ENSG00000028137, ENSG00000187957, ENSG00000157368, ENSG00000105880, ENSG00000175505	55	1074	19277	3.26342	0.290609
GO TERM: BP	GO:0007166~cell surface receptor signaling pathway	GO:0007166	cell surface receptor signaling pathway	19	22.093	0.00276272	ENSG00000153993, ENSG00000147065, ENSG00000104998, ENSG00000138623, ENSG00000179915, ENSG00000211955, ENSG00000136167, ENSG00000196611, ENSG00000028137, ENSG00000167191, ENSG00000157368, ENSG00000175505, ENSG00000134070, ENSG00000207926, ENSG00000188763, ENSG00000166923, ENSG00000187957, ENSG00000105880, ENSG00000076716	55	3293	19277	2.02227	0.290609
GO TERM: BP	GO:0048589~developmental growth	GO:0048589	developmental growth	8	9.30233	0.00292528	ENSG00000153993, ENSG00000121039, ENSG00000077092, ENSG00000188763, ENSG00000143858, ENSG00000138623, ENSG00000041982, ENSG00000130829	55	687	19277	4.08141	0.290609
GO TERM: BP	GO:0001932~regulation of protein phosphorylation	GO:0001932	regulation of protein phosphorylation	12	13.9535	0.00301775	ENSG00000134070, ENSG00000162188, ENSG00000155792, ENSG00000138623, ENSG00000179915, ENSG00000166923, ENSG00000115896, ENSG00000167191, ENSG00000130829, ENSG00000135842, ENSG00000157368, ENSG00000175505	55	1530	19277	2.74895	0.290609
GO TERM: BP	GO:0051347~positive regulation of transferase activity	GO:0051347	positive regulation of transferase activity	8	9.30233	0.00334942	ENSG00000134070, ENSG00000162188, ENSG00000179915, ENSG00000166923, ENSG00000167191, ENSG00000130829, ENSG00000157368, ENSG00000183305	55	704	19277	3.98285	0.29688
GO TERM: BP	GO:0031401~positive regulation of protein modification process	GO:0031401	positive regulation of protein modification process	11	12.7907	0.00345315	ENSG00000134070, ENSG00000162188, ENSG00000138623, ENSG00000179915, ENSG00000166923, ENSG00000167191, ENSG00000130829, ENSG00000135842, ENSG00000157368, ENSG00000175505, ENSG00000183305	55	1329	19277	2.90098	0.29688
GO TERM: BP	GO:1901215~negative regulation of neuron death	GO:1901215	negative regulation of neuron death	5	5.81395	0.00373617	ENSG00000132821, ENSG00000188763, ENSG00000104998, ENSG00000028137, ENSG00000175505	55	227	19277	7.72006	0.29688
GO TERM: BP	GO:0051247~positive regulation of protein metabolic process	GO:0051247	positive regulation of protein metabolic process	13	15.1163	0.00396522	ENSG00000147065, ENSG00000138623, ENSG00000179915, ENSG00000028137, ENSG00000167191, ENSG00000157368, ENSG00000175505, ENSG00000135842, ENSG00000134070, ENSG00000162188, ENSG00000166923, ENSG00000130829, ENSG00000183305	55	1824	19277	2.49802	0.29688
GO TERM: BP	GO:0045860~positive regulation of protein kinase activity	GO:0045860	positive regulation of protein kinase activity	7	8.13953	0.00409895	ENSG00000134070, ENSG00000162188, ENSG00000179915, ENSG00000166923, ENSG00000167191, ENSG00000130829, ENSG00000157368	55	546	19277	4.49347	0.29688
GO TERM: BP	GO:0042327~positive regulation of phosphorylation	GO:0042327	positive regulation of phosphorylation	10	11.6279	0.00412649	ENSG00000134070, ENSG00000162188, ENSG00000138623, ENSG00000179915, ENSG00000166923, ENSG00000167191, ENSG00000130829, ENSG00000135842, ENSG00000157368, ENSG00000175505	55	1141	19277	3.07179	0.29688
GO TERM: BP	GO:0060560~developmental growth involved in morphogenesis	GO:0060560	developmental growth involved in morphogenesis	5	5.81395	0.00416187	ENSG00000153993, ENSG00000121039, ENSG00000143858, ENSG00000138623, ENSG00000041982	55	234	19277	7.48912	0.29688
GO TERM: BP	GO:0048705~skeletal system morphogenesis	GO:0048705	skeletal system morphogenesis	5	5.81395	0.00435397	ENSG00000037965, ENSG00000121039, ENSG00000077092, ENSG00000166923, ENSG00000105880	55	237	19277	7.39432	0.299491
GO TERM: BP	GO:0040007~growth	GO:0040007	growth	9	10.4651	0.00495957	ENSG00000153993, ENSG00000121039, ENSG00000077092, ENSG00000188763, ENSG00000143858, ENSG00000138623, ENSG00000166923, ENSG00000041982, ENSG00000130829	55	959	19277	3.28928	0.322367
GO TERM: BP	GO:0035113~embryonic appendage morphogenesis	GO:0035113	embryonic appendage morphogenesis	4	4.65116	0.00518867	ENSG00000121039, ENSG00000077092, ENSG00000166923, ENSG00000105880	55	125	19277	11.2157	0.322367
GO TERM: BP	GO:0030326~embryonic limb morphogenesis	GO:0030326	embryonic limb morphogenesis	4	4.65116	0.00518867	ENSG00000121039, ENSG00000077092, ENSG00000166923, ENSG00000105880	55	125	19277	11.2157	0.322367
GO TERM: BP	GO:0098609~cell-cell adhesion	GO:0098609	cell-cell adhesion	9	10.4651	0.00560703	ENSG00000152583, ENSG00000132821, ENSG00000147065, ENSG00000104998, ENSG00000179915, ENSG00000028137, ENSG00000120322, ENSG00000113212, ENSG00000076716	55	979	19277	3.22208	0.326524
GO TERM: BP	GO:0040011~locomotion	GO:0040011	locomotion	14	16.2791	0.00564621	ENSG00000153993, ENSG00000132821, ENSG00000147065, ENSG00000104998, ENSG00000138623, ENSG00000179915, ENSG00000211955, ENSG00000136167, ENSG00000196611, ENSG00000157368, ENSG00000166923, ENSG00000187957, ENSG00000105880, ENSG00000076716	55	2158	19277	2.27381	0.326524
GO TERM: BP	GO:0010720~positive regulation of cell development	GO:0010720	positive regulation of cell development	7	8.13953	0.00576418	ENSG00000143858, ENSG00000138623, ENSG00000028137, ENSG00000078725, ENSG00000167191, ENSG00000157368, ENSG00000175505	55	586	19277	4.18675	0.326524
GO TERM: BP	GO:0045687~positive regulation of glial cell differentiation	GO:0045687	positive regulation of glial cell differentiation	3	3.48837	0.00617247	ENSG00000028137, ENSG00000157368, ENSG00000175505	55	42	19277	25.0351	0.332547
GO TERM: BP	GO:0045859~regulation of protein kinase activity	GO:0045859	regulation of protein kinase activity	8	9.30233	0.00660677	ENSG00000134070, ENSG00000162188, ENSG00000155792, ENSG00000179915, ENSG00000166923, ENSG00000167191, ENSG00000130829, ENSG00000157368	55	798	19277	3.51369	0.332547
GO TERM: BP	GO:0042325~regulation of phosphorylation	GO:0042325	regulation of phosphorylation	12	13.9535	0.00682078	ENSG00000134070, ENSG00000162188, ENSG00000155792, ENSG00000138623, ENSG00000179915, ENSG00000166923, ENSG00000115896, ENSG00000167191, ENSG00000130829, ENSG00000135842, ENSG00000157368, ENSG00000175505	55	1704	19277	2.46825	0.332547
GO TERM: BP	GO:0031399~regulation of protein modification process	GO:0031399	regulation of protein modification process	13	15.1163	0.00696056	ENSG00000155792, ENSG00000138623, ENSG00000179915, ENSG00000115896, ENSG00000167191, ENSG00000157368, ENSG00000175505, ENSG00000135842, ENSG00000134070, ENSG00000162188, ENSG00000166923, ENSG00000130829, ENSG00000183305	55	1957	19277	2.32825	0.332547
GO TERM: BP	GO:0001503~ossification	GO:0001503	ossification	6	6.97674	0.00702631	ENSG00000188763, ENSG00000138623, ENSG00000166923, ENSG00000041982, ENSG00000134996, ENSG00000105880	55	431	19277	4.87922	0.332547
GO TERM: BP	GO:0048863~stem cell differentiation	GO:0048863	stem cell differentiation	5	5.81395	0.00723488	ENSG00000112183, ENSG00000153993, ENSG00000121039, ENSG00000138623, ENSG00000166923	55	274	19277	6.39582	0.332547
GO TERM: BP	GO:0010562~positive regulation of phosphorus metabolic process	GO:0010562	positive regulation of phosphorus metabolic process	10	11.6279	0.0072518	ENSG00000134070, ENSG00000162188, ENSG00000138623, ENSG00000179915, ENSG00000166923, ENSG00000167191, ENSG00000130829, ENSG00000135842, ENSG00000157368, ENSG00000175505	55	1245	19277	2.81519	0.332547
GO TERM: BP	GO:0045937~positive regulation of phosphate metabolic process	GO:0045937	positive regulation of phosphate metabolic process	10	11.6279	0.0072518	ENSG00000134070, ENSG00000162188, ENSG00000138623, ENSG00000179915, ENSG00000166923, ENSG00000167191, ENSG00000130829, ENSG00000135842, ENSG00000157368, ENSG00000175505	55	1245	19277	2.81519	0.332547
GO TERM: BP	GO:0033674~positive regulation of kinase activity	GO:0033674	positive regulation of kinase activity	7	8.13953	0.00747476	ENSG00000134070, ENSG00000162188, ENSG00000179915, ENSG00000166923, ENSG00000167191, ENSG00000130829, ENSG00000157368	55	619	19277	3.96355	0.334068
GO TERM: BP	GO:0031325~positive regulation of cellular metabolic process	GO:0031325	positive regulation of cellular metabolic process	19	22.093	0.00767999	ENSG00000147065, ENSG00000138623, ENSG00000179915, ENSG00000105717, ENSG00000028137, ENSG00000167191, ENSG00000157368, ENSG00000175505, ENSG00000135842, ENSG00000134070, ENSG00000121039, ENSG00000162188, ENSG00000077092, ENSG00000188338, ENSG00000166923, ENSG00000223802, ENSG00000130829, ENSG00000105880, ENSG00000183305	55	3616	19277	1.84163	0.334068
GO TERM: BP	GO:0009893~positive regulation of metabolic process	GO:0009893	positive regulation of metabolic process	20	23.2558	0.00780533	ENSG00000147065, ENSG00000138623, ENSG00000179915, ENSG00000105717, ENSG00000041982, ENSG00000028137, ENSG00000167191, ENSG00000157368, ENSG00000175505, ENSG00000135842, ENSG00000134070, ENSG00000121039, ENSG00000162188, ENSG00000077092, ENSG00000188338, ENSG00000166923, ENSG00000223802, ENSG00000130829, ENSG00000105880, ENSG00000183305	55	3913	19277	1.79142	0.334068
GO TERM: BP	GO:0035108~limb morphogenesis	GO:0035108	limb morphogenesis	4	4.65116	0.0084168	ENSG00000121039, ENSG00000077092, ENSG00000166923, ENSG00000105880	55	149	19277	9.40915	0.343805
GO TERM: BP	GO:0035107~appendage morphogenesis	GO:0035107	appendage morphogenesis	4	4.65116	0.0084168	ENSG00000121039, ENSG00000077092, ENSG00000166923, ENSG00000105880	55	149	19277	9.40915	0.343805
GO TERM: BP	GO:0007411~axon guidance	GO:0007411	axon guidance	5	5.81395	0.00879668	ENSG00000153993, ENSG00000132821, ENSG00000138623, ENSG00000179915, ENSG00000105880	55	290	19277	6.04295	0.343805
GO TERM: BP	GO:0097485~neuron projection guidance	GO:0097485	neuron projection guidance	5	5.81395	0.00890105	ENSG00000153993, ENSG00000132821, ENSG00000138623, ENSG00000179915, ENSG00000105880	55	291	19277	6.02218	0.343805
GO TERM: BP	GO:0051094~positive regulation of developmental process	GO:0051094	positive regulation of developmental process	11	12.7907	0.00892536	ENSG00000112183, ENSG00000188763, ENSG00000143858, ENSG00000138623, ENSG00000179915, ENSG00000166923, ENSG00000028137, ENSG00000078725, ENSG00000167191, ENSG00000157368, ENSG00000175505	55	1523	19277	2.53145	0.343805
GO TERM: BP	GO:0045597~positive regulation of cell differentiation	GO:0045597	positive regulation of cell differentiation	9	10.4651	0.00966392	ENSG00000112183, ENSG00000143858, ENSG00000138623, ENSG00000166923, ENSG00000028137, ENSG00000078725, ENSG00000167191, ENSG00000157368, ENSG00000175505	55	1075	19277	2.93434	0.35875
GO TERM: BP	GO:0050767~regulation of neurogenesis	GO:0050767	regulation of neurogenesis	8	9.30233	0.00978538	ENSG00000153993, ENSG00000143858, ENSG00000138623, ENSG00000028137, ENSG00000078725, ENSG00000167191, ENSG00000157368, ENSG00000175505	55	860	19277	3.26038	0.35875
GO TERM: BP	GO:0043524~negative regulation of neuron apoptotic process	GO:0043524	negative regulation of neuron apoptotic process	4	4.65116	0.00987215	ENSG00000132821, ENSG00000188763, ENSG00000104998, ENSG00000175505	55	158	19277	8.87319	0.35875
GO TERM: BP	GO:0007155~cell adhesion	GO:0007155	cell adhesion	11	12.7907	0.0101746	ENSG00000152583, ENSG00000132821, ENSG00000147065, ENSG00000104998, ENSG00000179915, ENSG00000166923, ENSG00000041982, ENSG00000028137, ENSG00000120322, ENSG00000113212, ENSG00000076716	55	1553	19277	2.48255	0.362894
GO TERM: BP	GO:0022610~biological adhesion	GO:0022610	biological adhesion	11	12.7907	0.0104846	ENSG00000152583, ENSG00000132821, ENSG00000147065, ENSG00000104998, ENSG00000179915, ENSG00000166923, ENSG00000041982, ENSG00000028137, ENSG00000120322, ENSG00000113212, ENSG00000076716	55	1560	19277	2.47141	0.367153
GO TERM: BP	GO:0071310~cellular response to organic substance	GO:0071310	cellular response to organic substance	16	18.6047	0.01086	ENSG00000147065, ENSG00000104998, ENSG00000179915, ENSG00000136167, ENSG00000041982, ENSG00000196611, ENSG00000028137, ENSG00000157368, ENSG00000175505, ENSG00000134070, ENSG00000207926, ENSG00000077092, ENSG00000166923, ENSG00000223802, ENSG00000078725, ENSG00000105880	55	2881	19277	1.9465	0.373506
GO TERM: BP	GO:0002440~production of molecular mediator of immune response	GO:0002440	production of molecular mediator of immune response	5	5.81395	0.0116541	ENSG00000104998, ENSG00000138623, ENSG00000028137, ENSG00000167191, ENSG00000175505	55	315	19277	5.56335	0.388455
GO TERM: BP	GO:0006935~chemotaxis	GO:0006935	chemotaxis	7	8.13953	0.0118791	ENSG00000153993, ENSG00000132821, ENSG00000138623, ENSG00000179915, ENSG00000166923, ENSG00000157368, ENSG00000105880	55	684	19277	3.5869	0.388455
GO TERM: BP	GO:0061098~positive regulation of protein tyrosine kinase activity	GO:0061098	positive regulation of protein tyrosine kinase activity	3	3.48837	0.0118997	ENSG00000166923, ENSG00000167191, ENSG00000157368	55	59	19277	17.8216	0.388455
GO TERM: BP	GO:0042330~taxis	GO:0042330	taxis	7	8.13953	0.0121995	ENSG00000153993, ENSG00000132821, ENSG00000138623, ENSG00000179915, ENSG00000166923, ENSG00000157368, ENSG00000105880	55	688	19277	3.56604	0.391605
GO TERM: BP	GO:0009887~animal organ morphogenesis	GO:0009887	animal organ morphogenesis	9	10.4651	0.0127502	ENSG00000037965, ENSG00000121039, ENSG00000077092, ENSG00000147065, ENSG00000166923, ENSG00000105717, ENSG00000041982, ENSG00000105880, ENSG00000076716	55	1129	19277	2.79399	0.401659
GO TERM: BP	GO:0043549~regulation of kinase activity	GO:0043549	regulation of kinase activity	8	9.30233	0.0129298	ENSG00000134070, ENSG00000162188, ENSG00000155792, ENSG00000179915, ENSG00000166923, ENSG00000167191, ENSG00000130829, ENSG00000157368	55	908	19277	3.08803	0.401659
GO TERM: BP	GO:0006928~movement of cell or subcellular component	GO:0006928	movement of cell or subcellular component	14	16.2791	0.0136768	ENSG00000153993, ENSG00000132821, ENSG00000147065, ENSG00000104998, ENSG00000138623, ENSG00000179915, ENSG00000211955, ENSG00000136167, ENSG00000196611, ENSG00000157368, ENSG00000166923, ENSG00000187957, ENSG00000105880, ENSG00000076716	55	2405	19277	2.04028	0.405005
GO TERM: BP	GO:0032147~activation of protein kinase activity	GO:0032147	activation of protein kinase activity	5	5.81395	0.0141854	ENSG00000134070, ENSG00000162188, ENSG00000166923, ENSG00000167191, ENSG00000130829	55	334	19277	5.24687	0.405005
GO TERM: BP	GO:0071902~positive regulation of protein serine/threonine kinase activity	GO:0071902	positive regulation of protein serine/threonine kinase activity	5	5.81395	0.0146146	ENSG00000134070, ENSG00000162188, ENSG00000179915, ENSG00000130829, ENSG00000157368	55	337	19277	5.20016	0.405005
GO TERM: BP	GO:0060173~limb development	GO:0060173	limb development	4	4.65116	0.0148596	ENSG00000121039, ENSG00000077092, ENSG00000166923, ENSG00000105880	55	184	19277	7.61937	0.405005
GO TERM: BP	GO:0048736~appendage development	GO:0048736	appendage development	4	4.65116	0.0148596	ENSG00000121039, ENSG00000077092, ENSG00000166923, ENSG00000105880	55	184	19277	7.61937	0.405005
GO TERM: BP	GO:1901214~regulation of neuron death	GO:1901214	regulation of neuron death	5	5.81395	0.0149052	ENSG00000132821, ENSG00000188763, ENSG00000104998, ENSG00000028137, ENSG00000175505	55	339	19277	5.16948	0.405005
GO TERM: BP	GO:0051240~positive regulation of multicellular organismal process	GO:0051240	positive regulation of multicellular organismal process	12	13.9535	0.0150859	ENSG00000112183, ENSG00000188763, ENSG00000143858, ENSG00000104998, ENSG00000138623, ENSG00000179915, ENSG00000166923, ENSG00000028137, ENSG00000078725, ENSG00000167191, ENSG00000157368, ENSG00000175505	55	1904	19277	2.20898	0.405005
GO TERM: BP	GO:0016477~cell migration	GO:0016477	cell migration	11	12.7907	0.0156352	ENSG00000153993, ENSG00000147065, ENSG00000104998, ENSG00000211955, ENSG00000138623, ENSG00000166923, ENSG00000136167, ENSG00000196611, ENSG00000187957, ENSG00000157368, ENSG00000076716	55	1658	19277	2.32533	0.405005
GO TERM: BP	GO:1902533~positive regulation of intracellular signal transduction	GO:1902533	positive regulation of intracellular signal transduction	9	10.4651	0.0159111	ENSG00000134070, ENSG00000162188, ENSG00000138623, ENSG00000179915, ENSG00000166923, ENSG00000167191, ENSG00000130829, ENSG00000157368, ENSG00000175505	55	1175	19277	2.68461	0.405005
GO TERM: BP	GO:0019220~regulation of phosphate metabolic process	GO:0019220	regulation of phosphate metabolic process	12	13.9535	0.0159262	ENSG00000134070, ENSG00000162188, ENSG00000155792, ENSG00000138623, ENSG00000179915, ENSG00000166923, ENSG00000115896, ENSG00000167191, ENSG00000130829, ENSG00000135842, ENSG00000157368, ENSG00000175505	55	1919	19277	2.19171	0.405005
GO TERM: BP	GO:0010604~positive regulation of macromolecule metabolic process	GO:0010604	positive regulation of macromolecule metabolic process	18	20.9302	0.0159504	ENSG00000147065, ENSG00000138623, ENSG00000179915, ENSG00000105717, ENSG00000041982, ENSG00000028137, ENSG00000167191, ENSG00000157368, ENSG00000175505, ENSG00000135842, ENSG00000134070, ENSG00000162188, ENSG00000077092, ENSG00000188338, ENSG00000166923, ENSG00000130829, ENSG00000105880, ENSG00000183305	55	3588	19277	1.75832	0.405005
GO TERM: BP	GO:0045685~regulation of glial cell differentiation	GO:0045685	regulation of glial cell differentiation	3	3.48837	0.0160283	ENSG00000028137, ENSG00000157368, ENSG00000175505	55	69	19277	15.2387	0.405005
GO TERM: BP	GO:0008361~regulation of cell size	GO:0008361	regulation of cell size	4	4.65116	0.0161793	ENSG00000153993, ENSG00000147065, ENSG00000155792, ENSG00000138623	55	190	19277	7.37876	0.405005
GO TERM: BP	GO:0048666~neuron development	GO:0048666	neuron development	9	10.4651	0.0162108	ENSG00000153993, ENSG00000132821, ENSG00000143858, ENSG00000015592, ENSG00000138623, ENSG00000179915, ENSG00000105717, ENSG00000041982, ENSG00000105880	55	1179	19277	2.6755	0.405005
GO TERM: BP	GO:0051174~regulation of phosphorus metabolic process	GO:0051174	regulation of phosphorus metabolic process	12	13.9535	0.0164472	ENSG00000134070, ENSG00000162188, ENSG00000155792, ENSG00000138623, ENSG00000179915, ENSG00000166923, ENSG00000115896, ENSG00000167191, ENSG00000130829, ENSG00000135842, ENSG00000157368, ENSG00000175505	55	1928	19277	2.18148	0.405005
GO TERM: BP	GO:0050922~negative regulation of chemotaxis	GO:0050922	negative regulation of chemotaxis	3	3.48837	0.0164704	ENSG00000153993, ENSG00000138623, ENSG00000166923	55	70	19277	15.021	0.405005
GO TERM: BP	GO:0001501~skeletal system development	GO:0001501	skeletal system development	6	6.97674	0.0167285	ENSG00000037965, ENSG00000121039, ENSG00000077092, ENSG00000253203, ENSG00000166923, ENSG00000105880	55	535	19277	3.93074	0.405005
GO TERM: BP	GO:0071345~cellular response to cytokine stimulus	GO:0071345	cellular response to cytokine stimulus	9	10.4651	0.0168226	ENSG00000134070, ENSG00000207926, ENSG00000147065, ENSG00000104998, ENSG00000136167, ENSG00000196611, ENSG00000028137, ENSG00000157368, ENSG00000175505	55	1187	19277	2.65747	0.405005
GO TERM: BP	GO:0050900~leukocyte migration	GO:0050900	leukocyte migration	6	6.97674	0.0178503	ENSG00000147065, ENSG00000104998, ENSG00000211955, ENSG00000166923, ENSG00000196611, ENSG00000157368	55	544	19277	3.86571	0.423143
GO TERM: BP	GO:0051246~regulation of protein metabolic process	GO:0051246	regulation of protein metabolic process	18	20.9302	0.0182158	ENSG00000147065, ENSG00000155792, ENSG00000138623, ENSG00000179915, ENSG00000211955, ENSG00000028137, ENSG00000115896, ENSG00000167191, ENSG00000157368, ENSG00000175505, ENSG00000135842, ENSG00000134070, ENSG00000112183, ENSG00000207926, ENSG00000162188, ENSG00000166923, ENSG00000130829, ENSG00000183305	55	3639	19277	1.73367	0.423143
GO TERM: BP	GO:0061564~axon development	GO:0061564	axon development	6	6.97674	0.0182352	ENSG00000153993, ENSG00000132821, ENSG00000138623, ENSG00000179915, ENSG00000041982, ENSG00000105880	55	547	19277	3.84451	0.423143
GO TERM: BP	GO:0002697~regulation of immune effector process	GO:0002697	regulation of immune effector process	6	6.97674	0.0188887	ENSG00000104998, ENSG00000211955, ENSG00000138623, ENSG00000028137, ENSG00000167191, ENSG00000175505	55	552	19277	3.80968	0.430182
GO TERM: BP	GO:0050731~positive regulation of peptidyl-tyrosine phosphorylation	GO:0050731	positive regulation of peptidyl-tyrosine phosphorylation	4	4.65116	0.0190111	ENSG00000166923, ENSG00000167191, ENSG00000157368, ENSG00000175505	55	202	19277	6.94041	0.430182
GO TERM: BP	GO:0070997~neuron death	GO:0070997	neuron death	5	5.81395	0.0193643	ENSG00000132821, ENSG00000188763, ENSG00000104998, ENSG00000028137, ENSG00000175505	55	367	19277	4.77508	0.430182
GO TERM: BP	GO:0032268~regulation of cellular protein metabolic process	GO:0032268	regulation of cellular protein metabolic process	17	19.7674	0.0194319	ENSG00000147065, ENSG00000155792, ENSG00000138623, ENSG00000179915, ENSG00000028137, ENSG00000115896, ENSG00000167191, ENSG00000157368, ENSG00000175505, ENSG00000135842, ENSG00000134070, ENSG00000112183, ENSG00000207926, ENSG00000162188, ENSG00000166923, ENSG00000130829, ENSG00000183305	55	3370	19277	1.76806	0.430182
GO TERM: CC	GO:0005576~extracellular region	GO:0005576	extracellular region	26	30.2326	0.00250151	ENSG00000152583, ENSG00000153993, ENSG00000041982, ENSG00000135842, ENSG00000134996, ENSG00000175505, ENSG00000207926, ENSG00000144227, ENSG00000253203, ENSG00000166979, ENSG00000076716, ENSG00000132821, ENSG00000147065, ENSG00000211955, ENSG00000138623, ENSG00000136167, ENSG00000196611, ENSG00000028137, ENSG00000167191, ENSG00000157368, ENSG00000116774, ENSG00000166923, ENSG00000145244, ENSG0000…	55	4751	17223	1.7137	0.435483
GO TERM: CC	GO:0009986~cell surface	GO:0009986	cell surface	10	11.6279	0.00460829	ENSG00000188763, ENSG00000147065, ENSG00000104998, ENSG00000211955, ENSG00000138623, ENSG00000179915, ENSG00000166923, ENSG00000145244, ENSG00000167191, ENSG00000076716	55	1037	17223	3.01972	0.435483
GO TERM: BP	GO:0014015~positive regulation of gliogenesis	GO:0014015	positive regulation of gliogenesis	3	3.48837	0.0201918	ENSG00000028137, ENSG00000157368, ENSG00000175505	55	78	19277	13.4804	0.441924
GO TERM: BP	GO:0043410~positive regulation of MAPK cascade	GO:0043410	positive regulation of MAPK cascade	6	6.97674	0.0205203	ENSG00000134070, ENSG00000162188, ENSG00000138623, ENSG00000179915, ENSG00000130829, ENSG00000157368	55	564	19277	3.72863	0.444069
GO TERM: BP	GO:0031175~neuron projection development	GO:0031175	neuron projection development	8	9.30233	0.0211158	ENSG00000153993, ENSG00000132821, ENSG00000143858, ENSG00000015592, ENSG00000138623, ENSG00000179915, ENSG00000041982, ENSG00000105880	55	1002	19277	2.79833	0.451878
GO TERM: BP	GO:0060284~regulation of cell development	GO:0060284	regulation of cell development	8	9.30233	0.0218439	ENSG00000153993, ENSG00000143858, ENSG00000138623, ENSG00000028137, ENSG00000078725, ENSG00000167191, ENSG00000157368, ENSG00000175505	55	1009	19277	2.77892	0.462322
GO TERM: BP	GO:0045595~regulation of cell differentiation	GO:0045595	regulation of cell differentiation	12	13.9535	0.022252	ENSG00000112183, ENSG00000153993, ENSG00000077092, ENSG00000183508, ENSG00000143858, ENSG00000138623, ENSG00000166923, ENSG00000028137, ENSG00000078725, ENSG00000167191, ENSG00000157368, ENSG00000175505	55	2016	19277	2.08626	0.465842
GO TERM: BP	GO:0014032~neural crest cell development	GO:0014032	neural crest cell development	3	3.48837	0.0226793	ENSG00000153993, ENSG00000121039, ENSG00000138623	55	83	19277	12.6683	0.469682
GO TERM: BP	GO:0009967~positive regulation of signal transduction	GO:0009967	positive regulation of signal transduction	11	12.7907	0.0238924	ENSG00000134070, ENSG00000162188, ENSG00000188763, ENSG00000138623, ENSG00000179915, ENSG00000166923, ENSG00000167191, ENSG00000130829, ENSG00000157368, ENSG00000105880, ENSG00000175505	55	1773	19277	2.17451	0.48954
GO TERM: BP	GO:0070887~cellular response to chemical stimulus	GO:0070887	cellular response to chemical stimulus	17	19.7674	0.0248531	ENSG00000147065, ENSG00000104998, ENSG00000179915, ENSG00000136167, ENSG00000041982, ENSG00000196611, ENSG00000028137, ENSG00000157368, ENSG00000175505, ENSG00000134070, ENSG00000207926, ENSG00000077092, ENSG00000143858, ENSG00000166923, ENSG00000223802, ENSG00000078725, ENSG00000105880	55	3466	19277	1.71908	0.492149
GO TERM: BP	GO:0043523~regulation of neuron apoptotic process	GO:0043523	regulation of neuron apoptotic process	4	4.65116	0.0248745	ENSG00000132821, ENSG00000188763, ENSG00000104998, ENSG00000175505	55	224	19277	6.25877	0.492149
GO TERM: BP	GO:0048864~stem cell development	GO:0048864	stem cell development	3	3.48837	0.0252868	ENSG00000153993, ENSG00000121039, ENSG00000138623	55	88	19277	11.9486	0.492149
GO TERM: BP	GO:0014031~mesenchymal cell development	GO:0014031	mesenchymal cell development	3	3.48837	0.0252868	ENSG00000153993, ENSG00000121039, ENSG00000138623	55	88	19277	11.9486	0.492149
GO TERM: BP	GO:0002685~regulation of leukocyte migration	GO:0002685	regulation of leukocyte migration	4	4.65116	0.0257415	ENSG00000147065, ENSG00000104998, ENSG00000166923, ENSG00000157368	55	227	19277	6.17605	0.492149
GO TERM: BP	GO:0032535~regulation of cellular component size	GO:0032535	regulation of cellular component size	5	5.81395	0.0259978	ENSG00000104883, ENSG00000153993, ENSG00000147065, ENSG00000155792, ENSG00000138623	55	402	19277	4.35934	0.492149
GO TERM: BP	GO:0010001~glial cell differentiation	GO:0010001	glial cell differentiation	4	4.65116	0.0260342	ENSG00000028137, ENSG00000187957, ENSG00000157368, ENSG00000175505	55	228	19277	6.14896	0.492149
GO TERM: BP	GO:0034097~response to cytokine	GO:0034097	response to cytokine	9	10.4651	0.0260639	ENSG00000134070, ENSG00000207926, ENSG00000147065, ENSG00000104998, ENSG00000136167, ENSG00000196611, ENSG00000028137, ENSG00000157368, ENSG00000175505	55	1288	19277	2.44908	0.492149
GO TERM: BP	GO:0043406~positive regulation of MAP kinase activity	GO:0043406	positive regulation of MAP kinase activity	4	4.65116	0.0269228	ENSG00000134070, ENSG00000162188, ENSG00000130829, ENSG00000157368	55	231	19277	6.06911	0.50343
GO TERM: BP	GO:0006468~protein phosphorylation	GO:0006468	protein phosphorylation	12	13.9535	0.0277831	ENSG00000134070, ENSG00000162188, ENSG00000155792, ENSG00000138623, ENSG00000179915, ENSG00000166923, ENSG00000115896, ENSG00000167191, ENSG00000130829, ENSG00000135842, ENSG00000157368, ENSG00000175505	55	2085	19277	2.01721	0.50488
GO TERM: BP	GO:0061097~regulation of protein tyrosine kinase activity	GO:0061097	regulation of protein tyrosine kinase activity	3	3.48837	0.0280104	ENSG00000166923, ENSG00000167191, ENSG00000157368	55	93	19277	11.3062	0.50488
GO TERM: BP	GO:0000902~cell morphogenesis	GO:0000902	cell morphogenesis	8	9.30233	0.0281875	ENSG00000153993, ENSG00000132821, ENSG00000147065, ENSG00000143858, ENSG00000138623, ENSG00000179915, ENSG00000166923, ENSG00000105880	55	1064	19277	2.63527	0.50488
GO TERM: BP	GO:0009605~response to external stimulus	GO:0009605	response to external stimulus	15	17.4419	0.0282783	ENSG00000153993, ENSG00000132821, ENSG00000104998, ENSG00000138623, ENSG00000179915, ENSG00000211955, ENSG00000041982, ENSG00000028137, ENSG00000167191, ENSG00000157368, ENSG00000134070, ENSG00000207926, ENSG00000188338, ENSG00000166923, ENSG00000105880	55	2932	19277	1.7931	0.50488
GO TERM: BP	GO:1903827~regulation of cellular protein localization	GO:1903827	regulation of cellular protein localization	6	6.97674	0.028311	ENSG00000188763, ENSG00000147065, ENSG00000179915, ENSG00000136167, ENSG00000126950, ENSG00000076716	55	614	19277	3.42499	0.50488
GO TERM: BP	GO:0001649~osteoblast differentiation	GO:0001649	osteoblast differentiation	4	4.65116	0.0290592	ENSG00000138623, ENSG00000166923, ENSG00000041982, ENSG00000105880	55	238	19277	5.8906	0.509637
GO TERM: BP	GO:0014033~neural crest cell differentiation	GO:0014033	neural crest cell differentiation	3	3.48837	0.0291316	ENSG00000153993, ENSG00000121039, ENSG00000138623	55	95	19277	11.0681	0.509637
GO TERM: BP	GO:0050920~regulation of chemotaxis	GO:0050920	regulation of chemotaxis	4	4.65116	0.0293716	ENSG00000153993, ENSG00000138623, ENSG00000166923, ENSG00000157368	55	239	19277	5.86596	0.509637
GO TERM: BP	GO:0046649~lymphocyte activation	GO:0046649	lymphocyte activation	7	8.13953	0.0299879	ENSG00000188763, ENSG00000147065, ENSG00000104998, ENSG00000211955, ENSG00000136167, ENSG00000028137, ENSG00000175505	55	844	19277	2.90692	0.513494
GO TERM: BP	GO:0071492~cellular response to UV-A	GO:0071492	cellular response to UV-A	2	2.32558	0.0303937	ENSG00000196611, ENSG00000223802	55	11	19277	63.7256	0.513494
GO TERM: BP	GO:0071803~positive regulation of podosome assembly	GO:0071803	positive regulation of podosome assembly	2	2.32558	0.0303937	ENSG00000147065, ENSG00000136167	55	11	19277	63.7256	0.513494
GO TERM: BP	GO:0030198~extracellular matrix organization	GO:0030198	extracellular matrix organization	5	5.81395	0.0312517	ENSG00000166923, ENSG00000136167, ENSG00000196611, ENSG00000041982, ENSG00000028137	55	426	19277	4.11374	0.518107
GO TERM: BP	GO:0043062~extracellular structure organization	GO:0043062	extracellular structure organization	5	5.81395	0.0314833	ENSG00000166923, ENSG00000136167, ENSG00000196611, ENSG00000041982, ENSG00000028137	55	427	19277	4.10411	0.518107
GO TERM: BP	GO:0051402~neuron apoptotic process	GO:0051402	neuron apoptotic process	4	4.65116	0.0319351	ENSG00000132821, ENSG00000188763, ENSG00000104998, ENSG00000175505	55	247	19277	5.67597	0.518107
GO TERM: BP	GO:0002367~cytokine production involved in immune response	GO:0002367	cytokine production involved in immune response	3	3.48837	0.0320118	ENSG00000138623, ENSG00000028137, ENSG00000167191	55	100	19277	10.5147	0.518107
GO TERM: BP	GO:0002718~regulation of cytokine production involved in immune response	GO:0002718	regulation of cytokine production involved in immune response	3	3.48837	0.0320118	ENSG00000138623, ENSG00000028137, ENSG00000167191	55	100	19277	10.5147	0.518107
GO TERM: BP	GO:1905114~cell surface receptor signaling pathway involved in cell-cell signaling	GO:1905114	cell surface receptor signaling pathway involved in cell-cell signaling	6	6.97674	0.0328307	ENSG00000188763, ENSG00000179915, ENSG00000166923, ENSG00000167191, ENSG00000105880, ENSG00000076716	55	639	19277	3.29099	0.526933
GO TERM: BP	GO:0070663~regulation of leukocyte proliferation	GO:0070663	regulation of leukocyte proliferation	4	4.65116	0.0352999	ENSG00000104998, ENSG00000166923, ENSG00000028137, ENSG00000175505	55	257	19277	5.45511	0.557715
GO TERM: BP	GO:0001558~regulation of cell growth	GO:0001558	regulation of cell growth	5	5.81395	0.0353278	ENSG00000153993, ENSG00000143858, ENSG00000138623, ENSG00000166923, ENSG00000041982	55	443	19277	3.95588	0.557715
GO TERM: BP	GO:0060907~positive regulation of macrophage cytokine production	GO:0060907	positive regulation of macrophage cytokine production	2	2.32558	0.0358216	ENSG00000138623, ENSG00000167191	55	13	19277	53.9217	0.55794
GO TERM: BP	GO:0048870~cell motility	GO:0048870	cell motility	11	12.7907	0.0362111	ENSG00000153993, ENSG00000147065, ENSG00000104998, ENSG00000211955, ENSG00000138623, ENSG00000166923, ENSG00000136167, ENSG00000196611, ENSG00000187957, ENSG00000157368, ENSG00000076716	55	1899	19277	2.03023	0.55794
GO TERM: BP	GO:0051674~localization of cell	GO:0051674	localization of cell	11	12.7907	0.0362111	ENSG00000153993, ENSG00000147065, ENSG00000104998, ENSG00000211955, ENSG00000138623, ENSG00000166923, ENSG00000136167, ENSG00000196611, ENSG00000187957, ENSG00000157368, ENSG00000076716	55	1899	19277	2.03023	0.55794
GO TERM: BP	GO:0071801~regulation of podosome assembly	GO:0071801	regulation of podosome assembly	2	2.32558	0.0385243	ENSG00000147065, ENSG00000136167	55	14	19277	50.0701	0.581029
GO TERM: BP	GO:0070141~response to UV-A	GO:0070141	response to UV-A	2	2.32558	0.0385243	ENSG00000196611, ENSG00000223802	55	14	19277	50.0701	0.581029
GO TERM: BP	GO:0048812~neuron projection morphogenesis	GO:0048812	neuron projection morphogenesis	6	6.97674	0.0386146	ENSG00000153993, ENSG00000132821, ENSG00000143858, ENSG00000138623, ENSG00000179915, ENSG00000105880	55	668	19277	3.14812	0.581029
GO TERM: BP	GO:0050730~regulation of peptidyl-tyrosine phosphorylation	GO:0050730	regulation of peptidyl-tyrosine phosphorylation	4	4.65116	0.0410513	ENSG00000166923, ENSG00000167191, ENSG00000157368, ENSG00000175505	55	273	19277	5.1354	0.610685
GO TERM: BP	GO:0043584~nose development	GO:0043584	nose development	2	2.32558	0.0412196	ENSG00000121039, ENSG00000105880	55	15	19277	46.7321	0.610685
GO TERM: BP	GO:0048858~cell projection morphogenesis	GO:0048858	cell projection morphogenesis	6	6.97674	0.0418385	ENSG00000153993, ENSG00000132821, ENSG00000143858, ENSG00000138623, ENSG00000179915, ENSG00000105880	55	683	19277	3.07898	0.615122
GO TERM: BP	GO:0032989~cellular component morphogenesis	GO:0032989	cellular component morphogenesis	8	9.30233	0.0434333	ENSG00000153993, ENSG00000132821, ENSG00000147065, ENSG00000143858, ENSG00000138623, ENSG00000179915, ENSG00000166923, ENSG00000105880	55	1168	19277	2.40062	0.626415
GO TERM: BP	GO:0010647~positive regulation of cell communication	GO:0010647	positive regulation of cell communication	11	12.7907	0.043438	ENSG00000134070, ENSG00000162188, ENSG00000188763, ENSG00000138623, ENSG00000179915, ENSG00000166923, ENSG00000167191, ENSG00000130829, ENSG00000157368, ENSG00000105880, ENSG00000175505	55	1959	19277	1.96804	0.626415
GO TERM: BP	GO:0071800~podosome assembly	GO:0071800	podosome assembly	2	2.32558	0.0439075	ENSG00000147065, ENSG00000136167	55	16	19277	43.8114	0.626415
GO TERM: BP	GO:0016310~phosphorylation	GO:0016310	phosphorylation	13	15.1163	0.0439076	ENSG00000155792, ENSG00000138623, ENSG00000179915, ENSG00000115896, ENSG00000167191, ENSG00000157368, ENSG00000175505, ENSG00000135842, ENSG00000134070, ENSG00000162188, ENSG00000161653, ENSG00000166923, ENSG00000130829	55	2525	19277	1.80451	0.626415
GO TERM: BP	GO:0023056~positive regulation of signaling	GO:0023056	positive regulation of signaling	11	12.7907	0.0443421	ENSG00000134070, ENSG00000162188, ENSG00000188763, ENSG00000138623, ENSG00000179915, ENSG00000166923, ENSG00000167191, ENSG00000130829, ENSG00000157368, ENSG00000105880, ENSG00000175505	55	1966	19277	1.96104	0.627963
GO TERM: BP	GO:0032990~cell part morphogenesis	GO:0032990	cell part morphogenesis	6	6.97674	0.0459189	ENSG00000153993, ENSG00000132821, ENSG00000143858, ENSG00000138623, ENSG00000179915, ENSG00000105880	55	701	19277	2.99992	0.641379
GO TERM: BP	GO:0060602~branch elongation of an epithelium	GO:0060602	branch elongation of an epithelium	2	2.32558	0.046588	ENSG00000121039, ENSG00000041982	55	17	19277	41.2342	0.641379
GO TERM: BP	GO:0002702~positive regulation of production of molecular mediator of immune response	GO:0002702	positive regulation of production of molecular mediator of immune response	3	3.48837	0.0465947	ENSG00000138623, ENSG00000167191, ENSG00000175505	55	123	19277	8.54856	0.641379
GO TERM: BP	GO:0040008~regulation of growth	GO:0040008	regulation of growth	6	6.97674	0.0466215	ENSG00000153993, ENSG00000143858, ENSG00000138623, ENSG00000166923, ENSG00000041982, ENSG00000130829	55	704	19277	2.98714	0.641379
GO TERM: BP	GO:0010935~regulation of macrophage cytokine production	GO:0010935	regulation of macrophage cytokine production	2	2.32558	0.0492611	ENSG00000138623, ENSG00000167191	55	18	19277	38.9434	0.663665
GO TERM: BP	GO:0010934~macrophage cytokine production	GO:0010934	macrophage cytokine production	2	2.32558	0.0492611	ENSG00000138623, ENSG00000167191	55	18	19277	38.9434	0.663665
GO TERM: BP	GO:0060485~mesenchyme development	GO:0060485	mesenchyme development	4	4.65116	0.0492752	ENSG00000112183, ENSG00000153993, ENSG00000121039, ENSG00000138623	55	294	19277	4.76858	0.663665
GO TERM: BP	GO:0007409~axonogenesis	GO:0007409	axonogenesis	5	5.81395	0.0499467	ENSG00000153993, ENSG00000132821, ENSG00000138623, ENSG00000179915, ENSG00000105880	55	496	19277	3.53317	0.664596

## Sheet: KEGG
Category	Term	ID	Pathway	Count	%	PValue	Genes	List Total	Pop Hits	Pop Total	Fold Enrichment	Benjamini padj
KEGG_PATHWAY	hsa04727:GABAergic synapse	hsa04727	GABAergic synapse	3	3.48837	0.0303213	ENSG00000162188, ENSG00000188338, ENSG00000115896	26	89	8112	10.5169	1
KEGG_PATHWAY	hsa04060:Cytokine-cytokine receptor interaction	hsa04060	Cytokine-cytokine receptor interaction	4	4.65116	0.0606819	ENSG00000104998, ENSG00000028137, ENSG00000157368, ENSG00000175505	26	295	8112	4.23051	1
KEGG_PATHWAY	hsa04550:Signaling pathways regulating pluripotency of stem cells	hsa04550	Signaling pathways regulating pluripotency of stem cells	3	3.48837	0.0711044	ENSG00000188763, ENSG00000130829, ENSG00000105880	26	143	8112	6.54545	1

## Sheet: Reactome
Category	Term	ID	Pathway	Count	%	PValue	Genes	List Total	Pop Hits	Pop Total	Fold Enrichment	Benjamini padj
REACTOME_PATHWAY	R-HSA-449147~Signaling by Interleukins	R-HSA-449147	Signaling by Interleukins	8	9.30233	0.000122955	ENSG00000134070, ENSG00000147065, ENSG00000104998, ENSG00000136167, ENSG00000196611, ENSG00000028137, ENSG00000157368, ENSG00000175505	28	462	10538	6.51701	0.0247139
REACTOME_PATHWAY	R-HSA-1280215~Cytokine Signaling in Immune system	R-HSA-1280215	Cytokine Signaling in Immune system	8	9.30233	0.00172095	ENSG00000134070, ENSG00000147065, ENSG00000104998, ENSG00000136167, ENSG00000196611, ENSG00000028137, ENSG00000157368, ENSG00000175505	28	715	10538	4.21099	0.172956
REACTOME_PATHWAY	R-HSA-447115~Interleukin-12 family signaling	R-HSA-447115	Interleukin-12 family signaling	3	3.48837	0.00925149	ENSG00000147065, ENSG00000104998, ENSG00000136167	28	57	10538	19.8083	0.61985
REACTOME_PATHWAY	R-HSA-381426~Regulation of Insulin-like Growth Factor (IGF) transport and uptake by Insulin-like Growth Factor Binding Proteins (IGFBPs)	R-HSA-381426	Regulation of Insulin-like Growth Factor (IGF) transport and uptake by Insulin-like Growth Factor Binding Proteins (IGFBPs)	3	3.48837	0.0403902	ENSG00000152583, ENSG00000196611, ENSG00000041982	28	125	10538	9.03257	1
