# Supplementary material for: Culture of Cancer Cells at Physiological Oxygen Levels Affects Gene Expression in a Cell-Type Specific Manner
Source: Preprints.org preprint supplement (doi:10.20944/preprints202208.0497.v1), 2022-08-29
Supplement: Supplementary file 6 [file Table S2 DEG list Huh-7.xlsx]

## Sheet: DEG Huh7 18% O2 vs 5% O2
Gene ID	log2FoldChange	FC	pvalue	padj	gene_name	gene_chr	gene_start	gene_end	gene_strand	gene_length	gene_biotype	gene_description	tf_family	Raw readcount 18% O2	Raw readout 5% O2	FPKM 18% O2	FPKM 5% O2
ENSG00000059804	-5.74412	53.5983	1.17e-25	2.73e-21	SLC2A3	12	7919230	7936275	-	6159	protein_coding	solute carrier family 2 member 3 [Source:HGNC Symbol;Acc:HGNC:11007]	-	20	1338	0.187368	10.6081
ENSG00000274276	5.14331	35.342	5.93e-19	6.89e-15	CBSL	21	6444869	6468040	-	4004	protein_coding	cystathionine-beta-synthase like [Source:HGNC Symbol;Acc:HGNC:51829]	-	317	11	4.56815	0.13415
ENSG00000136881	-3.86329	14.5534	1.67e-14	1.3e-10	BAAT	9	101360417	101383519	-	3389	protein_coding	bile acid-CoA:amino acid N-acyltransferase [Source:HGNC Symbol;Acc:HGNC:932]	-	32	580	0.54482	8.35698
ENSG00000163220	3.3714	10.3489	7.99e-13	4.65e-09	S100A9	1	153357854	153361027	+	577	protein_coding	S100 calcium binding protein A9 [Source:HGNC Symbol;Acc:HGNC:10499]	-	743	89	74.2998	7.53194
ENSG00000168743	-3.34255	10.1439	2.48e-12	1.15e-08	NPNT	4	105894775	106004027	+	6117	protein_coding	nephronectin [Source:HGNC Symbol;Acc:HGNC:27405]	-	62	782	0.584828	6.24254
ENSG00000186910	-3.20404	9.21537	9.8e-12	3.8e-08	SERPINA11	14	94442464	94452790	-	1476	protein_coding	serpin family A member 11 [Source:HGNC Symbol;Acc:HGNC:19193]	-	77	882	3.01009	29.1793
ENSG00000177459	-9.005	513.778	1.63e-11	5.41e-08	ERICH5	8	98064311	98093610	+	1761	protein_coding	glutamate rich 5 [Source:HGNC Symbol;Acc:HGNC:26823]	-	0	71	0	1.96876
ENSG00000112494	-3.02457	8.13741	1.37e-10	3.98e-07	UNC93A	6	167271169	167316019	+	2699	protein_coding	unc-93 homolog A [Source:HGNC Symbol;Acc:HGNC:12570]	-	69	698	1.4751	12.6283
ENSG00000131094	-3.12151	8.70298	2.74e-10	7.08e-07	C1QL1	17	44959693	44968071	-	1295	protein_coding	complement C1q like 1 [Source:HGNC Symbol;Acc:HGNC:24182]	-	36	390	1.60401	14.7058
ENSG00000153902	-2.77771	6.85763	4.25e-10	9.87e-07	LGI4	19	35124513	35142451	-	4532	protein_coding	leucine rich repeat LGI family member 4 [Source:HGNC Symbol;Acc:HGNC:18712]	-	324	2759	4.12506	29.7272
ENSG00000174640	-2.70592	6.52472	1.55e-09	3.27e-06	SLCO2A1	3	133928145	134052184	-	9834	protein_coding	solute carrier organic anion transporter family member 2A1 [Source:HGNC Symbol;Acc:HGNC:10955]	-	193	1564	1.13241	7.76604
ENSG00000244509	-2.65561	6.30114	1.84e-09	3.56e-06	APOBEC3C	22	39014083	39020352	+	2818	protein_coding	apolipoprotein B mRNA editing enzyme catalytic subunit 3C [Source:HGNC Symbol;Acc:HGNC:17353]	-	392	3067	8.02639	53.1454
ENSG00000128713	-8.47122	354.889	3.09e-09	5.28e-06	HOXD11	2	176104216	176109754	+	2110	protein_coding	homeobox D11 [Source:HGNC Symbol;Acc:HGNC:5134]	Homeobox	0	49	0	1.13398
ENSG00000163430	-2.8383	7.15179	3.18e-09	5.28e-06	FSTL1	3	120392293	120451253	-	8727	protein_coding	follistatin like 1 [Source:HGNC Symbol;Acc:HGNC:3972]	-	48	427	0.317359	2.38922
ENSG00000055957	-2.8667	7.29396	4.16e-09	6.45e-06	ITIH1	3	52777592	52792068	+	4544	protein_coding	inter-alpha-trypsin inhibitor heavy chain 1 [Source:HGNC Symbol;Acc:HGNC:6166]	-	39	354	0.495223	3.80415
ENSG00000146678	-2.66424	6.33894	7.76e-09	1.13e-05	IGFBP1	7	45888357	45893668	+	1653	protein_coding	insulin like growth factor binding protein 1 [Source:HGNC Symbol;Acc:HGNC:5469]	-	82	646	2.86231	19.0833
ENSG00000173262	-2.63529	6.21298	8.68e-09	1.19e-05	SLC2A14	12	7812512	7891148	-	5575	protein_coding	solute carrier family 2 member 14 [Source:HGNC Symbol;Acc:HGNC:18301]	-	93	718	0.962527	6.28887
ENSG00000100027	-4.24299	18.935	2.89e-08	3.73e-05	YPEL1	22	21697544	21735834	-	4713	protein_coding	yippee like 1 [Source:HGNC Symbol;Acc:HGNC:12845]	-	3	73	0.0367281	0.756342
ENSG00000265972	-2.72699	6.62073	3.41e-08	4.17e-05	TXNIP	1	145992435	145996600	-	3625	protein_coding	thioredoxin interacting protein [Source:HGNC Symbol;Acc:HGNC:16952]	-	33	272	0.525268	3.66399
ENSG00000145536	-2.60469	6.08262	3.78e-08	4.39e-05	ADAMTS16	5	5140330	5320304	+	5863	protein_coding	ADAM metallopeptidase with thrombospondin type 1 motif 16 [Source:HGNC Symbol;Acc:HGNC:17108]	-	55	416	0.541275	3.46471
ENSG00000275895	2.47004	5.54058	5.77e-08	6.39e-05	U2AF1L5	21	6484623	6499261	-	11119	protein_coding	U2 small nuclear RNA auxiliary factor 1 like 5 [Source:HGNC Symbol;Acc:HGNC:51830]	-	487	109	2.52719	0.478689
ENSG00000261428	3.65086	12.5608	6.79e-08	7.18e-05	AC097461.1	2	222566899	222569719	-	2821	antisense	novel transcript, antisense to SGPP2	-	62	6	1.26813	0.103858
ENSG00000188747	-5.09433	34.1622	7.22e-08	7.3e-05	NOXA1	9	137423350	137434406	+	1678	protein_coding	NADPH oxidase activator 1 [Source:HGNC Symbol;Acc:HGNC:10668]	-	1	47	0.0343861	1.36772
ENSG00000135220	-2.63957	6.23147	8.89e-08	8.61e-05	UGT2A3	4	68928463	68951791	-	3062	protein_coding	UDP glucuronosyltransferase family 2 member A3 [Source:HGNC Symbol;Acc:HGNC:28528]	-	33	256	0.621847	4.08251
ENSG00000096006	5.37702	41.5569	9.8e-08	9.11e-05	CRISP3	6	49727384	49744437	-	2247	protein_coding	cysteine rich secretory protein 3 [Source:HGNC Symbol;Acc:HGNC:16904]	-	38	1	0.975788	0.0217315
ENSG00000228589	2.55084	5.85974	1.05e-07	9.38e-05	SPCS2P4	1	28095742	28096422	-	681	processed_pseudogene	signal peptidase complex subunit 2 pseudogene 4 [Source:HGNC Symbol;Acc:HGNC:45237]	-	246	52	20.8431	3.72863
ENSG00000172638	-2.45411	5.47973	1.1e-07	9.51e-05	EFEMP2	11	65866441	65873592	-	5397	protein_coding	EGF containing fibulin extracellular matrix protein 2 [Source:HGNC Symbol;Acc:HGNC:3219]	-	74	504	0.791142	4.56006
ENSG00000172062	2.32296	5.00358	1.32e-07	0.000109974	SMN1	5	70925030	70953942	+	3097	protein_coding	survival of motor neuron 1, telomeric [Source:HGNC Symbol;Acc:HGNC:11117]	-	1125	279	20.9598	4.39902
ENSG00000146197	-2.31672	4.98199	1.97e-07	0.000157754	SCUBE3	6	35214419	35253079	+	7356	protein_coding	signal peptide, CUB domain and EGF like domain containing 3 [Source:HGNC Symbol;Acc:HGNC:13655]	-	165	1021	1.29425	6.77761
ENSG00000153246	-2.9983	7.99057	2.25e-07	0.000168941	PLA2R1	2	159932006	160062610	-	15357	protein_coding	phospholipase A2 receptor 1 [Source:HGNC Symbol;Acc:HGNC:9042]	-	12	120	0.0450868	0.381564
ENSG00000082684	-2.69818	6.48984	2.25e-07	0.000168941	SEMA5B	3	122909082	123028605	-	8517	protein_coding	semaphorin 5B [Source:HGNC Symbol;Acc:HGNC:10737]	-	22	178	0.149043	1.02053
ENSG00000274925	4.38976	20.9628	2.51e-07	0.0001796	ZKSCAN2-DT	16	25257952	25261066	+	3115	lincRNA	ZKSCAN2 divergent transcript [Source:HGNC Symbol;Acc:HGNC:53912]	-	36	2	0.666837	0.031352
ENSG00000090382	2.21464	4.64167	2.55e-07	0.0001796	LYZ	12	69348341	69354234	+	1764	protein_coding	lysozyme [Source:HGNC Symbol;Acc:HGNC:6740]	-	7703	2060	251.963	57.0245
ENSG00000244474	-4.00784	16.0872	2.88e-07	0.000193697	UGT1A4	2	233718778	233773299	+	2522	protein_coding	UDP glucuronosyltransferase family 1 member A4 [Source:HGNC Symbol;Acc:HGNC:12536]	-	3	62	0.0686359	1.20044
ENSG00000111799	-2.22156	4.66399	2.92e-07	0.000193697	COL12A1	6	75084326	75206051	-	12481	protein_coding	collagen type XII alpha 1 chain [Source:HGNC Symbol;Acc:HGNC:2188]	-	578	3347	2.6721	13.0948
ENSG00000163584	2.22745	4.68306	3.5e-07	0.000225768	RPL22L1	3	170864875	170870483	-	2326	protein_coding	ribosomal protein L22 like 1 [Source:HGNC Symbol;Acc:HGNC:27610]	-	1317	349	32.6701	7.3267
ENSG00000281398	2.3142	4.97329	4.55e-07	0.000285937	SNHG4	5	139274102	139284899	+	4469	lincRNA	small nucleolar RNA host gene 4 [Source:HGNC Symbol;Acc:HGNC:32964]	-	357	89	4.60928	0.972462
ENSG00000156222	-2.93022	7.62224	7.37e-07	0.000443367	SLC28A1	15	84884654	84945796	+	3445	protein_coding	solute carrier family 28 member 1 [Source:HGNC Symbol;Acc:HGNC:11001]	-	11	105	0.184238	1.48831
ENSG00000010932	-2.6905	6.45539	7.44e-07	0.000443367	FMO1	1	171248471	171285978	+	3602	protein_coding	flavin containing monooxygenase 1 [Source:HGNC Symbol;Acc:HGNC:3769]	-	18	145	0.288339	1.9657
ENSG00000135622	-2.99598	7.97772	7.87e-07	0.000455018	SEMA4F	2	74654228	74683853	+	6227	protein_coding	ssemaphorin 4F [Source:HGNC Symbol;Acc:HGNC:10734]	-	10	100	0.0926608	0.784177
ENSG00000099960	-2.77781	6.85809	8.02e-07	0.000455018	SLC7A4	22	21028718	21032840	-	2447	protein_coding	solute carrier family 7 member 4 [Source:HGNC Symbol;Acc:HGNC:11062]	-	14	120	0.330118	2.39464
ENSG00000153234	2.20838	4.62158	9.05e-07	0.000500952	NR4A2	2	156324432	156342348	-	3967	protein_coding	nuclear receptor subfamily 4 group A member 2 [Source:HGNC Symbol;Acc:HGNC:7981]	NGFIB-like	503	135	7.31612	1.66175
ENSG00000106541	2.11384	4.32841	9.8e-07	0.000529728	AGR2	7	16791811	16833433	-	2845	protein_coding	anterior gradient 2, protein disulphide isomerase family member [Source:HGNC Symbol;Acc:HGNC:328]	-	2075	595	42.0834	10.2124
ENSG00000130822	-2.12874	4.37336	1.17e-06	0.000611161	PNCK	X	153669730	153689010	-	5091	protein_coding	pregnancy up-regulated nonubiquitous CaM kinase [Source:HGNC Symbol;Acc:HGNC:13415]	-	239	1298	2.70875	12.4499
ENSG00000117228	-2.43008	5.38922	1.18e-06	0.000611161	GBP1	1	89052319	89065360	-	4992	protein_coding	guanylate binding protein 1 [Source:HGNC Symbol;Acc:HGNC:4182]	-	31	208	0.358313	2.03461
ENSG00000006659	-2.07011	4.19918	1.27e-06	0.000642578	LGALS14	19	39704306	39709444	+	1079	protein_coding	galectin 14 [Source:HGNC Symbol;Acc:HGNC:30054]	-	2329	12141	124.544	549.447
ENSG00000169247	4.17475	18.0603	1.3e-06	0.000642578	SH3TC2	5	148923639	149063163	-	15165	protein_coding	SH3 domain and tetratricopeptide repeats 2 [Source:HGNC Symbol;Acc:HGNC:29427]	-	31	2	0.117949	0.00643992
ENSG00000285877	-3.22908	9.37668	1.36e-06	0.000658073	AC007448.4	17	67244282	67273503	+	2511	antisense	novel transcript, antisense to HELZ	-	6	71	0.137873	1.38072
ENSG00000183248	-2.61919	6.14405	1.47e-06	0.000682413	PRR36	19	7868719	7874379	-	4456	protein_coding	proline rich 36 [Source:HGNC Symbol;Acc:HGNC:26172]	-	18	138	0.233079	1.51226
ENSG00000148702	-2.05977	4.1692	1.48e-06	0.000682413	HABP2	10	113550837	113589602	+	3657	protein_coding	hyaluronan binding protein 2 [Source:HGNC Symbol;Acc:HGNC:4798]	-	1319	6827	20.8111	91.1586
ENSG00000106823	-2.37444	5.18535	1.55e-06	0.000682413	ECM2	9	92493554	92536655	-	4916	protein_coding	extracellular matrix protein 2 [Source:HGNC Symbol;Acc:HGNC:3154]	-	33	213	0.387326	2.11573
ENSG00000120937	-2.04952	4.13968	1.57e-06	0.000682413	NPPB	1	11857464	11858931	-	694	protein_coding	natriuretic peptide B [Source:HGNC Symbol;Acc:HGNC:7940]	-	3078	15818	255.908	1112.97
ENSG00000205670	-2.85992	7.25975	1.58e-06	0.000682413	SMIM11A	21	34375480	34407866	+	4200	protein_coding	small integral membrane protein 11A [Source:HGNC Symbol;Acc:HGNC:1293]	-	11	100	0.151119	1.16264
ENSG00000092096	-7.76598	217.667	1.61e-06	0.000682413	SLC22A17	14	23346306	23352912	-	4278	protein_coding	solute carrier family 22 member 17 [Source:HGNC Symbol;Acc:HGNC:23095]	-	0	30	0	0.342431
ENSG00000205572	2.3401	5.06336	1.61e-06	0.000682413	SERF1B	5	70025247	70043113	+	3051	protein_coding	small EDRK-rich factor 1B [Source:HGNC Symbol;Acc:HGNC:10756]	-	184	45	3.47977	0.720217
ENSG00000158516	-2.77818	6.85988	1.93e-06	0.000799327	CPA2	7	130266827	130289798	+	1829	protein_coding	carboxypeptidase A2 [Source:HGNC Symbol;Acc:HGNC:2297]	-	12	103	0.378567	2.7499
ENSG00000116985	-2.19348	4.57406	2e-06	0.000815062	BMP8B	1	39757182	39788861	-	4822	protein_coding	bone morphogenetic protein 8b [Source:HGNC Symbol;Acc:HGNC:1075]	-	73	415	0.873515	4.20256
ENSG00000205336	-2.58751	6.01061	2.08e-06	0.000833555	ADGRG1	16	57610652	57665580	+	8659	protein_coding	adhesion G protein-coupled receptor G1 [Source:HGNC Symbol;Acc:HGNC:4512]	-	18	135	0.119944	0.761305
ENSG00000123643	-2.01432	4.03989	2.47e-06	0.000973446	SLC36A1	5	151437046	151492381	+	6980	protein_coding	solute carrier family 36 member 1 [Source:HGNC Symbol;Acc:HGNC:18761]	-	1102	5527	9.10964	38.6658
ENSG00000272138	-4.67048	25.4656	2.59e-06	0.000985985	LINC01607	8	79768142	79802842	+	789	lincRNA	long intergenic non-protein coding RNA 1607 [Source:HGNC Symbol;Acc:HGNC:51660]	-	1	35	0.0731304	2.16613
ENSG00000100033	4.07889	16.8993	2.59e-06	0.000985985	PRODH	22	18912777	18936553	-	8776	protein_coding	proline dehydrogenase 1 [Source:HGNC Symbol;Acc:HGNC:9453]	-	29	2	0.190667	0.0111282
ENSG00000166984	-2.86011	7.26072	2.84e-06	0.00106555	TCP10L2	6	167146414	167196913	+	4332	protein_coding	t-complex 10 like 2 [Source:HGNC Symbol;Acc:HGNC:21254]	-	10	91	0.133195	1.02576
ENSG00000260306	3.75408	13.4924	2.93e-06	0.0010813	AC092375.2	16	21794095	21795759	-	1665	lincRNA	novel transcript	-	34	3	1.17826	0.0879832
ENSG00000170927	-2.27598	4.84325	3.35e-06	0.00121824	PKHD1	6	51615300	52087625	-	17454	protein_coding	PKHD1, fibrocystin/polyductin [Source:HGNC Symbol;Acc:HGNC:9016]	-	38	229	0.125621	0.640669
ENSG00000223459	-2.00454	4.01261	3.55e-06	0.0012688	TCAF1P1	7	143598039	143604839	+	2233	unprocessed_pseudogene	TRPM8 channel associated factor 1 pseudogene 1 [Source:HGNC Symbol;Acc:HGNC:33604]	-	394	1963	10.1808	42.9264
ENSG00000236008	-7.61471	196	3.61e-06	0.00127028	LINC01814	2	8506446	8592903	-	12173	lincRNA	long intergenic non-protein coding RNA 1814 [Source:HGNC Symbol;Acc:HGNC:52618]	-	0	27	0	0.108308
ENSG00000145934	2.35532	5.11709	3.76e-06	0.00130393	TENM2	5	167284799	168264157	+	11042	protein_coding	teneurin transmembrane protein 2 [Source:HGNC Symbol;Acc:HGNC:29943]	-	120	29	0.627059	0.128246
ENSG00000150551	-2.99003	7.94489	4.15e-06	0.00141771	LYPD1	2	132644853	132671579	-	2412	protein_coding	LY6/PLAUR domain containing 1 [Source:HGNC Symbol;Acc:HGNC:28431]	-	7	70	0.167454	1.41714
ENSG00000073008	-1.93856	3.83322	5.1e-06	0.00171909	PVR	19	44643798	44663583	+	3519	protein_coding	poliovirus receptor [Source:HGNC Symbol;Acc:HGNC:9705]	-	4374	20814	71.719	288.821
ENSG00000185338	2.12298	4.35593	5.2e-06	0.00171909	SOCS1	16	11254405	11256200	-	1796	protein_coding	suppressor of cytokine signaling 1 [Source:HGNC Symbol;Acc:HGNC:19383]	-	246	70	7.90321	1.9032
ENSG00000230021	3.97621	15.7383	5.25e-06	0.00171909	AL669831.3	1	586071	827796	-	5495	transcribed_processed_pseudogene	uncharacterized LOC101928626 [Source:NCBI gene;Acc:101928626]	-	27	2	0.283512	0.0177728
ENSG00000268104	2.02888	4.08087	5.49e-06	0.00177297	SLC6A14	X	116436622	116461458	+	4520	protein_coding	solute carrier family 6 member 14 [Source:HGNC Symbol;Acc:HGNC:11047]	-	454	138	5.79552	1.49085
ENSG00000004468	3.27655	9.69038	6.09e-06	0.00193411	CD38	4	15778275	15853230	+	6855	protein_coding	CD38 molecule [Source:HGNC Symbol;Acc:HGNC:1667]	-	40	5	0.336688	0.0356168
ENSG00000116701	-2.02989	4.08374	6.21e-06	0.00193411	NCF2	1	183555563	183590876	-	2928	protein_coding	neutrophil cytosolic factor 2 [Source:HGNC Symbol;Acc:HGNC:7661]	-	109	553	2.14798	9.22246
ENSG00000138131	-1.93425	3.82181	6.24e-06	0.00193411	LOXL4	10	98247690	98268250	-	3653	protein_coding	lysyl oxidase like 4 [Source:HGNC Symbol;Acc:HGNC:17171]	-	772	3663	12.1939	48.9644
ENSG00000167080	-1.94104	3.83982	6.39e-06	0.00195596	B4GALNT2	17	49132460	49176840	+	8961	protein_coding	beta-1,4-N-acetyl-galactosaminyltransferase 2 [Source:HGNC Symbol;Acc:HGNC:24136]	-	486	2317	3.12935	12.6259
ENSG00000141854	-2.84267	7.17349	6.52e-06	0.00196922	MISP3	19	14072536	14075062	+	2354	protein_coding	MISP family member 3 [Source:HGNC Symbol;Acc:HGNC:26963]	-	9	81	0.220603	1.68024
ENSG00000148180	-1.91232	3.76415	6.74e-06	0.00200909	GSN	9	121207794	121332843	+	11018	protein_coding	gelsolin [Source:HGNC Symbol;Acc:HGNC:4620]	-	3778	17654	19.7849	78.2408
ENSG00000164946	2.66722	6.35204	7.8e-06	0.0022966	FREM1	9	14734666	14910995	-	10762	protein_coding	FRAS1 related extracellular matrix 1 [Source:HGNC Symbol;Acc:HGNC:23399]	-	62	12	0.33241	0.0544479
ENSG00000111249	-1.97199	3.92308	8.4e-06	0.00244026	CUX2	12	111034024	111350554	+	7648	protein_coding	cut like homeobox 2 [Source:HGNC Symbol;Acc:HGNC:19347]	CUT	157	765	1.18448	4.88435
ENSG00000127585	-2.161	4.47226	9.62e-06	0.00276161	FBXL16	16	692498	705829	-	3989	protein_coding	F-box and leucine rich repeat protein 16 [Source:HGNC Symbol;Acc:HGNC:14150]	-	39	217	0.564125	2.65637
ENSG00000186198	1.93229	3.81661	9.94e-06	0.00277037	SLC51B	15	65045370	65053396	+	940	protein_coding	solute carrier family 51 beta subunit [Source:HGNC Symbol;Acc:HGNC:29956]	-	689	224	42.2928	11.6362
ENSG00000100311	-2.06198	4.17559	9.96e-06	0.00277037	PDGFB	22	39223359	39244751	-	3761	protein_coding	platelet derived growth factor subunit B [Source:HGNC Symbol;Acc:HGNC:8800]	-	63	327	0.966523	4.24558
ENSG00000121361	-2.00856	4.02381	1e-05	0.00277037	KCNJ8	12	21764955	21775581	-	2484	protein_coding	potassium voltage-gated channel subfamily J member 8 [Source:HGNC Symbol;Acc:HGNC:6269]	-	85	425	1.97443	8.35469
ENSG00000203875	1.87528	3.66872	1.06e-05	0.00289657	SNHG5	6	85660950	85678748	-	2806	processed_transcript	small nucleolar RNA host gene 5 [Source:HGNC Symbol;Acc:HGNC:21026]	-	3727	1261	76.6384	21.9442
ENSG00000241343	2.10112	4.29042	1.09e-05	0.00290394	RPL36A	X	101390824	101396154	+	3964	protein_coding	ribosomal protein L36a [Source:HGNC Symbol;Acc:HGNC:10359]	-	187	54	2.72197	0.665201
ENSG00000213145	4.83147	28.4721	1.09e-05	0.00290394	CRIP1	14	105486317	105488947	+	2485	protein_coding	cysteine rich protein 1 [Source:HGNC Symbol;Acc:HGNC:2360]	-	26	1	0.603701	0.0196502
ENSG00000250508	-2.14093	4.41047	1.11e-05	0.00293427	AP000808.1	11	68870664	68874542	+	3252	lincRNA	uncharacterized LOC105369364 [Source:NCBI gene;Acc:105369364]	-	39	214	0.691973	3.21334
ENSG00000010319	-2.00486	4.0135	1.2e-05	0.00311384	SEMA3G	3	52433053	52445085	-	5011	protein_coding	semaphorin 3G [Source:HGNC Symbol;Acc:HGNC:30400]	-	80	399	0.921172	3.88814
ENSG00000216588	-2.37582	5.19031	1.21e-05	0.00311384	IGSF23	19	44613630	44636781	+	1347	protein_coding	immunoglobulin superfamily member 23 [Source:HGNC Symbol;Acc:HGNC:40040]	-	19	123	0.813881	4.45893
ENSG00000148908	2.09238	4.26452	1.22e-05	0.00311384	RGS10	10	119499828	119542708	-	1252	protein_coding	regulator of G protein signaling 10 [Source:HGNC Symbol;Acc:HGNC:9992]	-	179	52	8.24942	2.02811
ENSG00000274615	-2.69244	6.46405	1.29e-05	0.00326858	AC233968.1	17	38078262	38124770	+	1300	unprocessed_pseudogene	aminopeptidase puromycin sensitive pseudogene [Source:NCBI gene;Acc:440434]	-	10	81	0.443845	3.04253
ENSG00000101230	2.33958	5.06154	1.46e-05	0.00363951	ISM1	20	13221771	13300651	+	2593	protein_coding	isthmin 1 [Source:HGNC Symbol;Acc:HGNC:16213]	-	82	20	1.82468	0.376635
ENSG00000259556	3.52541	11.5147	1.47e-05	0.00363951	AC090971.3	15	51919073	51930627	-	1041	unprocessed_pseudogene	Leo1, Paf1/RNA polymerase II complex component, homolog (S. cerevisiae) (LEO1) pseudogene	-	29	3	1.60739	0.140722
ENSG00000047457	-1.83702	3.57272	1.51e-05	0.00365443	CP	3	149162410	149222055	-	7296	protein_coding	ceruloplasmin [Source:HGNC Symbol;Acc:HGNC:2295]	-	1716	7611	13.5709	50.9389
ENSG00000111331	-1.90251	3.73863	1.51e-05	0.00365443	OAS3	12	112938352	112973249	+	8251	protein_coding	2'-5'-oligoadenylate synthetase 3 [Source:HGNC Symbol;Acc:HGNC:8088]	-	171	794	1.19582	4.69901
ENSG00000173212	-2.65643	6.30472	1.54e-05	0.00365443	MAB21L3	1	116111755	116135240	+	3256	protein_coding	mab-21 like 3 [Source:HGNC Symbol;Acc:HGNC:26787]	-	10	79	0.177211	1.18477
ENSG00000226054	-2.3522	5.10601	1.54e-05	0.00365443	MEMO1P1	21	36130489	36131376	+	888	processed_pseudogene	mediator of cell motility 1 pseudogene 1 [Source:HGNC Symbol;Acc:HGNC:23274]	-	19	121	1.23457	6.65373
ENSG00000233718	4.77514	27.3817	1.58e-05	0.0037	MYCNOS	2	15921037	15942249	-	2413	antisense	MYCN opposite strand [Source:HGNC Symbol;Acc:HGNC:16911]	-	25	1	0.597802	0.0202365
ENSG00000138115	-2.2139	4.63928	1.64e-05	0.00382108	CYP2C8	10	95036772	95069497	-	2571	protein_coding	cytochrome P450 family 2 subfamily C member 8 [Source:HGNC Symbol;Acc:HGNC:2622]	-	27	156	0.60595	2.96289
ENSG00000224321	-1.87262	3.66198	1.91e-05	0.00439735	RPL12P14	1	15792796	15793285	+	490	processed_pseudogene	ribosomal protein L12 pseudogene 14 [Source:HGNC Symbol;Acc:HGNC:36495]	-	188	855	22.1379	85.2046
ENSG00000173918	-7.38466	167.111	1.96e-05	0.00442037	C1QTNF1	17	79022814	79049788	+	4854	protein_coding	C1q and TNF related 1 [Source:HGNC Symbol;Acc:HGNC:14324]	-	0	23	0	0.231377
ENSG00000238062	7.42076	171.345	1.96e-05	0.00442037	SPATA3-AS1	2	230984368	230996032	-	3693	lincRNA	SPATA3 antisense RNA 1 (head to head) [Source:HGNC Symbol;Acc:HGNC:28013]	-	19	0	0.296858	0
ENSG00000185483	2.09472	4.27144	2.02e-05	0.00451716	ROR1	1	63774022	64181498	+	6715	protein_coding	receptor tyrosine kinase like orphan receptor 1 [Source:HGNC Symbol;Acc:HGNC:10256]	-	138	40	1.18579	0.290875
ENSG00000279278	3.47498	11.1192	2.06e-05	0.00455298	AC245060.6	22	22264601	22273020	+	8420	lincRNA	novel transcript	-	28	3	0.191876	0.0173981
ENSG00000099284	-1.85307	3.61269	2.14e-05	0.00469076	H2AFY2	10	70052796	70112280	+	1980	protein_coding	H2A histone family member Y2 [Source:HGNC Symbol;Acc:HGNC:14453]	-	220	987	6.4111	24.3414
ENSG00000128710	-4.34997	20.3925	2.3e-05	0.00488621	HOXD10	2	176108790	176119942	+	2692	protein_coding	homeobox D10 [Source:HGNC Symbol;Acc:HGNC:5133]	Homeobox	1	28	0.0214338	0.507897
ENSG00000018625	-4.40035	21.1173	2.3e-05	0.00488621	ATP1A2	1	160115759	160143591	+	6298	protein_coding	ATPase Na+/K+ transporting subunit alpha 2 [Source:HGNC Symbol;Acc:HGNC:800]	-	1	29	0.00916162	0.224848
ENSG00000185245	3.26787	9.63223	2.31e-05	0.00488621	GP1BA	17	4932297	4935030	+	2501	protein_coding	glycoprotein Ib platelet subunit alpha [Source:HGNC Symbol;Acc:HGNC:4439]	-	32	4	0.738263	0.0780979
ENSG00000140505	-3.86294	14.5499	2.31e-05	0.00488621	CYP1A2	15	74748844	74756202	+	2728	protein_coding	cytochrome P450 family 1 subfamily A member 2 [Source:HGNC Symbol;Acc:HGNC:2596]	-	2	38	0.042302	0.680193
ENSG00000167552	-1.80882	3.50355	2.37e-05	0.00495647	TUBA1A	12	49184796	49189324	-	3421	protein_coding	tubulin alpha 1a [Source:HGNC Symbol;Acc:HGNC:20766]	-	523	2275	8.82112	32.4729
ENSG00000118507	-1.79588	3.47226	2.58e-05	0.0053286	AKAP7	6	131135666	131283535	+	4394	protein_coding	A-kinase anchoring protein 7 [Source:HGNC Symbol;Acc:HGNC:377]	-	669	2884	8.78498	32.05
ENSG00000147804	2.70113	6.50312	2.59e-05	0.0053286	SLC39A4	8	144409742	144416895	-	5033	protein_coding	solute carrier family 39 member 4 [Source:HGNC Symbol;Acc:HGNC:17129]	-	53	10	0.607609	0.097021
ENSG00000164761	1.8174	3.52444	2.64e-05	0.00537893	TNFRSF11B	8	118923557	118952200	-	2827	protein_coding	TNF receptor superfamily member 11b [Source:HGNC Symbol;Acc:HGNC:11909]	-	923	325	18.8387	5.61372
ENSG00000242445	7.34322	162.379	3.05e-05	0.00610554	RPL7AP11	3	121494110	121494908	+	799	processed_pseudogene	ribosomal protein L7a pseudogene 11 [Source:HGNC Symbol;Acc:HGNC:35242]	-	18	0	1.29987	0
ENSG00000273143	7.34322	162.379	3.05e-05	0.00610554	AL355512.1	10	110428840	110496204	-	628	lincRNA	novel transcript	-	18	0	1.65382	0
ENSG00000137642	-1.82492	3.54287	3.07e-05	0.0061095	SORL1	11	121452203	121633693	+	19449	protein_coding	sortilin related receptor 1 [Source:HGNC Symbol;Acc:HGNC:11185]	-	180	792	0.534011	1.98848
ENSG00000196132	-3.17627	9.0397	3.15e-05	0.00620919	MYT1	20	64102394	64242253	+	6427	protein_coding	myelin transcription factor 1 [Source:HGNC Symbol;Acc:HGNC:7622]	zf-C2HC	4	46	0.0359109	0.349496
ENSG00000106025	2.1077	4.31002	3.3e-05	0.00644933	TSPAN12	7	120787320	120858402	-	3368	protein_coding	tetraspanin 12 [Source:HGNC Symbol;Acc:HGNC:21641]	-	108	31	1.85023	0.449451
ENSG00000163993	1.77897	3.43181	3.33e-05	0.00644933	S100P	4	6693069	6697170	+	1280	protein_coding	S100 calcium binding protein P [Source:HGNC Symbol;Acc:HGNC:10504]	-	1377	498	62.0725	18.9982
ENSG00000167995	-4.29776	19.6678	3.37e-05	0.00644933	BEST1	11	61949821	61965515	+	8930	protein_coding	bestrophin 1 [Source:HGNC Symbol;Acc:HGNC:12703]	-	1	27	0.00646135	0.14764
ENSG00000142227	-1.9691	3.91525	3.38e-05	0.00644933	EMP3	19	48321509	48330553	+	1667	protein_coding	epithelial membrane protein 3 [Source:HGNC Symbol;Acc:HGNC:3335]	-	53	258	1.83449	7.55748
ENSG00000058085	-2.40388	5.29223	3.46e-05	0.006547	LAMC2	1	183186238	183244900	+	6543	protein_coding	laminin subunit gamma 2 [Source:HGNC Symbol;Acc:HGNC:6493]	-	13	86	0.114641	0.641822
ENSG00000232956	1.78673	3.45033	3.66e-05	0.00686381	SNHG15	7	44983023	44986961	-	3647	lincRNA	small nucleolar RNA host gene 15 [Source:HGNC Symbol;Acc:HGNC:27797]	-	848	305	13.4164	4.08373
ENSG00000167680	1.76047	3.38809	3.95e-05	0.0073225	SEMA6B	19	4542593	4559808	-	4412	protein_coding	semaphorin 6B [Source:HGNC Symbol;Acc:HGNC:10739]	-	1485	544	19.4207	6.02083
ENSG00000232445	1.96752	3.91096	3.97e-05	0.0073225	AC006329.1	7	101308346	101310985	+	705	antisense	novel transcript	-	161	51	13.1769	3.53243
ENSG00000158270	-1.77618	3.42518	4.55e-05	0.0082138	COLEC12	18	316740	500722	-	7340	protein_coding	collectin subfamily member 12 [Source:HGNC Symbol;Acc:HGNC:16016]	-	213	906	1.6744	6.02733
ENSG00000127084	-1.74767	3.35817	4.6e-05	0.0082138	FGD3	9	92947451	93036236	+	5890	protein_coding	FYVE, RhoGEF and PH domain containing 3 [Source:HGNC Symbol;Acc:HGNC:16027]	-	401	1672	3.92829	13.8616
ENSG00000159261	-2.00672	4.01868	4.61e-05	0.0082138	CLDN14	21	36460621	36576569	-	2853	protein_coding	claudin 14 [Source:HGNC Symbol;Acc:HGNC:2035]	-	37	185	0.748298	3.16638
ENSG00000168955	-2.07378	4.20987	4.61e-05	0.0082138	TM4SF20	2	227362156	227381995	-	2757	protein_coding	transmembrane 4 L six family member 20 [Source:HGNC Symbol;Acc:HGNC:26230]	-	29	152	0.606927	2.69215
ENSG00000160963	1.91668	3.77552	4.63e-05	0.0082138	COL26A1	7	101362820	101559024	+	3156	protein_coding	collagen type XXVI alpha 1 chain [Source:HGNC Symbol;Acc:HGNC:18038]	-	198	65	3.61995	1.0057
ENSG00000197142	-1.88788	3.70092	4.76e-05	0.00835077	ACSL5	10	112374018	112428380	+	4236	protein_coding	acyl-CoA synthetase long chain family member 5 [Source:HGNC Symbol;Acc:HGNC:16526]	-	65	299	0.885385	3.44674
ENSG00000254506	-7.25424	152.667	4.78e-05	0.00835077	AP003080.1	11	101584295	101595156	+	2371	transcribed_processed_pseudogene	novel pseudogene	-	0	21	0	0.432495
ENSG00000165953	-2.46462	5.51982	4.83e-05	0.00838192	SERPINA12	14	94487274	94517844	-	2276	protein_coding	serpin family A member 12 [Source:HGNC Symbol;Acc:HGNC:18359]	-	11	76	0.278866	1.63055
ENSG00000134323	1.79648	3.47372	4.93e-05	0.00841758	MYCN	2	15940564	15947007	+	2602	protein_coding	MYCN proto-oncogene, bHLH transcription factor [Source:HGNC Symbol;Acc:HGNC:7559]	bHLH	448	160	9.93449	3.00266
ENSG00000164845	-4.2436	18.9431	4.96e-05	0.00841758	FAM86FP	12	8232512	8242948	-	994	transcribed_unprocessed_pseudogene	family with sequence similarity 86 member F, pseudogene [Source:HGNC Symbol;Acc:HGNC:42357]	-	1	26	0.0580482	1.27726
ENSG00000164049	4.59159	24.1105	4.96e-05	0.00841758	FBXW12	3	48372219	48401259	+	3488	protein_coding	F-box and WD repeat domain containing 12 [Source:HGNC Symbol;Acc:HGNC:20729]	-	22	1	0.363933	0.0139996
ENSG00000166165	-1.70956	3.2706	5.01e-05	0.00843368	CKB	14	103519659	103523111	-	2669	protein_coding	creatine kinase B [Source:HGNC Symbol;Acc:HGNC:1991]	-	37541	152419	811.582	2788.58
ENSG00000219607	-2.16017	4.46966	5.07e-05	0.00848114	PPP1R3G	6	5084581	5089487	+	4907	protein_coding	protein phosphatase 1 regulatory subunit 3G [Source:HGNC Symbol;Acc:HGNC:14945]	-	21	117	0.246932	1.16429
ENSG00000234741	1.71247	3.27721	5.15e-05	0.00854759	GAS5	1	173863900	173868882	-	3631	processed_transcript	growth arrest specific 5 [Source:HGNC Symbol;Acc:HGNC:16355]	-	5267	1995	83.6974	26.8293
ENSG00000104537	-1.7423	3.34569	5.46e-05	0.00891928	ANXA13	8	123680794	123737407	-	3806	protein_coding	annexin A13 [Source:HGNC Symbol;Acc:HGNC:536]	-	298	1238	4.51775	15.8834
ENSG00000164362	1.87374	3.66482	5.48e-05	0.00891928	TERT	5	1253147	1295069	-	4602	protein_coding	telomerase reverse transcriptase [Source:HGNC Symbol;Acc:HGNC:11730]	-	204	69	2.55775	0.732142
ENSG00000007237	2.12915	4.3746	5.49e-05	0.00891928	GAS7	17	9910609	10198551	-	10100	protein_coding	growth arrest specific 7 [Source:HGNC Symbol;Acc:HGNC:4169]	-	92	26	0.525583	0.125703
ENSG00000111452	-1.71138	3.27474	5.82e-05	0.00940305	ADGRD1	12	130953907	131141469	+	14718	protein_coding	adhesion G protein-coupled receptor D1 [Source:HGNC Symbol;Acc:HGNC:19893]	-	670	2724	2.62664	9.03756
ENSG00000147869	-1.92081	3.78635	5.88e-05	0.00943614	CER1	9	14719724	14722717	-	1215	protein_coding	cerberus 1, DAN family BMP antagonist [Source:HGNC Symbol;Acc:HGNC:1862]	-	48	226	2.2795	9.08291
ENSG00000228278	1.74452	3.35084	6.32e-05	0.0100686	ORM2	9	114329869	114333252	+	760	protein_coding	orosomucoid 2 [Source:HGNC Symbol;Acc:HGNC:8499]	-	613	227	46.5395	14.585
ENSG00000123561	-1.80349	3.49064	6.46e-05	0.0102234	SERPINA7	X	106032442	106038738	-	2744	protein_coding	serpin family A member 7 [Source:HGNC Symbol;Acc:HGNC:11583]	-	98	425	2.06071	7.56306
ENSG00000135074	-1.78524	3.44676	6.63e-05	0.0104168	ADAM19	5	157395534	157575775	-	7704	protein_coding	ADAM metallopeptidase domain 19 [Source:HGNC Symbol;Acc:HGNC:197]	-	110	471	0.823856	2.98537
ENSG00000055163	-1.90154	3.73612	6.69e-05	0.0104431	CYFIP2	5	157266079	157395595	+	10498	protein_coding	cytoplasmic FMR1 interacting protein 2 [Source:HGNC Symbol;Acc:HGNC:13760]	-	48	223	0.263821	1.03727
ENSG00000158856	-1.69833	3.24524	6.83e-05	0.0105891	DMTN	8	22048995	22082527	+	4473	protein_coding	dematin actin binding protein [Source:HGNC Symbol;Acc:HGNC:3382]	-	549	2212	7.08188	24.1479
ENSG00000021300	1.76942	3.40916	6.89e-05	0.0106041	PLEKHB1	11	73646178	73662819	+	4933	protein_coding	pleckstrin homology domain containing B1 [Source:HGNC Symbol;Acc:HGNC:19079]	-	382	139	4.46814	1.37593
ENSG00000142173	-2.54778	5.84733	7.11e-05	0.0108078	COL6A2	21	46098097	46132849	+	5386	protein_coding	collagen type VI alpha 2 chain [Source:HGNC Symbol;Acc:HGNC:2212]	-	9	66	0.0964164	0.598371
ENSG00000225200	2.35408	5.1127	7.11e-05	0.0108078	AC246787.1	14	105978520	105979146	-	627	processed_pseudogene	ribosomal protein S8 (RPS8) pseudogene	-	54	13	4.96937	1.01244
ENSG00000117226	-2.03623	4.10173	7.22e-05	0.0108871	GBP3	1	89006666	89022894	-	4297	protein_coding	guanylate binding protein 3 [Source:HGNC Symbol;Acc:HGNC:4184]	-	28	143	0.375982	1.62504
ENSG00000226180	2.42278	5.36202	7.33e-05	0.0108871	AC010536.1	16	87693537	87696147	-	2611	lincRNA	uncharacterized LOC100129215 [Source:NCBI gene;Acc:100129215]	-	48	11	1.06074	0.205721
ENSG00000087494	-4.18732	18.2184	7.35e-05	0.0108871	PTHLH	12	27958084	27972705	-	3377	protein_coding	parathyroid hormone like hormone [Source:HGNC Symbol;Acc:HGNC:9607]	-	1	25	0.0170861	0.361495
ENSG00000235027	4.52482	23.0201	7.35e-05	0.0108871	AC068580.3	11	1760348	1762486	+	2015	antisense	novel transcript	-	21	1	0.601339	0.0242336
ENSG00000205746	2.08411	4.24014	7.46e-05	0.0109721	AC126755.1	16	18334400	18352476	-	6804	transcribed_unprocessed_pseudogene	polycystic kidney disease 1 (autosomal dominant) (PKD1) pseudogene	-	96	28	0.814108	0.200949
ENSG00000175170	-7.18432	145.444	7.55e-05	0.0109774	FAM182B	20	25763466	25868225	-	3854	lincRNA	family with sequence similarity 182 member B [Source:HGNC Symbol;Acc:HGNC:34503]	-	0	20	0	0.253403
ENSG00000183638	7.26128	153.414	7.55e-05	0.0109774	RP1L1	8	10606349	10712187	-	8881	protein_coding	RP1 like 1 [Source:HGNC Symbol;Acc:HGNC:15946]	-	17	0	0.110449	0
ENSG00000099994	1.79399	3.46773	7.64e-05	0.0110317	SUSD2	22	24181259	24189110	+	5279	protein_coding	sushi domain containing 2 [Source:HGNC Symbol;Acc:HGNC:30667]	-	288	103	3.14786	0.952749
ENSG00000210144	1.93948	3.83567	7.85e-05	0.0112629	MT-TY	MT	5826	5891	-	66	Mt_tRNA	mitochondrially encoded tRNA tyrosine [Source:HGNC Symbol;Acc:HGNC:7502]	-	127	41	111.029	30.3342
ENSG00000224631	1.72719	3.31082	8.02e-05	0.0113926	RPS27AP16	16	61055399	61055964	-	566	transcribed_processed_pseudogene	ribosomal protein S27a pseudogene 16 [Source:HGNC Symbol;Acc:HGNC:36855]	-	531	199	54.1319	17.1684
ENSG00000132703	-3.70309	13.0239	8.1e-05	0.0113926	APCS	1	159587825	159588865	+	926	protein_coding	amyloid P component, serum [Source:HGNC Symbol;Acc:HGNC:584]	-	2	34	0.124622	1.79292
ENSG00000229314	1.68402	3.21323	8.1e-05	0.0113926	ORM1	9	114323056	114326475	+	901	protein_coding	orosomucoid 1 [Source:HGNC Symbol;Acc:HGNC:8498]	-	1398	540	89.5277	29.2659
ENSG00000128510	2.30137	4.92925	8.13e-05	0.0113926	CPA4	7	130293134	130324180	+	3958	protein_coding	carboxypeptidase A4 [Source:HGNC Symbol;Acc:HGNC:15740]	-	60	15	0.874682	0.185058
ENSG00000157703	-1.85884	3.62715	8.4e-05	0.0116916	SVOPL	7	138594285	138701352	-	6302	protein_coding	SVOP like [Source:HGNC Symbol;Acc:HGNC:27034]	-	51	230	0.466946	1.78214
ENSG00000086619	-2.03719	4.10446	8.61e-05	0.011918	ERO1B	1	236215555	236281985	-	5361	protein_coding	endoplasmic reticulum oxidoreductase 1 beta [Source:HGNC Symbol;Acc:HGNC:14355]	-	27	138	0.290598	1.25697
ENSG00000056972	-1.75094	3.36578	8.82e-05	0.0121308	TRAF3IP2	6	111556454	111606278	-	6553	protein_coding	TRAF3 interacting protein 2 [Source:HGNC Symbol;Acc:HGNC:1343]	-	116	485	1.02139	3.61405
ENSG00000122711	2.39248	5.25057	9.06e-05	0.0123866	SPINK4	9	33218365	33248567	+	654	protein_coding	serine peptidase inhibitor, Kazal type 4 [Source:HGNC Symbol;Acc:HGNC:16646]	-	47	11	4.14663	0.821311
ENSG00000237015	2.05924	4.16767	9.19e-05	0.0124639	AL031186.1	22	29260889	29262037	+	385	antisense	novel transcript	-	91	27	13.6382	3.42449
ENSG00000186994	-3.04544	8.256	9.22e-05	0.0124639	KANK3	19	8322584	8343262	-	3594	protein_coding	KN motif and ankyrin repeat domains 3 [Source:HGNC Symbol;Acc:HGNC:24796]	-	4	42	0.064218	0.570642
ENSG00000128591	-1.69761	3.24364	9.49e-05	0.0127602	FLNC	7	128830377	128859274	+	9280	protein_coding	filamin C [Source:HGNC Symbol;Acc:HGNC:3756]	-	214	862	1.33058	4.53578
ENSG00000135643	-1.90742	3.75139	9.59e-05	0.01281	KCNMB4	12	70366276	70434292	+	4874	protein_coding	potassium calcium-activated channel subfamily M regulatory beta subunit 4 [Source:HGNC Symbol;Acc:HGNC:6289]	-	39	182	0.461694	1.82339
ENSG00000202337	1.82775	3.54983	0.000103671	0.0137746	RNU6-8	14	32203163	32203269	-	107	snRNA	RNA, U6 small nuclear 8 [Source:HGNC Symbol;Acc:HGNC:34285]	-	169	59	91.1335	26.9253
ENSG00000164687	1.6351	3.1061	0.000108789	0.0140843	FABP5	8	81280363	81284777	+	2077	protein_coding	fatty acid binding protein 5 [Source:HGNC Symbol;Acc:HGNC:3560]	-	3831	1531	106.427	35.9941
ENSG00000204592	-1.65425	3.1476	0.00010899	0.0140843	HLA-E	6	30489467	30494205	+	2975	protein_coding	major histocompatibility complex, class I, E [Source:HGNC Symbol;Acc:HGNC:4962]	-	435	1700	8.43679	27.9033
ENSG00000196878	-4.12876	17.4936	0.000109596	0.0140843	LAMB3	1	209614870	209652466	-	4688	protein_coding	laminin subunit beta 3 [Source:HGNC Symbol;Acc:HGNC:6490]	-	1	24	0.012308	0.249986
ENSG00000272990	4.45481	21.9296	0.000109596	0.0140843	AC084036.1	3	156523740	156524247	-	508	antisense	novel transcript, antisense to KCNAB1	-	20	1	2.27165	0.0961234
ENSG00000261168	-4.12876	17.4936	0.000109596	0.0140843	AL592424.1	1	151130075	151131610	-	1536	sense_overlapping	novel transcript, sense overlapping SEMA6C	-	1	24	0.037565	0.76298
ENSG00000146039	-1.70561	3.26166	0.000109636	0.0140843	SLC17A4	6	25754699	25781191	+	4633	protein_coding	solute carrier family 17 member 4 [Source:HGNC Symbol;Acc:HGNC:10932]	-	157	636	1.95529	6.70329
ENSG00000181634	-1.82072	3.53259	0.00011465	0.0146475	TNFSF15	9	114784635	114806126	-	7889	protein_coding	TNF superfamily member 15 [Source:HGNC Symbol;Acc:HGNC:11931]	-	51	224	0.373012	1.3865
ENSG00000227827	-1.9948	3.98561	0.000116326	0.0147803	AC138969.1	16	16356224	16377507	+	9932	unprocessed_pseudogene	polycystic kidney disease 1 (autosomal dominant) (PKD1) pseudogene	-	27	134	0.156856	0.658811
ENSG00000139445	2.61313	6.11831	0.000118807	0.0149418	FOXN4	12	109277979	109309220	-	3471	protein_coding	forkhead box N4 [Source:HGNC Symbol;Acc:HGNC:21399]	Fork	40	8	0.664937	0.112546
ENSG00000253313	-2.04327	4.1218	0.000118882	0.0149418	C1orf210	1	43281883	43285617	-	1516	protein_coding	chromosome 1 open reading frame 210 [Source:HGNC Symbol;Acc:HGNC:28755]	-	22	113	0.837333	3.63975
ENSG00000099937	-1.6211	3.07609	0.000121248	0.0151544	SERPIND1	22	20773879	20787720	+	2553	protein_coding	serpin family D member 1 [Source:HGNC Symbol;Acc:HGNC:4838]	-	1920	7332	43.3936	140.238
ENSG00000179041	1.65424	3.14757	0.000121876	0.0151544	RRS1	8	66429028	66430733	+	1706	protein_coding	ribosome biogenesis regulator homolog [Source:HGNC Symbol;Acc:HGNC:17083]	-	875	345	29.594	9.87491
ENSG00000173193	-1.67221	3.18702	0.000123672	0.0152852	PARP14	3	122680618	122730840	+	10495	protein_coding	poly(ADP-ribose) polymerase family member 14 [Source:HGNC Symbol;Acc:HGNC:29232]	-	190	752	1.04459	3.49887
ENSG00000106624	-1.98191	3.95017	0.000124243	0.0152852	AEBP1	7	44104361	44114562	+	4955	protein_coding	AE binding protein 1 [Source:HGNC Symbol;Acc:HGNC:303]	-	25	123	0.291119	1.21214
ENSG00000134013	-1.65622	3.15191	0.000126875	0.0155268	LOXL2	8	23297189	23425328	-	5707	protein_coding	lysyl oxidase like 2 [Source:HGNC Symbol;Acc:HGNC:6666]	-	244	955	2.46693	8.17125
ENSG00000242299	1.71186	3.27582	0.000129132	0.0156161	AC073861.1	3	101576489	101576947	-	459	processed_pseudogene	ribosomal protein S18 (RPS18) pseudogene	-	309	117	38.8437	12.447
ENSG00000077264	-2.56217	5.90595	0.000129619	0.0156161	PAK3	X	110944285	111227361	+	10312	protein_coding	p21 (RAC1) activated kinase 3 [Source:HGNC Symbol;Acc:HGNC:8592]	-	7	52	0.0391679	0.246237
ENSG00000233589	2.55	5.85633	0.000129619	0.0156161	AL138789.1	1	68479129	68483539	+	960	antisense	novel transcript	-	43	9	2.58447	0.457788
ENSG00000127329	-1.69263	3.23246	0.000134351	0.0161028	PTPRB	12	70515866	70637440	-	14542	protein_coding	protein tyrosine phosphatase, receptor type B [Source:HGNC Symbol;Acc:HGNC:9665]	-	133	534	0.527719	1.79312
ENSG00000203690	-2.45307	5.47579	0.000138966	0.0164202	TCP10	6	167357031	167384510	-	7697	protein_coding	t-complex 10 [Source:HGNC Symbol;Acc:HGNC:11656]	-	8	55	0.0599713	0.348927
ENSG00000216365	2.4656	5.52358	0.000138966	0.0164202	RPL37P15	6	70098390	70098676	-	287	processed_pseudogene	ribosomal protein L37 pseudogene 15 [Source:HGNC Symbol;Acc:HGNC:36659]	-	45	10	9.04702	1.70142
ENSG00000110090	-1.6167	3.06674	0.000139118	0.0164202	CPT1A	11	68754620	68844410	-	6565	protein_coding	carnitine palmitoyltransferase 1A [Source:HGNC Symbol;Acc:HGNC:2328]	-	732	2787	6.43356	20.7298
ENSG00000234964	1.68148	3.20756	0.000141558	0.0166238	FABP5P7	11	59781318	59781722	-	405	processed_pseudogene	fatty acid binding protein 5 pseudogene 7 [Source:HGNC Symbol;Acc:HGNC:31070]	-	424	164	60.4068	19.7734
ENSG00000074181	-1.8407	3.58184	0.000144388	0.0168709	NOTCH3	19	15159038	15200981	-	9394	protein_coding	notch 3 [Source:HGNC Symbol;Acc:HGNC:7883]	-	44	196	0.270257	1.01882
ENSG00000008311	-1.6901	3.22679	0.000148647	0.0172816	AASS	7	122075647	122144280	-	4591	protein_coding	aminoadipate-semialdehyde synthase [Source:HGNC Symbol;Acc:HGNC:17366]	-	122	489	1.5333	5.20109
ENSG00000088992	1.67255	3.18777	0.000157522	0.0182224	TESC	12	117038923	117099479	-	1926	protein_coding	tescalcin [Source:HGNC Symbol;Acc:HGNC:26065]	-	388	151	11.6239	3.82837
ENSG00000065970	-1.67825	3.2004	0.000167111	0.0191609	FOXJ2	12	8032703	8055503	+	6296	protein_coding	forkhead box J2 [Source:HGNC Symbol;Acc:HGNC:24818]	Fork	122	485	1.11807	3.76158
ENSG00000273759	3.19243	9.14149	0.000167283	0.0191609	AL117379.1	20	62928621	62929297	-	677	lincRNA	novel transcript	-	23	3	1.96026	0.216384
ENSG00000092607	-1.78632	3.44934	0.00017799	0.0201904	TBX15	1	118883046	118989556	-	4349	protein_coding	T-box 15 [Source:HGNC Symbol;Acc:HGNC:11594]	T-box	52	223	0.689904	2.50385
ENSG00000042832	-1.83432	3.56602	0.000178007	0.0201904	TG	8	132866958	133134903	+	11132	protein_coding	thyroglobulin [Source:HGNC Symbol;Acc:HGNC:11764]	-	39	173	0.202147	0.758867
ENSG00000279759	2.26844	4.81802	0.000180546	0.0203789	AC118344.2	19	40355842	40360606	+	4765	TEC	TEC	-	47	12	0.569128	0.122973
ENSG00000285715	-3.18541	9.0971	0.000186219	0.0208293	AC063960.1	10	122017982	122019160	-	817	antisense	novel transcript, antisense to TACC2	-	3	35	0.211872	2.09189
ENSG00000163703	-1.59799	3.02722	0.000186328	0.0208293	CRELD1	3	9933822	9945413	+	3778	protein_coding	cysteine rich with EGF like domains 1 [Source:HGNC Symbol;Acc:HGNC:14630]	-	406	1526	6.20068	19.7236
ENSG00000106003	1.75727	3.38059	0.000189289	0.0210591	LFNG	7	2512529	2529177	+	3418	protein_coding	LFNG O-fucosylpeptide 3-beta-N-acetylglucosaminyltransferase [Source:HGNC Symbol;Acc:HGNC:6560]	-	180	66	3.03861	0.942898
ENSG00000145416	2.22135	4.66328	0.000192772	0.0211751	MARCH1	4	163524298	164384050	-	10421	protein_coding	membrane associated ring-CH-type finger 1 [Source:HGNC Symbol;Acc:HGNC:26077]	-	53	14	0.293455	0.0656012
ENSG00000078081	-1.93999	3.83704	0.000193104	0.0211751	LAMP3	3	183122213	183163839	-	3816	protein_coding	lysosomal associated membrane protein 3 [Source:HGNC Symbol;Acc:HGNC:14582]	-	27	129	0.408254	1.65072
ENSG00000145861	-7.03342	131	0.000193974	0.0211751	C1QTNF2	5	160347751	160370641	-	2414	protein_coding	C1q and TNF related 2 [Source:HGNC Symbol;Acc:HGNC:14325]	-	0	18	0	0.364106
ENSG00000278813	-6.95161	123.778	0.000193974	0.0211751	AC006133.1	19	39726030	39726775	-	264	unprocessed_pseudogene	Charcot-Leyden crystal galectin (CLC) pseudogene	-	0	17	0	3.1444
ENSG00000021852	-1.62896	3.09291	0.000197403	0.0214487	C8B	1	56929210	56966140	-	2729	protein_coding	complement C8 beta chain [Source:HGNC Symbol;Acc:HGNC:1353]	-	170	653	3.59435	11.6843
ENSG00000177410	1.5821	2.99406	0.000199408	0.0215658	ZFAS1	20	49278178	49295738	+	2243	antisense	ZNFX1 antisense RNA 1 [Source:HGNC Symbol;Acc:HGNC:33101]	-	1539	638	39.5899	13.8894
ENSG00000280623	-2.13863	4.40344	0.000206725	0.0221929	PCAT14	22	23536881	23547797	+	4911	lincRNA	prostate cancer associated transcript 14 [Source:HGNC Symbol;Acc:HGNC:48977]	-	14	77	0.164488	0.765621
ENSG00000145730	-1.56481	2.95839	0.000207116	0.0221929	PAM	5	102753981	103031105	+	8846	protein_coding	peptidylglycine alpha-amidating monooxygenase [Source:HGNC Symbol;Acc:HGNC:8596]	-	1329	4881	8.66868	26.9435
ENSG00000182774	1.61058	3.05375	0.000212031	0.0225692	RPS17	15	82536750	82540564	-	3293	protein_coding	ribosomal protein S17 [Source:HGNC Symbol;Acc:HGNC:10397]	-	598	243	10.4781	3.60336
ENSG00000197989	1.59216	3.015	0.000212715	0.0225692	SNHG12	1	28578538	28583132	-	4266	antisense	small nucleolar RNA host gene 12 [Source:HGNC Symbol;Acc:HGNC:30062]	-	843	347	11.402	3.97193
ENSG00000263006	-1.90991	3.75786	0.00021354	0.0225692	ROCK1P1	18	109065	122219	+	2645	transcribed_unprocessed_pseudogene	Rho associated coiled-coil containing protein kinase 1 pseudogene 1 [Source:HGNC Symbol;Acc:HGNC:37832]	-	28	131	0.610812	2.41846
ENSG00000214389	1.7763	3.42547	0.00022427	0.0235961	RPS3AP26	7	98385801	98386584	-	784	processed_pseudogene	ribosomal protein S3a pseudogene 26 [Source:HGNC Symbol;Acc:HGNC:36513]	-	141	51	10.3771	3.17649
ENSG00000179163	-1.70224	3.25406	0.000226635	0.0237375	FUCA1	1	23845077	23868294	-	2047	protein_coding	alpha-L-fucosidase 1 [Source:HGNC Symbol;Acc:HGNC:4006]	-	68	275	1.91675	6.56006
ENSG00000132109	-1.68193	3.20856	0.000229938	0.0239754	TRIM21	11	4384897	4393696	-	1929	protein_coding	tripartite motif containing 21 [Source:HGNC Symbol;Acc:HGNC:11312]	-	77	307	2.30321	7.7714
ENSG00000231999	-2.73136	6.64083	0.000231229	0.0240024	LRRC8C-DT	1	89583241	89632894	-	2088	antisense	LRRC8C divergent transcript [Source:HGNC Symbol;Acc:HGNC:53731]	-	5	42	0.13817	0.982227
ENSG00000108576	-1.69147	3.22985	0.000233044	0.0240833	SLC6A4	17	30194319	30236002	-	6983	protein_coding	solute carrier family 6 member 4 [Source:HGNC Symbol;Acc:HGNC:11050]	-	73	293	0.603192	2.04889
ENSG00000161642	-1.64251	3.12209	0.000235577	0.0242373	ZNF385A	12	54369133	54391298	-	3179	protein_coding	zinc finger protein 385A [Source:HGNC Symbol;Acc:HGNC:17521]	-	115	446	2.08729	6.85074
ENSG00000184481	-1.76694	3.40332	0.000238727	0.024399	FOXO4	X	71096197	71103535	+	3447	protein_coding	forkhead box O4 [Source:HGNC Symbol;Acc:HGNC:7139]	Fork	43	182	0.719784	2.57824
ENSG00000124215	3.12861	8.74595	0.000240916	0.024399	CDH26	20	59958427	60034011	+	5748	protein_coding	cadherin 26 [Source:HGNC Symbol;Acc:HGNC:15902]	-	22	3	0.220842	0.0254857
ENSG00000027869	3.6821	12.8358	0.000240916	0.024399	SH2D2A	1	156806243	156816862	-	2512	protein_coding	SH2 domain containing 2A [Source:HGNC Symbol;Acc:HGNC:10821]	-	22	2	0.505333	0.0388779
ENSG00000175768	1.87595	3.67044	0.000241346	0.024399	TOMM5	9	37582646	37592642	-	3644	protein_coding	translocase of outer mitochondrial membrane 5 [Source:HGNC Symbol;Acc:HGNC:31369]	-	89	30	1.40925	0.402009
ENSG00000160654	-2.0949	4.27196	0.000243475	0.0245077	CD3G	11	118344344	118355161	+	3836	protein_coding	CD3g molecule [Source:HGNC Symbol;Acc:HGNC:1675]	-	15	80	0.225625	1.01837
ENSG00000167600	2.50098	5.66072	0.000246499	0.0245991	CYP2S1	19	41193049	41207539	+	2874	protein_coding	cytochrome P450 family 2 subfamily S member 1 [Source:HGNC Symbol;Acc:HGNC:15654]	-	37	8	0.742831	0.135924
ENSG00000243811	-2.5728	5.94965	0.000246499	0.0245991	APOBEC3D	22	39021113	39033276	+	2528	protein_coding	apolipoprotein B mRNA editing enzyme catalytic subunit 3D [Source:HGNC Symbol;Acc:HGNC:17354]	-	6	45	0.136946	0.869217
ENSG00000285373	-4.00398	16.0442	0.000248027	0.0246458	LINC02478	2	160257718	160271880	-	614	lincRNA	long intergenic non-protein coding RNA 2478 [Source:HGNC Symbol;Acc:HGNC:53446]	-	1	22	0.0939737	1.74963
ENSG00000187837	1.56428	2.9573	0.000251755	0.0248439	HIST1H1C	6	26055787	26056428	-	642	protein_coding	histone cluster 1 H1 family member c [Source:HGNC Symbol;Acc:HGNC:4716]	-	1158	486	104.075	36.9653
ENSG00000005884	-3.14375	8.8382	0.000252157	0.0248439	ITGA3	17	50055968	50090481	+	9802	protein_coding	integrin subunit alpha 3 [Source:HGNC Symbol;Acc:HGNC:6139]	-	3	34	0.0176596	0.169378
ENSG00000157150	-1.78062	3.43574	0.000253922	0.0249122	TIMP4	3	12153051	12159351	-	1650	protein_coding	TIMP metallopeptidase inhibitor 4 [Source:HGNC Symbol;Acc:HGNC:11823]	-	44	188	1.53866	5.56374
ENSG00000187678	1.55726	2.94294	0.000255963	0.0250069	SPRY4	5	142310427	142326455	-	6565	protein_coding	sprouty RTK signaling antagonist 4 [Source:HGNC Symbol;Acc:HGNC:15533]	-	1361	574	11.9618	4.26943
ENSG00000163121	-1.78113	3.43695	0.000261735	0.0253879	NEURL3	2	96497643	96508109	-	2497	protein_coding	neuralized E3 ubiquitin protein ligase 3 [Source:HGNC Symbol;Acc:HGNC:25162]	-	40	171	0.924307	3.34403
ENSG00000137831	-1.54999	2.92815	0.000262294	0.0253879	UACA	15	70654554	70763593	-	11031	protein_coding	uveal autoantigen with coiled-coil domains and ankyrin repeats [Source:HGNC Symbol;Acc:HGNC:15947]	-	576	2094	3.01288	9.26946
ENSG00000079308	-1.57342	2.97609	0.000263138	0.0253879	TNS1	2	217799588	218033982	-	16281	protein_coding	tensin 1 [Source:HGNC Symbol;Acc:HGNC:11973]	-	266	983	0.942704	2.94826
ENSG00000182568	-1.60008	3.0316	0.0002647	0.025433	SATB1	3	18345387	18445588	-	13409	protein_coding	SATB homeobox 1 [Source:HGNC Symbol;Acc:HGNC:10541]	CUT	166	625	0.71431	2.27602
ENSG00000104419	-1.52968	2.88721	0.000267668	0.0255946	NDRG1	8	133237171	133302022	-	9823	protein_coding	N-myc downstream regulated 1 [Source:HGNC Symbol;Acc:HGNC:7679]	-	7010	25125	41.1764	124.898
ENSG00000113249	-1.53264	2.89315	0.000268583	0.0255946	HAVCR1	5	157029413	157059119	-	2151	protein_coding	hepatitis A virus cellular receptor 1 [Source:HGNC Symbol;Acc:HGNC:17866]	-	2172	7801	58.2632	177.094
ENSG00000197893	-1.92753	3.80403	0.000271192	0.0257378	NRAP	10	113588716	113664127	-	5724	protein_coding	nebulin related anchoring protein [Source:HGNC Symbol;Acc:HGNC:7988]	-	23	109	0.231848	0.929865
ENSG00000188175	1.97864	3.9412	0.000283294	0.0267771	HEPACAM2	7	93188586	93226524	-	2483	protein_coding	HEPACAM family member 2 [Source:HGNC Symbol;Acc:HGNC:27364]	-	67	21	1.55694	0.412986
ENSG00000270504	-2.14799	4.43209	0.000284711	0.026802	AL391422.4	6	3751111	3753871	+	2761	antisense	novel transcript, antisense to PXDC1	-	13	72	0.271676	1.27338
ENSG00000156966	-1.64523	3.12798	0.000292432	0.0273627	B3GNT7	2	231395543	231401164	+	3806	protein_coding	UDP-GlcNAc:betaGal beta-1,3-N-acetylglucosaminyltransferase 7 [Source:HGNC Symbol;Acc:HGNC:18811]	-	88	342	1.3341	4.38783
ENSG00000171858	1.51978	2.86748	0.00029387	0.0273627	RPS21	20	62387116	62388520	+	1023	protein_coding	ribosomal protein S21 [Source:HGNC Symbol;Acc:HGNC:10409]	-	12841	5559	724.266	265.347
ENSG00000049192	-1.70657	3.26384	0.000294198	0.0273627	ADAMTS6	5	65148736	65481920	-	8567	protein_coding	ADAM metallopeptidase with thrombospondin type 1 motif 6 [Source:HGNC Symbol;Acc:HGNC:222]	-	52	211	0.350227	1.20267
ENSG00000118420	1.7021	3.25375	0.000296443	0.0274618	UBE3D	6	82892398	83065841	-	6394	protein_coding	ubiquitin protein ligase E3D [Source:HGNC Symbol;Acc:HGNC:21381]	-	168	64	1.51604	0.488765
ENSG00000006016	2.91313	7.5325	0.000299755	0.0276399	CRLF1	19	18572220	18607741	-	3018	protein_coding	cytokine receptor like factor 1 [Source:HGNC Symbol;Acc:HGNC:2364]	-	25	4	0.477965	0.0647193
ENSG00000168811	2.56852	5.932	0.000300744	0.0276399	IL12A	3	159988750	159996019	+	2040	protein_coding	interleukin 12A [Source:HGNC Symbol;Acc:HGNC:5969]	-	34	7	0.961665	0.167556
ENSG00000259417	1.6019	3.03542	0.000306788	0.0280813	CTXND1	15	80195484	80252213	-	6890	protein_coding	cortexin domain containing 1 [Source:HGNC Symbol;Acc:HGNC:50507]	-	345	141	2.88918	0.999293
ENSG00000160593	-1.56149	2.95159	0.00031255	0.0280813	JAML	11	118193740	118225094	-	8587	protein_coding	junction adhesion molecule like [Source:HGNC Symbol;Acc:HGNC:19084]	-	230	843	1.54547	4.79379
ENSG00000119508	-6.86487	116.556	0.000315208	0.0280813	NR4A3	9	99821855	99866891	+	6314	protein_coding	nuclear receptor subfamily 4 group A member 3 [Source:HGNC Symbol;Acc:HGNC:7982]	NGFIB-like	0	16	0	0.123739
ENSG00000146285	-6.86487	116.556	0.000315208	0.0280813	SCML4	6	107704104	107824317	-	7116	protein_coding	Scm polycomb group protein like 4 [Source:HGNC Symbol;Acc:HGNC:21397]	-	0	16	0	0.109794
ENSG00000260325	6.98319	126.517	0.000315208	0.0280813	HSPB9	17	42121431	42123352	+	1922	protein_coding	heat shock protein family B (small) member 9 [Source:HGNC Symbol;Acc:HGNC:30589]	-	14	0	0.42029	0
ENSG00000271366	6.98319	126.517	0.000315208	0.0280813	AC002128.2	19	35251440	35253639	-	618	antisense	novel transcript	-	14	0	1.30712	0
ENSG00000058335	-6.86487	116.556	0.000315208	0.0280813	RASGRF1	15	78959947	79090773	-	9929	protein_coding	Ras protein specific guanine nucleotide releasing factor 1 [Source:HGNC Symbol;Acc:HGNC:9875]	-	0	16	0	0.0786878
ENSG00000236165	6.98319	126.517	0.000315208	0.0280813	PRADC1P1	3	36976316	36976840	+	525	processed_pseudogene	protease associated domain containing 1 pseudogene 1 [Source:HGNC Symbol;Acc:HGNC:44534]	-	14	0	1.53866	0
ENSG00000143595	-1.5372	2.90231	0.000322727	0.0286414	AQP10	1	154321090	154325325	+	2292	protein_coding	aquaporin 10 [Source:HGNC Symbol;Acc:HGNC:16029]	-	396	1427	9.96909	30.402
ENSG00000214491	-2.25894	4.7864	0.000336783	0.0297752	SEC14L6	22	30522799	30546682	-	3392	protein_coding	SEC14 like lipid binding 6 [Source:HGNC Symbol;Acc:HGNC:40047]	-	9	54	0.153095	0.777375
ENSG00000227036	1.56527	2.95933	0.000339983	0.0299443	LINC00511	17	72290091	72640472	-	27605	processed_transcript	long intergenic non-protein coding RNA 511 [Source:HGNC Symbol;Acc:HGNC:43564]	-	477	200	0.997024	0.353781
ENSG00000260077	-3.10086	8.57931	0.000342416	0.0300448	AC104794.2	2	10039092	10040663	-	1572	lincRNA	novel transcript	-	3	33	0.110114	1.02507
ENSG00000109610	-1.78175	3.43843	0.000345502	0.0302015	SOD3	4	24789912	24800842	+	2128	protein_coding	superoxide dismutase 3 [Source:HGNC Symbol;Acc:HGNC:11181]	-	36	154	0.976126	3.5338
ENSG00000161267	-1.90977	3.75748	0.000347222	0.0302382	BDH1	3	197509783	197573323	-	9114	protein_coding	3-hydroxybutyrate dehydrogenase 1 [Source:HGNC Symbol;Acc:HGNC:1027]	-	22	103	0.13928	0.55185
ENSG00000101361	1.49298	2.81469	0.000370403	0.0321366	NOP56	20	2652145	2658393	+	5398	protein_coding	NOP56 ribonucleoprotein [Source:HGNC Symbol;Acc:HGNC:15911]	-	15847	6989	169.391	63.223
ENSG00000129295	-3.9373	15.3195	0.000376589	0.0325123	LRRC6	8	132571953	132675617	-	2778	protein_coding	leucine rich repeat containing 6 [Source:HGNC Symbol;Acc:HGNC:16725]	-	1	21	0.0207703	0.36913
ENSG00000163346	-1.50394	2.83616	0.00037753	0.0325123	PBXIP1	1	154944076	154956123	-	3851	protein_coding	PBX homeobox interacting protein 1 [Source:HGNC Symbol;Acc:HGNC:21199]	-	783	2757	11.7318	34.9588
ENSG00000138172	1.93499	3.82375	0.000382303	0.0328019	CALHM2	10	103446786	103452402	-	3108	protein_coding	calcium homeostasis modulator family member 2 [Source:HGNC Symbol;Acc:HGNC:23493]	-	65	21	1.20672	0.329937
ENSG00000272153	2.52559	5.7581	0.000391938	0.0335049	AL365330.1	1	3785008	3785538	+	531	antisense	novel transcript, antisense to LRRC47	-	33	7	3.58587	0.643719
ENSG00000155846	1.58299	2.99591	0.000399661	0.03404	PPARGC1B	5	149730298	149855022	+	12889	protein_coding	PPARG coactivator 1 beta [Source:HGNC Symbol;Acc:HGNC:30022]	-	285	118	1.27585	0.44705
ENSG00000205517	-1.53242	2.89271	0.000403524	0.0342436	RGL3	19	11384341	11419342	-	4358	protein_coding	ral guanine nucleotide dissociation stimulator like 3 [Source:HGNC Symbol;Acc:HGNC:30282]	-	228	819	3.01872	9.17676
ENSG00000139269	-1.48594	2.801	0.000408044	0.0345013	INHBE	12	57452323	57459280	+	3015	protein_coding	inhibin subunit beta E [Source:HGNC Symbol;Acc:HGNC:24029]	-	1802	6266	34.486	101.484
ENSG00000143320	-2.26034	4.79105	0.000411285	0.0345562	CRABP2	1	156699606	156705816	-	1100	protein_coding	cellular retinoic acid binding protein 2 [Source:HGNC Symbol;Acc:HGNC:2339]	-	10	60	0.524544	2.66349
ENSG00000167779	-2.38579	5.22631	0.000411667	0.0345562	IGFBP6	12	53097436	53102345	+	1346	protein_coding	insulin like growth factor binding protein 6 [Source:HGNC Symbol;Acc:HGNC:5475]	-	7	46	0.300074	1.66881
ENSG00000132849	-3.42423	10.7349	0.000419448	0.0350828	PATJ	1	61742406	62178675	+	11990	protein_coding	PATJ, crumbs cell polarity complex component [Source:HGNC Symbol;Acc:HGNC:28881]	-	2	28	0.00962467	0.114033
ENSG00000168016	-1.66452	3.17009	0.00043626	0.0363581	TRANK1	3	36826820	36945098	-	12174	protein_coding	tetratricopeptide repeat and ankyrin repeat containing 1 [Source:HGNC Symbol;Acc:HGNC:29011]	-	51	201	0.24172	0.806224
ENSG00000152763	-1.77458	3.42139	0.000451794	0.0375183	WDR78	1	66812885	66924887	-	6704	protein_coding	WD repeat domain 78 [Source:HGNC Symbol;Acc:HGNC:26252]	-	31	132	0.26681	0.961463
ENSG00000181218	1.50932	2.84676	0.000458761	0.0379106	HIST3H2A	1	228456979	228457873	-	895	protein_coding	histone cluster 3 H2A [Source:HGNC Symbol;Acc:HGNC:20507]	-	679	296	43.7745	16.1496
ENSG00000245522	-1.91482	3.77066	0.000460932	0.0379106	AC026250.1	11	9754770	9759533	-	2632	lincRNA	uncharacterized LOC440028 [Source:NCBI gene;Acc:440028]	-	20	94	0.438449	1.74395
ENSG00000164251	-1.50681	2.8418	0.000464797	0.0379106	F2RL1	5	76818933	76835315	+	2958	protein_coding	F2R like trypsin receptor 1 [Source:HGNC Symbol;Acc:HGNC:3538]	-	261	921	5.09117	15.2039
ENSG00000244184	2.65722	6.30818	0.000466301	0.0379106	AC091153.3	17	4704230	4705529	+	472	antisense	uncharacterized LOC101559451 [Source:NCBI gene;Acc:101559451]	-	26	5	3.17838	0.517274
ENSG00000188626	-3.05666	8.32042	0.000466301	0.0379106	GOLGA8M	15	28701954	28738384	-	2202	protein_coding	golgin A8 family member M [Source:HGNC Symbol;Acc:HGNC:44404]	-	3	32	0.0786102	0.709619
ENSG00000215866	-3.05666	8.32042	0.000466301	0.0379106	LINC01356	1	112820170	112850643	-	1823	lincRNA	long intergenic non-protein coding RNA 1356 [Source:HGNC Symbol;Acc:HGNC:50587]	-	3	32	0.0949532	0.857149
ENSG00000214357	-1.59858	3.02845	0.000479594	0.0388555	NEURL1B	5	172641266	172691540	+	6424	protein_coding	neuralized E3 ubiquitin protein ligase 1B [Source:HGNC Symbol;Acc:HGNC:35422]	-	76	286	0.682626	2.17397
ENSG00000183971	1.50174	2.83183	0.000484222	0.0390942	NPW	16	2009926	2020755	+	1168	protein_coding	neuropeptide W [Source:HGNC Symbol;Acc:HGNC:30509]	-	753	330	37.1986	13.7963
ENSG00000174992	-1.47091	2.77196	0.000492302	0.0394029	ZG16	16	29778240	29782973	+	3132	protein_coding	zymogen granule protein 16 [Source:HGNC Symbol;Acc:HGNC:30961]	-	827	2846	15.2356	44.3717
ENSG00000185100	-2.78336	6.88452	0.000495363	0.0394029	ADSSL1	14	104724186	104747325	+	5775	protein_coding	adenylosuccinate synthase like 1 [Source:HGNC Symbol;Acc:HGNC:20093]	-	4	35	0.0399653	0.295944
ENSG00000273154	2.55759	5.88722	0.000495363	0.0394029	AL121845.3	20	63708864	63739103	+	3190	protein_coding	novel protein, ZGPAT-LIME1 readthrough	-	29	6	0.524544	0.0918446
ENSG00000136997	1.47115	2.77242	0.000510224	0.0394029	MYC	8	127735434	127741434	+	3001	protein_coding	MYC proto-oncogene, bHLH transcription factor [Source:HGNC Symbol;Acc:HGNC:7553]	bHLH	1635	732	31.436	11.9107
ENSG00000099399	1.52028	2.86847	0.000510256	0.0394029	MAGEB2	X	30215560	30220089	+	1610	protein_coding	MAGE family member B2 [Source:HGNC Symbol;Acc:HGNC:6809]	-	430	186	15.4105	5.64131
ENSG00000155926	-2.58747	6.01045	0.000511792	0.0394029	SLA	8	133036724	133103054	-	7637	protein_coding	Src like adaptor [Source:HGNC Symbol;Acc:HGNC:10902]	-	5	38	0.0377765	0.242971
ENSG00000231584	-2.20464	4.60958	0.000513333	0.0394029	FAHD2CP	2	96010551	96023380	+	2140	transcribed_unprocessed_pseudogene	fumarylacetoacetate hydrolase domain containing 2C, pseudogene [Source:HGNC Symbol;Acc:HGNC:44135]	-	9	52	0.242663	1.18654
ENSG00000198910	1.51823	2.86439	0.000515002	0.0394029	L1CAM	X	153861514	153886174	-	7270	protein_coding	L1 cell adhesion molecule [Source:HGNC Symbol;Acc:HGNC:6470]	-	464	201	3.68263	1.35006
ENSG00000185304	-6.77259	109.333	0.000517265	0.0394029	RGPD2	2	87755955	87825952	-	7023	protein_coding	RANBP2-like and GRIP domain containing 2 [Source:HGNC Symbol;Acc:HGNC:32415]	-	0	15	0	0.104295
ENSG00000280594	-6.77259	109.333	0.000517265	0.0394029	BTG3-AS1	21	17611744	17633199	+	2578	processed_transcript	BTG3 antisense RNA 1 [Source:HGNC Symbol;Acc:HGNC:53145]	-	0	15	0	0.28412
ENSG00000185837	6.87715	117.552	0.000517265	0.0394029	HDHD5-AS1	22	17159384	17165445	+	631	antisense	HDHD5 antisense RNA 1 [Source:HGNC Symbol;Acc:HGNC:1842]	-	13	0	1.18875	0
ENSG00000236364	6.87715	117.552	0.000517265	0.0394029	AL358115.1	1	165890795	165900683	-	1570	antisense	novel transcript, antisense to UCK2	-	13	0	0.47777	0
ENSG00000231414	6.87715	117.552	0.000517265	0.0394029	AC016700.2	2	70253855	70254010	-	156	processed_pseudogene	ribosomal protein L39 (RPL39) pseudogene	-	13	0	4.80832	0
ENSG00000231871	-6.77259	109.333	0.000517265	0.0394029	IPO9-AS1	1	201688259	201829559	-	1274	antisense	IPO9 antisense RNA 1 [Source:HGNC Symbol;Acc:HGNC:40892]	-	0	15	0	0.57493
ENSG00000272729	-6.77259	109.333	0.000517265	0.0394029	AC009336.1	2	176164164	176165716	-	1553	antisense	novel transcript, antisense to HOXD3	-	0	15	0	0.471642
ENSG00000235570	-6.77259	109.333	0.000517265	0.0394029	LINC00533	6	28648286	28649066	-	537	lincRNA	long intergenic non-protein coding RNA 533 [Source:HGNC Symbol;Acc:HGNC:18690]	-	0	15	0	1.36399
ENSG00000215244	-6.77259	109.333	0.000517265	0.0394029	AL137145.2	10	6277687	6335982	+	3086	lincRNA	uncharacterized LOC399715 [Source:NCBI gene;Acc:399715]	-	0	15	0	0.237349
ENSG00000089163	-2.28686	4.87993	0.000518548	0.0394029	SIRT4	12	120302316	120313249	+	1222	protein_coding	sirtuin 4 [Source:HGNC Symbol;Acc:HGNC:14932]	-	8	49	0.377741	1.95802
ENSG00000156711	-1.57439	2.9781	0.000523008	0.0396123	MAPK13	6	36127809	36144524	+	7197	protein_coding	mitogen-activated protein kinase 13 [Source:HGNC Symbol;Acc:HGNC:6875]	-	90	333	0.721549	2.25936
ENSG00000186204	1.4866	2.80228	0.000532499	0.0402002	CYP4F12	19	15672757	15697174	+	5351	protein_coding	cytochrome P450 family 4 subfamily F member 12 [Source:HGNC Symbol;Acc:HGNC:18857]	-	779	345	8.39996	3.14831
ENSG00000112769	-1.51662	2.8612	0.00054663	0.0411334	LAMA4	6	112108760	112254939	-	11575	protein_coding	laminin subunit alpha 4 [Source:HGNC Symbol;Acc:HGNC:6484]	-	159	565	0.792594	2.38353
ENSG00000107201	-1.53161	2.89108	0.000549284	0.0411998	DDX58	9	32455705	32526324	-	4353	protein_coding	DExD/H-box helicase 58 [Source:HGNC Symbol;Acc:HGNC:19102]	-	132	474	1.74969	5.31719
ENSG00000153233	-1.9378	3.83122	0.000552409	0.041301	PTPRR	12	70638073	70920843	-	5142	protein_coding	protein tyrosine phosphatase, receptor type R [Source:HGNC Symbol;Acc:HGNC:9680]	-	18	86	0.201983	0.816694
ENSG00000275022	2.03047	4.08537	0.000573157	0.0424746	MIR6753	11	68044794	68044957	+	164	miRNA	microRNA 6753 [Source:HGNC Symbol;Acc:HGNC:50255]	-	53	16	18.6469	4.76397
ENSG00000247934	-3.86738	14.5948	0.000575412	0.0424746	AC022364.1	12	28163298	28190738	-	2728	antisense	novel transcript, antisense to CCDC91	-	1	20	0.021151	0.357996
ENSG00000128346	-3.86738	14.5948	0.000575412	0.0424746	C22orf23	22	37943050	37953669	-	2299	protein_coding	chromosome 22 open reading frame 23 [Source:HGNC Symbol;Acc:HGNC:18589]	-	1	20	0.0250978	0.424799
ENSG00000135253	-3.86738	14.5948	0.000575412	0.0424746	KCP	7	128862451	128910719	-	8259	protein_coding	kielin/chordin-like protein [Source:HGNC Symbol;Acc:HGNC:17585]	-	1	20	0.0069863	0.118248
ENSG00000196656	1.53175	2.89136	0.000583261	0.0425324	AC004057.1	4	113214046	113217170	-	498	transcribed_processed_pseudogene	ribosomal protein S26 (RPS26) pseudogene	-	303	130	35.1066	12.747
ENSG00000138315	-1.4909	2.81064	0.000586543	0.0425324	OIT3	10	72893581	72933033	+	2365	protein_coding	oncoprotein induced transcript 3 [Source:HGNC Symbol;Acc:HGNC:29953]	-	206	719	5.02587	14.8454
ENSG00000260302	1.6925	3.23216	0.000587317	0.0425324	AP005482.1	18	12739490	12776137	-	2347	lincRNA	novel transcript	-	107	41	2.63054	0.853029
ENSG00000277075	2.03887	4.10923	0.000588514	0.0425324	HIST1H2AE	6	26216975	26217483	+	509	protein_coding	histone cluster 1 H2A family member e [Source:HGNC Symbol;Acc:HGNC:4724]	-	50	15	5.66796	1.43902
ENSG00000266651	2.03887	4.10923	0.000588514	0.0425324	AC093484.4	17	16440479	16440952	-	304	lincRNA	novel transcript	-	50	15	9.49011	2.40941
ENSG00000123572	-1.62582	3.08617	0.000588943	0.0425324	NRK	X	105822543	105958610	+	9573	protein_coding	Nik related kinase [Source:HGNC Symbol;Acc:HGNC:25391]	-	55	211	0.331505	1.07628
ENSG00000225976	2.79339	6.93258	0.000589	0.0425324	CKS1BP2	10	29697935	29698174	+	240	processed_pseudogene	CDC28 protein kinase regulatory subunit 1B pseudogene 2 [Source:HGNC Symbol;Acc:HGNC:24232]	-	23	4	5.52957	0.813845
ENSG00000235316	2.0484	4.13647	0.000604137	0.0433562	DUSP8P5	10	73731824	73733638	+	1815	processed_pseudogene	dual specificity phosphatase 8 pseudogene 5 [Source:HGNC Symbol;Acc:HGNC:45003]	-	47	14	1.49416	0.376655
ENSG00000226754	-2.18651	4.55204	0.000604137	0.0433562	AL606760.1	1	53238610	53242783	+	1181	antisense	uncharacterized LOC100507564 [Source:NCBI gene;Acc:100507564]	-	10	57	0.488568	2.35677
ENSG00000220842	1.479	2.78755	0.000620082	0.0443635	RPL21P16	10	120354701	120355183	-	483	processed_pseudogene	ribosomal protein L21 pseudogene 16 [Source:HGNC Symbol;Acc:HGNC:31396]	-	602	268	71.9158	27.0945
ENSG00000112306	1.43068	2.69573	0.000626411	0.0446789	RPS12	6	132814441	132817564	+	767	protein_coding	ribosomal protein S12 [Source:HGNC Symbol;Acc:HGNC:10385]	-	47084	21682	3542.04	1380.37
ENSG00000165091	-3.01105	8.06153	0.000636793	0.0452463	TMC1	9	72521608	72838230	+	7004	protein_coding	transmembrane channel like 1 [Source:HGNC Symbol;Acc:HGNC:16513]	-	3	31	0.0247144	0.216127
ENSG00000174469	-1.49607	2.82073	0.000638259	0.0452463	CNTNAP2	7	146116002	148420998	+	16666	protein_coding	contactin associated protein like 2 [Source:HGNC Symbol;Acc:HGNC:13830]	-	155	543	0.53663	1.59097
ENSG00000271936	1.96668	3.90866	0.000640504	0.0452675	AC012073.1	2	24825610	24826717	+	1108	antisense	novel transcript, antisense to ADCY3	-	57	18	2.96832	0.793278
ENSG00000130427	-1.45222	2.7363	0.000644522	0.0454134	EPO	7	100720800	100723700	+	1330	protein_coding	erythropoietin [Source:HGNC Symbol;Acc:HGNC:3415]	-	448	1522	19.4357	55.8799
ENSG00000100767	-1.76758	3.40482	0.000655716	0.0459392	PAPLN	14	73237497	73274640	+	7699	protein_coding	papilin, proteoglycan like sulfated glycoprotein [Source:HGNC Symbol;Acc:HGNC:19262]	-	25	106	0.187362	0.672302
ENSG00000124787	1.58259	2.99507	0.000660179	0.0459392	RPP40	6	4994732	5004063	-	1962	protein_coding	ribonuclease P/MRP subunit p40 [Source:HGNC Symbol;Acc:HGNC:20992]	-	186	77	5.47002	1.91639
ENSG00000164342	-2.32186	4.99976	0.000660415	0.0459392	TLR3	4	186069152	186088069	+	6724	protein_coding	toll like receptor 3 [Source:HGNC Symbol;Acc:HGNC:11849]	-	7	44	0.0600683	0.319535
ENSG00000279253	-2.7417	6.68859	0.000660977	0.0459392	AL121753.2	20	35262727	35264187	-	1461	TEC	novel transcript	-	4	34	0.157974	1.13637
ENSG00000168528	-1.43083	2.69603	0.000665121	0.0459392	SERINC2	1	31409565	31434680	+	3549	protein_coding	serine incorporator 2 [Source:HGNC Symbol;Acc:HGNC:23231]	-	1320	4418	21.4606	60.7873
ENSG00000069431	-2.43894	5.42241	0.000668181	0.0459392	ABCC9	12	21797401	21942529	-	11616	protein_coding	ATP binding cassette subfamily C member 9 [Source:HGNC Symbol;Acc:HGNC:60]	-	6	41	0.0298037	0.172354
ENSG00000162777	-2.43894	5.42241	0.000668181	0.0459392	DENND2D	1	111187174	111204535	-	5515	protein_coding	DENN domain containing 2D [Source:HGNC Symbol;Acc:HGNC:26192]	-	6	41	0.0627741	0.363021
ENSG00000107165	-2.54914	5.85285	0.0006696	0.0459392	TYRP1	9	12685439	12710290	+	3741	protein_coding	tyrosinase related protein 1 [Source:HGNC Symbol;Acc:HGNC:12450]	-	5	37	0.0771183	0.482955
ENSG00000143947	1.42316	2.68171	0.00067333	0.0459392	RPS27A	2	55231903	55235853	+	3130	protein_coding	ribosomal protein S27a [Source:HGNC Symbol;Acc:HGNC:10417]	-	16159	7480	297.883	116.694
ENSG00000142910	-1.43865	2.71068	0.000674551	0.0459392	TINAGL1	1	31576485	31587686	+	5281	protein_coding	tubulointerstitial nephritis antigen like 1 [Source:HGNC Symbol;Acc:HGNC:19168]	-	635	2137	6.93797	19.7597
ENSG00000169684	1.63137	3.09807	0.000675128	0.0459392	CHRNA5	15	78565520	78595269	+	3623	protein_coding	cholinergic receptor nicotinic alpha 5 subunit [Source:HGNC Symbol;Acc:HGNC:1959]	-	135	54	2.15001	0.72781
ENSG00000156096	-1.48553	2.80021	0.000676111	0.0459392	UGT2B4	4	69480165	69526014	-	2506	protein_coding	UDP glucuronosyltransferase family 2 member B4 [Source:HGNC Symbol;Acc:HGNC:12553]	-	157	546	3.61488	10.6391
ENSG00000165215	-1.61064	3.05388	0.000677669	0.0459392	CLDN3	7	73768997	73770270	-	1274	protein_coding	claudin 3 [Source:HGNC Symbol;Acc:HGNC:2045]	-	54	205	2.44568	7.85737
ENSG00000159199	1.42163	2.67888	0.000723382	0.0488956	ATP5MC1	17	48892765	48895871	+	2615	protein_coding	ATP synthase membrane subunit c locus 1 [Source:HGNC Symbol;Acc:HGNC:841]	-	2948	1366	65.0475	25.5077
ENSG00000172985	1.82954	3.55423	0.000727725	0.0489893	SH3RF3	2	109129348	109504632	+	5803	protein_coding	SH3 domain containing ring finger 3 [Source:HGNC Symbol;Acc:HGNC:24699]	-	69	24	0.686075	0.201954
ENSG00000111325	1.70949	3.27046	0.000729229	0.0489893	OGFOD2	12	122974580	122980043	+	4608	protein_coding	2-oxoglutarate and iron dependent oxygenase domain containing 2 [Source:HGNC Symbol;Acc:HGNC:25823]	-	103	39	1.28973	0.413281
ENSG00000178977	-2.16104	4.47238	0.000733197	0.0489893	LINC00324	17	8220642	8224043	-	2082	lincRNA	long intergenic non-protein coding RNA 324 [Source:HGNC Symbol;Acc:HGNC:26628]	-	10	56	0.277137	1.31341
ENSG00000150281	-2.16104	4.47238	0.000733197	0.0489893	CTF1	16	30896607	30903560	+	1664	protein_coding	cardiotrophin 1 [Source:HGNC Symbol;Acc:HGNC:2499]	-	10	56	0.346754	1.64334
ENSG00000239672	1.41913	2.67424	0.000743006	0.0494308	NME1	17	51153536	51162428	+	3438	protein_coding	NME/NM23 nucleoside diphosphate kinase 1 [Source:HGNC Symbol;Acc:HGNC:7849]	-	2721	1263	45.6665	17.9387
ENSG00000138670	-1.76186	3.39135	0.000744056	0.0494308	RASGEF1B	4	81426393	82044244	-	10183	protein_coding	RasGEF domain family member 1B [Source:HGNC Symbol;Acc:HGNC:24881]	-	27	114	0.15299	0.546666
ENSG00000006756	-1.47503	2.7799	0.000754357	0.0499724	ARSD	X	2903970	2929351	-	7030	protein_coding	arylsulfatase D [Source:HGNC Symbol;Acc:HGNC:717]	-	168	580	1.37889	4.02871
ENSG00000204316	1.58692	3.00407	0.000766433	0.0506282	MRPL38	17	75898643	75905413	-	3663	protein_coding	mitochondrial ribosomal protein L38 [Source:HGNC Symbol;Acc:HGNC:14033]	-	143	59	2.25255	0.786517
ENSG00000069667	-1.62841	3.09173	0.000784774	0.0516262	RORA	15	60488284	61229319	-	17040	protein_coding	RAR related orphan receptor A [Source:HGNC Symbol;Acc:HGNC:10258]	THR-like	45	173	0.152376	0.495758
ENSG00000115339	2.19594	4.58188	0.000785983	0.0516262	GALNT3	2	165747591	165794682	-	4686	protein_coding	polypeptide N-acetylgalactosaminyltransferase 3 [Source:HGNC Symbol;Acc:HGNC:4125]	-	41	11	0.504843	0.114626
ENSG00000180739	-2.19598	4.582	0.000812684	0.0531823	S1PR5	19	10512742	10517931	-	2806	protein_coding	sphingosine-1-phosphate receptor 5 [Source:HGNC Symbol;Acc:HGNC:14299]	-	8	46	0.164504	0.800503
ENSG00000132669	-1.42887	2.69237	0.000814248	0.0531823	RIN2	20	19757606	20002459	+	8273	protein_coding	Ras and Rab interactor 2 [Source:HGNC Symbol;Acc:HGNC:18750]	-	385	1287	2.68518	7.59641
ENSG00000167772	-1.74917	3.36164	0.000826852	0.053459	ANGPTL4	19	8363289	8374373	+	2482	protein_coding	angiopoietin like 4 [Source:HGNC Symbol;Acc:HGNC:16039]	-	27	113	0.627678	2.22315
ENSG00000228302	2.72958	6.63262	0.000829981	0.053459	AL512770.1	10	12244751	12247845	-	2510	antisense	novel transcript	-	22	4	0.505736	0.0778178
ENSG00000145103	-3.31786	9.97186	0.000829981	0.053459	ILDR1	3	121987323	122022258	-	3006	protein_coding	immunoglobulin like domain containing receptor 1 [Source:HGNC Symbol;Acc:HGNC:28741]	-	2	26	0.0383898	0.422355
ENSG00000260192	-3.31786	9.97186	0.000829981	0.053459	LINC02240	5	124808981	125602227	+	7412	lincRNA	long intergenic non-protein coding RNA 2240 [Source:HGNC Symbol;Acc:HGNC:53118]	-	2	26	0.0155693	0.17129
ENSG00000140284	-1.52121	2.87031	0.000841073	0.053459	SLC27A2	15	50182196	50236395	+	2802	protein_coding	solute carrier family 27 member 2 [Source:HGNC Symbol;Acc:HGNC:10996]	-	83	296	1.70917	5.15842
ENSG00000104324	-1.43908	2.71148	0.00084615	0.053459	CPQ	8	96645227	97149654	+	3457	protein_coding	carboxypeptidase Q [Source:HGNC Symbol;Acc:HGNC:16910]	-	248	835	4.1393	11.7945
ENSG00000181524	1.42293	2.6813	0.000854176	0.053459	RPL24P4	6	42956345	42956765	-	421	processed_pseudogene	ribosomal protein L24 pseudogene 4 [Source:HGNC Symbol;Acc:HGNC:21371]	-	916	424	125.542	49.1787
ENSG00000125510	-6.674	102.111	0.00085757	0.053459	OPRL1	20	64080173	64100643	+	3549	protein_coding	opioid related nociceptin receptor 1 [Source:HGNC Symbol;Acc:HGNC:8155]	-	0	14	0	0.192626
ENSG00000258701	-6.674	102.111	0.00085757	0.053459	LINC00638	14	104821201	104823718	+	2518	lincRNA	long intergenic non-protein coding RNA 638 [Source:HGNC Symbol;Acc:HGNC:28325]	-	0	14	0	0.271497
ENSG00000257303	6.7627	108.586	0.00085757	0.053459	AC073896.2	12	56300142	56314808	+	576	antisense	novel transcript, antisense to CNPY2 and CS	-	12	0	1.20208	0
ENSG00000228434	6.7627	108.586	0.00085757	0.053459	AC004951.1	7	44004046	44007866	-	1866	lincRNA	novel transcript	-	12	0	0.37106	0
ENSG00000208772	6.7627	108.586	0.00085757	0.053459	SNORD94	2	86135870	86136006	+	137	snoRNA	small nucleolar RNA, C/D box 94 [Source:HGNC Symbol;Acc:HGNC:32756]	-	12	0	5.054	0
ENSG00000249655	6.7627	108.586	0.00085757	0.053459	AC008434.1	5	80630313	80631590	-	549	antisense	novel transcript	-	12	0	1.2612	0
ENSG00000271754	6.7627	108.586	0.00085757	0.053459	AL355802.2	6	43519180	43519724	-	545	antisense	novel transcript, antisense to POLR1C	-	12	0	1.27046	0
ENSG00000111886	6.7627	108.586	0.00085757	0.053459	GABRR2	6	89257208	89315299	-	2230	protein_coding	gamma-aminobutyric acid type A receptor rho2 subunit [Source:HGNC Symbol;Acc:HGNC:4091]	-	12	0	0.310493	0
ENSG00000280409	-6.674	102.111	0.00085757	0.053459	LINC01101	2	120464335	120466218	-	1884	TEC	long intergenic non-protein coding RNA 1101 [Source:HGNC Symbol;Acc:HGNC:25923]	-	0	14	0	0.362861
ENSG00000236412	6.7627	108.586	0.00085757	0.053459	AC092941.2	3	188001700	188003406	-	1008	lincRNA	novel transcript	-	12	0	0.686903	0
ENSG00000280213	1.80457	3.49324	0.000871067	0.0535801	UCKL1-AS1	20	63953384	63956985	+	3602	antisense	UCKL1 antisense RNA 1 [Source:HGNC Symbol;Acc:HGNC:31967]	-	65	23	1.04122	0.311801
ENSG00000235558	-2.96396	7.80263	0.000872039	0.0535801	GUSBP9	5	71220356	71259238	-	423	unprocessed_pseudogene	glucuronidase, beta pseudogene 9 [Source:NCBI gene;Acc:100049076]	-	3	30	0.409219	3.46317
ENSG00000111424	1.63699	3.11015	0.000873412	0.0535801	VDR	12	47841537	47943048	-	5674	protein_coding	vitamin D receptor [Source:HGNC Symbol;Acc:HGNC:12679]	THR-like	123	49	1.25081	0.421696
ENSG00000036473	1.63094	3.09714	0.000877437	0.0535801	OTC	X	38352545	38421450	+	1728	protein_coding	ornithine carbamoyltransferase [Source:HGNC Symbol;Acc:HGNC:8512]	-	115	46	3.83998	1.29989
ENSG00000278903	-2.50976	5.69526	0.000877744	0.0535801	CU633906.2	21	6318434	6360415	+	3405	lincRNA	uncharacterized LOC102724843 [Source:NCBI gene;Acc:102724843]	-	5	36	0.0847282	0.516272
ENSG00000241884	-2.50976	5.69526	0.000877744	0.0535801	AC114401.1	3	67296300	67306359	+	2110	lincRNA	novel transcript	-	5	36	0.13673	0.83313
ENSG00000273058	2.4549	5.48276	0.000883969	0.0535801	AL359921.2	1	236536162	236536704	-	543	antisense	novel transcript	-	27	6	2.86905	0.539566
ENSG00000273366	-3.7939	13.87	0.000884859	0.0535801	Z83851.2	22	42278188	42278846	+	659	lincRNA	novel transcript	-	1	19	0.0875567	1.40787
ENSG00000221818	-3.7939	13.87	0.000884859	0.0535801	EBF2	8	25841730	26045397	-	7077	protein_coding	early B cell factor 2 [Source:HGNC Symbol;Acc:HGNC:19090]	COE	1	19	0.00815316	0.131098
ENSG00000103740	4.13488	17.568	0.000884859	0.0535801	ACSBG1	15	78167468	78245688	-	8230	protein_coding	acyl-CoA synthetase bubblegum family member 1 [Source:HGNC Symbol;Acc:HGNC:29567]	-	16	1	0.112175	0.00593326
ENSG00000251273	-3.7939	13.87	0.000884859	0.0535801	LINC02228	5	25087450	25190956	-	3875	lincRNA	long intergenic non-protein coding RNA 2228 [Source:HGNC Symbol;Acc:HGNC:53097]	-	1	19	0.0148903	0.239428
ENSG00000166147	-1.41031	2.65794	0.00089327	0.0539489	FBN1	15	48408306	48645849	-	16057	protein_coding	fibrillin 1 [Source:HGNC Symbol;Acc:HGNC:3603]	-	470	1551	1.68892	4.71672
ENSG00000133597	-1.50821	2.84457	0.000906002	0.054576	ADCK2	7	140673153	140696261	+	2913	protein_coding	aarF domain containing kinase 2 [Source:HGNC Symbol;Acc:HGNC:19039]	-	88	311	1.74308	5.2133
ENSG00000156587	-1.4337	2.70138	0.000910211	0.0546879	UBE2L6	11	57551656	57568284	-	2197	protein_coding	ubiquitin conjugating enzyme E2 L6 [Source:HGNC Symbol;Acc:HGNC:12490]	-	237	795	6.22434	17.6697
ENSG00000162998	1.7917	3.46223	0.00091912	0.0550808	FRZB	2	182833275	182867162	-	3162	protein_coding	frizzled related protein [Source:HGNC Symbol;Acc:HGNC:3959]	-	70	25	1.27735	0.386074
ENSG00000184005	2.02622	4.07337	0.000931128	0.0556571	ST6GALNAC3	1	76074719	76634601	+	7237	protein_coding	ST6 N-acetylgalactosaminide alpha-2,6-sialyltransferase 3 [Source:HGNC Symbol;Acc:HGNC:19343]	-	43	13	0.342835	0.0877158
ENSG00000205710	1.81972	3.53012	0.000951973	0.0567571	C17orf107	17	4899418	4902932	+	3408	protein_coding	chromosome 17 open reading frame 107 [Source:HGNC Symbol;Acc:HGNC:37238]	-	60	21	1.01584	0.300893
ENSG00000105048	-1.65463	3.14843	0.000955912	0.0568462	TNNT1	19	55132794	55149354	-	2171	protein_coding	troponin T1, slow skeletal type [Source:HGNC Symbol;Acc:HGNC:11948]	-	36	141	0.956792	3.17141
ENSG00000212123	1.53531	2.89851	0.000975938	0.0576881	PRR22	19	5782960	5784765	-	1806	protein_coding	proline rich 22 [Source:HGNC Symbol;Acc:HGNC:28354]	-	180	77	5.75082	2.08193
ENSG00000147003	-2.02375	4.0664	0.000977512	0.0576881	CLTRN	X	15627318	15675012	-	2009	protein_coding	collectrin, amino acid transport regulator [Source:HGNC Symbol;Acc:HGNC:29437]	-	12	61	0.344648	1.48266
ENSG00000186790	-2.02375	4.0664	0.000977512	0.0576881	FOXE3	1	47416072	47418052	+	1981	protein_coding	forkhead box E3 [Source:HGNC Symbol;Acc:HGNC:3808]	Fork	12	61	0.34952	1.50362
ENSG00000175155	-1.42584	2.68671	0.000982159	0.0578156	YPEL2	17	59331689	59401729	+	8667	protein_coding	yippee like 2 [Source:HGNC Symbol;Acc:HGNC:18326]	-	229	764	1.52455	4.30445
ENSG00000265763	-1.90261	3.73889	0.000998515	0.0584823	ZNF488	10	47365496	47384273	-	3496	protein_coding	zinc finger protein 488 [Source:HGNC Symbol;Acc:HGNC:23535]	zf-C2H2	15	70	0.247568	0.977731
ENSG00000174015	-1.90261	3.73889	0.000998515	0.0584823	SPERT	13	45702311	45714559	+	2125	protein_coding	spermatid associated [Source:HGNC Symbol;Acc:HGNC:30720]	-	15	70	0.407293	1.60854
ENSG00000065534	-1.38394	2.6098	0.00101135	0.0590852	MYLK	3	123610049	123884331	-	22167	protein_coding	myosin light chain kinase [Source:HGNC Symbol;Acc:HGNC:7590]	-	900	2916	2.34267	6.42353
ENSG00000107819	-1.39077	2.62218	0.00105111	0.0611538	SFXN3	10	101031234	101041244	+	4631	protein_coding	sideroflexin 3 [Source:HGNC Symbol;Acc:HGNC:16087]	-	493	1605	6.14253	16.9236
ENSG00000124253	-1.4869	2.80286	0.00105202	0.0611538	PCK1	20	57561080	57568112	+	6819	protein_coding	phosphoenolpyruvate carboxykinase 1 [Source:HGNC Symbol;Acc:HGNC:8724]	-	85	296	0.719239	2.11965
ENSG00000064042	-1.40523	2.64861	0.0010586	0.0612108	LIMCH1	4	41359607	41700044	+	10862	protein_coding	LIM and calponin homology domains 1 [Source:HGNC Symbol;Acc:HGNC:29191]	-	284	934	1.50863	4.19885
ENSG00000184343	2.25387	4.7696	0.0010655	0.0612108	SRPK3	X	153776412	153785732	+	4744	protein_coding	SRSF protein kinase 3 [Source:HGNC Symbol;Acc:HGNC:11402]	-	35	9	0.425695	0.0926383
ENSG00000173898	1.37783	2.59876	0.00106575	0.0612108	SPTBN2	11	66685248	66729226	-	9642	protein_coding	spectrin beta, non-erythrocytic 2 [Source:HGNC Symbol;Acc:HGNC:11276]	-	2102	1004	12.5788	5.08463
ENSG00000123545	1.39688	2.63332	0.00107402	0.0612108	NDUFAF4	6	96889313	96897881	-	2540	protein_coding	NADH:ubiquinone oxidoreductase complex assembly factor 4 [Source:HGNC Symbol;Acc:HGNC:21034]	-	889	419	20.195	8.05514
ENSG00000061656	-1.41747	2.67118	0.00107711	0.0612108	SPAG4	20	35615892	35621049	+	2240	protein_coding	sperm associated antigen 4 [Source:HGNC Symbol;Acc:HGNC:11214]	-	205	680	5.28057	14.8236
ENSG00000177679	-3.07824	8.44586	0.00108459	0.0612108	SRRM3	7	76201900	76287288	+	6873	protein_coding	serine/arginine repetitive matrix 3 [Source:HGNC Symbol;Acc:HGNC:26729]	-	2	22	0.0167903	0.156304
ENSG00000172346	-3.07824	8.44586	0.00108459	0.0612108	CSDC2	22	41560763	41577741	+	3250	protein_coding	cold shock domain containing C2 [Source:HGNC Symbol;Acc:HGNC:30359]	CSD	2	22	0.0355076	0.330546
ENSG00000228350	-3.07824	8.44586	0.00108459	0.0612108	LINC02585	3	48663776	48669174	+	196	antisense	long intergenic non-protein coding RNA 2585 [Source:HGNC Symbol;Acc:HGNC:50302]	-	2	22	0.588774	5.481
ENSG00000166682	2.84072	7.1638	0.00108459	0.0612108	TMPRSS5	11	113687546	113706373	-	2666	protein_coding	transmembrane serine protease 5 [Source:HGNC Symbol;Acc:HGNC:14908]	-	18	3	0.389572	0.0549483
ENSG00000271032	3.39421	10.5138	0.00108459	0.0612108	AC020907.4	19	35014961	35025335	-	526	antisense	novel transcript	-	18	2	1.97452	0.185668
ENSG00000254812	3.39421	10.5138	0.00108459	0.0612108	AC067930.3	8	143632071	143633756	-	701	antisense	novel transcript	-	18	2	1.48159	0.139317
ENSG00000198336	2.84072	7.1638	0.00108459	0.0612108	MYL4	17	47200446	47223679	+	1636	protein_coding	myosin light chain 4 [Source:HGNC Symbol;Acc:HGNC:7585]	-	18	3	0.63484	0.0895428
ENSG00000161958	-2.36703	5.1588	0.00111107	0.0625533	FGF11	17	7438273	7444937	+	5565	protein_coding	fibroblast growth factor 11 [Source:HGNC Symbol;Acc:HGNC:3667]	-	6	39	0.0622101	0.34221
ENSG00000198888	1.36004	2.56692	0.00112444	0.0631535	MT-ND1	MT	3307	4262	+	956	protein_coding	mitochondrially encoded NADH:ubiquinone oxidoreductase core subunit 1 [Source:HGNC Symbol;Acc:HGNC:7455]	-	74478	36018	4495.16	1839.73
ENSG00000100003	-1.72947	3.31606	0.00112746	0.0631703	SEC14L2	22	30396857	30425317	+	5985	protein_coding	SEC14 like lipid binding 2 [Source:HGNC Symbol;Acc:HGNC:10699]	-	23	95	0.221737	0.77509
ENSG00000131469	1.36021	2.56722	0.0011343	0.063328	RPL27	17	42998273	43002959	+	2026	protein_coding	ribosomal protein L27 [Source:HGNC Symbol;Acc:HGNC:10328]	-	15405	7449	438.73	179.536
ENSG00000106327	-1.36502	2.5758	0.00113572	0.063328	TFR2	7	100620416	100642779	-	5065	protein_coding	transferrin receptor 2 [Source:HGNC Symbol;Acc:HGNC:11762]	-	1553	4966	17.6916	47.8763
ENSG00000166341	-1.40177	2.64226	0.00114276	0.0634344	DCHS1	11	6621323	6655854	-	10765	protein_coding	dachsous cadherin-related 1 [Source:HGNC Symbol;Acc:HGNC:13681]	-	242	794	1.29711	3.60163
ENSG00000130821	-1.3596	2.56614	0.00114309	0.0634344	SLC6A8	X	153688099	153696593	+	5498	protein_coding	solute carrier family 6 member 8 [Source:HGNC Symbol;Acc:HGNC:11055]	-	5334	16992	55.9787	150.915
ENSG00000107731	-1.38889	2.61878	0.0011579	0.0640549	UNC5B	10	71212570	71302864	+	6841	protein_coding	unc-5 netrin receptor B [Source:HGNC Symbol;Acc:HGNC:12568]	-	306	995	2.58093	7.10226
ENSG00000078804	-1.3724	2.589	0.00115978	0.0640549	TP53INP2	20	34704290	34713439	+	4228	protein_coding	tumor protein p53 inducible nuclear protein 2 [Source:HGNC Symbol;Acc:HGNC:16104]	-	630	2025	8.59766	23.3875
ENSG00000267519	1.86377	3.63957	0.00117135	0.0643881	AC020916.1	19	13823880	13842928	-	19049	antisense	novel transcript	-	56	19	0.169625	0.0487051
ENSG00000265806	1.86377	3.63957	0.00117135	0.0643881	MIR4292	9	136830957	136831023	+	67	miRNA	microRNA 4292 [Source:HGNC Symbol;Acc:HGNC:38348]	-	56	19	48.2268	13.8475
ENSG00000120049	-1.74706	3.35674	0.00118141	0.0645192	KCNIP2	10	101825974	101843920	-	3397	protein_coding	potassium voltage-gated channel interacting protein 2 [Source:HGNC Symbol;Acc:HGNC:15522]	-	22	92	0.373682	1.32247
ENSG00000225972	1.36082	2.56832	0.00118432	0.0645192	MTND1P23	1	629062	629433	+	372	unprocessed_pseudogene	MT-ND1 pseudogene 23 [Source:HGNC Symbol;Acc:HGNC:42092]	-	3207	1550	497.429	203.461
ENSG00000121753	-2.65461	6.29674	0.00118483	0.0645192	ADGRB2	1	31727117	31764893	-	7756	protein_coding	adhesion G protein-coupled receptor B2 [Source:HGNC Symbol;Acc:HGNC:944]	-	4	32	0.0297575	0.201468
ENSG00000167851	-2.65461	6.29674	0.00118483	0.0645192	CD300A	17	74466399	74484796	+	2703	protein_coding	CD300a molecule [Source:HGNC Symbol;Acc:HGNC:19319]	-	4	32	0.0853864	0.578092
ENSG00000119705	1.36918	2.58323	0.00118784	0.0645317	SLIRP	14	77708071	77761104	+	2631	protein_coding	SRA stem-loop interacting RNA binding protein [Source:HGNC Symbol;Acc:HGNC:20495]	-	1744	838	38.2473	15.5531
ENSG00000267002	1.38221	2.60667	0.00119377	0.0646015	AC060780.1	17	43148368	43171037	-	8450	lincRNA	novel transcript	-	922	439	6.29577	2.53688
ENSG00000155016	-2.91528	7.54374	0.00119746	0.0646015	CYP2U1	4	107931369	107953457	+	6096	protein_coding	cytochrome P450 family 2 subfamily U member 1 [Source:HGNC Symbol;Acc:HGNC:20582]	-	3	29	0.0283956	0.232298
ENSG00000267666	-2.91528	7.54374	0.00119746	0.0646015	AC004156.1	19	663482	669500	+	3319	lincRNA	novel transcript	-	3	29	0.0521542	0.426662
ENSG00000121075	-1.59956	3.03052	0.00120871	0.0650574	TBX4	17	61452404	61485110	+	3996	protein_coding	T-box 4 [Source:HGNC Symbol;Acc:HGNC:11603]	T-box	39	147	0.563137	1.79632
ENSG00000213741	1.35625	2.56019	0.0012163	0.0651575	RPS29	14	49570984	49599164	-	9845	protein_coding	ribosomal protein S29 [Source:HGNC Symbol;Acc:HGNC:10419]	-	3863	1873	22.6404	9.28998
ENSG00000134419	1.35455	2.55718	0.0012175	0.0651575	RPS15A	16	18781295	18790383	-	6679	protein_coding	ribosomal protein S15a [Source:HGNC Symbol;Acc:HGNC:10389]	-	5183	2516	44.7759	18.3947
ENSG00000166145	-1.43448	2.70286	0.00121897	0.0651575	SPINT1	15	40844018	40858207	+	3542	protein_coding	serine peptidase inhibitor, Kunitz type 1 [Source:HGNC Symbol;Acc:HGNC:11246]	-	126	423	2.05256	5.83156
ENSG00000139209	-1.36458	2.57501	0.00122206	0.0651728	SLC38A4	12	46764761	46832408	-	4145	protein_coding	solute carrier family 38 member 4 [Source:HGNC Symbol;Acc:HGNC:14679]	-	762	2436	10.6073	28.6976
ENSG00000176170	1.35914	2.56533	0.00122812	0.0653462	SPHK1	17	76376584	76387860	+	4416	protein_coding	sphingosine kinase 1 [Source:HGNC Symbol;Acc:HGNC:11240]	-	2325	1125	30.3787	12.4399
ENSG00000209082	1.43577	2.70526	0.00123375	0.0654959	MT-TL1	MT	3230	3304	+	75	Mt_tRNA	mitochondrially encoded tRNA leucine 1 (UUA/G) [Source:HGNC Symbol;Acc:HGNC:7490]	-	314	144	241.57	93.7549
ENSG00000172159	1.4305	2.69541	0.00124413	0.0658961	FRMD3	9	83242990	83538546	-	6486	protein_coding	FERM domain containing 3 [Source:HGNC Symbol;Acc:HGNC:24125]	-	302	139	2.68661	1.04648
ENSG00000113356	1.408	2.6537	0.0012498	0.0660464	POLR3G	5	90471748	90514553	+	4019	protein_coding	RNA polymerase III subunit G [Source:HGNC Symbol;Acc:HGNC:30075]	-	432	202	6.20213	2.45429
ENSG00000132744	-1.41701	2.67032	0.0012779	0.0673779	ACY3	11	67642555	67650659	-	1300	protein_coding	aminoacylase 3 [Source:HGNC Symbol;Acc:HGNC:24104]	-	139	461	6.16945	17.3161
ENSG00000187045	-1.39641	2.63246	0.00128116	0.067397	TMPRSS6	22	37065436	37109713	-	4232	protein_coding	transmembrane serine protease 6 [Source:HGNC Symbol;Acc:HGNC:16517]	-	197	644	2.68593	7.43076
ENSG00000204650	-1.65918	3.15836	0.00128499	0.067446	LINC02210	17	45620328	45655156	+	15578	transcribed_unitary_pseudogene	long intergenic non-protein coding RNA 2210 [Source:HGNC Symbol;Acc:HGNC:26327]	-	29	114	0.107414	0.357344
ENSG00000089127	-1.42765	2.69008	0.00129401	0.0675789	OAS1	12	112906777	112933222	+	4947	protein_coding	2'-5'-oligoadenylate synthetase 1 [Source:HGNC Symbol;Acc:HGNC:8086]	-	126	421	1.46961	4.15559
ENSG00000186470	-1.47981	2.78912	0.00129886	0.0675789	BTN3A2	6	26365159	26378320	+	7042	protein_coding	butyrophilin subfamily 3 member A2 [Source:HGNC Symbol;Acc:HGNC:1139]	-	73	253	0.598139	1.75435
ENSG00000179431	1.64755	3.13301	0.00129915	0.0675789	FJX1	11	35618419	35620868	+	2450	protein_coding	four jointed box 1 [Source:HGNC Symbol;Acc:HGNC:17166]	-	81	32	1.90763	0.637789
ENSG00000231574	1.64755	3.13301	0.00129915	0.0675789	LINC02015	3	177816865	177899224	+	3005	lincRNA	long intergenic non-protein coding RNA 2015 [Source:HGNC Symbol;Acc:HGNC:52850]	-	81	32	1.5553	0.519994
ENSG00000159247	-1.46108	2.75314	0.00131059	0.0680222	TUBBP5	9	138150075	138177433	+	2814	transcribed_unprocessed_pseudogene	tubulin beta pseudogene 5 [Source:HGNC Symbol;Acc:HGNC:23674]	-	88	301	1.8044	5.22318
ENSG00000106031	-1.60617	3.04443	0.00132032	0.0683643	HOXA13	7	27193503	27200106	-	5086	protein_coding	homeobox A13 [Source:HGNC Symbol;Acc:HGNC:5102]	Homeobox	33	125	0.37438	1.20013
ENSG00000188211	1.40709	2.65202	0.00132307	0.0683643	NCR3LG1	11	17351726	17377341	+	6438	protein_coding	natural killer cell cytotoxicity receptor 3 ligand 1 [Source:HGNC Symbol;Acc:HGNC:42400]	-	389	182	3.48637	1.38043
ENSG00000258867	1.47452	2.77892	0.0013441	0.0692969	LINC01146	14	88024550	88097619	+	2807	lincRNA	long intergenic non-protein coding RNA 1146 [Source:HGNC Symbol;Acc:HGNC:49467]	-	186	83	3.82336	1.44387
ENSG00000189045	-2.22031	4.65993	0.00135615	0.0697636	ANKDD1B	5	75611459	75671846	+	3287	protein_coding	ankyrin repeat and death domain containing 1B [Source:HGNC Symbol;Acc:HGNC:32525]	-	7	41	0.122878	0.609084
ENSG00000198513	-3.63466	12.4206	0.00136958	0.0698831	ATL1	14	50532509	50633068	+	4360	protein_coding	atlastin GTPase 1 [Source:HGNC Symbol;Acc:HGNC:11231]	-	1	17	0.0132339	0.190395
ENSG00000155754	4.04244	16.4776	0.00136958	0.0698831	C2CD6	2	201487425	201619178	-	6815	protein_coding	C2 calcium dependent domain containing 6 [Source:HGNC Symbol;Acc:HGNC:14438]	-	15	1	0.126999	0.00716518
ENSG00000178462	-3.63466	12.4206	0.00136958	0.0698831	TUBAL3	10	5393098	5404830	-	1798	protein_coding	tubulin alpha like 3 [Source:HGNC Symbol;Acc:HGNC:23534]	-	1	17	0.0320911	0.461692
ENSG00000147852	-1.37871	2.60035	0.00137049	0.0698831	VLDLR	9	2621834	2660053	+	9339	protein_coding	very low density lipoprotein receptor [Source:HGNC Symbol;Acc:HGNC:12698]	-	249	804	1.53842	4.20386
ENSG00000267023	-1.61541	3.06398	0.00137634	0.0700275	LRRC37A16P	17	68125777	68152468	-	3815	transcribed_unprocessed_pseudogene	leucine rich repeat containing 37 member A16, pseudogene [Source:HGNC Symbol;Acc:HGNC:43820]	-	32	122	0.483983	1.56156
ENSG00000204099	-1.38855	2.61816	0.00138522	0.0702496	NEU4	2	241808825	241817413	+	4689	protein_coding	neuraminidase 4 [Source:HGNC Symbol;Acc:HGNC:21328]	-	195	634	2.39955	6.6024
ENSG00000237172	-1.65582	3.15103	0.00138674	0.0702496	B3GNT9	16	67148105	67151214	-	2917	protein_coding	UDP-GlcNAc:betaGal beta-1,3-N-acetylglucosaminyltransferase 9 [Source:HGNC Symbol;Acc:HGNC:28714]	-	26	102	0.514294	1.70748
ENSG00000273568	1.95769	3.8844	0.00140429	0.0707366	AC131009.3	12	131934642	131934928	+	287	sense_intronic	novel transcript, sense intronic to PUS1	-	41	13	8.24284	2.21184
ENSG00000110700	1.33404	2.52108	0.00140744	0.0707366	RPS13	11	17074389	17077787	-	2186	protein_coding	ribosomal protein S13 [Source:HGNC Symbol;Acc:HGNC:10386]	-	11371	5599	300.14	125.07
ENSG00000236144	1.45645	2.74431	0.00143453	0.0707366	TMEM147-AS1	19	35540738	35546029	-	4859	antisense	TMEM147 antisense RNA 1 [Source:HGNC Symbol;Acc:HGNC:51273]	-	208	94	2.46997	0.944656
ENSG00000206417	-2.32969	5.02699	0.0014361	0.0707366	H1FX-AS1	3	129315392	129326225	+	3420	antisense	H1FX antisense RNA 1 [Source:HGNC Symbol;Acc:HGNC:27953]	-	6	38	0.101228	0.542563
ENSG00000137463	-2.32969	5.02699	0.0014361	0.0707366	MGARP	4	139266163	139280338	-	1339	protein_coding	mitochondria localized glutamic acid rich protein [Source:HGNC Symbol;Acc:HGNC:29969]	-	6	38	0.258551	1.38579
ENSG00000174807	-6.56817	94.8889	0.00143701	0.0707366	CD248	11	66314487	66317044	-	2558	protein_coding	CD248 molecule [Source:HGNC Symbol;Acc:HGNC:18219]	-	0	13	0	0.248162
ENSG00000280890	6.63837	99.6207	0.00143701	0.0707366	ELDR	7	55235965	55255635	-	2941	lincRNA	EGFR long non-coding downstream RNA [Source:HGNC Symbol;Acc:HGNC:49511]	-	11	0	0.215811	0
ENSG00000264769	6.63837	99.6207	0.00143701	0.0707366	AC145207.8	17	81922899	81924511	+	563	antisense	novel transcript, antisense MAFG	-	11	0	1.12735	0
ENSG00000259015	6.63837	99.6207	0.00143701	0.0707366	AL442663.4	14	72960595	72961993	+	289	processed_pseudogene	chromosome 17 open reading frame 98 (C17orf98) pseudogene	-	11	0	2.19619	0
ENSG00000158815	-6.56817	94.8889	0.00143701	0.0707366	FGF17	8	22042398	22048809	+	3287	protein_coding	fibroblast growth factor 17 [Source:HGNC Symbol;Acc:HGNC:3673]	-	0	13	0	0.193124
ENSG00000266708	6.63837	99.6207	0.00143701	0.0707366	AP001793.1	18	8635179	8636347	-	780	antisense	novel transcript, antisense to RAB12	-	11	0	0.813716	0
ENSG00000216490	6.63837	99.6207	0.00143701	0.0707366	IFI30	19	18173162	18178117	+	2481	protein_coding	IFI30, lysosomal thiol reductase [Source:HGNC Symbol;Acc:HGNC:5398]	-	11	0	0.255824	0
ENSG00000198223	-6.56817	94.8889	0.00143701	0.0707366	CSF2RA	X	1268800	1310381	+	3830	protein_coding	colony stimulating factor 2 receptor alpha subunit [Source:HGNC Symbol;Acc:HGNC:2435]	-	0	13	0	0.165744
ENSG00000111674	-1.38212	2.60651	0.00143914	0.0707366	ENO2	12	6913745	6923698	+	4281	protein_coding	enolase 2 [Source:HGNC Symbol;Acc:HGNC:3353]	-	190	615	2.56084	7.01492
ENSG00000183098	-1.34518	2.54062	0.00144199	0.0707366	GPC6	13	93226842	94407401	+	6468	protein_coding	glypican 6 [Source:HGNC Symbol;Acc:HGNC:4454]	-	694	2189	6.19105	16.526
ENSG00000142178	-1.5946	3.02011	0.00144966	0.0709631	SIK1	21	43414483	43427189	-	5268	protein_coding	salt inducible kinase 1 [Source:HGNC Symbol;Acc:HGNC:11142]	-	33	124	0.361446	1.14939
ENSG00000155792	-1.35934	2.56568	0.00146819	0.071719	DEPTOR	8	119873717	120050913	+	2622	protein_coding	DEP domain containing MTOR interacting protein [Source:HGNC Symbol;Acc:HGNC:22953]	-	334	1064	7.35002	19.8154
ENSG00000215440	1.4362	2.70608	0.00150756	0.073272	NPEPL1	20	58689131	58719238	+	7641	protein_coding	aminopeptidase like 1 [Source:HGNC Symbol;Acc:HGNC:16244]	-	216	99	1.63109	0.632671
ENSG00000181019	1.32475	2.50489	0.00151116	0.073272	NQO1	16	69706996	69726951	-	3254	protein_coding	NAD(P)H quinone dehydrogenase 1 [Source:HGNC Symbol;Acc:HGNC:2874]	-	14131	7003	250.571	105.09
ENSG00000014257	-1.51416	2.85632	0.00151211	0.073272	ACPP	3	132317367	132368298	+	4193	protein_coding	acid phosphatase, prostate [Source:HGNC Symbol;Acc:HGNC:125]	-	49	174	0.674289	2.02636
ENSG00000267244	1.74586	3.35394	0.00151258	0.073272	AC012615.6	19	1822089	1824542	+	2454	processed_transcript	uncharacterized LOC100288123 [Source:NCBI gene;Acc:100288123]	-	57	21	1.34022	0.417867
ENSG00000247626	1.35772	2.5628	0.00151945	0.0734516	MARS2	2	197705369	197708387	+	3019	protein_coding	methionyl-tRNA synthetase 2, mitochondrial [Source:HGNC Symbol;Acc:HGNC:25133]	-	667	323	12.7479	5.22435
ENSG00000109475	1.32465	2.50473	0.00152584	0.0736074	RPL34	4	108620566	108630412	+	3393	protein_coding	ribosomal protein L34 [Source:HGNC Symbol;Acc:HGNC:10340]	-	8418	4172	143.153	60.0417
ENSG00000046889	-1.43825	2.70992	0.00154592	0.0744219	PREX2	8	67952118	68237030	+	12058	protein_coding	phosphatidylinositol-3,4,5-trisphosphate dependent Rac exchange factor 2 [Source:HGNC Symbol;Acc:HGNC:22950]	-	90	303	0.430668	1.22704
ENSG00000241837	1.35279	2.55406	0.00156118	0.0748251	ATP5PO	21	33903453	33915980	-	3336	protein_coding	ATP synthase peripheral stalk subunit OSCP [Source:HGNC Symbol;Acc:HGNC:850]	-	782	380	13.5256	5.56225
ENSG00000164308	-1.9093	3.75626	0.00156395	0.0748251	ERAP2	5	96875939	96919716	+	7422	protein_coding	endoplasmic reticulum aminopeptidase 2 [Source:HGNC Symbol;Acc:HGNC:29499]	-	13	61	0.101064	0.40133
ENSG00000188763	1.85985	3.6297	0.00156395	0.0748251	FZD9	7	73433783	73436120	+	2338	protein_coding	frizzled class receptor 9 [Source:HGNC Symbol;Acc:HGNC:4047]	-	50	17	1.23396	0.355056
ENSG00000189043	1.32018	2.49697	0.00157334	0.0751198	NDUFA4	7	10931951	10940256	-	3556	protein_coding	NDUFA4, mitochondrial complex associated [Source:HGNC Symbol;Acc:HGNC:7687]	-	10864	5401	176.28	74.1661
ENSG00000231500	1.31836	2.49382	0.00157999	0.0752826	RPS18	6	33272010	33276510	+	1898	protein_coding	ribosomal protein S18 [Source:HGNC Symbol;Acc:HGNC:10401]	-	27474	13676	835.219	351.849
ENSG00000105246	-3.01156	8.06435	0.00159793	0.0755186	EBI3	19	4229498	4237531	+	1284	protein_coding	Epstein-Barr virus induced 3 [Source:HGNC Symbol;Acc:HGNC:3129]	-	2	21	0.0898752	0.798633
ENSG00000224945	-3.01156	8.06435	0.00159793	0.0755186	AL353150.1	9	89088604	89109934	-	1038	sense_intronic	novel transcript	-	2	21	0.111175	0.987904
ENSG00000255201	2.75878	6.76826	0.00159793	0.0755186	AC087623.1	8	38421889	38426096	+	534	antisense	novel transcript	-	17	3	1.83689	0.27433
ENSG00000253174	2.75878	6.76826	0.00159793	0.0755186	AC009630.2	8	41540381	41545044	-	1189	antisense	novel transcript, antisense to GINS4	-	17	3	0.824977	0.123206
ENSG00000155850	-1.35019	2.54946	0.00160325	0.0756161	SLC26A2	5	149960737	149993455	+	8606	protein_coding	solute carrier family 26 member 2 [Source:HGNC Symbol;Acc:HGNC:10994]	-	302	956	2.02479	5.42437
ENSG00000146250	-1.81789	3.52566	0.00161442	0.0759889	PRSS35	6	83512538	83525704	+	2440	protein_coding	serine protease 35 [Source:HGNC Symbol;Acc:HGNC:21387]	-	15	66	0.354712	1.32083
ENSG00000120820	2.48115	5.58342	0.0016487	0.0772313	GLT8D2	12	103988984	104064183	-	3271	protein_coding	glycosyltransferase 8 domain containing 2 [Source:HGNC Symbol;Acc:HGNC:24890]	-	23	5	0.405716	0.0746418
ENSG00000133116	-2.8649	7.28485	0.0016487	0.0772313	KL	13	33016433	33066145	+	5056	protein_coding	klotho [Source:HGNC Symbol;Acc:HGNC:6344]	-	3	28	0.0342365	0.270423
ENSG00000221890	-1.32633	2.50764	0.00166252	0.0772313	NPTXR	22	38818452	38843982	-	5784	protein_coding	neuronal pentraxin receptor [Source:HGNC Symbol;Acc:HGNC:7954]	-	680	2117	6.78353	17.8725
ENSG00000142959	-3.20302	9.20886	0.00166513	0.0772313	BEST4	1	44783585	44787705	-	2047	protein_coding	bestrophin 4 [Source:HGNC Symbol;Acc:HGNC:17106]	-	2	24	0.0563751	0.572514
ENSG00000261357	-3.20302	9.20886	0.00166513	0.0772313	AC099518.2	16	19065991	19066694	+	704	lincRNA	novel transcript	-	2	24	0.16392	1.66468
ENSG00000136367	-1.59159	3.01381	0.00166626	0.0772313	ZFHX2	14	23520855	23556192	-	10128	protein_coding	zinc finger homeobox 2 [Source:HGNC Symbol;Acc:HGNC:20152]	Homeobox	32	120	0.182306	0.578563
ENSG00000119782	-1.53739	2.90268	0.00167674	0.0772313	FKBP1B	2	24049701	24063681	+	1677	protein_coding	FK506 binding protein 1B [Source:HGNC Symbol;Acc:HGNC:3712]	-	41	148	1.41067	4.30945
ENSG00000167972	-1.92614	3.80036	0.00167756	0.0772313	ABCA3	16	2275881	2340746	-	7804	protein_coding	ATP binding cassette subfamily A member 3 [Source:HGNC Symbol;Acc:HGNC:33]	-	12	57	0.0887235	0.356657
ENSG00000198865	1.85752	3.62385	0.00167756	0.0772313	CCDC152	5	42756801	42802360	+	3431	protein_coding	coiled-coil domain containing 152 [Source:HGNC Symbol;Acc:HGNC:34438]	-	47	16	0.790409	0.227715
ENSG00000176654	-1.92614	3.80036	0.00167756	0.0772313	NANOGP1	12	7890801	7900140	+	2032	transcribed_unprocessed_pseudogene	Nanog homeobox pseudogene 1 [Source:HGNC Symbol;Acc:HGNC:23099]	-	12	57	0.340747	1.36976
ENSG00000116741	1.33107	2.5159	0.00167923	0.0772313	RGS2	1	192809039	192812283	+	2096	protein_coding	regulator of G protein signaling 2 [Source:HGNC Symbol;Acc:HGNC:9998]	-	1202	593	33.0893	13.8152
ENSG00000227615	1.35771	2.56279	0.00168067	0.0772313	AP001324.1	11	74745716	74746114	-	399	processed_pseudogene	ribosomal protein S12 (RPS12) pseudogene	-	539	261	77.9455	31.9419
ENSG00000206503	-1.35158	2.55192	0.00172485	0.079105	HLA-A	6	29941260	29945884	+	2710	protein_coding	major histocompatibility complex, class I, A [Source:HGNC Symbol;Acc:HGNC:4931]	-	231	732	4.91833	13.1897
ENSG00000187546	1.60335	3.03847	0.00173574	0.0794477	AGMO	7	15200318	15562015	-	3587	protein_coding	alkylglycerol monooxygenase [Source:HGNC Symbol;Acc:HGNC:33784]	-	81	33	1.30295	0.449237
ENSG00000053108	-1.60075	3.03301	0.00174734	0.0798213	FSTL4	5	133196455	133612564	-	6734	protein_coding	follistatin like 4 [Source:HGNC Symbol;Acc:HGNC:21389]	-	31	117	0.265622	0.84841
ENSG00000152779	-1.40267	2.6439	0.00175805	0.0801534	SLC16A12	10	89430299	89556641	-	4835	protein_coding	solute carrier family 16 member 12 [Source:HGNC Symbol;Acc:HGNC:23094]	-	102	335	1.21725	3.38331
ENSG00000182156	-1.47541	2.78063	0.00177423	0.0807326	ENPP7	17	79730919	79742222	+	3549	protein_coding	ectonucleotide pyrophosphatase/phosphodiesterase 7 [Source:HGNC Symbol;Acc:HGNC:23764]	-	57	197	0.92671	2.71052
ENSG00000136052	-1.35163	2.552	0.00180648	0.0820394	SLC41A2	12	104802553	104958744	-	5151	protein_coding	solute carrier family 41 member 2 [Source:HGNC Symbol;Acc:HGNC:31045]	-	213	675	2.38596	6.3989
ENSG00000163093	2.19943	4.59299	0.00185899	0.0842598	BBS5	2	169479178	169506655	+	4556	protein_coding	Bardet-Biedl syndrome 5 [Source:HGNC Symbol;Acc:HGNC:970]	-	30	8	0.379938	0.0857431
ENSG00000150593	-1.31555	2.48898	0.00191156	0.0864741	PDCD4	10	110871795	110900006	+	4547	protein_coding	programmed cell death 4 [Source:HGNC Symbol;Acc:HGNC:8763]	-	499	1542	6.33214	16.5597
ENSG00000217130	1.46658	2.76366	0.00192603	0.0867391	AL139100.1	6	34744176	34744673	+	498	processed_pseudogene	ribosomal protein S10 (RPS10) pseudogene	-	136	61	15.7574	5.98127
ENSG00000143977	1.30074	2.46356	0.00192733	0.0867391	SNRPG	2	70281362	70293771	-	1795	protein_coding	small nuclear ribonucleoprotein polypeptide G [Source:HGNC Symbol;Acc:HGNC:11163]	-	2715	1368	87.2731	37.2147
ENSG00000269893	1.33578	2.52412	0.00192861	0.0867391	SNHG8	4	118278709	118279823	+	923	lincRNA	small nucleolar RNA host gene 8 [Source:HGNC Symbol;Acc:HGNC:33098]	-	539	265	33.6947	14.0196
ENSG00000245970	1.67547	3.19424	0.001934	0.0868135	AP003352.1	8	98041726	98044121	+	1989	antisense	novel transcript	-	62	24	1.79859	0.589209
ENSG00000228649	1.58825	3.00684	0.00193848	0.0868402	SNHG26	7	22854178	22861579	+	2627	processed_transcript	small nucleolar RNA host gene 26 [Source:HGNC Symbol;Acc:HGNC:53131]	-	85	35	1.86695	0.65058
ENSG00000113905	-1.68303	3.21101	0.001945	0.0868402	HRG	3	186660216	186678240	+	5061	protein_coding	histidine rich glycoprotein [Source:HGNC Symbol;Acc:HGNC:5181]	-	22	88	0.250819	0.849062
ENSG00000108924	1.35796	2.56323	0.0019458	0.0868402	HLF	17	55265012	55325065	+	6602	protein_coding	HLF, PAR bZIP transcription factor [Source:HGNC Symbol;Acc:HGNC:4977]	TF_bZIP	345	167	3.01522	1.23519
ENSG00000238123	2.23717	4.7147	0.00199893	0.0888785	MID1IP1-AS1	X	38801568	38803883	-	376	antisense	MID1IP1 antisense RNA 1 [Source:HGNC Symbol;Acc:HGNC:40932]	-	27	7	4.14334	0.909082
ENSG00000086205	-1.3107	2.48063	0.00199912	0.0888785	FOLH1	11	49146635	49208670	-	3824	protein_coding	folate hydrolase 1 [Source:HGNC Symbol;Acc:HGNC:3788]	-	476	1466	7.18231	18.7201
ENSG00000235245	1.82657	3.54693	0.00201103	0.0892374	AL360181.2	10	133295187	133295977	-	626	antisense	novel transcript	-	46	16	4.23993	1.24807
ENSG00000095637	-1.29022	2.44566	0.00203418	0.0900927	SORBS1	10	95311771	95561414	-	10951	protein_coding	sorbin and SH3 domain containing 1 [Source:HGNC Symbol;Acc:HGNC:14565]	-	2106	6394	11.0963	28.511
ENSG00000163682	1.28803	2.44195	0.00204261	0.0901479	RPL9	4	39452521	39458949	-	5022	protein_coding	ribosomal protein L9 [Source:HGNC Symbol;Acc:HGNC:10369]	-	7369	3746	84.6656	36.4237
ENSG00000218226	1.80654	3.49803	0.00204509	0.0901479	TATDN2P2	6	158609706	158621636	-	2226	processed_pseudogene	TatD DNase domain containing 2 pseudogene 2 [Source:HGNC Symbol;Acc:HGNC:39255]	-	51	18	1.32196	0.394857
ENSG00000186212	-1.35722	2.56191	0.00205009	0.0901479	SOWAHB	4	76894928	76898147	-	3220	protein_coding	sosondowah ankyrin repeat domain family member B [Source:HGNC Symbol;Acc:HGNC:32958]	-	143	455	2.56245	6.89999
ENSG00000124107	1.33798	2.52797	0.00205093	0.0901479	SLPI	20	45252239	45254564	-	596	protein_coding	secretory leukocyte peptidase inhibitor [Source:HGNC Symbol;Acc:HGNC:11092]	-	438	215	42.4036	17.6151
ENSG00000121858	-1.47042	2.77103	0.00208425	0.0914397	TNFSF10	3	172505508	172523507	-	3473	protein_coding	TNF superfamily member 10 [Source:HGNC Symbol;Acc:HGNC:11925]	-	54	186	0.897148	2.61518
ENSG00000243678	1.47958	2.78868	0.00209448	0.0917153	NME2	17	51165435	51171747	+	2632	protein_coding	NME/NM23 nucleoside diphosphate kinase 2 [Source:HGNC Symbol;Acc:HGNC:7850]	-	126	56	2.76223	1.03895
ENSG00000167371	-1.39608	2.63185	0.00210246	0.0917334	PRRT2	16	29811382	29815892	+	3755	protein_coding	proline rich transmembrane protein 2 [Source:HGNC Symbol;Acc:HGNC:30500]	-	89	291	1.36759	3.78422
ENSG00000146677	1.40708	2.65201	0.00210278	0.0917334	AC004453.1	7	44467897	44468304	+	408	processed_pseudogene	ribosomal protein L32 (RPL32) pseudogene	-	201	94	28.4257	11.2502
ENSG00000197903	1.29564	2.45486	0.0021242	0.0923895	HIST1H2BK	6	27146418	27146798	-	381	protein_coding	histone cluster 1 H2B family member k [Source:HGNC Symbol;Acc:HGNC:13954]	-	1598	808	242.006	103.557
ENSG00000118898	-1.47213	2.7743	0.00212999	0.0923895	PPL	16	4882507	4960741	-	7686	protein_coding	periplakin [Source:HGNC Symbol;Acc:HGNC:9273]	-	49	169	0.36785	1.07369
ENSG00000226856	-3.54793	11.6959	0.00213372	0.0923895	THORLNC	2	118132128	118222250	-	2253	lincRNA	testis associated oncogenic lncRNA [Source:HGNC Symbol;Acc:HGNC:53788]	-	1	16	0.0256102	0.346778
ENSG00000250986	-3.54793	11.6959	0.00213372	0.0923895	LINC02600	4	3758748	3763390	-	4525	lincRNA	long intergenic non-protein coding RNA 2600 [Source:HGNC Symbol;Acc:HGNC:53177]	-	1	16	0.0127514	0.172661
ENSG00000279794	2.34435	5.0783	0.00214237	0.0925917	AC024580.1	19	56149817	56150490	+	674	TEC	TEC	-	25	6	2.1402	0.434695
ENSG00000004779	1.28747	2.441	0.00214684	0.0926127	NDUFAB1	16	23581002	23596356	-	1600	protein_coding	NADH:ubiquinone oxidoreductase subunit AB1 [Source:HGNC Symbol;Acc:HGNC:7694]	-	2523	1283	90.9855	39.1561
ENSG00000151834	-1.29899	2.46057	0.00216097	0.0929401	GABRA2	4	46248427	46475230	-	11930	protein_coding	gamma-aminobutyric acid type A receptor alpha2 subunit [Source:HGNC Symbol;Acc:HGNC:4076]	-	510	1558	2.46663	6.37705
ENSG00000264424	1.50949	2.84709	0.00216242	0.0929401	MYH4	17	10443290	10469559	-	6016	protein_coding	myosin heavy chain 4 [Source:HGNC Symbol;Acc:HGNC:7574]	-	108	47	1.03584	0.38149
ENSG00000117298	-1.27858	2.42599	0.00219861	0.0943212	ECE1	1	21217247	21345572	-	7333	protein_coding	endothelin converting enzyme 1 [Source:HGNC Symbol;Acc:HGNC:3146]	-	3264	9830	25.6829	65.4583
ENSG00000179399	-1.46728	2.76499	0.00221421	0.0948156	GPC5	13	91398607	92873682	+	3544	protein_coding	glypican 5 [Source:HGNC Symbol;Acc:HGNC:4453]	-	48	165	0.781488	2.27344
ENSG00000237550	1.27524	2.42039	0.00223165	0.0953864	RPL9P9	15	82372196	82372912	-	717	transcribed_processed_pseudogene	ribosomal protein L9 pseudogene 9 [Source:HGNC Symbol;Acc:HGNC:17251]	-	13744	7049	1106.04	480.066
ENSG00000183801	-1.57202	2.97322	0.00224377	0.0956908	OLFML1	11	7485388	7511377	+	3436	protein_coding	olfactomedin like 1 [Source:HGNC Symbol;Acc:HGNC:24473]	-	30	111	0.503782	1.57748
ENSG00000132561	-1.3235	2.50272	0.002247	0.0956908	MATN2	8	97868840	98036716	+	6933	protein_coding	matrilin 2 [Source:HGNC Symbol;Acc:HGNC:6908]	-	204	634	1.69779	4.46541
ENSG00000085117	-2.75853	6.76706	0.00227587	0.0963907	CD82	11	44564427	44620363	+	4054	protein_coding	CD82 molecule [Source:HGNC Symbol;Acc:HGNC:6210]	-	3	26	0.0426985	0.313172
ENSG00000170989	-2.75853	6.76706	0.00227587	0.0963907	S1PR1	1	101236865	101243713	+	5223	protein_coding	sphingosine-1-phosphate receptor 1 [Source:HGNC Symbol;Acc:HGNC:3165]	-	3	26	0.0331418	0.243078
ENSG00000231424	-2.75853	6.76706	0.00227587	0.0963907	AL445673.1	1	171247580	171251794	-	416	antisense	novel transcript, antisense to FMO1	-	3	26	0.416105	3.05192
ENSG00000108679	-1.28445	2.43589	0.00231365	0.0978126	LGALS3BP	17	78971238	78980109	-	3584	protein_coding	galectin 3 binding protein [Source:HGNC Symbol;Acc:HGNC:6564]	-	704	2129	11.3339	29.0068
ENSG00000129757	2.00885	4.02463	0.00232234	0.0979534	CDKN1C	11	2883213	2885773	-	2478	protein_coding	cyclin dependent kinase inhibitor 1C [Source:HGNC Symbol;Acc:HGNC:1786]	-	36	11	0.838255	0.216763
ENSG00000203724	1.4418	2.71659	0.00236457	0.0979534	C1orf53	1	197902647	197907367	+	611	protein_coding	chromosome 1 open reading frame 53 [Source:HGNC Symbol;Acc:HGNC:30003]	-	149	68	14.0708	5.43451
ENSG00000080224	-2.94164	7.68285	0.00236482	0.0979534	EPHA6	3	96814581	97752460	+	6291	protein_coding	EPH receptor A6 [Source:HGNC Symbol;Acc:HGNC:19296]	-	2	20	0.0183436	0.15524
ENSG00000183346	-2.94164	7.68285	0.00236482	0.0979534	CABCOCO1	10	61662961	61766766	+	1789	protein_coding	ciliary associated calcium binding coiled-coil 1 [Source:HGNC Symbol;Acc:HGNC:28678]	-	2	20	0.0645052	0.545899
ENSG00000285646	-2.94164	7.68285	0.00236482	0.0979534	AL021155.2	1	11908147	11913232	+	737	lincRNA	novel transcript	-	2	20	0.15658	1.32512
ENSG00000124557	-2.94164	7.68285	0.00236482	0.0979534	BTN1A1	6	26501221	26510422	+	2895	protein_coding	butyrophilin subfamily 1 member A1 [Source:HGNC Symbol;Acc:HGNC:1135]	-	2	20	0.0398617	0.337345
ENSG00000072195	-3.14198	8.82736	0.00237037	0.0979534	SPEG	2	219434846	219498287	+	17910	protein_coding	SPEG complex locus [Source:HGNC Symbol;Acc:HGNC:16901]	-	2	23	0.00644331	0.0627083
ENSG00000168993	1.30454	2.47005	0.00237432	0.0979534	CPLX1	4	784957	826198	-	2418	protein_coding	complexin 1 [Source:HGNC Symbol;Acc:HGNC:2309]	-	615	309	14.6755	6.24015
ENSG00000067221	-1.42342	2.68221	0.00238706	0.0979534	STOML1	15	73978923	73994622	-	10461	protein_coding	stomatin like 1 [Source:HGNC Symbol;Acc:HGNC:14560]	-	63	210	0.34749	0.980255
ENSG00000256433	2.15071	4.44046	0.00240987	0.0979534	AC005840.2	12	6393905	6396148	+	1803	lincRNA	novel transcript	-	29	8	0.928062	0.216664
ENSG00000266970	-1.80326	3.49008	0.00241918	0.0979534	AC061992.1	17	78360453	78373911	+	1188	lincRNA	uncharacterized LOC101928674 [Source:NCBI gene;Acc:101928674]	-	14	61	0.679965	2.5073
ENSG00000041515	-6.45396	87.6666	0.00243493	0.0979534	MYO16	13	108596152	109208007	+	9209	protein_coding	myosin XVI [Source:HGNC Symbol;Acc:HGNC:29822]	-	0	12	0	0.06363
ENSG00000233922	6.50232	90.6552	0.00243493	0.0979534	LINC01694	21	45593654	45603056	+	6810	lincRNA	long intergenic non-protein coding RNA 1694 [Source:HGNC Symbol;Acc:HGNC:52481]	-	10	0	0.0847282	0
ENSG00000169668	-6.45396	87.6666	0.00243493	0.0979534	BCRP2	22	21103016	21122285	+	5447	transcribed_unprocessed_pseudogene	breakpoint cluster region pseudogene 2 [Source:HGNC Symbol;Acc:HGNC:1015]	-	0	12	0	0.107576
ENSG00000164898	6.50232	90.6552	0.00243493	0.0979534	FMC1	7	139339457	139346319	+	1524	protein_coding	formation of mitochondrial complex V assembly factor 1 homolog [Source:HGNC Symbol;Acc:HGNC:26946]	-	10	0	0.378608	0
ENSG00000071909	-6.45396	87.6666	0.00243493	0.0979534	MYO3B	2	170178145	170655171	+	8236	protein_coding	myosin IIIB [Source:HGNC Symbol;Acc:HGNC:15576]	-	0	12	0	0.0711472
ENSG00000174844	-6.45396	87.6666	0.00243493	0.0979534	DNAH12	3	57293699	57544344	-	13275	protein_coding	dynein axonemal heavy chain 12 [Source:HGNC Symbol;Acc:HGNC:2943]	-	0	12	0	0.0441407
ENSG00000232926	6.50232	90.6552	0.00243493	0.0979534	AC000078.1	22	19887289	19887970	+	682	processed_pseudogene	ribosomal protein L8 (RPL8) pseudogene	-	10	0	0.846039	0
ENSG00000283128	6.50232	90.6552	0.00243493	0.0979534	AC009403.2	7	155474256	155644406	-	5436	processed_transcript	novel transcript	-	10	0	0.106144	0
ENSG00000081842	6.50232	90.6552	0.00243493	0.0979534	PCDHA6	5	140827958	141012344	+	6133	protein_coding	protocadherin alpha 6 [Source:HGNC Symbol;Acc:HGNC:8672]	-	10	0	0.094081	0
ENSG00000255176	6.50232	90.6552	0.00243493	0.0979534	AP000941.1	11	118636620	118638097	+	1388	antisense	novel transcript	-	10	0	0.415705	0
ENSG00000233924	6.50232	90.6552	0.00243493	0.0979534	RPSAP13	14	55004813	55005687	-	875	processed_pseudogene	ribosomal protein SA pseudogene 13 [Source:HGNC Symbol;Acc:HGNC:6505]	-	10	0	0.659427	0
ENSG00000196274	6.50232	90.6552	0.00243493	0.0979534	RF00017	15	76230048	76230390	-	343	misc_RNA		-	10	0	1.68221	0
ENSG00000206885	6.50232	90.6552	0.00243493	0.0979534	SNORA75	2	231455800	231455936	-	137	snoRNA	small nucleolar RNA, H/ACA box 75 [Source:HGNC Symbol;Acc:HGNC:32661]	-	10	0	4.21167	0
ENSG00000178828	-6.45396	87.6666	0.00243493	0.0979534	RNF186	1	19814029	19815278	-	1250	protein_coding	ring finger protein 186 [Source:HGNC Symbol;Acc:HGNC:25978]	-	0	12	0	0.468775
ENSG00000284839	-6.45396	87.6666	0.00243493	0.0979534	AC018637.1	7	32427901	32431804	+	687	lincRNA	novel transcript	-	0	12	0	0.852938
ENSG00000279581	-6.45396	87.6666	0.00243493	0.0979534	AC073862.2	12	130980667	130981367	-	701	TEC	novel transcript	-	0	12	0	0.835903
ENSG00000122223	6.50232	90.6552	0.00243493	0.0979534	CD244	1	160830160	160862855	-	2857	protein_coding	CD244 molecule [Source:HGNC Symbol;Acc:HGNC:18171]	-	10	0	0.20196	0
ENSG00000157502	-1.33892	2.52961	0.00247511	0.0993036	MUM1L1	X	106168305	106208956	+	4343	protein_coding	MUM1 like 1 [Source:HGNC Symbol;Acc:HGNC:26583]	-	134	421	1.78029	4.73353
ENSG00000084710	-1.34203	2.53508	0.00247704	0.0993036	EFR3B	2	25042130	25159137	+	10591	protein_coding	EFR3 homolog B [Source:HGNC Symbol;Acc:HGNC:29155]	-	121	381	0.659209	1.75663
ENSG00000157873	-1.63307	3.10172	0.00249964	0.100037	TNFRSF14	1	2555639	2565382	+	6219	protein_coding	TNF receptor superfamily member 14 [Source:HGNC Symbol;Acc:HGNC:11912]	-	22	85	0.204116	0.667408
ENSG00000272512	1.36624	2.57798	0.00252236	0.100773	AL645608.7	1	995966	998051	-	2086	lincRNA	novel transcript	-	212	102	5.86403	2.38769
ENSG00000198796	-1.48746	2.80396	0.00252827	0.100836	ALPK2	18	58481247	58628957	-	9431	protein_coding	alpha kinase 2 [Source:HGNC Symbol;Acc:HGNC:20565]	-	39	136	0.238606	0.704164
ENSG00000163623	-2.0305	4.08545	0.00255104	0.101396	NKX6-1	4	84491987	84498450	-	3086	protein_coding	NK6 homeobox 1 [Source:HGNC Symbol;Acc:HGNC:7839]	Homeobox	8	41	0.149578	0.648755
ENSG00000164393	-2.0305	4.08545	0.00255104	0.101396	ADGRF2	6	47656436	47697797	+	6395	protein_coding	adhesion G protein-coupled receptor F2 [Source:HGNC Symbol;Acc:HGNC:18991]	-	8	41	0.0721812	0.313066
ENSG00000238103	1.32912	2.51249	0.00256624	0.101826	RPL9P7	X	23836742	23837321	-	580	processed_pseudogene	ribosomal protein L9 pseudogene 7 [Source:HGNC Symbol;Acc:HGNC:30335]	-	324	160	32.2323	13.4705
ENSG00000162746	-1.46322	2.75724	0.00257569	0.102027	FCRLB	1	161721563	161728143	+	2592	protein_coding	Fc receptor like B [Source:HGNC Symbol;Acc:HGNC:26431]	-	42	144	0.934952	2.71282
ENSG00000213468	1.48966	2.80823	0.00260544	0.10303	FIRRE	X	131688779	131830643	-	9262	processed_transcript	firre intergenic repeating RNA element [Source:HGNC Symbol;Acc:HGNC:49627]	-	102	45	0.635434	0.237247
ENSG00000263266	1.26951	2.4108	0.00261433	0.103206	RPS7P1	17	28467822	28468406	+	585	processed_pseudogene	ribosomal protein S7 pseudogene 1 [Source:HGNC Symbol;Acc:HGNC:17081]	-	1513	779	149.231	65.0241
ENSG00000242689	2.18295	4.5408	0.002639	0.103828	CNTF	11	58622673	58625733	+	1894	protein_coding	ciliary neurotrophic factor [Source:HGNC Symbol;Acc:HGNC:2169]	-	26	7	0.792079	0.180472
ENSG00000284418	2.18295	4.5408	0.002639	0.103828	AL391117.1	9	22703516	23438700	-	1186	lincRNA	novel transcript	-	26	7	1.26492	0.288208
ENSG00000088367	-1.32627	2.50753	0.00267113	0.104914	EPB41L1	20	36091504	36232799	+	9674	protein_coding	erythrocyte membrane protein band 4.1 like 1 [Source:HGNC Symbol;Acc:HGNC:3378]	-	140	436	0.83502	2.20076
ENSG00000145425	1.2509	2.3799	0.00267924	0.105007	RPS3A	4	151099573	151104652	+	2341	protein_coding	ribosomal protein S3A [Source:HGNC Symbol;Acc:HGNC:10421]	-	22331	11648	550.404	242.964
ENSG00000224032	1.3825	2.60719	0.00268254	0.105007	EPB41L4A-AS1	5	112160526	112164276	+	3344	lincRNA	EPB41L4A antisense RNA 1 [Source:HGNC Symbol;Acc:HGNC:30749]	-	185	88	3.19213	1.28502
ENSG00000105707	-1.27392	2.41817	0.00271362	0.106046	HPN	19	35040506	35066571	+	3380	protein_coding	hepsin [Source:HGNC Symbol;Acc:HGNC:5155]	-	430	1291	7.34052	18.651
ENSG00000136960	-1.26267	2.3994	0.00277014	0.108073	ENPP2	8	119557086	119673453	-	6729	protein_coding	ectonucleotide pyrophosphatase/phosphodiesterase 2 [Source:HGNC Symbol;Acc:HGNC:3357]	-	569	1695	4.87907	12.3002
ENSG00000197565	-1.51086	2.84981	0.00280006	0.108875	COL4A6	X	108155607	108439497	-	9282	protein_coding	collagen type IV alpha 6 chain [Source:HGNC Symbol;Acc:HGNC:2208]	-	33	117	0.205139	0.615513
ENSG00000156510	-1.51086	2.84981	0.00280006	0.108875	HKDC1	10	69220303	69267559	+	4259	protein_coding	hexokinase domain containing 1 [Source:HGNC Symbol;Acc:HGNC:23302]	-	33	117	0.447076	1.34144
ENSG00000196422	-2.07274	4.20684	0.00281747	0.109005	PPP1R26	9	135479079	135488893	+	5276	protein_coding	protein phosphatase 1 regulatory subunit 26 [Source:HGNC Symbol;Acc:HGNC:29089]	-	7	37	0.076554	0.342444
ENSG00000115468	-2.07274	4.20684	0.00281747	0.109005	EFHD1	2	232606057	232682781	+	3052	protein_coding	EF-hand domain family member D1 [Source:HGNC Symbol;Acc:HGNC:29556]	-	7	37	0.132339	0.591984
ENSG00000278861	2.07937	4.22623	0.00281747	0.109005	AC117503.2	12	123655528	123656128	+	601	TEC	novel transcript	-	31	9	2.9762	0.731242
ENSG00000162817	-1.2496	2.37776	0.00288163	0.111165	C1orf115	1	220689845	220699157	+	3413	protein_coding	chromosome 1 open reading frame 115 [Source:HGNC Symbol;Acc:HGNC:25873]	-	1060	3129	17.9203	44.7674
ENSG00000116771	1.25073	2.37962	0.00288755	0.111165	AGMAT	1	15572353	15585110	-	2500	protein_coding	agmatinase [Source:HGNC Symbol;Acc:HGNC:18407]	-	2034	1061	46.9446	20.7237
ENSG00000276075	-2.51323	5.70897	0.00288962	0.111165	AC027682.6	16	67517862	67528675	-	883	antisense	uncharacterized LOC100505942 [Source:NCBI gene;Acc:100505942]	-	4	29	0.261381	1.60373
ENSG00000135346	1.96834	3.91318	0.00289243	0.111165	CGA	6	87085498	87095406	-	2284	protein_coding	glycoprotein hormones, alpha polypeptide [Source:HGNC Symbol;Acc:HGNC:1885]	-	35	11	0.884193	0.235174
ENSG00000108187	-1.49236	2.81349	0.00290518	0.111471	PBLD	10	68282660	68333049	-	5172	protein_coding	phenazine biosynthesis like protein domain containing [Source:HGNC Symbol;Acc:HGNC:23301]	-	34	119	0.379311	1.12352
ENSG00000148357	1.52524	2.87834	0.00291647	0.111536	HMCN2	9	130265882	130434123	+	20363	protein_coding	hemicentin 2 [Source:HGNC Symbol;Acc:HGNC:21293]	-	86	37	0.243687	0.0887264
ENSG00000110244	-1.54068	2.90932	0.00291647	0.111536	APOA4	11	116820700	116823306	-	1473	protein_coding	apolipoprotein A4 [Source:HGNC Symbol;Acc:HGNC:602]	-	29	105	1.13598	3.4808
ENSG00000135521	1.26351	2.4008	0.0030043	0.114563	LTV1	6	143843344	143863812	+	1847	protein_coding	LTV1 ribosome biogenesis factor [Source:HGNC Symbol;Acc:HGNC:21173]	-	737	381	23.0237	10.0728
ENSG00000135506	-1.23849	2.35952	0.00300547	0.114563	OS9	12	57693955	57721557	+	5169	protein_coding	OS9, endoplasmic reticulum lectin [Source:HGNC Symbol;Acc:HGNC:16994]	-	2695	7894	30.0834	74.5733
ENSG00000144152	-1.34361	2.53785	0.00307568	0.117047	FBLN7	2	112138385	112188216	+	6578	protein_coding	fibulin 7 [Source:HGNC Symbol;Acc:HGNC:26740]	-	85	268	0.74559	1.98945
ENSG00000217716	1.72912	3.31525	0.00308402	0.117173	RPS10P3	9	88016300	88016793	+	494	processed_pseudogene	ribosomal protein S10 pseudogene 3 [Source:HGNC Symbol;Acc:HGNC:23684]	-	51	19	5.95687	1.8781
ENSG00000119711	-1.27716	2.42361	0.00310356	0.117531	ALDH6A1	14	74056850	74084493	-	6680	protein_coding	aldehyde dehydrogenase 6 family member A1 [Source:HGNC Symbol;Acc:HGNC:7179]	-	209	629	1.80528	4.59798
ENSG00000161970	1.27675	2.42293	0.0031133	0.117531	RPL26	17	8377516	8383250	-	2513	protein_coding	ribosomal protein L26 [Source:HGNC Symbol;Acc:HGNC:10327]	-	533	273	12.238	5.30473
ENSG00000140092	-1.26488	2.40308	0.00312676	0.117531	FBLN5	14	91869412	91947987	-	4973	protein_coding	fibulin 5 [Source:HGNC Symbol;Acc:HGNC:3602]	-	308	919	3.57361	9.02381
ENSG00000004948	-1.66316	3.1671	0.00313291	0.117531	CALCR	7	93424487	93574730	-	4227	protein_coding	calcitonin receptor [Source:HGNC Symbol;Acc:HGNC:1440]	-	19	75	0.259356	0.866407
ENSG00000187955	-1.33906	2.52987	0.00313626	0.117531	COL14A1	8	120059780	120372036	+	8647	protein_coding	collagen type XIV alpha 1 chain [Source:HGNC Symbol;Acc:HGNC:2191]	-	91	286	0.607227	1.61508
ENSG00000170689	-1.78621	3.44907	0.00314483	0.117531	HOXB9	17	48621159	48626356	-	2581	protein_coding	homeobox B9 [Source:HGNC Symbol;Acc:HGNC:5120]	Homeobox	13	56	0.290623	1.05948
ENSG00000277268	-1.78621	3.44907	0.00314483	0.117531	LHX1-DT	17	36861674	36936661	-	2544	antisense	LHX1 divergent transcript [Source:HGNC Symbol;Acc:HGNC:53778]	-	13	56	0.29485	1.07489
ENSG00000100784	-2.70225	6.50817	0.00314942	0.117531	RPS6KA5	14	90847862	91060636	-	27976	protein_coding	ribosomal protein S6 kinase A5 [Source:HGNC Symbol;Acc:HGNC:10434]	-	3	25	0.00618743	0.0436362
ENSG00000175785	2.35057	5.10025	0.00314942	0.117531	PRIMA1	14	93718298	93788481	-	3892	protein_coding	proline rich membrane anchor 1 [Source:HGNC Symbol;Acc:HGNC:18319]	-	21	5	0.31133	0.0627321
ENSG00000245248	2.35057	5.10025	0.00314942	0.117531	USP2-AS1	11	119381778	119526664	+	4762	antisense	USP2 antisense RNA 1 (head to head) [Source:HGNC Symbol;Acc:HGNC:48673]	-	21	5	0.254451	0.0512712
ENSG00000275318	2.35057	5.10025	0.00314942	0.117531	AL136981.2	9	92840955	92841688	-	734	unprocessed_pseudogene	novel zinc finger protein pseudogene	-	21	5	1.65081	0.332634
ENSG00000179292	-1.2726	2.41596	0.00315411	0.117531	TMEM151A	11	66291870	66296664	+	2562	protein_coding	transmembrane protein 151A [Source:HGNC Symbol;Acc:HGNC:28497]	-	224	672	5.0448	12.8081
ENSG00000166562	1.23724	2.35747	0.00316147	0.117617	SEC11C	18	59139477	59158836	+	4511	protein_coding	SEC11 homolog C, signal peptidase complex subunit [Source:HGNC Symbol;Acc:HGNC:23400]	-	2355	1240	30.1226	13.4228
ENSG00000183463	-1.89041	3.70739	0.00319623	0.11872	URAD	13	27977714	27988654	-	931	protein_coding	ureidoimidazoline (2-oxo-4-hydroxy-4-carboxy-5-) decarboxylase [Source:HGNC Symbol;Acc:HGNC:17785]	-	11	51	0.681739	2.67494
ENSG00000123843	-1.25592	2.3882	0.00320715	0.118936	C4BPB	1	207088842	207099993	+	3219	protein_coding	complement component 4 binding protein beta [Source:HGNC Symbol;Acc:HGNC:1328]	-	345	1023	6.18405	15.5184
ENSG00000282965	-1.29465	2.45318	0.00321445	0.119017	AP001005.3	18	49815	73545	-	741	lincRNA	novel transcript	-	150	457	11.6801	30.1156
ENSG00000265681	1.26329	2.40043	0.00322308	0.119146	RPL17	18	49488453	49492523	-	2466	protein_coding	ribosomal protein L17 [Source:HGNC Symbol;Acc:HGNC:10307]	-	617	319	14.4367	6.3167
ENSG00000236255	1.44954	2.73121	0.00323941	0.11956	AC009404.1	2	117833937	117841658	+	4058	lincRNA	novel transcript	-	108	49	1.53563	0.589626
ENSG00000173482	-1.23206	2.34903	0.00331475	0.121448	PTPRM	18	7566782	8406861	+	9900	protein_coding	protein tyrosine phosphatase, receptor type M [Source:HGNC Symbol;Acc:HGNC:9675]	-	955	2785	5.566	13.7367
ENSG00000118257	-1.29957	2.46155	0.00332341	0.121448	NRP2	2	205681990	205798133	+	13896	protein_coding	neuropilin 2 [Source:HGNC Symbol;Acc:HGNC:8005]	-	122	373	0.506576	1.31073
ENSG00000069482	3.83762	14.2968	0.00334606	0.121448	GAL	11	68683779	68691175	+	1300	protein_coding	galanin and GMAP prepropeptide [Source:HGNC Symbol;Acc:HGNC:4114]	-	13	1	0.576999	0.0375621
ENSG00000270175	-3.45564	10.9712	0.00334606	0.121448	AC023509.4	12	53500162	53500936	-	775	antisense	novel transcript, antisense to TARBP2	-	1	15	0.0744515	0.94511
ENSG00000164674	-3.45564	10.9712	0.00334606	0.121448	SYTL3	6	158650014	158764876	+	2896	protein_coding	synaptotagmin like 3 [Source:HGNC Symbol;Acc:HGNC:15587]	-	1	15	0.019924	0.252921
ENSG00000160678	3.83762	14.2968	0.00334606	0.121448	S100A1	1	153627926	153632039	+	3030	protein_coding	S100 calcium binding protein A1 [Source:HGNC Symbol;Acc:HGNC:10486]	-	13	1	0.247557	0.0161157
ENSG00000147127	-3.45564	10.9712	0.00334606	0.121448	RAB41	X	70282093	70285002	+	1344	protein_coding	RAB41, member RAS oncogene family [Source:HGNC Symbol;Acc:HGNC:18293]	-	1	15	0.0429315	0.544985
ENSG00000176402	-3.45564	10.9712	0.00334606	0.121448	GJC3	7	99923269	99929620	-	1116	protein_coding	gap junction protein gamma 3 [Source:HGNC Symbol;Acc:HGNC:17495]	-	1	15	0.0517024	0.656326
ENSG00000212493	3.83762	14.2968	0.00334606	0.121448	SNORD19	3	52689248	52689315	+	68	snoRNA	small nucleolar RNA, C/D box 19 [Source:HGNC Symbol;Acc:HGNC:32717]	-	13	1	11.0309	0.718098
ENSG00000231083	-3.45564	10.9712	0.00334606	0.121448	AC011747.1	2	8600892	8622942	-	565	lincRNA	novel transcript	-	1	15	0.102124	1.29639
ENSG00000075461	-1.51914	2.86621	0.00335718	0.121448	CACNG4	17	66964910	67033398	+	3380	protein_coding	calcium voltage-gated channel auxiliary subunit gamma 4 [Source:HGNC Symbol;Acc:HGNC:1408]	-	30	107	0.512129	1.54582
ENSG00000115525	-1.31131	2.48166	0.00335849	0.121448	ST3GAL5	2	85837120	85905199	-	16318	protein_coding	ST3 beta-galactoside alpha-2,3-sialyltransferase 5 [Source:HGNC Symbol;Acc:HGNC:10872]	-	109	336	0.38542	1.00546
ENSG00000109738	-1.47343	2.77682	0.00338351	0.121448	GLRB	4	157076057	157172090	+	3459	protein_coding	glycine receptor beta [Source:HGNC Symbol;Acc:HGNC:4329]	-	33	114	0.550476	1.60934
ENSG00000070526	2.44169	5.43277	0.00338513	0.121448	ST6GALNAC1	17	76624761	76643838	-	3448	protein_coding	ST6 N-acetylgalactosaminide alpha-2,6-sialyltransferase 1 [Source:HGNC Symbol;Acc:HGNC:23614]	-	18	4	0.301217	0.0566481
ENSG00000261326	2.44169	5.43277	0.00338513	0.121448	LINC01355	1	23281308	23286752	-	5445	lincRNA	long intergenic non-protein coding RNA 1355 [Source:HGNC Symbol;Acc:HGNC:50584]	-	18	4	0.190743	0.0358719
ENSG00000261207	2.44169	5.43277	0.00338513	0.121448	AL031717.1	16	1751559	1752262	-	565	antisense	novel transcript, antisense to MAPK8IP3	-	18	4	1.83823	0.345704
ENSG00000126838	2.44169	5.43277	0.00338513	0.121448	PZP	12	9148840	9208370	-	6227	protein_coding	PZP, alpha-2-macroglobulin like [Source:HGNC Symbol;Acc:HGNC:9750]	-	18	4	0.166789	0.0313671
ENSG00000204745	1.71928	3.29271	0.00338979	0.121448	AC083899.1	2	87125198	87196629	+	3795	unprocessed_pseudogene	anaphase promoting complex subunit 1 (ANAPC1) pseudogene	-	48	18	0.729801	0.231608
ENSG00000114391	1.22032	2.32998	0.00339281	0.121448	RPL24	3	101681091	101686782	-	2682	protein_coding	ribosomal protein L24 [Source:HGNC Symbol;Acc:HGNC:10325]	-	14079	7501	302.892	136.569
ENSG00000137261	-1.37301	2.59011	0.00339714	0.121448	KIAA0319	6	24544104	24646155	-	7172	protein_coding	KIAA0319 [Source:HGNC Symbol;Acc:HGNC:21580]	-	64	206	0.51489	1.40255
ENSG00000260806	1.60405	3.03996	0.00340706	0.121448	AL163051.1	14	96500810	96502321	-	1512	antisense	novel transcript, antisense to PAPOLA	-	59	24	2.25152	0.77509
ENSG00000126249	1.41646	2.6693	0.00343067	0.121448	PDCD2L	19	34404384	34426168	+	1431	protein_coding	programmed cell death 2 like [Source:HGNC Symbol;Acc:HGNC:28194]	-	112	52	4.51599	1.77442
ENSG00000091986	-1.24521	2.37053	0.00344435	0.121448	CCDC80	3	112596794	112649530	-	13071	protein_coding	coiled-coil domain containing 80 [Source:HGNC Symbol;Acc:HGNC:30649]	-	370	1089	1.63331	4.06829
ENSG00000131174	1.22524	2.33795	0.00345425	0.121448	COX7B	X	77899438	77907373	+	3024	protein_coding	cytochrome c oxidase subunit 7B [Source:HGNC Symbol;Acc:HGNC:2291]	-	2392	1270	45.6409	20.5076
ENSG00000133805	-1.82143	3.53431	0.0034764	0.121448	AMPD3	11	10308313	10507579	+	6793	protein_coding	adenosine monophosphate deaminase 3 [Source:HGNC Symbol;Acc:HGNC:470]	-	12	53	0.101928	0.380984
ENSG00000100342	-1.82143	3.53431	0.0034764	0.121448	APOL1	22	36253010	36267530	+	3519	protein_coding	apolipoprotein L1 [Source:HGNC Symbol;Acc:HGNC:618]	-	12	53	0.19676	0.735444
ENSG00000150471	-1.49869	2.82587	0.00347955	0.121448	ADGRL3	4	61201258	62078335	+	13991	protein_coding	adhesion G protein-coupled receptor L3 [Source:HGNC Symbol;Acc:HGNC:20974]	-	31	109	0.127846	0.380426
ENSG00000171388	-2.29492	4.90728	0.00348955	0.121448	APLN	X	129645259	129654937	-	3205	protein_coding	apelin [Source:HGNC Symbol;Acc:HGNC:16665]	-	5	31	0.0900154	0.472309
ENSG00000085741	-2.29492	4.90728	0.00348955	0.121448	WNT11	11	76186325	76210736	-	2401	protein_coding	Wnt family member 11 [Source:HGNC Symbol;Acc:HGNC:12776]	-	5	31	0.120158	0.630467
ENSG00000165475	-1.25146	2.38082	0.00350751	0.121448	CRYL1	13	20403666	20525873	-	4327	protein_coding	crystallin lambda 1 [Source:HGNC Symbol;Acc:HGNC:18246]	-	274	810	3.65375	9.14094
ENSG00000026508	-2.86816	7.30135	0.00351516	0.121448	CD44	11	35138870	35232402	+	10004	protein_coding	CD44 molecule (Indian blood group) [Source:HGNC Symbol;Acc:HGNC:1681]	-	2	19	0.0115354	0.0927412
ENSG00000266947	-2.86816	7.30135	0.00351516	0.121448	AC022916.1	17	35231450	35242963	-	2814	antisense	novel transcript, antisense SLFN5	-	2	19	0.0410092	0.329703
ENSG00000203814	2.67191	6.37272	0.00351516	0.121448	HIST2H2BF	1	149782689	149812373	-	3196	protein_coding	histone cluster 2 H2B family member f [Source:HGNC Symbol;Acc:HGNC:24700]	-	16	3	0.28886	0.0458361
ENSG00000164404	3.22539	9.35277	0.00351516	0.121448	GDF9	5	132861181	132866884	-	3279	protein_coding	growth differentiation factor 9 [Source:HGNC Symbol;Acc:HGNC:4224]	-	16	2	0.281549	0.0297839
ENSG00000277150	-2.86816	7.30135	0.00351516	0.121448	F8A3	X	155456914	155458672	-	1759	protein_coding	coagulation factor VIII associated 3 [Source:HGNC Symbol;Acc:HGNC:31850]	-	2	19	0.0656053	0.527449
ENSG00000213654	2.67191	6.37272	0.00351516	0.121448	GPSM3	6	32190766	32195523	-	1854	protein_coding	G protein signaling modulator 3 [Source:HGNC Symbol;Acc:HGNC:13945]	-	16	3	0.497949	0.0790141
ENSG00000249641	-2.86816	7.30135	0.00351516	0.121448	HOXC13-AS	12	53935328	53939643	-	1408	antisense	HOXC13 antisense RNA [Source:HGNC Symbol;Acc:HGNC:43753]	-	2	19	0.0819601	0.658937
ENSG00000284773	-2.86816	7.30135	0.00351516	0.121448	AC114490.3	1	34974356	34985313	-	3163	protein_coding	novel protein	-	2	19	0.0364843	0.293324
ENSG00000271869	3.22539	9.35277	0.00351516	0.121448	AC026979.2	8	30155830	30156232	-	403	lincRNA	novel transcript	-	16	2	2.29081	0.242336
ENSG00000225920	3.22539	9.35277	0.00351516	0.121448	RIMKLBP2	1	219199914	219200567	-	654	processed_pseudogene	ribosomal modification protein rimK like family member B pseudogene 2 [Source:HGNC Symbol;Acc:HGNC:39163]	-	16	2	1.41162	0.149329
ENSG00000173261	3.22539	9.35277	0.00351516	0.121448	PLAC8L1	5	146084386	146104369	-	656	protein_coding	PLAC8 like 1 [Source:HGNC Symbol;Acc:HGNC:31746]	-	16	2	1.40731	0.148874
ENSG00000199053	3.22539	9.35277	0.00351516	0.121448	MIR324	17	7223297	7223379	-	83	miRNA	microRNA 324 [Source:HGNC Symbol;Acc:HGNC:31767]	-	16	2	11.1229	1.17664
ENSG00000277103	2.67191	6.37272	0.00351516	0.121448	AL445670.1	9	97151894	97152694	-	801	processed_pseudogene	sorting nexin 18 (SNX18) pseudogene	-	16	3	1.15256	0.182886
ENSG00000158806	-1.54164	2.91125	0.00352863	0.121732	NPM2	8	22024125	22036897	+	2063	protein_coding	nucleophosmin/nucleoplasmin 2 [Source:HGNC Symbol;Acc:HGNC:7930]	-	24	87	0.671254	2.05927
ENSG00000196972	-1.90896	3.75538	0.00355334	0.122403	SMIM10L2B	X	135094987	135098634	-	2737	protein_coding	small integral membrane protein 10 like 2B [Source:HGNC Symbol;Acc:HGNC:34500]	-	10	47	0.210814	0.838525
ENSG00000273706	-1.64383	3.12495	0.00359568	0.123679	LHX1	17	36936785	36944612	+	4882	protein_coding	LIM homeobox 1 [Source:HGNC Symbol;Acc:HGNC:6593]	-	19	74	0.224559	0.740162
ENSG00000272767	-2.03336	4.09356	0.00360343	0.123762	JMJD1C-AS1	10	63465229	63466563	+	1335	antisense	JMJD1C antisense RNA 1 [Source:HGNC Symbol;Acc:HGNC:28222]	-	7	36	0.302546	1.31678
ENSG00000115255	-1.21327	2.31862	0.00366795	0.125792	REEP6	19	1490747	1497927	+	2449	protein_coding	receptor accessory protein 6 [Source:HGNC Symbol;Acc:HGNC:30078]	-	1998	5751	47.0741	114.669
ENSG00000196756	1.24734	2.37403	0.00368079	0.126047	SNHG17	20	38420588	38435353	-	4186	processed_transcript	small nucleolar RNA host gene 17 [Source:HGNC Symbol;Acc:HGNC:48600]	-	593	310	8.17392	3.61622
ENSG00000143036	-1.21416	2.32005	0.00369425	0.126322	SLC44A3	1	94820342	94895246	+	2869	protein_coding	solute carrier family 44 member 3 [Source:HGNC Symbol;Acc:HGNC:28689]	-	1444	4159	29.041	70.7866
ENSG00000168994	-1.27238	2.41559	0.00372946	0.127338	PXDC1	6	3722614	3752026	-	2474	protein_coding	PX domain containing 1 [Source:HGNC Symbol;Acc:HGNC:21361]	-	147	441	3.42841	8.70426
ENSG00000142156	-1.22789	2.34225	0.00376051	0.12821	COL6A1	21	45981737	46005050	+	5343	protein_coding	collagen type VI alpha 1 chain [Source:HGNC Symbol;Acc:HGNC:2211]	-	435	1265	4.69763	11.5611
ENSG00000197375	-1.26923	2.41033	0.0038119	0.129772	SLC22A5	5	132369752	132395614	+	12788	protein_coding	solute carrier family 22 member 5 [Source:HGNC Symbol;Acc:HGNC:10969]	-	152	455	0.685829	1.73741
ENSG00000271425	-1.50717	2.84252	0.00383238	0.130279	NBPF10	1	146064699	146144804	-	13249	protein_coding	NBPF member 10 [Source:HGNC Symbol;Acc:HGNC:31992]	-	26	92	0.113231	0.339076
ENSG00000080031	-1.24915	2.37701	0.00385235	0.130766	PTPRH	19	55181248	55209506	-	4344	protein_coding	protein tyrosine phosphatase, receptor type H [Source:HGNC Symbol;Acc:HGNC:9672]	-	207	611	2.74951	6.86822
ENSG00000225151	-1.86191	3.6349	0.00387003	0.131175	GOLGA2P7	15	84199311	84230136	-	4915	transcribed_unprocessed_pseudogene	GOLGA2 pseudogene 7 [Source:HGNC Symbol;Acc:HGNC:49516]	-	11	50	0.129135	0.496752
ENSG00000077585	-1.39564	2.63105	0.00387827	0.13121	GPR137B	1	236142505	236221865	+	2309	protein_coding	G protein-coupled receptor 137B [Source:HGNC Symbol;Acc:HGNC:11862]	-	48	157	1.19948	3.32023
ENSG00000146966	-1.23647	2.35621	0.00389769	0.13121	DENND2A	7	140518420	140673993	-	5148	protein_coding	DENN domain containing 2A [Source:HGNC Symbol;Acc:HGNC:22212]	-	269	787	3.01501	7.46499
ENSG00000227014	-2.41064	5.31712	0.00390492	0.13121	AC007285.1	7	29988600	30027543	+	2836	antisense	novel transcript	-	4	27	0.0813821	0.46489
ENSG00000228549	-2.46285	5.51304	0.00390492	0.13121	BX284668.2	1	16870945	16874092	+	2963	lincRNA	novel transcript	-	4	28	0.0778939	0.461444
ENSG00000131482	-2.41064	5.31712	0.00390492	0.13121	G6PC	17	42900797	42913369	+	3296	protein_coding	glucose-6-phosphatase catalytic subunit [Source:HGNC Symbol;Acc:HGNC:4056]	-	4	27	0.0700241	0.400009
ENSG00000253897	-2.41064	5.31712	0.00390492	0.13121	AC034205.2	5	151366299	151436953	-	2058	transcribed_unprocessed_pseudogene	solute carrier family 36 (proton/amino acid symporter) pseudogene	-	4	27	0.112147	0.640636
ENSG00000126953	1.25086	2.37983	0.00391516	0.131364	TIMM8A	X	101345659	101349196	-	3538	protein_coding	translocase of inner mitochondrial membrane 8A [Source:HGNC Symbol;Acc:HGNC:11817]	-	443	231	7.22472	3.18821
ENSG00000204580	-1.25029	2.37889	0.00396103	0.132051	DDR1	6	30876421	30900156	+	9122	protein_coding	discoidin domain receptor tyrosine kinase 1 [Source:HGNC Symbol;Acc:HGNC:2730]	-	196	579	1.23977	3.09943
ENSG00000187634	-1.2556	2.38766	0.00396224	0.132051	SAMD11	1	923928	944581	+	4166	protein_coding	sterile alpha motif domain containing 11 [Source:HGNC Symbol;Acc:HGNC:28706]	-	172	510	2.38223	5.97783
ENSG00000242114	1.42707	2.689	0.00396677	0.132051	MTFP1	22	30425530	30429053	+	1696	protein_coding	mitochondrial fission process 1 [Source:HGNC Symbol;Acc:HGNC:26945]	-	89	41	3.02788	1.18046
ENSG00000121552	1.30344	2.46817	0.00397128	0.132051	CSTA	3	122325244	122341972	+	1373	protein_coding	cystatin A [Source:HGNC Symbol;Acc:HGNC:2481]	-	197	99	8.27886	3.52093
ENSG00000260461	-1.81409	3.51638	0.00398079	0.132051	AL133355.1	10	103877374	103879761	-	2388	sense_overlapping	novel transcript, overlapping to OBFC1	-	10	44	0.241624	0.899728
ENSG00000130234	-1.81409	3.51638	0.00398079	0.132051	ACE2	X	15561033	15602148	-	3926	protein_coding	angiotensin I converting enzyme 2 [Source:HGNC Symbol;Acc:HGNC:13557]	-	10	44	0.146969	0.547262
ENSG00000234797	1.23274	2.35013	0.00398781	0.132051	RPS3AP6	15	59768352	59769146	+	795	processed_pseudogene	ribosomal protein S3A pseudogene 6 [Source:HGNC Symbol;Acc:HGNC:18630]	-	623	329	45.2164	20.2079
ENSG00000088340	-1.37251	2.5892	0.0040023	0.132051	FER1L4	20	35558737	35607562	-	9067	transcribed_unitary_pseudogene	fer-1 like family member 4, pseudogene [Source:HGNC Symbol;Acc:HGNC:15801]	-	55	177	0.350005	0.953241
ENSG00000221994	-1.73067	3.31883	0.00401511	0.132051	ZNF630	X	47983356	48071658	-	3676	protein_coding	zinc finger protein 630 [Source:HGNC Symbol;Acc:HGNC:28855]	zf-C2H2	14	58	0.219749	0.770452
ENSG00000104081	-1.20724	2.30896	0.004023	0.132051	BMF	15	40087890	40108892	-	5447	protein_coding	Bcl2 modifying factor [Source:HGNC Symbol;Acc:HGNC:24132]	-	854	2448	9.04639	21.9456
ENSG00000114796	-1.2274	2.34145	0.00403112	0.132051	KLHL24	3	183635568	183684477	+	8650	protein_coding	kelch like family member 24 [Source:HGNC Symbol;Acc:HGNC:25947]	-	334	971	2.22795	5.48146
ENSG00000163635	1.9752	3.93182	0.00406065	0.132051	ATXN7	3	63898399	64003453	+	9183	protein_coding	ataxin 7 [Source:HGNC Symbol;Acc:HGNC:10560]	-	32	10	0.201067	0.0531751
ENSG00000158683	2.04802	4.13539	0.00406587	0.132051	PKD1L1	7	47740202	47948491	-	10250	protein_coding	polycystin 1 like 1, transient receptor potential channel interacting [Source:HGNC Symbol;Acc:HGNC:18053]	-	27	8	0.15199	0.0381118
ENSG00000186918	-1.21223	2.31695	0.00407039	0.132051	ZNF395	8	28345585	28402701	-	5819	protein_coding	zinc finger protein 395 [Source:HGNC Symbol;Acc:HGNC:18737]	-	567	1631	5.62224	13.6867
ENSG00000153395	-1.20895	2.31169	0.00408087	0.132051	LPCAT1	5	1456480	1523977	-	6494	protein_coding	lysophosphatidylcholine acyltransferase 1 [Source:HGNC Symbol;Acc:HGNC:25718]	-	646	1854	5.73978	13.9409
ENSG00000105612	-1.23284	2.35029	0.00408932	0.132051	DNASE2	19	12875211	12881468	-	2389	protein_coding	deoxyribonuclease 2, lysosomal [Source:HGNC Symbol;Acc:HGNC:2960]	-	245	715	5.91732	14.6145
ENSG00000179776	-1.6166	3.06651	0.00409161	0.132051	CDH5	16	66366622	66404786	+	6082	protein_coding	cadherin 5 [Source:HGNC Symbol;Acc:HGNC:1764]	-	17	65	0.161279	0.521867
ENSG00000113361	-1.24685	2.37323	0.00409845	0.132051	CDH6	5	31193750	31329146	+	12379	protein_coding	cadherin 6 [Source:HGNC Symbol;Acc:HGNC:1765]	-	189	557	0.88095	2.19716
ENSG00000158865	-1.37612	2.5957	0.0041043	0.132051	SLC5A11	16	24845841	24911628	+	3415	protein_coding	solute carrier family 5 member 11 [Source:HGNC Symbol;Acc:HGNC:23091]	-	53	171	0.895489	2.44511
ENSG00000134775	-1.40188	2.64246	0.0041257	0.132051	FHOD3	18	36297714	36780055	+	7965	protein_coding	formin homology 2 domain containing 3 [Source:HGNC Symbol;Acc:HGNC:26178]	-	42	138	0.304255	0.846031
ENSG00000122756	-6.32992	80.4444	0.00417417	0.132051	CNTFR	9	34551432	34590140	-	2111	protein_coding	ciliary neurotrophic factor receptor [Source:HGNC Symbol;Acc:HGNC:2170]	-	0	11	0	0.254447
ENSG00000180875	-6.32992	80.4444	0.00417417	0.132051	GREM2	1	240489573	240612149	-	4170	protein_coding	gremlin 2, DAN family BMP antagonist [Source:HGNC Symbol;Acc:HGNC:17655]	-	0	11	0	0.12881
ENSG00000106852	6.35208	81.6897	0.00417417	0.132051	LHX6	9	122202577	122229626	-	5748	protein_coding	LIM homeobox 6 [Source:HGNC Symbol;Acc:HGNC:21735]	Homeobox	9	0	0.0903443	0
ENSG00000260317	-6.32992	80.4444	0.00417417	0.132051	AC009812.4	8	80541300	80543104	+	1805	lincRNA	novel transcript	-	0	11	0	0.297583
ENSG00000183876	6.35208	81.6897	0.00417417	0.132051	ARSI	5	150296343	150339307	-	3269	protein_coding	arylsulfatase family member I [Source:HGNC Symbol;Acc:HGNC:32521]	-	9	0	0.158856	0
ENSG00000254910	-6.32992	80.4444	0.00417417	0.132051	AC136475.2	11	310139	311141	-	392	antisense	novel transcript	-	0	11	0	1.37025
ENSG00000243289	6.35208	81.6897	0.00417417	0.132051	AGAP13P	10	46816516	46832476	+	363	unprocessed_pseudogene	ArfGAP with GTPase domain, ankyrin repeat and PH domain 13, pseudogene [Source:HGNC Symbol;Acc:HGNC:23499]	-	9	0	1.43058	0
ENSG00000215915	6.35208	81.6897	0.00417417	0.132051	ATAD3C	1	1449689	1470158	+	3976	protein_coding	ATPase family, AAA domain containing 3C [Source:HGNC Symbol;Acc:HGNC:32151]	-	9	0	0.130608	0
ENSG00000258048	6.35208	81.6897	0.00417417	0.132051	AC073569.2	12	79690144	79778451	+	354	lincRNA	novel transcript	-	9	0	1.46695	0
ENSG00000245025	6.35208	81.6897	0.00417417	0.132051	AC107959.1	8	22984596	23019335	-	2268	antisense	novel transcript, antisense to RHOBTB2	-	9	0	0.228968	0
ENSG00000280069	6.35208	81.6897	0.00417417	0.132051	AC127024.8	17	30738182	30740275	+	2094	TEC	TEC	-	9	0	0.247994	0
ENSG00000270948	6.35208	81.6897	0.00417417	0.132051	MTDHP1	7	64942143	64942926	-	784	processed_pseudogene	metadherin pseudogene 1 [Source:HGNC Symbol;Acc:HGNC:52357]	-	9	0	0.662371	0
ENSG00000219438	6.35208	81.6897	0.00417417	0.132051	FAM19A5	22	48489460	48850912	+	3173	protein_coding	family with sequence similarity 19 member A5, C-C motif chemokine like [Source:HGNC Symbol;Acc:HGNC:21592]	-	9	0	0.163662	0
ENSG00000185958	6.35208	81.6897	0.00417417	0.132051	FAM186A	12	50326230	50396622	-	8296	protein_coding	family with sequence similarity 186 member A [Source:HGNC Symbol;Acc:HGNC:26980]	-	9	0	0.0625963	0
ENSG00000267394	-6.32992	80.4444	0.00417417	0.132051	AC004596.1	17	44198882	44216565	+	528	antisense	novel transcript, antisense to ATXN7L3	-	0	11	0	1.01731
ENSG00000270165	6.35208	81.6897	0.00417417	0.132051	AC010530.1	16	67738588	67739922	-	569	sense_intronic	novel transcript	-	9	0	0.912652	0
ENSG00000272567	6.35208	81.6897	0.00417417	0.132051	AC109347.2	4	112272968	112273316	-	349	lincRNA	novel transcript	-	9	0	1.48796	0
ENSG00000274317	6.35208	81.6897	0.00417417	0.132051	LINC02334	13	37934565	38048169	+	4959	lincRNA	long intergenic non-protein coding RNA 2334 [Source:HGNC Symbol;Acc:HGNC:53254]	-	9	0	0.104718	0
ENSG00000165178	-6.32992	80.4444	0.00417417	0.132051	NCF1C	7	75156639	75172044	-	1427	unprocessed_pseudogene	neutrophil cytosolic factor 1C pseudogene [Source:HGNC Symbol;Acc:HGNC:32523]	-	0	11	0	0.37641
ENSG00000255355	-6.32992	80.4444	0.00417417	0.132051	AP000640.2	11	59669312	59676041	+	914	processed_transcript	novel transcript	-	0	11	0	0.587678
ENSG00000225826	-6.32992	80.4444	0.00417417	0.132051	LINC00626	1	168786939	168792886	+	955	lincRNA	long intergenic non-protein coding RNA 626 [Source:HGNC Symbol;Acc:HGNC:44257]	-	0	11	0	0.562448
ENSG00000234199	6.35208	81.6897	0.00417417	0.132051	LINC01191	2	113979569	114007302	+	844	lincRNA	long intergenic non-protein coding RNA 1191 [Source:HGNC Symbol;Acc:HGNC:49595]	-	9	0	0.615283	0
ENSG00000198712	1.19064	2.28253	0.0041891	0.132344	MT-CO2	MT	7586	8269	+	684	protein_coding	mitochondrially encoded cytochrome c oxidase II [Source:HGNC Symbol;Acc:HGNC:7421]	-	213803	116279	18035.7	8301.15
ENSG00000175061	1.19117	2.28337	0.00421859	0.133095	LRRC75A-AS1	17	16438822	16478678	+	3759	processed_transcript	LRRC75A antisense RNA 1 [Source:HGNC Symbol;Acc:HGNC:28619]	-	13034	7086	200.069	92.0496
ENSG00000147684	1.19289	2.28611	0.0042542	0.133943	NDUFB9	8	124539101	124580648	+	4106	protein_coding	NADH:ubiquinone oxidoreductase subunit B9 [Source:HGNC Symbol;Acc:HGNC:7704]	-	4617	2507	64.8807	29.8146
ENSG00000177854	-1.40802	2.65372	0.00425849	0.133943	TMEM187	X	153972327	153983195	+	1924	protein_coding	transmembrane protein 187 [Source:HGNC Symbol;Acc:HGNC:13705]	-	40	132	1.19958	3.35013
ENSG00000100307	-1.29253	2.44957	0.00426702	0.133943	CBX7	22	39120167	39152674	-	7461	protein_coding	chromobox 7 [Source:HGNC Symbol;Acc:HGNC:1557]	-	93	283	0.719218	1.85218
ENSG00000122026	1.18951	2.28075	0.00426854	0.133943	RPL21	13	27251309	27256691	+	2249	protein_coding	ribosomal protein L21 [Source:HGNC Symbol;Acc:HGNC:10313]	-	13539	7369	347.354	159.997
ENSG00000171863	1.18873	2.27952	0.00429468	0.134582	RPS7	2	3575205	3580920	+	5584	protein_coding	ribosomal protein S7 [Source:HGNC Symbol;Acc:HGNC:10440]	-	13091	7129	135.27	62.3413
ENSG00000124875	-1.21251	2.3174	0.00430573	0.134747	CXCL6	4	73836497	73849064	+	2183	protein_coding	C-X-C motif chemokine ligand 6 [Source:HGNC Symbol;Acc:HGNC:10643]	-	391	1125	10.3347	25.1647
ENSG00000106976	-1.29173	2.44822	0.00433573	0.135418	DNM1	9	128191655	128255248	+	10775	protein_coding	dynamin 1 [Source:HGNC Symbol;Acc:HGNC:2972]	-	97	295	0.519433	1.3369
ENSG00000260260	1.31044	2.48017	0.00433882	0.135418	SNHG19	16	2154797	2155358	-	342	lincRNA	small nucleolar RNA host gene 19 [Source:HGNC Symbol;Acc:HGNC:49574]	-	158	79	26.6567	11.2796
ENSG00000185269	-2.64369	6.24928	0.00436855	0.135617	NOTUM	17	81952507	81961840	-	3019	protein_coding	notum, palmitoleoyl-protein carboxylesterase [Source:HGNC Symbol;Acc:HGNC:27106]	-	3	24	0.0573367	0.388187
ENSG00000228060	2.28056	4.85866	0.00436855	0.135617	AL365277.1	1	39565067	39573203	+	736	antisense	uncharacterized LOC101929516 [Source:NCBI gene;Acc:101929516]	-	20	5	1.56793	0.33173
ENSG00000261468	2.28056	4.85866	0.00436855	0.135617	AC096921.2	3	30697661	30699576	+	1916	sense_overlapping	novel transcript, overlapping to TGFBR2	-	20	5	0.602295	0.127429
ENSG00000270705	2.28056	4.85866	0.00436855	0.135617	AL161669.2	14	103207748	103207789	+	42	processed_pseudogene	collagen, type IV, alpha 1 (COL4A1) pseudogene	-	20	5	27.4761	5.81318
ENSG00000100665	-1.19847	2.29496	0.00440842	0.136673	SERPINA4	14	94561091	94569913	+	2338	protein_coding	serpin family A member 4 [Source:HGNC Symbol;Acc:HGNC:8948]	-	630	1795	15.5479	37.4898
ENSG00000074527	-1.32097	2.49833	0.00443745	0.13739	NTN4	12	95657807	95791152	-	4166	protein_coding	netrin 4 [Source:HGNC Symbol;Acc:HGNC:13658]	-	67	208	0.927963	2.43802
ENSG00000227906	-1.28841	2.44259	0.00445551	0.137765	SNAP25-AS1	20	10021978	10368776	-	5440	antisense	SNAP25 antisense RNA 1 [Source:HGNC Symbol;Acc:HGNC:44312]	-	87	264	0.922774	2.36972
ENSG00000143153	-1.18402	2.27208	0.00446561	0.137894	ATP1B1	1	169105697	169132722	+	2962	protein_coding	ATPase Na+/K+ transporting subunit beta 1 [Source:HGNC Symbol;Acc:HGNC:804]	-	4475	12622	87.1732	208.083
ENSG00000177989	-1.21549	2.32219	0.00448461	0.138152	ODF3B	22	50529710	50532580	-	2301	protein_coding	outer dense fiber of sperm tails 3B [Source:HGNC Symbol;Acc:HGNC:34388]	-	300	865	7.5228	18.3566
ENSG00000075223	1.92665	3.80173	0.00449772	0.138152	SEMA3C	7	80742538	80922359	-	6268	protein_coding	semaphorin 3C [Source:HGNC Symbol;Acc:HGNC:10725]	-	34	11	0.312986	0.0856952
ENSG00000043591	1.80262	3.48853	0.00449772	0.138152	ADRB1	10	114044056	114046908	+	2853	protein_coding	adrenoceptor beta 1 [Source:HGNC Symbol;Acc:HGNC:285]	-	34	12	0.687626	0.205387
ENSG00000205702	1.92665	3.80173	0.00449772	0.138152	CYP2D7	22	42140203	42144577	-	2260	polymorphic_pseudogene	cytochrome P450 family 2 subfamily D member 7 (gene/pseudogene) [Source:HGNC Symbol;Acc:HGNC:2624]	-	34	11	0.868051	0.237672
ENSG00000102879	1.37988	2.60246	0.00451338	0.13845	CORO1A	16	30182827	30189076	+	4871	protein_coding	coronin 1A [Source:HGNC Symbol;Acc:HGNC:2252]	-	105	50	1.24379	0.501239
ENSG00000164440	-1.63545	3.10684	0.00452276	0.138477	TXLNB	6	139240061	139292139	-	4937	protein_coding	taxilin beta [Source:HGNC Symbol;Acc:HGNC:21617]	-	16	62	0.186996	0.613227
ENSG00000005100	1.19697	2.29258	0.00452618	0.138477	DHX33	17	5440912	5469060	-	5872	protein_coding	DEAH-box helicase 33 [Source:HGNC Symbol;Acc:HGNC:16718]	-	1352	732	13.2851	6.0872
ENSG00000018869	1.34448	2.53939	0.00455301	0.139115	ZNF582	19	56375846	56393545	-	3350	protein_coding	zinc finger protein 582 [Source:HGNC Symbol;Acc:HGNC:26421]	zf-C2H2	127	62	2.18743	0.903732
ENSG00000163638	1.21517	2.32169	0.00461325	0.14055	ADAMTS9	3	64515654	64688000	-	10680	protein_coding	ADAM metallopeptidase with thrombospondin type 1 motif 9 [Source:HGNC Symbol;Acc:HGNC:13202]	-	550	294	2.97144	1.34422
ENSG00000181284	-1.39706	2.63364	0.00462046	0.14055	TMEM102	17	7435443	7437679	+	2129	protein_coding	transmembrane protein 102 [Source:HGNC Symbol;Acc:HGNC:26722]	-	40	131	1.08407	3.00461
ENSG00000267586	-2.24783	4.74968	0.00462106	0.14055	LINC00907	18	42159283	42691422	+	9813	lincRNA	long intergenic non-protein coding RNA 907 [Source:HGNC Symbol;Acc:HGNC:44327]	-	5	30	0.0293997	0.149284
ENSG00000130066	1.18245	2.26961	0.00462416	0.14055	SAT1	X	23783173	23786226	+	2498	protein_coding	spermidine/spermine N1-acetyltransferase 1 [Source:HGNC Symbol;Acc:HGNC:10540]	-	3803	2080	87.8433	40.6597
ENSG00000006210	-1.18269	2.26999	0.00467321	0.141856	CX3CL1	16	57372458	57385048	+	5983	protein_coding	C-X3-C motif chemokine ligand 1 [Source:HGNC Symbol;Acc:HGNC:10647]	-	1363	3841	13.1447	31.3486
ENSG00000143674	1.34348	2.53762	0.00472736	0.143223	MAP3K21	1	233327768	233385148	+	7916	protein_coding	mitogen-activated protein kinase kinase kinase 21 [Source:HGNC Symbol;Acc:HGNC:29798]	-	131	64	0.954862	0.394791
ENSG00000128917	-1.32317	2.50215	0.0047322	0.143223	DLL4	15	40929333	40939073	+	4761	protein_coding	delta like canonical Notch ligand 4 [Source:HGNC Symbol;Acc:HGNC:2910]	-	64	199	0.775634	2.04102
ENSG00000116117	-1.26737	2.40723	0.00473674	0.143223	PARD3B	2	204545793	205620162	+	10382	protein_coding	par-3 family cell polarity regulator beta [Source:HGNC Symbol;Acc:HGNC:14446]	-	102	305	0.566884	1.43454
ENSG00000262655	-1.68017	3.20466	0.00475756	0.143666	SPON1	11	13962689	14267884	+	5102	protein_coding	spondin 1 [Source:HGNC Symbol;Acc:HGNC:11252]	-	14	56	0.15833	0.53597
ENSG00000197961	1.21134	2.31552	0.00477406	0.143815	ZNF121	19	9560353	9584533	-	7251	protein_coding	zinc finger protein 121 [Source:HGNC Symbol;Acc:HGNC:12904]	zf-C2H2	556	298	4.42437	2.00683
ENSG00000012822	-1.20711	2.30875	0.00477486	0.143815	CALCOCO1	12	53708517	53727745	-	8898	protein_coding	calcium binding and coiled-coil domain 1 [Source:HGNC Symbol;Acc:HGNC:29306]	-	285	817	1.84811	4.48356
ENSG00000187688	-1.40328	2.64502	0.00479358	0.144192	TRPV2	17	16415542	16437003	+	3410	protein_coding	transient receptor potential cation channel subfamily V member 2 [Source:HGNC Symbol;Acc:HGNC:18082]	-	38	125	0.64299	1.78998
ENSG00000138772	-1.18507	2.27375	0.0048447	0.145111	ANXA3	4	78551519	78610451	+	5123	protein_coding	annexin A3 [Source:HGNC Symbol;Acc:HGNC:541]	-	745	2103	8.39087	20.0451
ENSG00000154556	-1.31948	2.49576	0.0048469	0.145111	SORBS2	4	185585444	185956652	-	17161	protein_coding	sorbin and SH3 domain containing 2 [Source:HGNC Symbol;Acc:HGNC:24098]	-	59	183	0.198374	0.520717
ENSG00000126460	2.35975	5.13281	0.00484911	0.145111	PRRG2	19	49580646	49591015	+	1701	protein_coding	proline rich and Gla domain 2 [Source:HGNC Symbol;Acc:HGNC:9470]	-	17	4	0.57666	0.114828
ENSG00000175318	2.35975	5.13281	0.00484911	0.145111	GRAMD2A	15	72159807	72197785	-	4987	protein_coding	GRAM domain containing 2A [Source:HGNC Symbol;Acc:HGNC:27287]	-	17	4	0.196691	0.0391664
ENSG00000165996	1.38562	2.61284	0.00498578	0.149009	HACD1	10	17589032	17617377	-	3857	protein_coding	3-hydroxyacyl-CoA dehydratase 1 [Source:HGNC Symbol;Acc:HGNC:9639]	-	97	46	1.4511	0.582373
ENSG00000258317	1.69566	3.23924	0.00501982	0.149662	AC034102.6	12	56120033	56129619	-	1294	antisense	novel transcript, antisense to ZC3H10 and ESYT1	-	42	16	1.87279	0.60378
ENSG00000128298	1.23512	2.354	0.00502519	0.149662	BAIAP2L2	22	38084889	38110670	-	2146	protein_coding	BAI1 associated protein 2 like 2 [Source:HGNC Symbol;Acc:HGNC:26203]	-	332	175	8.92654	3.982
ENSG00000227755	-1.35568	2.55918	0.00503326	0.149662	AP000344.1	22	23446598	23460833	+	795	transcribed_processed_pseudogene	MAD1 mitotic arrest deficient-like 1 (yeast)(MAD1L1) pseudogene	-	44	140	3.19345	8.59912
ENSG00000185201	-1.45019	2.73245	0.00503336	0.149662	IFITM2	11	307631	315272	+	1543	protein_coding	interferon induced transmembrane protein 2 [Source:HGNC Symbol;Acc:HGNC:5413]	-	30	102	1.12184	3.22795
ENSG00000151892	-1.34076	2.53284	0.00506352	0.150367	GFRA1	10	116056925	116273467	-	9678	protein_coding	GDNF family receptor alpha 1 [Source:HGNC Symbol;Acc:HGNC:4243]	-	54	170	0.321946	0.857741
ENSG00000113140	-1.16652	2.24469	0.00512501	0.15113	SPARC	5	151661096	151687165	-	4831	protein_coding	secreted protein acidic and cysteine rich [Source:HGNC Symbol;Acc:HGNC:11219]	-	2727	7599	32.5704	76.809
ENSG00000119922	-1.88292	3.68821	0.00512978	0.15113	IFIT2	10	89283694	89309276	+	4101	protein_coding	interferon induced protein with tetratricopeptide repeats 2 [Source:HGNC Symbol;Acc:HGNC:5409]	-	8	37	0.112558	0.44056
ENSG00000005243	-1.92125	3.78752	0.00512978	0.15113	COPZ2	17	48026167	48038030	-	1851	protein_coding	coatomer protein complex subunit zeta 2 [Source:HGNC Symbol;Acc:HGNC:19356]	-	8	38	0.249378	1.00247
ENSG00000240694	-1.21613	2.32322	0.00514923	0.15113	PNMA2	8	26504686	26514092	-	5579	protein_coding	PNMA family member 2 [Source:HGNC Symbol;Acc:HGNC:9159]	-	174	502	1.79957	4.3938
ENSG00000256043	-1.26676	2.4062	0.00516363	0.15113	CTSO	4	155924118	155953917	-	2954	protein_coding	cathepsin O [Source:HGNC Symbol;Acc:HGNC:2542]	-	92	275	1.79702	4.54585
ENSG00000169019	1.1833	2.27095	0.00517296	0.15113	COMMD8	4	47450796	47463719	-	1766	protein_coding	COMM domain containing 8 [Source:HGNC Symbol;Acc:HGNC:26036]	-	913	499	29.8301	13.7976
ENSG00000106688	-1.21025	2.31378	0.00518771	0.15113	SLC1A1	9	4490444	4587469	+	3998	protein_coding	solute carrier family 1 member 1 [Source:HGNC Symbol;Acc:HGNC:10939]	-	205	589	2.9586	7.19392
ENSG00000188042	-1.22666	2.34025	0.00524117	0.15113	ARL4C	2	234493041	234497053	-	4013	protein_coding	ADP ribosylation factor like GTPase 4C [Source:HGNC Symbol;Acc:HGNC:698]	-	139	404	1.99858	4.91592
ENSG00000197888	-2.70893	6.53835	0.0052473	0.15113	UGT2B17	4	68537184	68568527	-	2077	protein_coding	UDP glucuronosyltransferase family 2 member B17 [Source:HGNC Symbol;Acc:HGNC:12547]	-	2	17	0.0555608	0.399673
ENSG00000179168	-2.79074	6.91985	0.0052473	0.15113	GGN	19	38384265	38388082	-	2447	protein_coding	gametogenetin [Source:HGNC Symbol;Acc:HGNC:18869]	-	2	18	0.0471597	0.359196
ENSG00000197815	2.57947	5.97718	0.0052473	0.15113	AC122129.1	17	17858227	17860041	+	1815	antisense	novel transcript, antisense to TOM1L2	-	15	3	0.476859	0.0807119
ENSG00000241962	2.57947	5.97718	0.0052473	0.15113	AC079447.1	2	99141485	99322741	+	1993	protein_coding	novel protein, C2orf15-MRPL30-novel lincRNA readthrough	-	15	3	0.434269	0.0735033
ENSG00000256973	3.13295	8.77227	0.0052473	0.15113	AC053513.1	12	22460519	22463914	-	738	lincRNA	novel transcript	-	15	2	1.17276	0.132332
ENSG00000270469	-2.70893	6.53835	0.0052473	0.15113	AC006557.5	18	14053951	14054761	+	811	processed_pseudogene	non-SMC element 4 homolog A (S. cerevisiae), pseudogene	-	2	17	0.142293	1.02358
ENSG00000256678	-2.70893	6.53835	0.0052473	0.15113	AC025423.3	12	68805011	68805479	-	469	processed_pseudogene	chromosome 1 open reading frame 144 (C1orf144) pseudogene	-	2	17	0.246055	1.76998
ENSG00000254542	-2.79074	6.91985	0.0052473	0.15113	NAV2-AS3	11	19978699	19981337	-	598	antisense	NAV2 antisense RNA 3 [Source:HGNC Symbol;Acc:HGNC:40742]	-	2	18	0.192976	1.46982
ENSG00000163131	-1.21284	2.31794	0.00525324	0.15113	CTSS	1	150730196	150765957	-	4228	protein_coding	cathepsin S [Source:HGNC Symbol;Acc:HGNC:2545]	-	181	521	2.47012	6.01722
ENSG00000109181	-3.35705	10.2464	0.00528154	0.15113	UGT2B10	4	68815993	68831196	+	1931	protein_coding	UDP glucuronosyltransferase family 2 member B10 [Source:HGNC Symbol;Acc:HGNC:12544]	-	1	14	0.0298808	0.354029
ENSG00000182771	-3.35705	10.2464	0.00528154	0.15113	GRID1	10	85599555	86366493	-	5927	protein_coding	glutamate ionotropic receptor delta type subunit 1 [Source:HGNC Symbol;Acc:HGNC:4575]	-	1	14	0.00973509	0.115342
ENSG00000174326	-3.35705	10.2464	0.00528154	0.15113	SLC16A11	17	7041630	7043923	-	2041	protein_coding	solute carrier family 16 member 11 [Source:HGNC Symbol;Acc:HGNC:23093]	-	1	14	0.0282704	0.334948
ENSG00000279494	3.72317	13.2064	0.00528154	0.15113	AL117328.2	22	49851425	49853364	+	1940	lincRNA	novel transcript	-	12	1	0.356906	0.0251705
ENSG00000283971	-3.35705	10.2464	0.00528154	0.15113	MIR4442	3	25664873	25664939	-	67	miRNA	microRNA 4442 [Source:HGNC Symbol;Acc:HGNC:41718]	-	1	14	0.861192	10.2034
ENSG00000135638	-3.35705	10.2464	0.00528154	0.15113	EMX1	2	72916260	72936071	+	5516	protein_coding	empty spiracles homeobox 1 [Source:HGNC Symbol;Acc:HGNC:3340]	Homeobox	1	14	0.0104605	0.123936
ENSG00000168126	3.72317	13.2064	0.00528154	0.15113	OR2W6P	6	27937465	27938403	+	939	unprocessed_pseudogene	olfactory receptor family 2 subfamily W member 6 pseudogene [Source:HGNC Symbol;Acc:HGNC:15072]	-	12	1	0.737379	0.0520029
ENSG00000239494	3.72317	13.2064	0.00528154	0.15113	RN7SL333P	1	169859756	169860052	+	297	misc_RNA	RNA, 7SL, cytoplasmic 333, pseudogene [Source:HGNC Symbol;Acc:HGNC:46349]	-	12	1	2.33131	0.164413
ENSG00000070729	-3.35705	10.2464	0.00528154	0.15113	CNGB1	16	57882340	57971116	-	7298	protein_coding	cyclic nucleotide gated channel beta 1 [Source:HGNC Symbol;Acc:HGNC:2151]	-	1	14	0.00790626	0.0936736
ENSG00000164744	3.72317	13.2064	0.00528154	0.15113	SUN3	7	47987148	48029119	-	1732	protein_coding	Sad1 and UNC84 domain containing 3 [Source:HGNC Symbol;Acc:HGNC:22429]	-	12	1	0.399768	0.0281932
ENSG00000260467	3.72317	13.2064	0.00528154	0.15113	AC018552.2	16	57681124	57701730	-	804	antisense	novel transcript, antisense to CCDC135 and GPR97	-	12	1	0.861192	0.0607347
ENSG00000199620	-3.35705	10.2464	0.00528154	0.15113	RNA5SP258	8	26136880	26136998	+	119	rRNA_pseudogene	RNA, 5S ribosomal pseudogene 258 [Source:HGNC Symbol;Acc:HGNC:43158]	-	1	14	0.484873	5.74479
ENSG00000175352	2.1608	4.47161	0.00528628	0.15113	NRIP3	11	8980576	9004049	-	4123	protein_coding	nuclear receptor interacting protein 3 [Source:HGNC Symbol;Acc:HGNC:1167]	-	22	6	0.307882	0.0710609
ENSG00000218350	1.9938	3.98286	0.00529072	0.15113	LYPLA1P3	6	71165076	71165770	+	695	processed_pseudogene	lysophospholipase I pseudogene 3 [Source:HGNC Symbol;Acc:HGNC:44007]	-	26	8	2.15856	0.56208
ENSG00000270372	1.70419	3.25845	0.00530838	0.151448	AL162413.1	9	10948372	10948481	-	110	lincRNA	novel transcript	-	37	14	19.4081	6.21482
ENSG00000065717	-1.20715	2.3088	0.00534439	0.152289	TLE2	19	2997638	3047635	-	4038	protein_coding	transducin like enhancer of split 2 [Source:HGNC Symbol;Acc:HGNC:11838]	-	203	582	2.90071	7.038
ENSG00000220749	1.42104	2.67779	0.00542659	0.154308	RPL21P28	1	212051524	212052006	-	483	processed_pseudogene	ribosomal protein L21 pseudogene 28 [Source:HGNC Symbol;Acc:HGNC:36258]	-	80	37	9.55692	3.74065
ENSG00000174938	-1.15966	2.23405	0.00542852	0.154308	SEZ6L2	16	29871159	29899547	-	4110	protein_coding	seizure related 6 homolog like 2 [Source:HGNC Symbol;Acc:HGNC:30844]	-	2074	5752	29.1167	68.3392
ENSG00000162004	1.52087	2.86965	0.00544357	0.154358	CCDC78	16	722582	726954	-	4147	protein_coding	coiled-coil domain containing 78 [Source:HGNC Symbol;Acc:HGNC:14153]	-	58	25	0.806991	0.294374
ENSG00000196167	1.52087	2.86965	0.00544357	0.154358	COLCA1	11	111290787	111305045	-	8733	antisense	colorectal cancer associated 1 [Source:HGNC Symbol;Acc:HGNC:33789]	-	58	25	0.383212	0.139788
ENSG00000086570	-1.43721	2.70796	0.00555752	0.157398	FAT2	5	151504093	151568944	-	14537	protein_coding	FAT atypical cadherin 2 [Source:HGNC Symbol;Acc:HGNC:3596]	-	27	91	0.107168	0.305675
ENSG00000060138	1.16192	2.23755	0.00559952	0.158394	YBX3	12	10699089	10723312	-	8610	protein_coding	Y-box binding protein 3 [Source:HGNC Symbol;Acc:HGNC:2428]	CSD	1799	998	12.056	5.66005
ENSG00000217241	1.88373	3.69028	0.00561466	0.158629	CBX3P9	6	116453014	116453565	-	552	processed_pseudogene	chromobox 3 pseudogene 9 [Source:HGNC Symbol;Acc:HGNC:42881]	-	33	11	3.44945	0.973075
ENSG00000203667	1.62639	3.08739	0.00563919	0.158744	COX20	1	244835322	244845057	+	4864	protein_coding	cytochrome c oxidase assembly factor COX20 [Source:HGNC Symbol;Acc:HGNC:26970]	-	45	18	0.533819	0.180706
ENSG00000188825	-1.65424	3.14757	0.00563919	0.158744	LINC00910	17	43369845	43389199	-	6895	lincRNA	long intergenic non-protein coding RNA 910 [Source:HGNC Symbol;Acc:HGNC:44361]	-	14	55	0.117157	0.389512
ENSG00000260051	1.62639	3.08739	0.00563919	0.158744	AL031600.1	16	1451760	1452653	+	570	antisense	novel transcript, antisense to CLCN7	-	45	18	4.55525	1.54202
ENSG00000161249	-1.29358	2.45135	0.00565817	0.159086	DMKN	19	35497220	35513658	-	7444	protein_coding	dermokine [Source:HGNC Symbol;Acc:HGNC:25063]	-	65	198	0.503828	1.29883
ENSG00000235776	1.68132	3.20721	0.0056822	0.159184	AC000089.1	22	19792294	19793094	+	801	processed_pseudogene	ribosomal protein L7a (RPL7A) pseudogene	-	39	15	2.80936	0.914432
ENSG00000232546	1.68132	3.20721	0.0056822	0.159184	AC027644.1	7	66848496	66858136	+	298	unprocessed_pseudogene	pseudogene similar to part of general transcription factor II, i (GTF2I)	-	39	15	7.55133	2.45792
ENSG00000272034	1.68132	3.20721	0.0056822	0.159184	SNORD14A	11	17074654	17074744	-	91	snoRNA	small nucleolar RNA, C/D box 14A [Source:HGNC Symbol;Acc:HGNC:10113]	-	39	15	24.7285	8.04902
ENSG00000264577	1.27704	2.42342	0.00569712	0.15941	AC010761.1	17	28721487	28722877	-	899	antisense	novel transcript, antisense to RPL23A	-	170	87	10.911	4.72555
ENSG00000115414	-1.14765	2.21553	0.00573951	0.160403	FN1	2	215360440	215436172	-	17315	protein_coding	fibronectin 1 [Source:HGNC Symbol;Acc:HGNC:3778]	-	31445	86484	104.786	243.897
ENSG00000173846	1.23634	2.356	0.00575037	0.160478	PLK3	1	44800225	44805990	+	3479	protein_coding	polo like kinase 3 [Source:HGNC Symbol;Acc:HGNC:2154]	-	226	119	3.74825	1.67027
ENSG00000169710	1.14773	2.21565	0.00576129	0.160478	FASN	17	82078333	82098332	-	9364	protein_coding	fatty acid synthase [Source:HGNC Symbol;Acc:HGNC:3594]	-	21734	12177	133.922	63.4997
ENSG00000095383	-1.22261	2.33369	0.00576293	0.160478	TBC1D2	9	98198999	98255721	-	3681	protein_coding	TBC1 domain family member 2 [Source:HGNC Symbol;Acc:HGNC:18026]	-	128	371	2.00641	4.92154
ENSG00000105767	-1.18283	2.27022	0.00577983	0.160757	CADM4	19	43622368	43639839	-	2246	protein_coding	cell adhesion molecule 4 [Source:HGNC Symbol;Acc:HGNC:30825]	-	254	716	6.52528	15.5667
ENSG00000170222	1.31008	2.47956	0.0057873	0.160772	ADPRM	17	10697594	10711233	+	1620	protein_coding	ADP-ribose/CDP-alcohol diphosphatase, manganese dependent [Source:HGNC Symbol;Acc:HGNC:30925]	-	128	64	4.559	1.92911
ENSG00000149131	-1.15059	2.22004	0.00581494	0.161347	SERPING1	11	57597387	57614853	+	3603	protein_coding	serpin family G member 1 [Source:HGNC Symbol;Acc:HGNC:1228]	-	1873	5162	29.995	69.9595
ENSG00000197958	1.14533	2.21197	0.00586448	0.162528	RPL12	9	127447674	127451405	-	2452	protein_coding	ribosomal protein L12 [Source:HGNC Symbol;Acc:HGNC:10302]	-	20039	11246	471.553	223.96
ENSG00000099834	-1.17638	2.26009	0.00589043	0.163053	CDHR5	11	616565	626078	-	3873	protein_coding	cadherin related family member 5 [Source:HGNC Symbol;Acc:HGNC:7521]	-	289	811	4.30552	10.2251
ENSG00000101306	1.93308	3.81871	0.00591186	0.163451	MYLK2	20	31819308	31834689	+	2976	protein_coding	myosin light chain kinase 2 [Source:HGNC Symbol;Acc:HGNC:16243]	-	28	9	0.542875	0.147673
ENSG00000039068	-1.14882	2.21733	0.00598056	0.165154	CDH1	16	68737225	68835548	+	6177	protein_coding	cadherin 1 [Source:HGNC Symbol;Acc:HGNC:1748]	-	1310	3606	12.2368	28.5063
ENSG00000108561	1.14295	2.20831	0.00603436	0.16593	C1QBP	17	5432777	5448830	-	2335	protein_coding	complement C1q binding protein [Source:HGNC Symbol;Acc:HGNC:1243]	-	7589	4266	187.531	89.2127
ENSG00000198691	-1.73759	3.33478	0.00603582	0.16593	ABCA4	1	93992835	94121132	-	8530	protein_coding	ATP binding cassette subfamily A member 4 [Source:HGNC Symbol;Acc:HGNC:34]	-	12	50	0.0811722	0.286229
ENSG00000101132	1.15324	2.22412	0.00603865	0.16593	PFDN4	20	54207847	54228052	+	1975	protein_coding	prefoldin subunit 4 [Source:HGNC Symbol;Acc:HGNC:8868]	-	1618	903	47.2701	22.3261
ENSG00000135899	-1.31587	2.48953	0.00604702	0.16593	SP110	2	230167293	230225729	-	6865	protein_coding	SP110 nuclear body protein [Source:HGNC Symbol;Acc:HGNC:5401]	SAND	53	164	0.445462	1.16653
ENSG00000162757	1.35468	2.55741	0.00606405	0.16593	C1orf74	1	209779208	209784559	-	4684	protein_coding	chromosome 1 open reading frame 74 [Source:HGNC Symbol;Acc:HGNC:26319]	-	97	47	1.1949	0.489975
ENSG00000006283	-1.74719	3.35704	0.00606867	0.16593	CACNA1G	17	50561068	50627474	+	9709	protein_coding	calcium voltage-gated channel subunit alpha1 G [Source:HGNC Symbol;Acc:HGNC:1394]	-	10	42	0.0594293	0.211236
ENSG00000135298	2.20698	4.61708	0.00607288	0.16593	ADGRB3	6	68635367	69389511	+	6490	protein_coding	adhesion G protein-coupled receptor B3 [Source:HGNC Symbol;Acc:HGNC:945]	-	19	5	0.168921	0.0376199
ENSG00000180834	2.20698	4.61708	0.00607288	0.16593	MAP6D1	3	183815876	183825594	-	2408	protein_coding	MAP6 domain containing 1 [Source:HGNC Symbol;Acc:HGNC:25753]	-	19	5	0.455273	0.101393
ENSG00000232344	-2.58265	5.99038	0.00607288	0.16593	AC087163.2	17	18010643	18011822	+	853	processed_pseudogene	ribosomal protein S2 (RPS2) pseudogene	-	3	23	0.20293	1.31665
ENSG00000112293	-1.20774	2.30976	0.00612697	0.167036	GPLD1	6	24424565	24495205	-	4919	protein_coding	glycosylphosphatidylinositol specific phospholipase D1 [Source:HGNC Symbol;Acc:HGNC:4459]	-	137	393	1.60701	3.90129
ENSG00000210077	2.06798	4.193	0.00612771	0.167036	MT-TV	MT	1602	1670	+	69	Mt_tRNA	mitochondrially encoded tRNA valine [Source:HGNC Symbol;Acc:HGNC:7500]	-	24	7	20.0695	4.95384
ENSG00000165238	1.14596	2.21293	0.00618545	0.168412	WNK2	9	93184916	93320572	+	13198	protein_coding	WNK lysine deficient protein kinase 2 [Source:HGNC Symbol;Acc:HGNC:14542]	-	2150	1206	9.39951	4.46203
ENSG00000277561	-1.32563	2.50643	0.00622582	0.169313	GOLGA8IP	15	22606022	22617854	-	4116	transcribed_unprocessed_pseudogene	golgin A8 family member I, pseudogene [Source:HGNC Symbol;Acc:HGNC:26660]	-	43	134	0.602793	1.58973
ENSG00000259959	1.47193	2.77393	0.00624646	0.169676	AC107068.1	4	47840122	47844339	-	4218	lincRNA	novel transcript	-	65	29	0.889164	0.335725
ENSG00000114019	-1.13872	2.20186	0.00628211	0.170445	AMOTL2	3	134355874	134375479	-	5984	protein_coding	angiomotin like 2 [Source:HGNC Symbol;Acc:HGNC:17812]	-	2367	6470	22.8235	52.7966
ENSG00000120129	-1.14066	2.20481	0.00629559	0.170612	DUSP1	5	172768090	172771195	-	2019	protein_coding	dual specificity phosphatase 1 [Source:HGNC Symbol;Acc:HGNC:3064]	-	1514	4144	43.2678	100.225
ENSG00000090402	1.32282	2.50155	0.00632904	0.171319	SI	3	164978898	165078495	-	6138	protein_coding	sucrase-isomaltase [Source:HGNC Symbol;Acc:HGNC:10856]	-	111	55	1.04345	0.437551
ENSG00000244560	1.64278	3.12267	0.00637015	0.172231	AC004890.2	7	149285281	149297312	+	4288	transcribed_unprocessed_pseudogene	AI894139 pseudogene [Source:NCBI gene;Acc:155060]	-	43	17	0.578614	0.193592
ENSG00000255717	1.13933	2.20279	0.00637914	0.172274	SNHG1	11	62851988	62855914	-	3756	processed_transcript	small nucleolar RNA host gene 1 [Source:HGNC Symbol;Acc:HGNC:32688]	-	2873	1619	44.1352	21.0482
ENSG00000197568	-1.22185	2.33246	0.00640726	0.172832	HHLA3	1	70354805	70385339	+	1222	protein_coding	HERV-H LTR-associating 3 [Source:HGNC Symbol;Acc:HGNC:4906]	-	107	310	5.05228	12.3875
ENSG00000198938	1.13169	2.19115	0.00642427	0.173091	MT-CO3	MT	9207	9990	+	784	protein_coding	mitochondrially encoded cytochrome c oxidase III [Source:HGNC Symbol;Acc:HGNC:7422]	-	214897	121748	15815.7	7582.96
ENSG00000080293	-1.5308	2.88946	0.00646921	0.173937	SCTR	2	119439843	119525301	-	3426	protein_coding	secretin receptor [Source:HGNC Symbol;Acc:HGNC:10608]	-	20	72	0.336835	1.02621
ENSG00000181350	1.88242	3.68694	0.00648527	0.173937	LRRC75A	17	16441577	16492153	-	3695	protein_coding	leucine rich repeat containing 75A [Source:HGNC Symbol;Acc:HGNC:32403]	-	30	10	0.46847	0.132153
ENSG00000169740	1.66478	3.17065	0.00649311	0.173937	ZNF32	10	43643859	43648856	-	1436	protein_coding	zinc finger protein 32 [Source:HGNC Symbol;Acc:HGNC:13095]	zf-C2H2	36	14	1.44652	0.476065
ENSG00000179598	1.66478	3.17065	0.00649311	0.173937	PLD6	17	17200995	17206315	-	2560	protein_coding	phospholipase D family member 6 [Source:HGNC Symbol;Acc:HGNC:30447]	-	36	14	0.811405	0.267043
ENSG00000183054	1.66478	3.17065	0.00649311	0.173937	RGPD6	2	110513812	110577185	-	13309	protein_coding	RANBP2-like and GRIP domain containing 6 [Source:HGNC Symbol;Acc:HGNC:32419]	-	36	14	0.156075	0.051366
ENSG00000162851	1.15243	2.22289	0.00657139	0.175832	TFB2M	1	246540560	246566324	-	1848	protein_coding	transcription factor B2, mitochondrial [Source:HGNC Symbol;Acc:HGNC:18559]	-	908	507	28.3504	13.3967
ENSG00000172428	1.15397	2.22526	0.00666849	0.177848	COPS9	2	240126563	240136807	-	2039	protein_coding	COP9 signalosome subunit 9 [Source:HGNC Symbol;Acc:HGNC:21314]	-	805	449	22.78	10.7528
ENSG00000053501	1.16728	2.24588	0.00667629	0.177848	USE1	19	17215346	17219829	+	2431	protein_coding	unconventional SNARE in the ER 1 [Source:HGNC Symbol;Acc:HGNC:30882]	-	485	268	11.5115	5.38323
ENSG00000148655	-1.41158	2.66028	0.0066801	0.177848	LRMDA	10	75431453	76560167	+	6560	protein_coding	leucine rich melanocyte differentiation associated [Source:HGNC Symbol;Acc:HGNC:23405]	-	29	96	0.255076	0.714595
ENSG00000223891	-1.21995	2.32939	0.00668498	0.177848	OSER1-DT	20	44210960	44226027	+	2186	lincRNA	OSER1 divergent transcript [Source:HGNC Symbol;Acc:HGNC:48585]	-	94	272	2.48115	6.07591
ENSG00000115657	1.22196	2.33264	0.00668498	0.177848	ABCB6	2	219209766	219219017	-	5234	protein_coding	ATP binding cassette subfamily B member 6 (Langereis blood group) [Source:HGNC Symbol;Acc:HGNC:47]	-	220	117	2.42529	1.09155
ENSG00000119121	1.26908	2.41007	0.00669857	0.177955	TRPM6	9	74722495	74888094	-	9193	protein_coding	transient receptor potential cation channel subfamily M member 6 [Source:HGNC Symbol;Acc:HGNC:17995]	-	138	71	0.866157	0.377132
ENSG00000167434	-1.19358	2.2872	0.0067043	0.177955	CA4	17	60149936	60170899	+	2424	protein_coding	carbonic anhydrase 4 [Source:HGNC Symbol;Acc:HGNC:1375]	-	138	392	3.28489	7.89671
ENSG00000284753	1.19465	2.28889	0.00673578	0.178586	EEF1AKMT4	3	184249650	184259585	+	1823	protein_coding	EEF1A lysine methyltransferase 4 [Source:HGNC Symbol;Acc:HGNC:53611]	-	297	161	9.40036	4.31253
ENSG00000107829	-1.2048	2.30505	0.00675288	0.178836	FBXW4	10	101610664	101695295	-	5038	protein_coding	F-box and WD repeat domain containing 4 [Source:HGNC Symbol;Acc:HGNC:10847]	-	124	355	1.42016	3.44083
ENSG00000198015	1.13112	2.19028	0.00677499	0.179217	MRPL42	12	93467488	93516213	+	16393	protein_coding	mitochondrial ribosomal protein L42 [Source:HGNC Symbol;Acc:HGNC:14493]	-	2742	1554	9.65126	4.62898
ENSG00000224420	1.18652	2.27603	0.00678988	0.179407	ADM5	19	49688664	49690575	+	1718	protein_coding	adrenomedullin 5 (putative) [Source:HGNC Symbol;Acc:HGNC:27293]	-	332	181	11.1504	5.14456
ENSG00000115257	-1.2291	2.3442	0.00680589	0.179626	PCSK4	19	1481428	1490752	-	3792	protein_coding	proprotein convertase subtilisin/kexin type 4 [Source:HGNC Symbol;Acc:HGNC:8746]	-	91	265	1.38468	3.41248
ENSG00000058668	-1.1469	2.21438	0.00687115	0.181143	ATP2B4	1	203626561	203744081	+	9721	protein_coding	ATPase plasma membrane Ca2+ transporting 4 [Source:HGNC Symbol;Acc:HGNC:817]	-	375	1031	2.22585	5.17894
ENSG00000181104	-1.13833	2.20125	0.00688166	0.181215	F2R	5	76716043	76735781	+	4066	protein_coding	coagulation factor II thrombin receptor [Source:HGNC Symbol;Acc:HGNC:3537]	-	584	1596	8.28744	19.1672
ENSG00000072682	-1.13588	2.19752	0.00690116	0.181296	P4HA2	5	132191838	132295315	-	8502	protein_coding	prolyl 4-hydroxylase subunit alpha 2 [Source:HGNC Symbol;Acc:HGNC:8547]	-	688	1877	4.6692	10.7804
ENSG00000160181	-1.1401	2.20397	0.00691219	0.181296	TFF2	21	42346357	42351128	-	830	protein_coding	trefoil factor 2 [Source:HGNC Symbol;Acc:HGNC:11756]	-	546	1494	37.9568	87.8952
ENSG00000111845	1.14992	2.21901	0.0069455	0.181296	PAK1IP1	6	10694695	10709782	+	1800	protein_coding	PAK1 interacting protein 1 [Source:HGNC Symbol;Acc:HGNC:20882]	-	708	396	22.6953	10.7428
ENSG00000260083	2.27287	4.83284	0.00696616	0.181296	MIR762HG	16	30875222	30895220	+	1815	antisense	MIR762 host gene [Source:HGNC Symbol;Acc:HGNC:51386]	-	16	4	0.508649	0.107616
ENSG00000179603	2.27287	4.83284	0.00696616	0.181296	GRM8	7	126438598	127253294	-	6457	protein_coding	glutamate metabotropic receptor 8 [Source:HGNC Symbol;Acc:HGNC:4600]	-	16	4	0.142976	0.0302498
ENSG00000169752	2.27287	4.83284	0.00696616	0.181296	NRG4	15	75935969	76059795	-	5031	protein_coding	neuregulin 4 [Source:HGNC Symbol;Acc:HGNC:29862]	-	16	4	0.183502	0.0388238
ENSG00000196497	1.71545	3.28399	0.00701327	0.181296	IPO4	14	24180219	24188964	-	5007	protein_coding	importin 4 [Source:HGNC Symbol;Acc:HGNC:19426]	-	32	12	0.368763	0.11703
ENSG00000166016	1.22821	2.34276	0.00713676	0.181296	ABTB2	11	34150988	34358008	-	4973	protein_coding	ankyrin repeat and BTB domain containing 2 [Source:HGNC Symbol;Acc:HGNC:23842]	-	170	90	1.97245	0.883725
ENSG00000230306	-2.3002	4.92526	0.00716778	0.181296	BANF1P2	10	133344643	133344906	-	264	processed_pseudogene	barrier to autointegration factor 1 pseudogene 2 [Source:HGNC Symbol;Acc:HGNC:23426]	-	4	25	0.874241	4.62412
ENSG00000227201	-2.3002	4.92526	0.00716778	0.181296	CNN2P1	22	30046276	30047193	-	918	processed_pseudogene	calponin 2 pseudogene 1 [Source:HGNC Symbol;Acc:HGNC:39526]	-	4	25	0.251416	1.32981
ENSG00000189007	1.2154	2.32204	0.00723973	0.181296	ADAT2	6	143422832	143450673	-	7175	protein_coding	adenosine deaminase, tRNA specific 2 [Source:HGNC Symbol;Acc:HGNC:21172]	-	219	117	1.76115	0.796264
ENSG00000170153	-6.19421	73.2222	0.00724341	0.181296	RNF150	4	140859807	141212877	-	11007	protein_coding	ring finger protein 150 [Source:HGNC Symbol;Acc:HGNC:23138]	-	0	10	0	0.0443633
ENSG00000144857	-6.19421	73.2222	0.00724341	0.181296	BOC	3	113211003	113287459	+	10330	protein_coding	BOC cell adhesion associated, oncogene regulated [Source:HGNC Symbol;Acc:HGNC:17173]	-	0	10	0	0.0472708
ENSG00000139714	-6.19421	73.2222	0.00724341	0.181296	MORN3	12	121648742	121672631	-	3856	protein_coding	MORN repeat containing 3 [Source:HGNC Symbol;Acc:HGNC:29807]	-	0	10	0	0.126636
ENSG00000230910	6.18436	72.7242	0.00724341	0.181296	AL391807.1	6	68628117	68635161	-	5924	processed_transcript	uncharacterized LOC101928307 [Source:NCBI gene;Acc:101928307]	-	8	0	0.0779202	0
ENSG00000272702	-6.19421	73.2222	0.00724341	0.181296	AC010913.1	2	73113018	73115907	+	2890	processed_transcript	novel transcript	-	0	10	0	0.168964
ENSG00000235138	6.18436	72.7242	0.00724341	0.181296	AL445931.1	9	134054290	134058805	+	2112	antisense	uncharacterized LOC100130548 [Source:NCBI gene;Acc:100130548]	-	8	0	0.21856	0
ENSG00000179935	6.18436	72.7242	0.00724341	0.181296	LINC00652	20	18786065	18794335	-	3859	lincRNA	long intergenic non-protein coding RNA 652 [Source:HGNC Symbol;Acc:HGNC:25003]	-	8	0	0.119616	0
ENSG00000279641	-6.19421	73.2222	0.00724341	0.181296	AC120057.3	17	7242200	7243814	+	1615	TEC	TEC	-	0	10	0	0.302357
ENSG00000215241	-6.19421	73.2222	0.00724341	0.181296	LINC02449	12	8235415	8242564	+	1397	lincRNA	long intergenic non-protein coding RNA 2449 [Source:HGNC Symbol;Acc:HGNC:53381]	-	0	10	0	0.34954
ENSG00000266601	6.18436	72.7242	0.00724341	0.181296	AC018521.6	17	47929682	47933106	-	335	antisense	novel transcript, antisense to SP2	-	8	0	1.37791	0
ENSG00000255893	6.18436	72.7242	0.00724341	0.181296	AP000786.1	11	94472908	94473570	-	581	antisense	novel transcript	-	8	0	0.794491	0
ENSG00000227258	-6.19421	73.2222	0.00724341	0.181296	SMIM2-AS1	13	44110451	44240517	+	3009	antisense	SMIM2 antisense RNA 1 [Source:HGNC Symbol;Acc:HGNC:42674]	-	0	10	0	0.162282
ENSG00000254419	6.18436	72.7242	0.00724341	0.181296	AL139349.1	20	58710795	58711633	+	577	sense_intronic	novel transcript	-	8	0	0.799998	0
ENSG00000284954	6.18436	72.7242	0.00724341	0.181296	AL662884.3	6	32152802	32154365	-	1060	bidirectional_promoter_lncRNA	uncharacterized LOC100507547 [Source:NCBI gene;Acc:100507547]	-	8	0	0.435471	0
ENSG00000230417	-6.19421	73.2222	0.00724341	0.181296	LINC00856	10	78179185	78551355	+	9354	lincRNA	long intergenic non-protein coding RNA 856 [Source:HGNC Symbol;Acc:HGNC:45111]	-	0	10	0	0.052203
ENSG00000280184	6.18436	72.7242	0.00724341	0.181296	AL023806.3	6	145789270	145791973	-	2704	TEC	TEC	-	8	0	0.17071	0
ENSG00000100053	6.18436	72.7242	0.00724341	0.181296	CRYBB3	22	25199850	25207363	+	867	protein_coding	crystallin beta B3 [Source:HGNC Symbol;Acc:HGNC:2400]	-	8	0	0.53241	0
ENSG00000229659	-6.19421	73.2222	0.00724341	0.181296	RPL26P6	10	73422259	73422696	-	438	processed_pseudogene	ribosomal protein L26 pseudogene 6 [Source:HGNC Symbol;Acc:HGNC:34023]	-	0	10	0	1.11486
ENSG00000247675	6.18436	72.7242	0.00724341	0.181296	LRP4-AS1	11	46846412	46874396	+	1614	antisense	LRP4 antisense RNA 1 [Source:HGNC Symbol;Acc:HGNC:44128]	-	8	0	0.285997	0
ENSG00000272155	6.18436	72.7242	0.00724341	0.181296	AC055822.1	8	65714334	65714778	-	445	antisense	novel transcript, antisense to MTFR1	-	8	0	1.0373	0
ENSG00000267322	6.18436	72.7242	0.00724341	0.181296	SNHG22	18	49814023	49851059	+	2593	antisense	small nucleolar RNA host gene 22 [Source:HGNC Symbol;Acc:HGNC:50285]	-	8	0	0.178017	0
ENSG00000228217	6.18436	72.7242	0.00724341	0.181296	PNRC2P1	1	117778087	117778506	-	420	processed_pseudogene	proline rich nuclear receptor coactivator 2 pseudogene 1 [Source:HGNC Symbol;Acc:HGNC:51933]	-	8	0	1.09905	0
ENSG00000263120	-6.19421	73.2222	0.00724341	0.181296	AC004584.3	17	56982749	56985104	+	2356	sense_intronic	novel transcript, sense intronic to SCPEP1	-	0	10	0	0.207261
ENSG00000234770	-6.19421	73.2222	0.00724341	0.181296	GULOP	8	27560274	27589073	+	748	unitary_pseudogene	gulonolactone (L-) oxidase, pseudogene [Source:HGNC Symbol;Acc:HGNC:4695]	-	0	10	0	0.652817
ENSG00000283051	-6.19421	73.2222	0.00724341	0.181296	LINC01668	21	42777819	42779994	-	513	lincRNA	long intergenic non-protein coding RNA 1668 [Source:HGNC Symbol;Acc:HGNC:52456]	-	0	10	0	0.951865
ENSG00000235887	-6.19421	73.2222	0.00724341	0.181296	AC239859.3	1	143499187	143500512	-	408	lincRNA	novel transcript	-	0	10	0	1.19683
ENSG00000152034	-6.19421	73.2222	0.00724341	0.181296	MCHR2	6	99919910	99994247	-	2392	protein_coding	melanin concentrating hormone receptor 2 [Source:HGNC Symbol;Acc:HGNC:20867]	-	0	10	0	0.204142
ENSG00000173728	6.18436	72.7242	0.00724341	0.181296	C1orf100	1	244352635	244389663	+	1151	protein_coding	chromosome 1 open reading frame 100 [Source:HGNC Symbol;Acc:HGNC:30435]	-	8	0	0.401042	0
ENSG00000261864	6.18436	72.7242	0.00724341	0.181296	AC130462.1	16	68077340	68122271	+	549	processed_transcript	novel transcript	-	8	0	0.8408	0
ENSG00000241431	6.18436	72.7242	0.00724341	0.181296	RPL37P6	8	56588385	56588787	+	403	transcribed_processed_pseudogene	ribosomal protein L37 pseudogene 6 [Source:HGNC Symbol;Acc:HGNC:31080]	-	8	0	1.14541	0
ENSG00000161911	-6.19421	73.2222	0.00724341	0.181296	TREML1	6	41149342	41154337	-	1483	protein_coding	triggering receptor expressed on myeloid cells like 1 [Source:HGNC Symbol;Acc:HGNC:20434]	-	0	10	0	0.32927
ENSG00000261055	6.18436	72.7242	0.00724341	0.181296	AL450468.2	1	109895973	109897861	+	1889	lincRNA	novel transcript	-	8	0	0.244362	0
ENSG00000259868	6.18436	72.7242	0.00724341	0.181296	AL163952.1	14	55896547	55962970	+	1516	processed_transcript	novel transcript	-	8	0	0.304485	0
ENSG00000259237	-6.19421	73.2222	0.00724341	0.181296	LINC02490	15	53116365	53129698	+	601	lincRNA	long intergenic non-protein coding RNA 2490 [Source:HGNC Symbol;Acc:HGNC:53471]	-	0	10	0	0.812491
ENSG00000259702	6.18436	72.7242	0.00724341	0.181296	AC024337.1	15	96045341	96064357	-	1635	lincRNA	novel transcript	-	8	0	0.282324	0
ENSG00000031081	-1.43872	2.7108	0.0072533	0.181348	ARHGAP31	3	119294373	119420714	+	9384	protein_coding	Rho GTPase activating protein 31 [Source:HGNC Symbol;Acc:HGNC:29216]	-	24	81	0.14757	0.421493
ENSG00000153976	1.38652	2.61448	0.00726212	0.181374	HS3ST3A1	17	13495689	13601927	-	2628	protein_coding	heparan sulfate-glucosamine 3-sulfotransferase 3A1 [Source:HGNC Symbol;Acc:HGNC:5196]	-	76	36	1.66864	0.668914
ENSG00000083457	1.13636	2.19826	0.00738957	0.184229	ITGAE	17	3714628	3801243	-	6657	protein_coding	integrin subunit alpha E [Source:HGNC Symbol;Acc:HGNC:6147]	-	882	498	7.64478	3.65295
ENSG00000141378	1.13256	2.19248	0.0073923	0.184229	PTRH2	17	59674636	59707626	-	4740	protein_coding	peptidyl-tRNA hydrolase 2 [Source:HGNC Symbol;Acc:HGNC:24265]	-	1051	595	12.7938	6.12959
ENSG00000197410	-1.15831	2.23196	0.00743182	0.185016	DCHS2	4	154231742	154495570	-	20429	protein_coding	dachsous cadherin-related 2 [Source:HGNC Symbol;Acc:HGNC:23111]	-	197	546	0.556409	1.30508
ENSG00000221963	-1.14624	2.21337	0.00746091	0.185541	APOL6	22	35648395	35668409	+	10121	protein_coding	apolipoprotein L6 [Source:HGNC Symbol;Acc:HGNC:14870]	-	282	775	1.60768	3.73914
ENSG00000261762	1.68841	3.22301	0.00749892	0.185906	AC027228.2	15	78589123	78591276	-	2154	antisense	novel transcript, antisense to CHRNA5	-	34	13	0.910769	0.294707
ENSG00000149564	-1.71254	3.27737	0.00749892	0.185906	ESAM	11	124752583	124762290	-	2920	protein_coding	endothelial cell adhesion molecule [Source:HGNC Symbol;Acc:HGNC:17474]	-	10	41	0.197602	0.685636
ENSG00000203772	1.32552	2.50623	0.00749956	0.185906	SPRN	10	133420666	133424572	-	3128	protein_coding	shadow of prion protein [Source:HGNC Symbol;Acc:HGNC:16871]	-	89	44	1.64172	0.686877
ENSG00000169020	1.16315	2.23946	0.00754209	0.186649	ATP5ME	4	672436	674338	-	940	protein_coding	ATP synthase membrane subunit e [Source:HGNC Symbol;Acc:HGNC:846]	-	388	215	23.8165	11.1687
ENSG00000107738	-1.13444	2.19533	0.00754558	0.186649	VSIR	10	71747559	71773498	-	5128	protein_coding	V-set immunoregulatory receptor [Source:HGNC Symbol;Acc:HGNC:30085]	-	350	954	3.93817	9.08434
ENSG00000116649	1.11535	2.16648	0.00757168	0.186954	SRM	1	11054584	11060024	-	1898	protein_coding	spermidine synthase [Source:HGNC Symbol;Acc:HGNC:11296]	-	2693	1543	81.8682	39.6974
ENSG00000279861	1.88083	3.68287	0.00758204	0.186954	AC073548.1	19	47487638	47489519	-	1882	TEC	TEC	-	27	9	0.827788	0.233516
ENSG00000253227	-1.90833	3.75374	0.00758204	0.186954	AC090192.2	8	124271683	124277584	+	553	lincRNA	novel transcript	-	7	33	0.730378	2.91395
ENSG00000105227	-1.48065	2.79075	0.00761025	0.187252	PRX	19	40393768	40413366	-	5767	protein_coding	periaxin [Source:HGNC Symbol;Acc:HGNC:13797]	-	21	73	0.210109	0.61811
ENSG00000214954	1.45925	2.74965	0.00761025	0.187252	LRRC69	8	91101832	91219236	+	3056	protein_coding	leucine rich repeat containing 69 [Source:HGNC Symbol;Acc:HGNC:34303]	-	60	27	1.13285	0.431423
ENSG00000235174	1.13266	2.19263	0.00766136	0.188311	RPL39P3	6	73373108	73373263	-	156	processed_pseudogene	ribosomal protein L39 pseudogene 3 [Source:HGNC Symbol;Acc:HGNC:21383]	-	772	437	285.54	136.789
ENSG00000153885	1.15138	2.22126	0.00772655	0.189538	KCTD15	19	33795933	33815763	+	6388	protein_coding	potassium channel tetramerization domain containing 15 [Source:HGNC Symbol;Acc:HGNC:23297]	-	426	238	3.84786	1.8193
ENSG00000245910	1.11456	2.16528	0.00773956	0.189538	SNHG6	8	66921684	66926398	-	1247	processed_transcript	small nucleolar RNA host gene 6 [Source:HGNC Symbol;Acc:HGNC:32965]	-	2013	1154	93.1434	45.1889
ENSG00000200534	1.37063	2.58584	0.00776662	0.189538	SNORA33	6	132817219	132817348	+	130	snoRNA	small nucleolar RNA, H/ACA box 33 [Source:HGNC Symbol;Acc:HGNC:32623]	-	71	34	31.513	12.7711
ENSG00000079112	-1.10861	2.15638	0.00779872	0.189538	CDH17	8	94127171	94217303	-	3901	protein_coding	cadherin 17 [Source:HGNC Symbol;Acc:HGNC:1756]	-	2071	5544	30.6323	69.3969
ENSG00000168275	1.13056	2.18943	0.00782328	0.189538	COA6	1	234373456	234384049	+	1257	protein_coding	cytochrome c oxidase assembly factor 6 [Source:HGNC Symbol;Acc:HGNC:18025]	-	755	428	34.6567	16.6265
ENSG00000026950	-1.35742	2.56226	0.00783514	0.189538	BTN3A1	6	26402237	26415216	+	5547	protein_coding	butyrophilin subfamily 3 member A1 [Source:HGNC Symbol;Acc:HGNC:1138]	-	32	102	0.332864	0.897914
ENSG00000222033	-1.35742	2.56226	0.00783514	0.189538	LINC01124	2	170712451	170714567	-	2117	lincRNA	long intergenic non-protein coding RNA 1124 [Source:HGNC Symbol;Acc:HGNC:49270]	-	32	102	0.872176	2.35273
ENSG00000187522	1.11787	2.17027	0.00785811	0.189538	HSPA14	10	14838164	14871741	+	2644	protein_coding	heat shock protein family A (Hsp70) member 14 [Source:HGNC Symbol;Acc:HGNC:29526]	-	1397	799	30.4867	14.7563
ENSG00000136040	-1.12904	2.18713	0.00786096	0.189538	PLXNC1	12	94148723	94307675	+	9887	protein_coding	plexin C1 [Source:HGNC Symbol;Acc:HGNC:9106]	-	341	926	1.99005	4.5734
ENSG00000164023	2.48069	5.58165	0.00786477	0.189538	SGMS2	4	107824563	107915047	+	7635	protein_coding	sphingomyelin synthase 2 [Source:HGNC Symbol;Acc:HGNC:28395]	-	14	3	0.105802	0.0191869
ENSG00000151967	2.48069	5.58165	0.00786477	0.189538	SCHIP1	3	159839861	159897360	+	7645	protein_coding	schwannomin interacting protein 1 [Source:HGNC Symbol;Acc:HGNC:15678]	-	14	3	0.105664	0.0191618
ENSG00000124466	-2.62219	6.15685	0.00786477	0.189538	LYPD3	19	43460787	43465660	-	2519	protein_coding	LY6/PLAUR domain containing 3 [Source:HGNC Symbol;Acc:HGNC:24880]	-	2	16	0.0458117	0.310159
ENSG00000260711	3.03417	8.19177	0.00786477	0.189538	AL121839.2	14	91752856	91759798	-	6943	sense_intronic	novel transcript, intronic to CATSPERB	-	14	2	0.116347	0.0140662
ENSG00000213057	3.03417	8.19177	0.00786477	0.189538	C1orf220	1	178542752	178548889	+	2775	lincRNA	chromosome 1 open reading frame 220 (putative) [Source:HGNC Symbol;Acc:HGNC:33805]	-	14	2	0.291098	0.0351933
ENSG00000258365	3.03417	8.19177	0.00786477	0.189538	AC073655.2	12	94277758	94282844	-	1116	antisense	novel transcript, antisense to PLXNC1	-	14	2	0.723834	0.0875102
ENSG00000101440	3.03417	8.19177	0.00786477	0.189538	ASIP	20	34194569	34269344	+	778	protein_coding	agouti signaling protein [Source:HGNC Symbol;Acc:HGNC:745]	-	14	2	1.0383	0.125529
ENSG00000226087	-2.62219	6.15685	0.00786477	0.189538	AC073283.2	2	47225794	47239225	+	677	lincRNA	novel transcript	-	2	16	0.170458	1.15405
ENSG00000197320	2.48069	5.58165	0.00786477	0.189538	AC060834.1	7	9726241	9728272	+	2032	processed_pseudogene	C3 and PZP-like, alpha-2-macroglobulin domain containing 8 (CPAMD8) pseudogene	-	14	3	0.397539	0.0720926
ENSG00000174827	-1.11356	2.16379	0.00786617	0.189538	PDZK1	1	145670852	145708148	-	2480	protein_coding	PDZ domain containing 1 [Source:HGNC Symbol;Acc:HGNC:8821]	-	867	2329	20.1717	45.8575
ENSG00000166441	1.10266	2.14751	0.00792701	0.190806	RPL27A	11	8682411	8714759	+	7193	protein_coding	ribosomal protein L27a [Source:HGNC Symbol;Acc:HGNC:10329]	-	21351	12342	171.271	83.7854
ENSG00000170482	-1.28087	2.42985	0.00794022	0.19085	SLC23A1	5	139367196	139384553	-	3203	protein_coding	solute carrier family 23 member 1 [Source:HGNC Symbol;Acc:HGNC:10974]	-	49	148	0.882702	2.2563
ENSG00000118181	1.10315	2.14823	0.00794524	0.19085	RPS25	11	119015712	119018691	-	1477	protein_coding	ribosomal protein S25 [Source:HGNC Symbol;Acc:HGNC:10413]	-	11091	6409	433.276	211.886
ENSG00000180573	1.11229	2.16188	0.00802026	0.192453	HIST1H2AC	6	26124145	26139116	+	1668	protein_coding	histone cluster 1 H2A family member c [Source:HGNC Symbol;Acc:HGNC:4733]	-	1463	840	50.6085	24.591
ENSG00000148942	-1.14899	2.21758	0.00805681	0.192826	SLC5A12	11	26667019	26723427	-	7544	protein_coding	solute carrier family 5 member 12 [Source:HGNC Symbol;Acc:HGNC:28750]	-	203	559	1.55263	3.61829
ENSG00000258441	1.12633	2.18303	0.00806445	0.192826	LINC00641	14	21200079	21206900	-	5715	processed_transcript	long intergenic non-protein coding RNA 641 [Source:HGNC Symbol;Acc:HGNC:27511]	-	693	394	6.99668	3.36646
ENSG00000197774	1.14229	2.20731	0.00807976	0.192826	EME2	16	1773207	1781708	+	6909	protein_coding	essential meiotic structure-specific endonuclease subunit 2 [Source:HGNC Symbol;Acc:HGNC:27289]	-	466	262	3.89176	1.85174
ENSG00000124102	-1.13709	2.19937	0.00809915	0.192826	PI3	20	45174876	45176544	+	577	protein_coding	peptidase inhibitor 3 [Source:HGNC Symbol;Acc:HGNC:8947]	-	249	680	24.8999	57.5474
ENSG00000176153	1.11136	2.1605	0.00811335	0.192826	GPX2	14	64939152	64942905	-	1499	protein_coding	glutathione peroxidase 2 [Source:HGNC Symbol;Acc:HGNC:4554]	-	1610	925	61.9725	30.1323
ENSG00000173915	1.10346	2.1487	0.00812438	0.192826	ATP5MD	10	103389041	103396492	-	924	protein_coding	ATP synthase membrane subunit DAPIT [Source:HGNC Symbol;Acc:HGNC:30889]	-	3590	2074	224.18	109.605
ENSG00000163006	1.12854	2.18637	0.00813102	0.192826	CCDC138	2	108786757	108885477	+	5796	protein_coding	coiled-coil domain containing 138 [Source:HGNC Symbol;Acc:HGNC:26531]	-	606	344	6.0328	2.89816
ENSG00000134955	2.00687	4.0191	0.00813533	0.192826	SLC37A2	11	125063067	125090312	+	6371	protein_coding	solute carrier family 37 member 2 [Source:HGNC Symbol;Acc:HGNC:20644]	-	23	7	0.208303	0.0536517
ENSG00000272909	2.00687	4.0191	0.00813533	0.192826	AL122035.2	14	64440369	64442238	-	1870	antisense	novel transcript, antisense to MTHFD1	-	23	7	0.709678	0.182789
ENSG00000232352	-2.09656	4.2769	0.00813533	0.192826	SEMA3B-AS1	3	50266641	50267371	-	338	antisense	SEMA3B antisense RNA 1 (head to head) [Source:HGNC Symbol;Acc:HGNC:49096]	-	5	27	0.853549	3.90068
ENSG00000127325	-2.14877	4.43449	0.00813533	0.192826	BEST3	12	69643360	69699476	-	6863	protein_coding	bestrophin 3 [Source:HGNC Symbol;Acc:HGNC:17105]	-	5	28	0.0420369	0.199222
ENSG00000130489	2.00687	4.0191	0.00813533	0.192826	SCO2	22	50523568	50525606	-	1022	protein_coding	SCO2, cytochrome c oxidase assembly protein [Source:HGNC Symbol;Acc:HGNC:10604]	-	23	7	1.29853	0.334457
ENSG00000165730	-1.42083	2.67739	0.00818219	0.193586	STOX1	10	68827541	68895432	+	3904	protein_coding	storkhead box 1 [Source:HGNC Symbol;Acc:HGNC:23508]	-	24	80	0.354712	1.00063
ENSG00000106078	-1.1168	2.16866	0.00818403	0.193586	COBL	7	51016212	51316818	-	14349	protein_coding	cordon-bleu WH2 repeat protein [Source:HGNC Symbol;Acc:HGNC:22199]	-	478	1287	1.92212	4.37975
ENSG00000206120	1.8337	3.56449	0.00820426	0.193867	EGFEM1P	3	168249522	168830599	+	4658	transcribed_unitary_pseudogene	EGF like and EMI domain containing 1, pseudogene [Source:HGNC Symbol;Acc:HGNC:25149]	-	29	10	0.359231	0.104832
ENSG00000260853	1.30924	2.47811	0.00821951	0.193936	AC109460.2	16	28956687	28966883	-	1092	antisense	novel transcript, antisense to NFATC2IP	-	88	44	4.64981	1.96754
ENSG00000132359	1.13058	2.18946	0.00822729	0.193936	RAP1GAP2	17	2755705	3037739	+	7530	protein_coding	RAP1 GTPase activating protein 2 [Source:HGNC Symbol;Acc:HGNC:29176]	-	561	318	4.29876	2.06217
ENSG00000257743	1.54897	2.92607	0.00823221	0.193936	MGAM2	7	142111749	142222324	+	8162	protein_coding	maltase-glucoamylase 2 (putative) [Source:HGNC Symbol;Acc:HGNC:28101]	-	45	19	0.31812	0.113671
ENSG00000266094	-1.14623	2.21335	0.00831423	0.194507	RASSF5	1	206507530	206589448	+	6976	protein_coding	Ras association domain family member 5 [Source:HGNC Symbol;Acc:HGNC:17609]	-	175	481	1.44746	3.36691
ENSG00000145335	-1.13455	2.1955	0.00833426	0.194507	SNCA	4	89724099	89838315	-	4014	protein_coding	synuclein alpha [Source:HGNC Symbol;Acc:HGNC:11138]	-	241	657	3.46429	7.99247
ENSG00000099974	1.60559	3.04321	0.00835646	0.194507	DDTL	22	23966901	23972532	+	1545	protein_coding	D-dopachrome tautomerase like [Source:HGNC Symbol;Acc:HGNC:33446]	-	37	15	1.38181	0.474084
ENSG00000171227	-1.09941	2.14267	0.00837214	0.194507	TMEM37	2	119429901	119438520	+	2292	protein_coding	transmembrane protein 37 [Source:HGNC Symbol;Acc:HGNC:18216]	-	1691	4498	42.57	95.8292
ENSG00000121895	-3.25122	9.52172	0.00839028	0.194507	TMEM156	4	38966744	39032922	-	2562	protein_coding	transmembrane protein 156 [Source:HGNC Symbol;Acc:HGNC:26260]	-	1	13	0.0225214	0.247775
ENSG00000175697	3.59885	12.116	0.00839028	0.194507	GPR156	3	120164645	120285094	-	6058	protein_coding	G protein-coupled receptor 156 [Source:HGNC Symbol;Acc:HGNC:20844]	-	11	1	0.10477	0.00806053
ENSG00000280734	-3.25122	9.52172	0.00839028	0.194507	LINC01232	13	99486962	99499306	-	6199	processed_transcript	long intergenic non-protein coding RNA 1232 [Source:HGNC Symbol;Acc:HGNC:49755]	-	1	13	0.00930793	0.102403
ENSG00000260651	3.59885	12.116	0.00839028	0.194507	AF213884.3	4	102500841	102501319	-	479	antisense	novel transcript, antisense NFKB1	-	11	1	1.32505	0.101943
ENSG00000225218	3.59885	12.116	0.00839028	0.194507	AP001628.1	21	42831040	42836477	-	285	lincRNA	novel transcript	-	11	1	2.22701	0.171336
ENSG00000244218	3.59885	12.116	0.00839028	0.194507	RN7SL81P	7	128761338	128761598	+	261	misc_RNA	RNA, 7SL, cytoplasmic 81, pseudogene [Source:HGNC Symbol;Acc:HGNC:46097]	-	11	1	2.4318	0.187091
ENSG00000249790	3.59885	12.116	0.00839028	0.194507	AC092490.1	12	8788257	8795789	+	2279	lincRNA	novel transcript	-	11	1	0.278499	0.0214264
ENSG00000232874	3.59885	12.116	0.00839028	0.194507	AC080129.2	3	194130616	194131201	-	430	antisense	novel transcript	-	11	1	1.47604	0.11356
ENSG00000266313	3.59885	12.116	0.00839028	0.194507	AC026254.2	17	27333256	27348491	+	454	lincRNA	novel transcript	-	11	1	1.39801	0.107557
ENSG00000233487	-3.25122	9.52172	0.00839028	0.194507	RPSAP69	3	196983890	196987558	-	1189	transcribed_processed_pseudogene	ribosomal protein SA pseudogene 69 [Source:HGNC Symbol;Acc:HGNC:51922]	-	1	13	0.0485281	0.533893
ENSG00000143768	-3.25122	9.52172	0.00839028	0.194507	LEFTY2	1	225936598	225941489	-	2392	protein_coding	left-right determination factor 2 [Source:HGNC Symbol;Acc:HGNC:3122]	-	1	13	0.024122	0.265384
ENSG00000285040	-3.25122	9.52172	0.00839028	0.194507	AC092723.4	16	85963328	85985386	-	1007	lincRNA	novel transcript	-	1	13	0.0572988	0.630386
ENSG00000181458	-1.13363	2.1941	0.00841555	0.194899	TMEM45A	3	100492619	100577444	+	6005	protein_coding	transmembrane protein 45A [Source:HGNC Symbol;Acc:HGNC:25480]	-	225	613	2.16194	4.98472
ENSG00000153814	-1.19232	2.2852	0.00844556	0.19532	JAZF1	7	27830573	28180743	-	4206	protein_coding	JAZF zinc finger 1 [Source:HGNC Symbol;Acc:HGNC:28917]	-	93	264	1.27582	3.06498
ENSG00000265055	-2.51891	5.73149	0.00845893	0.19532	AC145343.1	17	68096046	68101474	-	650	lincRNA	novel transcript	-	3	22	0.266307	1.65273
ENSG00000236095	2.12945	4.37549	0.00845893	0.19532	AL807757.2	9	94900429	94904754	+	779	sense_intronic	novel transcript	-	18	5	1.33325	0.313419
ENSG00000247735	-1.51442	2.85685	0.00851568	0.196435	AC120114.1	16	29926836	29928933	+	1762	antisense	uncharacterized LOC107984836 [Source:NCBI gene;Acc:107984836]	-	16	57	0.523949	1.57965
ENSG00000137171	-1.11205	2.16152	0.0085603	0.197269	KLC4	6	43040777	43075099	+	6421	protein_coding	kinesin light chain 4 [Source:HGNC Symbol;Acc:HGNC:21624]	-	452	1213	4.06173	9.22467
ENSG00000176165	1.30941	2.4784	0.00857011	0.197299	FOXG1	14	28760330	28770277	+	5358	protein_coding	forkhead box G1 [Source:HGNC Symbol;Acc:HGNC:3811]	Fork	94	47	1.01228	0.428339
ENSG00000169499	-1.10489	2.15082	0.00858066	0.197347	PLEKHA2	8	38901235	38973909	+	6325	protein_coding	pleckstrin homology domain containing A2 [Source:HGNC Symbol;Acc:HGNC:14336]	-	655	1749	5.97524	13.5027
ENSG00000185339	-1.37246	2.58911	0.00868456	0.19944	TCN2	22	30606838	30627278	+	3122	protein_coding	transcobalamin 2 [Source:HGNC Symbol;Acc:HGNC:11653]	-	27	87	0.499006	1.36075
ENSG00000279407	1.27069	2.41276	0.00868882	0.19944	AC007191.1	19	45714387	45717381	-	2995	TEC	TEC	-	109	56	2.09993	0.913028
ENSG00000114439	-1.10987	2.15826	0.00870892	0.199594	BBX	3	107522936	107811324	+	11877	protein_coding	BBX, HMG-box containing [Source:HGNC Symbol;Acc:HGNC:14422]	HMG	465	1246	2.25903	5.12276
ENSG00000132382	1.09367	2.13416	0.00871815	0.199594	MYBBP1A	17	4538897	4555631	-	6203	protein_coding	MYB binding protein 1a [Source:HGNC Symbol;Acc:HGNC:7546]	-	3313	1927	30.8173	15.1696
ENSG00000156804	-1.64858	3.13524	0.0087349	0.199594	FBXO32	8	123497889	123541206	-	7395	protein_coding	F-box protein 32 [Source:HGNC Symbol;Acc:HGNC:16731]	-	12	47	0.0936306	0.310351
ENSG00000229419	1.58904	3.00848	0.0087349	0.199594	RALGAPA1P1	9	105520128	105526359	+	6232	processed_pseudogene	Ral GTPase activating protein catalytic alpha subunit 1 pseudogene 1 [Source:HGNC Symbol;Acc:HGNC:23203]	-	39	16	0.361087	0.125368
ENSG00000197756	1.0889	2.12712	0.00873845	0.199594	RPL37A	2	216498189	216579180	+	6841	protein_coding	ribosomal protein L37a [Source:HGNC Symbol;Acc:HGNC:10348]	-	16138	9418	136.115	67.2252
ENSG00000164989	-1.7152	3.28343	0.00876482	0.199595	CCDC171	9	15553086	16061663	+	12153	protein_coding	coiled-coil domain containing 171 [Source:HGNC Symbol;Acc:HGNC:29828]	-	9	37	0.0427301	0.148666
ENSG00000270012	1.66981	3.18172	0.00876482	0.199595	AC232271.1	X	49273054	49275768	+	2715	lincRNA	novel transcript	-	31	12	0.65882	0.215826
ENSG00000235016	1.79384	3.46738	0.00876482	0.199595	SEMA3F-AS1	3	50116022	50156085	-	2949	antisense	SEMA3F antisense RNA 1 [Source:HGNC Symbol;Acc:HGNC:40518]	-	31	11	0.606543	0.182142
ENSG00000099840	-1.50137	2.83112	0.00878145	0.199595	IZUMO4	19	2096429	2099593	+	2770	protein_coding	IZUMO family member 4 [Source:HGNC Symbol;Acc:HGNC:26950]	-	17	60	0.354115	1.0577
ENSG00000273137	1.46145	2.75385	0.00878145	0.199595	AL022328.2	22	50208461	50209542	-	640	antisense	uncharacterized LOC105373095 [Source:NCBI gene;Acc:105373095]	-	49	22	4.41765	1.67856
ENSG00000176731	1.11677	2.1686	0.00884024	0.200736	C8orf59	8	85214076	85220421	-	2514	protein_coding	chromosome 8 open reading frame 59 [Source:HGNC Symbol;Acc:HGNC:32235]	-	643	368	14.7578	7.14785
ENSG00000077092	-1.28138	2.43071	0.00887067	0.20123	RARB	3	25174332	25597932	+	3697	protein_coding	retinoic acid receptor beta [Source:HGNC Symbol;Acc:HGNC:9865]	THR-like	46	139	0.717932	1.83594
ENSG00000164236	1.15818	2.23176	0.00888547	0.201347	ANKRD33B	5	10564330	10657816	+	9783	protein_coding	ankyrin repeat domain 33B [Source:HGNC Symbol;Acc:HGNC:35240]	-	277	154	1.63374	0.768673
ENSG00000198743	-1.12499	2.181	0.00889313	0.201347	SLC5A3	21	34073570	34106262	+	11576	protein_coding	solute carrier family 5 member 3 [Source:HGNC Symbol;Acc:HGNC:11038]	-	233	631	1.16137	2.66173
ENSG00000171202	1.11049	2.15919	0.00891579	0.201663	TMEM126A	11	85647967	85656547	+	971	protein_coding	transmembrane protein 126A [Source:HGNC Symbol;Acc:HGNC:25382]	-	715	411	42.4876	20.6688
ENSG00000204428	1.26022	2.39532	0.00895826	0.202427	LY6G5C	6	31676684	31684040	-	2621	protein_coding	lymphocyte antigen 6 family member G5C [Source:HGNC Symbol;Acc:HGNC:13932]	-	114	59	2.50965	1.0992
ENSG00000145147	-1.12692	2.18392	0.00897265	0.202556	SLIT2	4	20253260	20620561	+	9712	protein_coding	slit guidance ligand 2 [Source:HGNC Symbol;Acc:HGNC:11086]	-	229	621	1.36051	3.12231
ENSG00000148735	1.93747	3.83033	0.00898543	0.202595	PLEKHS1	10	113751454	113783429	+	5402	protein_coding	pleckstrin homology domain containing S1 [Source:HGNC Symbol;Acc:HGNC:26285]	-	25	8	0.26703	0.072315
ENSG00000270127	1.26747	2.40739	0.00899184	0.202595	AC027020.2	15	100547765	100550153	-	2389	lincRNA	novel transcript	-	101	52	2.43938	1.06287
ENSG00000165124	-1.46663	2.76376	0.00903088	0.203278	SVEP1	9	110365251	110579880	-	14190	protein_coding	sushi, von Willebrand factor type A, EGF and pentraxin domain containing 1 [Source:HGNC Symbol;Acc:HGNC:15985]	-	18	62	0.0731922	0.213355
ENSG00000176533	-1.14865	2.21706	0.00905398	0.203601	GNG7	19	2511219	2702709	-	4561	protein_coding	G protein subunit gamma 7 [Source:HGNC Symbol;Acc:HGNC:4410]	-	150	413	1.89761	4.42163
ENSG00000111801	-1.62314	3.08044	0.00908383	0.204075	BTN3A3	6	26440472	26453415	+	5658	protein_coding	butyrophilin subfamily 3 member A3 [Source:HGNC Symbol;Acc:HGNC:1140]	-	13	50	0.132573	0.431519
ENSG00000198918	1.08412	2.12008	0.0091501	0.205361	RPL39	X	119786504	119791643	-	2141	protein_coding	ribosomal protein L39 [Source:HGNC Symbol;Acc:HGNC:10350]	-	6051	3543	163.074	80.8067
ENSG00000115758	1.08267	2.11795	0.00915876	0.205361	ODC1	2	10439968	10448504	-	2968	protein_coding	ornithine decarboxylase 1 [Source:HGNC Symbol;Acc:HGNC:8109]	-	10660	6248	207.237	102.795
ENSG00000102230	-1.27083	2.413	0.00918536	0.205759	PCYT1B	X	24558087	24672677	-	5555	protein_coding	phosphate cytidylyltransferase 1, choline, beta [Source:HGNC Symbol;Acc:HGNC:8755]	-	43	129	0.446642	1.13396
ENSG00000173213	-1.10422	2.14982	0.0092091	0.205982	TUBB8P12	18	47390	49557	-	1633	protein_coding	tubulin beta 8 pseudogene 12 [Source:HGNC Symbol;Acc:HGNC:24983]	-	405	1081	14.3101	32.3245
ENSG00000102174	-1.11794	2.17037	0.00921304	0.205982	PHEX	X	22032441	22251310	+	6384	protein_coding	phosphate regulating endopeptidase homolog X-linked [Source:HGNC Symbol;Acc:HGNC:8918]	-	272	733	2.45839	5.60666
ENSG00000008517	-1.08452	2.12068	0.00926258	0.206861	IL32	16	3065297	3082192	+	3209	protein_coding	interleukin 32 [Source:HGNC Symbol;Acc:HGNC:16830]	-	1764	4644	31.7179	70.6668
ENSG00000230082	1.64548	3.12852	0.00927012	0.206861	PRRT3-AS1	3	9947404	9954787	+	614	antisense	PRRT3 antisense RNA 1 [Source:HGNC Symbol;Acc:HGNC:41151]	-	33	13	3.10113	1.03387
ENSG00000104881	-1.10383	2.14925	0.00937736	0.208764	PPP1R13L	19	45379634	45406349	-	5032	protein_coding	protein phosphatase 1 regulatory subunit 13 like [Source:HGNC Symbol;Acc:HGNC:18838]	-	371	990	4.2541	9.60699
ENSG00000152952	-1.07919	2.11286	0.0093861	0.208764	PLOD2	3	146069440	146163653	-	7646	protein_coding	procollagen-lysine,2-oxoglutarate 5-dioxygenase 2 [Source:HGNC Symbol;Acc:HGNC:9082]	-	5086	13340	38.3811	85.1951
ENSG00000182841	1.20368	2.30327	0.00939027	0.208764	RRP7BP	22	42555223	42582038	-	5092	transcribed_unprocessed_pseudogene	ribosomal RNA processing 7 homolog B, pseudogene [Source:HGNC Symbol;Acc:HGNC:30454]	-	156	84	1.76771	0.805534
ENSG00000170558	-1.0825	2.1177	0.00939132	0.208764	CDH2	18	27950966	28177446	-	4950	protein_coding	cadherin 2 [Source:HGNC Symbol;Acc:HGNC:1759]	-	1768	4648	20.6088	45.8515
ENSG00000213397	1.56097	2.95052	0.009406	0.20889	HAUS7	X	153447666	153495516	-	3968	protein_coding	HAUS augmin like complex subunit 7 [Source:HGNC Symbol;Acc:HGNC:32979]	-	43	18	0.625276	0.22151
ENSG00000168778	-1.12305	2.17806	0.0094389	0.209421	TCTN2	12	123671113	123708403	+	5106	protein_coding	tectonic family member 2 [Source:HGNC Symbol;Acc:HGNC:25774]	-	220	595	2.48609	5.69022
ENSG00000130768	-1.4791	2.78775	0.00948574	0.209691	SMPDL3B	1	27934993	27959157	+	2670	protein_coding	sphingomyelin phosphodiesterase acid like 3B [Source:HGNC Symbol;Acc:HGNC:21416]	-	19	66	0.410598	1.20705
ENSG00000278962	-1.4791	2.78775	0.00948574	0.209691	AC092645.1	2	112188364	112190635	+	2272	TEC	TEC	-	19	66	0.482525	1.4185
ENSG00000076641	-1.08692	2.12421	0.00948661	0.209691	PAG1	8	80967810	81112068	-	11023	protein_coding	phosphoprotein membrane anchor with glycosphingolipid microdomains 1 [Source:HGNC Symbol;Acc:HGNC:30043]	-	824	2173	4.31323	9.62615
ENSG00000142856	1.08895	2.12719	0.00948712	0.209691	ITGB3BP	1	63440770	63593721	-	5459	protein_coding	integrin subunit beta 3 binding protein [Source:HGNC Symbol;Acc:HGNC:6157]	-	1323	772	13.9837	6.90553
ENSG00000008988	1.07636	2.10872	0.00950765	0.209945	RPS20	8	56067295	56074581	-	3002	protein_coding	ribosomal protein S20 [Source:HGNC Symbol;Acc:HGNC:10405]	-	21249	12509	408.416	203.472
ENSG00000225178	1.08116	2.11573	0.00952815	0.210198	RPSAP58	19	23827162	23828049	+	888	processed_pseudogene	ribosomal protein SA pseudogene 58 [Source:HGNC Symbol;Acc:HGNC:36809]	-	3056	1793	198.571	98.5962
ENSG00000198804	1.07393	2.10516	0.00961294	0.211867	MT-CO1	MT	5904	7445	+	1542	protein_coding	mitochondrially encoded cytochrome c oxidase I [Source:HGNC Symbol;Acc:HGNC:7419]	-	584459	344646	21869.8	10913.9
ENSG00000167014	1.25196	2.38165	0.00965045	0.212493	TERB2	15	44956702	44979229	+	1487	protein_coding	telomere repeat binding bouquet formation protein 2 [Source:HGNC Symbol;Acc:HGNC:28520]	-	98	51	3.80268	1.67476
ENSG00000188112	-1.86412	3.64046	0.00973082	0.213495	C6orf132	6	42101118	42142619	-	6852	protein_coding	chromosome 6 open reading frame 132 [Source:HGNC Symbol;Acc:HGNC:21288]	-	7	32	0.0589462	0.228048
ENSG00000226243	1.82661	3.54702	0.00973082	0.213495	RPL37AP1	20	44466564	44466842	-	279	processed_pseudogene	ribosomal protein L37a pseudogene 1 [Source:HGNC Symbol;Acc:HGNC:16548]	-	26	9	5.37705	1.57518
ENSG00000224165	-2.24164	4.72934	0.00973269	0.213495	DNAJC27-AS1	2	24971390	25039694	+	5651	antisense	DNAJC27 antisense RNA 1 [Source:HGNC Symbol;Acc:HGNC:42943]	-	4	24	0.0408422	0.207386
ENSG00000280099	2.02402	4.06715	0.00973269	0.213495	AL603750.1	1	85152487	85154203	-	1717	TEC	TEC	-	20	6	0.672101	0.170637
ENSG00000136261	1.08289	2.11827	0.00977674	0.214259	BZW2	7	16646131	16706523	+	3662	protein_coding	basic leucine zipper and W2 domains 2 [Source:HGNC Symbol;Acc:HGNC:18808]	-	1570	920	24.7375	12.2677
ENSG00000050165	-1.08953	2.12805	0.00980708	0.214722	DKK3	11	11963106	12009769	-	5059	protein_coding	dickkopf WNT signaling pathway inhibitor 3 [Source:HGNC Symbol;Acc:HGNC:2893]	-	514	1358	5.86237	13.1077
ENSG00000226415	-1.13859	2.20166	0.00983406	0.21511	TPI1P1	1	76699789	76700538	+	750	processed_pseudogene	triosephosphate isomerase 1 pseudogene 1 [Source:HGNC Symbol;Acc:HGNC:35449]	-	143	391	11.0014	25.4571
ENSG00000172915	-1.29751	2.45805	0.00987434	0.215403	NBEA	13	34942287	35673022	+	11949	protein_coding	neurobeachin [Source:HGNC Symbol;Acc:HGNC:7648]	-	35	107	0.16901	0.437265
ENSG00000273472	-1.29751	2.45805	0.00987434	0.215403	AC096733.2	4	140756528	140757921	+	1394	lincRNA	novel transcript	-	35	107	1.44871	3.74812
ENSG00000198899	1.07009	2.09956	0.00987524	0.215403	MT-ATP6	MT	8527	9207	+	681	protein_coding	mitochondrially encoded ATP synthase membrane subunit 6 [Source:HGNC Symbol;Acc:HGNC:7414]	-	147584	87260	12504.5	6256.93
ENSG00000231908	1.41043	2.65816	0.00988923	0.215496	IDH1-AS1	2	208255247	208256181	+	655	antisense	IDH1 antisense RNA 1 [Source:HGNC Symbol;Acc:HGNC:40292]	-	58	27	5.1093	2.01287
ENSG00000115266	-1.17731	2.26155	0.00990657	0.215496	APC2	19	1446302	1473244	+	12610	protein_coding	APC2, WNT signaling pathway regulator [Source:HGNC Symbol;Acc:HGNC:24036]	-	84	236	0.384361	0.913881
ENSG00000136522	1.0788	2.11227	0.00990732	0.215496	MRPL47	3	179588285	179604654	-	1370	protein_coding	mitochondrial ribosomal protein L47 [Source:HGNC Symbol;Acc:HGNC:16652]	-	1945	1143	81.917	40.7398
ENSG00000150938	-1.07726	2.11003	0.00996042	0.216363	CRIM1	2	36355926	36551135	+	7122	protein_coding	cysteine rich transmembrane BMP regulator 1 [Source:HGNC Symbol;Acc:HGNC:2359]	-	1067	2795	8.64445	19.1634
ENSG00000258949	1.50712	2.84242	0.00997985	0.216363	AL049870.3	14	44898908	44911863	-	360	antisense	uncharacterized LOC101927418 [Source:NCBI gene;Acc:101927418]	-	46	20	7.37276	2.71282
ENSG00000149269	-1.09555	2.13695	0.00998888	0.216363	PAK1	11	77321707	77474635	-	6299	protein_coding	p21 (RAC1) activated kinase 1 [Source:HGNC Symbol;Acc:HGNC:8590]	-	323	857	2.95873	6.64358
ENSG00000225630	1.07165	2.10184	0.00999123	0.216363	MTND2P28	1	629640	630683	+	1044	unprocessed_pseudogene	MT-ND2 pseudogene 28 [Source:HGNC Symbol;Acc:HGNC:42129]	-	5320	3142	294.026	146.96
ENSG00000167861	-1.12651	2.1833	0.00999374	0.216363	HID1	17	74950743	74973166	-	6196	protein_coding	HID1 domain containing [Source:HGNC Symbol;Acc:HGNC:15736]	-	149	404	1.38755	3.18392
ENSG00000127831	-1.07131	2.10135	0.0100608	0.217613	VIL1	2	218419092	218453295	+	6920	protein_coding	villin 1 [Source:HGNC Symbol;Acc:HGNC:12690]	-	2246	5859	18.7274	41.3438
ENSG00000111490	1.17991	2.26563	0.0100811	0.217742	TBC1D30	12	64780516	64881032	+	9325	protein_coding	TBC1 domain family member 30 [Source:HGNC Symbol;Acc:HGNC:29164]	-	179	98	1.10759	0.51318
ENSG00000136810	1.06995	2.09935	0.0100855	0.217742	TXN	9	110243811	110256640	-	1142	protein_coding	thioredoxin [Source:HGNC Symbol;Acc:HGNC:12435]	-	5887	3481	297.442	148.844
ENSG00000162729	-1.0917	2.13125	0.0101487	0.218903	IGSF8	1	160091340	160098943	-	2592	protein_coding	immunoglobulin superfamily member 8 [Source:HGNC Symbol;Acc:HGNC:17813]	-	373	987	8.30326	18.5941
ENSG00000138496	-1.11422	2.16478	0.010171	0.219054	PARP9	3	122527924	122564577	-	8938	protein_coding	poly(ADP-ribose) polymerase family member 9 [Source:HGNC Symbol;Acc:HGNC:24118]	-	202	543	1.30403	2.96655
ENSG00000258472	1.16834	2.24752	0.0101745	0.219054	AC005726.1	17	28455752	28614197	-	3218	protein_coding	novel protein	-	183	101	3.28125	1.5326
ENSG00000153993	1.083	2.11843	0.0102231	0.219574	SEMA3D	7	84995553	85186855	-	8062	protein_coding	semaphorin 3D [Source:HGNC Symbol;Acc:HGNC:10726]	-	1094	641	7.82978	3.88247
ENSG00000254233	-1.47718	2.78404	0.0102358	0.219574	LINC02365	4	184584093	184625030	-	1268	lincRNA	long intergenic non-protein coding RNA 2365 [Source:HGNC Symbol;Acc:HGNC:53285]	-	17	59	0.773579	2.27209
ENSG00000115946	1.08635	2.12337	0.0102363	0.219574	PNO1	2	68157844	68176238	+	2674	protein_coding	partner of NOB1 homolog [Source:HGNC Symbol;Acc:HGNC:32790]	-	893	522	19.2693	9.53239
ENSG00000161653	1.15757	2.23081	0.0102487	0.219574	NAGS	17	44004546	44009063	+	2822	protein_coding	N-acetylglutamate synthase [Source:HGNC Symbol;Acc:HGNC:17996]	-	205	114	4.19152	1.97261
ENSG00000228697	1.38046	2.60352	0.0102488	0.219574	AL023755.1	1	168400829	168495685	-	2556	lincRNA	uncharacterized LOC100505918 [Source:NCBI gene;Acc:100505918]	-	61	29	1.37703	0.554026
ENSG00000117139	-1.08733	2.1248	0.0102554	0.219574	KDM5B	1	202724495	202809470	-	25882	protein_coding	lysine demethylase 5B [Source:HGNC Symbol;Acc:HGNC:18039]	ARID	431	1137	0.960847	2.14514
ENSG00000169627	1.78327	3.44205	0.0103844	0.221726	BOLA2B	16	30192934	30194306	-	1365	protein_coding	bolA family member 2B [Source:HGNC Symbol;Acc:HGNC:32479]	-	28	10	1.18359	0.357734
ENSG00000233885	1.78327	3.44205	0.0103844	0.221726	YEATS2-AS1	3	183806457	183810783	-	3271	antisense	YEATS2 antisense RNA 1 [Source:HGNC Symbol;Acc:HGNC:41101]	-	28	10	0.493915	0.149284
ENSG00000153294	-1.76141	3.39028	0.0103844	0.221726	ADGRF4	6	47685864	47722021	+	3391	protein_coding	adhesion G protein-coupled receptor F4 [Source:HGNC Symbol;Acc:HGNC:19011]	-	8	34	0.136125	0.489603
ENSG00000257017	1.15629	2.22883	0.0104054	0.221749	HP	16	72054592	72061055	+	5405	protein_coding	haptoglobin [Source:HGNC Symbol;Acc:HGNC:5141]	-	212	118	2.26316	1.06605
ENSG00000161638	-1.06873	2.09758	0.0104111	0.221749	ITGA5	12	54395261	54419460	-	7577	protein_coding	integrin subunit alpha 5 [Source:HGNC Symbol;Acc:HGNC:6141]	-	1399	3643	10.6536	23.4777
ENSG00000188322	-1.38436	2.61057	0.0104142	0.221749	SBK1	16	28292519	28323849	+	4992	protein_coding	SH3 domain binding kinase 1 [Source:HGNC Symbol;Acc:HGNC:17699]	-	24	78	0.277403	0.76298
ENSG00000135549	1.07603	2.10823	0.0104386	0.222066	PKIB	6	122471917	122726373	+	3432	protein_coding	cAMP-dependent protein kinase inhibitor beta [Source:HGNC Symbol;Acc:HGNC:9018]	-	1318	776	22.1586	11.041
ENSG00000197261	1.13557	2.19706	0.01047	0.222405	C6orf141	6	49550646	49561907	+	2940	protein_coding	chromosome 6 open reading frame 141 [Source:HGNC Symbol;Acc:HGNC:21351]	-	278	157	5.45598	2.60763
ENSG00000106992	1.42679	2.68849	0.0104737	0.222405	AK1	9	127866480	127877743	-	2667	protein_coding	adenylate kinase 1 [Source:HGNC Symbol;Acc:HGNC:361]	-	50	23	1.08174	0.421112
ENSG00000132429	1.30897	2.47765	0.0104982	0.222606	POPDC3	6	105158280	105179995	-	1881	protein_coding	popeye domain containing 3 [Source:HGNC Symbol;Acc:HGNC:17649]	-	80	40	2.45401	1.0384
ENSG00000217555	1.55167	2.93156	0.0105118	0.222606	CKLF	16	66552563	66566251	+	1161	protein_coding	chemokine like factor [Source:HGNC Symbol;Acc:HGNC:13253]	-	38	16	1.88854	0.672947
ENSG00000266767	-1.61764	3.06873	0.0105118	0.222606	AP000897.2	18	7741310	7754831	-	1737	antisense	novel transcript, antisense to PTPRM	-	12	46	0.398617	1.29316
ENSG00000146094	1.111	2.15995	0.0105559	0.223336	DOK3	5	177501907	177511274	-	4823	protein_coding	docking protein 3 [Source:HGNC Symbol;Acc:HGNC:24583]	-	369	212	4.41453	2.1464
ENSG00000135047	-1.06548	2.09287	0.0106087	0.22417	CTSL	9	87725519	87731393	+	2366	protein_coding	cathepsin L [Source:HGNC Symbol;Acc:HGNC:2537]	-	1508	3918	36.7757	80.8616
ENSG00000204444	1.08581	2.12256	0.010628	0.22417	APOM	6	31652416	31658210	+	1660	protein_coding	apolipoprotein M [Source:HGNC Symbol;Acc:HGNC:13916]	-	708	414	24.6093	12.1783
ENSG00000067606	-1.22328	2.33477	0.0106339	0.22417	PRKCZ	1	2050470	2185395	+	7636	protein_coding	protein kinase C zeta [Source:HGNC Symbol;Acc:HGNC:9412]	-	51	148	0.385371	0.94643
ENSG00000183604	1.21706	2.32472	0.0106339	0.22417	SMG1P5	16	30267553	30335374	-	4791	transcribed_unprocessed_pseudogene	SMG1 pseudogene 5 [Source:HGNC Symbol;Acc:HGNC:49862]	-	120	64	1.44521	0.652299
ENSG00000151287	1.07894	2.11248	0.0106524	0.224356	TEX30	13	102765990	102773811	-	2154	protein_coding	testis expressed 30 [Source:HGNC Symbol;Acc:HGNC:25188]	-	868	510	23.2514	11.5616
ENSG00000105251	-1.20812	2.31037	0.0107693	0.226481	SHD	19	4278601	4290724	+	2811	protein_coding	Src homology 2 domain containing transforming protein D [Source:HGNC Symbol;Acc:HGNC:30633]	-	62	178	1.27264	3.09209
ENSG00000189056	1.10871	2.15653	0.0107983	0.226481	RELN	7	103471784	103989516	-	12642	protein_coding	reelin [Source:HGNC Symbol;Acc:HGNC:9957]	-	391	225	1.78458	0.86908
ENSG00000106526	-2.0424	4.1193	0.0108117	0.226481	ACTR3C	7	150243916	150323725	-	6460	protein_coding	ARP3 actin related protein 3 homolog C [Source:HGNC Symbol;Acc:HGNC:37282]	-	5	26	0.0446594	0.196532
ENSG00000197670	1.94306	3.8452	0.0108117	0.226481	AL157838.1	20	53552770	53575863	+	2502	antisense	uncharacterized LOC101927770 [Source:NCBI gene;Acc:101927770]	-	22	7	0.507353	0.136617
ENSG00000232888	1.94306	3.8452	0.0108117	0.226481	RPS11P5	12	132825701	132826184	+	484	processed_pseudogene	ribosomal protein S11 pseudogene 5 [Source:HGNC Symbol;Acc:HGNC:36312]	-	22	7	2.62272	0.706229
ENSG00000275882	1.94306	3.8452	0.0108117	0.226481	IKBKGP1	X	154639978	154648275	-	1073	unprocessed_pseudogene	inhibitor of nuclear factor kappa B kinase subunit gamma pseudogene 1 [Source:HGNC Symbol;Acc:HGNC:24455]	-	22	7	1.18304	0.31856
ENSG00000044446	-1.05958	2.08433	0.0108247	0.22655	PHKA2	X	18892300	18984598	-	9029	protein_coding	phosphorylase kinase regulatory subunit alpha 2 [Source:HGNC Symbol;Acc:HGNC:8926]	-	2926	7571	18.6986	40.9455
ENSG00000233927	1.06123	2.08671	0.0108892	0.227695	RPS28	19	8321158	8323340	+	2119	protein_coding	ribosomal protein S28 [Source:HGNC Symbol;Acc:HGNC:10418]	-	3162	1881	86.1005	43.3462
ENSG00000128965	-1.09782	2.14032	0.010944	0.228115	CHAC1	15	40952962	40956519	+	2058	protein_coding	ChaC glutathione specific gamma-glutamylcyclotransferase 1 [Source:HGNC Symbol;Acc:HGNC:28680]	-	222	590	6.22419	13.9991
ENSG00000249348	-1.67582	3.19502	0.0109584	0.228115	UGDH-AS1	4	39528019	39594707	+	2787	antisense	UGDH antisense RNA 1 [Source:HGNC Symbol;Acc:HGNC:40601]	-	9	36	0.186329	0.630752
ENSG00000279331	1.74671	3.35593	0.0109584	0.228115	RBM12B-AS1	8	93740121	93740773	+	653	TEC	RBM12B antisense RNA 1 [Source:HGNC Symbol;Acc:HGNC:28818]	-	30	11	2.65084	0.822569
ENSG00000171790	1.74671	3.35593	0.0109584	0.228115	SLFNL1	1	41015597	41023237	-	4310	protein_coding	schlafen like 1 [Source:HGNC Symbol;Acc:HGNC:26313]	-	30	11	0.401623	0.124626
ENSG00000196119	1.62268	3.07946	0.0109584	0.228115	OR8A1	11	124566660	124582942	+	6088	protein_coding	olfactory receptor family 8 subfamily A member 1 [Source:HGNC Symbol;Acc:HGNC:8469]	-	30	12	0.284329	0.0962497
ENSG00000185008	-1.09276	2.13282	0.0109766	0.228289	ROBO2	3	75906695	77649964	+	16663	protein_coding	roundabout guidance receptor 2 [Source:HGNC Symbol;Acc:HGNC:10250]	-	236	625	0.81721	1.83155
ENSG00000163624	-1.08956	2.12809	0.0110307	0.229114	CDS1	4	84582979	84651338	+	4461	protein_coding	CDP-diacylglycerol synthase 1 [Source:HGNC Symbol;Acc:HGNC:1800]	-	274	724	3.544	7.925
ENSG00000123975	1.05766	2.08155	0.011036	0.229114	CKS2	9	89311198	89316703	+	613	protein_coding	CDC28 protein kinase regulatory subunit 2 [Source:HGNC Symbol;Acc:HGNC:2000]	-	4390	2618	413.218	208.546
ENSG00000100068	1.16371	2.24033	0.0110676	0.229567	LRP5L	22	25351418	25405377	-	4687	protein_coding	LDL receptor related protein 5 like [Source:HGNC Symbol;Acc:HGNC:25323]	-	177	98	2.17898	1.021
ENSG00000164109	1.05961	2.08437	0.0110812	0.229643	MAD2L1	4	120055608	120067074	-	5748	protein_coding	mitotic arrest deficient 2 like 1 [Source:HGNC Symbol;Acc:HGNC:6763]	-	2690	1602	27.0029	13.6094
ENSG00000185088	1.05483	2.07747	0.0110921	0.229665	RPS27L	15	63125872	63158021	-	9127	protein_coding	ribosomal protein S27 like [Source:HGNC Symbol;Acc:HGNC:18476]	-	9007	5382	56.9413	28.7944
ENSG00000175093	-1.10468	2.15051	0.0111144	0.229922	SPSB4	3	141051402	141148611	+	3740	protein_coding	splA/ryanodine receptor domain and SOCS box containing 4 [Source:HGNC Symbol;Acc:HGNC:30630]	-	173	462	2.66901	6.03203
ENSG00000156482	1.05452	2.07702	0.0111314	0.230032	RPL30	8	98024851	98046469	-	4027	protein_coding	ribosomal protein L30 [Source:HGNC Symbol;Acc:HGNC:10333]	-	8135	4862	116.56	58.9558
ENSG00000164078	-1.54559	2.91923	0.0111591	0.230032	MST1R	3	49887002	49903873	-	5252	protein_coding	macrophage stimulating 1 receptor [Source:HGNC Symbol;Acc:HGNC:7381]	-	14	51	0.153808	0.474175
ENSG00000134538	-1.54559	2.91923	0.0111591	0.230032	SLCO1B1	12	21131202	21239246	+	2229	protein_coding	solute carrier organic anion transporter family member 1B1 [Source:HGNC Symbol;Acc:HGNC:10959]	-	14	51	0.362404	1.11726
ENSG00000084731	-1.13642	2.19835	0.0111593	0.230032	KIF3C	2	25926596	25982749	-	6403	protein_coding	kinesin family member 3C [Source:HGNC Symbol;Acc:HGNC:6321]	-	115	314	1.03631	2.39463
ENSG00000104408	1.05379	2.07597	0.0111798	0.230251	EIF3E	8	108201216	108435333	-	6005	protein_coding	eukaryotic translation initiation factor 3 subunit E [Source:HGNC Symbol;Acc:HGNC:3277]	-	8457	5057	81.2603	41.1219
ENSG00000164587	1.05273	2.07445	0.0111982	0.230425	RPS14	5	150442635	150449756	-	5099	protein_coding	ribosomal protein S14 [Source:HGNC Symbol;Acc:HGNC:10387]	-	13825	8273	156.443	79.2266
ENSG00000162413	1.06265	2.08877	0.0112315	0.230905	KLHL21	1	6590724	6614607	-	6901	protein_coding	kelch like family member 21 [Source:HGNC Symbol;Acc:HGNC:29041]	-	1464	870	12.2406	6.15602
ENSG00000084734	1.38539	2.61242	0.0112742	0.231579	GCKR	2	27496842	27523684	+	3146	protein_coding	glucokinase regulator [Source:HGNC Symbol;Acc:HGNC:4196]	-	57	27	1.04542	0.419081
ENSG00000142784	-1.07424	2.10562	0.0112864	0.231625	WDTC1	1	27234516	27308633	+	6024	protein_coding	WD and tetratricopeptide repeats 1 [Source:HGNC Symbol;Acc:HGNC:29175]	-	407	1064	3.89838	8.62481
ENSG00000261351	1.48354	2.79635	0.0114402	0.234327	AC116913.1	15	66488658	66492109	-	2168	antisense	novel transcript, antisense to MAP2K1	-	43	19	1.14442	0.427944
ENSG00000114670	-1.39402	2.62811	0.0114429	0.234327	NEK11	3	131026850	131350465	+	5355	protein_coding	NIMA related kinase 11 [Source:HGNC Symbol;Acc:HGNC:18593]	-	22	72	0.237049	0.656547
ENSG00000152137	-1.07321	2.10412	0.0114584	0.234327	HSPB8	12	119178642	119221131	+	2860	protein_coding	heat shock protein family B (small) member 8 [Source:HGNC Symbol;Acc:HGNC:30171]	-	387	1011	7.80764	17.2615
ENSG00000264112	1.10228	2.14694	0.0114588	0.234327	AC015813.1	17	57989039	57994850	-	5812	lincRNA	novel transcript	-	327	189	3.24636	1.58792
ENSG00000106591	1.06013	2.08511	0.0114685	0.234327	MRPL32	7	42932200	42948958	+	3534	protein_coding	mitochondrial ribosomal protein L32 [Source:HGNC Symbol;Acc:HGNC:14035]	-	1448	862	23.6416	11.9106
ENSG00000163319	1.08417	2.12015	0.011485	0.234458	MRPS18C	4	83455932	83469735	+	4866	protein_coding	mitochondrial ribosomal protein S18C [Source:HGNC Symbol;Acc:HGNC:16633]	-	492	288	5.83402	2.8901
ENSG00000205220	-1.23605	2.35553	0.0115275	0.235121	PSMB10	16	67934502	67937087	-	1853	protein_coding	proteasome subunit beta 10 [Source:HGNC Symbol;Acc:HGNC:9538]	-	42	123	1.30782	3.24132
ENSG00000197712	-1.05401	2.07629	0.0115447	0.235266	FAM114A1	4	38867677	38945739	+	4871	protein_coding	family with sequence similarity 114 member A1 [Source:HGNC Symbol;Acc:HGNC:25087]	-	1276	3289	15.115	32.9715
ENSG00000138166	1.05055	2.07133	0.0116058	0.235756	DUSP5	10	110497838	110511544	+	2615	protein_coding	dual specificity phosphatase 5 [Source:HGNC Symbol;Acc:HGNC:3071]	-	3993	2393	88.1054	44.6852
ENSG00000171421	1.11118	2.16023	0.0116621	0.235756	MRPL36	5	1798386	1801366	-	1394	protein_coding	mitochondrial ribosomal protein L36 [Source:HGNC Symbol;Acc:HGNC:14490]	-	289	166	11.9622	5.81485
ENSG00000173702	-1.06328	2.08967	0.0116839	0.235756	MUC13	3	124905442	124953819	-	3499	protein_coding	mucin 13, cell surface associated [Source:HGNC Symbol;Acc:HGNC:7511]	-	498	1292	8.21222	18.0307
ENSG00000181004	1.47549	2.78078	0.011697	0.235756	BBS12	4	122732702	122744943	+	3432	protein_coding	Bardet-Biedl syndrome 12 [Source:HGNC Symbol;Acc:HGNC:26648]	-	45	20	0.756554	0.284561
ENSG00000130487	-1.46302	2.75685	0.011697	0.235756	KLHDC7B	22	50545891	50551023	+	5133	protein_coding	kelch domain containing 7B [Source:HGNC Symbol;Acc:HGNC:25145]	-	16	55	0.179855	0.52322
ENSG00000130775	1.47549	2.78078	0.011697	0.235756	THEMIS2	1	27872543	27886685	+	4621	protein_coding	thymocyte selection associated family member 2 [Source:HGNC Symbol;Acc:HGNC:16839]	-	45	20	0.56189	0.211343
ENSG00000274253	-1.46302	2.75685	0.011697	0.235756	AC138649.1	15	22757857	22778741	+	1640	sense_overlapping	uncharacterized LOC283683 [Source:NCBI gene;Acc:283683]	-	16	55	0.562926	1.63761
ENSG00000258315	1.87884	3.67779	0.0117239	0.235756	C17orf49	17	7014495	7017525	+	2628	protein_coding	chromosome 17 open reading frame 49 [Source:HGNC Symbol;Acc:HGNC:28737]	-	24	8	0.52694	0.148647
ENSG00000213700	-1.94137	3.84071	0.0117239	0.235756	RPL17P50	10	73005833	73006595	-	546	processed_pseudogene	ribosomal protein L17 pseudogene 50 [Source:HGNC Symbol;Acc:HGNC:45098]	-	6	29	0.634065	2.59357
ENSG00000186074	1.87884	3.67779	0.0117239	0.235756	CD300LF	17	74694311	74712978	-	2161	protein_coding	CD300 molecule like family member f [Source:HGNC Symbol;Acc:HGNC:29883]	-	24	8	0.640813	0.180771
ENSG00000120594	-1.34696	2.54375	0.0117497	0.235756	PLXDC2	10	19816239	20289856	+	12567	protein_coding	plexin domain containing 2 [Source:HGNC Symbol;Acc:HGNC:21013]	-	24	76	0.110193	0.295308
ENSG00000196975	-1.04528	2.06376	0.0117918	0.235756	ANXA4	2	69644425	69827100	+	11048	protein_coding	annexin A4 [Source:HGNC Symbol;Acc:HGNC:542]	-	6006	15387	31.3673	68.0085
ENSG00000223901	2.04751	4.13391	0.011803	0.235756	AP001469.1	21	46220269	46225364	+	1117	antisense	novel transcript	-	17	5	0.878154	0.21858
ENSG00000267940	2.04751	4.13391	0.011803	0.235756	AC022762.2	11	6201901	6203253	-	1353	lincRNA	novel transcript	-	17	5	0.72498	0.180453
ENSG00000264290	2.04751	4.13391	0.011803	0.235756	AC104564.3	17	29569580	29570519	+	465	sense_intronic	novel transcript	-	17	5	2.10946	0.525061
ENSG00000253438	2.92814	7.61127	0.0118324	0.235756	PCAT1	8	126556323	127419050	+	16848	antisense	prostate cancer associated transcript 1 [Source:HGNC Symbol;Acc:HGNC:43022]	-	13	2	0.0445215	0.00579662
ENSG00000142920	-2.52991	5.77535	0.0118324	0.235756	AZIN2	1	33081104	33120530	+	6559	protein_coding	antizyme inhibitor 2 [Source:HGNC Symbol;Acc:HGNC:29957]	-	2	15	0.0175941	0.111673
ENSG00000151882	-2.52991	5.77535	0.0118324	0.235756	CCL28	5	43376645	43412391	-	4524	protein_coding	C-C motif chemokine ligand 28 [Source:HGNC Symbol;Acc:HGNC:17700]	-	2	15	0.0255083	0.161905
ENSG00000225975	-2.52991	5.77535	0.0118324	0.235756	LINC01534	19	36685440	36687449	-	1138	lincRNA	long intergenic non-protein coding RNA 1534 [Source:HGNC Symbol;Acc:HGNC:51281]	-	2	15	0.101406	0.643638
ENSG00000279140	2.92814	7.61127	0.0118324	0.235756	AL590326.1	14	104815449	104815753	-	305	TEC	novel transcript	-	13	2	2.45934	0.320201
ENSG00000239445	-2.52991	5.77535	0.0118324	0.235756	ST3GAL6-AS1	3	98714330	98732651	-	843	antisense	ST3GAL6 antisense RNA 1 [Source:HGNC Symbol;Acc:HGNC:40828]	-	2	15	0.136892	0.868874
ENSG00000233515	2.92814	7.61127	0.0118324	0.235756	LINC01518	10	42674197	42691723	-	519	lincRNA	long intergenic non-protein coding RNA 1518 [Source:HGNC Symbol;Acc:HGNC:51216]	-	13	2	1.44528	0.188172
ENSG00000266897	2.92814	7.61127	0.0118324	0.235756	AC005546.1	19	13131571	13132410	+	391	lincRNA	novel transcript	-	13	2	1.91841	0.249773
ENSG00000256006	2.92814	7.61127	0.0118324	0.235756	AC084117.1	11	18405609	18406731	+	270	sense_intronic	novel transcript	-	13	2	2.77814	0.361709
ENSG00000197165	2.92814	7.61127	0.0118324	0.235756	SULT1A2	16	28591943	28597109	-	2275	protein_coding	sulfotransferase family 1A member 2 [Source:HGNC Symbol;Acc:HGNC:11454]	-	13	2	0.329714	0.0429281
ENSG00000172578	-2.52991	5.77535	0.0118324	0.235756	KLHL6	3	183487531	183555689	-	10546	protein_coding	kelch like family member 6 [Source:HGNC Symbol;Acc:HGNC:18653]	-	2	15	0.0109425	0.0694539
ENSG00000133169	1.05209	2.07353	0.0118596	0.236096	BEX1	X	103062651	103064240	-	864	protein_coding	brain expressed X-linked 1 [Source:HGNC Symbol;Acc:HGNC:1036]	-	1916	1147	127.955	64.825
ENSG00000196136	1.58258	2.99505	0.0119088	0.23681	SERPINA3	14	94612377	94624055	+	5007	protein_coding	serpin family A member 3 [Source:HGNC Symbol;Acc:HGNC:16]	-	34	14	0.391811	0.136535
ENSG00000151715	-1.13892	2.20216	0.0119159	0.23681	TMEM45B	11	129815819	129860003	+	3027	protein_coding	transmembrane protein 45B [Source:HGNC Symbol;Acc:HGNC:25194]	-	87	238	1.65837	3.83935
ENSG00000168421	1.19759	2.29357	0.0119404	0.237096	RHOH	4	40191053	40246967	+	6608	protein_coding	ras homolog family member H [Source:HGNC Symbol;Acc:HGNC:686]	-	111	60	0.969232	0.443378
ENSG00000166012	1.05722	2.08092	0.0119966	0.237852	TAF1D	11	93729948	93784391	-	8420	protein_coding	TATA-box binding protein associated factor, RNA polymerase I subunit D [Source:HGNC Symbol;Acc:HGNC:28759]	-	1140	680	7.8121	3.94357
ENSG00000276180	1.09433	2.13513	0.0120133	0.237852	HIST1H4I	6	27138588	27139881	+	1294	protein_coding	histone cluster 1 H4 family member i [Source:HGNC Symbol;Acc:HGNC:4793]	-	351	204	15.6512	7.69819
ENSG00000213326	1.07713	2.10983	0.0120229	0.237852	RPS7P11	17	46721582	46722167	-	586	processed_pseudogene	ribosomal protein S7 pseudogene 11 [Source:HGNC Symbol;Acc:HGNC:35841]	-	510	300	50.2166	24.9986
ENSG00000129521	-1.18508	2.27376	0.0121121	0.237852	EGLN3	14	33924231	34462774	-	7359	protein_coding	egl-9 family hypoxia inducible factor 3 [Source:HGNC Symbol;Acc:HGNC:14661]	-	63	178	0.493966	1.18112
ENSG00000157193	1.05585	2.07894	0.0121429	0.237852	LRP8	1	53242364	53328070	-	10263	protein_coding	LDL receptor related protein 8 [Source:HGNC Symbol;Acc:HGNC:6700]	-	1226	732	6.89273	3.48281
ENSG00000161960	1.09317	2.13342	0.0122889	0.237852	EIF4A1	17	7572706	7579005	+	5316	protein_coding	eukaryotic translation initiation factor 4A1 [Source:HGNC Symbol;Acc:HGNC:3282]	-	349	203	3.78805	1.86468
ENSG00000171219	-1.64497	3.12742	0.0123028	0.237852	CDC42BPG	11	64823387	64844569	-	6112	protein_coding	CDC42 binding protein kinase gamma [Source:HGNC Symbol;Acc:HGNC:29829]	-	11	43	0.103845	0.343541
ENSG00000134853	1.10485	2.15076	0.0123398	0.237852	PDGFRA	4	54229097	54298247	+	9732	protein_coding	platelet derived growth factor receptor alpha [Source:HGNC Symbol;Acc:HGNC:8803]	-	286	165	1.69566	0.827894
ENSG00000135119	-1.23514	2.35404	0.012411	0.237852	RNFT2	12	116738178	116853631	+	6487	protein_coding	ring finger protein, transmembrane 2 [Source:HGNC Symbol;Acc:HGNC:25905]	-	41	120	0.364682	0.903296
ENSG00000258674	1.28913	2.44381	0.0124778	0.237852	AC011448.1	19	19516227	19536076	+	1846	protein_coding	readthrough between NDUFA13 and YJEFN3	-	73	37	2.28174	0.97873
ENSG00000095059	1.17186	2.25302	0.0124784	0.237852	DHPS	19	12675717	12681902	-	3006	protein_coding	deoxyhypusine synthase [Source:HGNC Symbol;Acc:HGNC:2869]	-	129	71	2.47614	1.15335
ENSG00000185905	-1.81852	3.52719	0.0124954	0.237852	C16orf54	16	29742463	29746006	-	2585	protein_coding	chromosome 16 open reading frame 54 [Source:HGNC Symbol;Acc:HGNC:26649]	-	7	31	0.156247	0.58559
ENSG00000164683	-1.06043	2.08555	0.0125173	0.237852	HEY1	8	79764010	79767863	-	3232	protein_coding	hes related family bHLH transcription factor with YRPW motif 1 [Source:HGNC Symbol;Acc:HGNC:4880]	bHLH	358	927	6.39126	14.0056
ENSG00000102316	-1.04168	2.05862	0.0125229	0.237852	MAGED2	X	54807599	54816012	+	2940	protein_coding	MAGE family member D2 [Source:HGNC Symbol;Acc:HGNC:16353]	-	1303	3330	25.5724	55.3082
ENSG00000117262	-1.07965	2.11353	0.0125266	0.237852	GPR89A	1	145607990	145670648	+	5557	protein_coding	G protein-coupled receptor 89A [Source:HGNC Symbol;Acc:HGNC:31984]	-	213	559	2.21164	4.91207
ENSG00000244313	1.04741	2.06682	0.0126228	0.237852	AC024293.1	11	46428653	46429150	-	498	processed_pseudogene	ribosomal protein S10 (RPS10) pseudogene	-	1397	839	161.861	82.267
ENSG00000170175	-1.07173	2.10196	0.0126389	0.237852	CHRNB1	17	7445061	7457707	+	4329	protein_coding	cholinergic receptor nicotinic beta 1 subunit [Source:HGNC Symbol;Acc:HGNC:1961]	-	241	629	3.21221	7.09506
ENSG00000188659	1.51331	2.85464	0.0126523	0.237852	SAXO2	15	82262810	82284930	+	4160	protein_coding	stabilizer of axonemal microtubules 2 [Source:HGNC Symbol;Acc:HGNC:33727]	-	37	16	0.513196	0.18781
ENSG00000182134	-1.10653	2.15328	0.0127055	0.237852	TDRKH	1	151770107	151791416	-	5092	protein_coding	tudor and KH domain containing [Source:HGNC Symbol;Acc:HGNC:11713]	-	132	353	1.49575	3.38516
ENSG00000162444	-6.04439	66	0.0127308	0.237852	RBP7	1	9997206	10016020	+	861	protein_coding	retinol binding protein 7 [Source:HGNC Symbol;Acc:HGNC:30316]	-	0	9	0	0.510425
ENSG00000095303	-6.04439	66	0.0127308	0.237852	PTGS1	9	122370530	122395703	+	5791	protein_coding	prostaglandin-endoperoxide synthase 1 [Source:HGNC Symbol;Acc:HGNC:9604]	-	0	9	0	0.0758895
ENSG00000224536	-6.04439	66	0.0127308	0.237852	AC096677.1	1	201507241	201534784	+	1516	antisense	novel transcript	-	0	9	0	0.289892
ENSG00000259863	5.99455	63.7586	0.0127308	0.237852	SH3RF3-AS1	2	109127327	109128930	-	1604	lincRNA	SH3RF3 antisense RNA 1 [Source:HGNC Symbol;Acc:HGNC:44168]	-	7	0	0.251807	0
ENSG00000162913	-6.04439	66	0.0127308	0.237852	OBSCN-AS1	1	228203506	228213664	-	3647	antisense	OBSCN antisense RNA 1 [Source:HGNC Symbol;Acc:HGNC:32047]	-	0	9	0	0.120503
ENSG00000232725	5.99455	63.7586	0.0127308	0.237852	U52111.1	X	153735626	153766478	-	1087	antisense	novel transcript	-	7	0	0.371572	0
ENSG00000123892	5.99455	63.7586	0.0127308	0.237852	RAB38	11	88113242	88175467	-	1465	protein_coding	RAB38, member RAS oncogene family [Source:HGNC Symbol;Acc:HGNC:9776]	-	7	0	0.275699	0
ENSG00000272004	5.99455	63.7586	0.0127308	0.237852	FO704657.1	1	1659325	1662602	+	400	antisense	novel transcript, antisense to SLC35E2B	-	7	0	1.00975	0
ENSG00000269318	5.99455	63.7586	0.0127308	0.237852	AC007292.2	19	4356637	4358448	-	1812	antisense	novel transcript, antisense to MPND	-	7	0	0.222902	0
ENSG00000272081	-6.04439	66	0.0127308	0.237852	AC008972.2	5	72955206	72955699	-	494	lincRNA	novel transcript	-	0	9	0	0.889628
ENSG00000230530	5.99455	63.7586	0.0127308	0.237852	LIMD1-AS1	3	45679043	45689134	-	1651	bidirectional_promoter_lncRNA	LIMD1 antisense RNA 1 [Source:HGNC Symbol;Acc:HGNC:44107]	-	7	0	0.244639	0
ENSG00000241362	5.99455	63.7586	0.0127308	0.237852	RPL36AP43	15	89687937	89688243	-	307	processed_pseudogene	ribosomal protein L36a pseudogene 43 [Source:HGNC Symbol;Acc:HGNC:36791]	-	7	0	1.31563	0
ENSG00000241889	-6.04439	66	0.0127308	0.237852	AC079944.2	3	113885298	113886031	+	734	processed_pseudogene	dullard homolog (Xenopus laevis) (DULLARD) pseudogene	-	0	9	0	0.598741
ENSG00000254786	-6.04439	66	0.0127308	0.237852	AP001636.1	11	58995439	58999689	-	1122	unprocessed_pseudogene	Glycine N-acyltransferase-like protein 1 (GLYATL1) pseudogene	-	0	9	0	0.39169
ENSG00000206921	-6.04439	66	0.0127308	0.237852	RNU6-481P	1	161401289	161401395	+	107	snRNA	RNA, U6 small nuclear 481, pseudogene [Source:HGNC Symbol;Acc:HGNC:47444]	-	0	9	0	4.10725
ENSG00000258458	5.99455	63.7586	0.0127308	0.237852	AL160314.2	14	22701476	22766562	-	2513	processed_transcript	novel transcript, antisense to OXA1L	-	7	0	0.160724	0
ENSG00000215032	5.99455	63.7586	0.0127308	0.237852	GNL3LP1	5	60891935	60893577	-	1643	processed_pseudogene	G protein nucleolar 3 like pseudogene 1 [Source:HGNC Symbol;Acc:HGNC:25733]	-	7	0	0.24583	0
ENSG00000179256	5.99455	63.7586	0.0127308	0.237852	SMCO3	12	14804650	14814182	-	2104	protein_coding	single-pass membrane protein with coiled-coil domains 3 [Source:HGNC Symbol;Acc:HGNC:34401]	-	7	0	0.191967	0
ENSG00000122584	-6.04439	66	0.0127308	0.237852	NXPH1	7	8433955	8752963	+	3430	protein_coding	neurexophilin 1 [Source:HGNC Symbol;Acc:HGNC:20693]	-	0	9	0	0.128127
ENSG00000229487	5.99455	63.7586	0.0127308	0.237852	ALG13-AS1	X	111706649	111711101	-	195	antisense	ALG13 antisense RNA 1 [Source:HGNC Symbol;Acc:HGNC:41277]	-	7	0	2.07128	0
ENSG00000285649	5.99455	63.7586	0.0127308	0.237852	AL357079.2	1	43968351	43974821	-	2044	antisense	novel transcript, antisense to DPH2 and ATP6V0B	-	7	0	0.197602	0
ENSG00000230333	5.99455	63.7586	0.0127308	0.237852	AC004160.1	7	11180902	11520175	+	5660	processed_transcript	novel transcript, antisense to THSD7A	-	7	0	0.0713603	0
ENSG00000149043	-6.04439	66	0.0127308	0.237852	SYT8	11	1828307	1837521	+	4704	protein_coding	synaptotagmin 8 [Source:HGNC Symbol;Acc:HGNC:19264]	-	0	9	0	0.0934261
ENSG00000165917	5.99455	63.7586	0.0127308	0.237852	RAPSN	11	47437757	47449178	-	1918	protein_coding	receptor associated protein of the synapse [Source:HGNC Symbol;Acc:HGNC:9863]	-	7	0	0.210584	0
ENSG00000162670	5.99455	63.7586	0.0127308	0.237852	BRINP3	1	190097662	190478404	-	4287	protein_coding	BMP/retinoic acid inducible neural specific 3 [Source:HGNC Symbol;Acc:HGNC:22393]	-	7	0	0.0942149	0
ENSG00000254042	-6.04439	66	0.0127308	0.237852	AC011365.1	5	168706567	168720884	+	3478	antisense	uncharacterized LOC101927969 [Source:NCBI gene;Acc:101927969]	-	0	9	0	0.126359
ENSG00000105122	-6.04439	66	0.0127308	0.237852	RASAL3	19	15451624	15464571	-	4681	protein_coding	RAS protein activator like 3 [Source:HGNC Symbol;Acc:HGNC:26129]	-	0	9	0	0.0938851
ENSG00000167476	5.99455	63.7586	0.0127308	0.237852	JSRP1	19	2252252	2269759	-	1950	protein_coding	junctional sarcoplasmic reticulum protein 1 [Source:HGNC Symbol;Acc:HGNC:24963]	-	7	0	0.207128	0
ENSG00000270557	-6.04439	66	0.0127308	0.237852	AC013731.1	2	157877683	157878565	+	883	lincRNA	novel transcript	-	0	9	0	0.497708
ENSG00000131055	-6.04439	66	0.0127308	0.237852	COX4I2	20	31637888	31645006	+	693	protein_coding	cytochrome c oxidase subunit 4I2 [Source:HGNC Symbol;Acc:HGNC:16232]	-	0	9	0	0.634165
ENSG00000277895	5.99455	63.7586	0.0127308	0.237852	AC135279.3	12	64451591	64452901	-	1311	antisense	novel transcript, antisense to TBK1	-	7	0	0.308085	0
ENSG00000267776	5.99455	63.7586	0.0127308	0.237852	AC006116.10	19	56376704	56377284	-	581	sense_intronic	novel transcript	-	7	0	0.695179	0
ENSG00000268157	5.99455	63.7586	0.0127308	0.237852	AC010524.1	19	49356152	49357769	+	494	antisense	novel transcript, antisense to TEAD2	-	7	0	0.81761	0
ENSG00000231966	5.99455	63.7586	0.0127308	0.237852	AL359853.2	1	179829609	179836124	-	353	lincRNA	novel transcript	-	7	0	1.14419	0
ENSG00000273216	5.99455	63.7586	0.0127308	0.237852	AC002059.1	22	29316744	29317220	-	477	sense_intronic	novel transcript, novel transcript, sense intronic to RASL10A	-	7	0	0.846749	0
ENSG00000252213	5.99455	63.7586	0.0127308	0.237852	SNORA74D	5	139276180	139276320	+	141	snoRNA	small nucleolar RNA, H/ACA box 74D [Source:HGNC Symbol;Acc:HGNC:52219]	-	7	0	2.86453	0
ENSG00000130598	-6.04439	66	0.0127308	0.237852	TNNI2	11	1838989	1841680	+	1082	protein_coding	troponin I2, fast skeletal type [Source:HGNC Symbol;Acc:HGNC:11946]	-	0	9	0	0.40617
ENSG00000237864	-6.04439	66	0.0127308	0.237852	LINC00322	21	43322417	43332039	-	699	lincRNA	long intergenic non-protein coding RNA 322 [Source:HGNC Symbol;Acc:HGNC:33698]	-	0	9	0	0.628721
ENSG00000270270	5.99455	63.7586	0.0127308	0.237852	BNIP3P10	19	19870723	19871299	-	577	processed_pseudogene	BCL2 interacting protein 3 pseudogene 10 [Source:HGNC Symbol;Acc:HGNC:49690]	-	7	0	0.699999	0
ENSG00000039987	5.99455	63.7586	0.0127308	0.237852	BEST2	19	12751702	12758458	+	2646	protein_coding	bestrophin 2 [Source:HGNC Symbol;Acc:HGNC:17107]	-	7	0	0.152645	0
ENSG00000258044	5.99455	63.7586	0.0127308	0.237852	AC073569.1	12	79823778	79825496	+	667	antisense	novel transcript, antisense to PPP1R12A	-	7	0	0.605546	0
ENSG00000229609	-6.04439	66	0.0127308	0.237852	LINC01079	13	27373348	27374366	+	580	lincRNA	long intergenic non-protein coding RNA 1079 [Source:HGNC Symbol;Acc:HGNC:49122]	-	0	9	0	0.757718
ENSG00000185198	-6.04439	66	0.0127308	0.237852	PRSS57	19	685546	695498	-	1090	protein_coding	serine protease 57 [Source:HGNC Symbol;Acc:HGNC:31397]	-	0	9	0	0.403189
ENSG00000275084	5.99455	63.7586	0.0127308	0.237852	SNORD91B	17	2329016	2329237	-	222	snoRNA	small nucleolar RNA, C/D box 91B [Source:HGNC Symbol;Acc:HGNC:32753]	-	7	0	1.81937	0
ENSG00000207357	5.99455	63.7586	0.0127308	0.237852	RNU6-2	19	1021522	1021628	+	107	snRNA	RNA, U6 small nuclear 2 [Source:HGNC Symbol;Acc:HGNC:34270]	-	7	0	3.77476	0
ENSG00000243135	-6.04439	66	0.0127308	0.237852	UGT1A3	2	233729108	233773299	+	2364	protein_coding	UDP glucuronosyltransferase family 1 member A3 [Source:HGNC Symbol;Acc:HGNC:12535]	-	0	9	0	0.185904
ENSG00000247774	-6.04439	66	0.0127308	0.237852	PCED1B-AS1	12	47205898	47216456	-	3092	processed_transcript	PCED1B antisense RNA 1 [Source:HGNC Symbol;Acc:HGNC:44166]	-	0	9	0	0.142133
ENSG00000276823	5.99455	63.7586	0.0127308	0.237852	RF00017	X	48524480	48524806	+	327	misc_RNA		-	7	0	1.23517	0
ENSG00000260062	5.99455	63.7586	0.0127308	0.237852	GOLGA2P11	15	62253730	62270680	-	5272	transcribed_unprocessed_pseudogene	GOLGA2 pseudogene 11 [Source:HGNC Symbol;Acc:HGNC:26788]	-	7	0	0.0766121	0
ENSG00000105392	5.99455	63.7586	0.0127308	0.237852	CRX	19	47819779	47843330	+	5991	protein_coding	cone-rod homeobox [Source:HGNC Symbol;Acc:HGNC:2383]	TF_Otx	7	0	0.0674177	0
ENSG00000281162	5.99455	63.7586	0.0127308	0.237852	LINC01127	2	101962056	101987167	+	3841	lincRNA	long intergenic non-protein coding RNA 1127 [Source:HGNC Symbol;Acc:HGNC:49292]	-	7	0	0.105155	0
ENSG00000173467	5.99455	63.7586	0.0127308	0.237852	AGR3	7	16859405	16881987	-	1160	protein_coding	anterior gradient 3, protein disulphide isomerase family member [Source:HGNC Symbol;Acc:HGNC:24167]	-	7	0	0.348189	0
ENSG00000164556	5.99455	63.7586	0.0127308	0.237852	FAM183BP	7	38685346	38687037	-	1595	processed_pseudogene	family with sequence similarity 183 member B, pseudogene [Source:HGNC Symbol;Acc:HGNC:34511]	-	7	0	0.253228	0
ENSG00000184502	5.99455	63.7586	0.0127308	0.237852	GAST	17	41712326	41715969	+	470	protein_coding	gastrin [Source:HGNC Symbol;Acc:HGNC:4164]	-	7	0	0.85936	0
ENSG00000236609	-1.15869	2.23255	0.0127355	0.237852	ZNF853	7	6615617	6624290	+	3857	protein_coding	zinc finger protein 853 [Source:HGNC Symbol;Acc:HGNC:21767]	zf-C2H2	62	172	0.927507	2.17757
ENSG00000183298	1.2069	2.30841	0.0127762	0.238421	RPSAP19	1	101786340	101787219	-	880	processed_pseudogene	ribosomal protein SA pseudogene 19 [Source:HGNC Symbol;Acc:HGNC:36508]	-	108	58	7.08135	3.21839
ENSG00000173083	-1.27017	2.41189	0.0128455	0.239522	HPSE	4	83292461	83335153	-	4721	protein_coding	heparanase [Source:HGNC Symbol;Acc:HGNC:5164]	-	33	99	0.403325	1.02399
ENSG00000166340	-1.04032	2.05668	0.0129614	0.241489	TPP1	11	6612763	6619485	-	6544	protein_coding	tripeptidyl peptidase 1 [Source:HGNC Symbol;Acc:HGNC:2073]	-	835	2132	7.36238	15.9088
ENSG00000104880	-1.08433	2.1204	0.0129885	0.2418	ARHGEF18	19	7395113	7472477	+	6235	protein_coding	Rho/Rac guanine nucleotide exchange factor 18 [Source:HGNC Symbol;Acc:HGNC:17090]	-	169	445	1.56396	3.48511
ENSG00000112394	-1.06761	2.09595	0.0130493	0.242578	SLC16A10	6	111087503	111231194	+	11237	protein_coding	solute carrier family 16 member 10 [Source:HGNC Symbol;Acc:HGNC:17027]	-	239	622	1.22722	2.70292
ENSG00000176771	-1.07752	2.1104	0.0130511	0.242578	NCKAP5	2	132671799	133568463	-	9552	protein_coding	NCK associated protein 5 [Source:HGNC Symbol;Acc:HGNC:29847]	-	174	456	1.05107	2.33111
ENSG00000231351	-1.71851	3.29097	0.0131493	0.244208	AC111200.2	2	86930250	86930754	-	505	processed_pseudogene	WW domain binding protein 1 (WBP1) pseudogene	-	8	33	0.914058	3.19092
ENSG00000165556	-1.0305	2.04273	0.013191	0.244359	CDX2	13	27962137	27971139	-	4122	protein_coding	caudal type homeobox 2 [Source:HGNC Symbol;Acc:HGNC:1806]	Homeobox	2538	6436	35.527	76.2432
ENSG00000214290	1.17704	2.26113	0.0132006	0.244359	COLCA2	11	111298555	111308735	+	2059	protein_coding	colorectal cancer associated 2 [Source:HGNC Symbol;Acc:HGNC:26978]	-	124	68	3.47488	1.61267
ENSG00000078900	-2.1806	4.53341	0.013231	0.244359	TP73	1	3652520	3736201	+	6763	protein_coding	tumor protein p73 [Source:HGNC Symbol;Acc:HGNC:12003]	P53	4	23	0.0341268	0.166066
ENSG00000165698	-2.1806	4.53341	0.013231	0.244359	SPACA9	9	132878027	132890201	+	2823	protein_coding	sperm acrosome associated 9 [Source:HGNC Symbol;Acc:HGNC:1367]	-	4	23	0.0817568	0.397841
ENSG00000116035	1.95044	3.86492	0.013231	0.244359	VAX2	2	70900590	70965373	+	2961	protein_coding	ventral anterior homeobox 2 [Source:HGNC Symbol;Acc:HGNC:12661]	Homeobox	19	6	0.370246	0.0989477
ENSG00000263335	-2.1806	4.53341	0.013231	0.244359	AF001548.2	16	15726674	15732993	+	836	antisense	novel transcript, antisense to MYH11	-	4	23	0.276076	1.34343
ENSG00000233588	1.95044	3.86492	0.013231	0.244359	CYP51A1P2	13	28722386	28724021	-	1499	processed_pseudogene	cytochrome P450 family 51 subfamily A member 1 pseudogene 2 [Source:HGNC Symbol;Acc:HGNC:20251]	-	19	6	0.731353	0.195453
ENSG00000241635	-1.32788	2.51034	0.0132567	0.244639	UGT1A1	2	233760248	233773299	+	4467	protein_coding	UDP glucuronosyltransferase family 1 member A1 [Source:HGNC Symbol;Acc:HGNC:12530]	-	24	75	0.310006	0.819857
ENSG00000164488	-1.07132	2.10136	0.0132757	0.244786	DACT2	6	168292830	168319754	-	4223	protein_coding	dishevelled binding antagonist of beta catenin 2 [Source:HGNC Symbol;Acc:HGNC:21231]	-	192	501	2.62334	5.79308
ENSG00000175662	-1.05644	2.07979	0.0133011	0.244786	TOM1L2	17	17843511	17972422	-	7863	protein_coding	target of myb1 like 2 membrane trafficking protein [Source:HGNC Symbol;Acc:HGNC:11984]	-	316	816	2.31886	5.06751
ENSG00000055118	3.46279	11.0256	0.0134121	0.244786	KCNH2	7	150944961	150978315	-	5877	protein_coding	potassium voltage-gated channel subfamily H member 2 [Source:HGNC Symbol;Acc:HGNC:6251]	-	10	1	0.0981791	0.00830878
ENSG00000118997	-3.13701	8.797	0.0134121	0.244786	DNAH7	2	195737703	196068812	-	21324	protein_coding	dynein axonemal heavy chain 7 [Source:HGNC Symbol;Acc:HGNC:18661]	-	1	12	0.00270587	0.0274793
ENSG00000253930	-3.13701	8.797	0.0134121	0.244786	TNFRSF10A-AS1	8	23189279	23190675	+	637	antisense	TNFRSF10A antisense RNA 1 [Source:HGNC Symbol;Acc:HGNC:53164]	-	1	12	0.0905807	0.919887
ENSG00000186684	-3.13701	8.797	0.0134121	0.244786	CYP27C1	2	127184120	127220078	-	4491	protein_coding	cytochrome P450 family 27 subfamily C member 1 [Source:HGNC Symbol;Acc:HGNC:33480]	-	1	12	0.0128479	0.130476
ENSG00000228925	-3.13701	8.797	0.0134121	0.244786	AC016722.2	2	46899275	46908678	+	1835	antisense	novel transcript, antisense to MCFD2	-	1	12	0.0314441	0.319329
ENSG00000157306	3.46279	11.0256	0.0134121	0.244786	ZFHX2-AS1	14	23511760	23560778	+	5097	processed_transcript	ZFHX2 antisense RNA 1 [Source:HGNC Symbol;Acc:HGNC:52658]	-	10	1	0.113204	0.00958028
ENSG00000260735	3.46279	11.0256	0.0134121	0.244786	AC139256.1	16	15094411	15109197	+	2598	transcribed_processed_pseudogene	uncharacterized LOC100505915 [Source:NCBI gene;Acc:100505915]	-	10	1	0.222093	0.0187955
ENSG00000167664	-3.13701	8.797	0.0134121	0.244786	TMIGD2	19	4292232	4302431	-	1262	protein_coding	transmembrane and immunoglobulin domain containing 2 [Source:HGNC Symbol;Acc:HGNC:28324]	-	1	12	0.045721	0.464317
ENSG00000277728	3.46279	11.0256	0.0134121	0.244786	AC097641.2	17	73202968	73203431	-	464	antisense	novel transcript, antisense to COG1	-	10	1	1.24353	0.105239
ENSG00000171189	-3.13701	8.797	0.0134121	0.244786	GRIK1	21	29536933	29940033	-	4242	protein_coding	glutamate ionotropic receptor kainate type subunit 1 [Source:HGNC Symbol;Acc:HGNC:4579]	-	1	12	0.013602	0.138135
ENSG00000187997	-3.13701	8.797	0.0134121	0.244786	C17orf99	17	78146353	78166177	+	2763	protein_coding	chromosome 17 open reading frame 99 [Source:HGNC Symbol;Acc:HGNC:34490]	-	1	12	0.0208831	0.212077
ENSG00000229740	3.46279	11.0256	0.0134121	0.244786	U91324.1	2	8139402	8143269	+	447	lincRNA	novel transcript	-	10	1	1.29083	0.109241
ENSG00000196873	1.12616	2.18278	0.0134609	0.245484	CBWD3	9	68232003	68300015	+	12319	protein_coding	COBW domain containing 3 [Source:HGNC Symbol;Acc:HGNC:18519]	-	183	104	0.857138	0.412241
ENSG00000228253	1.03152	2.04417	0.0135027	0.246054	MT-ATP8	MT	8366	8572	+	207	protein_coding	mitochondrially encoded ATP synthase membrane subunit 8 [Source:HGNC Symbol;Acc:HGNC:7415]	-	2126	1291	592.608	304.543
ENSG00000189227	1.09311	2.13333	0.0135343	0.246436	C15orf61	15	67521068	67530143	+	4811	protein_coding	chromosome 15 open reading frame 61 [Source:HGNC Symbol;Acc:HGNC:34453]	-	239	139	2.8664	1.41082
ENSG00000072657	-1.0991	2.14221	0.0135506	0.246539	TRHDE	12	72087266	72670757	+	11950	protein_coding	thyrotropin releasing hormone degrading enzyme [Source:HGNC Symbol;Acc:HGNC:30748]	-	112	298	0.540785	1.2177
ENSG00000182463	-1.28721	2.44055	0.0135821	0.24692	TSHZ2	20	52972407	53495330	+	12581	protein_coding	teashirt zinc finger homeobox 2 [Source:HGNC Symbol;Acc:HGNC:13010]	Others	27	82	0.123829	0.318267
ENSG00000105971	-1.06081	2.0861	0.0136211	0.247367	CAV2	7	116287380	116508541	+	6926	protein_coding	caveolin 2 [Source:HGNC Symbol;Acc:HGNC:1528]	-	227	588	1.89112	4.1456
ENSG00000137955	1.02686	2.03758	0.013628	0.247367	RABGGTB	1	75786197	75795079	+	5913	protein_coding	Rab geranylgeranyltransferase subunit beta [Source:HGNC Symbol;Acc:HGNC:9796]	-	3557	2167	34.7097	17.8955
ENSG00000188153	-1.03789	2.05322	0.0136457	0.247496	COL4A5	X	108439844	108697545	+	11865	protein_coding	collagen type IV alpha 5 chain [Source:HGNC Symbol;Acc:HGNC:2207]	-	550	1402	2.67467	5.76996
ENSG00000164307	-1.03191	2.04473	0.0136964	0.247601	ERAP1	5	96760810	96808100	-	7945	protein_coding	endoplasmic reticulum aminopeptidase 1 [Source:HGNC Symbol;Acc:HGNC:18173]	-	806	2046	5.85351	12.5749
ENSG00000116885	-1.63534	3.10661	0.013705	0.247601	OSCP1	1	36415827	36450451	-	2788	protein_coding	organic solute carrier partner 1 [Source:HGNC Symbol;Acc:HGNC:29971]	-	9	35	0.186262	0.613011
ENSG00000230982	1.69799	3.24448	0.013705	0.247601	DSTNP1	21	46653558	46654022	-	465	processed_pseudogene	destrin, actin depolymerizing factor pseudogene 1 [Source:HGNC Symbol;Acc:HGNC:23769]	-	29	11	3.59849	1.15513
ENSG00000178826	-1.63534	3.10661	0.013705	0.247601	TMEM139	7	143279957	143288048	+	2564	protein_coding	transmembrane protein 139 [Source:HGNC Symbol;Acc:HGNC:22058]	-	9	35	0.202535	0.666566
ENSG00000156219	1.69799	3.24448	0.013705	0.247601	ART3	4	76011184	76112802	+	3278	protein_coding	ADP-ribosyltransferase 3 [Source:HGNC Symbol;Acc:HGNC:725]	-	29	11	0.510463	0.163861
ENSG00000139178	-1.03791	2.05325	0.0137154	0.247601	C1RL	12	7089587	7109273	-	5014	protein_coding	complement C1r subcomponent like [Source:HGNC Symbol;Acc:HGNC:21265]	-	570	1453	6.55942	14.1506
ENSG00000115841	1.19349	2.28706	0.0137433	0.247912	RMDN2	2	37923187	38067142	+	5999	protein_coding	regulator of microtubule dynamics 2 [Source:HGNC Symbol;Acc:HGNC:26567]	-	107	58	1.02915	0.472109
ENSG00000166741	-1.06206	2.08791	0.0137779	0.248261	NNMT	11	114257787	114313285	+	2919	protein_coding	nicotinamide N-methyltransferase [Source:HGNC Symbol;Acc:HGNC:7861]	-	216	560	4.26967	9.368
ENSG00000102890	1.17139	2.25228	0.0137854	0.248261	ELMO3	16	67199111	67204029	+	2575	protein_coding	engulfment and cell motility 3 [Source:HGNC Symbol;Acc:HGNC:17289]	-	109	60	2.44244	1.1378
ENSG00000128242	-1.03964	2.05572	0.0137947	0.248261	GAL3ST1	22	30554635	30574587	-	3017	protein_coding	galactose-3-O-sulfotransferase 1 [Source:HGNC Symbol;Acc:HGNC:24240]	-	469	1197	8.96959	19.3737
ENSG00000143869	-1.11311	2.16311	0.0138129	0.248397	GDF7	2	20666664	20679245	+	9749	protein_coding	growth differentiation factor 7 [Source:HGNC Symbol;Acc:HGNC:4222]	-	99	266	0.585936	1.33234
ENSG00000137876	1.02355	2.03292	0.0138308	0.248461	RSL24D1	15	55180806	55197067	-	3009	protein_coding	ribosomal L24 domain containing 1 [Source:HGNC Symbol;Acc:HGNC:18479]	-	4556	2782	87.3648	45.1469
ENSG00000138823	-1.02102	2.02935	0.0138378	0.248461	MTTP	4	99563761	99623999	+	5398	protein_coding	microsomal triglyceride transfer protein [Source:HGNC Symbol;Acc:HGNC:7467]	-	6897	17375	73.7229	157.175
ENSG00000160124	1.03657	2.05135	0.0138985	0.248796	CCDC58	3	122359591	122383231	-	1746	protein_coding	coiled-coil domain containing 58 [Source:HGNC Symbol;Acc:HGNC:31136]	-	1023	619	33.807	17.3117
ENSG00000185238	1.05297	2.0748	0.0138993	0.248796	PRMT3	11	20387530	20509294	+	5467	protein_coding	protein arginine methyltransferase 3 [Source:HGNC Symbol;Acc:HGNC:30163]	-	550	329	5.80482	2.93859
ENSG00000148291	1.06761	2.09596	0.0139092	0.248796	SURF2	9	133356552	133361169	+	1008	protein_coding	surfeit 2 [Source:HGNC Symbol;Acc:HGNC:11475]	-	353	209	20.2064	10.1246
ENSG00000156453	-1.40208	2.64281	0.01391	0.248796	PCDH1	5	141853111	141879246	-	5903	protein_coding	protocadherin 1 [Source:HGNC Symbol;Acc:HGNC:8655]	-	17	56	0.166169	0.463242
ENSG00000168427	1.4372	2.70795	0.01391	0.248796	KLHL30	2	238138722	238152947	+	3726	protein_coding	kelch like family member 30 [Source:HGNC Symbol;Acc:HGNC:24770]	-	46	21	0.712344	0.275213
ENSG00000162614	-1.2858	2.43817	0.0139261	0.248893	NEXN	1	77888513	77943895	+	4436	protein_coding	nexilin F-actin binding protein [Source:HGNC Symbol;Acc:HGNC:29557]	-	30	91	0.390216	1.00171
ENSG00000166825	-1.02213	2.03092	0.0139573	0.249258	ANPEP	15	89784889	89815401	-	4871	protein_coding	alanyl aminopeptidase, membrane [Source:HGNC Symbol;Acc:HGNC:500]	-	2406	6066	28.5005	60.8103
ENSG00000141994	1.03489	2.04896	0.0139814	0.249498	DUS3L	19	5784832	5791238	-	3642	protein_coding	dihydrouridine synthase 3 like [Source:HGNC Symbol;Acc:HGNC:26920]	-	1002	607	15.8746	8.13845
ENSG00000158406	1.27147	2.41408	0.0139994	0.249627	HIST1H4H	6	26277609	26285638	-	2163	protein_coding	histone cluster 1 H4 family member h [Source:HGNC Symbol;Acc:HGNC:4788]	-	76	39	2.02737	0.880442
ENSG00000261236	1.02671	2.03737	0.014022	0.249839	BOP1	8	144262102	144291370	-	3716	protein_coding	block of proliferation 1 [Source:HGNC Symbol;Acc:HGNC:15519]	-	1899	1157	29.4866	15.2037
ENSG00000234327	1.17493	2.25782	0.0140405	0.249977	AC012146.1	17	5111468	5115004	+	2006	processed_transcript	uncharacterized LOC101928000 [Source:NCBI gene;Acc:101928000]	-	122	67	3.50917	1.63094
ENSG00000116183	-1.39524	2.63033	0.0140899	0.250665	PAPPA2	1	176463171	176845605	+	10930	protein_coding	pappalysin 2 [Source:HGNC Symbol;Acc:HGNC:14615]	-	18	59	0.0950227	0.263587
ENSG00000162415	-1.05652	2.07991	0.0141343	0.251092	ZSWIM5	1	45016399	45306209	-	6046	protein_coding	zinc finger SWIM-type containing 5 [Source:HGNC Symbol;Acc:HGNC:29299]	-	230	594	2.195	4.79746
ENSG00000133624	1.10502	2.15102	0.0141424	0.251092	ZNF767P	7	149547154	149624752	-	4012	transcribed_unprocessed_pseudogene	zinc finger family member 767, pseudogene [Source:HGNC Symbol;Acc:HGNC:21884]	-	189	109	2.71816	1.32666
ENSG00000185818	1.04416	2.06217	0.0141569	0.251092	NAT8L	4	2059512	2069089	+	5871	protein_coding	N-acetyltransferase 8 like [Source:HGNC Symbol;Acc:HGNC:26742]	-	643	387	6.31937	3.21878
ENSG00000115252	-1.6033	3.03837	0.0141787	0.251092	PDE1A	2	182140036	182523192	-	6322	protein_coding	phosphodiesterase 1A [Source:HGNC Symbol;Acc:HGNC:8774]	-	10	38	0.0912684	0.293509
ENSG00000198569	-1.56497	2.95871	0.0141787	0.251092	SLC34A3	9	137230757	137236554	+	2303	protein_coding	solute carrier family 34 member 3 [Source:HGNC Symbol;Acc:HGNC:20305]	-	10	37	0.250542	0.784514
ENSG00000267372	-1.56497	2.95871	0.0141787	0.251092	AC005330.1	19	1321225	1322846	+	1238	lincRNA	novel transcript	-	10	37	0.466073	1.4594
ENSG00000135763	1.04112	2.05783	0.0142349	0.251894	URB2	1	229626234	229660199	+	6001	protein_coding	URB2 ribosome biogenesis 2 homolog (S. cerevisiae) [Source:HGNC Symbol;Acc:HGNC:28967]	-	761	459	7.31705	3.73493
ENSG00000122870	-1.0182	2.0254	0.0142984	0.252827	BICC1	10	58513140	58831437	+	6569	protein_coding	BicC family RNA binding protein 1 [Source:HGNC Symbol;Acc:HGNC:19351]	-	2580	6487	22.6619	48.2211
ENSG00000230979	1.87629	3.6713	0.0143802	0.253626	AC079250.1	2	47690716	47691246	-	531	processed_pseudogene	ribosomal protein L18a (RPL18A) pseudogene	-	21	7	2.28192	0.643719
ENSG00000234329	1.87629	3.6713	0.0143802	0.253626	AL604028.2	1	45651039	45651826	-	788	processed_pseudogene	ribosomal protein L7a (RPL7A) pseudogene	-	21	7	1.53769	0.433775
ENSG00000168273	1.21437	2.3204	0.0144083	0.253626	SMIM4	3	52534013	52579237	+	2482	protein_coding	small integral membrane protein 4 [Source:HGNC Symbol;Acc:HGNC:37257]	-	88	47	2.04577	0.924675
ENSG00000274979	1.1301	2.18873	0.0144429	0.253626	AC020656.2	12	69326574	69331882	-	5309	lincRNA	novel transcript	-	150	85	1.63025	0.781806
ENSG00000008256	-1.07036	2.09996	0.0144717	0.253626	CYTH3	7	6161776	6272644	-	5808	protein_coding	cytohesin 3 [Source:HGNC Symbol;Acc:HGNC:9504]	-	153	399	1.51999	3.35459
ENSG00000111700	2.18043	4.53288	0.0144854	0.253626	SLCO1B3	12	20810702	20916911	+	3542	protein_coding	solute carrier organic anion transporter family member 1B3 [Source:HGNC Symbol;Acc:HGNC:10961]	-	15	4	0.244353	0.0551448
ENSG00000253366	2.18043	4.53288	0.0144854	0.253626	AC139272.1	5	70751184	70795914	+	640	unprocessed_pseudogene	glucuronidase, beta (GUSB) pseudogene	-	15	4	1.35234	0.305192
ENSG00000280332	2.18043	4.53288	0.0144854	0.253626	AC020917.4	19	16356329	16358327	-	1999	TEC	TEC	-	15	4	0.432966	0.0977102
ENSG00000274528	2.18043	4.53288	0.0144854	0.253626	AC090970.2	15	52017167	52018032	-	866	sense_intronic	novel transcript	-	15	4	0.999421	0.225546
ENSG00000162551	2.18043	4.53288	0.0144854	0.253626	ALPL	1	21509372	21578412	+	3007	protein_coding	alkaline phosphatase, liver/bone/kidney [Source:HGNC Symbol;Acc:HGNC:438]	-	15	4	0.287828	0.064956
ENSG00000163806	2.18043	4.53288	0.0144854	0.253626	SPDYA	2	28782517	28850611	+	3483	protein_coding	speedy/RINGO cell cycle regulator family member A [Source:HGNC Symbol;Acc:HGNC:30613]	-	15	4	0.248492	0.0560789
ENSG00000231125	2.18043	4.53288	0.0144854	0.253626	AF129075.1	21	29058073	29060095	-	794	sense_intronic	novel transcript, sense intronic to CCT8	-	15	4	1.09005	0.245998
ENSG00000227619	2.18043	4.53288	0.0144854	0.253626	AL391056.1	9	129575409	129584556	+	2449	lincRNA	novel transcript (FLJ20378)	-	15	4	0.353409	0.0797561
ENSG00000145248	1.53965	2.90725	0.0145837	0.254963	SLC10A4	4	48483343	48489196	+	1790	protein_coding	solute carrier family 10 member 4 [Source:HGNC Symbol;Acc:HGNC:22980]	-	33	14	1.06374	0.381916
ENSG00000278864	1.53965	2.90725	0.0145837	0.254963	AC055811.4	17	17181504	17183257	+	1754	TEC	novel transcript	-	33	14	1.08557	0.389755
ENSG00000102760	1.18183	2.26865	0.0146187	0.255238	RGCC	13	41457559	41470882	+	1032	protein_coding	regulator of cell cycle [Source:HGNC Symbol;Acc:HGNC:20369]	-	97	53	5.42334	2.50778
ENSG00000237973	1.02799	2.03918	0.0146242	0.255238	MTCO1P12	1	631074	632616	+	1543	unprocessed_pseudogene	MT-CO1 pseudogene 12 [Source:HGNC Symbol;Acc:HGNC:52014]	-	1035	630	38.7034	19.9374
ENSG00000142534	1.01181	2.01644	0.0146324	0.255238	RPS11	19	49496365	49499689	+	1390	protein_coding	ribosomal protein S11 [Source:HGNC Symbol;Acc:HGNC:10384]	-	28899	17791	1199.62	624.998
ENSG00000229152	1.18434	2.2726	0.0146548	0.255438	ANKRD10-IT1	13	110894639	110899172	-	800	sense_intronic	ANKRD10 intronic transcript 1 [Source:HGNC Symbol;Acc:HGNC:39891]	-	99	54	7.14036	3.29607
ENSG00000230487	-1.08181	2.11669	0.0147028	0.256082	PSMG3-AS1	7	1570073	1589626	+	6355	lincRNA	PSMG3 antisense RNA 1 (head to head) [Source:HGNC Symbol;Acc:HGNC:22230]	-	132	347	1.19849	2.66629
ENSG00000182004	1.01637	2.02282	0.0147462	0.256506	SNRPE	1	203861603	203870550	+	1474	protein_coding	small nuclear ribonucleoprotein polypeptide E [Source:HGNC Symbol;Acc:HGNC:11161]	-	2679	1644	104.87	54.4625
ENSG00000137869	-1.10628	2.1529	0.0147492	0.256506	CYP19A1	15	51208057	51338610	-	8437	protein_coding	cytochrome P450 family 19 subfamily A member 1 [Source:HGNC Symbol;Acc:HGNC:2594]	-	86	230	0.588146	1.33117
ENSG00000169231	-1.18683	2.27652	0.0148119	0.257404	THBS3	1	155195588	155209051	-	4623	protein_coding	thrombospondin 3 [Source:HGNC Symbol;Acc:HGNC:11787]	-	47	133	0.586609	1.40482
ENSG00000132661	1.02355	2.03291	0.0148442	0.257772	NXT1	20	23350736	23354777	+	1123	protein_coding	nuclear transport factor 2 like export factor 1 [Source:HGNC Symbol;Acc:HGNC:15913]	-	1153	704	59.2413	30.6116
ENSG00000171992	-1.02916	2.04084	0.0149088	0.2587	SYNPO	5	150601080	150659220	+	10258	protein_coding	synaptopodin [Source:HGNC Symbol;Acc:HGNC:30672]	-	459	1163	2.58181	5.53618
ENSG00000138061	-1.61113	3.05492	0.014931	0.258701	CYP1B1	2	38066973	38109902	-	6014	protein_coding	cytochrome P450 family 1 subfamily B member 1 [Source:HGNC Symbol;Acc:HGNC:2597]	-	11	42	0.105537	0.341019
ENSG00000169515	-1.61113	3.05492	0.014931	0.258701	CCDC8	19	46410329	46413662	-	3334	protein_coding	coiled-coil domain containing 8 [Source:HGNC Symbol;Acc:HGNC:25367]	-	11	42	0.190372	0.615144
ENSG00000204856	1.0309	2.0433	0.0150134	0.259864	FAM216A	12	110468364	110490385	+	2753	protein_coding	family with sequence similarity 216 member A [Source:HGNC Symbol;Acc:HGNC:30180]	-	726	441	15.2162	7.82213
ENSG00000261505	1.15602	2.22842	0.0150205	0.259864	AL031714.1	16	1317891	1322845	-	4489	antisense	novel transcript, antisense to UBE2I	-	124	69	1.59385	0.750572
ENSG00000147872	-1.00792	2.01102	0.0150736	0.260589	PLIN2	9	19108375	19149290	-	5086	protein_coding	perilipin 2 [Source:HGNC Symbol;Acc:HGNC:248]	-	7191	17952	81.5808	172.357
ENSG00000231925	-1.01536	2.02141	0.0151929	0.262455	TAPBP	6	33299694	33314387	-	5056	protein_coding	TAP binding protein [Source:HGNC Symbol;Acc:HGNC:11566]	-	895	2246	10.2139	21.6918
ENSG00000166750	-1.55371	2.93571	0.0152297	0.262702	SLFN5	17	35243036	35273655	+	10709	protein_coding	schlafen family member 5 [Source:HGNC Symbol;Acc:HGNC:28286]	-	12	44	0.0646558	0.20063
ENSG00000100206	-1.55371	2.93571	0.0152297	0.262702	DMC1	22	38518949	38570286	-	3524	protein_coding	DNA meiotic recombinase 1 [Source:HGNC Symbol;Acc:HGNC:2927]	-	12	44	0.196481	0.609691
ENSG00000226221	1.05653	2.07992	0.0152902	0.262837	RPL26P19	5	56504635	56505072	-	438	processed_pseudogene	ribosomal protein L26 pseudogene 19 [Source:HGNC Symbol;Acc:HGNC:36393]	-	357	213	47.0294	23.7464
ENSG00000100593	-1.89099	3.7089	0.0153054	0.262837	ISM2	14	77474394	77498850	-	4131	protein_coding	isthmin 2 [Source:HGNC Symbol;Acc:HGNC:23176]	-	6	28	0.0838052	0.330975
ENSG00000107611	-1.89099	3.7089	0.0153054	0.262837	CUBN	10	16823966	17129817	-	13270	protein_coding	cubilin [Source:HGNC Symbol;Acc:HGNC:2548]	-	6	28	0.0260889	0.103034
ENSG00000165646	1.81773	3.52526	0.0153054	0.262837	SLC18A2	10	117241073	117279430	+	4145	protein_coding	solute carrier family 18 member A2 [Source:HGNC Symbol;Acc:HGNC:10935]	-	23	8	0.320168	0.094245
ENSG00000280587	1.81773	3.52526	0.0153054	0.262837	LINC01348	1	235065479	235074220	-	3262	lincRNA	long intergenic non-protein coding RNA 1348 [Source:HGNC Symbol;Acc:HGNC:50567]	-	23	8	0.406835	0.119756
ENSG00000270460	-1.89099	3.7089	0.0153054	0.262837	AC106900.2	2	173811076	173811392	+	317	lincRNA	novel transcript	-	6	28	1.09211	4.31312
ENSG00000100902	1.10014	2.14376	0.0153737	0.263815	PSMA6	14	35278633	35317493	+	6506	protein_coding	proteasome subunit alpha 6 [Source:HGNC Symbol;Acc:HGNC:9535]	-	178	103	1.57863	0.773065
ENSG00000188130	1.01154	2.01606	0.0154725	0.265166	MAPK12	22	50245450	50261825	-	9424	protein_coding	mitogen-activated protein kinase 12 [Source:HGNC Symbol;Acc:HGNC:6874]	-	1897	1168	11.6147	6.05202
ENSG00000166313	-1.03681	2.05168	0.0154752	0.265166	APBB1	11	6395124	6419414	-	5244	protein_coding	amyloid beta precursor protein binding family B member 1 [Source:HGNC Symbol;Acc:HGNC:581]	-	274	698	3.01483	6.49958
ENSG00000278023	-1.50319	2.83468	0.0154873	0.265177	RDM1	17	35918066	35930773	-	1975	protein_coding	RAD52 motif containing 1 [Source:HGNC Symbol;Acc:HGNC:19950]	-	13	46	0.379797	1.13732
ENSG00000240087	1.25391	2.38486	0.0155099	0.265368	RPSAP12	12	68552995	68553882	-	888	processed_pseudogene	ribosomal protein SA pseudogene 12 [Source:HGNC Symbol;Acc:HGNC:6504]	-	77	40	5.00326	2.19958
ENSG00000166833	-1.00894	2.01243	0.0155981	0.266682	NAV2	11	19350724	20121598	+	14673	protein_coding	neuron navigator 2 [Source:HGNC Symbol;Acc:HGNC:15997]	-	1180	2948	4.64021	9.81073
ENSG00000137818	1.00141	2.00195	0.0156565	0.267484	RPLP1	15	69452784	69456194	+	3271	protein_coding	ribosomal protein lateral stalk subunit P1 [Source:HGNC Symbol;Acc:HGNC:10372]	-	30933	19181	545.653	286.341
ENSG00000160606	1.03395	2.04762	0.0156984	0.267825	TLCD1	17	28724348	28727935	-	1311	protein_coding	TLC domain containing 1 [Source:HGNC Symbol;Acc:HGNC:25177]	-	523	317	23.0183	11.8073
ENSG00000213713	-1.48803	2.80506	0.0157099	0.267825	PIGCP1	11	33075566	33076460	-	895	processed_pseudogene	phosphatidylinositol glycan anchor biosynthesis class C pseudogene 1 [Source:HGNC Symbol;Acc:HGNC:8961]	-	14	49	0.902568	2.67341
ENSG00000102359	-1.231	2.34729	0.0157111	0.267825	SRPX2	X	100644166	100675788	+	7548	protein_coding	sushi repeat containing protein X-linked 2 [Source:HGNC Symbol;Acc:HGNC:30668]	-	37	108	0.282843	0.69869
ENSG00000145321	-1.00388	2.00539	0.0158108	0.269327	GC	4	71741693	71804041	-	2381	protein_coding	GC, vitamin D binding protein [Source:HGNC Symbol;Acc:HGNC:4187]	-	1957	4872	47.4249	99.9173
ENSG00000186395	1.01535	2.0214	0.0158596	0.269962	KRT10	17	40818117	40822595	-	2144	protein_coding	keratin 10 [Source:HGNC Symbol;Acc:HGNC:6413]	-	1039	638	27.9618	14.5308
ENSG00000126878	1.44969	2.73149	0.0159028	0.270498	AIF1L	9	131096476	131123152	+	5299	protein_coding	allograft inflammatory factor 1 like [Source:HGNC Symbol;Acc:HGNC:28904]	-	42	19	0.457331	0.175086
ENSG00000117016	-1.16955	2.24942	0.0159377	0.270894	RIMS3	1	40620679	40665657	-	7235	protein_coding	regulating synaptic membrane exocytosis 3 [Source:HGNC Symbol;Acc:HGNC:21292]	-	49	137	0.39078	0.924645
ENSG00000107669	-1.00372	2.00517	0.0159541	0.270974	ATE1	10	121740421	121928801	-	5720	protein_coding	arginyltransferase 1 [Source:HGNC Symbol;Acc:HGNC:782]	-	1537	3826	15.5043	32.6619
ENSG00000253552	-1.12963	2.18803	0.0160465	0.272345	HOXA-AS2	7	27107777	27134302	+	5281	antisense	HOXA cluster antisense RNA 2 [Source:HGNC Symbol;Acc:HGNC:43745]	-	64	174	0.69926	1.60889
ENSG00000188060	-1.10914	2.15717	0.0160725	0.272588	RAB42	1	28592200	28595443	+	2200	protein_coding	RAB42, member RAS oncogene family [Source:HGNC Symbol;Acc:HGNC:28702]	-	75	201	1.96704	4.46135
ENSG00000230623	-1.03923	2.05513	0.0162792	0.275891	AC104461.1	1	200333193	200478360	+	3344	processed_transcript	novel transcript, antisense to ZNF281	-	212	541	3.65801	7.89994
ENSG00000269867	1.33773	2.52754	0.0163423	0.276357	AC010326.3	19	57867038	57868172	-	679	sense_intronic	novel transcript, sense intronic to ZNF814	-	47	23	3.99395	1.65406
ENSG00000206754	1.33773	2.52754	0.0163423	0.276357	SNORD101	6	132815307	132815379	+	73	snoRNA	small nucleolar RNA, C/D box 101 [Source:HGNC Symbol;Acc:HGNC:32764]	-	47	23	37.1492	15.385
ENSG00000284946	1.05147	2.07264	0.0164582	0.278095	AC068831.7	15	90966190	91022566	-	7148	protein_coding	novel transcript	-	309	185	2.4943	1.2638
ENSG00000153406	1.96063	3.89232	0.0164929	0.278095	NMRAL1	16	4461680	4495763	-	3541	protein_coding	NmrA like redox sensor 1 [Source:HGNC Symbol;Acc:HGNC:24987]	-	16	5	0.260717	0.0689504
ENSG00000242173	-2.38231	5.2137	0.0164929	0.278095	ARHGDIG	16	268727	283010	+	2429	protein_coding	Rho GDP dissociation inhibitor gamma [Source:HGNC Symbol;Acc:HGNC:680]	-	3	20	0.0712637	0.402064
ENSG00000221539	1.96063	3.89232	0.0164929	0.278095	SNORD99	1	28578749	28578822	-	74	snoRNA	small nucleolar RNA, C/D box 99 [Source:HGNC Symbol;Acc:HGNC:32762]	-	16	5	12.4756	3.29937
ENSG00000269821	1.05874	2.0831	0.0165234	0.278407	KCNQ1OT1	11	2608328	2699994	-	91667	antisense	KCNQ1 opposite strand/antisense transcript 1 [Source:HGNC Symbol;Acc:HGNC:6295]	-	277	165	0.174358	0.0878949
ENSG00000138640	-1.00237	2.00328	0.0165848	0.27924	FAM13A	4	88725955	89111398	-	13215	protein_coding	family with sequence similarity 13 member A [Source:HGNC Symbol;Acc:HGNC:19367]	-	846	2104	3.69384	7.77448
ENSG00000170381	-1.67431	3.19166	0.0166546	0.279808	SEMA3E	7	83363238	83649113	-	8424	protein_coding	semaphorin 3E [Source:HGNC Symbol;Acc:HGNC:10727]	-	8	32	0.0547957	0.185492
ENSG00000275152	-1.67431	3.19166	0.0166546	0.279808	CCL16	17	35976493	35981496	-	1744	protein_coding	C-C motif chemokine ligand 16 [Source:HGNC Symbol;Acc:HGNC:10614]	-	8	32	0.264678	0.895976
ENSG00000124212	-1.08243	2.11761	0.0167454	0.280927	PTGIS	20	49503874	49568146	-	5579	protein_coding	prostaglandin I2 synthase [Source:HGNC Symbol;Acc:HGNC:9603]	-	92	242	0.951495	2.11813
ENSG00000136859	-1.33274	2.51881	0.0167701	0.281138	ANGPTL2	9	127087332	127122883	-	3889	protein_coding	angiopoietin like 2 [Source:HGNC Symbol;Acc:HGNC:490]	-	22	69	0.326407	0.866371
ENSG00000180667	1.00937	2.01304	0.0167834	0.281159	YOD1	1	207043849	207052980	-	6521	protein_coding	YOD1 deubiquitinase [Source:HGNC Symbol;Acc:HGNC:25035]	-	892	550	7.8927	4.11852
ENSG00000171444	1.01411	2.01966	0.0168062	0.281338	MCC	5	113022099	113488830	-	10746	protein_coding	MCC, WNT signaling pathway regulator [Source:HGNC Symbol;Acc:HGNC:6935]	-	742	456	3.98412	2.0721
ENSG00000198498	1.02801	2.0392	0.0168841	0.282236	TMA16	4	163494442	163520539	+	3513	protein_coding	translation machinery associated 16 homolog [Source:HGNC Symbol;Acc:HGNC:25638]	-	442	269	7.25971	3.7391
ENSG00000155085	-1.26926	2.41037	0.0169166	0.282543	AK9	6	109492856	109691217	-	10098	protein_coding	adenylate kinase 9 [Source:HGNC Symbol;Acc:HGNC:33814]	-	25	75	0.14285	0.362676
ENSG00000104044	-1.05531	2.07816	0.0169846	0.282951	OCA2	15	27754875	28099358	-	3299	protein_coding	OCA2 melanosomal transmembrane protein [Source:HGNC Symbol;Acc:HGNC:8101]	-	136	351	2.37866	5.19538
ENSG00000235453	1.24346	2.36766	0.0169848	0.282951	SMIM27	9	32551144	32568621	+	3827	protein_coding	small integral membrane protein 27 [Source:HGNC Symbol;Acc:HGNC:31420]	-	65	34	0.980008	0.433824
ENSG00000154265	-1.03582	2.05028	0.0169893	0.282951	ABCA5	17	69244311	69327244	-	13158	protein_coding	ATP binding cassette subfamily A member 5 [Source:HGNC Symbol;Acc:HGNC:35]	-	196	499	0.859491	1.85184
ENSG00000198720	1.1234	2.1786	0.0170084	0.282951	ANKRD13B	17	29589769	29614761	+	3971	protein_coding	ankyrin repeat domain 13B [Source:HGNC Symbol;Acc:HGNC:26363]	-	130	74	1.88894	0.909965
ENSG00000131503	1.24545	2.37093	0.0170121	0.282951	ANKHD1	5	140401814	140539856	+	11124	protein_coding	ankyrin repeat and KH domain containing 1 [Source:HGNC Symbol;Acc:HGNC:24714]	-	67	35	0.347527	0.153638
ENSG00000132003	-1.1435	2.20916	0.0170385	0.283187	ZSWIM4	19	13795460	13832230	+	4713	protein_coding	zinc finger SWIM-type containing 4 [Source:HGNC Symbol;Acc:HGNC:25704]	-	55	151	0.673349	1.56449
ENSG00000232442	1.22868	2.34353	0.0170555	0.283268	MHENCR	20	63627227	63628824	+	801	antisense	melanoma highly expressed competing endogenous lncRNA for miR-425 and miR-489 [Source:HGNC Symbol;Acc:HGNC:53110]	-	70	37	5.04244	2.2556
ENSG00000178685	-1.18805	2.27845	0.0171262	0.28391	PARP10	8	143977153	144012772	-	6033	protein_coding	poly(ADP-ribose) polymerase family member 10 [Source:HGNC Symbol;Acc:HGNC:25895]	-	36	102	0.344306	0.825581
ENSG00000166924	-1.59369	3.0182	0.017143	0.28391	NYAP1	7	100483927	100494799	+	3586	protein_coding	neuronal tyrosine phosphorylated phosphoinositide-3-kinase adaptor 1 [Source:HGNC Symbol;Acc:HGNC:22009]	-	9	34	0.144813	0.462979
ENSG00000263235	1.64756	3.13303	0.017143	0.28391	AC006111.2	16	3650636	3651703	-	1068	sense_overlapping	novel transcript, sense overlapping TRAP1	-	28	11	1.51273	0.502938
ENSG00000170775	-1.04707	2.06632	0.0174749	0.288615	GPR37	7	124745997	124765627	-	3021	protein_coding	G protein-coupled receptor 37 [Source:HGNC Symbol;Acc:HGNC:4494]	-	136	349	2.59755	5.64115
ENSG00000150456	1.07351	2.10455	0.0174767	0.288615	EEF1AKMT1	13	20728731	20773958	-	1339	protein_coding	EEF1A lysine methyltransferase 1 [Source:HGNC Symbol;Acc:HGNC:27351]	-	190	112	8.18744	4.08442
ENSG00000162650	1.04829	2.06807	0.0175161	0.288823	ATXN7L2	1	109483479	109492804	+	5232	protein_coding	ataxin 7 like 2 [Source:HGNC Symbol;Acc:HGNC:28713]	-	275	165	3.03277	1.53996
ENSG00000112299	-1.52559	2.87904	0.0175391	0.288823	VNN1	6	132681590	132714049	-	3106	protein_coding	vanin 1 [Source:HGNC Symbol;Acc:HGNC:12705]	-	10	36	0.185769	0.565971
ENSG00000219682	1.50846	2.84507	0.0175391	0.288823	AL133268.1	6	25140003	25141403	+	1401	processed_pseudogene	nucleoporin 50kD (NUP50) pseudogene	-	30	13	1.23554	0.453104
ENSG00000230701	1.50846	2.84507	0.0175391	0.288823	FBXW4P1	22	23262767	23265005	+	2239	processed_pseudogene	F-box and WD repeat domain containing 4 pseudogene 1 [Source:HGNC Symbol;Acc:HGNC:13609]	-	30	13	0.773111	0.283519
ENSG00000124802	1.03261	2.04572	0.017647	0.289229	EEF1E1	6	8073360	8102578	-	2107	protein_coding	eukaryotic translation elongation factor 1 epsilon 1 [Source:HGNC Symbol;Acc:HGNC:3212]	-	333	202	9.11916	4.68144
ENSG00000167799	1.03236	2.04537	0.0176767	0.289229	NUDT8	11	67627938	67629930	-	1475	protein_coding	nudix hydrolase 8 [Source:HGNC Symbol;Acc:HGNC:8055]	-	328	199	12.8309	6.58801
ENSG00000049089	-1.00115	2.00159	0.0177768	0.289229	COL9A2	1	40300487	40317813	-	4217	protein_coding	collagen type IX alpha 2 chain [Source:HGNC Symbol;Acc:HGNC:2218]	-	435	1081	5.95197	12.5174
ENSG00000103037	1.04049	2.05693	0.0178171	0.289229	SETD6	16	58515479	58521181	+	5078	protein_coding	SET domain containing 6 [Source:HGNC Symbol;Acc:HGNC:26116]	-	305	184	3.46563	1.76937
ENSG00000102053	1.49541	2.81945	0.0178604	0.289229	ZC3H12B	X	65366638	65507887	+	7829	protein_coding	zinc finger CCCH-type containing 12B [Source:HGNC Symbol;Acc:HGNC:17407]	-	32	14	0.235841	0.0873202
ENSG00000236264	1.49541	2.81945	0.0178604	0.289229	RPL26P30	11	2335135	2347685	-	1178	transcribed_processed_pseudogene	ribosomal protein L26 pseudogene 30 [Source:HGNC Symbol;Acc:HGNC:36733]	-	32	14	1.5674	0.580331
ENSG00000150510	-2.43131	5.39384	0.0178622	0.289229	FAM124A	13	51222334	51284241	+	6702	protein_coding	family with sequence similarity 124 member A [Source:HGNC Symbol;Acc:HGNC:26413]	-	2	14	0.0172187	0.102004
ENSG00000198785	2.81368	7.03077	0.0178622	0.289229	GRIN3A	9	101569353	101738580	-	8121	protein_coding	glutamate ionotropic receptor NMDA type subunit 3A [Source:HGNC Symbol;Acc:HGNC:16767]	-	12	2	0.0852603	0.0120258
ENSG00000130222	-2.43131	5.39384	0.0178622	0.289229	GADD45G	9	89605013	89606555	+	1322	protein_coding	growth arrest and DNA damage inducible gamma [Source:HGNC Symbol;Acc:HGNC:4097]	-	2	14	0.0872918	0.517118
ENSG00000054356	-2.43131	5.39384	0.0178622	0.289229	PTPRN	2	219289623	219309648	-	8261	protein_coding	protein tyrosine phosphatase, receptor type N [Source:HGNC Symbol;Acc:HGNC:9676]	-	2	14	0.0139692	0.0827539
ENSG00000163377	2.81368	7.03077	0.0178622	0.289229	FAM19A4	3	68731766	68953297	-	3297	protein_coding	family with sequence similarity 19 member A4, C-C motif chemokine like [Source:HGNC Symbol;Acc:HGNC:21591]	-	12	2	0.210009	0.0296213
ENSG00000179846	-2.43131	5.39384	0.0178622	0.289229	NKPD1	19	45149750	45158737	-	4310	protein_coding	NTPase KAP family P-loop domain containing 1 [Source:HGNC Symbol;Acc:HGNC:24739]	-	2	14	0.0267749	0.158615
ENSG00000280426	-2.43131	5.39384	0.0178622	0.289229	AC084876.2	12	109997419	109999127	-	1709	TEC	TEC	-	2	14	0.0675247	0.400017
ENSG00000230185	-2.43131	5.39384	0.0178622	0.289229	C9orf147	9	112433816	112487204	-	1718	antisense	chromosome 9 open reading frame 147 [Source:HGNC Symbol;Acc:HGNC:31438]	-	2	14	0.067171	0.397922
ENSG00000204791	2.81368	7.03077	0.0178622	0.289229	SMPD5	8	144049079	144051522	+	1868	transcribed_unitary_pseudogene	sphingomyelin phosphodiesterase 5 [Source:HGNC Symbol;Acc:HGNC:52275]	-	12	2	0.370663	0.0522813
ENSG00000234630	-2.43131	5.39384	0.0178622	0.289229	AC245060.2	22	22293733	22294794	+	524	lincRNA	novel transcript	-	2	14	0.220229	1.30464
ENSG00000256443	2.81368	7.03077	0.0178622	0.289229	AP003559.1	11	61539516	61542259	-	1831	lincRNA	novel transcript	-	12	2	0.378153	0.0533377
ENSG00000254165	2.81368	7.03077	0.0178622	0.289229	AC090739.1	8	42537529	42538304	-	708	antisense	novel transcript	-	12	2	0.977964	0.13794
ENSG00000158887	2.81368	7.03077	0.0178622	0.289229	MPZ	1	161304735	161309972	-	2154	protein_coding	myelin protein zero [Source:HGNC Symbol;Acc:HGNC:7225]	-	12	2	0.321448	0.0453395
ENSG00000273240	-2.43131	5.39384	0.0178622	0.289229	AC013468.1	2	189763859	189764456	-	598	antisense	novel transcript	-	2	14	0.192976	1.14319
ENSG00000273950	2.81368	7.03077	0.0178622	0.289229	RF00017	2	127856890	127857147	+	258	misc_RNA		-	12	2	2.68372	0.378532
ENSG00000226306	2.81368	7.03077	0.0178622	0.289229	NPY6R	5	137801193	137810751	+	2988	transcribed_processed_pseudogene	neuropeptide Y receptor Y6 (pseudogene) [Source:HGNC Symbol;Acc:HGNC:7959]	-	12	2	0.231726	0.0326845
ENSG00000249353	1.0166	2.02315	0.0178807	0.289327	NPM1P27	5	93682838	93683667	-	830	processed_pseudogene	nucleophosmin 1 pseudogene 27 [Source:HGNC Symbol;Acc:HGNC:45206]	-	432	265	30.0317	15.5905
ENSG00000078018	1.09265	2.13266	0.0179105	0.289405	MAP2	2	209424058	209734118	+	11559	protein_coding	microtubule associated protein 2 [Source:HGNC Symbol;Acc:HGNC:6839]	-	141	82	0.70384	0.346407
ENSG00000121211	1.02419	2.03382	0.0179407	0.289692	MND1	4	153344649	153415118	+	1511	protein_coding	meiotic nuclear divisions 1 [Source:HGNC Symbol;Acc:HGNC:24839]	-	354	216	13.518	6.98043
ENSG00000165861	-1.06244	2.08846	0.01798	0.289896	ZFYVE1	14	72969451	73027212	-	5306	protein_coding	zinc finger FYVE-type containing 1 [Source:HGNC Symbol;Acc:HGNC:13180]	-	101	262	1.09832	2.41116
ENSG00000108932	1.8729	3.66269	0.0180032	0.289896	SLC16A6	17	68267026	68291267	-	4061	protein_coding	solute carrier family 16 member 6 [Source:HGNC Symbol;Acc:HGNC:10927]	-	18	6	0.255749	0.0721458
ENSG00000279089	1.8729	3.66269	0.0180032	0.289896	AC005839.1	17	51183191	51186403	-	3213	TEC	TEC	-	18	6	0.323249	0.0911871
ENSG00000241158	1.8729	3.66269	0.0180032	0.289896	ADAMTS9-AS1	3	64561322	64592757	+	6949	processed_transcript	ADAMTS9 antisense RNA 1 [Source:HGNC Symbol;Acc:HGNC:40625]	-	18	6	0.14946	0.0421621
ENSG00000180720	-1.57648	2.98242	0.0181211	0.291593	CHRM4	11	46385098	46386608	-	1511	protein_coding	cholinergic receptor muscarinic 4 [Source:HGNC Symbol;Acc:HGNC:1953]	-	11	41	0.420052	1.32499
ENSG00000253683	1.06349	2.08997	0.01824	0.293142	AC027309.2	5	172656522	172656713	-	192	processed_pseudogene	coiled-coil domain containing 72 (CCDC72) pseudogene	-	187	111	56.1973	28.2302
ENSG00000083799	-1.12549	2.18176	0.0182426	0.293142	CYLD	16	50742050	50801935	+	12954	protein_coding	CYLD lysine 63 deubiquitinase [Source:HGNC Symbol;Acc:HGNC:2584]	-	52	141	0.231619	0.531506
ENSG00000064787	1.03844	2.054	0.0182849	0.293568	BCAS1	20	53936777	54070594	-	8186	protein_coding	breast carcinoma amplified sequence 1 [Source:HGNC Symbol;Acc:HGNC:974]	-	245	148	1.72691	0.882842
ENSG00000249859	1.43339	2.7008	0.0183322	0.293568	PVT1	8	127794533	128101253	+	5493	lincRNA	Pvt1 oncogene [Source:HGNC Symbol;Acc:HGNC:9709]	-	35	16	0.367649	0.142234
ENSG00000175879	-1.52065	2.8692	0.0183322	0.293568	HOXD8	2	176129694	176132695	+	2629	protein_coding	homeobox D8 [Source:HGNC Symbol;Acc:HGNC:5139]	Homeobox	12	43	0.26337	0.798676
ENSG00000092295	1.43339	2.7008	0.0183322	0.293568	TGM1	14	24249114	24264432	-	3735	protein_coding	transglutaminase 1 [Source:HGNC Symbol;Acc:HGNC:11777]	-	35	16	0.540695	0.209181
ENSG00000148541	-1.52065	2.8692	0.0183322	0.293568	FAM13C	10	59246129	59363181	-	6753	protein_coding	family with sequence similarity 13 member C [Source:HGNC Symbol;Acc:HGNC:19371]	-	12	43	0.102532	0.310931
ENSG00000103066	-1.00177	2.00245	0.0184022	0.294485	PLA2G15	16	68245304	68261062	+	4464	protein_coding	phospholipase A2 group XV [Source:HGNC Symbol;Acc:HGNC:17163]	-	362	900	4.67907	9.8449
ENSG00000237094	1.14331	2.20887	0.0184795	0.295113	AL732372.2	1	365389	522928	-	6204	transcribed_unprocessed_pseudogene	pseudogene similar to part of septin 14 SEPT14	-	98	55	0.911442	0.432896
ENSG00000048162	1.00431	2.00599	0.0186004	0.296256	NOP16	5	176383938	176388975	-	2862	protein_coding	NOP16 nucleolar protein [Source:HGNC Symbol;Acc:HGNC:26934]	-	577	357	11.6327	6.09104
ENSG00000065357	-1.18171	2.26845	0.0186211	0.296357	DGKA	12	55927319	55954027	+	10215	protein_coding	diacylglycerol kinase alpha [Source:HGNC Symbol;Acc:HGNC:2849]	-	39	110	0.220293	0.525832
ENSG00000235947	-1.45837	2.74798	0.0186397	0.29641	EGOT	3	4749192	4751590	-	1464	lincRNA	eosinophil granule ontogeny transcript [Source:HGNC Symbol;Acc:HGNC:37129]	-	14	48	0.551775	1.60101
ENSG00000131370	-1.19264	2.2857	0.0186499	0.29641	SH3BP5	3	15254853	15341368	-	4159	protein_coding	SH3 domain binding protein 5 [Source:HGNC Symbol;Acc:HGNC:10827]	-	38	108	0.527193	1.26802
ENSG00000118785	1.18375	2.27167	0.0188214	0.298524	SPP1	4	87975650	87983426	+	2321	protein_coding	secreted phosphoprotein 1 [Source:HGNC Symbol;Acc:HGNC:11255]	-	77	42	1.91421	0.883623
ENSG00000217930	1.18049	2.26654	0.0188489	0.298756	PAM16	16	4331549	4355607	-	2383	protein_coding	presequence translocase associated motor 16 [Source:HGNC Symbol;Acc:HGNC:29679]	-	75	41	1.81598	0.840142
ENSG00000215414	1.21346	2.31893	0.0188757	0.29879	PSMA6P1	Y	13286638	13287378	+	741	processed_pseudogene	proteasome subunit alpha 6 pseudogene 1 [Source:HGNC Symbol;Acc:HGNC:17460]	-	73	39	5.68433	2.57004
ENSG00000236017	1.30655	2.47349	0.0189024	0.29879	ASMTL-AS1	X	1401769	1414028	+	1335	antisense	ASMTL antisense RNA 1 [Source:HGNC Symbol;Acc:HGNC:25811]	-	44	22	1.90172	0.804701
ENSG00000182050	-1.34974	2.54866	0.0189024	0.29879	MGAT4C	12	85955666	86838904	-	27763	protein_coding	MGAT4 family member C [Source:HGNC Symbol;Acc:HGNC:30871]	-	17	54	0.0353311	0.0949774
ENSG00000141294	-1.25082	2.37976	0.01901	0.300262	LRRC46	17	47831627	47837713	+	2820	protein_coding	leucine rich repeat containing 46 [Source:HGNC Symbol;Acc:HGNC:25047]	-	26	77	0.531985	1.33332
ENSG00000178821	1.2828	2.43311	0.0190443	0.300262	TMEM52	1	1917590	1919273	-	1594	protein_coding	transmembrane protein 52 [Source:HGNC Symbol;Acc:HGNC:27916]	-	57	29	2.0633	0.888388
ENSG00000280079	1.28176	2.43135	0.0190472	0.300262	AC011447.7	19	20220597	20222186	-	1590	TEC	TEC	-	55	28	1.99591	0.859912
ENSG00000254428	1.80628	3.4974	0.0191374	0.30107	AP003392.1	11	119003742	119004893	-	523	antisense	novel transcript, antisense to CCDC84	-	20	7	2.2065	0.653566
ENSG00000177098	-1.92756	3.80411	0.0191374	0.30107	SCN4B	11	118133377	118152888	-	5649	protein_coding	sodium voltage-gated channel beta subunit 4 [Source:HGNC Symbol;Acc:HGNC:10592]	-	5	24	0.0510709	0.207459
ENSG00000245534	1.80628	3.4974	0.0191374	0.30107	RORA-AS1	15	60479178	60630637	+	2036	antisense	RORA antisense RNA 1 [Source:HGNC Symbol;Acc:HGNC:51410]	-	20	7	0.566796	0.167885
ENSG00000108590	1.00185	2.00257	0.019227	0.301868	MED31	17	6643315	6651634	-	2103	protein_coding	mediator complex subunit 31 [Source:HGNC Symbol;Acc:HGNC:24260]	-	476	295	13.06	6.84976
ENSG00000140386	-1.02127	2.0297	0.0192454	0.301953	SCAPER	15	76347904	76905444	-	11610	protein_coding	S-phase cyclin A associated protein in the ER [Source:HGNC Symbol;Acc:HGNC:13081]	-	171	431	0.849843	1.81275
ENSG00000184260	1.11142	2.16058	0.0194539	0.304601	HIST2H2AC	1	149886975	149887364	+	390	protein_coding	histone cluster 2 H2A family member c [Source:HGNC Symbol;Acc:HGNC:4738]	-	115	66	17.0141	8.26366
ENSG00000076258	-1.11523	2.1663	0.0194984	0.304876	FMO4	1	171314208	171342084	+	2517	protein_coding	flavin containing monooxygenase 4 [Source:HGNC Symbol;Acc:HGNC:3772]	-	52	140	1.19205	2.71605
ENSG00000077348	1.00233	2.00324	0.0195104	0.304876	EXOSC5	19	41386374	41397479	-	1488	protein_coding	exosome component 5 [Source:HGNC Symbol;Acc:HGNC:24662]	-	481	298	18.6516	9.77926
ENSG00000242294	1.04328	2.06091	0.0195259	0.304913	STAG3L5P	7	100336079	100351900	+	2804	transcribed_unprocessed_pseudogene	stromal antigen 3-like 5 pseudogene [Source:HGNC Symbol;Acc:HGNC:48896]	-	201	121	4.13612	2.10717
ENSG00000213860	1.08122	2.11583	0.0198468	0.307992	RPL21P75	7	20002765	20003247	+	483	processed_pseudogene	ribosomal protein L21 pseudogene 75 [Source:HGNC Symbol;Acc:HGNC:36460]	-	145	85	17.3219	8.59339
ENSG00000225546	1.13201	2.19164	0.019893	0.307992	LINC02476	7	119704556	119907375	-	1994	lincRNA	long intergenic non-protein coding RNA 2476 [Source:HGNC Symbol;Acc:HGNC:53419]	-	99	56	2.86474	1.37137
ENSG00000124721	-1.78462	3.44528	0.0199879	0.307992	DNAH8	6	38715341	39030529	+	15055	protein_coding	dynein axonemal heavy chain 8 [Source:HGNC Symbol;Acc:HGNC:2952]	-	6	26	0.0229956	0.0843307
ENSG00000269984	1.75392	3.37273	0.0199879	0.307992	AC078795.1	3	169777192	169780334	-	3143	antisense	novel transcript, antisense to MYNN	-	22	8	0.403881	0.124291
ENSG00000237118	1.75392	3.37273	0.0199879	0.307992	CYP2F2P	19	40818414	40826772	-	1547	transcribed_processed_pseudogene	cytochrome P450 family 2 subfamily F member 2, pseudogene [Source:HGNC Symbol;Acc:HGNC:18851]	-	22	8	0.820554	0.252518
ENSG00000158869	1.75392	3.37273	0.0199879	0.307992	FCER1G	1	161215234	161220699	+	964	protein_coding	Fc fragment of IgE receptor Ig [Source:HGNC Symbol;Acc:HGNC:3611]	-	22	8	1.3168	0.405234
ENSG00000006534	-1.02625	2.03673	0.0201454	0.307992	ALDH3B1	11	68008578	68029282	+	6626	protein_coding	aldehyde dehydrogenase 3 family member B1 [Source:HGNC Symbol;Acc:HGNC:410]	-	136	344	1.1843	2.53513
ENSG00000167123	-1.03353	2.04703	0.0201499	0.307992	CERCAM	9	128411751	128437351	+	6059	protein_coding	cerebral endothelial cell adhesion molecule [Source:HGNC Symbol;Acc:HGNC:23723]	-	118	300	1.12371	2.41776
ENSG00000007516	-1.1657	2.24342	0.0203015	0.307992	BAIAP3	16	1333601	1349441	+	6146	protein_coding	BAI1 associated protein 3 [Source:HGNC Symbol;Acc:HGNC:948]	-	38	106	0.356752	0.842182
ENSG00000060642	-1.04547	2.06404	0.0204214	0.307992	PIGV	1	26787472	26798398	+	3382	protein_coding	phosphatidylinositol glycan anchor biosynthesis class V [Source:HGNC Symbol;Acc:HGNC:26031]	-	94	241	1.60372	3.47966
ENSG00000103316	-1.00457	2.00634	0.0205147	0.307992	CRYM	16	21238874	21303083	-	3782	protein_coding	crystallin mu [Source:HGNC Symbol;Acc:HGNC:2418]	-	175	436	2.66988	5.62934
ENSG00000130810	1.08804	2.12585	0.0205812	0.307992	PPAN	19	10106289	10111634	+	2583	protein_coding	peter pan homolog (Drosophila) [Source:HGNC Symbol;Acc:HGNC:9227]	-	120	70	2.6806	1.32332
ENSG00000131781	-1.0415	2.05837	0.0206194	0.307992	FMO5	1	147175351	147243050	-	5986	protein_coding	flavin containing monooxygenase 5 [Source:HGNC Symbol;Acc:HGNC:3773]	-	106	271	1.02175	2.21068
ENSG00000149256	-1.72275	3.30064	0.0206238	0.307992	TENM4	11	78652831	79440948	-	16330	protein_coding	teneurin transmembrane protein 4 [Source:HGNC Symbol;Acc:HGNC:29945]	-	7	29	0.0247336	0.0867171
ENSG00000159761	-1.72275	3.30064	0.0206238	0.307992	C16orf86	16	67666816	67668758	+	1789	protein_coding	chromosome 16 open reading frame 86 [Source:HGNC Symbol;Acc:HGNC:33755]	-	7	29	0.225768	0.791554
ENSG00000228606	1.71165	3.27534	0.0206238	0.307992	AL139011.1	1	160261744	160262778	+	821	antisense	novel transcript	-	24	9	1.68672	0.535294
ENSG00000170092	1.71165	3.27534	0.0206238	0.307992	SPDYE5	7	75493625	75504304	+	3325	protein_coding	speedy/RINGO cell cycle regulator family member E5 [Source:HGNC Symbol;Acc:HGNC:35464]	-	24	9	0.41648	0.132173
ENSG00000271161	1.71165	3.27534	0.0206238	0.307992	BOLA2P2	3	47499841	47500407	+	567	transcribed_processed_pseudogene	bolA family member 2 pseudogene 2 [Source:HGNC Symbol;Acc:HGNC:51438]	-	24	9	2.44232	0.77509
ENSG00000175938	-1.12138	2.17555	0.0206435	0.307992	ORAI3	16	30949066	30956461	+	2643	protein_coding	ORAI calcium release-activated calcium modulator 3 [Source:HGNC Symbol;Acc:HGNC:28185]	-	54	146	1.17889	2.69742
ENSG00000122507	-1.08401	2.11991	0.0206968	0.307992	BBS9	7	33129244	33606068	+	6195	protein_coding	Bardet-Biedl syndrome 9 [Source:HGNC Symbol;Acc:HGNC:30000]	-	71	187	0.66129	1.47399
ENSG00000230562	-1.20665	2.30802	0.0208507	0.307992	FAM133DP	2	157379724	157380414	-	691	processed_pseudogene	family with sequence similarity 133 member D, pseudogene [Source:HGNC Symbol;Acc:HGNC:44192]	-	31	89	2.58856	6.28934
ENSG00000121851	-1.07016	2.09967	0.0208661	0.307992	POLR3GL	1	145964702	145978848	+	1799	protein_coding	RNA polymerase III subunit G like [Source:HGNC Symbol;Acc:HGNC:28466]	-	69	180	2.21306	4.88578
ENSG00000139329	2.08165	4.23292	0.0209521	0.307992	LUM	12	91102629	91111831	-	3008	protein_coding	lumican [Source:HGNC Symbol;Acc:HGNC:6724]	-	14	4	0.26855	0.0649344
ENSG00000278985	2.08165	4.23292	0.0209521	0.307992	AC092718.7	16	80982319	80984094	-	1776	TEC	novel transcript	-	14	4	0.454841	0.109979
ENSG00000243444	2.08165	4.23292	0.0209521	0.307992	PALM2	9	109640788	109946703	+	4943	protein_coding	paralemmin 2 [Source:HGNC Symbol;Acc:HGNC:15845]	-	14	4	0.163423	0.039515
ENSG00000237781	2.08165	4.23292	0.0209521	0.307992	AL356356.1	1	150548562	150557724	-	665	antisense	novel transcript, antisense to ADAMTSL4	-	14	4	1.21473	0.293718
ENSG00000266743	2.08165	4.23292	0.0209521	0.307992	AC103808.6	18	76173304	76177738	-	464	lincRNA	novel transcript	-	14	4	1.74094	0.420954
ENSG00000122592	-1.62871	3.09235	0.0210963	0.307992	HOXA7	7	27153716	27157936	-	2411	protein_coding	homeobox A7 [Source:HGNC Symbol;Acc:HGNC:5108]	Homeobox	8	31	0.191455	0.627852
ENSG00000105289	1.00868	2.01207	0.0211043	0.307992	TJP3	19	3708109	3750813	+	4217	protein_coding	tight junction protein 3 [Source:HGNC Symbol;Acc:HGNC:11829]	-	287	177	3.92693	2.04957
ENSG00000177669	-1.13161	2.19103	0.0212033	0.307992	MBOAT4	8	30131824	30144686	-	1512	protein_coding	membrane bound O-acyltransferase domain containing 4 [Source:HGNC Symbol;Acc:HGNC:32311]	-	47	128	1.79358	4.13382
ENSG00000101605	-1.12838	2.18613	0.0212819	0.307992	MYOM1	18	3066807	3220108	-	6574	protein_coding	myomesin 1 [Source:HGNC Symbol;Acc:HGNC:7613]	-	46	125	0.403741	0.928481
ENSG00000254681	1.08048	2.11473	0.0213092	0.307992	PKD1P5	16	18374521	18401940	-	10291	transcribed_unprocessed_pseudogene	polycystin 1, transient receptor potential channel interacting pseudogene 5 [Source:HGNC Symbol;Acc:HGNC:30069]	-	133	78	0.745708	0.370109
ENSG00000272758	1.5953	3.02158	0.0214439	0.307992	AC083798.2	3	122416207	122443180	+	2891	antisense	uncharacterized LOC102723582 [Source:NCBI gene;Acc:102723582]	-	27	11	0.538878	0.185796
ENSG00000264204	1.5953	3.02158	0.0214439	0.307992	AGAP7P	10	46109621	46131358	+	2062	unprocessed_pseudogene	ArfGAP with GTPase domain, ankyrin repeat and PH domain 7, pseudogene [Source:HGNC Symbol;Acc:HGNC:23465]	-	27	11	0.755527	0.260494
ENSG00000188603	1.5953	3.02158	0.0214439	0.307992	CLN3	16	28474111	28495575	-	9858	protein_coding	CLN3, battenin [Source:HGNC Symbol;Acc:HGNC:2074]	-	27	11	0.158034	0.0544875
ENSG00000228327	1.08172	2.11656	0.021523	0.307992	AL669831.1	1	725885	778626	-	6432	transcribed_unprocessed_pseudogene	general transcription factor IIi (GTF2I) pseudogene	-	128	75	1.14826	0.569388
ENSG00000259172	-1.12147	2.17568	0.0215311	0.307992	AC023024.1	15	101295419	101305737	+	2590	antisense	novel transcript, antisense to SNRPA1 and PCSK6	-	44	119	0.98023	2.24357
ENSG00000175592	3.31255	9.93523	0.0215665	0.307992	FOSL1	11	65892049	65900573	-	1887	protein_coding	FOS like 1, AP-1 transcription factor subunit [Source:HGNC Symbol;Acc:HGNC:13718]	TF_bZIP	9	1	0.275198	0.0258774
ENSG00000114812	-3.01298	8.07228	0.0215665	0.307992	VIPR1	3	42489299	42537573	+	7384	protein_coding	vasoactive intestinal peptide receptor 1 [Source:HGNC Symbol;Acc:HGNC:12694]	-	1	11	0.00781418	0.0727434
ENSG00000228903	-3.01298	8.07228	0.0215665	0.307992	RASA4CP	7	44026951	44041892	-	4056	transcribed_unprocessed_pseudogene	RAS p21 protein activator 4C, pseudogene [Source:HGNC Symbol;Acc:HGNC:44185]	-	1	11	0.0142258	0.13243
ENSG00000145002	3.31255	9.93523	0.0215665	0.307992	FAM86B2	8	12425614	12436343	-	1366	protein_coding	family with sequence similarity 86 member B2 [Source:HGNC Symbol;Acc:HGNC:32222]	-	9	1	0.38016	0.0357472
ENSG00000272009	-3.01298	8.07228	0.0215665	0.307992	AL121944.1	6	28078792	28081130	-	686	antisense	uncharacterized LOC102724889 [Source:NCBI gene;Acc:102724889]	-	1	11	0.0841106	0.782999
ENSG00000203711	-3.01298	8.07228	0.0215665	0.307992	C6orf99	6	158869939	158919105	+	1614	lincRNA	chromosome 6 open reading frame 99 [Source:HGNC Symbol;Acc:HGNC:21179]	-	1	11	0.0357496	0.332799
ENSG00000137752	-3.01298	8.07228	0.0215665	0.307992	CASP1	11	105025443	105035250	-	3698	protein_coding	caspase 1 [Source:HGNC Symbol;Acc:HGNC:1499]	-	1	11	0.015603	0.145251
ENSG00000261079	-3.01298	8.07228	0.0215665	0.307992	AC009053.2	16	74367462	74369826	+	2365	lincRNA	novel transcript	-	1	11	0.0243974	0.227119
ENSG00000261582	-3.01298	8.07228	0.0215665	0.307992	AL121753.1	20	35267885	35280043	-	529	protein_coding	novel transcript	-	1	11	0.109073	1.01538
ENSG00000225945	-3.01298	8.07228	0.0215665	0.307992	AL121574.1	6	37815777	37819218	-	419	antisense	novel transcript	-	1	11	0.137709	1.28195
ENSG00000273243	3.31255	9.93523	0.0215665	0.307992	Z82243.1	22	45155539	45156011	-	473	lincRNA	novel transcript	-	9	1	1.09788	0.103236
ENSG00000260179	3.31255	9.93523	0.0215665	0.307992	AL162741.1	1	1249777	1251334	-	1558	lincRNA	novel transcript	-	9	1	0.333311	0.0313419
ENSG00000235837	3.31255	9.93523	0.0215665	0.307992	AC073333.1	7	16695871	16719898	-	648	antisense	novel transcript	-	9	1	0.801387	0.075356
ENSG00000268093	3.31255	9.93523	0.0215665	0.307992	AC022154.1	19	48619272	48624132	-	1330	antisense	novel transcript, antisense to SPHK2	-	9	1	0.39045	0.0367148
ENSG00000213228	3.31255	9.93523	0.0215665	0.307992	RPL12P38	17	60433678	60435996	-	2319	transcribed_processed_pseudogene	ribosomal protein L12 pseudogene 38 [Source:HGNC Symbol;Acc:HGNC:36838]	-	9	1	0.223932	0.0210568
ENSG00000182676	3.31255	9.93523	0.0215665	0.307992	PPP1R27	17	81833492	81835050	-	1449	protein_coding	protein phosphatase 1 regulatory subunit 27 [Source:HGNC Symbol;Acc:HGNC:16813]	-	9	1	0.358384	0.0336996
ENSG00000236559	-3.01298	8.07228	0.0215665	0.307992	AL117381.1	20	31686216	31716825	+	374	antisense	novel transcript	-	1	11	0.154278	1.4362
ENSG00000132259	-3.01298	8.07228	0.0215665	0.307992	CNGA4	11	6234765	6244429	+	2167	protein_coding	cyclic nucleotide gated channel alpha 4 [Source:HGNC Symbol;Acc:HGNC:2152]	-	1	11	0.0266266	0.247872
ENSG00000232987	-3.01298	8.07228	0.0215665	0.307992	LINC01219	11	1991096	1993670	+	923	lincRNA	long intergenic non-protein coding RNA 1219 [Source:HGNC Symbol;Acc:HGNC:49653]	-	1	11	0.0625134	0.581948
ENSG00000167634	3.31255	9.93523	0.0215665	0.307992	NLRP7	19	54923509	54966312	-	3914	protein_coding	NLR family pyrin domain containing 7 [Source:HGNC Symbol;Acc:HGNC:22947]	-	9	1	0.132677	0.0124759
ENSG00000277893	-3.01298	8.07228	0.0215665	0.307992	SRD5A2	2	31522480	31581067	-	4648	protein_coding	steroid 5 alpha-reductase 2 [Source:HGNC Symbol;Acc:HGNC:11285]	-	1	11	0.0124139	0.115563
ENSG00000279940	-3.01298	8.07228	0.0215665	0.307992	AC073862.3	12	130956384	130958031	-	1648	TEC	novel transcript	-	1	11	0.0350121	0.325933
ENSG00000141052	-3.01298	8.07228	0.0215665	0.307992	MYOCD	17	12665890	12768949	+	8875	protein_coding	myocardin [Source:HGNC Symbol;Acc:HGNC:16067]	-	1	11	0.0065014	0.0605225
ENSG00000211645	-3.01298	8.07228	0.0215665	0.307992	IGLV1-50	22	22327300	22327814	+	405	IG_V_gene	immunoglobulin lambda variable 1-50 (non-functional) [Source:HGNC Symbol;Acc:HGNC:5881]	-	1	11	0.142469	1.32627
ENSG00000272334	3.31255	9.93523	0.0215665	0.307992	AC011816.2	3	36973117	36973672	-	556	lincRNA	novel transcript	-	9	1	0.933991	0.087825
ENSG00000157693	1.07835	2.11162	0.0215979	0.307992	TMEM268	9	114611206	114646422	+	4792	protein_coding	transmembrane protein 268 [Source:HGNC Symbol;Acc:HGNC:24513]	-	126	74	1.51715	0.754063
ENSG00000124279	1.01039	2.01446	0.021603	0.307992	FASTKD3	5	7859159	7869037	-	2857	protein_coding	FAST kinase domains 3 [Source:HGNC Symbol;Acc:HGNC:28758]	-	263	162	5.31154	2.76884
ENSG00000120318	1.12491	2.18088	0.021619	0.307992	ARAP3	5	141653401	141682221	-	6186	protein_coding	ArfGAP with RhoGAP domain, ankyrin repeat and PH domain 3 [Source:HGNC Symbol;Acc:HGNC:24097]	-	95	54	0.886112	0.426262
ENSG00000112812	-1.26875	2.40952	0.0216315	0.307992	PRSS16	6	27247701	27256624	+	5290	protein_coding	serine protease 16 [Source:HGNC Symbol;Acc:HGNC:9480]	-	22	66	0.239962	0.60923
ENSG00000163082	1.57395	2.97719	0.0216953	0.307992	SGPP2	2	222424517	222560948	+	3336	protein_coding	sphingosine-1-phosphate phosphatase 2 [Source:HGNC Symbol;Acc:HGNC:19953]	-	29	12	0.501588	0.17565
ENSG00000230267	1.57395	2.97719	0.0216953	0.307992	HERC2P4	16	32103245	32188107	-	6046	transcribed_unprocessed_pseudogene	hect domain and RLD 2 pseudogene 4 [Source:HGNC Symbol;Acc:HGNC:4872]	-	29	12	0.276761	0.0969183
ENSG00000151376	-1.4851	2.79937	0.0216953	0.307992	ME3	11	86441108	86672636	-	3838	protein_coding	malic enzyme 3 [Source:HGNC Symbol;Acc:HGNC:6985]	-	10	35	0.150338	0.445303
ENSG00000261238	-1.4851	2.79937	0.0216953	0.307992	AC009166.1	16	51149239	51149819	+	487	antisense	novel transcript, antisense to SALL1	-	10	35	1.1848	3.50939
ENSG00000145198	-1.29121	2.44734	0.0217082	0.307992	VWA5B2	3	184230429	184242329	+	5730	protein_coding	von Willebrand factor A domain containing 5B2 [Source:HGNC Symbol;Acc:HGNC:25144]	-	21	64	0.211466	0.545404
ENSG00000283050	1.27942	2.42741	0.0217825	0.307992	GTF2IP12	4	119407967	119454638	-	5530	transcribed_unprocessed_pseudogene	general transcription factor IIi pseudogene 12 [Source:HGNC Symbol;Acc:HGNC:51723]	-	51	26	0.532133	0.229584
ENSG00000170835	1.27942	2.42741	0.0217825	0.307992	CEL	9	133061978	133071861	+	2384	protein_coding	carboxyl ester lipase [Source:HGNC Symbol;Acc:HGNC:1848]	-	51	26	1.23435	0.532549
ENSG00000266967	1.27942	2.42741	0.0217825	0.307992	AARSD1	17	42950526	42964498	-	3704	protein_coding	alanyl-tRNA synthetase domain containing 1 [Source:HGNC Symbol;Acc:HGNC:28417]	-	51	26	0.794464	0.342764
ENSG00000169758	1.27811	2.42521	0.0218534	0.307992	TMEM266	15	76059837	76229121	+	5265	protein_coding	transmembrane protein 266 [Source:HGNC Symbol;Acc:HGNC:26763]	-	49	25	0.536998	0.231865
ENSG00000185774	1.44977	2.73164	0.0218722	0.307992	KCNIP4	4	20728616	21948799	-	4256	protein_coding	potassium voltage-gated channel interacting protein 4 [Source:HGNC Symbol;Acc:HGNC:30083]	-	31	14	0.420276	0.160627
ENSG00000228203	-1.14528	2.2119	0.021898	0.307992	RNF144A-AS1	2	6912277	6918709	-	4648	processed_transcript	RNF144A antisense RNA 1 [Source:HGNC Symbol;Acc:HGNC:30963]	-	40	110	0.496557	1.15563
ENSG00000177984	-1.05742	2.08121	0.0219127	0.307992	LCN15	9	136759634	136766255	-	2887	protein_coding	lipocalin 15 [Source:HGNC Symbol;Acc:HGNC:33777]	-	70	181	1.39903	3.06143
ENSG00000259704	-1.29421	2.45242	0.0219798	0.307992	AC124248.1	15	90839724	90841378	+	402	sense_overlapping	novel transcript, sense overlapping 3' UTR of BLM	-	18	55	2.58358	6.68082
ENSG00000167555	1.44106	2.7152	0.0219911	0.307992	ZNF528	19	52397849	52418412	+	8530	protein_coding	zinc finger protein 528 [Source:HGNC Symbol;Acc:HGNC:29384]	zf-C2H2	33	15	0.223223	0.0858687
ENSG00000274021	1.44106	2.7152	0.0219911	0.307992	AC024909.2	12	89351015	89353271	+	2257	antisense	novel transcript, antisense to DUSP6	-	33	15	0.84364	0.324528
ENSG00000121454	1.34015	2.53177	0.022032	0.307992	LHX4	1	180230286	180278982	+	6061	protein_coding	LIM homeobox 4 [Source:HGNC Symbol;Acc:HGNC:21734]	Homeobox	43	21	0.409354	0.169187
ENSG00000157765	1.27346	2.41741	0.022032	0.307992	SLC34A2	4	25648011	25678748	+	5045	protein_coding	solute carrier family 34 member 2 [Source:HGNC Symbol;Acc:HGNC:11020]	-	43	22	0.491793	0.212939
ENSG00000240053	1.0612	2.08667	0.0220614	0.307992	LY6G5B	6	31670167	31673776	+	3031	protein_coding	lymphocyte antigen 6 family member G5B [Source:HGNC Symbol;Acc:HGNC:13931]	-	143	85	2.72223	1.36939
ENSG00000227268	-1.48681	2.80269	0.0220647	0.307992	KLLN	10	87859161	87863437	-	4277	protein_coding	killin, p53 regulated DNA replication inhibitor [Source:HGNC Symbol;Acc:HGNC:37212]	-	12	42	0.161889	0.479516
ENSG00000107593	1.37621	2.59585	0.0220737	0.307992	PKD2L1	10	100288154	100330486	-	3065	protein_coding	polycystin 2 like 1, transient receptor potential cation channel [Source:HGNC Symbol;Acc:HGNC:9011]	-	42	20	0.790667	0.318634
ENSG00000257270	1.37949	2.60176	0.0221021	0.307992	AL928654.2	14	105467793	105470617	-	445	antisense	novel transcript, antisense to MTA1	-	40	19	5.18651	2.08491
ENSG00000110881	1.38717	2.61565	0.022103	0.307992	ASIC1	12	50057548	50083611	+	5745	protein_coding	acid sensing ion channel subunit 1 [Source:HGNC Symbol;Acc:HGNC:100]	-	36	17	0.361566	0.144495
ENSG00000277363	-1.39715	2.63381	0.0221135	0.307992	SRCIN1	17	38530016	38605930	-	11658	protein_coding	SRC kinase signaling inhibitor 1 [Source:HGNC Symbol;Acc:HGNC:29506]	-	14	46	0.0692913	0.192676
ENSG00000171174	-1.04144	2.05828	0.0222749	0.307992	RBKS	2	27781364	27891098	-	3585	protein_coding	ribokinase [Source:HGNC Symbol;Acc:HGNC:30325]	-	79	202	1.27149	2.75141
ENSG00000205502	-1.10141	2.14564	0.0223682	0.307992	C2CD4B	15	62163535	62165283	-	1579	protein_coding	C2 calcium dependent domain containing 4B [Source:HGNC Symbol;Acc:HGNC:33628]	-	51	136	1.86364	4.20581
ENSG00000226084	1.08397	2.11986	0.022567	0.307992	AC113935.1	1	77129114	77129668	+	555	processed_pseudogene	ribosomal protein L17 (RPL17) pseudogene	-	106	62	11.0202	5.45496
ENSG00000123999	-1.05058	2.07137	0.0225732	0.307992	INHA	2	219569162	219575713	+	1753	protein_coding	inhibin subunit alpha [Source:HGNC Symbol;Acc:HGNC:6065]	-	75	193	2.46862	5.37611
ENSG00000234287	1.14992	2.21901	0.0226539	0.307992	AC099560.2	3	40761545	40761799	+	255	processed_pseudogene	ribosomal protein S27 (RPS27) pseudogene	-	77	43	17.4231	8.23419
ENSG00000184012	-5.8772	58.7778	0.0226768	0.307992	TMPRSS2	21	41464551	41531116	-	6117	protein_coding	transmembrane serine protease 2 [Source:HGNC Symbol;Acc:HGNC:11876]	-	0	8	0	0.0638623
ENSG00000197937	5.77592	54.7931	0.0226768	0.307992	ZNF347	19	53124072	53159075	-	9131	protein_coding	zinc finger protein 347 [Source:HGNC Symbol;Acc:HGNC:16447]	zf-C2H2	6	0	0.0379147	0
ENSG00000183691	5.77592	54.7931	0.0226768	0.307992	NOG	17	56593699	56595590	+	1892	protein_coding	noggin [Source:HGNC Symbol;Acc:HGNC:7866]	-	6	0	0.182981	0
ENSG00000135116	5.77592	54.7931	0.0226768	0.307992	HRK	12	116856144	116881441	-	6853	protein_coding	harakiri, BCL2 interacting protein [Source:HGNC Symbol;Acc:HGNC:5185]	-	6	0	0.0505179	0
ENSG00000016402	5.77592	54.7931	0.0226768	0.307992	IL20RA	6	136999971	137045180	-	4730	protein_coding	interleukin 20 receptor subunit alpha [Source:HGNC Symbol;Acc:HGNC:6003]	-	6	0	0.0731922	0
ENSG00000108511	-5.8772	58.7778	0.0226768	0.307992	HOXB6	17	48595751	48604992	-	2604	protein_coding	homeobox B6 [Source:HGNC Symbol;Acc:HGNC:5117]	Homeobox	0	8	0	0.150017
ENSG00000197046	-5.8772	58.7778	0.0226768	0.307992	SIGLEC15	18	45825512	45844080	+	3598	protein_coding	sialic acid binding Ig like lectin 15 [Source:HGNC Symbol;Acc:HGNC:27596]	-	0	8	0	0.108573
ENSG00000230316	5.77592	54.7931	0.0226768	0.307992	FEZF1-AS1	7	122303658	122310077	+	3313	antisense	FEZF1 antisense RNA 1 [Source:HGNC Symbol;Acc:HGNC:41001]	-	6	0	0.104497	0
ENSG00000247121	-5.8772	58.7778	0.0226768	0.307992	AC009126.1	5	96814028	96935809	-	2536	antisense	novel transcript, antisense to LNPEP and ERAP2	-	0	8	0	0.15404
ENSG00000272894	-5.8772	58.7778	0.0226768	0.307992	AC004982.2	7	7552462	7566996	-	1730	lincRNA	novel transcript	-	0	8	0	0.225807
ENSG00000119714	5.77592	54.7931	0.0226768	0.307992	GPR68	14	91232532	91253925	-	3278	protein_coding	G protein-coupled receptor 68 [Source:HGNC Symbol;Acc:HGNC:4519]	-	6	0	0.105613	0
ENSG00000215912	5.77592	54.7931	0.0226768	0.307992	TTC34	1	2635976	2801717	-	8814	protein_coding	tetratricopeptide repeat domain 34 [Source:HGNC Symbol;Acc:HGNC:34297]	-	6	0	0.0392783	0
ENSG00000140279	-5.8772	58.7778	0.0226768	0.307992	DUOX2	15	45092650	45114344	-	9834	protein_coding	dual oxidase 2 [Source:HGNC Symbol;Acc:HGNC:13273]	-	0	8	0	0.039724
ENSG00000197889	-5.8772	58.7778	0.0226768	0.307992	MEIG1	10	14959439	14988050	+	1407	protein_coding	meiosis/spermiogenesis associated 1 [Source:HGNC Symbol;Acc:HGNC:23429]	-	0	8	0	0.277644
ENSG00000261173	-5.8772	58.7778	0.0226768	0.307992	AC018845.3	16	46973989	46978983	+	516	antisense	novel transcript, antisense to DNAJA2	-	0	8	0	0.757065
ENSG00000207383	5.77592	54.7931	0.0226768	0.307992	RF00019	2	112579484	112579584	-	101	misc_RNA		-	6	0	3.42772	0
ENSG00000279605	5.77592	54.7931	0.0226768	0.307992	AC067930.6	8	143578358	143583304	+	4947	TEC	TEC	-	6	0	0.0699817	0
ENSG00000229519	5.77592	54.7931	0.0226768	0.307992	AL591866.1	1	6547905	6548619	+	401	processed_pseudogene	ribosomal protein L34 (RPL34) pseudogene	-	6	0	0.86334	0
ENSG00000205143	-5.8772	58.7778	0.0226768	0.307992	ARID3C	9	34621379	34628107	-	1411	protein_coding	AT-rich interaction domain 3C [Source:HGNC Symbol;Acc:HGNC:21209]	ARID	0	8	0	0.276857
ENSG00000236098	-5.8772	58.7778	0.0226768	0.307992	AC097059.2	1	94318479	94324569	-	592	lincRNA	novel transcript	-	0	8	0	0.659874
ENSG00000257954	5.77592	54.7931	0.0226768	0.307992	AC125611.2	12	49389516	49390162	+	647	processed_pseudogene	FGFR1 oncogene partner 2 (FGFR1OP2) pseudogene	-	6	0	0.535084	0
ENSG00000228661	5.77592	54.7931	0.0226768	0.307992	AC090587.1	11	3854318	3855509	-	494	antisense	uncharacterized LOC105376527 [Source:NCBI gene;Acc:105376527]	-	6	0	0.700808	0
ENSG00000187952	-5.8772	58.7778	0.0226768	0.307992	HS6ST1P1	1	21428303	21429536	+	1234	processed_pseudogene	heparan sulfate 6-O-sulfotransferase 1 pseudogene 1 [Source:HGNC Symbol;Acc:HGNC:31835]	-	0	8	0	0.316569
ENSG00000163632	-5.8772	58.7778	0.0226768	0.307992	C3orf49	3	63819362	63848636	+	1581	protein_coding	chromosome 3 open reading frame 49 [Source:HGNC Symbol;Acc:HGNC:25190]	-	0	8	0	0.247088
ENSG00000269901	5.77592	54.7931	0.0226768	0.307992	AC010531.5	16	87362536	87367476	+	450	antisense	novel transcript, antisense to FBXO31	-	6	0	0.769332	0
ENSG00000257052	-5.8772	58.7778	0.0226768	0.307992	AP003721.4	11	60906789	60909742	+	810	antisense	novel transcript	-	0	8	0	0.482278
ENSG00000235330	-5.8772	58.7778	0.0226768	0.307992	RPL12P25	9	477750	478423	+	674	transcribed_processed_pseudogene	ribosomal protein L12 pseudogene 25 [Source:HGNC Symbol;Acc:HGNC:37008]	-	0	8	0	0.579593
ENSG00000214784	5.77592	54.7931	0.0226768	0.307992	AC010468.1	5	111192226	111193042	-	817	processed_pseudogene	ribosomal protein S3A (RPS3A) pseudogene	-	6	0	0.423745	0
ENSG00000272103	-5.8772	58.7778	0.0226768	0.307992	AC026741.1	5	36861736	36867238	-	2237	lincRNA	novel transcript	-	0	8	0	0.174629
ENSG00000274721	5.77592	54.7931	0.0226768	0.307992	RF02039	5	142318047	142318167	+	121	misc_RNA		-	6	0	2.86115	0
ENSG00000109101	-5.8772	58.7778	0.0226768	0.307992	FOXN1	17	28506243	28538896	+	3637	protein_coding	forkhead box N1 [Source:HGNC Symbol;Acc:HGNC:12765]	Fork	0	8	0	0.107409
ENSG00000275401	5.77592	54.7931	0.0226768	0.307992	AL391095.3	20	38418483	38419202	-	720	lincRNA	novel transcript	-	6	0	0.480832	0
ENSG00000214867	-5.8772	58.7778	0.0226768	0.307992	SRSF9P1	21	36295173	36295702	-	530	processed_pseudogene	serine and arginine rich splicing factor 9 pseudogene 1 [Source:HGNC Symbol;Acc:HGNC:10792]	-	0	8	0	0.737067
ENSG00000174171	-5.8772	58.7778	0.0226768	0.307992	AC020659.1	15	41892793	41898575	+	3653	antisense	novel transcript, antisense to SPTBN5	-	0	8	0	0.106938
ENSG00000150637	5.77592	54.7931	0.0226768	0.307992	CD226	18	69831158	69961803	-	13638	protein_coding	CD226 molecule [Source:HGNC Symbol;Acc:HGNC:16961]	-	6	0	0.0253849	0
ENSG00000257443	5.77592	54.7931	0.0226768	0.307992	AC068305.2	12	58920639	59064238	+	555	antisense	uncharacterized LOC105369791 [Source:NCBI gene;Acc:105369791]	-	6	0	0.623782	0
ENSG00000240322	5.77592	54.7931	0.0226768	0.307992	RN7SL481P	7	143298516	143298814	+	299	misc_RNA	RNA, 7SL, cytoplasmic 481, pseudogene [Source:HGNC Symbol;Acc:HGNC:46497]	-	6	0	1.15786	0
ENSG00000245330	-5.8772	58.7778	0.0226768	0.307992	AP005717.1	8	119867419	119874488	-	1945	lincRNA	novel transcript	-	0	8	0	0.200846
ENSG00000275215	5.77592	54.7931	0.0226768	0.307992	RNA5-8SN2	21	8395607	8395759	+	153	rRNA	RNA, 5.8S ribosomal N2 [Source:HGNC Symbol;Acc:HGNC:53521]	-	6	0	2.26274	0
ENSG00000239300	5.77592	54.7931	0.0226768	0.307992	AC080162.1	2	9505445	9512412	+	491	antisense	novel transcript	-	6	0	0.70509	0
ENSG00000268926	5.77592	54.7931	0.0226768	0.307992	AL354861.3	9	95772323	95776282	+	3919	lincRNA	novel transcript	-	6	0	0.0883387	0
ENSG00000252192	5.77592	54.7931	0.0226768	0.307992	RF00411	12	122492113	122492241	-	129	snoRNA		-	6	0	2.68372	0
ENSG00000258788	5.77592	54.7931	0.0226768	0.307992	CKS1BP1	14	96223108	96223347	+	240	processed_pseudogene	CDC28 protein kinase regulatory subunit 1B pseudogene 1 [Source:HGNC Symbol;Acc:HGNC:20004]	-	6	0	1.4425	0
ENSG00000234969	5.77592	54.7931	0.0226768	0.307992	AL627389.1	X	74069276	74070832	+	1182	processed_pseudogene	novel alanyl-tRNA synthetase protein pseudogene	-	6	0	0.292893	0
ENSG00000223549	5.77592	54.7931	0.0226768	0.307992	MTND5P28	2	120215181	120217279	+	1594	processed_pseudogene	MT-ND5 pseudogene 28 [Source:HGNC Symbol;Acc:HGNC:42290]	-	6	0	0.217189	0
ENSG00000161103	-5.8772	58.7778	0.0226768	0.307992	AC008132.1	22	18846811	18861049	+	7689	transcribed_processed_pseudogene	POM121 transmembrane nucleoporin (POM121) pseudogene	-	0	8	0	0.0508058
ENSG00000201544	5.77592	54.7931	0.0226768	0.307992	SNORA16B	1	212352816	212352950	+	135	snoRNA	small nucleolar RNA, H/ACA box 16B [Source:HGNC Symbol;Acc:HGNC:32606]	-	6	0	2.56444	0
ENSG00000258745	5.77592	54.7931	0.0226768	0.307992	AL358334.3	14	50912226	50913358	+	535	antisense	novel transcript, antisense to PYGL	-	6	0	0.647101	0
ENSG00000256293	-5.8772	58.7778	0.0226768	0.307992	AC135279.2	12	64338178	64338797	-	620	processed_pseudogene	ATPase, H+ transporting, lysosomal 31kDa, V1 subunit E1 (ATP6V1E1) pseudogene	-	0	8	0	0.630073
ENSG00000175084	-5.8772	58.7778	0.0226768	0.307992	DES	2	219418377	219426739	+	2464	protein_coding	desmin [Source:HGNC Symbol;Acc:HGNC:2770]	-	0	8	0	0.158541
ENSG00000267033	5.77592	54.7931	0.0226768	0.307992	AC020911.1	19	16186276	16189458	-	578	antisense	novel transcript, antisense FAM32A	-	6	0	0.598961	0
ENSG00000225676	5.77592	54.7931	0.0226768	0.307992	AC002378.1	22	30184644	30207109	-	298	antisense	novel transcript	-	6	0	1.16174	0
ENSG00000201988	-5.8772	58.7778	0.0226768	0.307992	RF00019	6	30736304	30736414	-	111	misc_RNA		-	0	8	0	3.51933
ENSG00000258545	5.77592	54.7931	0.0226768	0.307992	RHOXF1-AS1	X	120036236	120146854	+	2495	antisense	RHOXF1 antisense RNA 1 [Source:HGNC Symbol;Acc:HGNC:51582]	-	6	0	0.138757	0
ENSG00000267583	5.77592	54.7931	0.0226768	0.307992	AC007998.3	18	35443869	35467088	-	916	lincRNA	novel transcript	-	6	0	0.377947	0
ENSG00000259531	-5.8772	58.7778	0.0226768	0.307992	AC022306.1	15	49365124	49366685	-	1562	processed_pseudogene	signal peptide peptidase-like 2A (SPPL2A) pseudogene	-	0	8	0	0.250093
ENSG00000200879	5.77592	54.7931	0.0226768	0.307992	SNORD14E	11	123058077	123058161	-	85	snoRNA	small nucleolar RNA, C/D box 14E [Source:HGNC Symbol;Acc:HGNC:30354]	-	6	0	4.07293	0
ENSG00000279254	5.77592	54.7931	0.0226768	0.307992	AC020604.1	2	46668870	46670778	+	1909	TEC	TEC	-	6	0	0.181351	0
ENSG00000226091	-5.8772	58.7778	0.0226768	0.307992	LINC00937	12	8295986	8396803	-	5663	lincRNA	long intergenic non-protein coding RNA 937 [Source:HGNC Symbol;Acc:HGNC:48629]	-	0	8	0	0.0689821
ENSG00000273674	5.77592	54.7931	0.0226768	0.307992	AC021752.1	15	50839875	50908599	-	2669	lincRNA	novel transcript	-	6	0	0.129711	0
ENSG00000261773	5.77592	54.7931	0.0226768	0.307992	AC244090.2	X	154517840	154518631	-	792	sense_overlapping	novel transcript, overlapping to FAM3A	-	6	0	0.43712	0
ENSG00000272707	5.77592	54.7931	0.0226768	0.307992	AC046143.2	3	194637505	194637664	-	160	lincRNA	novel transcript	-	6	0	2.16375	0
ENSG00000266869	-5.8772	58.7778	0.0226768	0.307992	AC005993.1	14	71848606	71908430	+	397	lincRNA	novel transcript	-	0	8	0	0.983994
ENSG00000278214	-5.8772	58.7778	0.0226768	0.307992	LINC02139	16	85137150	85149443	+	2005	lincRNA	long intergenic non-protein coding RNA 2139 [Source:HGNC Symbol;Acc:HGNC:52999]	-	0	8	0	0.194836
ENSG00000267405	-5.8772	58.7778	0.0226768	0.307992	AC005180.1	17	44794747	44797783	-	587	lincRNA	novel transcript	-	0	8	0	0.665495
ENSG00000237133	-5.8772	58.7778	0.0226768	0.307992	AC020594.1	2	33555047	33563547	-	338	antisense	novel transcript	-	0	8	0	1.15576
ENSG00000284716	-5.8772	58.7778	0.0226768	0.307992	AL034417.3	1	7998187	7999934	-	1043	lincRNA	novel transcript	-	0	8	0	0.37454
ENSG00000238043	-5.8772	58.7778	0.0226768	0.307992	AC024559.1	3	193980614	194006098	+	566	lincRNA	novel transcript	-	0	8	0	0.690186
ENSG00000222335	-5.8772	58.7778	0.0226768	0.307992	RF00019	3	196202349	196202453	+	105	misc_RNA		-	0	8	0	3.72043
ENSG00000250321	5.77592	54.7931	0.0226768	0.307992	AC079140.2	4	342821	342962	-	142	processed_pseudogene	pseudogene similar to part of ribosomal protein S17 (RPS17)	-	6	0	2.43802	0
ENSG00000285849	5.77592	54.7931	0.0226768	0.307992	AL021918.4	6	27454568	27457575	+	1591	antisense	novel transcript, antisense to ZNF184	-	6	0	0.217599	0
ENSG00000231329	5.77592	54.7931	0.0226768	0.307992	AL031772.1	6	139144204	139239653	-	5149	processed_transcript	novel transcript	-	6	0	0.0672362	0
ENSG00000273819	-5.8772	58.7778	0.0226768	0.307992	ENPP7P7	11	67812557	67873367	-	1102	unprocessed_pseudogene	ectonucleotide pyrophosphatase/phosphodiesterase 7 pseudogene 7 [Source:HGNC Symbol;Acc:HGNC:48690]	-	0	8	0	0.354488
ENSG00000236754	5.77592	54.7931	0.0226768	0.307992	AC007666.1	22	17580157	17589192	-	1960	antisense	novel transcript	-	6	0	0.176632	0
ENSG00000226349	-5.8772	58.7778	0.0226768	0.307992	AC099066.1	1	225710968	225736274	-	534	sense_intronic	novel transcript	-	0	8	0	0.731546
ENSG00000285588	-5.8772	58.7778	0.0226768	0.307992	AL160254.1	13	67121081	67156624	+	752	antisense	novel transcript, antisense to PCDH9	-	0	8	0	0.519475
ENSG00000261528	5.77592	54.7931	0.0226768	0.307992	AC002400.1	16	23500905	23501630	+	726	processed_pseudogene	cyclin Y-like 1 (CCNYL1) pseudogene	-	6	0	0.476859	0
ENSG00000238267	5.77592	54.7931	0.0226768	0.307992	AC104850.1	3	39338129	39338879	-	476	processed_pseudogene	centromere protein P (CENPP) pseudogene	-	6	0	0.727309	0
ENSG00000202502	5.77592	54.7931	0.0226768	0.307992	RNA5SP151	3	183258300	183258416	-	117	rRNA_pseudogene	RNA, 5S ribosomal pseudogene 151 [Source:HGNC Symbol;Acc:HGNC:43051]	-	6	0	2.95897	0
ENSG00000233321	5.77592	54.7931	0.0226768	0.307992	AL357833.1	10	3486894	3502838	-	832	lincRNA	novel transcript	-	6	0	0.416105	0
ENSG00000268069	5.77592	54.7931	0.0226768	0.307992	AC004466.1	12	47784923	47786002	+	1080	antisense	novel transcript, antisense to HDAC7	-	6	0	0.320555	0
ENSG00000212138	-5.8772	58.7778	0.0226768	0.307992	RNA5SP372	12	109059986	109060100	+	115	rRNA_pseudogene	RNA, 5S ribosomal pseudogene 372 [Source:HGNC Symbol;Acc:HGNC:43272]	-	0	8	0	3.39692
ENSG00000262332	5.77592	54.7931	0.0226768	0.307992	AC136624.1	16	16223027	16224261	+	542	antisense	novel transcript, antisense to ABCC6	-	6	0	0.638744	0
ENSG00000232294	-5.8772	58.7778	0.0226768	0.307992	AL031674.1	20	52671917	52690929	+	1173	lincRNA	novel transcript	-	0	8	0	0.333031
ENSG00000236107	5.77592	54.7931	0.0226768	0.307992	AC010127.1	2	165957399	166301784	+	5453	antisense	uncharacterized LOC102724058 [Source:NCBI gene;Acc:102724058]	-	6	0	0.0634879	0
ENSG00000228061	5.77592	54.7931	0.0226768	0.307992	AC131571.1	11	31618124	31767953	-	4246	antisense	novel transcript, antisense to ELP4	-	6	0	0.0815354	0
ENSG00000223719	5.77592	54.7931	0.0226768	0.307992	AC069277.2	3	6692319	6693088	+	432	processed_pseudogene	tyrosine 3-monooxygenase/tryptophan 5-monooxygenase activation protein, theta polypeptide (YWHAQ) pseudogene	-	6	0	0.801387	0
ENSG00000249226	5.77592	54.7931	0.0226768	0.307992	SUCLG2P4	5	29001760	29003357	+	1027	processed_pseudogene	succinate-CoA ligase GDP-forming beta subunit pseudogene 4 [Source:HGNC Symbol;Acc:HGNC:43999]	-	6	0	0.337098	0
ENSG00000236849	5.77592	54.7931	0.0226768	0.307992	LINC01474	9	72871728	72874109	-	639	lincRNA	long intergenic non-protein coding RNA 1474 [Source:HGNC Symbol;Acc:HGNC:51111]	-	6	0	0.541783	0
ENSG00000258224	5.77592	54.7931	0.0226768	0.307992	AC090049.2	12	91871122	91871230	-	109	processed_pseudogene	alcohol dehydrogenase 5 (class III), chi polypeptide (ADH5 ) pseudogene	-	6	0	3.17614	0
ENSG00000258007	5.77592	54.7931	0.0226768	0.307992	AC063947.1	12	101038420	101039094	-	557	antisense	novel transcript, antisense to ANO4	-	6	0	0.621543	0
ENSG00000251533	5.77592	54.7931	0.0226768	0.307992	LINC00605	14	103187221	103189028	-	1558	lincRNA	long intergenic non-protein coding RNA 605 [Source:HGNC Symbol;Acc:HGNC:43928]	-	6	0	0.222208	0
ENSG00000221493	5.77592	54.7931	0.0226768	0.307992	MIR320C1	18	21683510	21683597	+	88	miRNA	microRNA 320c-1 [Source:HGNC Symbol;Acc:HGNC:35248]	-	6	0	3.93408	0
ENSG00000138641	-1.0801	2.11418	0.0229252	0.31064	HERC3	4	88592423	88708542	+	6981	protein_coding	HECT and RLD domain containing E3 ubiquitin protein ligase 3 [Source:HGNC Symbol;Acc:HGNC:4876]	-	59	155	0.487651	1.08419
ENSG00000164077	1.01745	2.02434	0.0229392	0.310648	MON1A	3	49907160	49930173	-	6446	protein_coding	MON1 homolog A, secretory trafficking associated [Source:HGNC Symbol;Acc:HGNC:28207]	-	217	133	1.94243	1.00752
ENSG00000233198	-2.30883	4.95481	0.0230709	0.311741	RNF224	9	137227271	137229638	+	1798	protein_coding	ring finger protein 224 [Source:HGNC Symbol;Acc:HGNC:41912]	-	3	19	0.0962734	0.516008
ENSG00000261662	-2.30883	4.95481	0.0230709	0.311741	AL359752.1	1	119909255	119910613	-	1359	sense_overlapping	novel transcript, sense overlapping NOTCH2	-	3	19	0.127373	0.682695
ENSG00000181649	1.05763	2.08151	0.0230749	0.311741	PHLDA2	11	2928273	2929455	-	955	protein_coding	pleckstrin homology like domain family A member 2 [Source:HGNC Symbol;Acc:HGNC:12385]	-	146	87	8.82113	4.44845
ENSG00000205534	-1.04762	2.06712	0.023087	0.311741	SMG1P2	16	29527568	29594966	-	4221	unprocessed_pseudogene	SMG1 pseudogene 2 [Source:HGNC Symbol;Acc:HGNC:49859]	-	81	208	1.10725	2.40625
ENSG00000274251	-1.18755	2.27766	0.0231639	0.312598	AP003419.2	11	67353629	67354348	+	527	lincRNA	novel transcript	-	30	85	3.28462	7.87592
ENSG00000163884	1.02152	2.03005	0.0235403	0.317125	KLF15	3	126342635	126357442	-	2848	protein_coding	Kruppel like factor 15 [Source:HGNC Symbol;Acc:HGNC:14536]	zf-C2H2	180	110	3.64676	1.88602
ENSG00000273033	-1.01729	2.02411	0.0236974	0.319035	LINC02035	3	122886941	122892416	+	5476	lincRNA	long intergenic non-protein coding RNA 2035 [Source:HGNC Symbol;Acc:HGNC:52875]	-	107	269	1.12744	2.39873
ENSG00000162645	-1.03622	2.05085	0.0238791	0.320803	GBP2	1	89106132	89150456	-	6276	protein_coding	guanylate binding protein 2 [Source:HGNC Symbol;Acc:HGNC:4183]	-	84	214	0.772274	1.66504
ENSG00000259439	-1.19359	2.28721	0.0238961	0.320803	LINC01833	2	44921077	44939199	-	3872	lincRNA	long intergenic non-protein coding RNA 1833 [Source:HGNC Symbol;Acc:HGNC:52644]	-	26	74	0.387448	0.933231
ENSG00000101353	-1.19359	2.28721	0.0238961	0.320803	MROH8	20	37101226	37179588	-	3878	protein_coding	maestro heat like repeat family member 8 [Source:HGNC Symbol;Acc:HGNC:16125]	-	26	74	0.386848	0.931787
ENSG00000111012	1.13009	2.18872	0.024204	0.323882	CYP27B1	12	57762334	57768986	-	3440	protein_coding	cytochrome P450 family 27 subfamily B member 1 [Source:HGNC Symbol;Acc:HGNC:2606]	-	83	47	1.39218	0.667164
ENSG00000184368	-1.24791	2.37497	0.0243897	0.325738	MAP7D2	X	20006713	20116917	-	4376	protein_coding	MAP7 domain containing 2 [Source:HGNC Symbol;Acc:HGNC:25899]	-	23	68	0.303267	0.758795
ENSG00000179988	1.05144	2.0726	0.0244576	0.325777	PSTK	10	122954381	122997513	+	6118	protein_coding	phosphoseryl-tRNA kinase [Source:HGNC Symbol;Acc:HGNC:28578]	-	122	73	1.1506	0.582648
ENSG00000169884	-2.05018	4.14156	0.0245106	0.325777	WNT10B	12	48965340	48971763	-	2629	protein_coding	Wnt family member 10B [Source:HGNC Symbol;Acc:HGNC:12775]	-	4	21	0.0877899	0.390051
ENSG00000239697	-2.05018	4.14156	0.0245106	0.325777	TNFSF12	17	7548891	7557890	+	1879	protein_coding	TNF superfamily member 12 [Source:HGNC Symbol;Acc:HGNC:11927]	-	4	21	0.122831	0.545739
ENSG00000183186	-2.05018	4.14156	0.0245106	0.325777	C2CD4C	19	405438	409170	-	3129	protein_coding	C2 calcium dependent domain containing 4C [Source:HGNC Symbol;Acc:HGNC:29417]	-	4	21	0.0737614	0.327723
ENSG00000182107	-2.05018	4.14156	0.0245106	0.325777	TMEM30B	14	61277370	61281840	-	4471	protein_coding	transmembrane protein 30B [Source:HGNC Symbol;Acc:HGNC:27254]	-	4	21	0.0516215	0.229355
ENSG00000133321	1.79097	3.46046	0.0245106	0.325777	RARRES3	11	63536809	63546462	+	1299	protein_coding	retinoic acid receptor responder 3 [Source:HGNC Symbol;Acc:HGNC:9869]	-	17	6	0.755118	0.225546
ENSG00000109743	1.79097	3.46046	0.0245106	0.325777	BST1	4	15702950	15738313	+	2980	protein_coding	bone marrow stromal cell antigen 1 [Source:HGNC Symbol;Acc:HGNC:1118]	-	17	6	0.32916	0.0983168
ENSG00000172426	1.79097	3.46046	0.0245106	0.325777	RSPH9	6	43645046	43672599	+	2631	protein_coding	radial spoke head 9 homolog [Source:HGNC Symbol;Acc:HGNC:21057]	-	17	6	0.372823	0.111358
ENSG00000185834	1.22843	2.34311	0.0245632	0.325995	RPL12P4	20	55074644	55075140	+	497	processed_pseudogene	ribosomal protein L12 pseudogene 4 [Source:HGNC Symbol;Acc:HGNC:16587]	-	53	28	6.15311	2.75102
ENSG00000273162	1.22843	2.34311	0.0245632	0.325995	AL133215.2	10	101060029	101061005	-	977	lincRNA	novel transcript	-	53	28	3.13009	1.39945
ENSG00000237187	1.0406	2.05709	0.0248757	0.32939	NR2F1-AS1	5	93409359	93585648	-	7720	antisense	NR2F1 antisense RNA 1 [Source:HGNC Symbol;Acc:HGNC:48622]	-	136	82	1.01647	0.518668
ENSG00000156500	-1.29211	2.44886	0.0249226	0.329636	FAM122C	X	134796395	134854835	+	7959	protein_coding	family with sequence similarity 122C [Source:HGNC Symbol;Acc:HGNC:25202]	-	20	61	0.144993	0.374252
ENSG00000256667	1.12651	2.18329	0.0250508	0.330525	KLRA1P	12	10588063	10599669	-	2457	transcribed_unprocessed_pseudogene	killer cell lectin like receptor A1, pseudogene [Source:HGNC Symbol;Acc:HGNC:6372]	-	74	42	1.73781	0.834713
ENSG00000178878	-1.31771	2.4927	0.0251076	0.330557	APOLD1	12	12725917	12829975	+	7243	protein_coding	apolipoprotein L domain containing 1 [Source:HGNC Symbol;Acc:HGNC:25268]	-	19	59	0.15136	0.397765
ENSG00000169994	-1.2426	2.36625	0.0252954	0.33212	MYO7B	2	127535802	127637729	+	8800	protein_coding	myosin VIIB [Source:HGNC Symbol;Acc:HGNC:7607]	-	19	56	0.124579	0.310741
ENSG00000285979	1.15301	2.22377	0.0254355	0.33235	AC009090.6	16	57177349	57181390	+	3524	antisense	novel transcript, antisense to FAM192A	-	70	39	1.14614	0.540408
ENSG00000273259	-1.15726	2.23034	0.0254355	0.33235	AL049839.2	14	94592058	94624646	+	3067	protein_coding	novel transcript	-	31	86	0.583207	1.36923
ENSG00000142235	-1.86652	3.64652	0.0254753	0.33235	LMTK3	19	48485271	48513935	-	5667	protein_coding	lemur tyrosine kinase 3 [Source:HGNC Symbol;Acc:HGNC:19295]	-	5	23	0.0509087	0.198184
ENSG00000214439	1.7327	3.3235	0.0254753	0.33235	FAM185BP	7	77083787	77122116	-	1284	transcribed_unprocessed_pseudogene	family with sequence similarity 185 member B, pseudogene [Source:HGNC Symbol;Acc:HGNC:21813]	-	19	7	0.853814	0.266211
ENSG00000271380	-1.86652	3.64652	0.0254753	0.33235	AL451085.2	1	154961825	154962623	+	799	antisense	uncharacterized LOC101928120 [Source:NCBI gene;Acc:101928120]	-	5	23	0.361076	1.40564
ENSG00000261652	1.7327	3.3235	0.0254753	0.33235	C15orf65	15	55408548	55418764	+	843	protein_coding	chromosome 15 open reading frame 65 [Source:HGNC Symbol;Acc:HGNC:44654]	-	19	7	1.30047	0.405474
ENSG00000251350	-1.86652	3.64652	0.0254753	0.33235	LINC02475	4	44016861	44022063	+	2823	lincRNA	long intergenic non-protein coding RNA 2475 [Source:HGNC Symbol;Acc:HGNC:53418]	-	5	23	0.102196	0.397841
ENSG00000267197	1.7327	3.3235	0.0254753	0.33235	AC011461.1	19	10490339	10491000	-	357	sense_intronic	novel transcript, sense intronic with KEAP1	-	19	7	3.07086	0.957465
ENSG00000187653	-1.2678	2.40794	0.0254851	0.33235	TMSB4XP8	4	90838903	90839037	-	135	processed_pseudogene	TMSB4X pseudogene 8 [Source:HGNC Symbol;Acc:HGNC:11885]	-	18	54	7.69332	19.5323
ENSG00000183569	1.24281	2.36659	0.0254851	0.33235	SERHL2	22	42553617	42574382	+	2821	protein_coding	serine hydrolase like 2 [Source:HGNC Symbol;Acc:HGNC:29446]	-	44	23	0.899963	0.398123
ENSG00000199753	1.16962	2.24953	0.0256392	0.333984	SNORD104	17	64146083	64146152	+	70	snoRNA	small nucleolar RNA, C/D box 104 [Source:HGNC Symbol;Acc:HGNC:32768]	-	69	38	56.8756	26.5081
ENSG00000216937	-1.29543	2.45451	0.0256753	0.334268	CCDC7	10	32446140	32882874	+	9573	protein_coding	coiled-coil domain containing 7 [Source:HGNC Symbol;Acc:HGNC:26533]	-	17	52	0.102465	0.265246
ENSG00000132622	1.16559	2.24325	0.0258508	0.336354	HSPA12B	20	3732667	3753111	+	3151	protein_coding	heat shock protein family A (Hsp70) member 12B [Source:HGNC Symbol;Acc:HGNC:16193]	-	67	37	1.22688	0.573385
ENSG00000162194	-1.32588	2.50686	0.0258645	0.336354	LBHD1	11	62662817	62672255	-	3362	protein_coding	LBH domain containing 1 [Source:HGNC Symbol;Acc:HGNC:28351]	-	16	50	0.274598	0.726215
ENSG00000189195	-1.03859	2.05421	0.0259866	0.33741	BTBD8	1	92080305	92184725	+	6887	protein_coding	BTB domain containing 8 [Source:HGNC Symbol;Acc:HGNC:21019]	-	67	171	0.561332	1.21244
ENSG00000221995	1.34306	2.5369	0.0260503	0.33741	TIAF1	17	29073521	29078857	-	5337	protein_coding	TGFB1-induced anti-apoptotic factor 1 [Source:HGNC Symbol;Acc:HGNC:11803]	-	39	19	0.421641	0.17384
ENSG00000164287	-1.35959	2.56613	0.0260503	0.33741	CDC20B	5	55112995	55173175	-	4496	protein_coding	cell division cycle 20B [Source:HGNC Symbol;Acc:HGNC:24222]	-	15	48	0.192504	0.521324
ENSG00000256229	1.16132	2.23662	0.026071	0.33741	ZNF486	19	20167228	20200490	+	4261	protein_coding	zinc finger protein 486 [Source:HGNC Symbol;Acc:HGNC:20807]	zf-C2H2	65	36	0.880191	0.412557
ENSG00000267698	1.68715	3.2202	0.0261053	0.33741	AC002116.2	19	36014508	36045972	+	643	antisense	uncharacterized LOC101927572 [Source:NCBI gene;Acc:101927572]	-	21	8	1.88444	0.607536
ENSG00000230084	1.68715	3.2202	0.0261053	0.33741	AC006059.1	3	42601963	42654388	-	785	antisense	novel transcript	-	21	8	1.54356	0.497638
ENSG00000250474	1.68715	3.2202	0.0261053	0.33741	WBP1LP2	7	107628553	107629550	+	998	processed_pseudogene	WW domain binding protein 1-like pseudogene 2 [Source:HGNC Symbol;Acc:HGNC:43949]	-	21	8	1.21413	0.391428
ENSG00000151062	-1.12434	2.18001	0.0261765	0.338142	CACNA2D4	12	1791957	1918836	-	7639	protein_coding	calcium voltage-gated channel auxiliary subunit alpha2delta 4 [Source:HGNC Symbol;Acc:HGNC:20202]	-	38	103	0.287027	0.658406
ENSG00000206195	1.1568	2.22962	0.0263	0.339172	DUXAP8	22	15784959	15829984	+	5545	processed_transcript	double homeobox A pseudogene 8 [Source:HGNC Symbol;Acc:HGNC:32187]	-	63	35	0.655562	0.308219
ENSG00000063180	-1.67236	3.18737	0.0264977	0.340777	CA11	19	48637942	48646312	-	2075	protein_coding	carbonic anhydrase 11 [Source:HGNC Symbol;Acc:HGNC:1370]	-	7	28	0.19465	0.65892
ENSG00000158423	-1.67236	3.18737	0.0264977	0.340777	RIBC1	X	53422690	53431120	+	2993	protein_coding	RIB43A domain with coiled-coils 1 [Source:HGNC Symbol;Acc:HGNC:26537]	-	7	28	0.134948	0.456819
ENSG00000276182	1.65053	3.1395	0.0264977	0.340777	AL163051.2	14	96537170	96537904	+	735	sense_intronic	novel transcript, sense intronic to PAPOLA	-	23	9	1.80557	0.597927
ENSG00000230563	-1.67236	3.18737	0.0264977	0.340777	AL121757.1	20	5471207	5475182	+	1964	lincRNA	uncharacterized LOC643406 [Source:NCBI gene;Acc:643406]	-	7	28	0.205651	0.696161
ENSG00000282386	-1.45216	2.73618	0.0265521	0.341287	AL358472.4	1	153964361	153965070	+	710	antisense	novel transcript, antisense to SLC39A1	-	12	41	0.975209	2.8198
ENSG00000161031	-1.10118	2.14531	0.0266607	0.341739	PGLYRP2	19	15468645	15498956	-	3188	protein_coding	peptidoglycan recognition protein 2 [Source:HGNC Symbol;Acc:HGNC:30013]	-	45	120	0.814459	1.83804
ENSG00000165379	-1.10118	2.14531	0.0266607	0.341739	LRFN5	14	41607570	41904549	+	6140	protein_coding	leucine rich repeat and fibronectin type III domain containing 5 [Source:HGNC Symbol;Acc:HGNC:20360]	-	45	120	0.422882	0.954346
ENSG00000258636	1.40264	2.64384	0.02678	0.341964	AL121821.1	14	41587861	41604856	-	530	lincRNA	novel transcript	-	30	14	3.26603	1.28987
ENSG00000242798	1.54108	2.91013	0.0268201	0.341964	AC073842.2	7	100115214	100127139	-	572	antisense	novel transcript	-	26	11	2.62272	0.939052
ENSG00000270084	-1.50659	2.84138	0.0268201	0.341964	GAS5-AS1	1	173863248	173863941	+	694	antisense	GAS5 antisense RNA 1 [Source:HGNC Symbol;Acc:HGNC:44119]	-	9	32	0.748269	2.25156
ENSG00000253194	1.54108	2.91013	0.0268201	0.341964	AL137009.1	6	118934770	119182745	+	1812	antisense	novel transcript, antisense to FAM184A	-	26	11	0.827923	0.296434
ENSG00000171234	-1.11564	2.16691	0.0268226	0.341964	UGT2B7	4	69051363	69112987	+	2259	protein_coding	UDP glucuronosyltransferase family 2 member B7 [Source:HGNC Symbol;Acc:HGNC:12554]	-	36	97	0.91952	2.09676
ENSG00000260855	1.40931	2.6561	0.0268319	0.341964	AL591848.4	1	246772301	246775772	+	3472	lincRNA	novel transcript	-	28	13	0.465322	0.182834
ENSG00000259086	1.40931	2.6561	0.0268319	0.341964	AL136298.3	14	32271857	32272301	-	445	processed_pseudogene	KIAA1143 (KIAA1143) pseudogene	-	28	13	3.63055	1.42651
ENSG00000259605	1.40931	2.6561	0.0268319	0.341964	AC074212.1	19	45764785	45769806	+	2600	processed_transcript	novel transcript, antisense to SIX5	-	28	13	0.621383	0.244153
ENSG00000253981	1.52352	2.87492	0.0268319	0.341964	ALG1L13P	8	8236003	8244667	-	1447	transcribed_unprocessed_pseudogene	asparagine-linked glycosylation 1-like 13, pseudogene [Source:HGNC Symbol;Acc:HGNC:44382]	-	28	12	1.11651	0.404954
ENSG00000243547	-1.00297	2.00413	0.0269721	0.342022	HNRNPKP4	3	96349554	96350939	+	1386	processed_pseudogene	heterogeneous nuclear ribonucleoprotein K pseudogene 4 [Source:HGNC Symbol;Acc:HGNC:42377]	-	94	234	3.91327	8.24414
ENSG00000149418	-2.32549	5.01234	0.0270427	0.342022	ST14	11	130159562	130210376	+	4350	protein_coding	suppression of tumorigenicity 14 [Source:HGNC Symbol;Acc:HGNC:11344]	-	2	13	0.0265287	0.145931
ENSG00000225361	-2.32549	5.01234	0.0270427	0.342022	PPP1R26-AS1	9	135462727	135480777	-	3750	antisense	PPP1R26 antisense RNA 1 [Source:HGNC Symbol;Acc:HGNC:48717]	-	2	13	0.0307733	0.16928
ENSG00000196338	-2.32549	5.01234	0.0270427	0.342022	NLGN3	X	71144831	71171201	+	4006	protein_coding	neuroligin 3 [Source:HGNC Symbol;Acc:HGNC:14289]	-	2	13	0.0288067	0.158462
ENSG00000197208	2.68936	6.45026	0.0270427	0.342022	SLC22A4	5	132294443	132344206	+	2688	protein_coding	solute carrier family 22 member 4 [Source:HGNC Symbol;Acc:HGNC:10968]	-	11	2	0.236123	0.0363324
ENSG00000266235	2.68936	6.45026	0.0270427	0.342022	MIR3176	16	543277	543366	+	90	miRNA	microRNA 3176 [Source:HGNC Symbol;Acc:HGNC:38345]	-	11	2	7.05221	1.08513
ENSG00000166473	2.68936	6.45026	0.0270427	0.342022	PKD1L2	16	81100875	81220370	-	18637	polymorphic_pseudogene	polycystin 1 like 2 (gene/pseudogene) [Source:HGNC Symbol;Acc:HGNC:21715]	-	11	2	0.0340558	0.00524019
ENSG00000213204	2.68936	6.45026	0.0270427	0.342022	AL049697.1	6	87408012	87511634	+	3530	protein_coding	novel transcript, C6orf165-SLC35A1 readthrough	-	11	2	0.179801	0.0276661
ENSG00000215217	-2.32549	5.01234	0.0270427	0.342022	C5orf49	5	7830378	7851490	-	2385	protein_coding	chromosome 5 open reading frame 49 [Source:HGNC Symbol;Acc:HGNC:27028]	-	2	13	0.0483856	0.266163
ENSG00000250039	2.68936	6.45026	0.0270427	0.342022	AC096719.1	4	21949015	22330330	+	1874	antisense	novel transcript	-	11	2	0.338687	0.0521139
ENSG00000112238	2.68936	6.45026	0.0270427	0.342022	PRDM13	6	99606730	99615578	+	3276	protein_coding	PR/SET domain 13 [Source:HGNC Symbol;Acc:HGNC:13998]	zf-C2H2	11	2	0.193742	0.0298112
ENSG00000163491	1.11686	2.16874	0.0270554	0.342022	NEK10	3	27110085	27369460	-	9582	protein_coding	NIMA related kinase 10 [Source:HGNC Symbol;Acc:HGNC:18592]	-	77	44	0.463671	0.224228
ENSG00000234420	1.03995	2.05615	0.0270614	0.342022	ZNF37BP	10	42513510	42552822	-	10256	transcribed_processed_pseudogene	zinc finger protein 37B, pseudogene [Source:HGNC Symbol;Acc:HGNC:13103]	-	126	76	0.708871	0.36185
ENSG00000033122	-1.01267	2.01764	0.0271028	0.342022	LRRC7	1	69568398	70151945	+	14652	protein_coding	leucine rich repeat containing 7 [Source:HGNC Symbol;Acc:HGNC:18531]	-	77	193	0.303228	0.643211
ENSG00000167771	-1.03718	2.05221	0.0272333	0.343028	RCOR2	11	63911221	63916844	-	2738	protein_coding	REST corepressor 2 [Source:HGNC Symbol;Acc:HGNC:27455]	MYB	60	153	1.26442	2.72867
ENSG00000007306	-1.01248	2.01737	0.0273697	0.344559	CEACAM7	19	41673307	41706976	-	2649	protein_coding	carcinoembryonic antigen related cell adhesion molecule 7 [Source:HGNC Symbol;Acc:HGNC:1819]	-	83	208	1.80789	3.8342
ENSG00000155542	1.02315	2.03235	0.0275765	0.346412	SETD9	5	56909260	56925532	+	2711	protein_coding	SET domain containing 9 [Source:HGNC Symbol;Acc:HGNC:28508]	-	136	83	2.89457	1.495
ENSG00000266714	-1.02068	2.02887	0.0277011	0.34779	MYO15B	17	75588058	75626501	+	12761	protein_coding	myosin XVB [Source:HGNC Symbol;Acc:HGNC:14083]	-	73	184	0.330075	0.704086
ENSG00000026036	1.04742	2.06683	0.0281757	0.352985	RTEL1-TNFRSF6B	20	63659300	63698684	+	9093	protein_coding	RTEL1-TNFRSF6B readthrough (NMD candidate) [Source:HGNC Symbol;Acc:HGNC:44095]	-	115	69	0.729736	0.37054
ENSG00000253251	1.03646	2.05119	0.0282886	0.353638	SHLD3	5	65624765	65630891	+	1964	protein_coding	shieldin complex subunit 3 [Source:HGNC Symbol;Acc:HGNC:53826]	-	129	78	3.78986	1.9393
ENSG00000163898	-1.01704	2.02376	0.0283646	0.354398	LIPH	3	185506262	185552613	-	4122	protein_coding	lipase H [Source:HGNC Symbol;Acc:HGNC:18483]	-	70	176	0.979862	2.08496
ENSG00000268471	1.22183	2.33243	0.0285101	0.355642	MIR4453HG	4	152536264	152539263	+	3000	bidirectional_promoter_lncRNA	MIR4453 host gene [Source:HGNC Symbol;Acc:HGNC:25288]	-	49	26	0.942431	0.423199
ENSG00000230074	-1.26832	2.40881	0.0285101	0.355642	AL162231.2	9	34665665	34681298	+	665	antisense	novel transcript	-	20	60	1.73533	4.40578
ENSG00000227674	1.00782	2.01087	0.0285814	0.355768	LINC00355	13	63851197	64076044	-	2448	lincRNA	long intergenic non-protein coding RNA 355 [Source:HGNC Symbol;Acc:HGNC:27061]	-	154	95	3.62981	1.89498
ENSG00000266904	-1.21667	2.3241	0.0291851	0.362119	LINC00663	19	19757366	19776423	-	4334	lincRNA	long intergenic non-protein coding RNA 663 [Source:HGNC Symbol;Acc:HGNC:28609]	-	19	55	0.252953	0.619679
ENSG00000240498	1.21411	2.31997	0.0291851	0.362119	CDKN2B-AS1	9	21994778	22121097	+	8024	antisense	CDKN2B antisense RNA 1 [Source:HGNC Symbol;Acc:HGNC:34341]	-	45	24	0.323591	0.146054
ENSG00000139915	1.02524	2.0353	0.0299339	0.369439	MDGA2	14	46840092	47674954	-	7753	protein_coding	MAM domain containing glycosylphosphatidylinositol anchor 2 [Source:HGNC Symbol;Acc:HGNC:19835]	-	128	78	0.95261	0.491267
ENSG00000179841	-1.00195	2.0027	0.0300744	0.370102	AKAP5	14	64465499	64474503	+	7512	protein_coding	A-kinase anchoring protein 5 [Source:HGNC Symbol;Acc:HGNC:375]	-	82	204	0.629844	1.32607
ENSG00000185507	-1.29681	2.45686	0.0302988	0.370102	IRF7	11	612553	615999	-	2628	protein_coding	interferon regulatory factor 7 [Source:HGNC Symbol;Acc:HGNC:6122]	IRF	16	49	0.351293	0.910466
ENSG00000125850	2.37465	5.18611	0.0303481	0.370102	OVOL2	20	17956979	18059188	-	2175	protein_coding	ovo like zinc finger 2 [Source:HGNC Symbol;Acc:HGNC:15804]	zf-C2H2	13	3	0.344873	0.0673527
ENSG00000135838	2.37465	5.18611	0.0303481	0.370102	NPL	1	182789293	182830384	+	4975	protein_coding	N-acetylneuraminate pyruvate lyase [Source:HGNC Symbol;Acc:HGNC:16781]	-	13	3	0.150774	0.0294456
ENSG00000125462	2.37465	5.18611	0.0303481	0.370102	C1orf61	1	156404250	156430701	-	12314	protein_coding	chromosome 1 open reading frame 61 [Source:HGNC Symbol;Acc:HGNC:30780]	-	13	3	0.0609143	0.0118964
ENSG00000274641	2.37465	5.18611	0.0303481	0.370102	HIST1H2BO	6	27893463	27893843	+	381	protein_coding	histone cluster 1 H2B family member o [Source:HGNC Symbol;Acc:HGNC:4758]	-	13	3	1.96876	0.384494
ENSG00000266969	1.97562	3.93296	0.0303481	0.370102	AP002449.1	18	12984694	12991173	-	474	antisense	novel transcript, antisense SEH1L	-	13	4	1.58249	0.412073
ENSG00000231587	1.97562	3.93296	0.0303481	0.370102	SNORD62B	9	131490486	131490571	+	86	snoRNA	small nucleolar RNA, C/D box 62B [Source:HGNC Symbol;Acc:HGNC:23031]	-	13	4	8.72208	2.27119
ENSG00000179082	2.37465	5.18611	0.0303481	0.370102	C9orf106	9	129321016	129324905	+	3145	lincRNA	chromosome 9 open reading frame 106 (putative) [Source:HGNC Symbol;Acc:HGNC:31370]	-	13	3	0.238505	0.0465794
ENSG00000178440	1.97562	3.93296	0.0303481	0.370102	LINC00843	10	49972763	49982053	+	711	lincRNA	long intergenic non-protein coding RNA 843 [Source:HGNC Symbol;Acc:HGNC:45009]	-	13	4	1.05499	0.274716
ENSG00000267216	1.97562	3.93296	0.0303481	0.370102	AC020915.1	19	58278966	58315197	+	4227	protein_coding	novel transcript	-	13	4	0.177454	0.0462084
ENSG00000105967	2.37465	5.18611	0.0303481	0.370102	TFEC	7	115935148	116159896	-	8644	protein_coding	transcription factor EC [Source:HGNC Symbol;Acc:HGNC:11754]	bHLH	13	3	0.0867768	0.0169473
ENSG00000275714	1.97562	3.93296	0.0303481	0.370102	HIST1H3A	6	26020490	26020900	+	411	protein_coding	histone cluster 1 H3 family member a [Source:HGNC Symbol;Acc:HGNC:4766]	-	13	4	1.82506	0.475238
ENSG00000259630	2.37465	5.18611	0.0303481	0.370102	AC104046.1	15	85415228	85415633	+	406	transcribed_processed_pseudogene	fatty acid binding protein 5 (psoriasis-associated) (FABP5) pseudogene	-	13	3	1.84753	0.360818
ENSG00000231625	1.97562	3.93296	0.0303481	0.370102	SLC47A1P2	17	19615789	19633825	+	1483	transcribed_unprocessed_pseudogene	SLC47A1 pseudogene 2 [Source:HGNC Symbol;Acc:HGNC:53866]	-	13	4	0.505798	0.131708
ENSG00000280927	1.18703	2.27683	0.0304005	0.370478	CTBP1-AS	4	1210120	1218591	+	3886	antisense	CTBP1 antisense RNA [Source:HGNC Symbol;Acc:HGNC:48337]	-	57	31	0.846344	0.38954
ENSG00000076716	-1.32931	2.51282	0.0306957	0.372709	GPC4	X	133300103	133415490	-	4960	protein_coding	glypican 4 [Source:HGNC Symbol;Acc:HGNC:4452]	-	15	47	0.174496	0.46271
ENSG00000235169	-1.32931	2.51282	0.0306957	0.372709	SMIM1	1	3772761	3775982	+	981	protein_coding	small integral membrane protein 1 (Vel blood group) [Source:HGNC Symbol;Acc:HGNC:44204]	-	15	47	0.882261	2.33949
ENSG00000259203	-1.07697	2.10959	0.0308931	0.373934	AC016044.1	15	52801614	52804942	-	572	lincRNA	uncharacterized LOC101928499 [Source:NCBI gene;Acc:101928499]	-	45	118	4.53933	10.0735
ENSG00000260196	1.13228	2.19206	0.031014	0.375202	AC124798.1	11	17380649	17383531	+	2883	antisense	antisense to KCNJ11 and overlapping to a novel gene	-	69	39	1.38095	0.660561
ENSG00000180822	1.01556	2.02168	0.0311237	0.376137	PSMG4	6	3231403	3303373	+	10418	protein_coding	proteasome assembly chaperone 4 [Source:HGNC Symbol;Acc:HGNC:21108]	-	119	73	0.659079	0.342162
ENSG00000273899	1.17805	2.2627	0.031216	0.376861	NOL12	22	37681673	37693478	+	3589	protein_coding	nucleolar protein 12 [Source:HGNC Symbol;Acc:HGNC:28585]	-	53	29	0.852074	0.394564
ENSG00000125650	-1.03638	2.05108	0.0313169	0.377687	PSPN	19	6375148	6379058	-	3911	protein_coding	persephin [Source:HGNC Symbol;Acc:HGNC:9579]	-	51	130	0.752415	1.62311
ENSG00000109680	-1.04692	2.06611	0.0315162	0.379893	TBC1D19	4	26576437	26755351	+	3434	protein_coding	TBC1 domain family member 19 [Source:HGNC Symbol;Acc:HGNC:25624]	-	44	113	0.739311	1.60683
ENSG00000248103	1.07151	2.10163	0.0316989	0.3817	AC008443.2	5	181281375	181283652	+	549	lincRNA	novel transcript	-	78	46	8.1978	4.09146
ENSG00000272068	-1.03448	2.04838	0.0319354	0.383242	AL365181.2	1	156637783	156641004	-	3222	lincRNA	novel transcript	-	55	140	0.984945	2.12176
ENSG00000179750	-1.41666	2.66966	0.0319423	0.383242	APOBEC3B	22	38982347	38992804	+	1896	protein_coding	apolipoprotein B mRNA editing enzyme catalytic subunit 3B [Source:HGNC Symbol;Acc:HGNC:17352]	-	12	40	0.365189	1.03018
ENSG00000245750	-1.41666	2.66966	0.0319423	0.383242	DRAIC	15	69463026	69843120	+	18461	lincRNA	downregulated RNA in cancer, inhibitor of cell invasion and migration [Source:HGNC Symbol;Acc:HGNC:27082]	-	12	40	0.037506	0.105803
ENSG00000115850	-1.41666	2.66966	0.0319423	0.383242	LCT	2	135787840	135837180	-	6586	protein_coding	lactase [Source:HGNC Symbol;Acc:HGNC:6530]	-	12	40	0.105132	0.296573
ENSG00000268030	1.19675	2.29223	0.0321187	0.384759	AC005253.1	19	18557775	18561560	-	2001	antisense	novel transcript, antisense to KXD1	-	50	27	1.44178	0.658885
ENSG00000271976	1.03034	2.0425	0.0322249	0.384759	AC012467.2	3	53858994	53861576	-	2583	antisense	novel transcript, antisense to IL17RB	-	112	68	2.50189	1.28552
ENSG00000172575	1.86819	3.65074	0.0322922	0.384759	RASGRP1	15	38488103	38565575	-	6097	protein_coding	RAS guanyl releasing protein 1 [Source:HGNC Symbol;Acc:HGNC:9878]	-	15	5	0.141955	0.0400449
ENSG00000272277	1.86819	3.65074	0.0322922	0.384759	AL031963.3	6	3068045	3068894	-	850	antisense	novel transcript, antisense to RIPK1	-	15	5	1.01823	0.287239
ENSG00000140986	1.86819	3.65074	0.0322922	0.384759	RPL3L	16	1943974	1957606	-	2758	protein_coding	ribosomal protein L3 like [Source:HGNC Symbol;Acc:HGNC:10351]	-	15	5	0.313814	0.0885255
ENSG00000279026	1.86819	3.65074	0.0322922	0.384759	AC005225.4	14	73580694	73582918	+	2225	TEC	TEC	-	15	5	0.388988	0.109732
ENSG00000267769	1.86819	3.65074	0.0322922	0.384759	AC011498.6	19	4454014	4455286	+	510	antisense	novel transcript, antisense to UBX6	-	15	5	1.69706	0.478732
ENSG00000068976	-2.23141	4.69592	0.0322922	0.384759	PYGM	11	64746389	64760297	-	4981	protein_coding	glycogen phosphorylase, muscle associated [Source:HGNC Symbol;Acc:HGNC:9726]	-	3	18	0.034752	0.176461
ENSG00000184454	-2.23141	4.69592	0.0322922	0.384759	NCMAP	1	24556111	24609328	+	4122	protein_coding	non-compact myelin associated protein [Source:HGNC Symbol;Acc:HGNC:29332]	-	3	18	0.0419941	0.213234
ENSG00000170289	-2.23141	4.69592	0.0322922	0.384759	CNGB3	8	86553977	86743675	-	5025	protein_coding	cyclic nucleotide gated channel beta 3 [Source:HGNC Symbol;Acc:HGNC:2153]	-	3	18	0.0344477	0.174916
ENSG00000239473	-2.23141	4.69592	0.0322922	0.384759	RPL7P38	12	80028893	80029631	+	739	processed_pseudogene	ribosomal protein L7 pseudogene 38 [Source:HGNC Symbol;Acc:HGNC:36731]	-	3	18	0.234235	1.18938
ENSG00000105991	1.35118	2.5512	0.0323643	0.384759	HOXA1	7	27092993	27095996	-	2539	protein_coding	homeobox A1 [Source:HGNC Symbol;Acc:HGNC:5099]	Homeobox	31	15	0.704489	0.288484
ENSG00000272644	1.35118	2.5512	0.0323643	0.384759	AC097468.3	2	219069354	219069809	-	456	lincRNA	novel transcript	-	31	15	3.92258	1.60627
ENSG00000160223	-1.07991	2.11391	0.032467	0.385756	ICOSLG	21	44217014	44240966	-	9341	protein_coding	inducible T cell costimulator ligand [Source:HGNC Symbol;Acc:HGNC:17087]	-	35	92	0.216197	0.480936
ENSG00000225177	-1.24413	2.36875	0.0326066	0.386623	FLJ46906	6	138692548	138697288	+	1220	antisense	uncharacterized LOC441172 [Source:NCBI gene;Acc:441172]	-	20	59	0.9459	2.36148
ENSG00000259295	1.35391	2.55604	0.0327785	0.387871	CSPG4P12	15	85191438	85213905	+	11495	transcribed_unprocessed_pseudogene	chondroitin sulfate proteoglycan 4 pseudogene 12 [Source:HGNC Symbol;Acc:HGNC:48362]	-	29	14	0.145567	0.0594719
ENSG00000196747	1.35391	2.55604	0.0327785	0.387871	HIST1H2AI	6	27808199	27808701	+	503	protein_coding	histone cluster 1 H2A family member i [Source:HGNC Symbol;Acc:HGNC:4725]	-	29	14	3.32663	1.3591
ENSG00000224888	1.35391	2.55604	0.0327785	0.387871	AC138028.2	16	88731180	88741425	+	4797	antisense	uncharacterized LOC100289580 [Source:NCBI gene;Acc:100289580]	-	29	14	0.348821	0.142512
ENSG00000113100	-1.05749	2.08131	0.0328967	0.389072	CDH9	5	26880600	27121150	-	4203	protein_coding	cadherin 9 [Source:HGNC Symbol;Acc:HGNC:1768]	-	46	119	0.6315	1.38255
ENSG00000279041	1.04689	2.06607	0.0329243	0.3892	AC102945.2	8	30552345	30553766	+	1422	TEC	TEC	-	85	51	3.44901	1.75131
ENSG00000198870	-1.11978	2.17314	0.0331458	0.390164	STKLD1	9	133376367	133406096	+	4408	protein_coding	serine/threonine kinase like domain containing 1 [Source:HGNC Symbol;Acc:HGNC:28669]	-	27	73	0.353425	0.808675
ENSG00000187554	-1.40056	2.64004	0.0331737	0.390164	TLR5	1	223109406	223143282	-	7765	protein_coding	toll like receptor 5 [Source:HGNC Symbol;Acc:HGNC:11851]	-	10	33	0.0743076	0.207523
ENSG00000271447	1.35706	2.56162	0.0331737	0.390164	MMP28	17	35756249	35795707	-	2858	protein_coding	matrix metallopeptidase 28 [Source:HGNC Symbol;Acc:HGNC:14366]	-	27	13	0.5451	0.222113
ENSG00000224417	-1.40056	2.64004	0.0331737	0.390164	AL606970.1	6	168298069	168302114	-	2559	sense_intronic	novel transcript	-	10	33	0.225478	0.629704
ENSG00000147174	1.70409	3.25823	0.0333763	0.391755	GCNA	X	71578411	71613583	+	3621	protein_coding	germ cell nuclear acidic peptidase [Source:HGNC Symbol;Acc:HGNC:15805]	-	16	6	0.254957	0.0809125
ENSG00000263968	1.70409	3.25823	0.0333763	0.391755	RN7SL381P	16	85659378	85659675	+	298	misc_RNA	RNA, 7SL, cytoplasmic 381, pseudogene [Source:HGNC Symbol;Acc:HGNC:46397]	-	16	6	3.09798	0.983168
ENSG00000178342	1.70409	3.25823	0.0333763	0.391755	KCNG2	18	79863668	79900184	+	2162	protein_coding	potassium voltage-gated channel modifier subfamily G member 2 [Source:HGNC Symbol;Acc:HGNC:6249]	-	16	6	0.427011	0.135515
ENSG00000178248	-1.98026	3.94564	0.0333763	0.391755	LINC01658	22	23462086	23486980	-	1578	lincRNA	long intergenic non-protein coding RNA 1658 [Source:HGNC Symbol;Acc:HGNC:52446]	-	4	20	0.146261	0.618893
ENSG00000260121	1.48475	2.79868	0.0335331	0.392604	AC138028.4	16	88718615	88720459	+	1845	antisense	novel transcript, antisense to FAM38A	-	25	11	0.781841	0.291131
ENSG00000285752	1.48475	2.79868	0.0335331	0.392604	AL031281.3	1	22028317	22052927	-	2574	lincRNA	novel transcript	-	25	11	0.560411	0.208678
ENSG00000226329	1.48475	2.79868	0.0335331	0.392604	AC005682.1	7	22863874	22881350	-	1467	unprocessed_pseudogene	solute carrier family 40 (iron-regulated transporter), member 1 (SLC40A1) pseudogene	-	25	11	0.983297	0.366147
ENSG00000175707	-1.19027	2.28195	0.033664	0.39298	KDF1	1	26949562	26960406	-	1793	protein_coding	keratinocyte differentiation factor 1 [Source:HGNC Symbol;Acc:HGNC:26624]	-	19	54	0.611432	1.47064
ENSG00000278558	-1.19027	2.28195	0.033664	0.39298	TMEM191B	22	18527802	18530573	+	2067	protein_coding	transmembrane protein 191B [Source:HGNC Symbol;Acc:HGNC:33600]	-	19	54	0.530381	1.27569
ENSG00000175564	1.56183	2.95228	0.0338323	0.39298	UCP3	11	74000281	74009435	-	3684	protein_coding	uncoupling protein 3 [Source:HGNC Symbol;Acc:HGNC:12519]	-	24	10	0.375895	0.132548
ENSG00000130176	-1.53293	2.89373	0.0338323	0.39298	CNN1	19	11538717	11550323	+	2887	protein_coding	calponin 1 [Source:HGNC Symbol;Acc:HGNC:2155]	-	8	29	0.159889	0.490506
ENSG00000183784	-1.53293	2.89373	0.0338323	0.39298	C9orf66	9	212824	215893	-	3070	protein_coding	chromosome 9 open reading frame 66 [Source:HGNC Symbol;Acc:HGNC:26436]	-	8	29	0.150358	0.461267
ENSG00000229127	1.65517	3.1496	0.0339102	0.39298	AC007038.1	2	210030733	210064356	+	2199	antisense	novel transcript	-	18	7	0.472305	0.155441
ENSG00000258116	-1.80278	3.48892	0.0339102	0.39298	PPIAP45	12	47341614	47342089	-	476	processed_pseudogene	peptidylprolyl isomerase A pseudogene 45 [Source:HGNC Symbol;Acc:HGNC:53669]	-	5	22	0.606091	2.25688
ENSG00000180772	-1.80278	3.48892	0.0339102	0.39298	AGTR2	X	116170722	116174972	+	2882	protein_coding	angiotensin II receptor type 2 [Source:HGNC Symbol;Acc:HGNC:338]	-	5	22	0.100104	0.372753
ENSG00000237149	-1.566	2.96082	0.0340354	0.39298	ZNF503-AS2	10	75401519	75408982	+	3348	antisense	ZNF503 antisense RNA 2 [Source:HGNC Symbol;Acc:HGNC:23525]	-	7	26	0.120639	0.379211
ENSG00000271780	-1.566	2.96082	0.0340354	0.39298	AL118558.3	14	101948347	101949425	+	1079	lincRNA	novel transcript	-	7	26	0.374327	1.17664
ENSG00000198237	-1.62016	3.07409	0.0340354	0.39298	AC131392.1	5	69875271	69920867	+	633	unprocessed_pseudogene	glucuronidase, beta (GUSB) pseudogene	-	7	27	0.638071	2.08283
ENSG00000279611	1.58672	3.00366	0.0340354	0.39298	AC012313.10	19	58350795	58351720	+	926	TEC	novel transcript	-	22	9	1.37084	0.474596
ENSG00000253092	-1.566	2.96082	0.0340354	0.39298	RF01241	3	183452567	183452764	+	198	snoRNA		-	7	26	2.03989	6.41211
ENSG00000163606	-1.62016	3.07409	0.0340354	0.39298	CD200R1	3	112921209	112975122	-	3905	protein_coding	CD200 receptor 1 [Source:HGNC Symbol;Acc:HGNC:24235]	-	7	27	0.103431	0.337626
ENSG00000188833	-1.66978	3.18166	0.0340884	0.39298	ENTPD8	9	137434364	137441816	-	2836	protein_coding	ectonucleoside triphosphate diphosphohydrolase 8 [Source:HGNC Symbol;Acc:HGNC:24860]	-	6	24	0.122073	0.413236
ENSG00000108556	1.61714	3.06766	0.0340884	0.39298	CHRNE	17	4897774	4934438	-	2864	protein_coding	cholinergic receptor nicotinic epsilon subunit [Source:HGNC Symbol;Acc:HGNC:1966]	-	20	8	0.402932	0.136399
ENSG00000015479	1.11594	2.16736	0.0341653	0.39298	MATR3	5	139293648	139331677	+	12090	protein_coding	matrin 3 [Source:HGNC Symbol;Acc:HGNC:6912]	-	56	32	0.267262	0.129246
ENSG00000039139	-1.16547	2.24306	0.0347185	0.39298	DNAH5	5	13690331	13944543	-	16475	protein_coding	dynein axonemal heavy chain 5 [Source:HGNC Symbol;Acc:HGNC:2950]	-	24	67	0.0840545	0.198583
ENSG00000105982	1.02505	2.03503	0.0348202	0.39298	RNF32	7	156640281	156677130	+	4371	protein_coding	ring finger protein 32 [Source:HGNC Symbol;Acc:HGNC:17118]	-	87	53	1.14845	0.59209
ENSG00000138028	1.27162	2.41432	0.0348426	0.39298	CGREF1	2	27098889	27119115	-	4039	protein_coding	cell growth regulator with EF-hand domain 1 [Source:HGNC Symbol;Acc:HGNC:16962]	-	41	21	0.585713	0.253886
ENSG00000173991	-1.239	2.36035	0.0348426	0.39298	TCAP	17	39664187	39666555	+	2123	protein_coding	titin-cap [Source:HGNC Symbol;Acc:HGNC:11610]	-	17	50	0.462034	1.15004
ENSG00000234338	1.20493	2.30527	0.0348426	0.39298	AC073349.2	7	64835280	64836882	-	1603	processed_pseudogene	endogenous retroviral family W, env(C7), member 2 (ERVWE2) pseudogene	-	41	22	1.47579	0.670165
ENSG00000149289	3.14483	8.84483	0.0348666	0.39298	ZC3H12C	11	110093361	110171841	+	9719	protein_coding	zinc finger CCCH-type containing 12C [Source:HGNC Symbol;Acc:HGNC:29362]	-	8	1	0.0474945	0.00502425
ENSG00000149243	3.14483	8.84483	0.0348666	0.39298	KLHL35	11	75422394	75430629	-	5041	protein_coding	kelch like family member 35 [Source:HGNC Symbol;Acc:HGNC:26597]	-	8	1	0.0915689	0.00968671
ENSG00000117971	-2.87726	7.34755	0.0348666	0.39298	CHRNB4	15	78624119	78727754	-	4976	protein_coding	cholinergic receptor nicotinic beta 4 subunit [Source:HGNC Symbol;Acc:HGNC:1964]	-	1	10	0.0115956	0.0981324
ENSG00000205978	-2.87726	7.34755	0.0348666	0.39298	NYNRIN	14	24398786	24419288	+	7955	protein_coding	NYN domain and retroviral integrase containing [Source:HGNC Symbol;Acc:HGNC:20165]	-	1	10	0.00725328	0.0613836
ENSG00000175229	-2.87726	7.34755	0.0348666	0.39298	GAL3ST3	11	66041952	66049180	-	2481	protein_coding	galactose-3-O-sulfotransferase 3 [Source:HGNC Symbol;Acc:HGNC:24144]	-	1	10	0.0232567	0.196819
ENSG00000196074	3.14483	8.84483	0.0348666	0.39298	SYCP2	20	59863563	59933655	-	6466	protein_coding	synaptonemal complex protein 2 [Source:HGNC Symbol;Acc:HGNC:11490]	-	8	1	0.0713887	0.00755192
ENSG00000246308	-2.87726	7.34755	0.0348666	0.39298	AC116535.1	11	10809297	10822931	+	2335	antisense	uncharacterized LOC101928053 [Source:NCBI gene;Acc:101928053]	-	1	10	0.0247109	0.209125
ENSG00000135423	3.14483	8.84483	0.0348666	0.39298	GLS2	12	56470944	56488414	-	4141	protein_coding	glutaminase 2 [Source:HGNC Symbol;Acc:HGNC:29570]	-	8	1	0.11147	0.011792
ENSG00000183833	-2.87726	7.34755	0.0348666	0.39298	MAATS1	3	119703022	119767102	+	7106	protein_coding	MYCBP associated and testis expressed 1 [Source:HGNC Symbol;Acc:HGNC:24010]	-	1	10	0.00811988	0.0687176
ENSG00000229388	3.14483	8.84483	0.0348666	0.39298	LINC01715	1	28643228	28648581	+	978	lincRNA	long intergenic non-protein coding RNA 1715 [Source:HGNC Symbol;Acc:HGNC:52502]	-	8	1	0.471983	0.0499291
ENSG00000247595	3.14483	8.84483	0.0348666	0.39298	SPTY2D1OS	11	18588781	18610255	+	2283	protein_coding	SPTY2D1 opposite strand [Source:HGNC Symbol;Acc:HGNC:44122]	-	8	1	0.20219	0.0213888
ENSG00000113212	3.14483	8.84483	0.0348666	0.39298	PCDHB7	5	141172619	141176383	+	3765	protein_coding	protocadherin beta 7 [Source:HGNC Symbol;Acc:HGNC:8692]	-	8	1	0.122603	0.0129696
ENSG00000285091	3.14483	8.84483	0.0348666	0.39298	AL109840.2	20	58916000	58981169	-	1925	bidirectional_promoter_lncRNA	novel transcript	-	8	1	0.239792	0.0253666
ENSG00000263597	-2.87726	7.34755	0.0348666	0.39298	MIR3936	5	132365490	132365599	-	110	miRNA	microRNA 3936 [Source:HGNC Symbol;Acc:HGNC:38947]	-	1	10	0.524544	4.43915
ENSG00000204173	-2.87726	7.34755	0.0348666	0.39298	LRRC37A5P	9	111602831	111631289	-	2324	transcribed_unprocessed_pseudogene	leucine rich repeat containing 37 member A5, pseudogene [Source:HGNC Symbol;Acc:HGNC:23369]	-	1	10	0.0248278	0.210115
ENSG00000264304	3.14483	8.84483	0.0348666	0.39298	AC024267.3	17	28892469	28893342	+	562	antisense	novel transcript, antisense to FLOT2	-	8	1	0.821351	0.0868874
ENSG00000251442	3.14483	8.84483	0.0348666	0.39298	LINC01094	4	78645903	78682699	+	2951	lincRNA	long intergenic non-protein coding RNA 1094 [Source:HGNC Symbol;Acc:HGNC:49219]	-	8	1	0.156421	0.0165472
ENSG00000252481	3.14483	8.84483	0.0348666	0.39298	SCARNA13	14	95533355	95533629	-	275	scaRNA	small Cajal body-specific RNA 13 [Source:HGNC Symbol;Acc:HGNC:32570]	-	8	1	1.67854	0.177566
ENSG00000247853	-2.87726	7.34755	0.0348666	0.39298	AC006064.2	12	6578622	6584739	+	2196	antisense	novel transcript, antisense to CHD4	-	1	10	0.026275	0.222362
ENSG00000210117	3.14483	8.84483	0.0348666	0.39298	MT-TW	MT	5512	5579	+	68	Mt_tRNA	mitochondrially encoded tRNA tryptophan [Source:HGNC Symbol;Acc:HGNC:7501]	-	8	1	6.78822	0.718098
ENSG00000251303	-2.87726	7.34755	0.0348666	0.39298	CAB39P1	5	60630514	60630973	+	460	processed_pseudogene	calcium binding protein 39 pseudogene 1 [Source:HGNC Symbol;Acc:HGNC:51641]	-	1	10	0.125435	1.06154
ENSG00000265791	3.14483	8.84483	0.0348666	0.39298	AC127024.4	17	30781493	30782221	-	308	sense_intronic	novel transcript, sense intronic CRLF3	-	8	1	1.4987	0.158541
ENSG00000254477	-2.87726	7.34755	0.0348666	0.39298	AP000640.1	11	59752578	59754975	-	1962	processed_transcript	novel transcript	-	1	10	0.0294087	0.248882
ENSG00000257185	-2.87726	7.34755	0.0348666	0.39298	LINC02293	14	26809417	26836458	+	853	lincRNA	long intergenic non-protein coding RNA 2293 [Source:HGNC Symbol;Acc:HGNC:53209]	-	1	10	0.0676435	0.572458
ENSG00000132321	-2.87726	7.34755	0.0348666	0.39298	IQCA1	2	236324147	236507542	-	5975	protein_coding	IQ motif containing with AAA domain 1 [Source:HGNC Symbol;Acc:HGNC:26195]	-	1	10	0.00965688	0.081725
ENSG00000212371	3.14483	8.84483	0.0348666	0.39298	RF00404	14	77466284	77466436	+	153	snoRNA		-	8	1	3.01699	0.319155
ENSG00000234175	-2.87726	7.34755	0.0348666	0.39298	AL355355.2	10	13139196	13139533	-	338	processed_pseudogene	pseudogene similar to part of chromodomain protein, Y chromosome, 1 (CDY1)	-	1	10	0.17071	1.4447
ENSG00000253972	3.14483	8.84483	0.0348666	0.39298	MAL2-AS1	8	119215111	119246848	-	1515	lincRNA	MAL2 antisense RNA 1 [Source:HGNC Symbol;Acc:HGNC:53626]	-	8	1	0.304686	0.0322315
ENSG00000256115	3.14483	8.84483	0.0348666	0.39298	LINC02443	12	5233997	5243151	-	1393	lincRNA	long intergenic non-protein coding RNA 2443 [Source:HGNC Symbol;Acc:HGNC:53375]	-	8	1	0.33137	0.0350543
ENSG00000165841	-2.87726	7.34755	0.0348666	0.39298	CYP2C19	10	94762681	94853205	+	3921	protein_coding	cytochrome P450 family 2 subfamily C member 19 [Source:HGNC Symbol;Acc:HGNC:2621]	-	1	10	0.0147156	0.124536
ENSG00000272727	3.14483	8.84483	0.0348666	0.39298	LINC02266	4	145335263	145340421	-	1151	lincRNA	long intergenic non-protein coding RNA 2266 [Source:HGNC Symbol;Acc:HGNC:53180]	-	8	1	0.401042	0.0424246
ENSG00000176515	-2.87726	7.34755	0.0348666	0.39298	AL033381.1	6	1079929	1104946	+	3435	lincRNA	novel transcript	-	1	10	0.0167976	0.142156
ENSG00000255221	-2.87726	7.34755	0.0348666	0.39298	CARD17	11	105092469	105101431	-	1232	protein_coding	caspase recruitment domain family member 17 [Source:HGNC Symbol;Acc:HGNC:33827]	-	1	10	0.0468343	0.396353
ENSG00000267363	-2.87726	7.34755	0.0348666	0.39298	AC092296.3	19	36379351	36380912	-	249	lincRNA	novel transcript	-	1	10	0.231726	1.96107
ENSG00000268635	3.14483	8.84483	0.0348666	0.39298	AP003680.1	11	77473371	77477030	+	3660	antisense	novel transcript, antisense to PAK1	-	8	1	0.12612	0.0133417
ENSG00000233419	3.14483	8.84483	0.0348666	0.39298	AL121994.1	1	25125053	25125454	-	402	processed_pseudogene	interferon induced transmembrane protein pseudogene	-	8	1	1.14826	0.121469
ENSG00000201654	3.14483	8.84483	0.0348666	0.39298	RNU6-7	14	32202045	32202151	+	107	snRNA	RNA, U6 small nuclear 7 [Source:HGNC Symbol;Acc:HGNC:34284]	-	8	1	4.31401	0.456362
ENSG00000233270	1.0657	2.09319	0.0350671	0.394857	SNRPEP4	19	5576660	5576938	-	279	processed_pseudogene	small nuclear ribonucleoprotein polypeptide E pseudogene 4 [Source:HGNC Symbol;Acc:HGNC:43446]	-	76	45	15.7175	7.87592
ENSG00000138109	-1.13084	2.18987	0.0352672	0.396596	CYP2C9	10	94938658	94989391	+	3358	protein_coding	cytochrome P450 family 2 subfamily C member 9 [Source:HGNC Symbol;Acc:HGNC:2623]	-	29	79	0.498302	1.14879
ENSG00000118514	-1.00843	2.01172	0.0354213	0.397736	ALDH8A1	6	134917390	134950122	-	2868	protein_coding	aldehyde dehydrogenase 8 family member A1 [Source:HGNC Symbol;Acc:HGNC:15471]	-	52	130	1.04616	2.21339
ENSG00000280195	1.26959	2.41092	0.035482	0.397795	AC245140.2	X	154396878	154398816	-	1939	antisense	novel transcript, antisense to RPL10	-	39	20	1.16054	0.503669
ENSG00000007952	1.26959	2.41092	0.035482	0.397795	NOX1	X	100843324	100874345	-	2529	protein_coding	NADPH oxidase 1 [Source:HGNC Symbol;Acc:HGNC:7889]	-	39	20	0.889797	0.386166
ENSG00000162460	-1.26715	2.40686	0.035482	0.397795	TMEM82	1	15742422	15747982	+	1520	protein_coding	transmembrane protein 82 [Source:HGNC Symbol;Acc:HGNC:32350]	-	16	48	0.607367	1.54202
ENSG00000095596	-1.26676	2.40621	0.0361572	0.403613	CYP26A1	10	93073475	93077890	+	2972	protein_coding	cytochrome P450 family 26 subfamily A member 1 [Source:HGNC Symbol;Acc:HGNC:2603]	-	15	45	0.291217	0.739361
ENSG00000196139	-1.00849	2.0118	0.036577	0.407908	AKR1C3	10	5035354	5107686	+	4532	protein_coding	aldo-keto reductase family 1 member C3 [Source:HGNC Symbol;Acc:HGNC:386]	-	54	135	0.68751	1.45458
ENSG00000233461	1.0206	2.02876	0.0366819	0.408882	AL445524.1	1	231522388	231528556	-	1021	antisense	novel transcript	-	90	55	5.08618	2.63045
ENSG00000273055	1.26484	2.403	0.0368698	0.410386	AC005046.1	7	107942116	107942740	+	625	antisense	novel transcript, antisense to LAMB1	-	35	18	3.23119	1.40632
ENSG00000280114	1.16185	2.23744	0.0372812	0.413975	AL021920.2	1	16681097	16688749	-	1351	unprocessed_pseudogene	phosphodiesterase 4D interacting protein (myomegalin) (PDE4DIP) pseudogene	-	47	26	2.00732	0.939747
ENSG00000159618	-1.33771	2.52749	0.0376208	0.416156	ADGRG5	16	57542421	57591681	+	5852	protein_coding	adhesion G protein-coupled receptor G5 [Source:HGNC Symbol;Acc:HGNC:19010]	-	13	41	0.128178	0.342115
ENSG00000228305	1.08992	2.12862	0.0377926	0.417278	AC016734.1	2	63622178	63622831	-	654	processed_pseudogene	PRELI domain containing 1 (PRELID1) pseudogene	-	67	39	5.91115	2.91192
ENSG00000233452	1.15554	2.22768	0.0380252	0.417645	STXBP5-AS1	6	146841901	147204614	-	6011	antisense	STXBP5 antisense RNA 1 [Source:HGNC Symbol;Acc:HGNC:44183]	-	45	25	0.431957	0.203089
ENSG00000089199	1.09	2.12874	0.0383872	0.417645	CHGB	20	5911430	5925361	+	4535	protein_coding	chromogranin B [Source:HGNC Symbol;Acc:HGNC:1930]	-	55	32	0.699778	0.344561
ENSG00000132881	-1.12817	2.18582	0.0383872	0.417645	CPLANE2	1	16231700	16237162	-	1545	protein_coding	ciliogenesis and planar polarity effector 2 [Source:HGNC Symbol;Acc:HGNC:28127]	-	25	68	0.933655	2.14918
ENSG00000184923	1.30453	2.47004	0.0384107	0.417645	NUTM2A	10	87225448	87236908	+	5082	protein_coding	NUT family member 2A [Source:HGNC Symbol;Acc:HGNC:23438]	-	32	16	0.363321	0.153737
ENSG00000228626	1.30453	2.47004	0.0384107	0.417645	AC245100.3	1	148288001	148288951	-	285	unprocessed_pseudogene	novel pseudogene	-	32	16	6.47858	2.74137
ENSG00000198822	-1.10023	2.14389	0.0384283	0.417645	GRM3	7	86643914	86864884	+	4474	protein_coding	glutamate metabotropic receptor 3 [Source:HGNC Symbol;Acc:HGNC:4595]	-	30	80	0.386901	0.873146
ENSG00000225544	1.14869	2.21712	0.0388178	0.417645	AC245452.2	22	21885282	21885673	-	392	processed_pseudogene	pseudogene similar to part of metallophosphoesterase 1 (MPPE1)	-	43	24	6.32932	2.98963
ENSG00000120262	-1.1125	2.1622	0.0391002	0.417645	CCDC170	6	151494030	151621193	+	5419	protein_coding	coiled-coil domain containing 170 [Source:HGNC Symbol;Acc:HGNC:21177]	-	29	78	0.308783	0.702859
ENSG00000171368	-1.38953	2.61994	0.0392385	0.417645	TPPP	5	659862	693395	-	6022	protein_coding	tubulin polymerization promoting protein [Source:HGNC Symbol;Acc:HGNC:24164]	-	11	36	0.105397	0.291914
ENSG00000180769	-1.42891	2.69243	0.0392385	0.417645	WDFY3-AS2	4	84965682	85011277	+	6203	processed_transcript	WDFY3 antisense RNA 2 [Source:HGNC Symbol;Acc:HGNC:21603]	-	11	37	0.102321	0.291268
ENSG00000207547	1.30404	2.4692	0.0392385	0.417645	MIR25	7	100093560	100093643	-	84	miRNA	microRNA 25 [Source:HGNC Symbol;Acc:HGNC:31609]	-	30	15	20.6071	8.71977
ENSG00000269976	-1.38953	2.61994	0.0392385	0.417645	AC012065.3	2	20586248	20586686	-	439	lincRNA	novel transcript	-	11	36	1.44578	4.00434
ENSG00000164953	-1.00244	2.00338	0.0392528	0.417645	TMEM67	8	93754844	93819234	+	8281	protein_coding	transmembrane protein 67 [Source:HGNC Symbol;Acc:HGNC:28396]	-	49	122	0.341419	0.719399
ENSG00000254815	-1.04439	2.06249	0.0393026	0.417645	AP006284.1	11	557595	560107	+	2418	antisense	novel transcript	-	39	100	0.930643	2.01947
ENSG00000169989	1.30348	2.46824	0.0401014	0.417645	TIGD4	4	152769354	152779764	-	2472	protein_coding	tigger transposable element derived 4 [Source:HGNC Symbol;Acc:HGNC:18335]	-	28	14	0.653559	0.276549
ENSG00000256294	-1.01479	2.02061	0.0401334	0.417645	ZNF225	19	44112181	44134816	+	7226	protein_coding	zinc finger protein 225 [Source:HGNC Symbol;Acc:HGNC:13018]	zf-C2H2	43	108	0.343357	0.729825
ENSG00000278272	1.23609	2.3556	0.0405677	0.417645	HIST1H3C	6	26045411	26045821	+	411	protein_coding	histone cluster 1 H3 family member c [Source:HGNC Symbol;Acc:HGNC:4768]	-	40	21	5.61556	2.495
ENSG00000233673	-1.20994	2.31328	0.0405677	0.417645	ANAPC1P1	2	86861825	86912978	+	2553	transcribed_unprocessed_pseudogene	anaphase promoting complex subunit 1 pseudogene 1 [Source:HGNC Symbol;Acc:HGNC:44150]	-	17	49	0.384214	0.937213
ENSG00000100036	-1.06048	2.08562	0.0409575	0.417645	SLC35E4	22	30635652	30669016	+	5531	protein_coding	solute carrier family 35 member E4 [Source:HGNC Symbol;Acc:HGNC:17058]	-	32	83	0.333827	0.732769
ENSG00000142794	-5.47032	44.3333	0.0409646	0.417645	NBPF3	1	21440128	21485005	+	6812	protein_coding	NBPF member 3 [Source:HGNC Symbol;Acc:HGNC:25076]	-	0	6	0	0.04301
ENSG00000171435	-5.68806	51.5555	0.0409646	0.417645	KSR2	12	117453012	117968983	-	18294	protein_coding	kinase suppressor of ras 2 [Source:HGNC Symbol;Acc:HGNC:18610]	-	0	7	0	0.0186845
ENSG00000188766	-5.47032	44.3333	0.0409646	0.417645	SPRED3	19	38388421	38399587	+	5864	protein_coding	sprouty related EVH1 domain containing 3 [Source:HGNC Symbol;Acc:HGNC:31041]	-	0	6	0	0.0499632
ENSG00000197863	-5.68806	51.5555	0.0409646	0.417645	ZNF790	19	36817428	36850787	-	3851	protein_coding	zinc finger protein 790 [Source:HGNC Symbol;Acc:HGNC:33114]	zf-C2H2	0	7	0	0.08876
ENSG00000146054	-5.47032	44.3333	0.0409646	0.417645	TRIM7	5	181193924	181205293	-	7338	protein_coding	tripartite motif containing 7 [Source:HGNC Symbol;Acc:HGNC:16278]	-	0	6	0	0.039927
ENSG00000143816	-5.47032	44.3333	0.0409646	0.417645	WNT9A	1	227918656	227947898	-	3971	protein_coding	Wnt family member 9A [Source:HGNC Symbol;Acc:HGNC:12778]	-	0	6	0	0.0737809
ENSG00000106006	-5.47032	44.3333	0.0409646	0.417645	HOXA6	7	27145396	27150603	-	1285	protein_coding	homeobox A6 [Source:HGNC Symbol;Acc:HGNC:5107]	Homeobox	0	6	0	0.228003
ENSG00000240990	-5.68806	51.5555	0.0409646	0.417645	HOXA11-AS	7	27184507	27189298	+	3128	antisense	HOXA11 antisense RNA [Source:HGNC Symbol;Acc:HGNC:24957]	-	0	7	0	0.109276
ENSG00000233483	-5.68806	51.5555	0.0409646	0.417645	AC008105.2	17	45245186	45251129	-	1649	transcribed_unitary_pseudogene	novel pseudogene, ortholog of 1700023F06Rik (M. musculus)	-	0	7	0	0.207286
ENSG00000234546	-5.47032	44.3333	0.0409646	0.417645	LNCTAM34A	1	9182004	9196284	+	1662	lincRNA	long non coding transcriptional activator of miR34a [Source:HGNC Symbol;Acc:HGNC:52548]	-	0	6	0	0.176284
ENSG00000250012	-5.68806	51.5555	0.0409646	0.417645	AC079848.1	3	126084220	126095349	+	645	antisense	novel transcript	-	0	7	0	0.529945
ENSG00000284308	-5.68806	51.5555	0.0409646	0.417645	C2orf81	2	74414176	74421591	-	2995	protein_coding	chromosome 2 open reading frame 81 [Source:HGNC Symbol;Acc:HGNC:34350]	-	0	7	0	0.114128
ENSG00000135063	-5.47032	44.3333	0.0409646	0.417645	FAM189A2	9	69324567	69392558	+	9552	protein_coding	family with sequence similarity 189 member A2 [Source:HGNC Symbol;Acc:HGNC:24820]	-	0	6	0	0.0306725
ENSG00000182218	-5.47032	44.3333	0.0409646	0.417645	HHIPL1	14	99645110	99680569	+	7836	protein_coding	HHIP like 1 [Source:HGNC Symbol;Acc:HGNC:19710]	-	0	6	0	0.0373895
ENSG00000186952	-5.47032	44.3333	0.0409646	0.417645	TMEM232	5	110289233	110738956	-	9563	protein_coding	transmembrane protein 232 [Source:HGNC Symbol;Acc:HGNC:37270]	-	0	6	0	0.0306373
ENSG00000261366	-5.47032	44.3333	0.0409646	0.417645	MANEA-DT	6	95575183	95577450	-	2268	antisense	MANEA divergent transcript [Source:HGNC Symbol;Acc:HGNC:43732]	-	0	6	0	0.129182
ENSG00000162723	-5.47032	44.3333	0.0409646	0.417645	SLAMF9	1	159951492	159954254	-	1156	protein_coding	SLAM family member 9 [Source:HGNC Symbol;Acc:HGNC:18430]	-	0	6	0	0.253446
ENSG00000173535	-5.68806	51.5555	0.0409646	0.417645	TNFRSF10C	8	23102590	23117437	+	1868	protein_coding	TNF receptor superfamily member 10c [Source:HGNC Symbol;Acc:HGNC:11906]	-	0	7	0	0.182984
ENSG00000253508	-5.68806	51.5555	0.0409646	0.417645	AC004080.2	7	27186573	27193448	-	556	lincRNA	novel transcript	-	0	7	0	0.614775
ENSG00000228915	-5.47032	44.3333	0.0409646	0.417645	OR7E128P	11	71893410	71894433	+	1024	unprocessed_pseudogene	olfactory receptor family 7 subfamily E member 128 pseudogene [Source:HGNC Symbol;Acc:HGNC:15305]	-	0	6	0	0.286117
ENSG00000228487	-5.47032	44.3333	0.0409646	0.417645	AL450263.1	9	127213783	127221907	-	649	antisense	novel transcript, antisense to RALGPS1	-	0	6	0	0.451439
ENSG00000226363	-5.47032	44.3333	0.0409646	0.417645	HAGLROS	2	176177717	176179008	+	1121	lincRNA	HAGLR opposite strand lncRNA [Source:HGNC Symbol;Acc:HGNC:50646]	-	0	6	0	0.26136
ENSG00000248027	-5.68806	51.5555	0.0409646	0.417645	AP001351.1	11	100684162	100687955	-	1865	antisense	uncharacterized LOC100128386 [Source:NCBI gene;Acc:100128386]	-	0	7	0	0.183279
ENSG00000259520	-5.47032	44.3333	0.0409646	0.417645	AC051619.5	15	45251580	45279251	-	1455	antisense	novel transcript, antisense to SLC28A2	-	0	6	0	0.201364
ENSG00000198976	-5.68806	51.5555	0.0409646	0.417645	MIR429	1	1169005	1169087	+	83	miRNA	microRNA 429 [Source:HGNC Symbol;Acc:HGNC:13784]	-	0	7	0	4.11825
ENSG00000254859	-5.47032	44.3333	0.0409646	0.417645	AC067930.4	8	143541973	143549729	-	498	antisense	novel transcript	-	0	6	0	0.588322
ENSG00000276564	-5.68806	51.5555	0.0409646	0.417645	AC130650.2	16	14150833	14153235	+	2403	lincRNA	novel transcript	-	0	7	0	0.142245
ENSG00000285922	-5.47032	44.3333	0.0409646	0.417645	AC104453.1	1	98052077	98054592	-	1784	lincRNA	novel transcript	-	0	6	0	0.164229
ENSG00000204876	-5.47032	44.3333	0.0409646	0.417645	AC021218.1	7	155962632	155966343	+	2536	lincRNA	uncharacterized LOC389602 [Source:NCBI gene;Acc:389602]	-	0	6	0	0.11553
ENSG00000170166	-5.68806	51.5555	0.0409646	0.417645	HOXD4	2	176151222	176153226	+	1464	protein_coding	homeobox D4 [Source:HGNC Symbol;Acc:HGNC:5138]	Homeobox	0	7	0	0.23348
ENSG00000284959	-5.68806	51.5555	0.0409646	0.417645	AC007262.2	14	81012099	81170414	-	8011	antisense	uncharacterized LOC101928462 [Source:NCBI gene;Acc:101928462]	-	0	7	0	0.0426682
ENSG00000257283	-5.47032	44.3333	0.0409646	0.417645	AC012464.1	12	93894965	93943603	-	540	antisense	uncharacterized LOC105369911 [Source:NCBI gene;Acc:105369911]	-	0	6	0	0.542563
ENSG00000150337	-5.68806	51.5555	0.0409646	0.417645	FCGR1A	1	149782671	149792518	+	2998	protein_coding	Fc fragment of IgG receptor Ia [Source:HGNC Symbol;Acc:HGNC:3613]	-	0	7	0	0.114014
ENSG00000165182	-5.68806	51.5555	0.0409646	0.417645	CXorf58	X	23907801	23939509	+	2050	protein_coding	chromosome X open reading frame 58 [Source:HGNC Symbol;Acc:HGNC:26356]	-	0	7	0	0.166739
ENSG00000272432	-5.47032	44.3333	0.0409646	0.417645	AL031432.3	1	25247837	25248321	+	485	lincRNA	novel transcript	-	0	6	0	0.604091
ENSG00000120051	-5.47032	44.3333	0.0409646	0.417645	CFAP58	10	104353764	104455090	+	3548	protein_coding	cilia and flagella associated protein 58 [Source:HGNC Symbol;Acc:HGNC:26676]	-	0	6	0	0.0825773
ENSG00000184956	-5.47032	44.3333	0.0409646	0.417645	MUC6	11	1012821	1036706	-	8428	protein_coding	mucin 6, oligomeric mucus/gel-forming [Source:HGNC Symbol;Acc:HGNC:7517]	-	0	6	0	0.0347632
ENSG00000233296	-5.47032	44.3333	0.0409646	0.417645	AC092159.2	2	677186	697371	+	2298	antisense	uncharacterized LOC105373354 [Source:NCBI gene;Acc:105373354]	-	0	6	0	0.127495
ENSG00000269296	-5.47032	44.3333	0.0409646	0.417645	AC005614.1	19	40090754	40094406	+	3653	antisense	novel transcript, antisense to ZNF780A	-	0	6	0	0.0802037
ENSG00000229525	-5.68806	51.5555	0.0409646	0.417645	AC053503.2	2	219388496	219403633	+	1598	antisense	uncharacterized LOC105373884 [Source:NCBI gene;Acc:105373884]	-	0	7	0	0.213902
ENSG00000260490	-5.68806	51.5555	0.0409646	0.417645	MYL12BP1	15	42571927	42572433	+	507	processed_pseudogene	myosin light chain 12B pseudogene 1 [Source:HGNC Symbol;Acc:HGNC:51649]	-	0	7	0	0.674191
ENSG00000154975	-5.47032	44.3333	0.0409646	0.417645	CA10	17	51630313	52160017	-	4450	protein_coding	carbonic anhydrase 10 [Source:HGNC Symbol;Acc:HGNC:1369]	-	0	6	0	0.0658391
ENSG00000219642	-5.47032	44.3333	0.0409646	0.417645	BMPR1AP1	6	129157523	129159120	-	1598	processed_pseudogene	bone morphogenetic protein receptor type 1A pseudogene 1 [Source:HGNC Symbol;Acc:HGNC:21742]	-	0	6	0	0.183344
ENSG00000285732	-5.47032	44.3333	0.0409646	0.417645	AC121334.3	12	39611819	39614648	+	2503	antisense	novel transcript, antisense to ABCD2	-	0	6	0	0.117053
ENSG00000270578	-5.47032	44.3333	0.0409646	0.417645	AP000787.2	11	95145437	95146004	+	568	processed_pseudogene	splicing factor 3a, subunit 2, 66kDa, pseudogene	-	0	6	0	0.515817
ENSG00000128422	-5.68806	51.5555	0.0409646	0.417645	KRT17	17	41619441	41624842	-	3130	protein_coding	keratin 17 [Source:HGNC Symbol;Acc:HGNC:6427]	-	0	7	0	0.109206
ENSG00000272343	-5.47032	44.3333	0.0409646	0.417645	AC107952.2	8	56222688	56223173	+	486	lincRNA	novel transcript	-	0	6	0	0.602848
ENSG00000125997	-5.68806	51.5555	0.0409646	0.417645	BPIFB9P	20	33347720	33354444	+	1611	transcribed_unitary_pseudogene	BPI fold containing family B member 9, pseudogene [Source:HGNC Symbol;Acc:HGNC:16109]	-	0	7	0	0.212176
ENSG00000256250	-5.47032	44.3333	0.0409646	0.417645	AC073912.1	12	130810606	130812438	+	587	lincRNA	novel transcript	-	0	6	0	0.499121
ENSG00000276809	-5.47032	44.3333	0.0409646	0.417645	AL138955.1	13	95744726	95745765	+	1040	sense_intronic	novel transcript, sense intronic to DNAJC3	-	0	6	0	0.281716
ENSG00000277948	-5.47032	44.3333	0.0409646	0.417645	RF02271	2	175092401	175092587	-	187	misc_RNA		-	0	6	0	1.56676
ENSG00000204625	-5.47032	44.3333	0.0409646	0.417645	HCG9	6	29975112	29978410	+	700	lincRNA	HLA complex group 9 [Source:HGNC Symbol;Acc:HGNC:21243]	-	0	6	0	0.418549
ENSG00000201684	-5.47032	44.3333	0.0409646	0.417645	RN7SKP239	11	67362414	67362708	+	295	misc_RNA	RNA, 7SK small nuclear pseudogene 239 [Source:HGNC Symbol;Acc:HGNC:45963]	-	0	6	0	0.993167
ENSG00000227193	-5.68806	51.5555	0.0409646	0.417645	AC244453.1	1	121118126	121146826	+	494	lincRNA	novel transcript	-	0	7	0	0.691933
ENSG00000253270	-5.47032	44.3333	0.0409646	0.417645	AC090541.1	8	19678572	19688934	+	467	lincRNA	novel transcript	-	0	6	0	0.627375
ENSG00000233421	-5.68806	51.5555	0.0409646	0.417645	LINC01783	1	16533886	16536172	-	2068	lincRNA	long intergenic non-protein coding RNA 1783 [Source:HGNC Symbol;Acc:HGNC:52573]	-	0	7	0	0.165288
ENSG00000234377	-5.68806	51.5555	0.0409646	0.417645	RNF219-AS1	13	77919689	78617328	+	8790	antisense	RNF219 antisense RNA 1 [Source:HGNC Symbol;Acc:HGNC:42700]	-	0	7	0	0.0388868
ENSG00000198483	-5.47032	44.3333	0.0409646	0.417645	ANKRD35	1	145866560	145885866	-	3363	protein_coding	ankyrin repeat domain 35 [Source:HGNC Symbol;Acc:HGNC:26323]	-	0	6	0	0.0871199
ENSG00000282849	-5.47032	44.3333	0.0409646	0.417645	AL359834.1	1	200478020	200483604	-	638	lincRNA	novel transcript	-	0	6	0	0.459223
ENSG00000260581	-5.47032	44.3333	0.0409646	0.417645	AC011374.1	5	151652275	151655449	+	1567	antisense	uncharacterized LOC105378231 [Source:NCBI gene;Acc:105378231]	-	0	6	0	0.186971
ENSG00000256552	-5.47032	44.3333	0.0409646	0.417645	AC092745.2	12	8320381	8369555	+	620	transcribed_processed_pseudogene	ribosomal protein S24 (RPS24) pseudogene	-	0	6	0	0.472555
ENSG00000179636	-5.47032	44.3333	0.0409646	0.417645	TPPP2	14	21024109	21036276	+	2475	protein_coding	tubulin polymerization promoting protein family member 2 [Source:HGNC Symbol;Acc:HGNC:19293]	-	0	6	0	0.118377
ENSG00000125804	-5.47032	44.3333	0.0409646	0.417645	FAM182A	20	26054655	26086917	+	5787	processed_transcript	family with sequence similarity 182 member A [Source:HGNC Symbol;Acc:HGNC:16222]	-	0	6	0	0.050628
ENSG00000189377	-5.68806	51.5555	0.0409646	0.417645	CXCL17	19	42428288	42443048	-	1189	protein_coding	C-X-C motif chemokine ligand 17 [Source:HGNC Symbol;Acc:HGNC:19232]	-	0	7	0	0.287481
ENSG00000242515	-5.68806	51.5555	0.0409646	0.417645	UGT1A10	2	233636454	233773305	+	3157	protein_coding	UDP glucuronosyltransferase family 1 member A10 [Source:HGNC Symbol;Acc:HGNC:12531]	-	0	7	0	0.108272
ENSG00000225101	-5.68806	51.5555	0.0409646	0.417645	OR52K3P	11	4393783	4476361	+	2160	transcribed_unprocessed_pseudogene	olfactory receptor family 52 subfamily K member 3 pseudogene [Source:HGNC Symbol;Acc:HGNC:15224]	-	0	7	0	0.158248
ENSG00000257219	-5.47032	44.3333	0.0409646	0.417645	LINC02407	12	76259839	76305131	+	1201	lincRNA	long intergenic non-protein coding RNA 2407 [Source:HGNC Symbol;Acc:HGNC:53336]	-	0	6	0	0.24395
ENSG00000183379	-5.68806	51.5555	0.0409646	0.417645	SYNDIG1L	14	74405893	74426102	-	2612	protein_coding	synapse differentiation inducing 1 like [Source:HGNC Symbol;Acc:HGNC:32388]	-	0	7	0	0.130863
ENSG00000267644	-5.68806	51.5555	0.0409646	0.417645	AC061975.7	17	28219285	28220005	+	721	lincRNA	novel transcript	-	0	7	0	0.474084
ENSG00000275025	-5.68806	51.5555	0.0409646	0.417645	AC002401.3	17	50098460	50098899	-	440	antisense	novel transcript, antisense to PDK2	-	0	7	0	0.776852
ENSG00000271963	-5.47032	44.3333	0.0409646	0.417645	AC026786.2	12	133115692	133122340	+	392	antisense	novel transcript, antisense to ZNF891	-	0	6	0	0.747409
ENSG00000136698	-5.47032	44.3333	0.0409646	0.417645	CFC1	2	130592168	130599575	-	1669	protein_coding	cripto, FRL-1, cryptic family 1 [Source:HGNC Symbol;Acc:HGNC:18292]	-	0	6	0	0.175545
ENSG00000225833	-5.68806	51.5555	0.0409646	0.417645	GS1-594A7.3	X	15602881	15621484	+	574	antisense	uncharacterized LOC104798195 [Source:NCBI gene;Acc:104798195]	-	0	7	0	0.595496
ENSG00000234575	-5.68806	51.5555	0.0409646	0.417645	CTSLP8	9	87844154	87847314	+	974	unprocessed_pseudogene	cathepsin L pseudogene 8 [Source:HGNC Symbol;Acc:HGNC:39084]	-	0	7	0	0.350939
ENSG00000237852	-5.47032	44.3333	0.0409646	0.417645	AC119800.1	1	65486406	65494188	+	423	sense_intronic	novel transcript	-	0	6	0	0.692634
ENSG00000271153	-5.47032	44.3333	0.0409646	0.417645	RPL23AP88	2	242175181	242175634	+	454	processed_pseudogene	ribosomal protein L23a pseudogene 88 [Source:HGNC Symbol;Acc:HGNC:51579]	-	0	6	0	0.64534
ENSG00000227825	-5.68806	51.5555	0.0409646	0.417645	SLC9A7P1	12	98453835	98457145	-	3311	transcribed_processed_pseudogene	solute carrier family 9 member 7 pseudogene 1 [Source:HGNC Symbol;Acc:HGNC:32679]	-	0	7	0	0.103236
ENSG00000256810	-5.47032	44.3333	0.0409646	0.417645	AC078925.1	12	131030570	131035487	-	568	lincRNA	novel transcript	-	0	6	0	0.515817
ENSG00000212743	-5.47032	44.3333	0.0409646	0.417645	AL137145.1	10	6350316	6352762	+	2447	lincRNA	novel transcript	-	0	6	0	0.119732
ENSG00000285630	-5.68806	51.5555	0.0409646	0.417645	AL590068.3	10	30587706	30591092	+	1817	lincRNA	uncharacterized LOC105376479 [Source:NCBI gene;Acc:105376479]	-	0	7	0	0.18812
ENSG00000240513	-5.68806	51.5555	0.0409646	0.417645	AL049830.2	14	30819714	30819914	+	201	processed_pseudogene	ribosomal protein L27 (RPL27) pseudogene	-	0	7	0	1.70057
ENSG00000177699	-5.47032	44.3333	0.0409646	0.417645	AC011944.1	15	78978889	78985926	+	1900	antisense	uncharacterized LOC100129540 [Source:NCBI gene;Acc:100129540]	-	0	6	0	0.154202
ENSG00000227158	-5.47032	44.3333	0.0409646	0.417645	AC073621.1	17	17422681	17423704	+	1024	processed_pseudogene	ligand of numb-protein X 1, E3 ubiquitin protein ligase pseudogene	-	0	6	0	0.286117
ENSG00000275285	-5.68806	51.5555	0.0409646	0.417645	AL391095.2	20	38378825	38383179	+	378	lincRNA	novel transcript	-	0	7	0	0.904272
ENSG00000233399	-5.47032	44.3333	0.0409646	0.417645	LINC01648	1	30013952	30037612	-	1519	lincRNA	long intergenic non-protein coding RNA 1648 [Source:HGNC Symbol;Acc:HGNC:52435]	-	0	6	0	0.19288
ENSG00000044012	-5.47032	44.3333	0.0409646	0.417645	GUCA2B	1	42153421	42155824	+	597	protein_coding	guanylate cyclase activator 2B [Source:HGNC Symbol;Acc:HGNC:4683]	-	0	6	0	0.490761
ENSG00000285783	-5.47032	44.3333	0.0409646	0.417645	AC098588.2	4	144111039	144870953	-	1902	processed_transcript	novel protein	-	0	6	0	0.15404
ENSG00000280236	-5.47032	44.3333	0.0409646	0.417645	OR12D2	6	29395631	29398008	+	1639	protein_coding	olfactory receptor family 12 subfamily D member 2 (gene/pseudogene) [Source:HGNC Symbol;Acc:HGNC:8178]	-	0	6	0	0.178758
ENSG00000244593	-5.47032	44.3333	0.0409646	0.417645	AC025062.1	8	18383274	18383917	-	644	processed_pseudogene	ribosomal protein L10a (RPL10A) pseudogene	-	0	6	0	0.454944
ENSG00000107447	-5.47032	44.3333	0.0409646	0.417645	DNTT	10	96304396	96338564	+	1972	protein_coding	DNA nucleotidylexotransferase [Source:HGNC Symbol;Acc:HGNC:2983]	-	0	6	0	0.148572
ENSG00000111046	-5.47032	44.3333	0.0409646	0.417645	MYF6	12	80707498	80709474	+	1465	protein_coding	myogenic factor 6 [Source:HGNC Symbol;Acc:HGNC:7566]	bHLH	0	6	0	0.199989
ENSG00000183549	-5.47032	44.3333	0.0409646	0.417645	ACSM5	16	20409534	20441336	+	3963	protein_coding	acyl-CoA synthetase medium chain family member 5 [Source:HGNC Symbol;Acc:HGNC:26060]	-	0	6	0	0.0739299
ENSG00000277837	-5.47032	44.3333	0.0409646	0.417645	AC090340.1	18	57427133	57432112	+	4980	lincRNA	novel transcript	-	0	6	0	0.0588322
ENSG00000175414	-1.35635	2.56037	0.0409935	0.417645	ARL10	5	176365468	176401865	+	11459	protein_coding	ADP ribosylation factor like GTPase 10 [Source:HGNC Symbol;Acc:HGNC:22042]	-	10	32	0.0503533	0.136363
ENSG00000235280	-1.35635	2.56037	0.0409935	0.417645	MCF2L-AS1	13	112967484	112968824	-	712	antisense	MCF2L antisense RNA 1 [Source:HGNC Symbol;Acc:HGNC:39825]	-	10	32	0.810392	2.19464
ENSG00000197162	1.41705	2.67038	0.0409935	0.417645	ZNF785	16	30573740	30585771	-	4952	protein_coding	zinc finger protein 785 [Source:HGNC Symbol;Acc:HGNC:26496]	zf-C2H2	26	12	0.302948	0.11833
ENSG00000269693	1.41705	2.67038	0.0409935	0.417645	AC010422.6	19	12525720	12580975	-	5857	protein_coding	novel transcript	zf-C2H2	26	12	0.256137	0.100046
ENSG00000124251	1.41705	2.67038	0.0409935	0.417645	TP53TG5	20	45372563	45407889	-	3040	protein_coding	TP53 target 5 [Source:HGNC Symbol;Acc:HGNC:15856]	-	26	12	0.493486	0.192753
ENSG00000212588	1.41705	2.67038	0.0409935	0.417645	SNORA26	4	52713249	52713370	+	122	snoRNA	small nucleolar RNA, H/ACA box 26 [Source:HGNC Symbol;Acc:HGNC:32616]	-	26	12	12.2967	4.80302
ENSG00000130653	-2.21127	4.63084	0.041032	0.417645	PNPLA7	9	137459953	137550534	-	9976	protein_coding	patatin like phospholipase domain containing 7 [Source:HGNC Symbol;Acc:HGNC:24768]	-	2	12	0.0115677	0.0587378
ENSG00000158825	-2.21127	4.63084	0.041032	0.417645	CDA	1	20588948	20618908	+	963	protein_coding	cytidine deaminase [Source:HGNC Symbol;Acc:HGNC:1712]	-	2	12	0.119834	0.608482
ENSG00000162068	-2.21127	4.63084	0.041032	0.417645	NTN3	16	2471499	2474145	+	1986	protein_coding	netrin 3 [Source:HGNC Symbol;Acc:HGNC:8030]	-	2	12	0.0581066	0.295049
[truncated: 100 more rows]
