# Supplementary material for: Culture of Cancer Cells at Physiological Oxygen Levels Affects Gene Expression in a Cell-Type Specific Manner
Source: Preprints.org preprint supplement (doi:10.20944/preprints202208.0497.v1), 2022-08-29
Supplement: Supplementary file 7 [file Table S3 DEG list PC-3.xlsx]

## Sheet: DEG PC-3 18% O2 vs 5% O2
Gene ID	log2FoldChange	Fold change	pvalue	padj	gene_name	gene_chr	gene_start	gene_end	gene_strand	gene_length	gene_biotype	gene_description	tf_family	Raw readcount 18% O2	Raw readout 5% O2	FPKM 18% O2	FPKM 5% O2
ENSG00000260075	5.32102	39.9748	1.01356e-13	2.3625e-09	NSFP1	17	46372855	46487141	+	1471	unprocessed_pseudogene	N-ethylmaleimide-sensitive factor pseudogene 1 [Source:HGNC Symbol;Acc:HGNC:31405]	-	107	3	4.29863	0.102787
ENSG00000274012	2.86297	7.27511	3.54064e-09	4.12643e-05	RN7SL2	14	49862550	49862849	-	300	misc_RNA	RNA, 7SL, cytoplasmic 2 [Source:HGNC Symbol;Acc:HGNC:23134]	-	293	47	57.7172	7.89602
ENSG00000236675	2.5951	6.0423	8.85169e-08	0.000687747	MTX1P1	1	155230975	155234325	+	838	unprocessed_pseudogene	metaxin 1 pseudogene 1 [Source:HGNC Symbol;Acc:HGNC:7505]	-	233	45	16.4312	2.70645
ENSG00000235070	-7.80461	223.574	1.08934e-06	0.00504587	AC062015.1	2	226180044	226185371	-	1134	lincRNA	novel transcript	-	0	30	0	1.33334
ENSG00000232060	5.04913	33.1085	1.29886e-06	0.00504587	SLC4A1APP1	9	30558880	30559481	-	602	processed_pseudogene	solute carrier family 4 member 1 adaptor protein pseudogene 1 [Source:HGNC Symbol;Acc:HGNC:49811]	-	32	1	3.14132	0.0837211
ENSG00000149451	-4.79163	27.6965	1.29886e-06	0.00504587	ADAM33	20	3667965	3682246	-	5834	protein_coding	ADAM metallopeptidase domain 33 [Source:HGNC Symbol;Acc:HGNC:15478]	-	1	36	0.0101296	0.311005
ENSG00000105419	7.76811	217.988	1.61305e-06	0.00537124	MEIS3	19	47403124	47419523	-	5122	protein_coding	Meis homeobox 3 [Source:HGNC Symbol;Acc:HGNC:29537]	Homeobox	25	0	0.288442	0
ENSG00000249456	3.22766	9.36749	6.09357e-06	0.0175588	AL731577.2	10	124917143	124942881	+	555	sense_overlapping	novel transcript, sense overlapping ZRANB1	-	41	5	4.36566	0.454055
ENSG00000185614	2.90589	7.49482	7.49803e-06	0.0175588	INKA1	3	49803254	49805030	+	1040	protein_coding	inka box actin regulator 1 [Source:HGNC Symbol;Acc:HGNC:32480]	-	52	8	2.9548	0.387693
ENSG00000225125	-4.57677	23.8641	7.53307e-06	0.0175588	RANP4	X	136807223	136807877	-	655	processed_pseudogene	RAN, member RAS oncogene family pseudogene 4 [Source:HGNC Symbol;Acc:HGNC:39859]	-	1	31	0.090223	2.38535
ENSG00000269289	-7.48429	179.059	1.26863e-05	0.0268823	AC011503.1	19	23919081	23957930	-	2233	antisense	uncharacterized LOC100505851 [Source:NCBI gene;Acc:100505851]	-	0	24	0	0.541694
ENSG00000167614	4.63582	24.8611	2.29623e-05	0.0446024	TTYH1	19	54415219	54436900	+	7068	protein_coding	tweety family member 1 [Source:HGNC Symbol;Acc:HGNC:13476]	-	24	1	0.200666	0.00713075
ENSG00000167077	-7.2928	156.802	3.04594e-05	0.0504987	MEI1	22	41699499	41799456	+	5393	protein_coding	meiotic double-stranded break formation protein 1 [Source:HGNC Symbol;Acc:HGNC:28613]	-	0	21	0	0.196255
ENSG00000224093	-4.37839	20.7982	3.36527e-05	0.0504987	AL109613.1	1	93592199	93605573	+	1954	antisense	novel transcript	-	1	27	0.0302436	0.696419
ENSG00000243710	-4.37839	20.7982	3.36527e-05	0.0504987	CFAP57	1	43172149	43254358	+	5764	protein_coding	cilia and flagella associated protein 57 [Source:HGNC Symbol;Acc:HGNC:26485]	-	1	27	0.0102526	0.236087
ENSG00000231890	-2.36563	5.15379	3.46639e-05	0.0504987	DARS-AS1	2	135985176	136022593	+	6566	antisense	DARS antisense RNA 1 [Source:HGNC Symbol;Acc:HGNC:40170]	-	15	91	0.135005	0.698509
ENSG00000173208	-7.22287	149.383	4.77659e-05	0.0602598	ABCD2	12	39550033	39619751	-	6238	protein_coding	ATP binding cassette subfamily D member 2 [Source:HGNC Symbol;Acc:HGNC:66]	-	0	20	0	0.161591
ENSG00000255423	-2.38696	5.23056	4.83045e-05	0.0602598	EBLN2	3	73061659	73063337	+	1679	protein_coding	endogenous Bornavirus like nucleoprotein 2 [Source:HGNC Symbol;Acc:HGNC:25493]	-	12	74	0.422366	2.22133
ENSG00000166922	-2.12356	4.35768	4.91199e-05	0.0602598	SCG5	15	32641676	32697098	+	2196	protein_coding	secretogranin V [Source:HGNC Symbol;Acc:HGNC:10816]	-	26	133	0.69968	3.05247
ENSG00000223459	2.04195	4.11802	5.44629e-05	0.0634738	TCAF1P1	7	143598039	143604839	+	2233	unprocessed_pseudogene	TRPM8 channel associated factor 1 pseudogene 1 [Source:HGNC Symbol;Acc:HGNC:33604]	-	113	32	2.99053	0.722259
ENSG00000080854	-3.22747	9.36626	5.88889e-05	0.0653639	IGSF9B	11	133908564	133956985	-	5753	protein_coding	immunoglobulin superfamily member 9B [Source:HGNC Symbol;Acc:HGNC:32326]	-	3	34	0.0308167	0.297863
ENSG00000204936	-7.14938	141.964	7.55368e-05	0.073913	CD177	19	43353659	43363172	+	2501	protein_coding	CD177 molecule [Source:HGNC Symbol;Acc:HGNC:30072]	-	0	19	0	0.382888
ENSG00000008438	-7.14938	141.964	7.55368e-05	0.073913	PGLYRP1	19	46019153	46023065	-	720	protein_coding	peptidoglycan recognition protein 1 [Source:HGNC Symbol;Acc:HGNC:8904]	-	0	19	0	1.33
ENSG00000254300	-2.38949	5.23972	7.64132e-05	0.073913	LINC01111	8	76406654	76524356	+	1663	lincRNA	long intergenic non-protein coding RNA 1111 [Source:HGNC Symbol;Acc:HGNC:49237]	-	11	68	0.390894	2.06086
ENSG00000130675	3.78276	13.7634	8.1742e-05	0.073913	MNX1	7	156994051	157010651	-	4202	protein_coding	motor neuron and pancreas homeobox 1 [Source:HGNC Symbol;Acc:HGNC:4979]	Homeobox	25	2	0.351595	0.0239886
ENSG00000275160	2.68115	6.41369	8.24462e-05	0.073913	AL354718.1	9	41479960	41480548	+	589	processed_pseudogene	ribosomal protein L7a (RPL7A) pseudogene	-	39	7	3.91298	0.598983
ENSG00000203650	-1.9497	3.86294	0.00010125	0.0824053	LINC01285	X	118839554	118919669	+	3861	lincRNA	long intergenic non-protein coding RNA 1285 [Source:HGNC Symbol;Acc:HGNC:50344]	-	32	145	0.489789	1.89278
ENSG00000209482	-2.6469	6.26321	0.000103342	0.0824053	SNORD83A	22	39315213	39315307	-	95	snoRNA	small nucleolar RNA, C/D box 83A [Source:HGNC Symbol;Acc:HGNC:17131]	-	7	52	4.35445	27.5874
ENSG00000279636	-2.88268	7.37521	0.000106371	0.0824053	LINC00216	14	58288033	58289158	+	1126	lincRNA	long intergenic non-protein coding RNA 216 [Source:NCBI gene;Acc:55451]	-	5	44	0.262416	1.96945
ENSG00000176563	-4.20936	18.4988	0.000109596	0.0824053	CNTD1	17	42798792	42811587	+	3378	protein_coding	cyclin N-terminal domain containing 1 [Source:HGNC Symbol;Acc:HGNC:26847]	-	1	24	0.0174944	0.358082
ENSG00000250519	-4.20936	18.4988	0.000109596	0.0824053	AP002784.1	11	94238150	94279206	+	723	lincRNA	novel transcript	-	1	24	0.0817373	1.67303
ENSG00000206838	-7.07194	134.545	0.000120499	0.0877723	SNORA5A	7	45104349	45104482	-	134	snoRNA	small nucleolar RNA, H/ACA box 5A [Source:HGNC Symbol;Acc:HGNC:32588]	-	0	18	0	6.77016
ENSG00000260924	-2.59047	6.02294	0.000129619	0.0915544	LINC01311	22	19171395	19172839	+	1445	antisense	long intergenic non-protein coding RNA 1311 [Source:HGNC Symbol;Acc:HGNC:50503]	-	7	50	0.286279	1.74395
ENSG00000242828	-3.26913	9.64065	0.000137915	0.0945487	AC068756.1	3	80761042	80788963	-	403	lincRNA	novel transcript	-	3	35	0.439921	4.37718
ENSG00000247982	-3.09476	8.54309	0.000154712	0.0999796	LINC00926	15	57300365	57307769	+	3669	lincRNA	long intergenic non-protein coding RNA 926 [Source:HGNC Symbol;Acc:HGNC:27514]	-	3	31	0.0483206	0.425839
ENSG00000271127	-4.08456	16.9658	0.000164371	0.0999796	AP000526.1	22	15796959	15798346	+	1388	sense_intronic	novel transcript	-	1	22	0.0425764	0.798849
ENSG00000236307	-4.08456	16.9658	0.000164371	0.0999796	EEF1E1P1	2	111887914	111888741	+	430	processed_pseudogene	eukaryotic translation elongation factor 1 epsilon 1 pseudogene 1 [Source:HGNC Symbol;Acc:HGNC:51459]	-	1	22	0.137433	2.57861
ENSG00000109743	3.66305	12.6674	0.000167283	0.0999796	BST1	4	15702950	15738313	+	2980	protein_coding	bone marrow stromal cell antigen 1 [Source:HGNC Symbol;Acc:HGNC:1118]	-	23	2	0.456111	0.0338256
ENSG00000261737	-3.4549	10.9655	0.000167283	0.0999796	AL049597.2	1	86703502	86704462	-	961	antisense	uncharacterized LOC105378828 [Source:NCBI gene;Acc:105378828]	-	2	27	0.122989	1.41603
ENSG00000196208	7.03555	131.193	0.000193974	0.105148	GREB1	2	11482341	11642788	+	12361	protein_coding	growth regulating estrogen receptor binding 1 [Source:HGNC Symbol;Acc:HGNC:24885]	-	15	0	0.0717127	0
ENSG00000261141	-6.99011	127.125	0.000193974	0.105148	AC092718.5	16	81055301	81056426	+	593	antisense	novel transcript, antisense to C16orf46	-	0	17	0	1.44486
ENSG00000232874	-6.99011	127.125	0.000193974	0.105148	AC080129.2	3	194130616	194131201	-	430	antisense	novel transcript	-	0	17	0	1.99256
ENSG00000230366	-6.99011	127.125	0.000193974	0.105148	DSCR9	21	37208503	37221736	+	1901	lincRNA	Down syndrome critical region 9 [Source:HGNC Symbol;Acc:HGNC:16301]	-	0	17	0	0.450711
ENSG00000147003	-1.68033	3.20501	0.000203829	0.107978	CLTRN	X	15627318	15675012	-	2009	protein_coding	collectrin, amino acid transport regulator [Source:HGNC Symbol;Acc:HGNC:29437]	-	93	349	2.73566	8.75542
ENSG00000101353	3.28482	9.74605	0.000214972	0.10893	MROH8	20	37101226	37179588	-	3878	protein_coding	maestro heat like repeat family member 8 [Source:HGNC Symbol;Acc:HGNC:16125]	-	26	3	0.396209	0.0389893
ENSG00000274333	-3.04766	8.2687	0.000214972	0.10893	CU633967.1	21	5553637	5614880	+	8756	lincRNA	uncharacterized LOC102724219 [Source:NCBI gene;Acc:102724219]	-	3	30	0.0202476	0.172682
ENSG00000146477	-3.40073	10.5614	0.000240916	0.119479	SLC22A3	6	160348268	160452581	+	3348	protein_coding	solute carrier family 22 member 3 [Source:HGNC Symbol;Acc:HGNC:10967]	-	2	26	0.0353023	0.391399
ENSG00000173727	-1.76275	3.39345	0.000276516	0.122461	AP000769.1	11	65455258	65466720	+	1772	transcribed_unprocessed_pseudogene	Finkel-Biskis-Reilly murine sarcoma virus (FBR-MuSV) ubiquitously expressed (FAU) pseudogene	-	44	175	1.4674	4.97744
ENSG00000214189	-1.79808	3.47757	0.000287381	0.122461	ZNF788P	19	12092263	12137235	+	5692	transcribed_unprocessed_pseudogene	zinc finger family member 788, pseudogene [Source:HGNC Symbol;Acc:HGNC:33112]	-	39	159	0.40491	1.40787
ENSG00000234997	-2.74562	6.70678	0.000300744	0.122461	AC016745.1	2	113424495	113425324	+	508	antisense	novel transcript	-	5	40	0.581654	3.96851
ENSG00000145700	-6.90335	119.706	0.000315208	0.122461	ANKRD31	5	75068275	75236878	-	6273	protein_coding	ankyrin repeat domain 31 [Source:HGNC Symbol;Acc:HGNC:26853]	-	0	16	0	0.128551
ENSG00000273218	-6.90335	119.706	0.000315208	0.122461	AC005776.2	19	15346068	15348417	-	1769	lincRNA	novel transcript	-	0	16	0	0.455852
ENSG00000200693	6.9368	122.514	0.000315208	0.122461	RF00012	14	63651296	63651499	-	204	snoRNA		-	14	0	4.05561	0
ENSG00000161281	-6.90335	119.706	0.000315208	0.122461	COX7A1	19	36150922	36152869	-	1006	protein_coding	cytochrome c oxidase subunit 7A1 [Source:HGNC Symbol;Acc:HGNC:2287]	-	0	16	0	0.801592
ENSG00000186714	6.9368	122.514	0.000315208	0.122461	CCDC73	11	32602246	32794658	-	7875	protein_coding	coiled-coil domain containing 73 [Source:HGNC Symbol;Acc:HGNC:23261]	-	14	0	0.10506	0
ENSG00000268412	-6.90335	119.706	0.000315208	0.122461	TRMT112P6	2	26028208	26028612	-	372	processed_pseudogene	tRNA methyltransferase subunit 11-2 pseudogene 6 [Source:HGNC Symbol;Acc:HGNC:44025]	-	0	16	0	2.16775
ENSG00000225914	-6.90335	119.706	0.000315208	0.122461	HCG23	6	32254640	32407763	+	8816	antisense	HLA complex group 23 [Source:NCBI gene;Acc:414764]	-	0	16	0	0.0914703
ENSG00000276176	6.9368	122.514	0.000315208	0.122461	MIR6090	11	128522390	128522449	+	60	miRNA	microRNA 6090 [Source:HGNC Symbol;Acc:HGNC:50204]	-	14	0	13.7891	0
ENSG00000241313	2.4162	5.33763	0.000315485	0.122461	WWTR1-AS1	3	149657020	149661364	+	2603	antisense	WWTR1 antisense RNA 1 [Source:HGNC Symbol;Acc:HGNC:41035]	-	37	8	0.840013	0.154899
ENSG00000234810	-1.96909	3.91522	0.00031691	0.122461	AL603840.1	1	55329288	56070513	+	6257	lincRNA	novel transcript	-	20	92	0.188896	0.74106
ENSG00000276256	-2.47051	5.5424	0.000325735	0.122461	AC011043.1	GL000195.1	42939	49164	-	2195	protein_coding	Homo sapiens uncharacterized LOC389831 (LOC389831), transcript variant 3, mRNA. [Source:RefSeq mRNA;Acc:NM_001347681]	-	7	46	0.188461	1.05622
ENSG00000157502	-2.47051	5.5424	0.000325735	0.122461	MUM1L1	X	106168305	106208956	+	4343	protein_coding	MUM1 like 1 [Source:HGNC Symbol;Acc:HGNC:26583]	-	7	46	0.0952504	0.533826
ENSG00000256771	-1.7707	3.41219	0.000333918	0.123544	ZNF253	19	19865886	19894674	+	3626	protein_coding	zinc finger protein 253 [Source:HGNC Symbol;Acc:HGNC:13497]	zf-C2H2	40	160	0.651915	2.22394
ENSG00000272374	-3.34444	10.1573	0.000348534	0.126937	Z97832.2	6	35220370	35224630	-	4261	lincRNA	novel transcript, antisense to SCUBE3	-	2	25	0.0277381	0.295706
ENSG00000235706	-1.83678	3.57212	0.00037376	0.132999	DICER1-AS1	14	95157645	95179933	+	3722	antisense	DICER1 antisense RNA 1 [Source:HGNC Symbol;Acc:HGNC:43017]	-	26	109	0.412815	1.47598
ENSG00000166432	-3.94793	15.4328	0.000376589	0.132999	ZMAT1	X	101882288	101932031	-	7514	protein_coding	zinc finger matrin-type 1 [Source:HGNC Symbol;Acc:HGNC:29377]	-	1	20	0.0078648	0.13415
ENSG00000273472	2.48384	5.59384	0.000391938	0.136353	AC096733.2	4	140756528	140757921	+	1394	lincRNA	novel transcript	-	34	7	1.44137	0.253085
ENSG00000235703	-1.89365	3.71575	0.000398446	0.136579	LINC00894	X	149938628	150224580	+	6323	antisense	long intergenic non-protein coding RNA 894 [Source:HGNC Symbol;Acc:HGNC:48579]	-	22	96	0.205617	0.765208
ENSG00000188243	-1.52234	2.87256	0.000418669	0.139596	COMMD6	13	75525219	75549439	-	2897	protein_coding	COMM domain containing 6 [Source:HGNC Symbol;Acc:HGNC:24015]	-	260	874	5.30376	15.2053
ENSG00000273783	-2.94859	7.71992	0.000419448	0.139596	AL136040.1	14	81221218	81222460	+	1130	antisense	uncharacterized LOC101928504 [Source:NCBI gene;Acc:101928504]	-	3	28	0.156892	1.24885
ENSG00000170989	1.94816	3.85881	0.000453206	0.139596	S1PR1	1	101236865	101243713	+	5223	protein_coding	sphingosine-1-phosphate receptor 1 [Source:HGNC Symbol;Acc:HGNC:3165]	-	63	19	0.712819	0.183343
ENSG00000231822	2.52177	5.74288	0.000495363	0.139596	AC019097.1	2	99102018	99102752	+	735	processed_pseudogene	structural maintenance of chromosomes 3 (SMC3) pseudogene	-	30	6	2.41208	0.411429
ENSG00000212722	-2.19366	4.57466	0.000506343	0.139596	KRTAP4-9	17	41105332	41106488	+	1157	protein_coding	keratin associated protein 4-9 [Source:HGNC Symbol;Acc:HGNC:18910]	-	10	54	0.51077	2.3523
ENSG00000165568	-3.28587	9.75318	0.000506526	0.139596	AKR1E2	10	4786629	4848062	+	2417	protein_coding	aldo-keto reductase family 1 member E2 [Source:HGNC Symbol;Acc:HGNC:23437]	-	2	24	0.0489003	0.500456
ENSG00000162148	-3.28587	9.75318	0.000506526	0.139596	PPP1R32	11	61481120	61490931	+	2400	protein_coding	protein phosphatase 1 regulatory subunit 32 [Source:HGNC Symbol;Acc:HGNC:28869]	-	2	24	0.0492467	0.504001
ENSG00000273007	-3.22482	9.34907	0.000506526	0.139596	AC021205.3	4	122881878	122884712	-	1709	antisense	novel transcript, antisense to FGF2	-	2	23	0.0691587	0.678293
ENSG00000242085	-3.22482	9.34907	0.000506526	0.139596	RPS20P33	14	105374618	105374971	+	354	processed_pseudogene	ribosomal protein S20 pseudogene 33 [Source:HGNC Symbol;Acc:HGNC:36725]	-	2	23	0.333876	3.27458
ENSG00000053702	-2.2331	4.70142	0.000513333	0.139596	NRIP2	12	2825348	2835544	-	2803	protein_coding	nuclear receptor interacting protein 2 [Source:HGNC Symbol;Acc:HGNC:23078]	-	9	50	0.189748	0.899039
ENSG00000239739	-2.26159	4.7952	0.000513333	0.139596	AC026316.2	3	170740351	170741365	-	263	lincRNA	novel transcript	-	9	51	2.0223	9.77341
ENSG00000227543	6.83079	113.834	0.000517265	0.139596	SPAG5-AS1	17	28598790	28617377	+	3835	processed_transcript	SPAG5 antisense RNA 1 [Source:HGNC Symbol;Acc:HGNC:41140]	-	13	0	0.200326	0
ENSG00000271079	-6.81105	112.287	0.000517265	0.139596	CTAGE15	7	143571801	143574387	+	2587	protein_coding	CTAGE family member 15 [Source:HGNC Symbol;Acc:HGNC:37295]	-	0	15	0	0.292231
ENSG00000259070	6.83079	113.834	0.000517265	0.139596	LINC00639	14	38749339	38948273	-	4860	lincRNA	long intergenic non-protein coding RNA 639 [Source:HGNC Symbol;Acc:HGNC:27502]	-	13	0	0.158076	0
ENSG00000215217	6.83079	113.834	0.000517265	0.139596	C5orf49	5	7830378	7851490	-	2385	protein_coding	chromosome 5 open reading frame 49 [Source:HGNC Symbol;Acc:HGNC:27028]	-	13	0	0.322117	0
ENSG00000249494	-6.81105	112.287	0.000517265	0.139596	AC008629.1	5	119006347	119070890	-	1335	antisense	uncharacterized LOC105379143 [Source:NCBI gene;Acc:105379143]	-	0	15	0	0.566293
ENSG00000254852	-6.81105	112.287	0.000517265	0.139596	NPIPA2	16	14748066	14765413	+	1428	protein_coding	nuclear pore complex interacting protein family member A2 [Source:HGNC Symbol;Acc:HGNC:41979]	-	0	15	0	0.529413
ENSG00000271754	-6.81105	112.287	0.000517265	0.139596	AL355802.2	6	43519180	43519724	-	545	antisense	novel transcript, antisense to POLR1C	-	0	15	0	1.38716
ENSG00000283294	-2.40657	5.30213	0.000521035	0.139596	AP005212.4	18	14225224	14342505	+	3505	processed_transcript	novel transcript	-	7	44	0.118024	0.632698
ENSG00000104043	-3.87444	14.6664	0.000575412	0.1507	ATP8B4	15	49858238	50182817	-	10861	protein_coding	ATPase phospholipid transporting 8B4 (putative) [Source:HGNC Symbol;Acc:HGNC:13536]	-	1	19	0.00544113	0.0881689
ENSG00000110786	-3.87444	14.6664	0.000575412	0.1507	PTPN5	11	18727928	18792721	-	5497	protein_coding	protein tyrosine phosphatase, non-receptor type 5 [Source:HGNC Symbol;Acc:HGNC:9657]	-	1	19	0.0107506	0.174204
ENSG00000270084	-2.89637	7.44553	0.000589	0.152544	GAS5-AS1	1	173863248	173863941	+	694	antisense	GAS5 antisense RNA 1 [Source:HGNC Symbol;Acc:HGNC:44119]	-	3	27	0.255459	1.96081
ENSG00000137691	-1.87194	3.66025	0.000614658	0.15744	CFAP300	11	102047443	102084560	+	2647	protein_coding	cilia and flagella associated protein 300 [Source:HGNC Symbol;Acc:HGNC:28188]	-	20	86	0.446514	1.63748
ENSG00000135436	-2.48801	5.61004	0.000668181	0.167469	FAM186B	12	49582885	49605639	-	4756	protein_coding	family with sequence similarity 186 member B [Source:HGNC Symbol;Acc:HGNC:25296]	-	6	40	0.0745535	0.423887
ENSG00000138435	-2.48801	5.61004	0.000668181	0.167469	CHRNA1	2	174747592	174787935	-	4855	protein_coding	cholinergic receptor nicotinic alpha 1 subunit [Source:HGNC Symbol;Acc:HGNC:1955]	-	6	40	0.0730332	0.415243
ENSG00000115602	-1.44652	2.72549	0.000780082	0.180923	IL1RL1	2	102311502	102352037	+	5746	protein_coding	interleukin 1 receptor like 1 [Source:HGNC Symbol;Acc:HGNC:5998]	-	264	842	2.71517	7.38547
ENSG00000138944	1.63068	3.09659	0.000783401	0.180923	SHISAL1	22	44243667	44312851	-	6751	protein_coding	shisa like 1 [Source:HGNC Symbol;Acc:HGNC:29335]	-	122	46	1.06795	0.343417
ENSG00000085117	1.91189	3.76301	0.000784949	0.180923	CD82	11	44564427	44620363	+	4054	protein_coding	CD82 molecule [Source:HGNC Symbol;Acc:HGNC:6210]	-	55	17	0.801747	0.211347
ENSG00000272551	-2.24917	4.7541	0.000812684	0.180923	AC017048.3	2	176611437	176612249	-	813	lincRNA	novel transcript	-	8	45	0.581511	2.78967
ENSG00000225877	-2.8422	7.17114	0.000829981	0.180923	PSG8-AS1	19	42821863	42826878	+	1873	lincRNA	PSG8 antisense RNA 1 [Source:HGNC Symbol;Acc:HGNC:52550]	-	3	26	0.0946547	0.699628
ENSG00000128394	2.20953	4.62525	0.00083827	0.180923	APOBEC3F	22	39040604	39053910	+	3242	protein_coding	apolipoprotein B mRNA editing enzyme catalytic subunit 3F [Source:HGNC Symbol;Acc:HGNC:17356]	-	36	9	0.656218	0.139914
ENSG00000262227	-6.71243	104.868	0.00085757	0.180923	AC004771.3	17	4987706	4988446	+	551	antisense	novel transcript, antisense to INCA1	-	0	14	0	1.28058
ENSG00000004468	-6.71243	104.868	0.00085757	0.180923	CD38	4	15778275	15853230	+	6855	protein_coding	CD38 molecule [Source:HGNC Symbol;Acc:HGNC:1667]	-	0	14	0	0.102932
ENSG00000248927	6.71637	105.154	0.00085757	0.180923	AC114284.1	5	120781218	120790778	+	1114	lincRNA	novel transcript	-	12	0	0.636582	0
ENSG00000265205	6.71637	105.154	0.00085757	0.180923	AC010761.3	17	28670054	28672804	-	499	antisense	novel transcript, antisense to SUPT6H	-	12	0	1.42115	0
ENSG00000227256	-6.71243	104.868	0.00085757	0.180923	MIS18A-AS1	21	32277863	32280988	+	769	antisense	MIS18A antisense RNA 1 [Source:HGNC Symbol;Acc:HGNC:40106]	-	0	14	0	0.917557
ENSG00000230310	-6.71243	104.868	0.00085757	0.180923	AC010422.1	19	12552597	12553644	+	543	lincRNA	novel transcript	-	0	14	0	1.29945
ENSG00000269937	6.71637	105.154	0.00085757	0.180923	AC093525.7	16	2561471	2565096	-	3626	antisense	novel transcript, antisense to PDPK1	-	12	0	0.195574	0
ENSG00000199331	-6.71243	104.868	0.00085757	0.180923	RF00019	9	109042386	109042487	-	102	misc_RNA		-	0	14	0	6.91766
ENSG00000105989	-6.71243	104.868	0.00085757	0.180923	WNT2	7	117275451	117323289	-	4497	protein_coding	Wnt family member 2 [Source:HGNC Symbol;Acc:HGNC:12780]	-	0	14	0	0.156905
ENSG00000064489	6.71637	105.154	0.00085757	0.180923	BORCS8-MEF2B	19	19145567	19192158	-	1931	protein_coding	BORCS8-MEF2B readthrough [Source:HGNC Symbol;Acc:HGNC:39979]	SRF	12	0	0.367246	0
ENSG00000274791	2.51655	5.72213	0.000872039	0.180923	F8A2	X	155382115	155383230	+	1116	protein_coding	coagulation factor VIII associated 2 [Source:HGNC Symbol;Acc:HGNC:31849]	-	25	5	1.32384	0.225807
ENSG00000170166	-2.55367	5.87125	0.000877744	0.180923	HOXD4	2	176151222	176153226	+	1464	protein_coding	homeobox D4 [Source:HGNC Symbol;Acc:HGNC:5138]	Homeobox	5	35	0.201831	1.20492
ENSG00000188672	-3.797	13.8999	0.000884859	0.180923	RHCE	1	25362249	25430192	-	2433	protein_coding	Rh blood group CcEe antigens [Source:HGNC Symbol;Acc:HGNC:10008]	-	1	18	0.0242894	0.372874
ENSG00000255150	4.0543	16.6136	0.000884859	0.180923	EID3	12	104303739	104305205	+	1467	protein_coding	EP300 interacting inhibitor of differentiation 3 [Source:HGNC Symbol;Acc:HGNC:32961]	-	16	1	0.644538	0.0343559
ENSG00000258878	-3.797	13.8999	0.000884859	0.180923	AL355076.3	14	65234515	65235101	-	587	processed_pseudogene	transmembrane protein 149 (TMEM149) pseudogene	-	1	18	0.100675	1.54549
ENSG00000250222	-2.14408	4.4201	0.000974164	0.19745	AC008443.4	5	181191924	181194429	+	486	antisense	novel transcript	-	9	47	1.09437	4.87408
ENSG00000181444	1.54123	2.91043	0.00110619	0.217629	ZNF467	7	149764182	149773479	-	2734	protein_coding	zinc finger protein 467 [Source:HGNC Symbol;Acc:HGNC:23154]	zf-C2H2	147	59	3.17744	1.08764
ENSG00000272167	-1.5831	2.99614	0.00111059	0.217629	AL606537.1	1	214028891	214030901	-	2011	antisense	PROX1 antisense RNA 1	-	45	158	1.32239	3.95983
ENSG00000230454	-2.41427	5.33048	0.00111107	0.217629	U73166.1	3	50260303	50263358	+	2625	lincRNA	novel transcript	-	6	38	0.135077	0.729602
ENSG00000251226	2.25168	4.76238	0.00111107	0.217629	AP001999.1	11	134735596	134763810	+	3684	lincRNA	novel transcript	-	33	8	0.529362	0.109446
ENSG00000171827	-2.51201	5.70414	0.00115274	0.220609	ZNF570	19	37467585	37488652	+	6246	protein_coding	zinc finger protein 570 [Source:HGNC Symbol;Acc:HGNC:26416]	zf-C2H2	5	34	0.0473071	0.274352
ENSG00000137571	1.95375	3.87379	0.00116955	0.220609	SLCO5A1	8	69667047	69835064	-	9992	protein_coding	solute carrier organic anion transporter family member 5A1 [Source:HGNC Symbol;Acc:HGNC:19046]	-	50	15	0.295717	0.0756607
ENSG00000229388	-2.78592	6.89675	0.0011736	0.220609	LINC01715	1	28643228	28648581	+	978	lincRNA	long intergenic non-protein coding RNA 1715 [Source:HGNC Symbol;Acc:HGNC:52502]	-	3	25	0.181276	1.28835
ENSG00000280211	-2.78592	6.89675	0.0011736	0.220609	AC106886.4	16	30773532	30776033	-	2502	TEC	novel transcript, antisense to RNF40	-	3	25	0.0708586	0.503598
ENSG00000232907	-2.78592	6.89675	0.0011736	0.220609	DLGAP4-AS1	20	36507702	36573391	-	2437	antisense	DLGAP4 antisense RNA 1 [Source:HGNC Symbol;Acc:HGNC:51223]	-	3	25	0.0727485	0.51703
ENSG00000214243	2.45793	5.49429	0.00119746	0.222492	AC004980.2	7	76650401	76650897	-	497	processed_pseudogene	pseudogene similar to part of RB-associated KRAB zinc finger RBAK	-	24	5	2.85373	0.507043
ENSG00000225205	-1.62539	3.08525	0.00120271	0.222492	AC078883.1	2	172480840	172556596	-	2447	antisense	novel transcript	-	34	123	0.821114	2.53339
ENSG00000258701	-2.00334	4.00928	0.00131742	0.237555	LINC00638	14	104821201	104823718	+	2518	lincRNA	long intergenic non-protein coding RNA 638 [Source:HGNC Symbol;Acc:HGNC:28325]	-	11	52	0.258164	1.04083
ENSG00000228933	-2.26951	4.82159	0.00135615	0.237555	AC107419.1	X	27174920	27398997	-	2820	lincRNA	novel transcript	-	7	40	0.146692	0.714895
ENSG00000017483	3.96187	15.5827	0.00136958	0.237555	SLC38A5	X	48458537	48470256	-	4014	protein_coding	solute carrier family 38 member 5 [Source:HGNC Symbol;Acc:HGNC:18070]	-	15	1	0.220837	0.0125561
ENSG00000254815	-1.90304	3.74001	0.00137481	0.237555	AP006284.1	11	557595	560107	+	2418	antisense	novel transcript	-	15	66	0.366601	1.37569
ENSG00000254614	1.51387	2.85575	0.00137579	0.237555	AP003068.2	11	65177606	65181834	-	1791	antisense	uncharacterized LOC728975 [Source:NCBI gene;Acc:728975]	-	154	63	5.0814	1.77287
ENSG00000197408	6.59208	96.4749	0.00143701	0.237555	CYP2B6	19	40991250	41018398	+	3765	protein_coding	cytochrome P450 family 2 subfamily B member 6 [Source:HGNC Symbol;Acc:HGNC:2615]	-	11	0	0.172658	0
ENSG00000244945	6.59208	96.4749	0.00143701	0.237555	AC136604.2	5	179595904	179603741	-	1966	antisense	uncharacterized LOC101928445 [Source:NCBI gene;Acc:101928445]	-	11	0	0.330649	0
ENSG00000279283	6.59208	96.4749	0.00143701	0.237555	AC131009.4	12	131896500	131898239	+	1740	TEC	novel transcript	-	11	0	0.373596	0
ENSG00000251503	6.59208	96.4749	0.00143701	0.237555	CENPS-CORT	1	10430102	10452153	+	2244	protein_coding	CENPS-CORT readthrough [Source:HGNC Symbol;Acc:HGNC:38843]	-	11	0	0.289687	0
ENSG00000197153	-6.60657	97.4488	0.00143701	0.237555	HIST1H3J	6	27890382	27893106	-	775	protein_coding	histone cluster 1 H3 family member j [Source:HGNC Symbol;Acc:HGNC:4774]	-	0	13	0	0.845421
ENSG00000174059	-6.60657	97.4488	0.00143701	0.237555	CD34	1	207880972	207911402	-	9219	protein_coding	CD34 molecule [Source:HGNC Symbol;Acc:HGNC:1662]	-	0	13	0	0.0710708
ENSG00000228019	-6.60657	97.4488	0.00143701	0.237555	AC006480.1	7	67307605	67308356	-	378	unprocessed_pseudogene	ribosomal protein L29 (RPL29) pseudogene	-	0	13	0	1.73334
ENSG00000274128	-6.60657	97.4488	0.00143701	0.237555	AC027807.2	15	83962176	83962583	+	408	sense_intronic	novel transcript, sense intronic to ADAMTSL3	-	0	13	0	1.60589
ENSG00000231868	-6.60657	97.4488	0.00143701	0.237555	AL031848.1	1	6443034	6447006	-	351	antisense	novel transcript, antisense to ESPN	-	0	13	0	1.86667
ENSG00000273196	-6.60657	97.4488	0.00143701	0.237555	AC062037.2	2	85387074	85387146	-	73	antisense	novel transcript, antisense to ELMOD3	-	0	13	0	8.97536
ENSG00000276966	-1.93337	3.81946	0.00149604	0.243803	HIST1H4E	6	26204552	26206038	+	1487	protein_coding	histone cluster 1 H4 family member e [Source:HGNC Symbol;Acc:HGNC:4790]	-	12	54	0.476902	1.83027
ENSG00000165923	-1.93337	3.81946	0.00149604	0.243803	AGBL2	11	47659591	47715389	-	5483	protein_coding	ATP/GTP binding protein like 2 [Source:HGNC Symbol;Acc:HGNC:26296]	-	12	54	0.129337	0.496372
ENSG00000137033	-1.37956	2.6019	0.00151522	0.243803	IL33	9	6215786	6257983	+	3253	protein_coding	interleukin 33 [Source:HGNC Symbol;Acc:HGNC:16028]	-	200	609	3.63333	9.4355
ENSG00000261150	-2.46911	5.53704	0.00151665	0.243803	EPPK1	8	143857324	143878464	-	16002	protein_coding	epiplakin 1 [Source:HGNC Symbol;Acc:HGNC:15577]	-	5	33	0.0184652	0.103937
ENSG00000131771	-3.02445	8.13673	0.00159793	0.244401	PPP1R1B	17	39626740	39636626	+	4554	protein_coding	protein phosphatase 1 regulatory inhibitor subunit 1B [Source:HGNC Symbol;Acc:HGNC:9287]	-	2	20	0.0259535	0.221344
ENSG00000224786	-3.02445	8.13673	0.00159793	0.244401	CETN4P	4	122728532	122732482	-	3858	transcribed_unitary_pseudogene	centrin 4, pseudogene [Source:HGNC Symbol;Acc:HGNC:35450]	-	2	20	0.0306356	0.261276
ENSG00000232926	-3.02445	8.13673	0.00159793	0.244401	AC000078.1	22	19887289	19887970	+	682	processed_pseudogene	ribosomal protein L8 (RPL8) pseudogene	-	2	20	0.173302	1.47801
ENSG00000277957	3.3114	9.92732	0.00159793	0.244401	SENP3-EIF4A1	17	7563287	7578715	+	3519	protein_coding	SENP3-EIF4A1 readthrough (NMD candidate) [Source:HGNC Symbol;Acc:HGNC:49182]	-	18	2	0.302282	0.0286446
ENSG00000047936	-3.02445	8.13673	0.00159793	0.244401	ROS1	6	117288300	117425855	-	7856	protein_coding	ROS proto-oncogene 1, receptor tyrosine kinase [Source:HGNC Symbol;Acc:HGNC:10261]	-	2	20	0.0150448	0.12831
ENSG00000232838	1.55201	2.93226	0.00159798	0.244401	PET117	20	18137873	18143169	+	1141	protein_coding	PET117 homolog [Source:HGNC Symbol;Acc:HGNC:40045]	-	108	43	5.59367	1.89939
ENSG00000115841	-1.55625	2.94087	0.00160295	0.244401	RMDN2	2	37923187	38067142	+	5999	protein_coding	regulator of microtubule dynamics 2 [Source:HGNC Symbol;Acc:HGNC:26567]	-	38	131	0.374338	1.10059
ENSG00000182632	-1.9754	3.93238	0.00160424	0.244401	CCNYL2	10	42408168	42475349	-	3831	transcribed_unprocessed_pseudogene	cyclin Y-like 2 (pseudogene) [Source:HGNC Symbol;Acc:HGNC:23495]	-	11	51	0.169683	0.670949
ENSG00000150773	-1.65968	3.15946	0.00162094	0.245341	PIH1D2	11	112064010	112074274	-	2474	protein_coding	PIH1 domain containing 2 [Source:HGNC Symbol;Acc:HGNC:25210]	-	24	89	0.573284	1.8131
ENSG00000231776	2.39683	5.26646	0.0016487	0.247932	LINC01611	6	84421028	84556152	-	741	lincRNA	long intergenic non-protein coding RNA 1611 [Source:HGNC Symbol;Acc:HGNC:51791]	-	23	5	1.83429	0.340082
ENSG00000245848	2.97821	7.88008	0.00166513	0.248363	CEBPA	19	33299934	33302564	-	2631	protein_coding	CCAAT enhancer binding protein alpha [Source:HGNC Symbol;Acc:HGNC:1833]	C/EBP	21	3	0.47169	0.0574688
ENSG00000130052	1.48748	2.80398	0.00167287	0.248363	STARD8	X	68647666	68725842	+	5558	protein_coding	StAR related lipid transfer domain containing 8 [Source:HGNC Symbol;Acc:HGNC:19161]	-	156	65	1.65869	0.589422
ENSG00000141469	-1.35153	2.55183	0.00175821	0.259381	SLC14A1	18	45687025	45752520	+	7182	protein_coding	solute carrier family 14 member 1 (Kidd blood group) [Source:HGNC Symbol;Acc:HGNC:10918]	-	219	654	1.80201	4.58948
ENSG00000250590	-2.29606	4.91114	0.00185899	0.27188	LINC02492	4	187532878	187672641	-	1266	lincRNA	long intergenic non-protein coding RNA 2492 [Source:HGNC Symbol;Acc:HGNC:53476]	-	6	35	0.280076	1.39337
ENSG00000158806	-2.0492	4.13877	0.00186626	0.27188	NPM2	8	22024125	22036897	+	2063	protein_coding	nucleophosmin/nucleoplasmin 2 [Source:HGNC Symbol;Acc:HGNC:7930]	-	9	44	0.257811	1.07494
ENSG00000133433	-1.6045	3.0409	0.00193324	0.279585	GSTT2B	22	23957414	23961186	-	1099	protein_coding	glutathione S-transferase theta 2B (gene/pseudogene) [Source:HGNC Symbol;Acc:HGNC:33437]	-	30	107	1.61318	4.90702
ENSG00000158008	-2.4249	5.36993	0.00199893	0.279585	EXTL1	1	26019884	26036464	+	4537	protein_coding	exostosin like glycosyltransferase 1 [Source:HGNC Symbol;Acc:HGNC:3515]	-	5	32	0.0651268	0.355478
ENSG00000189120	1.39985	2.63874	0.00200727	0.279585	SP6	17	47844908	47855874	-	4075	protein_coding	Sp6 transcription factor [Source:HGNC Symbol;Acc:HGNC:14530]	zf-C2H2	228	101	3.30648	1.24918
ENSG00000240567	-2.11529	4.33278	0.00202491	0.279585	LINC02067	3	161426427	161448242	+	2845	lincRNA	long intergenic non-protein coding RNA 2067 [Source:HGNC Symbol;Acc:HGNC:52913]	-	8	41	0.166175	0.726328
ENSG00000169894	-1.45625	2.74394	0.00208425	0.279585	MUC3A	7	100949555	100968346	+	11374	protein_coding	mucin 3A, cell surface associated [Source:HGNC Symbol;Acc:HGNC:7513]	-	56	180	0.29096	0.79761
ENSG00000108691	-3.62842	12.3669	0.00213372	0.279585	CCL2	17	34255218	34257203	+	1986	protein_coding	C-C motif chemokine ligand 2 [Source:HGNC Symbol;Acc:HGNC:10618]	-	1	16	0.0297563	0.406043
ENSG00000172403	-3.62842	12.3669	0.00213372	0.279585	SYNPO2	4	118850688	119061247	+	14034	protein_coding	synaptopodin 2 [Source:HGNC Symbol;Acc:HGNC:17732]	-	1	16	0.00421092	0.0574606
ENSG00000230699	3.86312	14.5518	0.00213372	0.279585	AL645608.2	1	911435	914948	+	3043	lincRNA	novel transcript	-	14	1	0.271885	0.0165626
ENSG00000132554	-3.62842	12.3669	0.00213372	0.279585	RGS22	8	99960936	100131268	-	6363	protein_coding	regulator of G protein signaling 22 [Source:HGNC Symbol;Acc:HGNC:24499]	-	1	16	0.00928745	0.126733
ENSG00000228492	-2.59734	6.05169	0.00214237	0.279585	RAB11FIP1P1	X	74202834	74204595	+	1762	processed_pseudogene	RAB11 family interacting protein 1 pseudogene 1 [Source:HGNC Symbol;Acc:HGNC:42366]	-	4	29	0.134157	0.829514
ENSG00000163746	-2.59734	6.05169	0.00214237	0.279585	PLSCR2	3	146391421	146495991	-	2557	protein_coding	phospholipid scramblase 2 [Source:HGNC Symbol;Acc:HGNC:16494]	-	4	29	0.0924459	0.571609
ENSG00000278922	1.63064	3.0965	0.00219009	0.279585	AC002310.6	16	30526918	30528294	+	1377	TEC	novel transcript	-	77	29	3.30457	1.06144
ENSG00000183850	-1.60106	3.03366	0.00219009	0.279585	ZNF730	19	23075210	23147219	+	3291	protein_coding	zinc finger protein 730 [Source:HGNC Symbol;Acc:HGNC:32470]	zf-C2H2	25	89	0.448922	1.36299
ENSG00000267500	-1.79075	3.45995	0.00221541	0.279585	ZNF887P	19	11648364	11652877	+	1407	transcribed_unprocessed_pseudogene	zinc finger protein 887, pseudogene [Source:HGNC Symbol;Acc:HGNC:38700]	-	14	57	0.588021	2.0418
ENSG00000079101	-2.95096	7.73262	0.00236482	0.279585	CLUL1	18	596988	650334	+	3846	protein_coding	clusterin like 1 [Source:HGNC Symbol;Acc:HGNC:2096]	-	2	19	0.0307312	0.248987
ENSG00000273173	-2.95096	7.73262	0.00236482	0.279585	SNURF	15	24954986	24977850	+	1175	protein_coding	SNRPN upstream reading frame [Source:HGNC Symbol;Acc:HGNC:11171]	-	2	19	0.100589	0.814981
ENSG00000230499	3.22948	9.37931	0.00236482	0.279585	AC108463.2	2	111195963	111206494	+	412	lincRNA	novel transcript	-	17	2	2.43843	0.244661
ENSG00000272563	-2.95096	7.73262	0.00236482	0.279585	AC016745.2	2	113432600	113436042	+	3443	lincRNA	novel transcript	-	2	19	0.0343282	0.27813
ENSG00000258393	-2.95096	7.73262	0.00236482	0.279585	AL049833.1	14	97116355	97121501	+	840	lincRNA	novel transcript	-	2	19	0.140705	1.14
ENSG00000105556	-2.60255	6.07358	0.00237037	0.279585	MIER2	19	301444	344815	-	7939	protein_coding	MIER family member 2 [Source:HGNC Symbol;Acc:HGNC:29210]	-	3	22	0.0223313	0.139665
ENSG00000121101	-2.66629	6.34797	0.00237037	0.279585	TEX14	17	58556678	58692055	-	5325	protein_coding	testis expressed 14, intercellular bridge forming factor [Source:HGNC Symbol;Acc:HGNC:11737]	-	3	23	0.0332936	0.217691
ENSG00000256546	-1.88818	3.70167	0.00238425	0.279585	AC156455.1	12	122063306	122068616	+	1831	processed_transcript	uncharacterized LOC100506691 [Source:NCBI gene;Acc:100506691]	-	11	48	0.355028	1.32125
ENSG00000137474	-1.81895	3.52824	0.00241222	0.279585	MYO7A	11	77128264	77215241	+	10147	protein_coding	myosin VIIA [Source:HGNC Symbol;Acc:HGNC:7606]	-	13	54	0.0757119	0.268218
ENSG00000181634	6.45607	87.7954	0.00243493	0.279585	TNFSF15	9	114784635	114806126	-	7889	protein_coding	TNF superfamily member 15 [Source:HGNC Symbol;Acc:HGNC:11931]	-	10	0	0.0749095	0
ENSG00000172817	6.45607	87.7954	0.00243493	0.279585	CYP7B1	8	64587763	64798761	-	2282	protein_coding	cytochrome P450 family 7 subfamily B member 1 [Source:HGNC Symbol;Acc:HGNC:2652]	-	10	0	0.258966	0
ENSG00000153563	-6.49233	90.0297	0.00243493	0.279585	CD8A	2	86784610	86808396	-	3634	protein_coding	CD8a molecule [Source:HGNC Symbol;Acc:HGNC:1706]	-	0	12	0	0.166429
ENSG00000232352	6.45607	87.7954	0.00243493	0.279585	SEMA3B-AS1	3	50266641	50267371	-	338	antisense	SEMA3B antisense RNA 1 (head to head) [Source:HGNC Symbol;Acc:HGNC:49096]	-	10	0	1.7484	0
ENSG00000281005	6.45607	87.7954	0.00243493	0.279585	LINC00921	16	3263743	3267567	+	2468	lincRNA	long intergenic non-protein coding RNA 921 [Source:HGNC Symbol;Acc:HGNC:26830]	-	10	0	0.239449	0
ENSG00000279198	6.45607	87.7954	0.00243493	0.279585	AC008894.3	19	16074293	16077395	-	3103	TEC	TEC	-	10	0	0.190448	0
ENSG00000279799	6.45607	87.7954	0.00243493	0.279585	AC006077.2	5	134905235	134905691	+	457	TEC	TEC	-	10	0	1.29313	0
ENSG00000175003	6.45607	87.7954	0.00243493	0.279585	SLC22A1	6	160121789	160158718	+	2312	protein_coding	solute carrier family 22 member 1 [Source:HGNC Symbol;Acc:HGNC:10963]	-	10	0	0.255606	0
ENSG00000130489	6.45607	87.7954	0.00243493	0.279585	SCO2	22	50523568	50525606	-	1022	protein_coding	SCO2, cytochrome c oxidase assembly protein [Source:HGNC Symbol;Acc:HGNC:10604]	-	10	0	0.578239	0
ENSG00000237595	-6.49233	90.0297	0.00243493	0.279585	AL161937.2	20	50162765	50166102	-	1064	lincRNA	novel transcript	-	0	12	0	0.568422
ENSG00000230863	-6.49233	90.0297	0.00243493	0.279585	AL137803.1	1	75641178	75724049	-	2159	transcribed_processed_pseudogene	histidine acid phosphatase domain containing 1 (HISPPD1) pseudogene	-	0	12	0	0.28013
ENSG00000228172	6.45607	87.7954	0.00243493	0.279585	AL020996.1	1	25816749	25820797	-	2793	antisense	novel transcript	-	10	0	0.211586	0
ENSG00000271267	-6.49233	90.0297	0.00243493	0.279585	AL353807.4	1	155566050	155566306	-	257	processed_pseudogene	ATP synthase, H+ transporting, mitochondrial Fo complex, subunit F2 (ATP5J2) pseudogene	-	0	12	0	2.35331
ENSG00000267394	6.45607	87.7954	0.00243493	0.279585	AC004596.1	17	44198882	44216565	+	528	antisense	novel transcript, antisense to ATXN7L3	-	10	0	1.11924	0
ENSG00000225808	6.45607	87.7954	0.00243493	0.279585	DNAJC19P5	2	177229191	177229506	-	316	processed_pseudogene	DnaJ heat shock protein family (Hsp40) member C19 pseudogene 5 [Source:HGNC Symbol;Acc:HGNC:45068]	-	10	0	1.87013	0
ENSG00000258608	-6.49233	90.0297	0.00243493	0.279585	DNAJC19P9	14	45290036	45290386	+	351	processed_pseudogene	DnaJ heat shock protein family (Hsp40) member C19 pseudogene 9 [Source:HGNC Symbol;Acc:HGNC:45072]	-	0	12	0	1.72308
ENSG00000239917	-6.49233	90.0297	0.00243493	0.279585	RPS10P16	8	117523271	117524061	-	496	unprocessed_pseudogene	ribosomal protein S10 pseudogene 16 [Source:HGNC Symbol;Acc:HGNC:36200]	-	0	12	0	1.21936
ENSG00000100433	6.45607	87.7954	0.00243493	0.279585	KCNK10	14	88180103	88326907	-	8258	protein_coding	potassium two pore domain channel subfamily K member 10 [Source:HGNC Symbol;Acc:HGNC:6273]	-	10	0	0.0715622	0
ENSG00000276691	-6.49233	90.0297	0.00243493	0.279585	AC004466.3	12	47788426	47788971	+	546	antisense	novel transcript, antisense to HDAC7	-	0	12	0	1.10769
ENSG00000175746	-6.49233	90.0297	0.00243493	0.279585	C15orf54	15	39250684	39254845	+	3078	lincRNA	chromosome 15 open reading frame 54 (putative) [Source:HGNC Symbol;Acc:HGNC:33797]	-	0	12	0	0.196492
ENSG00000174028	1.51754	2.86302	0.00251008	0.286801	FAM3C2	X	23075758	23076767	+	681	processed_pseudogene	family with sequence similarity 3 member C2 (pseudogene) [Source:HGNC Symbol;Acc:HGNC:34501]	-	103	42	8.93817	3.10838
ENSG00000081148	-2.07979	4.22745	0.00255104	0.290059	IMPG2	3	101222546	101320560	-	8337	protein_coding	interphotoreceptor matrix proteoglycan 2 [Source:HGNC Symbol;Acc:HGNC:18362]	-	8	40	0.0567073	0.241814
ENSG00000236345	-1.30369	2.4686	0.00258748	0.292775	AL354719.2	6	63806836	63822642	+	1454	antisense	novel transcript	-	216	624	8.77906	21.6298
ENSG00000239388	-1.93135	3.81411	0.00261795	0.293164	ASB14	3	57268347	57292682	-	3232	protein_coding	ankyrin repeat and SOCS box containing 14 [Source:HGNC Symbol;Acc:HGNC:19766]	-	10	45	0.182847	0.701734
ENSG00000154319	2.15253	4.44606	0.002639	0.293164	FAM167A	8	11421463	11475908	-	5076	protein_coding	family with sequence similarity 167 member A [Source:HGNC Symbol;Acc:HGNC:15549]	-	27	7	0.314341	0.0695037
ENSG00000250995	-1.82263	3.53724	0.00264123	0.293164	AL391280.1	X	118769796	118770857	+	1062	processed_pseudogene	novel pseudogene	-	12	50	0.667752	2.37289
ENSG00000234527	-1.85112	3.6078	0.00264123	0.293164	PCDH9-AS1	13	66303871	66323561	+	532	antisense	PCDH9 antisense RNA 1 [Source:HGNC Symbol;Acc:HGNC:39897]	-	12	51	1.33299	4.83159
ENSG00000112299	-1.44563	2.72381	0.00269624	0.297852	VNN1	6	132681590	132714049	-	3106	protein_coding	vanin 1 [Source:HGNC Symbol;Acc:HGNC:12705]	-	47	150	0.894242	2.434
ENSG00000226800	-2.11804	4.34105	0.00281747	0.303123	CACTIN-AS1	19	3607247	3613930	+	1913	antisense	CACTIN antisense RNA 1 [Source:HGNC Symbol;Acc:HGNC:31391]	-	7	36	0.216243	0.94846
ENSG00000235681	-2.15743	4.46118	0.00281747	0.303123	AC245884.3	19	54446830	54447047	+	218	processed_pseudogene	LSM6 homolog, U6 small nuclear RNA associated (S. cerevisiae) (LSM6) pseudogene	-	7	37	1.89758	8.55415
ENSG00000228126	-2.15743	4.46118	0.00281747	0.303123	FALEC	1	150515757	150518032	+	566	lincRNA	focally amplified long non-coding RNA in epithelial cancer [Source:HGNC Symbol;Acc:HGNC:43713]	-	7	37	0.73087	3.29471
ENSG00000255893	-2.11804	4.34105	0.00281747	0.303123	AP000786.1	11	94472908	94473570	-	581	antisense	novel transcript	-	7	36	0.712001	3.1229
ENSG00000231023	-2.15743	4.46118	0.00281747	0.303123	LINC00326	6	133088080	133106578	+	2515	lincRNA	long intergenic non-protein coding RNA 326 [Source:HGNC Symbol;Acc:HGNC:41926]	-	7	37	0.164482	0.741473
ENSG00000188687	-1.74365	3.3488	0.00282199	0.303123	SLC4A5	2	74216242	74343414	-	8025	protein_coding	solute carrier family 4 member 5 [Source:HGNC Symbol;Acc:HGNC:18168]	-	16	63	0.117824	0.395664
ENSG00000181007	-1.48549	2.80013	0.00288886	0.306768	ZFP82	19	36383120	36418656	-	7506	protein_coding	ZFP82 zinc finger protein [Source:HGNC Symbol;Acc:HGNC:28682]	zf-C2H2	39	128	0.307054	0.859474
ENSG00000107159	-1.9823	3.95122	0.00289243	0.306768	CA9	9	35673856	35681159	+	1670	protein_coding	carbonic anhydrase 9 [Source:HGNC Symbol;Acc:HGNC:1383]	-	9	42	0.318482	1.26755
ENSG00000144395	-1.33901	2.52978	0.00289541	0.306768	CCDC150	2	196639554	196763490	+	9683	protein_coding	coiled-coil domain containing 150 [Source:HGNC Symbol;Acc:HGNC:26834]	-	104	308	0.63472	1.60314
ENSG00000244490	-1.85789	3.62477	0.00290973	0.306891	RWDD4P1	7	105301522	105302086	+	565	processed_pseudogene	RWD domain containing 4 pseudogene 1 [Source:HGNC Symbol;Acc:HGNC:23753]	-	11	47	1.15054	4.19258
ENSG00000275560	-2.21151	4.63158	0.00312822	0.328449	AC008115.3	12	12718973	12719521	+	549	sense_intronic	novel transcript	-	6	33	0.645859	3.02951
ENSG00000105894	1.87758	3.67459	0.0032271	0.334313	PTN	7	137227341	137343865	-	1713	protein_coding	pleiotrophin [Source:HGNC Symbol;Acc:HGNC:9630]	-	38	12	1.31095	0.353066
ENSG00000155760	1.87758	3.67459	0.0032271	0.334313	FZD7	2	202034587	202038445	+	3859	protein_coding	frizzled class receptor 7 [Source:HGNC Symbol;Acc:HGNC:4045]	-	38	12	0.581926	0.156725
ENSG00000247934	-1.89902	3.72961	0.0032271	0.334313	AC022364.1	12	28163298	28190738	-	2728	antisense	novel transcript, antisense to CCDC91	-	10	44	0.216628	0.812905
ENSG00000233461	-1.4211	2.67789	0.00329924	0.335709	AL445524.1	1	231522388	231528556	-	1021	antisense	novel transcript	-	51	160	2.95191	7.89816
ENSG00000268262	3.75711	13.5209	0.00334606	0.335709	AC011445.1	19	39314651	39320858	-	877	sense_overlapping	novel transcript, sense overlapping LRFN1	-	13	1	0.875996	0.0574688
ENSG00000261560	3.75711	13.5209	0.00334606	0.335709	AC007216.3	16	11881075	11882569	-	1495	sense_intronic	novel transcript, sense intronic to GSPT1	-	13	1	0.513879	0.0337124
ENSG00000261096	3.75711	13.5209	0.00334606	0.335709	AC073476.3	2	231809846	231812352	+	2507	sense_overlapping	novel transcript	-	13	1	0.306442	0.0201038
ENSG00000162641	-3.53611	11.6005	0.00334606	0.335709	AKNAD1	1	108815898	108858228	-	4915	protein_coding	AKNA domain containing 1 [Source:HGNC Symbol;Acc:HGNC:28398]	-	1	15	0.0120236	0.153815
ENSG00000277463	-3.53611	11.6005	0.00334606	0.335709	AC080038.2	17	62626031	62626453	+	423	lincRNA	novel transcript	-	1	15	0.139707	1.78724
ENSG00000166192	-1.50247	2.83328	0.00335718	0.335709	SENP8	15	72114258	72143688	+	5007	protein_coding	SUMO peptidase family member, NEDD8 specific [Source:HGNC Symbol;Acc:HGNC:22992]	-	31	103	0.365883	1.03679
ENSG00000261308	2.83465	7.13369	0.00338513	0.335709	FIGNL2	12	51817840	51848766	-	4973	protein_coding	fidgetin like 2 [Source:HGNC Symbol;Acc:HGNC:13287]	-	19	3	0.225784	0.0304042
ENSG00000271327	-2.53585	5.79919	0.00338513	0.335709	AC010201.2	12	89367807	89369301	+	1495	lincRNA	novel transcript	-	3	21	0.118587	0.707961
ENSG00000240616	-2.53585	5.79919	0.00338513	0.335709	RPS6P25	19	12894133	12894880	+	748	processed_pseudogene	ribosomal protein S6 pseudogene 25 [Source:HGNC Symbol;Acc:HGNC:35948]	-	3	21	0.237016	1.41498
ENSG00000159167	1.58703	3.00431	0.00347918	0.335709	STC1	8	23841915	23854807	-	4149	protein_coding	stanniocalcin 1 [Source:HGNC Symbol;Acc:HGNC:11373]	-	67	26	0.954311	0.315836
ENSG00000172058	-2.3322	5.03572	0.00348955	0.335709	SERF1A	5	70900665	70918530	+	3285	protein_coding	small EDRK-rich factor 1A [Source:HGNC Symbol;Acc:HGNC:10755]	-	5	30	0.0899484	0.460275
ENSG00000225544	-2.3322	5.03572	0.00348955	0.335709	AC245452.2	22	21885282	21885673	-	392	processed_pseudogene	pseudogene similar to part of metallophosphoesterase 1 (MPPE1)	-	5	30	0.753776	3.85715
ENSG00000206077	3.14263	8.8313	0.00351516	0.335709	ZDHHC11B	5	710360	766952	-	4840	protein_coding	zinc finger DHHC-type containing 11B [Source:HGNC Symbol;Acc:HGNC:32962]	-	16	2	0.195359	0.0208265
ENSG00000272097	-2.87352	7.3285	0.00351516	0.335709	AL024498.1	6	10743324	10747663	-	1471	lincRNA	novel transcript	-	2	18	0.0803482	0.616725
ENSG00000271971	-2.87352	7.3285	0.00351516	0.335709	AC120053.1	8	93715378	93716113	-	736	antisense	novel transcript, antisense to FAM92A1	-	2	18	0.160587	1.23261
ENSG00000276740	3.14263	8.8313	0.00351516	0.335709	AL445649.1	13	107465984	107466674	-	691	sense_intronic	novel transcript, sense intronic to FAM155A	-	16	2	1.36836	0.145876
ENSG00000251593	3.14263	8.8313	0.00351516	0.335709	MSNP1	5	25909503	25911234	+	1732	processed_pseudogene	moesin pseudogene 1 [Source:HGNC Symbol;Acc:HGNC:7374]	-	16	2	0.545922	0.0581987
ENSG00000236453	-2.87352	7.3285	0.00351516	0.335709	AC003092.1	7	94022833	94066661	+	1064	lincRNA	novel transcript	-	2	18	0.111083	0.852633
ENSG00000255455	-1.53482	2.89752	0.00352863	0.335709	AP003486.1	11	130866254	130870247	-	3994	lincRNA	uncharacterized LOC103611081 [Source:NCBI gene;Acc:103611081]	-	25	85	0.369905	1.07261
ENSG00000204962	1.99454	3.9849	0.00360343	0.338679	PCDHA8	5	140841187	141012344	+	5482	protein_coding	protocadherin alpha 8 [Source:HGNC Symbol;Acc:HGNC:8674]	-	31	9	0.334181	0.0827437
ENSG00000164841	-2.07756	4.22091	0.00360343	0.338679	TMEM74	8	108606850	108787615	-	2877	protein_coding	transmembrane protein 74 [Source:HGNC Symbol;Acc:HGNC:26409]	-	7	35	0.143786	0.61314
ENSG00000186399	-2.07756	4.22091	0.00360343	0.338679	GOLGA8R	15	30403740	30414162	-	4433	protein_coding	golgin A8 family member R [Source:HGNC Symbol;Acc:HGNC:44407]	-	7	35	0.0933166	0.397926
ENSG00000162687	-2.49474	5.63626	0.00390492	0.347679	KCNT2	1	196225779	196609225	-	7100	protein_coding	potassium sodium-activated channel subfamily T member 2 [Source:HGNC Symbol;Acc:HGNC:18866]	-	4	27	0.0332936	0.191662
ENSG00000121903	-1.62832	3.09154	0.00392803	0.347679	ZSCAN20	1	33472645	33496507	+	5308	protein_coding	zinc finger and SCAN domain containing 20 [Source:HGNC Symbol;Acc:HGNC:13093]	zf-C2H2	19	69	0.211535	0.655163
ENSG00000163357	2.01554	4.04332	0.00406587	0.347679	DCST1	1	155033824	155050930	+	3193	protein_coding	DC-STAMP domain containing 1 [Source:HGNC Symbol;Acc:HGNC:26539]	-	28	8	0.518224	0.126277
ENSG00000189212	-1.65679	3.15314	0.00409161	0.347679	DPY19L2P1	7	35079989	35186041	-	8272	transcribed_unprocessed_pseudogene	DPY19L2 pseudogene 1 [Source:HGNC Symbol;Acc:HGNC:22305]	-	17	63	0.12145	0.38385
ENSG00000112303	-6.36825	82.6105	0.00417417	0.347679	VNN2	6	132743870	132763459	-	2633	protein_coding	vanin 2 [Source:HGNC Symbol;Acc:HGNC:12706]	-	0	11	0	0.210559
ENSG00000133424	6.30589	79.1158	0.00417417	0.347679	LARGE1	22	33162226	33922841	-	10687	protein_coding	LARGE xylosyl- and glucuronyltransferase 1 [Source:HGNC Symbol;Acc:HGNC:6511]	-	9	0	0.0497674	0
ENSG00000278626	6.30589	79.1158	0.00417417	0.347679	AC023310.4	15	20642799	20643448	-	650	lincRNA	novel transcript	-	9	0	0.818253	0
ENSG00000155265	6.30589	79.1158	0.00417417	0.347679	GOLGA7B	10	97850239	97871580	+	6458	protein_coding	golgin A7 family member B [Source:HGNC Symbol;Acc:HGNC:31668]	-	9	0	0.0823575	0
ENSG00000119938	-6.36825	82.6105	0.00417417	0.347679	PPP1R3C	10	91628442	91633054	-	2524	protein_coding	protein phosphatase 1 regulatory subunit 3C [Source:HGNC Symbol;Acc:HGNC:9293]	-	0	11	0	0.219652
ENSG00000108798	-6.36825	82.6105	0.00417417	0.347679	ABI3	17	49210227	49223225	+	2456	protein_coding	ABI family member 3 [Source:HGNC Symbol;Acc:HGNC:29859]	-	0	11	0	0.225733
ENSG00000235138	-6.36825	82.6105	0.00417417	0.347679	AL445931.1	9	134054290	134058805	+	2112	antisense	uncharacterized LOC100130548 [Source:NCBI gene;Acc:100130548]	-	0	11	0	0.262501
ENSG00000261819	6.30589	79.1158	0.00417417	0.347679	AC138932.3	16	14988259	14990160	-	1902	processed_pseudogene	uncharacterized protein KIAA2013 [Source:NCBI gene;Acc:102724984]	-	9	0	0.279634	0
ENSG00000114279	6.30589	79.1158	0.00417417	0.347679	FGF12	3	192139395	192767764	-	7355	protein_coding	fibroblast growth factor 12 [Source:HGNC Symbol;Acc:HGNC:3668]	-	9	0	0.0723133	0
ENSG00000248668	6.30589	79.1158	0.00417417	0.347679	OXCT1-AS1	5	41870030	41872241	+	2065	processed_transcript	OXCT1 antisense RNA 1 [Source:HGNC Symbol;Acc:HGNC:40423]	-	9	0	0.257562	0
ENSG00000226744	-6.36825	82.6105	0.00417417	0.347679	AC005326.1	7	97870167	97870289	+	123	processed_pseudogene	pseudogene similar to asparagine synthetase ASNS	-	0	11	0	4.50733
ENSG00000283971	6.30589	79.1158	0.00417417	0.347679	MIR4442	3	25664873	25664939	-	67	miRNA	microRNA 4442 [Source:HGNC Symbol;Acc:HGNC:41718]	-	9	0	7.93828	0
ENSG00000228661	6.30589	79.1158	0.00417417	0.347679	AC090587.1	11	3854318	3855509	-	494	antisense	uncharacterized LOC105376527 [Source:NCBI gene;Acc:105376527]	-	9	0	1.07665	0
ENSG00000091137	-6.36825	82.6105	0.00417417	0.347679	SLC26A4	7	107660635	107717809	+	5800	protein_coding	solute carrier family 26 member 4 [Source:HGNC Symbol;Acc:HGNC:8818]	-	0	11	0	0.0955864
ENSG00000211452	6.30589	79.1158	0.00417417	0.347679	DIO1	1	53891239	53911086	+	2282	protein_coding	iodothyronine deiodinase 1 [Source:HGNC Symbol;Acc:HGNC:2883]	-	9	0	0.23307	0
ENSG00000258001	6.30589	79.1158	0.00417417	0.347679	AC126614.1	12	57431116	57433935	+	548	lincRNA	novel transcript	-	9	0	0.970556	0
ENSG00000279569	6.30589	79.1158	0.00417417	0.347679	AC020763.4	16	70661667	70665836	+	4170	TEC	novel transcript	-	9	0	0.127545	0
ENSG00000219470	-6.36825	82.6105	0.00417417	0.347679	AL355802.1	6	43538822	43539703	-	882	processed_pseudogene	40S ribosomal protein S2 (RPS2) pseudogene	-	0	11	0	0.628573
ENSG00000254855	6.30589	79.1158	0.00417417	0.347679	AP001107.8	11	66264777	66265666	-	479	antisense	novel transcript	-	9	0	1.11036	0
ENSG00000185002	-6.36825	82.6105	0.00417417	0.347679	RFX6	6	116877212	116932163	+	4093	protein_coding	regulatory factor X6 [Source:HGNC Symbol;Acc:HGNC:21478]	RFX	0	11	0	0.135451
ENSG00000277371	-6.36825	82.6105	0.00417417	0.347679	RF00017	10	125869295	125869576	+	282	misc_RNA		-	0	11	0	1.96596
ENSG00000284783	-6.36825	82.6105	0.00417417	0.347679	AC091057.5	15	30750406	30759859	+	243	transcribed_unprocessed_pseudogene	OTU deubiquitinase 7A (OTUD7A), pseudogene	-	0	11	0	2.28149
ENSG00000266975	6.30589	79.1158	0.00417417	0.347679	FARSA-AS1	19	12930522	12933296	+	241	antisense	FARSA antisense RNA 1 [Source:HGNC Symbol;Acc:HGNC:50479]	-	9	0	2.20691	0
ENSG00000207331	-6.36825	82.6105	0.00417417	0.347679	RNU6-1263P	3	98908459	98908564	+	106	snRNA	RNA, U6 small nuclear 1263, pseudogene [Source:HGNC Symbol;Acc:HGNC:48226]	-	0	11	0	5.2302
ENSG00000225192	6.30589	79.1158	0.00417417	0.347679	ZNF33BP1	10	37794276	37796109	-	1834	processed_pseudogene	zinc finger protein 33B pseudogene 1 [Source:HGNC Symbol;Acc:HGNC:44975]	-	9	0	0.290003	0
ENSG00000145879	-6.36825	82.6105	0.00417417	0.347679	SPINK7	5	148312419	148315922	+	1545	protein_coding	serine peptidase inhibitor, Kazal type 7 (putative) [Source:HGNC Symbol;Acc:HGNC:24643]	-	0	11	0	0.358836
ENSG00000096395	6.30589	79.1158	0.00417417	0.347679	MLN	6	33794673	33804011	-	566	protein_coding	motilin [Source:HGNC Symbol;Acc:HGNC:7141]	-	9	0	0.93969	0
ENSG00000188825	-1.7082	3.26754	0.0041765	0.347679	LINC00910	17	43369845	43389199	-	6895	lincRNA	long intergenic non-protein coding RNA 910 [Source:HGNC Symbol;Acc:HGNC:44361]	-	13	50	0.111421	0.365483
ENSG00000213189	-1.38679	2.61496	0.00419164	0.347698	BTF3L4P2	2	159003975	159004320	+	346	processed_pseudogene	basic transcription factor 3 like 4 pseudogene 2 [Source:HGNC Symbol;Acc:HGNC:39646]	-	47	144	8.0275	20.9758
ENSG00000140853	-1.71703	3.2876	0.0042729	0.353181	NLRC5	16	56989485	57083531	+	12386	protein_coding	NLR family CARD domain containing 5 [Source:HGNC Symbol;Acc:HGNC:29933]	-	15	58	0.071568	0.236009
ENSG00000104953	-1.79534	3.47097	0.00434191	0.357617	TLE6	19	2977446	2995184	+	3652	protein_coding	transducin like enhancer of split 6 [Source:HGNC Symbol;Acc:HGNC:30788]	-	11	45	0.178	0.621031
ENSG00000230409	1.65468	3.14854	0.00447239	0.364856	TCEA1P2	3	37275693	37276598	+	906	processed_pseudogene	transcription elongation factor A1 pseudogene 2 [Source:HGNC Symbol;Acc:HGNC:29891]	-	46	17	3.00046	0.945697
ENSG00000180818	-1.67341	3.18968	0.00452276	0.364856	HOXC10	12	53985065	53990279	+	2331	protein_coding	homeobox C10 [Source:HGNC Symbol;Acc:HGNC:5122]	Homeobox	16	60	0.405636	1.2973
ENSG00000165474	1.39005	2.62089	0.00456645	0.364856	GJB2	13	20187463	20193010	-	2546	protein_coding	gap junction protein beta 2 [Source:HGNC Symbol;Acc:HGNC:4284]	-	101	45	2.34435	0.890811
ENSG00000253522	-1.27518	2.42029	0.00459889	0.364856	MIR3142HG	5	160438594	160487426	+	2377	lincRNA	MIR3142 host gene [Source:HGNC Symbol;Acc:HGNC:51944]	-	102	289	2.53589	6.12774
ENSG00000181826	1.94742	3.85683	0.00461337	0.364856	RELL1	4	37590800	37686376	-	1947	protein_coding	RELT like 1 [Source:HGNC Symbol;Acc:HGNC:27379]	-	30	9	0.910571	0.232974
ENSG00000162482	1.94742	3.85683	0.00461337	0.364856	AKR7A3	1	19282558	19289250	-	1710	protein_coding	aldo-keto reductase family 7 member A3 [Source:HGNC Symbol;Acc:HGNC:390]	-	30	9	1.03677	0.265264
ENSG00000260018	2.04199	4.11812	0.00462106	0.364856	AC040169.1	16	84117051	84117571	+	521	antisense	novel transcript, antisense to MBTPS1	-	25	7	2.8357	0.677161
ENSG00000227848	-2.28351	4.86861	0.00462106	0.364856	SUCLA2-AS1	13	48001389	48002552	+	552	antisense	SUCLA2 antisense RNA 1 [Source:HGNC Symbol;Acc:HGNC:39965]	-	5	29	0.53529	2.64783
ENSG00000081665	-1.57548	2.98034	0.00473977	0.364856	ZNF506	19	19785839	19821751	-	8414	protein_coding	zinc finger protein 506 [Source:HGNC Symbol;Acc:HGNC:23780]	zf-C2H2	20	70	0.140471	0.419302
ENSG00000268362	-1.63376	3.1032	0.00476466	0.364856	AC092279.1	19	24033445	24066909	+	2191	lincRNA	novel transcript	-	17	62	0.458527	1.4262
ENSG00000183691	1.19686	2.29241	0.004791	0.364856	NOG	17	56593699	56595590	+	1892	protein_coding	noggin [Source:HGNC Symbol;Acc:HGNC:7866]	-	927	473	28.9546	12.6
ENSG00000166323	-2.46592	5.5248	0.00484911	0.364856	C11orf65	11	108308519	108467531	-	3524	protein_coding	chromosome 11 open reading frame 65 [Source:HGNC Symbol;Acc:HGNC:28519]	-	3	20	0.0503088	0.286039
ENSG00000282393	-2.46592	5.5248	0.00484911	0.364856	AC016588.2	19	248551	251571	-	3021	lincRNA	novel transcript	-	3	20	0.0586853	0.333665
ENSG00000279425	-2.46592	5.5248	0.00484911	0.364856	AC092279.2	19	24078481	24080669	+	2189	TEC	TEC	-	3	20	0.0809905	0.460485
ENSG00000261971	-1.39429	2.62859	0.00486701	0.364856	MMP25-AS1	16	3037403	3059370	-	7244	antisense	MMP25 antisense RNA 1 [Source:HGNC Symbol;Acc:HGNC:51372]	-	37	114	0.301844	0.793155
ENSG00000247735	-1.83212	3.5606	0.00491367	0.364856	AC120114.1	16	29926836	29928933	+	1762	antisense	uncharacterized LOC107984836 [Source:NCBI gene;Acc:107984836]	-	10	42	0.335392	1.20136
ENSG00000246174	-1.83212	3.5606	0.00491367	0.364856	KCTD21-AS1	11	78139771	78175323	+	4095	antisense	KCTD21 antisense RNA 1 [Source:HGNC Symbol;Acc:HGNC:48674]	-	10	42	0.144313	0.516924
ENSG00000158427	1.53163	2.89112	0.00494375	0.364856	TMSB15B	X	103918896	103966712	+	5525	protein_coding	thymosin beta 15B [Source:HGNC Symbol;Acc:HGNC:28612]	-	62	25	0.66316	0.228055
ENSG00000248079	-1.67914	3.20236	0.00501982	0.364856	DPH6-DT	15	35546195	35859001	+	1531	lincRNA	DPH6 divergent transcript [Source:HGNC Symbol;Acc:HGNC:44147]	-	13	49	0.501796	1.61307
ENSG00000155158	1.58634	3.00286	0.00503207	0.364856	TTC39B	9	15163622	15307360	-	12208	protein_coding	tetratricopeptide repeat domain 39B [Source:HGNC Symbol;Acc:HGNC:23704]	-	49	19	0.237198	0.0784405
ENSG00000178409	1.37264	2.58943	0.00510247	0.364856	BEND3	6	107065182	107115269	-	6839	protein_coding	BEN domain containing 3 [Source:HGNC Symbol;Acc:HGNC:23040]	-	102	46	0.881386	0.338998
ENSG00000232888	-1.92832	3.80612	0.00512978	0.364856	RPS11P5	12	132825701	132826184	+	484	processed_pseudogene	ribosomal protein S11 pseudogene 5 [Source:HGNC Symbol;Acc:HGNC:36312]	-	8	36	0.976795	3.74877
ENSG00000256124	-1.92832	3.80612	0.00512978	0.364856	LINC01152	17	72030291	72041297	+	4019	lincRNA	long intergenic non-protein coding RNA 1152 [Source:HGNC Symbol;Acc:HGNC:16752]	-	8	36	0.117633	0.451457
ENSG00000214216	-1.51875	2.86542	0.00514179	0.364856	IQCJ	3	158962928	159266307	+	2923	protein_coding	IQ motif containing J [Source:HGNC Symbol;Acc:HGNC:32406]	-	22	74	0.444787	1.27595
ENSG00000183092	3.0502	8.28329	0.00524731	0.364856	BEGAIN	14	100537147	100587413	-	7878	protein_coding	brain enriched guanylate kinase associated [Source:HGNC Symbol;Acc:HGNC:24163]	-	15	2	0.112521	0.0127952
ENSG00000270964	-2.79169	6.92439	0.00524731	0.364856	AC016355.1	15	67541072	67542604	-	1533	lincRNA	novel transcript	-	2	17	0.0770986	0.558905
ENSG00000082196	3.0502	8.28329	0.00524731	0.364856	C1QTNF3	5	34019448	34043832	-	3576	protein_coding	C1q and TNF related 3 [Source:HGNC Symbol;Acc:HGNC:14326]	-	15	2	0.247886	0.028188
ENSG00000265666	3.0502	8.28329	0.00524731	0.364856	RARA-AS1	17	40340867	40343136	-	1790	antisense	RARA antisense RNA 1 [Source:HGNC Symbol;Acc:HGNC:49577]	-	15	2	0.495218	0.056313
ENSG00000276692	-2.79169	6.92439	0.00524731	0.364856	CR769767.2	9	39873931	39874390	-	460	processed_pseudogene	novel pseudogene	-	2	17	0.256939	1.86261
ENSG00000241362	3.0502	8.28329	0.00524731	0.364856	RPL36AP43	15	89687937	89688243	-	307	processed_pseudogene	ribosomal protein L36a pseudogene 43 [Source:HGNC Symbol;Acc:HGNC:36791]	-	15	2	2.88743	0.328339
ENSG00000242078	-2.79169	6.92439	0.00524731	0.364856	AC084864.1	7	129783370	129785185	-	305	lincRNA	novel transcript	-	2	17	0.387515	2.80919
ENSG00000258789	-2.79169	6.92439	0.00524731	0.364856	AL162171.1	14	88551597	88552493	+	718	antisense	novel transcript, antisense to PTPN21	-	2	17	0.164613	1.19332
ENSG00000278607	-2.79169	6.92439	0.00524731	0.364856	AC015819.2	18	75070197	75071091	-	555	lincRNA	novel transcript	-	2	17	0.212959	1.54379
ENSG00000227060	-2.79169	6.92439	0.00524731	0.364856	LINC00629	X	134549973	134559923	+	909	lincRNA	long intergenic non-protein coding RNA 629 [Source:HGNC Symbol;Acc:HGNC:44262]	-	2	17	0.130024	0.942576
ENSG00000254526	-2.79169	6.92439	0.00524731	0.364856	AC090791.1	11	29159956	29266734	+	492	lincRNA	novel transcript	-	2	17	0.240228	1.74147
ENSG00000228253	-1.17785	2.26239	0.00526575	0.364856	MT-ATP8	MT	8366	8572	+	207	protein_coding	mitochondrially encoded ATP synthase membrane subunit 8 [Source:HGNC Symbol;Acc:HGNC:7415]	-	527	1395	150.452	339.653
ENSG00000147082	3.64269	12.4899	0.00528154	0.364856	CCNB3	X	50202713	50351910	+	5408	protein_coding	cyclin B3 [Source:HGNC Symbol;Acc:HGNC:18709]	-	12	1	0.13113	0.00931955
ENSG00000176092	3.64269	12.4899	0.00528154	0.364856	CRYBG2	1	26321698	26360080	-	6895	protein_coding	crystallin beta-gamma domain containing 2 [Source:HGNC Symbol;Acc:HGNC:17295]	-	12	1	0.10285	0.00730966
ENSG00000160801	-3.43749	10.834	0.00528154	0.364856	PTH1R	3	46877746	46903799	+	2758	protein_coding	parathyroid hormone 1 receptor [Source:HGNC Symbol;Acc:HGNC:9608]	-	1	14	0.0214271	0.255838
ENSG00000121075	-3.43749	10.834	0.00528154	0.364856	TBX4	17	61452404	61485110	+	3996	protein_coding	T-box 4 [Source:HGNC Symbol;Acc:HGNC:11603]	T-box	1	14	0.0147888	0.176577
ENSG00000078795	3.64269	12.4899	0.00528154	0.364856	PKD2L2	5	137887968	137942747	+	4653	protein_coding	polycystin 2 like 2, transient receptor potential cation channel [Source:HGNC Symbol;Acc:HGNC:9012]	-	12	1	0.152408	0.0108317
ENSG00000230568	-3.43749	10.834	0.00528154	0.364856	SF3A3P1	20	3489529	3491005	-	1477	processed_pseudogene	splicing factor 3a, subunit 3 pseudogene 1 [Source:HGNC Symbol;Acc:HGNC:16576]	-	1	14	0.0400109	0.477726
ENSG00000183444	-3.43749	10.834	0.00528154	0.364856	OR7E38P	7	97966090	97967074	-	985	unprocessed_pseudogene	olfactory receptor family 7 subfamily E member 38 pseudogene [Source:HGNC Symbol;Acc:HGNC:8411]	-	1	14	0.059996	0.716347
ENSG00000279488	-3.43749	10.834	0.00528154	0.364856	AC004623.1	19	1372238	1374364	-	2127	TEC	TEC	-	1	14	0.0277838	0.331736
ENSG00000223573	3.64269	12.4899	0.00528154	0.364856	TINCR	19	5558167	5578349	-	4429	protein_coding	TINCR ubiquitin domain containing [Source:HGNC Symbol;Acc:HGNC:14607]	-	12	1	0.160116	0.0113796
ENSG00000261798	-3.43749	10.834	0.00528154	0.364856	AL033527.3	1	39788976	39790171	+	1196	antisense	uncharacterized LOC101929536 [Source:NCBI gene;Acc:101929536]	-	1	14	0.0494114	0.589968
ENSG00000254634	-3.43749	10.834	0.00528154	0.364856	SMG1P6	16	29425800	29447026	-	2930	unprocessed_pseudogene	SMG1 pseudogene 6 [Source:HGNC Symbol;Acc:HGNC:49863]	-	1	14	0.0201693	0.24082
ENSG00000270659	3.64269	12.4899	0.00528154	0.364856	AC079610.2	2	213152970	213153659	+	690	lincRNA	novel transcript	-	12	1	1.02776	0.0730436
ENSG00000256238	3.64269	12.4899	0.00528154	0.364856	SUPT16HP1	12	16399274	16402406	-	3133	processed_pseudogene	SPT16 homolog, facilitates chromatin remodeling subunit pseudogene 1 [Source:HGNC Symbol;Acc:HGNC:31388]	-	12	1	0.226349	0.0160869
ENSG00000267507	-3.43749	10.834	0.00528154	0.364856	AC010327.2	19	55119250	55120383	-	488	processed_pseudogene	nuclear transport factor 2, pseudogene	-	1	14	0.121099	1.4459
ENSG00000138379	-3.43749	10.834	0.00528154	0.364856	MSTN	2	190055697	190062729	-	2822	protein_coding	myostatin [Source:HGNC Symbol;Acc:HGNC:4223]	-	1	14	0.0209412	0.250036
ENSG00000198673	-2.44057	5.42855	0.00528628	0.364856	FAM19A2	12	61708259	62279150	-	9255	protein_coding	family with sequence similarity 19 member A2, C-C motif chemokine like [Source:HGNC Symbol;Acc:HGNC:21589]	-	4	26	0.0255413	0.141589
ENSG00000204778	2.07632	4.2173	0.00528628	0.364856	CBWD4P	9	65287914	65323015	-	655	unprocessed_pseudogene	COBW domain containing 4 pseudogene [Source:HGNC Symbol;Acc:HGNC:18520]	-	22	6	1.98491	0.46168
ENSG00000185013	-2.44057	5.42855	0.00528628	0.364856	NT5C1B	2	18562872	18589572	-	3987	protein_coding	5'-nucleotidase, cytosolic IB [Source:HGNC Symbol;Acc:HGNC:17818]	-	4	26	0.0592888	0.328669
ENSG00000259523	1.96329	3.89951	0.00529072	0.364856	AC022613.2	15	29822631	29824081	+	1451	antisense	novel transcript, antisense to TJP1	-	27	8	1.09965	0.277878
ENSG00000225269	-1.65863	3.15716	0.00533667	0.366939	LINC00705	10	4655427	4662419	+	1745	lincRNA	long intergenic non-protein coding RNA 705 [Source:HGNC Symbol;Acc:HGNC:27874]	-	14	52	0.474123	1.50189
ENSG00000188171	-1.52591	2.87968	0.00565482	0.387671	ZNF626	19	20620061	20661596	-	6713	protein_coding	zinc finger protein 626 [Source:HGNC Symbol;Acc:HGNC:30461]	zf-C2H2	21	71	0.184868	0.533056
ENSG00000205609	1.44466	2.72199	0.00570156	0.389402	EIF3CL	16	28379579	28403879	-	3091	protein_coding	eukaryotic translation initiation factor 3 subunit C like [Source:HGNC Symbol;Acc:HGNC:26347]	-	70	30	1.33831	0.489163
ENSG00000230562	1.42073	2.6772	0.005716	0.389402	FAM133DP	2	157379724	157380414	-	691	processed_pseudogene	family with sequence similarity 133 member D, pseudogene [Source:HGNC Symbol;Acc:HGNC:44192]	-	78	34	6.67076	2.47989
ENSG00000086544	1.25381	2.3847	0.00573019	0.389402	ITPKC	19	40717103	40740860	+	3385	protein_coding	inositol-trisphosphate 3-kinase C [Source:HGNC Symbol;Acc:HGNC:14897]	-	204	100	3.56148	1.48892
ENSG00000108176	-1.21463	2.32082	0.00583763	0.395241	DNAJC12	10	67796665	67838166	-	2121	protein_coding	DnaJ heat shock protein family (Hsp40) member C12 [Source:HGNC Symbol;Acc:HGNC:28908]	-	134	364	3.73356	8.64952
ENSG00000260528	-1.39854	2.63635	0.00585002	0.395241	FAM157C	16	90102271	90178344	+	4524	lincRNA	family with sequence similarity 157 member C [Source:HGNC Symbol;Acc:HGNC:34081]	-	33	102	0.431072	1.13634
ENSG00000129167	1.8987	3.72876	0.00591186	0.398265	TPH1	11	18017564	18042426	-	5626	protein_coding	tryptophan hydroxylase 1 [Source:HGNC Symbol;Acc:HGNC:12008]	-	29	9	0.304619	0.0806258
ENSG00000212907	-1.14298	2.20836	0.00595247	0.399845	MT-ND4L	MT	10470	10766	+	297	protein_coding	mitochondrially encoded NADH:ubiquinone oxidoreductase core subunit 4L [Source:HGNC Symbol;Acc:HGNC:7460]	-	13862	35813	2758.21	6077.37
ENSG00000188483	1.26303	2.39999	0.00597567	0.40025	IER5L	9	129175552	129178262	-	2711	protein_coding	immediate early response 5 like [Source:HGNC Symbol;Acc:HGNC:23679]	-	193	94	4.20713	1.74755
ENSG00000184524	1.48922	2.80737	0.00605602	0.400999	CEND1	11	787104	790123	-	1649	protein_coding	cell cycle exit and neuronal differentiation 1 [Source:HGNC Symbol;Acc:HGNC:24153]	-	65	27	2.32944	0.825229
ENSG00000268471	-1.32545	2.5061	0.00606392	0.400999	MIR4453HG	4	152536264	152539263	+	3000	bidirectional_promoter_lncRNA	MIR4453 host gene [Source:HGNC Symbol;Acc:HGNC:25288]	-	47	138	0.925838	2.31841
ENSG00000214562	2.19628	4.58295	0.00607288	0.400999	NUTM2D	10	87357668	87370695	+	6985	protein_coding	NUT family member 2D [Source:HGNC Symbol;Acc:HGNC:23447]	-	20	5	0.169209	0.0360774
ENSG00000258938	2.50877	5.69134	0.00607288	0.400999	AL162311.3	14	35819224	35826765	-	2867	antisense	novel transcript, antisense to BRMS1L	-	20	4	0.41225	0.0703176
ENSG00000196553	2.19628	4.58295	0.00607288	0.400999	CCDC196	14	66411704	66498677	+	2824	protein_coding	coiled-coil domain containing 196 [Source:HGNC Symbol;Acc:HGNC:20100]	-	20	5	0.418527	0.0892353
ENSG00000215548	-2.23312	4.7015	0.00612771	0.403477	FRG1JP	9	63832127	63859641	-	931	unprocessed_pseudogene	FSHD region gene 1 family member J, pseudogene [Source:HGNC Symbol;Acc:HGNC:51768]	-	5	28	0.31738	1.51579
ENSG00000170323	-1.1461	2.21315	0.00632228	0.415116	FABP4	8	81478419	81483263	-	1396	protein_coding	fatty acid binding protein 4 [Source:HGNC Symbol;Acc:HGNC:3559]	-	806	2087	34.1199	75.3474
ENSG00000227507	-1.58655	3.00331	0.00646591	0.421582	LTB	6	31580525	31582522	-	1535	protein_coding	lymphotoxin beta [Source:HGNC Symbol;Acc:HGNC:6711]	-	17	60	0.654484	1.97004
ENSG00000132432	-1.13611	2.19787	0.00646624	0.421582	SEC61G	7	54752250	54759974	-	1842	protein_coding	Sec61 translocon gamma subunit [Source:HGNC Symbol;Acc:HGNC:18277]	-	1766	4541	56.6578	124.249
ENSG00000283445	-1.72995	3.31716	0.00649311	0.421582	AL136985.3	1	58715609	58771295	+	4739	lincRNA	novel transcript	-	11	43	0.137172	0.457313
ENSG00000221852	-1.72995	3.31716	0.00649311	0.421582	KRTAP1-5	17	41026026	41027202	-	1177	protein_coding	keratin associated protein 1-5 [Source:HGNC Symbol;Acc:HGNC:16777]	-	11	43	0.5523	1.8413
ENSG00000149927	-1.31496	2.48796	0.00652956	0.422092	DOC2A	16	30005509	30023270	-	6426	protein_coding	double C2 domain alpha [Source:HGNC Symbol;Acc:HGNC:2985]	-	47	137	0.432231	1.07451
ENSG00000263535	-1.36968	2.58413	0.00658314	0.422092	AK4P1	17	31345519	31346190	+	672	processed_pseudogene	adenylate kinase 4 pseudogene 1 [Source:HGNC Symbol;Acc:HGNC:364]	-	34	103	2.98998	7.72502
ENSG00000257671	-1.28775	2.44147	0.00661745	0.422092	KRT7-AS	12	52245048	52247448	-	1693	antisense	KRT7 antisense RNA 1 [Source:HGNC Symbol;Acc:HGNC:52643]	-	57	163	1.98965	4.85246
ENSG00000261652	-1.58729	3.00484	0.00668616	0.422092	C15orf65	15	55408548	55418764	+	843	protein_coding	chromosome 15 open reading frame 65 [Source:HGNC Symbol;Acc:HGNC:44654]	-	15	53	1.05153	3.16869
ENSG00000070669	-1.40107	2.64098	0.00682681	0.422092	ASNS	7	97852118	97872542	-	4455	protein_coding	asparagine synthetase (glutamine-hydrolyzing) [Source:HGNC Symbol;Acc:HGNC:753]	-	31	96	0.411218	1.08606
ENSG00000226054	-1.67105	3.18447	0.00688961	0.422092	MEMO1P1	21	36130489	36131376	+	888	processed_pseudogene	mediator of cell motility 1 pseudogene 1 [Source:HGNC Symbol;Acc:HGNC:23274]	-	12	45	0.798596	2.55406
ENSG00000246575	-1.67105	3.18447	0.00688961	0.422092	AC093162.2	2	85315041	85316529	+	704	unprocessed_pseudogene	retinol saturase (all-trans-retinol 13,14-reductase) (RESAT) pseudogene	-	12	45	1.00732	3.2216
ENSG00000147145	-2.07459	4.21224	0.00689176	0.422092	LPAR4	X	78747709	78757094	+	3113	protein_coding	lysophosphatidic acid receptor 4 [Source:HGNC Symbol;Acc:HGNC:4478]	-	6	30	0.113902	0.485706
ENSG00000182057	1.50469	2.83765	0.00695566	0.422092	OGFRP1	22	42269753	42275196	+	1451	lincRNA	opioid growth factor receptor pseudogene 1 [Source:HGNC Symbol;Acc:HGNC:50511]	-	56	23	2.28076	0.798899
ENSG00000255425	-2.39243	5.2504	0.00696616	0.422092	OR8G3P	11	124211707	124215828	+	1344	transcribed_unprocessed_pseudogene	olfactory receptor family 8 subfamily G member 3 pseudogene [Source:HGNC Symbol;Acc:HGNC:14698]	-	3	19	0.131911	0.712502
ENSG00000203392	-2.39243	5.2504	0.00696616	0.422092	AC105020.1	15	75678548	75680752	+	2205	antisense	novel transcript, antisense to CSPG4	-	3	19	0.0804028	0.434287
ENSG00000276302	-2.39243	5.2504	0.00696616	0.422092	AL021997.3	6	28267121	28281580	+	557	protein_coding	novel protein	-	3	19	0.318291	1.71921
ENSG00000088340	-1.18798	2.27834	0.00701333	0.422092	FER1L4	20	35558737	35607562	-	9067	transcribed_unitary_pseudogene	fer-1 like family member 4, pseudogene [Source:HGNC Symbol;Acc:HGNC:15801]	-	135	360	0.879891	2.00111
ENSG00000105499	-2.38428	5.22083	0.00716778	0.422092	PLA2G4C	19	48047843	48110817	-	6613	protein_coding	phospholipase A2 group IVC [Source:HGNC Symbol;Acc:HGNC:9037]	-	4	25	0.0357454	0.190534
ENSG00000285813	-2.38428	5.22083	0.00716778	0.422092	AP000813.1	11	105995185	105999213	+	3770	antisense	novel transcript, antisense to MSANTD4	-	4	25	0.0627014	0.334218
ENSG00000223756	-6.2325	75.1914	0.00724341	0.422092	TSSC2	11	3380961	3408978	+	3666	transcribed_unprocessed_pseudogene	tumor suppressing subtransferable candidate 2 pseudogene [Source:HGNC Symbol;Acc:HGNC:12384]	-	0	10	0	0.13748
ENSG00000248810	-6.2325	75.1914	0.00724341	0.422092	LINC02432	4	141319450	141332618	-	3750	lincRNA	long intergenic non-protein coding RNA 2432 [Source:HGNC Symbol;Acc:HGNC:53363]	-	0	10	0	0.1344
ENSG00000189292	-6.2325	75.1914	0.00724341	0.422092	ALKAL2	2	279558	288851	-	2191	protein_coding	ALK and LTK ligand 2 [Source:HGNC Symbol;Acc:HGNC:27683]	-	0	10	0	0.230032
ENSG00000113327	-6.2325	75.1914	0.00724341	0.422092	GABRG2	5	162000057	162162977	+	22914	protein_coding	gamma-aminobutyric acid type A receptor gamma2 subunit [Source:HGNC Symbol;Acc:HGNC:4087]	-	0	10	0	0.0219953
ENSG00000120055	-6.2325	75.1914	0.00724341	0.422092	C10orf95	10	102449837	102451543	-	1469	protein_coding	chromosome 10 open reading frame 95 [Source:HGNC Symbol;Acc:HGNC:25880]	-	0	10	0	0.343091
ENSG00000243304	-6.2325	75.1914	0.00724341	0.422092	AC008494.1	5	115264669	115265464	-	796	processed_pseudogene	ribosomal protein S2 (RPS2) pseudogene	-	0	10	0	0.633167
ENSG00000230207	-6.2325	75.1914	0.00724341	0.422092	RPL4P5	9	7477045	7478320	-	1276	processed_pseudogene	ribosomal protein L4 pseudogene 5 [Source:HGNC Symbol;Acc:HGNC:35699]	-	0	10	0	0.394985
ENSG00000271553	-6.2325	75.1914	0.00724341	0.422092	AC018638.7	7	128667043	128668156	+	1114	lincRNA	novel transcript	-	0	10	0	0.452425
ENSG00000258984	-6.2325	75.1914	0.00724341	0.422092	UBE2F-SCLY	2	237967014	238099412	+	3195	protein_coding	UBE2F-SCLY readthrough (NMD candidate) [Source:HGNC Symbol;Acc:HGNC:48339]	-	0	10	0	0.157747
ENSG00000258446	-6.2325	75.1914	0.00724341	0.422092	AL133153.1	14	91419449	91419751	+	303	processed_pseudogene	COX assembly mitochondrial protein homolog (S. cerevisiae) (CMC1) pseudogene	-	0	10	0	1.66337
ENSG00000199804	-6.2325	75.1914	0.00724341	0.422092	RNA5SP383	14	24158603	24158722	+	120	rRNA_pseudogene	RNA, 5S ribosomal pseudogene 383 [Source:HGNC Symbol;Acc:HGNC:43283]	-	0	10	0	4.20001
ENSG00000260490	-6.2325	75.1914	0.00724341	0.422092	MYL12BP1	15	42571927	42572433	+	507	processed_pseudogene	myosin light chain 12B pseudogene 1 [Source:HGNC Symbol;Acc:HGNC:51649]	-	0	10	0	0.994085
ENSG00000228037	-6.2325	75.1914	0.00724341	0.422092	AL139246.3	1	2581560	2584533	+	626	lincRNA	uncharacterized LOC100996583 [Source:NCBI gene;Acc:100996583]	-	0	10	0	0.805114
ENSG00000281133	-6.2325	75.1914	0.00724341	0.422092	AL355480.3	1	45580892	45580996	-	96	pseudogene		-	0	10	0	5.25001
ENSG00000146722	-6.2325	75.1914	0.00724341	0.422092	AC211486.1	7	75391955	75395434	-	1122	transcribed_unprocessed_pseudogene	FK506 binding protein 6, 36kDa pseudogene [Source:NCBI gene;Acc:541473]	-	0	10	0	0.449199
ENSG00000270781	-6.2325	75.1914	0.00724341	0.422092	AC091133.5	17	48899131	48899748	+	301	processed_pseudogene	ribosomal protein L37 (RPL37) pseudogene	-	0	10	0	1.67442
ENSG00000263164	-6.2325	75.1914	0.00724341	0.422092	AC087500.2	17	5240508	5241543	-	498	lincRNA	novel transcript	-	0	10	0	1.01205
ENSG00000168263	-6.2325	75.1914	0.00724341	0.422092	KCNV2	9	2717502	2730037	+	2186	protein_coding	potassium voltage-gated channel modifier subfamily V member 2 [Source:HGNC Symbol;Acc:HGNC:19698]	-	0	10	0	0.230559
ENSG00000228816	-6.2325	75.1914	0.00724341	0.422092	AK3P5	10	32944481	32944999	+	519	processed_pseudogene	adenylate kinase 3 pseudogene 5 [Source:HGNC Symbol;Acc:HGNC:39064]	-	0	10	0	0.9711
ENSG00000266289	-6.2325	75.1914	0.00724341	0.422092	AC012213.3	8	103383078	103383854	-	777	lincRNA	novel transcript	-	0	10	0	0.64865
ENSG00000234319	-6.2325	75.1914	0.00724341	0.422092	RPS12P2	10	80215851	80216119	-	269	processed_pseudogene	ribosomal protein S12 pseudogene 2 [Source:HGNC Symbol;Acc:HGNC:24221]	-	0	10	0	1.87361
ENSG00000261268	-6.2325	75.1914	0.00724341	0.422092	AC112236.1	4	139618136	139623232	-	1098	lincRNA	novel transcript	-	0	10	0	0.459017
ENSG00000265724	-6.2325	75.1914	0.00724341	0.422092	MIR4284	7	73711317	73711397	+	81	miRNA	microRNA 4284 [Source:HGNC Symbol;Acc:HGNC:38322]	-	0	10	0	6.22224
ENSG00000254619	-6.2325	75.1914	0.00724341	0.422092	AC113192.1	11	33810145	33811178	+	321	lincRNA	novel transcript	-	0	10	0	1.5701
ENSG00000228404	-6.2325	75.1914	0.00724341	0.422092	AP001468.1	21	46185079	46188941	+	557	antisense	novel transcript	-	0	10	0	0.904849
ENSG00000257329	-6.2325	75.1914	0.00724341	0.422092	AC011611.2	12	75964440	75967062	+	358	lincRNA	novel transcript	-	0	10	0	1.40782
ENSG00000124839	-1.25916	2.39357	0.00736128	0.42789	RAB17	2	237574322	237601614	-	4783	protein_coding	RAB17, member RAS oncogene family [Source:HGNC Symbol;Acc:HGNC:16523]	-	61	171	0.753682	1.80189
ENSG00000143355	1.84827	3.60069	0.00758204	0.439626	LHX9	1	197911902	197935478	+	10442	protein_coding	LIM homeobox 9 [Source:HGNC Symbol;Acc:HGNC:14222]	Homeobox	28	9	0.158465	0.04344
ENSG00000250790	-2.70493	6.52028	0.00786477	0.441465	AC127070.2	12	132911470	132914732	+	3263	lincRNA	novel transcript	-	2	16	0.0362219	0.247135
ENSG00000264456	-2.70493	6.52028	0.00786477	0.441465	AC138207.4	17	30971652	30973312	+	1661	sense_intronic	novel transcript, sense intronic RNF135	-	2	16	0.0711572	0.485492
ENSG00000272948	2.95145	7.73528	0.00786477	0.441465	AP001412.1	21	37267784	37268497	+	714	antisense	novel transcript, antisense to DSCR3	-	14	2	1.15875	0.141177
ENSG00000135362	2.95145	7.73528	0.00786477	0.441465	PRR5L	11	36296288	36465204	+	6616	protein_coding	proline rich 5 like [Source:HGNC Symbol;Acc:HGNC:25878]	-	14	2	0.125052	0.0152358
ENSG00000279086	2.95145	7.73528	0.00786477	0.441465	AC073130.3	7	116209234	116211511	-	2278	TEC	TEC	-	14	2	0.363189	0.0442494
ENSG00000272625	-2.70493	6.52028	0.00786477	0.441465	AP000919.4	18	2920966	2921685	+	720	antisense	novel transcript, antisense to LPIN2	-	2	16	0.164156	1.12
ENSG00000227398	1.36423	2.57439	0.00792524	0.441465	KIF9-AS1	3	47164497	47246601	+	4898	antisense	KIF9 antisense RNA 1 [Source:HGNC Symbol;Acc:HGNC:26822]	-	75	34	0.904901	0.349858
ENSG00000264575	1.54122	2.91041	0.00792952	0.441465	LINC00526	18	5236724	5238598	-	1875	lincRNA	long intergenic non-protein coding RNA 526 [Source:HGNC Symbol;Acc:HGNC:28278]	-	45	18	1.41831	0.483841
ENSG00000279672	-1.69611	3.24026	0.00794554	0.441465	AP006621.5	11	779617	780755	+	1139	TEC	TEC	-	11	42	0.570726	1.85848
ENSG00000204876	-1.69611	3.24026	0.00794554	0.441465	AC021218.1	7	155962632	155966343	+	2536	lincRNA	uncharacterized LOC389602 [Source:NCBI gene;Acc:389602]	-	11	42	0.256332	0.834702
ENSG00000185065	1.92227	3.79018	0.00813533	0.441465	AC000068.1	22	19447893	19450105	+	2097	antisense	novel transcript, antisense to C22orf39	-	23	7	0.648169	0.168241
ENSG00000282936	1.92227	3.79018	0.00813533	0.441465	AC004706.3	17	6636780	6640316	-	3537	TEC	TEC	-	23	7	0.384283	0.0997458
ENSG00000177374	1.92227	3.79018	0.00813533	0.441465	HIC1	17	2054154	2063241	+	8108	protein_coding	HIC ZBTB transcriptional repressor 1 [Source:HGNC Symbol;Acc:HGNC:4909]	ZBTB	23	7	0.167638	0.0435127
ENSG00000117281	-2.18091	4.5344	0.00813533	0.441465	CD160	1	145719471	145739288	+	3971	protein_coding	CD160 molecule [Source:HGNC Symbol;Acc:HGNC:17013]	-	5	27	0.0744096	0.342685
ENSG00000198049	-2.18091	4.5344	0.00813533	0.441465	AVPR1B	1	206109692	206117699	-	2273	protein_coding	arginine vasopressin receptor 1B [Source:HGNC Symbol;Acc:HGNC:896]	-	5	27	0.129996	0.598681
ENSG00000246922	-1.41104	2.65928	0.00818219	0.441465	UBAP1L	15	65092770	65115197	-	8536	protein_coding	ubiquitin associated protein 1 like [Source:HGNC Symbol;Acc:HGNC:40028]	-	25	78	0.173079	0.460545
ENSG00000143502	3.51841	11.459	0.00839028	0.441465	SUSD4	1	223220819	223364202	-	4710	protein_coding	sushi domain containing 4 [Source:HGNC Symbol;Acc:HGNC:25470]	-	11	1	0.138016	0.0107007
ENSG00000280161	3.51841	11.459	0.00839028	0.441465	AC022413.1	5	180810401	180811384	+	984	TEC	TEC	-	11	1	0.660627	0.0512196
ENSG00000225756	-3.33163	10.0675	0.00839028	0.441465	DBH-AS1	9	133654586	133657313	-	2139	antisense	DBH antisense RNA 1 [Source:HGNC Symbol;Acc:HGNC:24155]	-	1	13	0.0276279	0.306312
ENSG00000266680	3.51841	11.459	0.00839028	0.441465	AL135905.1	6	63571005	63572408	-	1404	antisense	novel transcript, antisense to PTP4A1	-	11	1	0.463003	0.0358975
ENSG00000272173	-3.33163	10.0675	0.00839028	0.441465	U47924.2	12	6943508	6944604	-	1097	antisense	novel transcript, antisense to C12orf57	-	1	13	0.0538706	0.597267
ENSG00000176920	3.51841	11.459	0.00839028	0.441465	FUT2	19	48695971	48705950	+	3380	protein_coding	fucosyltransferase 2 [Source:HGNC Symbol;Acc:HGNC:4013]	-	11	1	0.192324	0.0149113
ENSG00000261693	-3.33163	10.0675	0.00839028	0.441465	AC134682.1	8	142403652	142407028	+	3377	antisense	novel transcript, antisense to TSNARE1	-	1	13	0.0174996	0.194019
ENSG00000233025	-3.33163	10.0675	0.00839028	0.441465	CRYZP1	7	103088664	103089610	-	947	processed_pseudogene	crystallin zeta pseudogene 1 [Source:HGNC Symbol;Acc:HGNC:2421]	-	1	13	0.0624035	0.691871
ENSG00000239377	-3.33163	10.0675	0.00839028	0.441465	AC073111.1	7	150379854	150383885	-	420	antisense	novel transcript	-	1	13	0.140705	1.56
ENSG00000212993	3.51841	11.459	0.00839028	0.441465	POU5F1B	8	127322183	127420066	+	4964	protein_coding	POU class 5 homeobox 1B [Source:HGNC Symbol;Acc:HGNC:9223]	Pou	11	1	0.130954	0.0101531
ENSG00000201772	3.51841	11.459	0.00839028	0.441465	SNORA5C	7	45104906	45105042	-	137	snoRNA	small nucleolar RNA, H/ACA box 5C [Source:HGNC Symbol;Acc:HGNC:32590]	-	11	1	4.74494	0.367884
ENSG00000210127	-3.33163	10.0675	0.00839028	0.441465	MT-TA	MT	5587	5655	-	69	Mt_tRNA	mitochondrially encoded tRNA alanine [Source:HGNC Symbol;Acc:HGNC:7475]	-	1	13	0.856465	9.49567
ENSG00000274929	-3.33163	10.0675	0.00839028	0.441465	AL157813.1	13	48532013	48532599	-	587	sense_intronic	novel transcript, sense intronic to RCBTB2	-	1	13	0.100675	1.11619
ENSG00000078579	-3.33163	10.0675	0.00839028	0.441465	FGF20	8	16992169	17002181	-	1688	protein_coding	fibroblast growth factor 20 [Source:HGNC Symbol;Acc:HGNC:3677]	-	1	13	0.0350095	0.388153
ENSG00000230732	-3.33163	10.0675	0.00839028	0.441465	AC016949.1	3	196912646	196914579	+	1413	sense_intronic	novel transcript	-	1	13	0.0418231	0.463695
ENSG00000212443	-3.33163	10.0675	0.00839028	0.441465	SNORA53	12	98599635	98599883	+	249	snoRNA	small nucleolar RNA, H/ACA box 53 [Source:HGNC Symbol;Acc:HGNC:32646]	-	1	13	0.237334	2.63133
ENSG00000182578	-3.33163	10.0675	0.00839028	0.441465	CSF1R	5	150053291	150113372	-	5151	protein_coding	colony stimulating factor 1 receptor [Source:HGNC Symbol;Acc:HGNC:2433]	-	1	13	0.0114727	0.127199
ENSG00000248514	-3.33163	10.0675	0.00839028	0.441465	AC008443.3	5	181205361	181206120	-	456	antisense	novel transcript	-	1	13	0.129597	1.43685
ENSG00000224855	-3.33163	10.0675	0.00839028	0.441465	OPA1-AS1	3	193618609	193627337	-	497	antisense	OPA1 antisense RNA 1 [Source:HGNC Symbol;Acc:HGNC:40421]	-	1	13	0.118906	1.31831
ENSG00000155269	-3.33163	10.0675	0.00839028	0.441465	GPR78	4	8558725	8619761	+	8362	protein_coding	G protein-coupled receptor 78 [Source:HGNC Symbol;Acc:HGNC:4528]	-	1	13	0.00706722	0.0783546
ENSG00000273001	-3.33163	10.0675	0.00839028	0.441465	AL731533.2	10	3065424	3066001	-	578	lincRNA	novel transcript	-	1	13	0.102242	1.13357
ENSG00000282572	-3.33163	10.0675	0.00839028	0.441465	AC215522.2	7	19018	35489	-	1556	processed_transcript	novel transcript similar to family member with sequence similarity 157	-	1	13	0.0379795	0.421081
ENSG00000215267	-3.33163	10.0675	0.00839028	0.441465	AKR1C7P	10	5275173	5288470	-	895	transcribed_unprocessed_pseudogene	aldo-keto reductase family 1 member C7, pseudogene [Source:HGNC Symbol;Acc:HGNC:44681]	-	1	13	0.0660291	0.732069
ENSG00000256799	-3.33163	10.0675	0.00839028	0.441465	AC005832.3	12	4635349	4636140	-	631	processed_pseudogene	RAB5A, member RAS oncogene family (RAB5A) pseudogene	-	1	13	0.0936546	1.03835
ENSG00000222000	3.51841	11.459	0.00839028	0.441465	AC092675.1	2	98331389	98356005	-	1164	antisense	uncharacterized LOC105373502 [Source:NCBI gene;Acc:105373502]	-	11	1	0.558468	0.0432991
ENSG00000213885	2.12271	4.35512	0.00845893	0.443077	RPL13AP7	21	25361821	25362431	+	611	processed_pseudogene	ribosomal protein L13a pseudogene 7 [Source:HGNC Symbol;Acc:HGNC:23755]	-	19	5	1.83768	0.41244
ENSG00000231728	2.12271	4.35512	0.00845893	0.443077	TMSB15B-AS1	X	103917411	103919548	-	1311	antisense	TMSB15B antisense RNA 1 [Source:HGNC Symbol;Acc:HGNC:53858]	-	19	5	0.856465	0.19222
ENSG00000250220	1.63265	3.10081	0.0087349	0.45501	AC053527.1	4	73259209	73317953	+	685	antisense	novel transcript	-	40	15	3.45087	1.10365
ENSG00000074317	1.63265	3.10081	0.0087349	0.45501	SNCB	5	176620084	176630556	-	2006	protein_coding	synuclein beta [Source:HGNC Symbol;Acc:HGNC:11140]	-	40	15	1.17839	0.37687
ENSG00000251595	-1.80006	3.48234	0.00876482	0.45501	ABCA11P	4	425435	474129	-	2790	transcribed_processed_pseudogene	ATP binding cassette subfamily A member 11, pseudogene [Source:HGNC Symbol;Acc:HGNC:31]	-	9	37	0.190632	0.668389
ENSG00000285752	-1.80006	3.48234	0.00876482	0.45501	AL031281.3	1	22028317	22052927	-	2574	lincRNA	novel transcript	-	9	37	0.20663	0.724477
ENSG00000269959	-2.0259	4.07246	0.00898543	0.456528	SPACA6P-AS	19	51685363	51693456	-	3962	lincRNA	SPACA6P antisense RNA [Source:HGNC Symbol;Acc:HGNC:49383]	-	6	29	0.0894943	0.368905
ENSG00000081248	1.85275	3.61188	0.00898543	0.456528	CACNA1S	1	201039512	201112566	-	6168	protein_coding	calcium voltage-gated channel subunit alpha1 S [Source:HGNC Symbol;Acc:HGNC:1397]	-	25	8	0.239527	0.0653698
ENSG00000198763	-1.0837	2.11946	0.00900566	0.456528	MT-ND2	MT	4470	5511	+	1042	protein_coding	mitochondrially encoded NADH:ubiquinone oxidoreductase core subunit 2 [Source:HGNC Symbol;Acc:HGNC:7456]	-	31406	77872	1781.16	3766.56
ENSG00000162520	1.21524	2.3218	0.00901308	0.456528	SYNC	1	32680360	32703596	-	3487	protein_coding	syncoilin, intermediate filament protein [Source:HGNC Symbol;Acc:HGNC:28897]	-	149	75	2.52518	1.08403
ENSG00000156453	1.61053	3.05365	0.00908383	0.456528	PCDH1	5	141853111	141879246	-	5903	protein_coding	protocadherin 1 [Source:HGNC Symbol;Acc:HGNC:8655]	-	42	16	0.42047	0.136609
ENSG00000213928	-1.54346	2.91493	0.00908383	0.456528	IRF9	14	24161053	24166565	+	3794	protein_coding	interferon regulatory factor 9 [Source:HGNC Symbol;Acc:HGNC:6131]	IRF	14	48	0.218067	0.63764
ENSG00000175906	1.23529	2.35429	0.0091415	0.456528	ARL4D	17	43398959	43401137	+	1612	protein_coding	ADP ribosylation factor like GTPase 4D [Source:HGNC Symbol;Acc:HGNC:656]	-	137	68	5.02243	2.12606
ENSG00000206120	-1.72556	3.30708	0.00927012	0.456528	EGFEM1P	3	168249522	168830599	+	4658	transcribed_unitary_pseudogene	EGF like and EMI domain containing 1, pseudogene [Source:HGNC Symbol;Acc:HGNC:25149]	-	10	39	0.12687	0.421985
ENSG00000156239	-1.11393	2.16435	0.00927232	0.456528	N6AMT1	21	28872191	28885371	-	4865	protein_coding	N-6 adenine-specific DNA methyltransferase 1 [Source:HGNC Symbol;Acc:HGNC:16021]	-	276	699	3.35262	7.24145
ENSG00000276449	-1.53194	2.89174	0.009406	0.456528	AC004076.2	19	57449689	57453011	+	3323	antisense	novel transcript	-	15	51	0.266759	0.77352
ENSG00000150456	-1.20127	2.29943	0.00946832	0.456528	EEF1AKMT1	13	20728731	20773958	-	1339	protein_coding	EEF1A lysine methyltransferase 1 [Source:HGNC Symbol;Acc:HGNC:27351]	-	78	210	3.44249	7.90442
ENSG00000107518	-1.46878	2.76787	0.00948574	0.456528	ATRNL1	10	115093365	115948992	+	9950	protein_coding	attractin like 1 [Source:HGNC Symbol;Acc:HGNC:29063]	-	20	65	0.118786	0.329247
ENSG00000116741	-1.0789	2.11242	0.00955156	0.456528	RGS2	1	192809039	192812283	+	2096	protein_coding	regulator of G protein signaling 2 [Source:HGNC Symbol;Acc:HGNC:9998]	-	2304	5694	64.9606	136.917
ENSG00000277287	-1.66146	3.16336	0.00972615	0.456528	AL109976.1	20	3239705	3245382	+	5678	lincRNA	novel transcript	-	11	41	0.114487	0.363932
ENSG00000271161	-1.90318	3.74037	0.00973082	0.456528	BOLA2P2	3	47499841	47500407	+	567	transcribed_processed_pseudogene	bolA family member 2 pseudogene 2 [Source:HGNC Symbol;Acc:HGNC:51438]	-	7	31	0.729581	2.75556
ENSG00000171951	-2.32571	5.01312	0.00973269	0.456528	SCG2	2	223596940	223602503	-	2719	protein_coding	secretogranin II [Source:HGNC Symbol;Acc:HGNC:10575]	-	4	24	0.0869379	0.44487
ENSG00000122367	2.00956	4.0266	0.00973269	0.456528	LDB3	10	86668449	86736068	+	6676	protein_coding	LIM domain binding 3 [Source:HGNC Symbol;Acc:HGNC:15710]	-	21	6	0.185892	0.0452967
ENSG00000249855	-2.32571	5.01312	0.00973269	0.456528	EEF1A1P19	5	43495073	43496454	-	1382	processed_pseudogene	eukaryotic translation elongation factor 1 alpha 1 pseudogene 19 [Source:HGNC Symbol;Acc:HGNC:37892]	-	4	24	0.171045	0.875255
ENSG00000101638	-2.32571	5.01312	0.00973269	0.456528	ST8SIA5	18	46667821	46759257	-	15789	protein_coding	ST8 alpha-N-acetyl-neuraminide alpha-2,8-sialyltransferase 5 [Source:HGNC Symbol;Acc:HGNC:17827]	-	4	24	0.0149715	0.0766105
ENSG00000185689	-2.32571	5.01312	0.00973269	0.456528	C6orf201	6	4079206	4130951	+	3322	protein_coding	chromosome 6 open reading frame 201 [Source:HGNC Symbol;Acc:HGNC:21620]	-	4	24	0.0711572	0.364119
ENSG00000198727	-1.07215	2.10256	0.00975648	0.456528	MT-CYB	MT	14747	15887	+	1141	protein_coding	mitochondrially encoded cytochrome b [Source:HGNC Symbol;Acc:HGNC:7427]	-	22677	55780	1174.51	2463.91
ENSG00000236438	-1.28749	2.44102	0.00987434	0.456528	FAM157A	3	198153287	198222513	+	7091	transcribed_unprocessed_pseudogene	family with sequence similarity 157 member A [Source:HGNC Symbol;Acc:HGNC:34079]	-	36	103	0.300022	0.732085
ENSG00000186567	-1.41801	2.67216	0.00988923	0.456528	CEACAM19	19	44662278	44684359	+	5203	protein_coding	carcinoembryonic antigen related cell adhesion molecule 19 [Source:HGNC Symbol;Acc:HGNC:31951]	-	22	69	0.249878	0.668385
ENSG00000224738	1.40392	2.6462	0.00988923	0.456528	AC099850.1	17	59106598	59118267	+	1338	antisense	novel transcript	-	59	26	2.60588	0.979374
ENSG00000151882	-1.20767	2.30965	0.00992735	0.456528	CCL28	5	43376645	43412391	-	4524	protein_coding	C-C motif chemokine ligand 28 [Source:HGNC Symbol;Acc:HGNC:17700]	-	61	165	0.79683	1.8382
ENSG00000162676	-2.31499	4.97601	0.0100337	0.456528	GFI1	1	92474762	92486876	-	3301	protein_coding	growth factor independent 1 transcriptional repressor [Source:HGNC Symbol;Acc:HGNC:4237]	zf-C2H2	3	18	0.0537074	0.274826
ENSG00000163635	-2.31499	4.97601	0.0100337	0.456528	ATXN7	3	63898399	64003453	+	9183	protein_coding	ataxin 7 [Source:HGNC Symbol;Acc:HGNC:10560]	-	3	18	0.0193061	0.0987915
ENSG00000256092	2.58835	6.01411	0.0100337	0.456528	AC137767.1	12	123363868	123366113	+	2246	lincRNA	novel transcript	-	16	3	0.420987	0.0673198
ENSG00000196119	-2.31499	4.97601	0.0100337	0.456528	OR8A1	11	124566660	124582942	+	6088	protein_coding	olfactory receptor family 8 subfamily A member 1 [Source:HGNC Symbol;Acc:HGNC:8469]	-	3	18	0.0291209	0.149015
ENSG00000254604	2.58835	6.01411	0.0100337	0.456528	AP002336.2	11	70282367	70363368	-	539	antisense	novel transcript	-	16	3	1.75424	0.28052
ENSG00000184261	2.58835	6.01411	0.0100337	0.456528	KCNK12	2	47516581	47570939	-	6685	protein_coding	potassium two pore domain channel subfamily K member 12 [Source:HGNC Symbol;Acc:HGNC:6274]	-	16	3	0.141442	0.0226179
ENSG00000227877	-2.31499	4.97601	0.0100337	0.456528	MRLN	10	59736692	59756041	-	2941	protein_coding	myoregulin [Source:HGNC Symbol;Acc:HGNC:48649]	-	3	18	0.0602816	0.308467
ENSG00000261212	-2.31499	4.97601	0.0100337	0.456528	AC234778.2	X	141173235	141173588	-	354	lincRNA	novel transcript	-	3	18	0.500814	2.56272
ENSG00000165168	2.58835	6.01411	0.0100337	0.456528	CYBB	X	37780011	37813461	+	4423	protein_coding	cytochrome b-245 beta chain [Source:HGNC Symbol;Acc:HGNC:2578]	-	16	3	0.213777	0.034185
ENSG00000197124	-1.27803	2.42507	0.0100886	0.456528	ZNF682	19	19997058	20039506	-	4968	protein_coding	zinc finger protein 682 [Source:HGNC Symbol;Acc:HGNC:28857]	zf-C2H2	38	108	0.452023	1.09565
ENSG00000005187	-1.33913	2.52999	0.0101305	0.456528	ACSM3	16	20610243	20797581	+	7822	protein_coding	acyl-CoA synthetase medium chain family member 3 [Source:HGNC Symbol;Acc:HGNC:10522]	-	30	89	0.226653	0.573461
ENSG00000128886	-1.37425	2.59233	0.0102488	0.456528	ELL3	15	43772600	43777543	-	2880	protein_coding	elongation factor for RNA polymerase II 3 [Source:HGNC Symbol;Acc:HGNC:23113]	-	24	73	0.492467	1.2775
ENSG00000258645	-1.80328	3.49013	0.0103844	0.456528	HSPE1P2	14	63601509	63601814	+	306	processed_pseudogene	heat shock protein family E (Hsp10) member 1 pseudogene 2 [Source:HGNC Symbol;Acc:HGNC:20052]	-	8	33	1.545	5.43531
ENSG00000198939	-1.80328	3.49013	0.0103844	0.456528	ZFP2	5	178895894	178933212	+	2641	protein_coding	ZFP2 zinc finger protein [Source:HGNC Symbol;Acc:HGNC:26138]	zf-C2H2	8	33	0.179011	0.629763
ENSG00000213930	-1.18292	2.27036	0.0104716	0.456528	GALT	9	34638133	34651035	+	4407	protein_coding	galactose-1-phosphate uridylyltransferase [Source:HGNC Symbol;Acc:HGNC:4135]	-	79	210	1.05936	2.40164
ENSG00000285693	1.4338	2.70158	0.0104737	0.456528	AP002381.2	11	72793624	72814054	-	1299	lincRNA	Novel transcript	-	51	22	2.32017	0.853582
ENSG00000232442	-1.16569	2.24341	0.0105601	0.456528	MHENCR	20	63627227	63628824	+	801	antisense	melanoma highly expressed competing endogenous lncRNA for miR-425 and miR-489 [Source:HGNC Symbol;Acc:HGNC:53110]	-	91	239	6.71379	15.0382
ENSG00000262814	1.09038	2.1293	0.0107964	0.456528	MRPL12	17	81703357	81707526	+	1028	protein_coding	mitochondrial ribosomal protein L12 [Source:HGNC Symbol;Acc:HGNC:10378]	-	568	312	32.6523	15.2965
ENSG00000158164	-2.12674	4.36729	0.0108117	0.456528	TMSB15A	X	102513676	102516784	-	685	protein_coding	thymosin beta 15a [Source:HGNC Symbol;Acc:HGNC:30744]	-	5	26	0.431358	1.913
ENSG00000179909	-2.12674	4.36729	0.0108117	0.456528	ZNF154	19	57697367	57709194	-	5713	protein_coding	zinc finger protein 154 [Source:HGNC Symbol;Acc:HGNC:12939]	zf-C2H2	5	26	0.0517207	0.229372
ENSG00000149571	-2.12674	4.36729	0.0108117	0.456528	KIRREL3	11	126423359	127003460	-	6594	protein_coding	kirre like nephrin family adhesion molecule 3 [Source:HGNC Symbol;Acc:HGNC:23204]	-	5	26	0.0448105	0.198727
ENSG00000212127	-1.51318	2.85438	0.0108508	0.456528	TAS2R14	12	10937406	11171573	-	2350	protein_coding	taste 2 receptor member 14 [Source:HGNC Symbol;Acc:HGNC:14920]	-	14	47	0.352062	1.008
ENSG00000220201	-1.51318	2.85438	0.0108508	0.456528	ZGLP1	19	10304803	10309880	-	2431	protein_coding	zinc finger, GATA-like protein 1 [Source:HGNC Symbol;Acc:HGNC:37245]	zf-GATA	14	47	0.340331	0.974416
ENSG00000285979	-1.42378	2.68288	0.0109014	0.456528	AC009090.6	16	57177349	57181390	+	3524	antisense	novel transcript, antisense to FAM192A	-	20	63	0.335392	0.901024
ENSG00000203722	1.70891	3.26914	0.0109584	0.456528	RAET1G	6	149916878	149923121	-	1486	protein_coding	retinoic acid early transcript 1G [Source:HGNC Symbol;Acc:HGNC:16795]	-	31	11	1.23283	0.373083
ENSG00000228594	1.1513	2.22113	0.0112292	0.456528	FNDC10	1	1598012	1600096	-	2085	protein_coding	fibronectin type III domain containing 10 [Source:HGNC Symbol;Acc:HGNC:42951]	-	190	100	5.38525	2.41727
ENSG00000196172	-1.11539	2.16653	0.0113987	0.456528	ZNF681	19	23739195	23758891	-	6497	protein_coding	zinc finger protein 681 [Source:HGNC Symbol;Acc:HGNC:26457]	zf-C2H2	140	355	1.27343	2.75389
ENSG00000095752	1.29733	2.45774	0.0114689	0.456528	IL11	19	55364389	55370463	-	2671	protein_coding	interleukin 11 [Source:HGNC Symbol;Acc:HGNC:5966]	-	80	38	1.77001	0.717036
ENSG00000209082	-1.06827	2.09691	0.0114858	0.456528	MT-TL1	MT	3230	3304	+	75	Mt_tRNA	mitochondrially encoded tRNA leucine 1 (UUA/G) [Source:HGNC Symbol;Acc:HGNC:7490]	-	430	1055	338.817	708.962
ENSG00000226221	-1.16057	2.23546	0.0115965	0.456528	RPL26P19	5	56504635	56505072	-	438	processed_pseudogene	ribosomal protein L26 pseudogene 19 [Source:HGNC Symbol;Acc:HGNC:36393]	-	81	212	10.9287	24.3946
ENSG00000158813	1.79413	3.46807	0.0117239	0.456528	EDA	X	69616067	70039469	+	6999	protein_coding	ectodysplasin A [Source:HGNC Symbol;Acc:HGNC:3157]	-	24	8	0.202644	0.0576084
ENSG00000164362	-1.97551	3.93268	0.0117239	0.456528	TERT	5	1253147	1295069	-	4602	protein_coding	telomerase reverse transcriptase [Source:HGNC Symbol;Acc:HGNC:11730]	-	6	28	0.0770483	0.30665
ENSG00000149970	1.36429	2.5745	0.0117497	0.456528	CNKSR2	X	21372801	21654695	+	31865	protein_coding	connector enhancer of kinase suppressor of Ras 2 [Source:HGNC Symbol;Acc:HGNC:19701]	-	64	29	0.118693	0.0458686
ENSG00000196358	1.3156	2.48906	0.0117497	0.456528	NTNG2	9	132161676	132244534	+	7845	protein_coding	netrin G2 [Source:HGNC Symbol;Acc:HGNC:14288]	-	64	30	0.482109	0.192735
ENSG00000109339	-2.06428	4.18227	0.011803	0.456528	MAPK10	4	85990007	86594625	-	42646	protein_coding	mitogen-activated protein kinase 10 [Source:HGNC Symbol;Acc:HGNC:6872]	-	4	20	0.00554294	0.0236365
ENSG00000129535	2.04519	4.12728	0.011803	0.456528	NRL	14	24080107	24115014	-	3113	protein_coding	neural retina leucine zipper [Source:HGNC Symbol;Acc:HGNC:8002]	TF_bZIP	18	5	0.341706	0.080951
ENSG00000185149	2.04519	4.12728	0.011803	0.456528	NPY2R	4	155208629	155217078	+	3628	protein_coding	neuropeptide Y receptor Y2 [Source:HGNC Symbol;Acc:HGNC:7957]	-	18	5	0.2932	0.0694599
ENSG00000256576	2.35768	5.12547	0.011803	0.456528	LINC02361	12	132186735	132189695	-	1484	lincRNA	long intergenic non-protein coding RNA 2361 [Source:HGNC Symbol;Acc:HGNC:53283]	-	18	4	0.716799	0.135849
ENSG00000259577	-2.06428	4.18227	0.011803	0.456528	CERNA1	15	52180093	52205874	+	2096	lincRNA	competing endogenous lncRNA 1 for miR-4707-5p and miR-4767 [Source:HGNC Symbol;Acc:HGNC:52664]	-	4	20	0.112779	0.480917
ENSG00000183154	2.04519	4.12728	0.011803	0.456528	AC138356.1	8	37734761	37737426	-	2086	antisense	uncharacterized LOC102723701 [Source:NCBI gene;Acc:102723701]	-	18	5	0.509937	0.120806
ENSG00000237232	2.04519	4.12728	0.011803	0.456528	ZNF295-AS1	21	42009194	42024924	+	1363	lincRNA	ZNF295 antisense RNA 1 [Source:HGNC Symbol;Acc:HGNC:23130]	-	18	5	0.780432	0.184887
ENSG00000198886	-1.04377	2.06161	0.0118034	0.456528	MT-ND4	MT	10760	12137	+	1378	protein_coding	mitochondrially encoded NADH:ubiquinone oxidoreductase core subunit 4 [Source:HGNC Symbol;Acc:HGNC:7459]	-	61144	147470	2622.18	5393.69
ENSG00000120738	-2.61263	6.11616	0.0118324	0.456528	EGR1	5	138465490	138469315	+	3138	protein_coding	early growth response 1 [Source:HGNC Symbol;Acc:HGNC:3238]	zf-C2H2	2	15	0.0376648	0.240918
ENSG00000154269	2.84544	7.18727	0.0118324	0.456528	ENPP3	6	131628442	131747418	+	3885	protein_coding	ectonucleotide pyrophosphatase/phosphodiesterase 3 [Source:HGNC Symbol;Acc:HGNC:3358]	-	13	2	0.197747	0.025946
ENSG00000230154	-2.61263	6.11616	0.0118324	0.456528	AC018463.1	2	11308025	11308941	+	917	processed_pseudogene	chromosome 1 open reading frame 80 (C1orf80) pseudogene	-	2	15	0.12889	0.824429
ENSG00000204052	2.84544	7.18727	0.0118324	0.456528	LRRC73	6	43506969	43510686	-	2121	protein_coding	leucine rich repeat containing 73 [Source:HGNC Symbol;Acc:HGNC:21375]	-	13	2	0.362211	0.0475249
ENSG00000245552	2.84544	7.18727	0.0118324	0.456528	AP000787.1	11	95150539	95234104	+	5320	antisense	uncharacterized LOC101929295 [Source:NCBI gene;Acc:101929295]	-	13	2	0.144408	0.0189474
ENSG00000205277	-2.61263	6.11616	0.0118324	0.456528	MUC12	7	100969623	101018949	+	17130	protein_coding	mucin 12, cell surface associated [Source:HGNC Symbol;Acc:HGNC:7510]	-	2	15	0.00689972	0.0441332
ENSG00000254910	2.84544	7.18727	0.0118324	0.456528	AC136475.2	11	310139	311141	-	392	antisense	novel transcript	-	13	2	1.95982	0.257143
ENSG00000137101	2.84544	7.18727	0.0118324	0.456528	CD72	9	35609533	35646810	-	3386	protein_coding	CD72 molecule [Source:HGNC Symbol;Acc:HGNC:1696]	-	13	2	0.22689	0.0297697
ENSG00000271551	-2.61263	6.11616	0.0118324	0.456528	AL355297.4	6	156776360	156778422	-	1249	antisense	novel transcript, antisense to ARID1B	-	2	15	0.0946294	0.605286
ENSG00000219410	-2.61263	6.11616	0.0118324	0.456528	AC125494.1	12	6663260	6672069	+	2399	bidirectional_promoter_lncRNA	novel transcript	-	2	15	0.0492673	0.315132
ENSG00000200714	-2.61263	6.11616	0.0118324	0.456528	RF00019	8	65592731	65592820	+	90	misc_RNA		-	2	15	1.31325	8.40002
ENSG00000272100	-2.61263	6.11616	0.0118324	0.456528	AL513218.1	1	52353487	52353877	+	391	antisense	novel transcript, antisense to CC2D1B	-	2	15	0.302282	1.93351
ENSG00000226919	-2.61263	6.11616	0.0118324	0.456528	AL365184.1	1	240763382	240776044	+	1725	antisense	novel transcript	-	2	15	0.0685172	0.438262
ENSG00000169933	2.84544	7.18727	0.0118324	0.456528	FRMPD4	X	12138466	12724523	+	8478	protein_coding	FERM and PDZ domain containing 4 [Source:HGNC Symbol;Acc:HGNC:29007]	-	13	2	0.0906168	0.0118896
ENSG00000197928	-1.08141	2.1161	0.0118723	0.456528	ZNF677	19	53235381	53254898	-	9348	protein_coding	zinc finger protein 677 [Source:HGNC Symbol;Acc:HGNC:28730]	zf-C2H2	252	624	1.59309	3.36432
ENSG00000131730	1.31282	2.48427	0.0118895	0.456528	CKMT2	5	81233285	81266397	+	2736	protein_coding	creatine kinase, mitochondrial 2 [Source:HGNC Symbol;Acc:HGNC:1996]	-	66	31	1.42556	0.571054
ENSG00000251281	-1.3173	2.49199	0.0118895	0.456528	AC034223.2	5	33011322	33017607	-	425	lincRNA	novel transcript	-	26	76	3.61529	9.01273
ENSG00000270871	-1.62595	3.08646	0.0119088	0.456528	AC015849.3	17	35816717	35830293	-	488	antisense	novel transcript, antisense TAF15	-	11	40	1.33208	4.13116
ENSG00000269609	-1.14039	2.20441	0.0120427	0.456528	RPARP-AS1	10	102449817	102461106	+	5660	processed_transcript	RPARP antisense RNA 1 [Source:HGNC Symbol;Acc:HGNC:45238]	-	93	240	0.971013	2.13711
ENSG00000157227	1.04195	2.05901	0.0122437	0.456528	MMP14	14	22836557	22849027	+	4464	protein_coding	matrix metallopeptidase 14 [Source:HGNC Symbol;Acc:HGNC:7160]	-	4768	2709	63.1205	30.5856
ENSG00000198695	-1.03906	2.05489	0.0122901	0.456528	MT-ND6	MT	14149	14673	-	525	protein_coding	mitochondrially encoded NADH:ubiquinone oxidoreductase core subunit 6 [Source:HGNC Symbol;Acc:HGNC:7462]	-	6240	15001	702.399	1440.1
ENSG00000225872	-1.57183	2.97281	0.0123028	0.456528	LINC01529	19	35785697	35797902	-	4415	transcribed_unprocessed_pseudogene	long intergenic non-protein coding RNA 1529 [Source:HGNC Symbol;Acc:HGNC:51268]	-	12	42	0.160624	0.479457
ENSG00000162723	-1.57183	2.97281	0.0123028	0.456528	SLAMF9	1	159951492	159954254	-	1156	protein_coding	SLAM family member 9 [Source:HGNC Symbol;Acc:HGNC:18430]	-	12	42	0.613454	1.83115
ENSG00000187601	-1.30639	2.47322	0.0124778	0.456528	MAGEH1	X	55452105	55453566	+	1462	protein_coding	MAGE family member H1 [Source:HGNC Symbol;Acc:HGNC:24092]	-	30	87	1.21264	2.99919
ENSG00000232124	-1.85608	3.62024	0.0124954	0.456528	AP001057.1	21	44200616	44207399	-	2100	processed_transcript	novel transcript	-	7	30	0.196987	0.720002
ENSG00000224183	-1.40075	2.64038	0.0125289	0.456528	SDHDP6	1	25294164	25294643	-	480	processed_pseudogene	succinate dehydrogenase complex subunit D pseudogene 6 [Source:HGNC Symbol;Acc:HGNC:10689]	-	20	62	2.46234	6.51001
ENSG00000205560	1.55886	2.94622	0.0126523	0.456528	CPT1B	22	50568861	50578465	-	4102	protein_coding	carnitine palmitoyltransferase 1B [Source:HGNC Symbol;Acc:HGNC:2329]	-	38	15	0.547453	0.184301
ENSG00000261324	-1.39878	2.63678	0.0126975	0.456528	AC010168.2	12	14762504	14767931	-	5428	sense_overlapping	novel transcript, overlapping HIST4H4	-	21	65	0.228633	0.603539
ENSG00000078900	-5.91536	60.3531	0.0127308	0.456528	TP73	1	3652520	3736201	+	6763	protein_coding	tumor protein p73 [Source:HGNC Symbol;Acc:HGNC:12003]	P53	0	8	0	0.0596186
ENSG00000173702	-6.08262	67.7723	0.0127308	0.456528	MUC13	3	124905442	124953819	-	3499	protein_coding	mucin 13, cell surface associated [Source:HGNC Symbol;Acc:HGNC:7511]	-	0	9	0	0.129637
ENSG00000274276	-5.91536	60.3531	0.0127308	0.456528	CBSL	21	6444869	6468040	-	4004	protein_coding	cystathionine-beta-synthase like [Source:HGNC Symbol;Acc:HGNC:51829]	-	0	8	0	0.1007
ENSG00000154864	6.13825	70.4363	0.0127308	0.456528	PIEZO2	18	10666483	11148762	-	14796	protein_coding	piezo type mechanosensitive ion channel component 2 [Source:HGNC Symbol;Acc:HGNC:26270]	-	8	0	0.0319525	0
ENSG00000233593	6.13825	70.4363	0.0127308	0.456528	AL590094.1	1	90782983	90851657	-	4212	processed_transcript	uncharacterized LOC105378853 [Source:NCBI gene;Acc:105378853]	-	8	0	0.112243	0
ENSG00000197588	-5.91536	60.3531	0.0127308	0.456528	KLKP1	19	50882096	50896398	-	1912	transcribed_unprocessed_pseudogene	kallikrein pseudogene 1 [Source:HGNC Symbol;Acc:HGNC:21260]	-	0	8	0	0.210879
ENSG00000176406	-5.91536	60.3531	0.0127308	0.456528	RIMS2	8	103500748	104256094	+	13619	protein_coding	regulating synaptic membrane exocytosis 2 [Source:HGNC Symbol;Acc:HGNC:17283]	-	0	8	0	0.0296058
ENSG00000250420	-5.91536	60.3531	0.0127308	0.456528	AACSP1	5	178764861	178818435	-	3380	transcribed_unprocessed_pseudogene	acetoacetyl-CoA synthetase pseudogene 1 [Source:HGNC Symbol;Acc:HGNC:18226]	-	0	8	0	0.11929
ENSG00000153976	6.13825	70.4363	0.0127308	0.456528	HS3ST3A1	17	13495689	13601927	-	2628	protein_coding	heparan sulfate-glucosamine 3-sulfotransferase 3A1 [Source:HGNC Symbol;Acc:HGNC:5196]	-	8	0	0.179897	0
ENSG00000253978	-6.08262	67.7723	0.0127308	0.456528	CTB-178M22.2	5	168229583	168232357	-	503	antisense	uncharacterized LOC101927862 [Source:NCBI gene;Acc:101927862]	-	0	9	0	0.901791
ENSG00000285667	-5.91536	60.3531	0.0127308	0.456528	AC012291.2	15	84717474	84746837	-	1711	lincRNA	novel transcript	-	0	8	0	0.235652
ENSG00000259775	-5.91536	60.3531	0.0127308	0.456528	AL138976.2	14	103331674	103332367	-	694	antisense	novel transcript, antisense to EIF5	-	0	8	0	0.580981
ENSG00000169418	6.13825	70.4363	0.0127308	0.456528	NPR1	1	153678637	153693992	+	5003	protein_coding	natriuretic peptide receptor 1 [Source:HGNC Symbol;Acc:HGNC:7943]	-	8	0	0.094497	0
ENSG00000270038	6.13825	70.4363	0.0127308	0.456528	AL133467.4	14	95644508	95645232	+	725	lincRNA	novel transcript	-	8	0	0.652095	0
ENSG00000181378	-5.91536	60.3531	0.0127308	0.456528	CFAP65	2	219002846	219041527	-	10519	protein_coding	cilia and flagella associated protein 65 [Source:HGNC Symbol;Acc:HGNC:25325]	-	0	8	0	0.0383307
ENSG00000181626	-6.08262	67.7723	0.0127308	0.456528	ANKRD62	18	12093853	12129749	+	4812	protein_coding	ankyrin repeat domain 62 [Source:HGNC Symbol;Acc:HGNC:35241]	-	0	9	0	0.0942645
ENSG00000269793	-6.08262	67.7723	0.0127308	0.456528	ZIM2-AS1	19	56765344	56799646	+	2129	antisense	ZIM2 antisense RNA 1 [Source:HGNC Symbol;Acc:HGNC:51304]	-	0	9	0	0.213058
ENSG00000273492	-6.08262	67.7723	0.0127308	0.456528	AP000229.1	21	26170871	26217381	+	2044	lincRNA	novel transcript	-	0	9	0	0.221918
ENSG00000233588	-5.91536	60.3531	0.0127308	0.456528	CYP51A1P2	13	28722386	28724021	-	1499	processed_pseudogene	cytochrome P450 family 51 subfamily A member 1 pseudogene 2 [Source:HGNC Symbol;Acc:HGNC:20251]	-	0	8	0	0.26898
ENSG00000269425	6.13825	70.4363	0.0127308	0.456528	AC104521.1	19	4339577	4343491	+	279	antisense	novel transcript, antisense to STAP2	-	8	0	1.69451	0
ENSG00000134538	-6.08262	67.7723	0.0127308	0.456528	SLCO1B1	12	21131202	21239246	+	2229	protein_coding	solute carrier organic anion transporter family member 1B1 [Source:HGNC Symbol;Acc:HGNC:10959]	-	0	9	0	0.2035
ENSG00000251520	6.13825	70.4363	0.0127308	0.456528	AL162431.3	1	180964511	180965909	+	537	unprocessed_pseudogene	pseudogene similar to part of major histocompatibility complex, class I-related MR1	-	8	0	0.880388	0
ENSG00000230530	-5.91536	60.3531	0.0127308	0.456528	LIMD1-AS1	3	45679043	45689134	-	1651	bidirectional_promoter_lncRNA	LIMD1 antisense RNA 1 [Source:HGNC Symbol;Acc:HGNC:44107]	-	0	8	0	0.244216
ENSG00000276903	-5.91536	60.3531	0.0127308	0.456528	HIST1H2AL	6	27865355	27865747	+	393	protein_coding	histone cluster 1 H2A family member l [Source:HGNC Symbol;Acc:HGNC:4730]	-	0	8	0	1.02596
ENSG00000176945	-5.91536	60.3531	0.0127308	0.456528	MUC20	3	195720882	195741123	+	4249	protein_coding	mucin 20, cell surface associated [Source:HGNC Symbol;Acc:HGNC:23282]	-	0	8	0	0.0948931
ENSG00000270482	-5.91536	60.3531	0.0127308	0.456528	AC026367.1	12	118375350	118376275	-	611	lincRNA	novel transcript	-	0	8	0	0.659903
ENSG00000235454	-6.08262	67.7723	0.0127308	0.456528	HAUS6P3	7	53862233	53863339	+	1107	processed_pseudogene	HAUS augmin like complex subunit 6 pseudogene 3 [Source:HGNC Symbol;Acc:HGNC:50772]	-	0	9	0	0.409757
ENSG00000156427	-5.91536	60.3531	0.0127308	0.456528	FGF18	5	171419656	171457623	+	1986	protein_coding	fibroblast growth factor 18 [Source:HGNC Symbol;Acc:HGNC:3674]	-	0	8	0	0.203022
ENSG00000223711	-6.08262	67.7723	0.0127308	0.456528	AC069213.1	3	195544048	195550581	+	1041	antisense	novel transcript	-	0	9	0	0.435736
ENSG00000112280	-5.91536	60.3531	0.0127308	0.456528	COL9A1	6	70215061	70303083	-	7240	protein_coding	collagen type IX alpha 1 chain [Source:HGNC Symbol;Acc:HGNC:2217]	-	0	8	0	0.0556907
ENSG00000179066	6.13825	70.4363	0.0127308	0.456528	AC020907.1	19	35090930	35113664	+	3099	lincRNA	novel transcript	-	8	0	0.152555	0
ENSG00000226650	-6.08262	67.7723	0.0127308	0.456528	KIF4B	5	155013755	155018132	+	4378	protein_coding	kinesin family member 4B [Source:HGNC Symbol;Acc:HGNC:6322]	-	0	9	0	0.103609
ENSG00000228955	6.13825	70.4363	0.0127308	0.456528	AL591623.2	1	246632251	246632478	-	222	processed_pseudogene	ribosomal protein L7a (RPL7A) pseudogene	-	8	0	2.12959	0
ENSG00000243107	-5.91536	60.3531	0.0127308	0.456528	AC000120.1	7	92200014	92206857	-	1589	sense_overlapping	novel transcript	-	0	8	0	0.253745
ENSG00000276071	-6.08262	67.7723	0.0127308	0.456528	AC074138.1	19	36668102	36669404	+	1303	lincRNA	novel transcript	-	0	9	0	0.34812
ENSG00000280198	-5.91536	60.3531	0.0127308	0.456528	AC087163.3	17	18026072	18026771	-	700	TEC	novel transcript	-	0	8	0	0.576001
ENSG00000240695	-6.08262	67.7723	0.0127308	0.456528	AC117382.1	3	136736500	136737229	-	730	processed_pseudogene	DnaJ (Hsp40) homolog, subfamily C, member 8 (DNAJC8) pseudogene	-	0	9	0	0.621371
ENSG00000279373	-5.91536	60.3531	0.0127308	0.456528	AC027228.3	15	78537681	78538946	+	1266	TEC	novel transcript	-	0	8	0	0.318484
ENSG00000227370	6.13825	70.4363	0.0127308	0.456528	AC254562.1	22	42132543	42132998	+	456	processed_pseudogene	chromosome 6 open reading frame 108 (C6orf108) pseudogene	-	8	0	1.03677	0
ENSG00000285897	-6.08262	67.7723	0.0127308	0.456528	AC004687.2	17	58345206	58417595	-	5828	protein_coding	novel transcript	-	0	9	0	0.0778313
ENSG00000236942	-5.91536	60.3531	0.0127308	0.456528	AC096533.1	1	205625483	205626153	+	353	processed_pseudogene	GABA(A) receptor-associated protein (GABARAP) pseudogene	-	0	8	0	1.14221
ENSG00000239254	6.13825	70.4363	0.0127308	0.456528	AC009220.2	7	139172516	139174266	-	1751	processed_pseudogene	Male-specific lethal-3 homolog 1 (Msl3l1) pseudogene	-	8	0	0.269999	0
ENSG00000230216	6.13825	70.4363	0.0127308	0.456528	HSPB1P2	X	49233956	49234501	-	546	processed_pseudogene	heat shock protein family B (small) member 1 pseudogene 2 [Source:HGNC Symbol;Acc:HGNC:5252]	-	8	0	0.865876	0
ENSG00000278206	6.13825	70.4363	0.0127308	0.456528	AL031320.2	6	143484979	143507327	+	2079	processed_transcript	novel transcript	-	8	0	0.227402	0
ENSG00000207607	6.13825	70.4363	0.0127308	0.456528	MIR200A	1	1167863	1167952	+	90	miRNA	microRNA 200a [Source:HGNC Symbol;Acc:HGNC:31578]	-	8	0	5.25298	0
ENSG00000220305	-5.91536	60.3531	0.0127308	0.456528	HNRNPH1P1	6	159712801	159713985	-	1185	processed_pseudogene	heterogeneous nuclear ribonucleoprotein H1 pseudogene 1 [Source:HGNC Symbol;Acc:HGNC:48751]	-	0	8	0	0.340254
ENSG00000060558	-5.91536	60.3531	0.0127308	0.456528	GNA15	19	3136193	3163769	+	2613	protein_coding	G protein subunit alpha 15 [Source:HGNC Symbol;Acc:HGNC:4383]	-	0	8	0	0.154306
ENSG00000215156	-5.91536	60.3531	0.0127308	0.456528	AC138409.1	5	34190056	34193653	+	3598	processed_pseudogene	integral membrane glycoprotein-like [Source:NCBI gene;Acc:646652]	-	0	8	0	0.112063
ENSG00000163705	-6.08262	67.7723	0.0127308	0.456528	FANCD2OS	3	10081317	10108231	-	1895	protein_coding	FANCD2 opposite strand [Source:HGNC Symbol;Acc:HGNC:28623]	-	0	9	0	0.239367
ENSG00000261216	-5.91536	60.3531	0.0127308	0.456528	AC007216.2	16	11908208	11908916	+	384	antisense	novel transcript, antisense to GSPT1	-	0	8	0	1.05
ENSG00000238245	-6.08262	67.7723	0.0127308	0.456528	MYO5BP2	9	62857208	62858484	+	1277	processed_pseudogene	myosin VB pseudogene 2 [Source:HGNC Symbol;Acc:HGNC:38496]	-	0	9	0	0.355208
ENSG00000223313	-5.91536	60.3531	0.0127308	0.456528	RNU6-516P	15	40529570	40529673	+	104	snRNA	RNA, U6 small nuclear 516, pseudogene [Source:HGNC Symbol;Acc:HGNC:47479]	-	0	8	0	3.87693
ENSG00000237758	-5.91536	60.3531	0.0127308	0.456528	BANF1P3	2	230725143	230725403	-	261	processed_pseudogene	barrier to autointegration factor 1 pseudogene 3 [Source:HGNC Symbol;Acc:HGNC:43883]	-	0	8	0	1.54483
ENSG00000240132	-6.08262	67.7723	0.0127308	0.456528	ETF1P2	7	151501878	151503463	+	1586	processed_pseudogene	eukaryotic translation termination factor 1 pseudogene 2 [Source:HGNC Symbol;Acc:HGNC:3479]	-	0	9	0	0.286003
ENSG00000224401	-6.08262	67.7723	0.0127308	0.456528	RPL7P57	X	47840963	47841702	-	740	processed_pseudogene	ribosomal protein L7 pseudogene 57 [Source:HGNC Symbol;Acc:HGNC:35901]	-	0	9	0	0.612974
ENSG00000226377	-5.91536	60.3531	0.0127308	0.456528	AC084809.1	17	32876759	32878637	+	591	antisense	novel transcript	-	0	8	0	0.682235
ENSG00000260583	-6.08262	67.7723	0.0127308	0.456528	LINC00515	21	25582770	25583326	-	557	antisense	long intergenic non-protein coding RNA 515 [Source:NCBI gene;Acc:282566]	-	0	9	0	0.814364
ENSG00000272555	-6.08262	67.7723	0.0127308	0.456528	AC009974.1	2	218818690	218819144	+	455	lincRNA	novel transcript	-	0	9	0	0.996925
ENSG00000230131	-5.91536	60.3531	0.0127308	0.456528	AL160290.2	10	123356450	123517708	+	1245	lincRNA	novel transcript	-	0	8	0	0.323856
ENSG00000269892	-5.91536	60.3531	0.0127308	0.456528	AC125494.2	12	6742985	6743641	+	657	lincRNA	novel transcript	-	0	8	0	0.6137
ENSG00000279803	-6.08262	67.7723	0.0127308	0.456528	AC009090.5	16	57142652	57144936	+	2285	TEC	TEC	-	0	9	0	0.198512
ENSG00000271924	-5.91536	60.3531	0.0127308	0.456528	RNA5SP108	2	161409554	161409670	+	117	rRNA_pseudogene	RNA, 5S ribosomal pseudogene 108 [Source:HGNC Symbol;Acc:HGNC:42906]	-	0	8	0	3.44616
ENSG00000273403	-6.08262	67.7723	0.0127308	0.456528	AC107294.3	3	184741937	184742462	+	526	lincRNA	novel transcript	-	0	9	0	0.862359
ENSG00000175084	-6.08262	67.7723	0.0127308	0.456528	DES	2	219418377	219426739	+	2464	protein_coding	desmin [Source:HGNC Symbol;Acc:HGNC:2770]	-	0	9	0	0.184091
ENSG00000265625	-5.91536	60.3531	0.0127308	0.456528	AC104564.5	17	29644796	29645847	-	1052	sense_intronic	novel transcript, sense intronic to SSH2	-	0	8	0	0.383271
ENSG00000259677	-5.91536	60.3531	0.0127308	0.456528	AC027176.2	15	89876540	89877285	+	746	processed_pseudogene	Arginine/serine-rich coiled-coil protein (RSRC2) pseudogene	-	0	8	0	0.540484
ENSG00000274259	-5.91536	60.3531	0.0127308	0.456528	SYNGAP1-AS1	6	33437363	33454453	-	779	antisense	SYNGAP1 antisense RNA 1 [Source:HGNC Symbol;Acc:HGNC:53831]	-	0	8	0	0.517588
ENSG00000270462	-5.91536	60.3531	0.0127308	0.456528	AC005034.2	2	75697583	75697996	+	414	antisense	novel transcript, antisense to C2orf3	-	0	8	0	0.973915
ENSG00000163263	-5.91536	60.3531	0.0127308	0.456528	C1orf189	1	154199372	154206333	-	387	protein_coding	chromosome 1 open reading frame 189 [Source:HGNC Symbol;Acc:HGNC:32305]	-	0	8	0	1.04186
ENSG00000254094	-6.08262	67.7723	0.0127308	0.456528	AC078852.2	4	1356581	1358075	+	527	sense_intronic	novel transcript	-	0	9	0	0.860723
ENSG00000198099	-5.91536	60.3531	0.0127308	0.456528	ADH4	4	99123657	99157792	-	2453	protein_coding	alcohol dehydrogenase 4 (class II), pi polypeptide [Source:HGNC Symbol;Acc:HGNC:252]	-	0	8	0	0.164371
ENSG00000229068	-5.91536	60.3531	0.0127308	0.456528	TMPOP1	6	30466452	30467994	+	1267	processed_pseudogene	thymopoietin pseudogene 1 [Source:HGNC Symbol;Acc:HGNC:21364]	-	0	8	0	0.318233
ENSG00000267607	-5.91536	60.3531	0.0127308	0.456528	AC011511.5	19	10285801	10289019	-	3219	antisense	novel transcript, antisense to ICAM4 and ICAM1	-	0	8	0	0.125257
ENSG00000176746	-5.91536	60.3531	0.0127308	0.456528	MAGEB6	X	26192440	26195646	+	1949	protein_coding	MAGE family member B6 [Source:HGNC Symbol;Acc:HGNC:23796]	-	0	8	0	0.206876
ENSG00000280116	-5.91536	60.3531	0.0127308	0.456528	AC231657.2	X	49155242	49157351	-	255	unprocessed_pseudogene	MAGI family member, X-linked (MAGIX) pseudogene	-	0	8	0	1.58118
ENSG00000107859	-5.91536	60.3531	0.0127308	0.456528	PITX3	10	102230186	102241474	-	1391	protein_coding	paired like homeodomain 3 [Source:HGNC Symbol;Acc:HGNC:9006]	Homeobox	0	8	0	0.289864
ENSG00000228808	-5.91536	60.3531	0.0127308	0.456528	HMGB3P4	13	99372173	99372686	+	514	processed_pseudogene	high mobility group box 3 pseudogene 4 [Source:HGNC Symbol;Acc:HGNC:39104]	-	0	8	0	0.784438
ENSG00000187550	-6.08262	67.7723	0.0127308	0.456528	SBK2	19	55529733	55537089	-	1092	protein_coding	SH3 domain binding kinase family member 2 [Source:HGNC Symbol;Acc:HGNC:34416]	-	0	9	0	0.415386
ENSG00000199890	-5.91536	60.3531	0.0127308	0.456528	RF00019	1	111446798	111446908	+	111	misc_RNA		-	0	8	0	3.63244
ENSG00000228522	6.13825	70.4363	0.0127308	0.456528	AL845321.1	9	63330326	63343660	+	873	transcribed_unprocessed_pseudogene	monofunctional C1-tetrahydrofolate synthase, mitochondrial-like [Source:NCBI gene;Acc:100996643]	-	8	0	0.541545	0
ENSG00000263338	6.13825	70.4363	0.0127308	0.456528	AC027796.5	17	3577955	3578853	-	560	sense_intronic	novel transcript, sense intronic to TRPV1	-	8	0	0.84423	0
ENSG00000213695	6.13825	70.4363	0.0127308	0.456528	RPS7P14	X	74409518	74410100	+	583	processed_pseudogene	ribosomal protein S7 pseudogene 14 [Source:HGNC Symbol;Acc:HGNC:36602]	-	8	0	0.810924	0
ENSG00000280924	6.13825	70.4363	0.0127308	0.456528	LINC00628	1	204368431	204369719	-	1289	lincRNA	long intergenic non-protein coding RNA 628 [Source:HGNC Symbol;Acc:HGNC:27008]	-	8	0	0.366772	0
ENSG00000258914	-5.91536	60.3531	0.0127308	0.456528	AL132712.2	14	103875055	103877478	+	127	lincRNA	novel transcript	-	0	8	0	3.17481
ENSG00000271749	-5.91536	60.3531	0.0127308	0.456528	AC005828.6	17	63393355	63393586	+	232	unprocessed_pseudogene	mitochondrially encoded cytochrome c oxidase III (MT-CO3) pseudogene	-	0	8	0	1.73793
ENSG00000236065	-6.08262	67.7723	0.0127308	0.456528	AL020995.1	1	32987075	33032469	+	1680	antisense	novel transcript	-	0	9	0	0.270001
ENSG00000253567	-6.08262	67.7723	0.0127308	0.456528	AC025871.1	8	28447264	28455902	+	733	antisense	novel transcript	-	0	9	0	0.618828
ENSG00000136250	-5.91536	60.3531	0.0127308	0.456528	AOAH	7	36512949	36724549	-	3510	protein_coding	acyloxyacyl hydrolase [Source:HGNC Symbol;Acc:HGNC:548]	-	0	8	0	0.114872
ENSG00000126752	-6.08262	67.7723	0.0127308	0.456528	SSX1	X	48255317	48267444	+	1298	protein_coding	SSX family member 1 [Source:HGNC Symbol;Acc:HGNC:11335]	-	0	9	0	0.349461
ENSG00000273606	-6.08262	67.7723	0.0127308	0.456528	MIR6776	17	2692861	2692919	-	59	miRNA	microRNA 6776 [Source:HGNC Symbol;Acc:HGNC:50193]	-	0	9	0	7.68815
ENSG00000129455	-6.08262	67.7723	0.0127308	0.456528	KLK8	19	50996007	51002711	-	1865	protein_coding	kallikrein related peptidase 8 [Source:HGNC Symbol;Acc:HGNC:6369]	-	0	9	0	0.243218
ENSG00000279320	-6.08262	67.7723	0.0127308	0.456528	AC069528.2	3	146504570	146506560	-	1991	TEC	TEC	-	0	9	0	0.227826
ENSG00000248901	-5.91536	60.3531	0.0127308	0.456528	LINC01846	5	98086260	98161193	-	651	lincRNA	long intergenic non-protein coding RNA 1846 [Source:HGNC Symbol;Acc:HGNC:52661]	-	0	8	0	0.619356
ENSG00000252615	-5.91536	60.3531	0.0127308	0.456528	RF00019	6	151378000	151378099	-	100	misc_RNA		-	0	8	0	4.03201
ENSG00000215005	-6.08262	67.7723	0.0127308	0.456528	HSPD1P7	21	28887280	28889272	-	1686	processed_pseudogene	heat shock protein family D (Hsp60) member 1 pseudogene 7 [Source:HGNC Symbol;Acc:HGNC:5268]	-	0	9	0	0.26904
ENSG00000230899	-6.08262	67.7723	0.0127308	0.456528	MAGEA8-AS1	X	149878836	149881070	-	476	antisense	MAGEA8 antisense RNA 1 [Source:HGNC Symbol;Acc:HGNC:45093]	-	0	9	0	0.952943
ENSG00000269524	-6.08262	67.7723	0.0127308	0.456528	AC245052.7	19	54224523	54224881	+	359	lincRNA	novel transcript	-	0	9	0	1.26351
ENSG00000232215	-5.91536	60.3531	0.0127308	0.456528	OR2L6P	1	248003129	248004068	+	940	unprocessed_pseudogene	olfactory receptor family 2 subfamily L member 6 pseudogene [Source:HGNC Symbol;Acc:HGNC:15012]	-	0	8	0	0.428937
ENSG00000250968	-5.91536	60.3531	0.0127308	0.456528	LINC02382	4	170742469	170743718	-	614	lincRNA	long intergenic non-protein coding RNA 2382 [Source:HGNC Symbol;Acc:HGNC:53305]	-	0	8	0	0.656679
ENSG00000248980	-5.91536	60.3531	0.0127308	0.456528	AC019163.1	4	176308268	176320458	-	610	antisense	novel transcript	-	0	8	0	0.660985
ENSG00000265258	-5.91536	60.3531	0.0127308	0.456528	MIR4686	11	2173063	2173138	+	76	miRNA	microRNA 4686 [Source:HGNC Symbol;Acc:HGNC:41601]	-	0	8	0	5.30527
ENSG00000285714	6.13825	70.4363	0.0127308	0.456528	AL159158.1	13	77417821	77422847	+	655	lincRNA	novel transcript	-	8	0	0.721784	0
ENSG00000212572	-5.91536	60.3531	0.0127308	0.456528	RNU6-903P	18	9617964	9618072	-	109	snRNA	RNA, U6 small nuclear 903, pseudogene [Source:HGNC Symbol;Acc:HGNC:47866]	-	0	8	0	3.69909
ENSG00000277558	-5.91536	60.3531	0.0127308	0.456528	AL109923.1	20	34476205	34476787	+	583	sense_intronic	novel transcript, sense intronic to ITCH	-	0	8	0	0.691597
ENSG00000277690	-5.91536	60.3531	0.0127308	0.456528	AC023490.2	22	18527157	18527626	+	470	processed_pseudogene	transmembrane protein 191A [Source:NCBI gene;Acc:100996401]	-	0	8	0	0.857874
ENSG00000187175	6.13825	70.4363	0.0127308	0.456528	KRTAP12-1	21	44681576	44682163	-	588	protein_coding	keratin associated protein 12-1 [Source:HGNC Symbol;Acc:HGNC:20529]	-	8	0	0.804028	0
ENSG00000213533	1.37931	2.60144	0.0128535	0.460218	STIMATE	3	52836219	52897596	-	5730	protein_coding	STIM activating enhancer [Source:HGNC Symbol;Acc:HGNC:30526]	-	58	26	0.59818	0.228692
ENSG00000138400	-1.48224	2.79382	0.012963	0.462459	MDH1B	2	206737763	206765547	-	3110	protein_coding	malate dehydrogenase 1B [Source:HGNC Symbol;Acc:HGNC:17836]	-	14	46	0.266027	0.745468
ENSG00000172458	1.54034	2.90863	0.012963	0.462459	IL17D	13	20702127	20723098	+	3327	protein_coding	interleukin 17D [Source:HGNC Symbol;Acc:HGNC:5984]	-	40	16	0.710503	0.242381
ENSG00000120693	1.34975	2.54868	0.012998	0.462459	SMAD9	13	36844831	36920765	-	5723	protein_coding	SMAD family member 9 [Source:HGNC Symbol;Acc:HGNC:6774]	MH1	59	27	0.609238	0.237778
ENSG00000150551	1.13872	2.20185	0.0130861	0.462459	LYPD1	2	132644853	132671579	-	2412	protein_coding	LY6/PLAUR domain containing 1 [Source:HGNC Symbol;Acc:HGNC:28431]	-	162	86	3.96914	1.79702
ENSG00000277117	1.2239	2.33577	0.0131465	0.462459	FP565260.3	21	5022493	5040666	+	3357	protein_coding	Homo sapiens ICOS ligand (LOC102723996), mRNA. [Source:RefSeq mRNA;Acc:NM_001363770]	-	90	45	1.58435	0.675605
ENSG00000185664	1.6984	3.24541	0.0131493	0.462459	PMEL	12	55954105	55973317	-	3901	protein_coding	premelanosome protein [Source:HGNC Symbol;Acc:HGNC:10880]	-	28	10	0.424171	0.129198
ENSG00000213468	-1.75907	3.3848	0.0131493	0.462459	FIRRE	X	131688779	131830643	-	9262	processed_transcript	firre intergenic repeating RNA element [Source:HGNC Symbol;Acc:HGNC:49627]	-	8	32	0.0510439	0.174131
ENSG00000257150	-1.75907	3.3848	0.0131493	0.462459	PGAM1P5	12	95551582	95673999	+	2367	transcribed_processed_pseudogene	phosphoglycerate mutase 1 pseudogene 5 [Source:HGNC Symbol;Acc:HGNC:42452]	-	8	32	0.199733	0.68137
ENSG00000241962	-2.26466	4.80541	0.0132311	0.462459	AC079447.1	2	99141485	99322741	+	1993	protein_coding	novel protein, C2orf15-MRPL30-novel lincRNA readthrough	-	4	23	0.118607	0.581637
ENSG00000228192	-2.20091	4.59769	0.0132311	0.462459	AL512353.1	1	42834681	42846422	-	1617	antisense	novel transcript, antisense to ERMAP	-	4	22	0.146187	0.685716
ENSG00000231466	-2.26466	4.80541	0.0132311	0.462459	AL022324.2	22	25349543	25350322	-	780	processed_pseudogene	PHD finger protein 10 (PHF10) pseudogene	-	4	23	0.303057	1.48616
ENSG00000125571	1.18102	2.26738	0.0132407	0.462459	IL37	2	112912971	112918882	+	839	protein_coding	interleukin 37 [Source:HGNC Symbol;Acc:HGNC:15563]	-	130	67	9.15672	4.0248
ENSG00000163121	-3.21739	9.30103	0.0134121	0.462459	NEURL3	2	96497643	96508109	-	2497	protein_coding	neuralized E3 ubiquitin protein ligase 3 [Source:HGNC Symbol;Acc:HGNC:25162]	-	1	12	0.0236668	0.242211
ENSG00000159761	-3.21739	9.30103	0.0134121	0.462459	C16orf86	16	67666816	67668758	+	1789	protein_coding	chromosome 16 open reading frame 86 [Source:HGNC Symbol;Acc:HGNC:33755]	-	1	12	0.033033	0.338067
ENSG00000257702	-3.21739	9.30103	0.0134121	0.462459	LBX2-AS1	2	74502595	74504678	+	2084	antisense	LBX2 antisense RNA 1 [Source:HGNC Symbol;Acc:HGNC:25136]	-	1	12	0.028357	0.290212
ENSG00000269843	3.3824	10.4281	0.0134121	0.462459	AC008537.2	19	40831221	40837210	-	482	lincRNA	novel transcript	-	10	1	1.22606	0.104565
ENSG00000235298	-3.21739	9.30103	0.0134121	0.462459	AL354733.3	9	83972233	83975777	+	390	antisense	novel transcript	-	1	12	0.151528	1.55077
ENSG00000226245	-3.21739	9.30103	0.0134121	0.462459	ZNF32-AS1	10	43643872	43645047	+	434	antisense	ZNF32 antisense RNA 1 [Source:HGNC Symbol;Acc:HGNC:23577]	-	1	12	0.136166	1.39355
ENSG00000164972	3.3824	10.4281	0.0134121	0.462459	C9orf24	9	34379019	34397832	-	1439	protein_coding	chromosome 9 open reading frame 24 [Source:HGNC Symbol;Acc:HGNC:19919]	-	10	1	0.410675	0.0350244
ENSG00000283761	-3.21739	9.30103	0.0134121	0.462459	AC118553.2	1	99970011	100083321	+	5765	protein_coding	novel protein	-	1	12	0.0102508	0.104909
ENSG00000226706	-3.21739	9.30103	0.0134121	0.462459	AL161452.1	9	135503273	135506447	-	1117	antisense	uncharacterized LOC101928525 [Source:NCBI gene;Acc:101928525]	-	1	12	0.0529061	0.541451
ENSG00000255236	-3.21739	9.30103	0.0134121	0.462459	AP002992.1	11	68122053	68130518	+	776	antisense	novel transcript	-	1	12	0.0761547	0.779383
ENSG00000262115	-3.21739	9.30103	0.0134121	0.462459	AC027601.2	17	81197393	81200288	+	805	antisense	novel transcript, antisense to AZI1	-	1	12	0.0734113	0.751306
ENSG00000272006	3.3824	10.4281	0.0134121	0.462459	AC037487.3	17	64951498	64951609	-	112	processed_pseudogene	eyes shut homolog (Drosophila) 9 (EYS) pseudogene	-	10	1	5.27643	0.450001
ENSG00000147588	-3.21739	9.30103	0.0134121	0.462459	PMP2	8	81440326	81447523	-	3608	protein_coding	peripheral myelin protein 2 [Source:HGNC Symbol;Acc:HGNC:9117]	-	1	12	0.0163792	0.167628
ENSG00000274897	-1.67853	3.20101	0.013705	0.471862	PANO1	11	797511	799190	+	1680	protein_coding	proapoptotic nucleolar protein 1 [Source:HGNC Symbol;Acc:HGNC:51237]	-	9	34	0.316586	1.02
ENSG00000176170	1.04372	2.06153	0.0137532	0.472822	SPHK1	17	76376584	76387860	+	4416	protein_coding	sphingosine kinase 1 [Source:HGNC Symbol;Acc:HGNC:11240]	-	779	442	10.4248	5.04458
ENSG00000235609	-1.1832	2.2708	0.0138259	0.474596	AF127577.4	21	14818843	15014430	-	5929	lincRNA	novel transcript	-	50	133	0.498365	1.13058
ENSG00000240602	-1.10576	2.15212	0.0138455	0.474596	AADACP1	3	151770428	151784894	+	2012	transcribed_unprocessed_pseudogene	arylacetamide deacetylase pseudogene 1 [Source:HGNC Symbol;Acc:HGNC:50305]	-	104	262	3.05467	6.56304
ENSG00000152256	-1.02982	2.04176	0.0141287	0.48359	PDK1	2	172555373	172608669	+	14883	protein_coding	pyruvate dehydrogenase kinase 1 [Source:HGNC Symbol;Acc:HGNC:8809]	-	751	1794	2.982	6.07524
ENSG00000204385	-1.6105	3.05357	0.0141787	0.484592	SLC44A4	6	31863192	31879046	-	3372	protein_coding	solute carrier family 44 member 4 [Source:HGNC Symbol;Acc:HGNC:13941]	-	10	36	0.175255	0.538079
ENSG00000261578	-2.07045	4.20019	0.0143802	0.487216	AP003119.3	11	76800364	76804555	+	4192	sense_overlapping	novel transcript, overlapping to TSKU	-	5	25	0.0704867	0.300573
ENSG00000121454	-2.07045	4.20019	0.0143802	0.487216	LHX4	1	180230286	180278982	+	6061	protein_coding	LIM homeobox 4 [Source:HGNC Symbol;Acc:HGNC:21734]	Homeobox	5	25	0.0487511	0.207887
ENSG00000234818	-2.07045	4.20019	0.0143802	0.487216	AC007314.1	2	10589166	10604830	+	565	antisense	novel transcript	-	5	25	0.522974	2.23009
ENSG00000184702	1.36438	2.57465	0.0143995	0.487216	2022-09-05	22	19714464	19724224	+	4603	protein_coding	septin 5 [Source:HGNC Symbol;Acc:HGNC:9164]	-	53	24	0.680446	0.262786
ENSG00000213782	-1.37734	2.59789	0.0143995	0.487216	DDX47	12	12813316	12829981	+	5040	protein_coding	DEAD-box helicase 47 [Source:HGNC Symbol;Acc:HGNC:18682]	-	20	61	0.234508	0.610001
ENSG00000185432	-2.23316	4.70162	0.0144854	0.487216	METTL7A	12	50923472	50932517	+	4083	protein_coding	methyltransferase like 7A [Source:HGNC Symbol;Acc:HGNC:24550]	-	3	17	0.0434211	0.209846
ENSG00000154252	2.49593	5.64091	0.0144854	0.487216	GAL3ST2	2	241776825	241804208	+	1370	protein_coding	galactose-3-O-sulfotransferase 2 [Source:HGNC Symbol;Acc:HGNC:24869]	-	15	3	0.647037	0.110365
ENSG00000267216	2.49593	5.64091	0.0144854	0.487216	AC020915.1	19	58278966	58315197	+	4227	protein_coding	novel transcript	-	15	3	0.209709	0.0357701
ENSG00000265451	-2.23316	4.70162	0.0144854	0.487216	AC012447.1	2	121530422	121532705	+	682	antisense	novel transcript, antisense to CLASP1	-	3	17	0.259953	1.25631
ENSG00000227028	-2.23316	4.70162	0.0144854	0.487216	SLC8A1-AS1	2	39786453	40255209	+	8475	antisense	SLC8A1 antisense RNA 1 [Source:HGNC Symbol;Acc:HGNC:44102]	-	3	17	0.020919	0.101098
ENSG00000278231	-2.23316	4.70162	0.0144854	0.487216	AL133342.1	20	48821688	48849458	-	366	lincRNA	novel transcript	-	3	17	0.484394	2.34099
ENSG00000176171	-1.01755	2.02447	0.0145538	0.488812	BNIP3	10	131966455	131982013	-	5325	protein_coding	BCL2 interacting protein 3 [Source:HGNC Symbol;Acc:HGNC:1084]	-	1650	3908	18.3115	36.9885
ENSG00000172572	-1.11543	2.1666	0.0146587	0.491625	PDE3A	12	20369245	20684381	+	8398	protein_coding	phosphodiesterase 3A [Source:HGNC Symbol;Acc:HGNC:8778]	-	82	208	0.577028	1.2483
ENSG00000215146	-1.05415	2.07649	0.0147676	0.494565	BX322639.1	10	42331866	42367974	-	7208	transcribed_unprocessed_pseudogene	zinc finger protein 91 pseudogene [Source:NCBI gene;Acc:441666]	-	207	503	1.69713	3.5171
ENSG00000198786	-1.00972	2.01351	0.014812	0.49498	MT-ND5	MT	12337	14148	+	1812	protein_coding	mitochondrially encoded NADH:ubiquinone oxidoreductase core subunit 5 [Source:HGNC Symbol;Acc:HGNC:7461]	-	25676	60482	837.39	1682.28
ENSG00000198712	-1.0091	2.01266	0.0148517	0.49498	MT-CO2	MT	7586	8269	+	684	protein_coding	mitochondrially encoded cytochrome c oxidase II [Source:HGNC Symbol;Acc:HGNC:7421]	-	60426	142278	5220.67	10483.7
ENSG00000103056	-1.31382	2.48599	0.0148649	0.49498	SMPD3	16	68358325	68448688	-	7166	protein_coding	sphingomyelin phosphodiesterase 3 [Source:HGNC Symbol;Acc:HGNC:14240]	-	24	70	0.197922	0.492326
ENSG00000228486	-1.31382	2.48599	0.0148649	0.49498	C2orf92	2	97664217	97703064	+	6501	protein_coding	chromosome 2 open reading frame 92 [Source:HGNC Symbol;Acc:HGNC:49272]	-	24	70	0.218167	0.542687
ENSG00000197249	-1.53717	2.90225	0.014931	0.495766	SERPINA1	14	94376747	94390693	-	4902	protein_coding	serpin family A member 1 [Source:HGNC Symbol;Acc:HGNC:8941]	-	12	41	0.144666	0.421543
ENSG00000165935	-1.53717	2.90225	0.014931	0.495766	SMCO2	12	27466810	27502185	+	1978	protein_coding	single-pass membrane protein with coiled-coil domains 2 [Source:HGNC Symbol;Acc:HGNC:34448]	-	12	41	0.35852	1.04469
ENSG00000170296	-1.15248	2.22296	0.0150393	0.498649	GABARAP	17	7240014	7242770	-	2266	protein_coding	GABA type A receptor-associated protein [Source:HGNC Symbol;Acc:HGNC:4067]	-	58	151	1.51261	3.35852
ENSG00000231064	1.52051	2.86892	0.0152297	0.503532	AC234582.1	1	155195004	155205495	+	2466	antisense	novel transcript, antisense to THBS3	-	37	15	0.886681	0.30657
ENSG00000188037	-1.49124	2.81131	0.0152297	0.503532	CLCN1	7	143316126	143352083	+	3306	protein_coding	chloride voltage-gated channel 1 [Source:HGNC Symbol;Acc:HGNC:2019]	-	13	43	0.23238	0.655537
ENSG00000251495	1.73303	3.32426	0.0153054	0.504602	PPIAP11	5	82009602	82010094	-	493	processed_pseudogene	peptidylprolyl isomerase A pseudogene 11 [Source:HGNC Symbol;Acc:HGNC:9263]	-	23	8	2.75702	0.817852
ENSG00000267390	-1.9233	3.7929	0.0153054	0.504602	AC036176.1	18	63367328	63381629	+	785	antisense	novel transcript, antisense to KDSR	-	6	27	0.45169	1.73351
ENSG00000164776	-1.45062	2.73326	0.0154873	0.509877	PHKG1	7	56080283	56092996	-	2762	protein_coding	phosphorylase kinase catalytic subunit gamma 1 [Source:HGNC Symbol;Acc:HGNC:8930]	-	14	45	0.299546	0.821146
ENSG00000167103	-1.41442	2.66553	0.0157099	0.51575	PIP5KL1	9	127920879	127930797	-	3341	protein_coding	phosphatidylinositol-4-phosphate 5-kinase like 1 [Source:HGNC Symbol;Acc:HGNC:28711]	-	15	47	0.265322	0.709011
ENSG00000275496	-1.41442	2.66553	0.0157099	0.51575	CU633906.1	21	6228966	6267317	-	2878	lincRNA	uncharacterized LOC102724701 [Source:NCBI gene;Acc:102724701]	-	15	47	0.308006	0.823073
ENSG00000143847	-1.17879	2.26387	0.0158734	0.519655	PPFIA4	1	203026498	203078740	+	9707	protein_coding	PTPRF interacting protein alpha 4 [Source:HGNC Symbol;Acc:HGNC:9248]	-	46	122	0.280047	0.633441
ENSG00000221164	-1.17879	2.26387	0.0158734	0.519655	SNORA11F	10	73126080	73126207	-	128	snoRNA	small nucleolar RNA, H/ACA box 11F [Source:HGNC Symbol;Acc:HGNC:52189]	-	46	122	21.2377	48.0376
ENSG00000205090	1.68548	3.21648	0.0160516	0.522016	TMEM240	1	1535174	1540453	-	1380	protein_coding	transmembrane protein 240 [Source:HGNC Symbol;Acc:HGNC:25186]	-	25	9	1.07058	0.328696
ENSG00000101222	1.68548	3.21648	0.0160516	0.522016	SPEF1	20	3777504	3781448	-	1925	protein_coding	sperm flagellar 1 [Source:HGNC Symbol;Acc:HGNC:15874]	-	25	9	0.767481	0.235637
ENSG00000222898	-1.8074	3.5001	0.0160516	0.522016	RN7SKP97	8	61631680	61632012	-	333	misc_RNA	RNA, 7SK small nuclear pseudogene 97 [Source:HGNC Symbol;Acc:HGNC:45821]	-	7	29	1.24226	4.3892
ENSG00000241764	1.39029	2.62131	0.0160701	0.522016	AC002467.1	7	107742817	107744581	-	984	antisense	uncharacterized LOC101927974 [Source:NCBI gene;Acc:101927974]	-	45	20	2.70256	1.02439
ENSG00000242147	-1.09183	2.13144	0.0160774	0.522016	AL365356.5	10	5594991	5596118	-	697	lincRNA	uncharacterized LOC105376382 [Source:NCBI gene;Acc:105376382]	-	101	252	8.56342	18.2221
ENSG00000131067	-1.08799	2.12578	0.0160799	0.522016	GGT7	20	34844720	34872860	-	2966	protein_coding	gamma-glutamyltransferase 7 [Source:HGNC Symbol;Acc:HGNC:4259]	-	88	219	1.75336	3.72138
ENSG00000258738	1.34155	2.53424	0.0164527	0.528793	AL121603.2	14	34874343	34876459	+	2117	antisense	novel transcript, antisense to BAZ1A	-	50	23	1.39575	0.547569
ENSG00000261934	-1.99079	3.97455	0.0164929	0.528793	PCDHGA9	5	141402932	141512979	+	4749	protein_coding	protocadherin gamma subfamily A, 9 [Source:HGNC Symbol;Acc:HGNC:8707]	-	4	19	0.0497756	0.201643
ENSG00000232546	-1.99079	3.97455	0.0164929	0.528793	AC027644.1	7	66848496	66858136	+	298	unprocessed_pseudogene	pseudogene similar to part of general transcription factor II, i (GTF2I)	-	4	19	0.793236	3.21343
ENSG00000259856	1.96327	3.89945	0.0164929	0.528793	RAB43P1	16	46626404	46626992	-	589	processed_pseudogene	RAB43 pseudogene 1 [Source:HGNC Symbol;Acc:HGNC:33153]	-	17	5	1.70566	0.427845
ENSG00000186583	2.27576	4.84253	0.0164929	0.528793	SPATC1	8	144012414	144047085	+	2007	protein_coding	spermatogenesis and centriole associated 1 [Source:HGNC Symbol;Acc:HGNC:30510]	-	17	4	0.500565	0.100449
ENSG00000280099	-1.99079	3.97455	0.0164929	0.528793	AL603750.1	1	85152487	85154203	-	1717	TEC	TEC	-	4	19	0.137673	0.557718
ENSG00000187838	2.27576	4.84253	0.0164929	0.528793	PLSCR3	17	7389727	7394843	-	2834	protein_coding	phospholipid scramblase 3 [Source:HGNC Symbol;Acc:HGNC:16495]	-	17	4	0.354493	0.0711364
ENSG00000261242	-1.99079	3.97455	0.0164929	0.528793	AL136038.3	14	63543569	63544664	+	1096	antisense	novel transcript, antisense to PPP2R5E	-	4	19	0.215679	0.873725
ENSG00000238280	-1.99079	3.97455	0.0164929	0.528793	AC067751.1	10	62682652	62805887	-	1252	antisense	novel transcript	-	4	19	0.188805	0.764858
ENSG00000241404	-1.35355	2.5554	0.0165489	0.529862	EGFL8	6	32164583	32168281	+	2621	protein_coding	EGF like domain multiple 8 [Source:HGNC Symbol;Acc:HGNC:13944]	-	20	60	0.450943	1.15376
ENSG00000118997	-1.33075	2.51534	0.0166329	0.53182	DNAH7	2	195737703	196068812	-	21324	protein_coding	dynein axonemal heavy chain 7 [Source:HGNC Symbol;Acc:HGNC:18661]	-	21	62	0.0581982	0.146539
ENSG00000277075	-1.2593	2.3938	0.0169166	0.540148	HIST1H2AE	6	26216975	26217483	+	509	protein_coding	histone cluster 1 H2A family member e [Source:HGNC Symbol;Acc:HGNC:4724]	-	26	73	3.01866	7.22831
ENSG00000176749	1.13734	2.19976	0.0170311	0.54218	CDK5R1	17	32486619	32491256	+	4325	protein_coding	cyclin dependent kinase 5 regulatory subunit 1 [Source:HGNC Symbol;Acc:HGNC:1775]	-	128	68	1.74897	0.792418
ENSG00000256229	-1.15049	2.21989	0.017053	0.54218	ZNF486	19	20167228	20200490	+	4261	protein_coding	zinc finger protein 486 [Source:HGNC Symbol;Acc:HGNC:20807]	zf-C2H2	55	143	0.762798	1.69144
ENSG00000197497	-1.23414	2.35241	0.0170985	0.54218	ZNF665	19	53159213	53193386	-	7475	protein_coding	zinc finger protein 665 [Source:HGNC Symbol;Acc:HGNC:25885]	zf-C2H2	33	91	0.260892	0.613567
ENSG00000104369	1.17096	2.25162	0.0171096	0.54218	JPH1	8	74234700	74321328	-	4378	protein_coding	junctophilin 1 [Source:HGNC Symbol;Acc:HGNC:14201]	-	106	55	1.43083	0.633167
ENSG00000272668	-1.17454	2.25721	0.0171188	0.54218	AL590560.1	1	159854870	159867685	+	7134	antisense	uncharacterized LOC107985216 [Source:NCBI gene;Acc:107985216]	-	45	119	0.372767	0.840708
ENSG00000170927	-1.19101	2.28313	0.0171262	0.54218	PKHD1	6	51615300	52087625	-	17454	protein_coding	PKHD1, fibrocystin/polyductin [Source:HGNC Symbol;Acc:HGNC:9016]	-	37	99	0.125275	0.285872
ENSG00000269974	-1.63563	3.10724	0.017143	0.54218	AC091057.4	15	30648797	30649529	+	733	lincRNA	novel transcript	-	9	33	0.7256	2.26904
ENSG00000137965	-1.06779	2.09622	0.0172791	0.545744	IFI44	1	78649796	78664078	+	2038	protein_coding	interferon induced protein 44 [Source:HGNC Symbol;Acc:HGNC:16938]	-	108	265	3.13169	6.5535
ENSG00000163492	-1.07092	2.10078	0.0174017	0.548872	CCDC141	2	178829757	179050086	-	15446	protein_coding	coiled-coil domain containing 141 [Source:HGNC Symbol;Acc:HGNC:26821]	-	98	241	0.374946	0.78638
ENSG00000100505	-1.04566	2.06432	0.0175161	0.550703	TRIM9	14	50975262	51096061	-	8945	protein_coding	tripartite motif containing 9 [Source:HGNC Symbol;Acc:HGNC:16288]	-	137	331	0.905105	1.865
ENSG00000147166	-1.57001	2.96906	0.0175391	0.550703	ITGB1BP2	X	71301734	71305371	+	2201	protein_coding	integrin subunit beta 1 binding protein 2 [Source:HGNC Symbol;Acc:HGNC:6154]	-	10	35	0.268496	0.801456
ENSG00000150722	-1.55221	2.93265	0.0178604	0.550703	PPP1R1C	2	181954241	182131398	+	4887	protein_coding	protein phosphatase 1 regulatory inhibitor subunit 1C [Source:HGNC Symbol;Acc:HGNC:14940]	-	11	38	0.133018	0.391898
ENSG00000225362	-1.55221	2.93265	0.0178604	0.550703	CT62	15	71110244	71115500	-	2855	protein_coding	cancer/testis antigen 62 [Source:HGNC Symbol;Acc:HGNC:27286]	-	11	38	0.227691	0.670825
ENSG00000250271	-1.55221	2.93265	0.0178604	0.550703	AC068647.2	3	151797047	151808249	+	523	transcribed_unprocessed_pseudogene	arylacetamide deacetylase (esterase) (AADAC) pseudogene	-	11	38	1.24294	3.66196
ENSG00000104332	-2.51401	5.71205	0.0178622	0.550703	SFRP1	8	41261958	41309497	-	4761	protein_coding	secreted frizzled related protein 1 [Source:HGNC Symbol;Acc:HGNC:10776]	-	2	14	0.0248251	0.148204
ENSG00000179978	-2.51401	5.71205	0.0178622	0.550703	AC140134.1	5	70094659	70128434	-	3544	unprocessed_pseudogene	NLR family, apoptosis inhibitory protein (NAIP) pseudogene	-	2	14	0.0333499	0.199098
ENSG00000280739	2.73102	6.63926	0.0178622	0.550703	EIF1B-AS1	3	40173145	40309698	-	5433	processed_transcript	EIF1B antisense RNA 1 [Source:HGNC Symbol;Acc:HGNC:44555]	-	12	2	0.130527	0.0185533
ENSG00000279792	-2.51401	5.71205	0.0178622	0.550703	AC015909.5	17	50362967	50365232	-	2266	TEC	TEC	-	2	14	0.0521589	0.311386
ENSG00000240571	-2.51401	5.71205	0.0178622	0.550703	AC087071.2	7	130173718	130205361	+	575	antisense	novel transcript	-	2	14	0.205552	1.22713
ENSG00000129214	2.73102	6.63926	0.0178622	0.550703	SHBG	17	7613946	7633383	+	1972	protein_coding	sex hormone binding globulin [Source:HGNC Symbol;Acc:HGNC:10839]	-	12	2	0.359611	0.0511157
ENSG00000280020	2.73102	6.63926	0.0178622	0.550703	AC116407.3	17	32178946	32180074	-	1129	TEC	TEC	-	12	2	0.628125	0.0892827
ENSG00000267676	-2.51401	5.71205	0.0178622	0.550703	THA1P	17	78248493	78254416	-	1145	unitary_pseudogene	threonine aldolase 1, pseudogene [Source:HGNC Symbol;Acc:HGNC:18004]	-	2	14	0.103225	0.616246
ENSG00000273243	-2.51401	5.71205	0.0178622	0.550703	Z82243.1	22	45155539	45156011	-	473	lincRNA	novel transcript	-	2	14	0.249878	1.49176
ENSG00000253859	-2.51401	5.71205	0.0178622	0.550703	AC018616.1	8	81439436	81521818	+	546	antisense	novel transcript	-	2	14	0.216469	1.29231
ENSG00000230305	2.73102	6.63926	0.0178622	0.550703	AC004980.3	7	76524515	76532692	+	365	unprocessed_pseudogene	postmeiotic segregation increased 2-like 5 (PMS2L5) pseudogene	-	12	2	1.94288	0.276165
ENSG00000279048	-2.13421	4.38998	0.0180032	0.550703	AC080080.1	7	17940503	17942922	+	2420	TEC	tec	-	4	21	0.0976795	0.437356
ENSG00000242852	-2.13421	4.38998	0.0180032	0.550703	ZNF709	19	12461184	12513854	-	5708	protein_coding	zinc finger protein 709 [Source:HGNC Symbol;Acc:HGNC:20629]	zf-C2H2	4	21	0.0414128	0.185424
ENSG00000277007	-2.13421	4.38998	0.0180032	0.550703	AC096642.1	1	219270774	219273387	+	2614	lincRNA	novel transcript	-	4	21	0.0904301	0.404898
ENSG00000227359	1.866	3.64521	0.0180032	0.550703	AC017074.1	2	113677702	113704078	-	561	lincRNA	novel transcript	-	19	6	2.00147	0.539039
ENSG00000273356	-2.13421	4.38998	0.0180032	0.550703	LINC02019	3	50669989	50672048	+	2060	lincRNA	long intergenic non-protein coding RNA 2019 [Source:HGNC Symbol;Acc:HGNC:52854]	-	4	21	0.11475	0.513788
ENSG00000128652	-2.13421	4.38998	0.0180032	0.550703	HOXD3	2	176136612	176173102	+	3548	protein_coding	homeobox D3 [Source:HGNC Symbol;Acc:HGNC:5137]	Homeobox	4	21	0.0666247	0.29831
ENSG00000175567	1.12754	2.18486	0.0181004	0.552952	UCP2	11	73974667	73983307	-	3237	protein_coding	uncoupling protein 2 [Source:HGNC Symbol;Acc:HGNC:12518]	-	129	69	2.35508	1.07433
ENSG00000186369	-1.08345	2.1191	0.0185405	0.554962	LINC00643	14	62114353	62130962	+	4637	transcribed_unitary_pseudogene	long intergenic non-protein coding RNA 643 [Source:HGNC Symbol;Acc:HGNC:44296]	-	79	196	1.00681	2.13035
ENSG00000105146	1.37176	2.58785	0.0186397	0.554962	AURKC	19	57230802	57235548	+	1948	protein_coding	aurora kinase C [Source:HGNC Symbol;Acc:HGNC:11391]	-	40	18	1.21347	0.465709
ENSG00000225265	-1.17236	2.25381	0.0186788	0.554962	TAF1A-AS1	1	222589825	222593032	+	1450	antisense	TAF1A antisense RNA 1 [Source:HGNC Symbol;Acc:HGNC:40573]	-	39	103	1.58948	3.58015
ENSG00000101493	1.36451	2.57489	0.018749	0.554962	ZNF516	18	76358190	76495190	-	8217	protein_coding	zinc finger protein 516 [Source:HGNC Symbol;Acc:HGNC:28990]	zf-C2H2	42	19	0.302061	0.116539
ENSG00000266208	1.36451	2.57489	0.018749	0.554962	AC080112.1	17	40360655	40364693	+	2094	antisense	novel transcript, antisense to GJD3	-	42	19	1.18531	0.457308
ENSG00000273443	1.36451	2.57489	0.018749	0.554962	AL645608.8	1	1062208	1063288	-	829	lincRNA	novel transcript	-	42	19	2.99401	1.15513
ENSG00000178977	-1.43952	2.7123	0.0188353	0.554962	LINC00324	17	8220642	8224043	-	2082	lincRNA	long intergenic non-protein coding RNA 324 [Source:HGNC Symbol;Acc:HGNC:26628]	-	16	51	0.454148	1.23458
ENSG00000278635	-1.40801	2.65371	0.0189024	0.554962	AC141557.2	12	9415641	9416718	+	482	unprocessed_pseudogene	WAS protein family homolog 1 (WASH1) pseudogene	-	17	53	2.0843	5.54192
ENSG00000175414	-1.25218	2.38201	0.0189502	0.554962	ARL10	5	176365468	176401865	+	11459	protein_coding	ADP ribosylation factor like GTPase 10 [Source:HGNC Symbol;Acc:HGNC:22042]	-	29	81	0.149558	0.356262
ENSG00000206140	1.31624	2.49017	0.0189536	0.554962	TMEM191C	22	21466423	21471269	+	4299	protein_coding	transmembrane protein 191C [Source:HGNC Symbol;Acc:HGNC:33601]	-	47	22	0.646084	0.257921
ENSG00000224621	-1.37939	2.60159	0.0189536	0.554962	AL451042.1	1	16159266	16161883	+	544	antisense	novel transcript	-	18	55	1.95538	5.0956
ENSG00000204442	1.03745	2.05259	0.0189779	0.554962	FAM155A	13	107163510	107866735	-	8503	protein_coding	family with sequence similarity 155 member A [Source:HGNC Symbol;Acc:HGNC:33877]	-	244	139	1.69581	0.823899
ENSG00000197776	-1.35328	2.55493	0.0189915	0.554962	KLHDC1	14	49693105	49753152	+	3006	protein_coding	kelch domain containing 1 [Source:HGNC Symbol;Acc:HGNC:19836]	-	19	57	0.373528	0.955691
ENSG00000233527	-1.30734	2.47486	0.0190353	0.554962	ZNF529-AS1	19	36573070	36594708	+	1868	antisense	ZNF529 antisense RNA 1 [Source:HGNC Symbol;Acc:HGNC:51275]	-	21	61	0.664356	1.64583
ENSG00000197093	-1.2902	2.44562	0.0190472	0.554962	GAL3ST4	7	100159244	100168750	-	3397	protein_coding	galactose-3-O-sulfotransferase 4 [Source:HGNC Symbol;Acc:HGNC:24145]	-	23	66	0.400121	0.979219
ENSG00000223552	-2.01188	4.03308	0.0191374	0.554962	AC098613.1	3	46364955	46407059	-	656	antisense	uncharacterized LOC102724297 [Source:NCBI gene;Acc:102724297]	-	5	24	0.450427	1.84391
ENSG00000185261	-2.01188	4.03308	0.0191374	0.554962	KIAA0825	5	94152966	94618597	-	10403	protein_coding	KIAA0825 [Source:HGNC Symbol;Acc:HGNC:28532]	-	5	24	0.0284034	0.116274
ENSG00000240216	-2.01188	4.03308	0.0191374	0.554962	CPHL1P	3	149229356	149291800	-	3934	transcribed_unitary_pseudogene	ceruloplasmin and hephaestin-like 1 pseudogene [Source:HGNC Symbol;Acc:HGNC:31714]	-	5	24	0.0751094	0.307474
ENSG00000138271	-1.01295	2.01803	0.0193679	0.554962	GPR87	3	151294086	151316952	-	1698	protein_coding	G protein-coupled receptor 87 [Source:HGNC Symbol;Acc:HGNC:4538]	-	213	503	7.41311	14.9301
ENSG00000105750	-1.01763	2.02459	0.0196929	0.554962	ZNF85	19	20923222	20950697	+	4668	protein_coding	zinc finger protein 85 [Source:HGNC Symbol;Acc:HGNC:13160]	zf-C2H2	176	417	2.22813	4.50232
ENSG00000267523	-1.12287	2.17781	0.0197367	0.554962	AC008735.2	19	55661901	55674715	-	561	antisense	novel transcript, antisense to U2AF2A	-	49	125	5.16169	11.23
ENSG00000228630	-1.86913	3.65312	0.0199879	0.554962	HOTAIR	12	53962308	53974956	-	2602	antisense	HOX transcript antisense RNA [Source:HGNC Symbol;Acc:HGNC:33510]	-	6	26	0.136271	0.503614
ENSG00000183773	-1.86913	3.65312	0.0199879	0.554962	AIFM3	22	20965108	20981360	+	5401	protein_coding	apoptosis inducing factor, mitochondria associated 3 [Source:HGNC Symbol;Acc:HGNC:26398]	-	6	26	0.0656501	0.242622
ENSG00000248161	-1.86913	3.65312	0.0199879	0.554962	AC098487.1	4	102418602	102450010	-	992	lincRNA	novel transcript	-	6	26	0.357436	1.32097
ENSG00000251273	-1.86913	3.65312	0.0199879	0.554962	LINC02228	5	25087450	25190956	-	3875	lincRNA	long intergenic non-protein coding RNA 2228 [Source:HGNC Symbol;Acc:HGNC:53097]	-	6	26	0.0915036	0.338168
ENSG00000249931	1.66923	3.18045	0.0199879	0.554962	GOLGA8K	15	32392782	32403292	-	3231	protein_coding	golgin A8 family member K [Source:HGNC Symbol;Acc:HGNC:38652]	-	22	8	0.402387	0.124791
ENSG00000216937	-1.05121	2.07227	0.0202205	0.554962	CCDC7	10	32446140	32882874	+	9573	protein_coding	coiled-coil domain containing 7 [Source:HGNC Symbol;Acc:HGNC:26533]	-	101	245	0.623493	1.28988
ENSG00000268230	-1.75701	3.37997	0.0206238	0.554962	AC012313.3	19	58346854	58362751	-	4151	processed_transcript	novel transcript	-	7	28	0.0996561	0.339967
ENSG00000279602	-1.75701	3.37997	0.0206238	0.554962	AC109326.1	17	43360041	43361361	-	1321	TEC	TEC	-	7	28	0.313151	1.06828
ENSG00000260398	1.62687	3.08842	0.0206238	0.554962	AC068700.1	8	78605952	78609705	+	3754	sense_overlapping	novel transcript, overlapping to PKIA	-	24	9	0.377812	0.120831
ENSG00000172650	-1.75701	3.37997	0.0206238	0.554962	AGAP5	10	73674285	73698159	-	3115	protein_coding	ArfGAP with GTPase domain, ankyrin repeat and PH domain 5 [Source:HGNC Symbol;Acc:HGNC:23467]	-	7	28	0.1328	0.453035
ENSG00000267344	-1.75701	3.37997	0.0206238	0.554962	AC003070.1	17	45396932	45397477	+	457	antisense	novel transcript, antisense to ARHGAP27	-	7	28	0.905191	3.08797
ENSG00000261573	-1.75701	3.37997	0.0206238	0.554962	AL157402.2	1	198657553	198667061	-	416	antisense	novel transcript	-	7	28	0.994405	3.39232
ENSG00000237149	1.0071	2.00987	0.0208129	0.554962	ZNF503-AS2	10	75401519	75408982	+	3348	antisense	ZNF503 antisense RNA 2 [Source:HGNC Symbol;Acc:HGNC:23525]	-	342	199	6.0367	2.99571
ENSG00000272288	-2.14641	4.42723	0.0209521	0.554962	AL451165.2	6	34696317	34697470	+	771	antisense	uncharacterized LOC101929243 [Source:NCBI gene;Acc:101929243]	-	3	16	0.229946	1.04592
ENSG00000245468	-2.14641	4.42723	0.0209521	0.554962	LINC02447	4	7094571	7103385	-	3763	lincRNA	long intergenic non-protein coding RNA 2447 [Source:HGNC Symbol;Acc:HGNC:53379]	-	3	16	0.0471135	0.214298
ENSG00000243024	-2.14641	4.42723	0.0209521	0.554962	AC012158.1	12	64222337	64397065	+	2138	transcribed_processed_pseudogene	ribosomal protein S11 pseudogene 6	-	3	16	0.0829225	0.377176
ENSG00000186417	2.39718	5.26772	0.0209521	0.554962	GLDN	15	51341629	51408013	+	7144	protein_coding	gliomedin [Source:HGNC Symbol;Acc:HGNC:29514]	-	14	3	0.11581	0.0211647
ENSG00000279649	-2.14641	4.42723	0.0209521	0.554962	AC020978.9	16	68290087	68292790	-	2704	TEC	novel transcript	-	3	16	0.0655652	0.298226
ENSG00000284523	2.39718	5.26772	0.0209521	0.554962	AC004834.1	7	99252452	99325826	-	4408	antisense	novel transcript	-	14	3	0.187692	0.0343013
ENSG00000224892	-2.14641	4.42723	0.0209521	0.554962	RPS4XP16	13	51454164	51461315	+	997	transcribed_processed_pseudogene	ribosomal protein S4X pseudogene 16 [Source:HGNC Symbol;Acc:HGNC:36365]	-	3	16	0.177822	0.808828
ENSG00000266934	-2.14641	4.42723	0.0209521	0.554962	AC005746.1	17	61382785	61384680	+	1329	sense_intronic	novel transcript, sense intronic to BCAS3	-	3	16	0.1334	0.606773
ENSG00000268744	-2.14641	4.42723	0.0209521	0.554962	AC008758.4	19	12379189	12401274	-	2593	protein_coding	novel transcript	-	3	16	0.0683719	0.310992
ENSG00000278561	-2.14641	4.42723	0.0209521	0.554962	PTPN20CP	10	48064308	48119455	-	920	unprocessed_pseudogene	protein tyrosine phosphatase, non-receptor type 20C, pseudogene [Source:HGNC Symbol;Acc:HGNC:23424]	-	3	16	0.192705	0.876524
ENSG00000236921	-2.14641	4.42723	0.0209521	0.554962	AL157937.1	9	22203990	22214672	-	443	lincRNA	novel transcript	-	3	16	0.400199	1.82032
ENSG00000229981	2.39718	5.26772	0.0209521	0.554962	LINC01435	10	107694973	108197849	-	6148	lincRNA	long intergenic non-protein coding RNA 1435 [Source:HGNC Symbol;Acc:HGNC:50753]	-	14	3	0.134571	0.0245934
ENSG00000267069	-2.14641	4.42723	0.0209521	0.554962	AP005264.1	18	12288308	12291488	+	733	lincRNA	novel transcript	-	3	16	0.241867	1.10014
ENSG00000105088	-1.66636	3.17413	0.0210963	0.554962	OLFM2	19	9853718	9936552	-	2500	protein_coding	olfactomedin 2 [Source:HGNC Symbol;Acc:HGNC:17189]	-	8	30	0.189107	0.604801
ENSG00000123999	-1.66636	3.17413	0.0210963	0.554962	INHA	2	219569162	219575713	+	1753	protein_coding	inhibin subunit alpha [Source:HGNC Symbol;Acc:HGNC:6065]	-	8	30	0.269691	0.862523
ENSG00000137841	-1.59142	3.01346	0.0214439	0.554962	PLCB2	15	40278176	40307935	-	7350	protein_coding	phospholipase C beta 2 [Source:HGNC Symbol;Acc:HGNC:9055]	-	9	32	0.0723625	0.219429
ENSG00000169083	3.23222	9.39714	0.0215665	0.554962	AR	X	67544032	67730619	+	12775	protein_coding	androgen receptor [Source:HGNC Symbol;Acc:HGNC:644]	ESR-like	9	1	0.0416332	0.00394521
ENSG00000279692	3.23222	9.39714	0.0215665	0.554962	AC110285.7	17	81395609	81397144	-	1536	TEC	TEC	-	9	1	0.346266	0.0328126
ENSG00000272086	3.23222	9.39714	0.0215665	0.554962	AC025181.2	5	32174471	32175272	+	802	lincRNA	novel transcript	-	9	1	0.663173	0.062843
ENSG00000238113	3.23222	9.39714	0.0215665	0.554962	LINC01410	9	62801461	62813486	+	3038	lincRNA	long intergenic non-protein coding RNA 1410 [Source:HGNC Symbol;Acc:HGNC:50702]	-	9	1	0.175071	0.0165899
ENSG00000149609	3.23222	9.39714	0.0215665	0.554962	C20orf144	20	33662284	33665619	+	2442	protein_coding	chromosome 20 open reading frame 144 [Source:HGNC Symbol;Acc:HGNC:16137]	-	9	1	0.217799	0.0206389
ENSG00000185272	-3.09332	8.53455	0.0215665	0.554962	RBM11	21	14216130	14228372	+	2360	protein_coding	RNA binding motif protein 11 [Source:HGNC Symbol;Acc:HGNC:9897]	-	1	11	0.0250407	0.234916
ENSG00000224897	3.23222	9.39714	0.0215665	0.554962	POT1-AS1	7	124929873	125179315	+	6304	antisense	POT1 antisense RNA 1 [Source:HGNC Symbol;Acc:HGNC:49459]	-	9	1	0.0843694	0.00799494
ENSG00000261360	3.23222	9.39714	0.0215665	0.554962	AC010491.1	5	14661808	14664604	-	2797	antisense	novel transcript, antisense to FAM105B	-	9	1	0.190155	0.0180193
ENSG00000248367	-3.09332	8.53455	0.0215665	0.554962	AC008610.1	5	180293245	180295253	+	393	antisense	novel transcript	-	1	11	0.150372	1.41069
ENSG00000284830	-3.09332	8.53455	0.0215665	0.554962	AL049557.2	1	111745299	111755537	-	4326	bidirectional_promoter_lncRNA	uncharacterized LOC101928718 [Source:NCBI gene;Acc:101928718]	-	1	11	0.0136607	0.128156
ENSG00000234801	3.23222	9.39714	0.0215665	0.554962	MORF4	4	173615936	173616906	-	971	processed_pseudogene	mortality factor 4 (pseudogene) [Source:HGNC Symbol;Acc:HGNC:15773]	-	9	1	0.547749	0.0519054
ENSG00000224725	-3.09332	8.53455	0.0215665	0.554962	CEP57L1P1	10	70389426	70390626	+	1201	processed_pseudogene	centrosomal protein 57 like 1 pseudogene 1 [Source:HGNC Symbol;Acc:HGNC:23521]	-	1	11	0.0492057	0.461616
ENSG00000255050	-3.09332	8.53455	0.0215665	0.554962	AC067930.5	8	143573490	143577397	+	1173	antisense	novel transcript	-	1	11	0.0503803	0.472635
ENSG00000231181	-3.09332	8.53455	0.0215665	0.554962	AL954705.1	1	9576427	9576985	+	559	processed_pseudogene	ribosomal protein L9 (RPL9) pseudogene	-	1	11	0.105717	0.991773
ENSG00000285863	-3.09332	8.53455	0.0215665	0.554962	AC009554.2	15	61861109	61894164	+	589	antisense	novel transcript, antisense to VPS13C	-	1	11	0.100333	0.941258
ENSG00000258199	-3.09332	8.53455	0.0215665	0.554962	AC073896.4	12	56162359	56190284	-	403	sense_overlapping	novel transcript, sense overlapping to SMARCC2	-	1	11	0.14664	1.37569
ENSG00000275703	-3.09332	8.53455	0.0215665	0.554962	U47924.3	12	6899752	6900212	+	461	lincRNA	novel transcript	-	1	11	0.128191	1.20261
ENSG00000137875	-3.09332	8.53455	0.0215665	0.554962	BCL2L10	15	52109263	52112775	-	1319	protein_coding	BCL2 like 10 [Source:HGNC Symbol;Acc:HGNC:993]	-	1	11	0.0448037	0.420319
ENSG00000225193	-3.09332	8.53455	0.0215665	0.554962	RPS12P26	15	90206572	90206967	+	396	transcribed_processed_pseudogene	ribosomal protein S12 pseudogene 26 [Source:HGNC Symbol;Acc:HGNC:36320]	-	1	11	0.149233	1.4
ENSG00000267150	-3.09332	8.53455	0.0215665	0.554962	AC006557.1	18	14089935	14091019	+	1085	antisense	novel transcript, antisense ZNF519	-	1	11	0.0544664	0.510969
ENSG00000186710	-3.09332	8.53455	0.0215665	0.554962	CFAP73	12	113149858	113159276	+	1726	protein_coding	cilia and flagella associated protein 73 [Source:HGNC Symbol;Acc:HGNC:37100]	-	1	11	0.0342387	0.321206
ENSG00000225217	3.23222	9.39714	0.0215665	0.554962	HSPA7	1	161606291	161608217	+	1927	unprocessed_pseudogene	heat shock protein family A (Hsp70) member 7 [Source:HGNC Symbol;Acc:HGNC:5240]	-	9	1	0.276007	0.0261547
ENSG00000281692	-3.09332	8.53455	0.0215665	0.554962	PACRG-AS1	6	163309985	163324530	-	2192	antisense	PACRG antisense RNA 1 [Source:HGNC Symbol;Acc:HGNC:27772]	-	1	11	0.0269599	0.25292
ENSG00000276527	3.23222	9.39714	0.0215665	0.554962	AL356515.1	13	44684487	44715393	-	415	lincRNA	novel transcript	-	9	1	1.2816	0.121446
ENSG00000204684	-3.09332	8.53455	0.0215665	0.554962	AL133464.1	20	22371216	22471557	-	4533	lincRNA	uncharacterized LOC284788 [Source:NCBI gene;Acc:284788]	-	1	11	0.0130369	0.122303
ENSG00000229422	1.27461	2.41934	0.0216315	0.554962	AL512625.2	9	62837139	62838302	-	1164	lincRNA	novel transcript	-	56	27	2.84311	1.16907
ENSG00000159885	-1.264	2.4016	0.0217082	0.554962	ZNF222	19	44025342	44033112	+	2003	protein_coding	zinc finger protein 222 [Source:HGNC Symbol;Acc:HGNC:13015]	zf-C2H2	22	62	0.649083	1.56006
ENSG00000255325	-1.14733	2.21504	0.0218023	0.554962	AC108136.1	8	122485515	122489815	-	631	lincRNA	novel transcript	-	42	109	3.93349	8.7062
ENSG00000196890	-1.46527	2.76114	0.0219911	0.554962	HIST3H2BB	1	228458107	228460470	+	2364	protein_coding	histone cluster 3 H2B family member b [Source:HGNC Symbol;Acc:HGNC:20514]	-	12	39	0.29998	0.831474
ENSG00000166415	-1.42275	2.68096	0.0220647	0.554962	WDR72	15	53513741	53762878	-	8572	protein_coding	WD repeat domain 72 [Source:HGNC Symbol;Acc:HGNC:26790]	-	13	41	0.0896231	0.241064
ENSG00000249641	-1.42275	2.68096	0.0220647	0.554962	HOXC13-AS	12	53935328	53939643	-	1408	antisense	HOXC13 antisense RNA [Source:HGNC Symbol;Acc:HGNC:43753]	-	13	41	0.545631	1.46762
ENSG00000171790	-1.42275	2.68096	0.0220647	0.554962	SLFNL1	1	41015597	41023237	-	4310	protein_coding	schlafen like 1 [Source:HGNC Symbol;Acc:HGNC:26313]	-	13	41	0.178248	0.479444
ENSG00000283930	-1.41102	2.65926	0.0220737	0.554962	AL117339.5	10	38094368	38360098	+	3955	protein_coding	novel transcript	-	16	50	0.239074	0.63717
ENSG00000010295	1.41717	2.67061	0.0221135	0.554962	IFFO1	12	6538375	6556083	-	5203	protein_coding	intermediate filament family orphan 1 [Source:HGNC Symbol;Acc:HGNC:24970]	-	39	17	0.442965	0.164675
ENSG00000228589	1.12678	2.18371	0.0222026	0.554962	SPCS2P4	1	28095742	28096422	-	681	processed_pseudogene	signal peptidase complex subunit 2 pseudogene 4 [Source:HGNC Symbol;Acc:HGNC:45237]	-	86	46	7.46294	3.40441
ENSG00000229807	-5.72612	52.934	0.0226768	0.554962	XIST	X	73820651	73852723	-	25264	lincRNA	X inactive specific transcript [Source:HGNC Symbol;Acc:HGNC:12810]	-	0	7	0	0.0139646
ENSG00000166292	-5.72612	52.934	0.0226768	0.554962	TMEM100	17	55719627	55732121	-	2906	protein_coding	transmembrane protein 100 [Source:HGNC Symbol;Acc:HGNC:25607]	-	0	7	0	0.121404
ENSG00000196972	5.94853	61.7568	0.0226768	0.554962	SMIM10L2B	X	135094987	135098634	-	2737	protein_coding	small integral membrane protein 10 like 2B [Source:HGNC Symbol;Acc:HGNC:34500]	-	7	0	0.151141	0
ENSG00000109667	-5.72612	52.934	0.0226768	0.554962	SLC2A9	4	9771153	10054936	-	6614	protein_coding	solute carrier family 2 member 9 [Source:HGNC Symbol;Acc:HGNC:13446]	-	0	7	0	0.0533415
ENSG00000068615	5.94853	61.7568	0.0226768	0.554962	REEP1	2	86213993	86338083	-	5846	protein_coding	receptor accessory protein 1 [Source:HGNC Symbol;Acc:HGNC:25786]	-	7	0	0.0707616	0
ENSG00000230445	-5.72612	52.934	0.0226768	0.554962	LRRC37A6P	10	27246350	27259455	-	5625	transcribed_processed_pseudogene	leucine rich repeat containing 37 member A6, pseudogene [Source:HGNC Symbol;Acc:HGNC:33746]	-	0	7	0	0.0627201
ENSG00000130649	5.94853	61.7568	0.0226768	0.554962	CYP2E1	10	133520406	133561220	+	9621	protein_coding	cytochrome P450 family 2 subfamily E member 1 [Source:HGNC Symbol;Acc:HGNC:2631]	-	7	0	0.0429968	0
ENSG00000284934	-5.72612	52.934	0.0226768	0.554962	DIABLO	12	122207662	122227534	-	2351	protein_coding	diablo IAP-binding mitochondrial protein [Source:HGNC Symbol;Acc:HGNC:21528]	-	0	7	0	0.150064
ENSG00000280594	-5.72612	52.934	0.0226768	0.554962	BTG3-AS1	21	17611744	17633199	+	2578	processed_transcript	BTG3 antisense RNA 1 [Source:HGNC Symbol;Acc:HGNC:53145]	-	0	7	0	0.136851
ENSG00000205078	5.94853	61.7568	0.0226768	0.554962	SYCE1L	16	77199397	77213215	+	1244	protein_coding	synaptonemal complex central element protein 1 like [Source:HGNC Symbol;Acc:HGNC:37236]	-	7	0	0.332534	0
ENSG00000278917	-5.72612	52.934	0.0226768	0.554962	AC006213.6	19	43891233	43895411	+	4179	TEC	TEC	-	0	7	0	0.0844223
ENSG00000270761	-5.72612	52.934	0.0226768	0.554962	AL355353.1	6	47477243	47477572	-	330	lincRNA	novel transcript	-	0	7	0	1.06909
ENSG00000125046	-5.72612	52.934	0.0226768	0.554962	SSUH2	3	8619400	8745040	-	6279	protein_coding	ssu-2 homolog (C. elegans) [Source:HGNC Symbol;Acc:HGNC:24809]	-	0	7	0	0.0561874
ENSG00000237118	5.94853	61.7568	0.0226768	0.554962	CYP2F2P	19	40818414	40826772	-	1547	transcribed_processed_pseudogene	cytochrome P450 family 2 subfamily F member 2, pseudogene [Source:HGNC Symbol;Acc:HGNC:18851]	-	7	0	0.267403	0
ENSG00000231948	-5.72612	52.934	0.0226768	0.554962	HS1BP3-IT1	2	20590775	20592548	-	600	sense_intronic	HS1BP3 intronic transcript 1 [Source:HGNC Symbol;Acc:HGNC:41474]	-	0	7	0	0.588001
ENSG00000260625	5.94853	61.7568	0.0226768	0.554962	AC026471.2	16	31508471	31509256	+	655	antisense	novel transcript, antisense to C16orf58	-	7	0	0.631561	0
ENSG00000169896	5.94853	61.7568	0.0226768	0.554962	ITGAM	16	31259967	31332892	+	5688	protein_coding	integrin subunit alpha M [Source:HGNC Symbol;Acc:HGNC:6149]	-	7	0	0.0727272	0
ENSG00000132185	5.94853	61.7568	0.0226768	0.554962	FCRLA	1	161706972	161714352	+	3275	protein_coding	Fc receptor like A [Source:HGNC Symbol;Acc:HGNC:18504]	-	7	0	0.126312	0
ENSG00000198633	-5.72612	52.934	0.0226768	0.554962	ZNF534	19	52429187	52452315	+	3279	protein_coding	zinc finger protein 534 [Source:HGNC Symbol;Acc:HGNC:26337]	zf-C2H2	0	7	0	0.107594
ENSG00000233622	-5.72612	52.934	0.0226768	0.554962	CYP2T1P	19	40808474	40812100	-	2871	transcribed_unitary_pseudogene	cytochrome P450 family 2 subfamily T member 1, pseudogene [Source:HGNC Symbol;Acc:HGNC:18852]	-	0	7	0	0.122884
ENSG00000222043	5.94853	61.7568	0.0226768	0.554962	AC079305.1	2	177264359	177265515	+	499	antisense	novel transcript	-	7	0	0.829003	0
ENSG00000242808	-5.72612	52.934	0.0226768	0.554962	SOX2-OT	3	180989762	181836880	+	31629	sense_overlapping	SOX2 overlapping transcript [Source:HGNC Symbol;Acc:HGNC:20209]	-	0	7	0	0.0111543
ENSG00000235363	5.94853	61.7568	0.0226768	0.554962	SNRPGP10	1	205351247	205351471	+	225	processed_pseudogene	small nuclear ribonucleoprotein polypeptide G pseudogene 10 [Source:HGNC Symbol;Acc:HGNC:39329]	-	7	0	1.83854	0
ENSG00000163576	-5.72612	52.934	0.0226768	0.554962	EFHB	3	19879472	19947025	-	4163	protein_coding	EF-hand domain family member B [Source:HGNC Symbol;Acc:HGNC:26330]	-	0	7	0	0.0847468
ENSG00000233560	-5.72612	52.934	0.0226768	0.554962	KRT8P39	12	68705634	68707066	+	1433	processed_pseudogene	keratin 8 pseudogene 39 [Source:HGNC Symbol;Acc:HGNC:39873]	-	0	7	0	0.246197
ENSG00000272205	-5.72612	52.934	0.0226768	0.554962	AL451050.2	1	167219831	167220512	-	682	lincRNA	novel transcript	-	0	7	0	0.517303
ENSG00000224729	5.94853	61.7568	0.0226768	0.554962	PCOLCE-AS1	7	100589402	100604206	-	2705	antisense	PCOLCE antisense RNA 1 [Source:HGNC Symbol;Acc:HGNC:40430]	-	7	0	0.152929	0
ENSG00000159337	-5.72612	52.934	0.0226768	0.554962	PLA2G4D	15	42067009	42094554	-	5138	protein_coding	phospholipase A2 group IVD [Source:HGNC Symbol;Acc:HGNC:30038]	-	0	7	0	0.068665
ENSG00000140675	5.94853	61.7568	0.0226768	0.554962	SLC5A2	16	31483002	31490860	+	4468	protein_coding	solute carrier family 5 member 2 [Source:HGNC Symbol;Acc:HGNC:11037]	-	7	0	0.0925856	0
ENSG00000227598	5.94853	61.7568	0.0226768	0.554962	Z94721.1	6	166969626	166999065	-	385	bidirectional_promoter_lncRNA	novel transcript	-	7	0	1.07447	0
ENSG00000258957	5.94853	61.7568	0.0226768	0.554962	AL359317.2	14	69183020	69214092	-	2364	lincRNA	novel transcript	-	7	0	0.174988	0
ENSG00000164175	-5.72612	52.934	0.0226768	0.554962	SLC45A2	5	33944616	33984730	-	3267	protein_coding	solute carrier family 45 member 2 [Source:HGNC Symbol;Acc:HGNC:16472]	-	0	7	0	0.107989
ENSG00000234722	-5.72612	52.934	0.0226768	0.554962	LINC01287	7	153355365	153413981	-	4987	lincRNA	long intergenic non-protein coding RNA 1287 [Source:HGNC Symbol;Acc:HGNC:50351]	-	0	7	0	0.0707441
ENSG00000254349	-5.72612	52.934	0.0226768	0.554962	MIR2052HG	8	74599775	74823313	+	2906	lincRNA	MIR2052 host gene [Source:HGNC Symbol;Acc:HGNC:51555]	-	0	7	0	0.121404
ENSG00000250764	-5.72612	52.934	0.0226768	0.554962	AC025178.1	5	32103445	32121941	-	834	antisense	novel transcript	-	0	7	0	0.423023
ENSG00000239884	-5.72612	52.934	0.0226768	0.554962	RN7SL608P	17	2680958	2681236	+	279	misc_RNA	RNA, 7SL, cytoplasmic 608, pseudogene [Source:HGNC Symbol;Acc:HGNC:46624]	-	0	7	0	1.26452
ENSG00000241322	-5.72612	52.934	0.0226768	0.554962	CDRT1	17	15565483	15619512	-	4286	protein_coding	CMT1A duplicated region transcript 1 [Source:HGNC Symbol;Acc:HGNC:14379]	-	0	7	0	0.0823147
ENSG00000273186	-5.72612	52.934	0.0226768	0.554962	AL359091.5	9	128431598	128432006	+	409	sense_intronic	novel transcript, sense intronic to CERCAM	-	0	7	0	0.862594
ENSG00000110375	-5.72612	52.934	0.0226768	0.554962	UPK2	11	118925164	118958559	+	1106	protein_coding	uroplakin 2 [Source:HGNC Symbol;Acc:HGNC:12579]	-	0	7	0	0.318988
ENSG00000260439	-5.72612	52.934	0.0226768	0.554962	LMF1-AS1	16	921033	934495	+	1448	antisense	LMF1 antisense RNA 1 [Source:HGNC Symbol;Acc:HGNC:50469]	-	0	7	0	0.243647
ENSG00000253553	-5.72612	52.934	0.0226768	0.554962	AC090578.1	8	88326836	88887323	+	5465	antisense	novel transcript, antisense to MMP16	-	0	7	0	0.0645564
ENSG00000270689	-5.72612	52.934	0.0226768	0.554962	BUD13P1	11	95143637	95145125	+	1489	processed_pseudogene	BUD13 homolog pseudogene 1 [Source:HGNC Symbol;Acc:HGNC:51560]	-	0	7	0	0.236938
ENSG00000238365	-5.72612	52.934	0.0226768	0.554962	RNU7-57P	1	154338743	154338802	+	60	snRNA	RNA, U7 small nuclear 57 pseudogene [Source:HGNC Symbol;Acc:HGNC:34153]	-	0	7	0	5.88001
ENSG00000261438	-5.72612	52.934	0.0226768	0.554962	AL157394.1	10	89015836	89017059	+	1224	sense_overlapping	novel transcript, overlapping FAS	-	0	7	0	0.288236
ENSG00000257875	5.94853	61.7568	0.0226768	0.554962	AC089998.3	12	82468456	82468948	+	493	processed_pseudogene	F-box and WD repeat domain containing 12 (FBXW12) pseudogene	-	7	0	0.839092	0
ENSG00000103832	-5.72612	52.934	0.0226768	0.554962	GOLGA8UP	15	30791573	30801859	+	1755	unprocessed_pseudogene	golgin A8 family member U, pseudogene [Source:HGNC Symbol;Acc:HGNC:44411]	-	0	7	0	0.201026
ENSG00000263326	-5.72612	52.934	0.0226768	0.554962	AC133552.4	16	25071490	25072727	-	676	unprocessed_pseudogene	thyroid hormone receptor interactor 11 (TRIP11) pseudogene	-	0	7	0	0.521895
ENSG00000201499	-5.72612	52.934	0.0226768	0.554962	RNU6-312P	2	200881715	200881821	-	107	snRNA	RNA, U6 small nuclear 312, pseudogene [Source:HGNC Symbol;Acc:HGNC:47275]	-	0	7	0	3.2972
ENSG00000234147	-5.72612	52.934	0.0226768	0.554962	AL035446.1	6	140845958	140852924	-	453	lincRNA	novel transcript	-	0	7	0	0.77881
ENSG00000270490	5.94853	61.7568	0.0226768	0.554962	AC110048.1	15	66808404	66810560	+	2157	processed_pseudogene	leucine zipper-EF-hand containing transmembrane protein 1 (LETM1) pseudogene	-	7	0	0.191781	0
ENSG00000214973	5.94853	61.7568	0.0226768	0.554962	CHCHD3P3	1	27200834	27201473	-	640	processed_pseudogene	coiled-coil-helix-coiled-coil-helix domain containing 3 pseudogene 3 [Source:HGNC Symbol;Acc:HGNC:44699]	-	7	0	0.646363	0
ENSG00000253620	-5.72612	52.934	0.0226768	0.554962	AC144568.1	8	64091	64320	-	137	processed_pseudogene	family with sequence similarity 41, member C (FAM41C) pseudogene	-	0	7	0	2.57519
ENSG00000270679	-5.72612	52.934	0.0226768	0.554962	AC138473.1	19	44290081	44290911	+	526	processed_pseudogene	mitochondrial ribosomal protein S15 (MRPS15) pseudogene	-	0	7	0	0.670724
ENSG00000206785	-5.72612	52.934	0.0226768	0.554962	SNORA15B-2	7	65760052	65760186	+	135	snoRNA	small nucleolar RNA, H/ACA box 15B-2 [Source:HGNC Symbol;Acc:HGNC:52192]	-	0	7	0	2.61334
ENSG00000256747	-5.72612	52.934	0.0226768	0.554962	AC009511.2	12	27779821	27781067	-	679	antisense	novel transcript	-	0	7	0	0.519589
ENSG00000272699	-5.72612	52.934	0.0226768	0.554962	AC007620.3	3	179405448	179405944	+	497	antisense	novel transcript, antisense to GNB4	-	0	7	0	0.709861
ENSG00000246851	-5.72612	52.934	0.0226768	0.554962	AL157938.3	9	131189910	131194205	-	3084	antisense	novel transcript	-	0	7	0	0.114397
ENSG00000146049	5.94853	61.7568	0.0226768	0.554962	KAAG1	6	24356903	24358284	+	1382	protein_coding	kidney associated antigen 1 [Source:HGNC Symbol;Acc:HGNC:21031]	-	7	0	0.299329	0
ENSG00000252652	-5.72612	52.934	0.0226768	0.554962	RF00019	11	43331261	43331356	+	96	misc_RNA		-	0	7	0	3.67501
ENSG00000230778	5.94853	61.7568	0.0226768	0.554962	ANKRD63	15	40281444	40282586	-	1143	protein_coding	ankyrin repeat domain 63 [Source:HGNC Symbol;Acc:HGNC:40027]	-	7	0	0.361918	0
ENSG00000200403	-5.72612	52.934	0.0226768	0.554962	RNU6-1099P	1	19305076	19305182	-	107	snRNA	RNA, U6 small nuclear 1099, pseudogene [Source:HGNC Symbol;Acc:HGNC:48062]	-	0	7	0	3.2972
ENSG00000236905	-5.72612	52.934	0.0226768	0.554962	AC104333.3	1	212824027	212824505	+	479	processed_pseudogene	ribosomal protein S5 (RPS5) pseudogene	-	0	7	0	0.736536
ENSG00000272416	-5.72612	52.934	0.0226768	0.554962	AC025175.1	5	53880293	53881051	-	759	lincRNA	novel transcript	-	0	7	0	0.464823
ENSG00000235448	-5.72612	52.934	0.0226768	0.554962	LURAP1L-AS1	9	12698554	12814345	-	1720	antisense	LURAP1L antisense RNA 1 [Source:HGNC Symbol;Acc:HGNC:49761]	-	0	7	0	0.205117
ENSG00000252906	-5.72612	52.934	0.0226768	0.554962	SCARNA3	1	175968398	175968540	-	143	scaRNA	small Cajal body-specific RNA 3 [Source:HGNC Symbol;Acc:HGNC:32577]	-	0	7	0	2.46714
ENSG00000240964	-5.72612	52.934	0.0226768	0.554962	RN7SL751P	3	78938009	78938292	-	284	misc_RNA	RNA, 7SL, cytoplasmic 751, pseudogene [Source:HGNC Symbol;Acc:HGNC:46767]	-	0	7	0	1.24226
ENSG00000241185	-5.72612	52.934	0.0226768	0.554962	AC005410.1	17	11998353	12021508	-	1000	transcribed_processed_pseudogene	ribosomal protein L21 pseudogene 122	-	0	7	0	0.352801
ENSG00000268764	-5.72612	52.934	0.0226768	0.554962	AC011465.1	19	38108500	38109533	-	328	antisense	novel transcript, antisense to SIPA1L3	-	0	7	0	1.07561
ENSG00000223583	-5.72612	52.934	0.0226768	0.554962	AL513365.1	1	26454653	26455187	-	535	processed_pseudogene	ribosomal protein L17 (RPL17) pseudogene	-	0	7	0	0.659441
ENSG00000231724	-5.72612	52.934	0.0226768	0.554962	AC112907.1	3	186807692	186818121	+	540	antisense	novel transcript	-	0	7	0	0.653335
ENSG00000254119	-5.72612	52.934	0.0226768	0.554962	AC025524.2	8	61785047	61944180	+	3155	lincRNA	uncharacterized LOC101929628 [Source:NCBI gene;Acc:101929628]	-	0	7	0	0.111823
ENSG00000199787	-5.72612	52.934	0.0226768	0.554962	RF00406	16	30419625	30419759	-	135	snoRNA		-	0	7	0	2.61334
ENSG00000225442	-5.72612	52.934	0.0226768	0.554962	MPRIP-AS1	17	17076038	17077752	-	1058	antisense	MPRIP antisense RNA 1 [Source:HGNC Symbol;Acc:HGNC:41263]	-	0	7	0	0.33346
ENSG00000236542	-5.72612	52.934	0.0226768	0.554962	MED28P7	20	25669857	25670386	-	530	processed_pseudogene	mediator complex subunit 28 pseudogene 7 [Source:HGNC Symbol;Acc:HGNC:45084]	-	0	7	0	0.665662
ENSG00000270141	-5.72612	52.934	0.0226768	0.554962	TERC	3	169764520	169765060	-	541	lincRNA	telomerase RNA component [Source:HGNC Symbol;Acc:HGNC:11727]	-	0	7	0	0.652127
ENSG00000271590	-5.72612	52.934	0.0226768	0.554962	AC108463.3	2	111210995	111212476	-	1482	lincRNA	novel transcript	-	0	7	0	0.238057
ENSG00000278095	5.94853	61.7568	0.0226768	0.554962	AC022509.4	12	26273329	26273900	-	572	antisense	novel transcript, antisense to SSPN	-	7	0	0.723204	0
ENSG00000262873	-5.72612	52.934	0.0226768	0.554962	AC127496.5	17	81017969	81020011	-	935	lincRNA	novel transcript	-	0	7	0	0.377327
ENSG00000248599	-5.72612	52.934	0.0226768	0.554962	FLJ42969	8	101052054	101076251	+	1948	lincRNA	uncharacterized LOC441374 [Source:NCBI gene;Acc:441374]	-	0	7	0	0.181109
ENSG00000226797	-5.72612	52.934	0.0226768	0.554962	AC005828.1	17	63381231	63414312	-	524	antisense	novel transcript, antisense to TANC2	-	0	7	0	0.673284
ENSG00000232693	-5.72612	52.934	0.0226768	0.554962	AC012370.1	2	65373700	65380685	-	530	sense_intronic	novel transcript, sense intronic to SPRED2	-	0	7	0	0.665662
ENSG00000231509	5.94853	61.7568	0.0226768	0.554962	AL162253.1	9	5584490	5588994	+	758	lincRNA	novel transcript	-	7	0	0.545742	0
ENSG00000267515	5.94853	61.7568	0.0226768	0.554962	AP001029.3	18	12450447	12451042	+	596	processed_pseudogene	high mobility group box 3 (HMGB3) pseudogene	-	7	0	0.694081	0
ENSG00000232085	-5.72612	52.934	0.0226768	0.554962	AL606534.2	1	243164638	243169445	+	488	antisense	novel transcript, antisense to CEP170	-	0	7	0	0.722952
ENSG00000227400	-5.72612	52.934	0.0226768	0.554962	AC012501.1	2	153421616	153593288	-	984	sense_overlapping	novel transcript	-	0	7	0	0.358537
ENSG00000231317	-5.72612	52.934	0.0226768	0.554962	AC091812.1	7	55656768	55678490	-	1948	unprocessed_pseudogene	coiled-coil domain containing 144C (CCDC144C) pseudogene	-	0	7	0	0.181109
ENSG00000199846	5.94853	61.7568	0.0226768	0.554962	RNU1-72P	7	129484504	129484656	+	153	snRNA	RNA, U1 small nuclear 72, pseudogene [Source:HGNC Symbol;Acc:HGNC:48414]	-	7	0	2.70374	0
ENSG00000285709	-5.72612	52.934	0.0226768	0.554962	AL592164.2	X	39908309	39914419	+	1330	lincRNA		-	0	7	0	0.265264
ENSG00000255101	-5.72612	52.934	0.0226768	0.554962	AC103843.1	8	42705583	42721946	-	682	antisense	novel transcript	-	0	7	0	0.517303
ENSG00000229019	-5.72612	52.934	0.0226768	0.554962	AL161457.1	9	68426843	68429369	+	905	sense_intronic	novel transcript	-	0	7	0	0.389835
ENSG00000257762	-5.72612	52.934	0.0226768	0.554962	LINC02401	12	103547794	103559815	+	3149	lincRNA	long intergenic non-protein coding RNA 2401 [Source:HGNC Symbol;Acc:HGNC:53328]	-	0	7	0	0.112036
ENSG00000277391	-5.72612	52.934	0.0226768	0.554962	MIR6881	15	74411357	74411432	-	76	miRNA	microRNA 6881 [Source:HGNC Symbol;Acc:HGNC:50098]	-	0	7	0	4.64212
ENSG00000177202	-5.72612	52.934	0.0226768	0.554962	SPACA4	19	48606743	48607714	+	972	protein_coding	sperm acrosome associated 4 [Source:HGNC Symbol;Acc:HGNC:16441]	-	0	7	0	0.362964
ENSG00000268316	-5.72612	52.934	0.0226768	0.554962	AC006272.1	19	51839771	51840945	-	552	lincRNA	novel transcript	-	0	7	0	0.639132
ENSG00000275874	-5.72612	52.934	0.0226768	0.554962	PICSAR	21	44999208	45004727	-	733	lincRNA	P38 inhibited cutaneous squamous cell carcinoma associated lincRNA [Source:HGNC Symbol;Acc:HGNC:19725]	-	0	7	0	0.481311
ENSG00000183793	-1.15921	2.23335	0.0227755	0.554962	NPIPA5	16	15363624	15381047	-	1520	protein_coding	nuclear pore complex interacting protein family member A5 [Source:HGNC Symbol;Acc:HGNC:41980]	-	34	89	1.32189	2.95106
ENSG00000266554	-1.15921	2.23335	0.0227755	0.554962	LINC01443	18	14946267	14974215	+	2842	lincRNA	long intergenic non-protein coding RNA 1443 [Source:HGNC Symbol;Acc:HGNC:50768]	-	34	89	0.70699	1.57833
ENSG00000147408	1.16702	2.24547	0.022901	0.554962	CSGALNACT1	8	19404161	19758029	-	6580	protein_coding	chondroitin sulfate N-acetylgalactosaminyltransferase 1 [Source:HGNC Symbol;Acc:HGNC:24290]	-	75	39	0.673587	0.298724
ENSG00000244586	1.16702	2.24547	0.022901	0.554962	WNT5A-AS1	3	55487699	55488308	+	500	antisense	WNT5A antisense RNA 1 [Source:HGNC Symbol;Acc:HGNC:40616]	-	75	39	8.86441	3.93121
ENSG00000140961	1.00128	2.00177	0.022962	0.554962	OSGIN1	16	83948282	83966332	+	3460	protein_coding	oxidative stress induced growth inhibitor 1 [Source:HGNC Symbol;Acc:HGNC:30093]	-	291	170	4.97022	2.47631
ENSG00000125845	2.1889	4.55959	0.0230709	0.554962	BMP2	20	6767664	6780280	+	3601	protein_coding	bone morphogenetic protein 2 [Source:HGNC Symbol;Acc:HGNC:1069]	-	16	4	0.262576	0.0559846
ENSG00000206557	-1.91335	3.76684	0.0230709	0.554962	TRIM71	3	32818018	32897826	+	8685	protein_coding	tripartite motif containing 71 [Source:HGNC Symbol;Acc:HGNC:32669]	-	4	18	0.0272175	0.104456
ENSG00000179455	2.1889	4.55959	0.0230709	0.554962	MKRN3	15	23565674	23630075	+	5735	protein_coding	makorin ring finger protein 3 [Source:HGNC Symbol;Acc:HGNC:7114]	-	16	4	0.164871	0.0351526
ENSG00000198237	1.87641	3.67161	0.0230709	0.554962	AC131392.1	5	69875271	69920867	+	633	unprocessed_pseudogene	glucuronidase, beta (GUSB) pseudogene	-	16	5	1.49374	0.398105
ENSG00000198569	1.87641	3.67161	0.0230709	0.554962	SLC34A3	9	137230757	137236554	+	2303	protein_coding	solute carrier family 34 member 3 [Source:HGNC Symbol;Acc:HGNC:20305]	-	16	5	0.410568	0.109423
ENSG00000172575	-1.91335	3.76684	0.0230709	0.554962	RASGRP1	15	38488103	38565575	-	6097	protein_coding	RAS guanyl releasing protein 1 [Source:HGNC Symbol;Acc:HGNC:9878]	-	4	18	0.0387706	0.148795
ENSG00000169627	-1.91335	3.76684	0.0230709	0.554962	BOLA2B	16	30192934	30194306	-	1365	protein_coding	bolA family member 2B [Source:HGNC Symbol;Acc:HGNC:32479]	-	4	18	0.173175	0.664617
ENSG00000139567	1.87641	3.67161	0.0230709	0.554962	ACVRL1	12	51906908	51923361	+	5040	protein_coding	activin A receptor like type 1 [Source:HGNC Symbol;Acc:HGNC:175]	-	16	5	0.187607	0.0500001
ENSG00000204420	-1.91335	3.76684	0.0230709	0.554962	MPIG6B	6	31718594	31726714	+	2937	protein_coding	megakaryocyte and platelet inhibitory receptor G6b [Source:HGNC Symbol;Acc:HGNC:13937]	-	4	18	0.0804849	0.308887
ENSG00000200090	2.1889	4.55959	0.0230709	0.554962	RF00019	11	47726894	47726992	-	99	misc_RNA		-	16	4	9.55088	2.03637
ENSG00000182901	1.87641	3.67161	0.0230709	0.554962	RGS7	1	240775515	241357230	-	2575	protein_coding	regulator of G protein signaling 7 [Source:HGNC Symbol;Acc:HGNC:10003]	-	16	5	0.367199	0.0978643
ENSG00000260388	-1.91335	3.76684	0.0230709	0.554962	LINC00562	13	47930153	47932622	-	2470	lincRNA	long intergenic non-protein coding RNA 562 [Source:HGNC Symbol;Acc:HGNC:43706]	-	4	18	0.0957021	0.367288
ENSG00000181284	1.08214	2.11717	0.0231267	0.555731	TMEM102	17	7435443	7437679	+	2129	protein_coding	transmembrane protein 102 [Source:HGNC Symbol;Acc:HGNC:26722]	-	125	69	3.46971	1.63345
ENSG00000171246	1.04231	2.05953	0.0231657	0.556095	NPTX1	17	80467148	80477843	-	6703	protein_coding	neuronal pentraxin 1 [Source:HGNC Symbol;Acc:HGNC:7952]	-	148	84	1.30482	0.631599
ENSG00000233559	-1.14179	2.20654	0.023763	0.569261	LINC00513	7	130853720	130928649	+	1616	lincRNA	long intergenic non-protein coding RNA 513 [Source:HGNC Symbol;Acc:HGNC:43566]	-	41	106	1.49934	3.30595
ENSG00000280719	-1.18523	2.27399	0.0238961	0.571861	PCAT5	10	35778302	35800920	+	3550	lincRNA	prostate cancer associated transcript 5 [Source:HGNC Symbol;Acc:HGNC:48665]	-	27	72	0.449463	1.0222
ENSG00000236144	-1.04207	2.05918	0.0241911	0.577257	TMEM147-AS1	19	35540738	35546029	-	4859	antisense	TMEM147 antisense RNA 1 [Source:HGNC Symbol;Acc:HGNC:51273]	-	73	176	0.88784	1.82556
ENSG00000111863	-1.1153	2.16639	0.024204	0.577257	ADTRP	6	11712054	11807046	-	4150	protein_coding	androgen dependent TFPI regulating protein [Source:HGNC Symbol;Acc:HGNC:21214]	-	39	99	0.555361	1.20232
ENSG00000117525	-1.21346	2.31894	0.0242206	0.577257	F3	1	94529225	94541800	-	2875	protein_coding	coagulation factor III, tissue factor [Source:HGNC Symbol;Acc:HGNC:3541]	-	25	68	0.513879	1.19207
ENSG00000223891	-1.03265	2.04578	0.0244457	0.581432	OSER1-DT	20	44210960	44226027	+	2186	lincRNA	OSER1 divergent transcript [Source:HGNC Symbol;Acc:HGNC:48585]	-	81	194	2.18974	4.47284
ENSG00000224687	1.78848	3.45451	0.0245106	0.58179	RASAL2-AS1	1	178091508	178093984	-	2356	lincRNA	RASAL2 antisense RNA 1 [Source:HGNC Symbol;Acc:HGNC:44170]	-	18	6	0.451498	0.128353
ENSG00000259015	1.78848	3.45451	0.0245106	0.58179	AL442663.4	14	72960595	72961993	+	289	processed_pseudogene	chromosome 17 open reading frame 98 (C17orf98) pseudogene	-	18	6	3.68072	1.04637
ENSG00000058866	-1.0998	2.14325	0.0247643	0.586618	DGKG	3	186105668	186362237	-	10978	protein_coding	diacylglycerol kinase gamma [Source:HGNC Symbol;Acc:HGNC:2853]	-	47	118	0.253007	0.541739
ENSG00000160050	1.14556	2.21232	0.0254355	0.596188	CCDC28B	1	32200386	32205387	+	2818	protein_coding	coiled-coil domain containing 28B [Source:HGNC Symbol;Acc:HGNC:28163]	-	72	38	1.50991	0.679632
ENSG00000135406	-1.88708	3.69887	0.0254753	0.596188	PRPH	12	49293252	49298686	+	4353	protein_coding	peripherin [Source:HGNC Symbol;Acc:HGNC:9461]	-	5	22	0.0678797	0.254721
ENSG00000255062	-1.95083	3.86597	0.0254753	0.596188	AP001318.2	11	126294298	126304318	-	629	antisense	novel transcript, antisense to DCPS and TIRAP	-	5	23	0.469762	1.84293
ENSG00000274615	1.72171	3.29827	0.0254753	0.596188	AC233968.1	17	38078262	38124770	+	1300	unprocessed_pseudogene	aminopeptidase puromycin sensitive pseudogene [Source:NCBI gene;Acc:440434]	-	20	7	0.90917	0.271385
ENSG00000229994	-1.95083	3.86597	0.0254753	0.596188	RPL5P4	1	35350722	35351607	+	886	processed_pseudogene	ribosomal protein L5 pseudogene 4 [Source:HGNC Symbol;Acc:HGNC:36095]	-	5	23	0.333499	1.30836
ENSG00000283236	-1.88708	3.69887	0.0254753	0.596188	AC074141.1	19	51860242	51863236	-	2995	transcribed_unprocessed_pseudogene	novel zinc finger protein pseudogene	-	5	22	0.0986579	0.370218
ENSG00000260669	1.72171	3.29827	0.0254753	0.596188	AL096870.2	14	24209646	24215987	-	3045	processed_transcript	novel transcript	-	20	7	0.388152	0.115862
ENSG00000237254	-1.95083	3.86597	0.0254753	0.596188	TRBV30	7	142812586	142813399	-	447	TR_V_gene	T cell receptor beta variable 30 (gene/pseudogene) [Source:HGNC Symbol;Acc:HGNC:12214]	-	5	23	0.66103	2.59329
ENSG00000177138	-1.88708	3.69887	0.0254753	0.596188	FAM9B	X	9024232	9164639	-	6843	protein_coding	family with sequence similarity 9 member B [Source:HGNC Symbol;Acc:HGNC:18404]	-	5	22	0.0431799	0.162035
ENSG00000105711	1.00823	2.01144	0.0255161	0.596543	SCN1B	19	35030466	35040449	+	7993	protein_coding	sodium voltage-gated channel beta subunit 1 [Source:HGNC Symbol;Acc:HGNC:10586]	-	203	118	1.50088	0.744053
ENSG00000249867	-1.35229	2.55317	0.0258645	0.603479	AC090833.1	11	28702615	29063821	+	1512	lincRNA	uncharacterized LOC105376603 [Source:NCBI gene;Acc:105376603]	-	16	48	0.625355	1.6
ENSG00000205155	1.04515	2.06358	0.0259866	0.603745	PSENEN	19	35745114	35747519	+	1845	protein_coding	presenilin enhancer, gamma-secretase subunit [Source:HGNC Symbol;Acc:HGNC:30100]	-	143	81	4.58035	2.21269
ENSG00000187624	1.60247	3.03663	0.0261053	0.603745	C17orf97	17	410327	431062	+	2710	protein_coding	chromosome 17 open reading frame 97 [Source:HGNC Symbol;Acc:HGNC:33800]	-	21	8	0.45794	0.148783
ENSG00000106069	-1.81284	3.51334	0.0261053	0.603745	CHN2	7	29146569	29514328	+	8801	protein_coding	chimerin 2 [Source:HGNC Symbol;Acc:HGNC:1944]	-	6	25	0.0402882	0.143166
ENSG00000259321	-1.81284	3.51334	0.0261053	0.603745	AL136295.2	14	24139445	24140444	+	747	lincRNA	novel transcript	-	6	25	0.474667	1.68675
ENSG00000166473	-1.81284	3.51334	0.0261053	0.603745	PKD1L2	16	81100875	81220370	-	18637	polymorphic_pseudogene	polycystin 1 like 2 (gene/pseudogene) [Source:HGNC Symbol;Acc:HGNC:21715]	-	6	25	0.0190254	0.0676076
ENSG00000136531	-1.05945	2.08414	0.0261352	0.603745	SCN2A	2	165194993	165392310	+	23695	protein_coding	sodium voltage-gated channel alpha subunit 2 [Source:HGNC Symbol;Acc:HGNC:10588]	-	59	144	0.147148	0.306293
ENSG00000233175	-1.31955	2.49588	0.0262297	0.603745	AC008105.1	17	45238028	45241734	-	2293	antisense	uncharacterized LOC107985040 [Source:NCBI gene;Acc:107985040]	-	15	44	0.386586	0.967119
ENSG00000260942	-1.07601	2.10819	0.0262816	0.603745	CAPN10-DT	2	240582700	240586699	-	4000	antisense	CAPN10 divergent transcript [Source:HGNC Symbol;Acc:HGNC:48839]	-	49	121	0.723927	1.5246
ENSG00000225975	-1.35139	2.55159	0.0263988	0.603745	LINC01534	19	36685440	36687449	-	1138	lincRNA	long intergenic non-protein coding RNA 1534 [Source:HGNC Symbol;Acc:HGNC:51281]	-	14	42	0.727017	1.86011
ENSG00000183208	-1.7048	3.25983	0.0264977	0.603745	GDPGP1	15	90233808	90245811	+	5778	protein_coding	GDP-D-glucose phosphorylase 1 [Source:HGNC Symbol;Acc:HGNC:34360]	-	7	27	0.0715944	0.235515
ENSG00000176054	-1.7048	3.25983	0.0264977	0.603745	RPL23P2	21	28997613	28998033	-	421	processed_pseudogene	ribosomal protein L23 pseudogene 2 [Source:HGNC Symbol;Acc:HGNC:10324]	-	7	27	0.982595	3.23231
ENSG00000224292	1.56577	2.96035	0.0264977	0.603745	AF196972.1	X	48506523	48508838	-	653	antisense	uncharacterized LOC101927635 [Source:NCBI gene;Acc:101927635]	-	23	9	2.08148	0.694642
ENSG00000265107	1.56577	2.96035	0.0264977	0.603745	GJA5	1	147756199	147773362	-	3292	protein_coding	gap junction protein alpha 5 [Source:HGNC Symbol;Acc:HGNC:4279]	-	23	9	0.412883	0.137789
ENSG00000253982	1.10724	2.15433	0.0265988	0.603745	AC100810.1	8	1761990	1764502	-	1322	antisense	uncharacterized LOC101927752 [Source:NCBI gene;Acc:101927752]	-	83	45	3.71027	1.71559
ENSG00000125122	-1.42792	2.69059	0.0266824	0.603745	LRRC29	16	67207139	67227048	-	2807	protein_coding	leucine rich repeat containing 29 [Source:HGNC Symbol;Acc:HGNC:13605]	-	12	38	0.252637	0.682296
ENSG00000231154	-1.61768	3.0688	0.02672	0.603745	MORF4L2-AS1	X	103687284	103691772	+	2086	antisense	MORF4L2 antisense RNA 1 [Source:HGNC Symbol;Acc:HGNC:27991]	-	8	29	0.226639	0.700673
ENSG00000258515	-1.61768	3.0688	0.02672	0.603745	AL355075.2	14	20451305	20451918	+	478	antisense	novel transcript, antisense to OSGEP	-	8	29	0.989056	3.05775
ENSG00000187372	-1.434	2.70195	0.02678	0.603745	PCDHB13	5	141213919	141218979	+	5061	protein_coding	protocadherin beta 13 [Source:HGNC Symbol;Acc:HGNC:8684]	-	11	35	0.128444	0.348548
ENSG00000196421	-1.434	2.70195	0.02678	0.603745	C20orf204	20	64034344	64039962	+	5480	protein_coding	chromosome 20 open reading frame 204 [Source:HGNC Symbol;Acc:HGNC:27655]	-	11	35	0.118623	0.321899
ENSG00000236908	-1.434	2.70195	0.02678	0.603745	AC005865.1	12	3318718	3325343	+	3004	lincRNA	novel transcript	-	11	35	0.216397	0.587218
ENSG00000268119	-1.54581	2.91969	0.0268201	0.603745	AC010615.2	19	21444241	21463908	-	5146	processed_transcript	uncharacterized LOC105372321 [Source:NCBI gene;Acc:105372321]	-	9	31	0.103355	0.303615
ENSG00000085662	-1.48545	2.80005	0.0268319	0.603745	AKR1B1	7	134442350	134459284	-	3660	protein_coding	aldo-keto reductase family 1 member B [Source:HGNC Symbol;Acc:HGNC:381]	-	10	33	0.161465	0.454427
ENSG00000134716	-1.48545	2.80005	0.0268319	0.603745	CYP2J2	1	59893308	59926790	-	2990	protein_coding	cytochrome P450 family 2 subfamily J member 2 [Source:HGNC Symbol;Acc:HGNC:2634]	-	10	33	0.197646	0.556255
ENSG00000106526	-1.48545	2.80005	0.0268319	0.603745	ACTR3C	7	150243916	150323725	-	6460	protein_coding	ARP3 actin related protein 3 homolog C [Source:HGNC Symbol;Acc:HGNC:37282]	-	10	33	0.09148	0.257462
ENSG00000237276	1.48899	2.80693	0.0268319	0.603745	ANO7L1	1	16215909	16228027	-	1990	transcribed_unprocessed_pseudogene	anoctamin 7 like 1 [Source:HGNC Symbol;Acc:HGNC:32248]	-	29	12	0.861199	0.30392
ENSG00000196159	1.01946	2.02716	0.0269623	0.603745	FAT4	4	125316399	125492932	+	16439	protein_coding	FAT atypical cadherin 4 [Source:HGNC Symbol;Acc:HGNC:23109]	-	163	94	0.585964	0.288193
ENSG00000198785	2.60674	6.09125	0.0270427	0.603745	GRIN3A	9	101569353	101738580	-	8121	protein_coding	glutamate ionotropic receptor NMDA type subunit 3A [Source:HGNC Symbol;Acc:HGNC:16767]	-	11	2	0.0800464	0.0124123
ENSG00000164002	-2.40815	5.30794	0.0270427	0.603745	EXO5	1	40508741	40516556	+	3092	protein_coding	exonuclease 5 [Source:HGNC Symbol;Acc:HGNC:26115]	-	2	13	0.0382251	0.211902
ENSG00000279611	2.60674	6.09125	0.0270427	0.603745	AC012313.10	19	58350795	58351720	+	926	TEC	novel transcript	-	11	2	0.702005	0.108856
ENSG00000086717	2.60674	6.09125	0.0270427	0.603745	PPEF1	X	18675909	18827921	+	3513	protein_coding	protein phosphatase with EF-hand domain 1 [Source:HGNC Symbol;Acc:HGNC:9243]	-	11	2	0.185043	0.0286935
ENSG00000205482	2.60674	6.09125	0.0270427	0.603745	SPDYE18	7	77052785	77060512	-	1050	unprocessed_pseudogene	speedy/RINGO cell cycle regulator family member E18 [Source:HGNC Symbol;Acc:HGNC:51514]	-	11	2	0.619102	0.0960002
ENSG00000153446	-2.40815	5.30794	0.0270427	0.603745	C16orf89	16	5044122	5066110	-	2067	protein_coding	chromosome 16 open reading frame 89 [Source:HGNC Symbol;Acc:HGNC:28687]	-	2	13	0.0571805	0.316982
ENSG00000164309	2.60674	6.09125	0.0270427	0.603745	CMYA5	5	79689877	79800240	+	14179	protein_coding	cardiomyopathy associated 5 [Source:HGNC Symbol;Acc:HGNC:14305]	-	11	2	0.0458464	0.00710912
ENSG00000259514	-2.40815	5.30794	0.0270427	0.603745	AC027243.1	15	76339609	76342063	-	758	antisense	novel transcript, antisense to ISL2	-	2	13	0.155926	0.864382
ENSG00000237836	2.60674	6.09125	0.0270427	0.603745	PHKA2-AS1	X	18890296	18894497	+	930	antisense	PHKA2 antisense RNA 1 [Source:HGNC Symbol;Acc:HGNC:44110]	-	11	2	0.698986	0.108387
ENSG00000285730	-2.40815	5.30794	0.0270427	0.603745	Z94721.3	6	166995735	166999511	-	1002	bidirectional_promoter_lncRNA	novel transcript	-	2	13	0.117956	0.653894
ENSG00000214273	-2.40815	5.30794	0.0270427	0.603745	AGGF1P1	4	190041342	190043414	+	2073	processed_pseudogene	angiogenic factor with G-patch and FHA domains 1 pseudogene 1 [Source:HGNC Symbol;Acc:HGNC:38051]	-	2	13	0.057015	0.316064
ENSG00000285602	-2.40815	5.30794	0.0270427	0.603745	AC097625.1	X	15561047	15675608	-	3666	protein_coding	novel protein	-	2	13	0.0322401	0.178724
ENSG00000244682	2.60674	6.09125	0.0270427	0.603745	FCGR2C	1	161581339	161605662	+	3580	polymorphic_pseudogene	Fc fragment of IgG receptor IIc (gene/pseudogene) [Source:HGNC Symbol;Acc:HGNC:15626]	-	11	2	0.18158	0.0281565
ENSG00000244268	-2.40815	5.30794	0.0270427	0.603745	AC117394.2	3	153156511	153161775	-	323	antisense	novel transcript	-	2	13	0.36592	2.02849
ENSG00000248734	-2.40815	5.30794	0.0270427	0.603745	AC008906.1	5	96784777	96785999	+	1001	antisense	novel transcript	-	2	13	0.118074	0.654547
ENSG00000249459	1.15137	2.22124	0.0270451	0.603745	ZNF286B	17	18658429	18682262	-	5884	protein_coding	zinc finger protein 286B [Source:HGNC Symbol;Acc:HGNC:33241]	zf-C2H2	59	31	0.592568	0.265534
ENSG00000180176	-1.08718	2.12459	0.0270674	0.603745	TH	11	2163929	2171877	-	3243	protein_coding	tyrosine hydroxylase [Source:HGNC Symbol;Acc:HGNC:11782]	-	45	112	0.820019	1.74061
ENSG00000196437	-1.00216	2.003	0.0272339	0.606299	ZNF569	19	37411155	37469275	-	5016	protein_coding	zinc finger protein 569 [Source:HGNC Symbol;Acc:HGNC:24737]	zf-C2H2	87	204	1.02499	2.04977
ENSG00000166529	1.04887	2.06891	0.0275796	0.612004	ZSCAN21	7	100049774	100065038	+	2140	protein_coding	zinc finger and SCAN domain containing 21 [Source:HGNC Symbol;Acc:HGNC:13104]	zf-C2H2	108	61	2.98242	1.43664
ENSG00000130940	1.2224	2.33335	0.0275952	0.612004	CASZ1	1	10636604	10796650	-	11336	protein_coding	castor zinc finger 1 [Source:HGNC Symbol;Acc:HGNC:26002]	Others	56	28	0.291935	0.124489
ENSG00000236255	-1.22323	2.33468	0.0278877	0.617316	AC009404.1	2	117833937	117841658	+	4058	lincRNA	novel transcript	-	23	63	0.334946	0.782456
ENSG00000168517	1.12542	2.18165	0.0280885	0.619409	HEXIM2	17	45160700	45170040	+	2038	protein_coding	hexamethylene bisacetamide inducible 2 [Source:HGNC Symbol;Acc:HGNC:28591]	-	71	38	2.05879	0.939747
ENSG00000226259	-1.04776	2.06732	0.0281757	0.620722	GTF2H2B	5	70415352	70448015	+	3979	transcribed_unprocessed_pseudogene	general transcription factor IIH subunit 2B (pseudogene) [Source:HGNC Symbol;Acc:HGNC:31393]	-	57	138	0.846563	1.74798
ENSG00000151702	1.08221	2.11728	0.0282261	0.620722	FLI1	11	128686535	128813267	+	8172	protein_coding	Fli-1 proto-oncogene, ETS transcription factor [Source:HGNC Symbol;Acc:HGNC:3749]	ETS	87	48	0.629143	0.296036
ENSG00000231770	-1.06405	2.09079	0.028228	0.620722	TMEM44-AS1	3	194584011	194590260	+	1119	antisense	TMEM44 antisense RNA 1 [Source:HGNC Symbol;Acc:HGNC:44272]	-	49	120	2.58776	5.40484
ENSG00000105227	1.01002	2.01394	0.0287242	0.62926	PRX	19	40393768	40413366	-	5767	protein_coding	periaxin [Source:HGNC Symbol;Acc:HGNC:13797]	-	143	83	1.46536	0.72537
ENSG00000162755	-1.08589	2.12269	0.0287567	0.629381	KLHDC9	1	161098361	161100346	+	1720	protein_coding	kelch domain containing 9 [Source:HGNC Symbol;Acc:HGNC:28489]	-	39	97	1.33997	2.84233
ENSG00000272655	-1.06836	2.09705	0.0289495	0.633006	POLR2J4	7	44013562	44019170	-	1422	transcribed_unprocessed_pseudogene	RNA polymerase II subunit J4, pseudogene [Source:HGNC Symbol;Acc:HGNC:28195]	-	46	113	1.91169	4.00507
ENSG00000268592	1.13845	2.20144	0.028989	0.633275	RAET1E-AS1	6	149863494	149919507	+	1210	antisense	RAET1E antisense RNA 1 [Source:NCBI gene;Acc:100652739]	-	66	35	3.22342	1.45785
ENSG00000173013	1.22155	2.33196	0.0291851	0.636962	CCDC96	4	7040849	7042939	-	2091	protein_coding	coiled-coil domain containing 96 [Source:HGNC Symbol;Acc:HGNC:26900]	-	46	23	1.30006	0.554377
ENSG00000276529	1.03875	2.05444	0.0292823	0.638485	AP001505.1	21	44978832	44979274	+	443	lincRNA	novel transcript	-	109	62	14.5406	7.05374
ENSG00000224321	-1.29868	2.46003	0.0295429	0.642965	RPL12P14	1	15792796	15793285	+	490	processed_pseudogene	ribosomal protein L12 pseudogene 14 [Source:HGNC Symbol;Acc:HGNC:36495]	-	18	52	2.17088	5.34858
ENSG00000153234	1.25366	2.38446	0.0295429	0.642965	NR4A2	2	156324432	156342348	-	3967	protein_coding	nuclear receptor subfamily 4 group A member 2 [Source:HGNC Symbol;Acc:HGNC:7981]	NGFIB-like	45	22	0.670361	0.279507
ENSG00000240661	-1.10903	2.157	0.0296398	0.644473	AC063952.1	3	120349449	120423826	+	4265	transcribed_unitary_pseudogene	novel V-set domain-containing pseudogene	-	36	91	0.498818	1.07536
ENSG00000285906	-1.00642	2.00891	0.0300678	0.650236	AC083855.2	3	11193439	11225877	-	996	antisense		-	71	167	4.21267	8.45062
ENSG00000274750	-1.04157	2.05847	0.0302437	0.650236	HIST1H3E	6	26224199	26227473	+	2679	protein_coding	histone cluster 1 H3 family member e [Source:HGNC Symbol;Acc:HGNC:4769]	-	56	135	1.2353	2.53976
ENSG00000125775	-2.0541	4.15284	0.0303481	0.650236	SDCBP2	20	1309909	1329239	-	2653	protein_coding	syndecan binding protein 2 [Source:HGNC Symbol;Acc:HGNC:15756]	-	3	15	0.0668256	0.284961
ENSG00000204624	-2.0541	4.15284	0.0303481	0.650236	DISP3	1	11479166	11537584	+	6142	protein_coding	dispatched RND transporter family member 3 [Source:HGNC Symbol;Acc:HGNC:29251]	-	3	15	0.0288649	0.123087
ENSG00000151632	2.29117	4.89452	0.0303481	0.650236	AKR1C2	10	4987400	5018031	-	6461	protein_coding	aldo-keto reductase family 1 member C2 [Source:HGNC Symbol;Acc:HGNC:385]	-	13	3	0.118906	0.023402
ENSG00000244468	-2.0541	4.15284	0.0303481	0.650236	AC093001.1	3	149284782	149333653	+	551	antisense	novel transcript	-	3	15	0.321757	1.37205
ENSG00000279491	-2.0541	4.15284	0.0303481	0.650236	AP003733.4	11	61967794	61969490	+	1697	TEC	uncharacterized LOC399900 [Source:NCBI gene;Acc:399900]	-	3	15	0.104472	0.445493
ENSG00000271751	-2.0541	4.15284	0.0303481	0.650236	AP003392.5	11	119065263	119065677	-	415	lincRNA	novel transcript	-	3	15	0.427201	1.82169
ENSG00000222881	-2.0541	4.15284	0.0303481	0.650236	RF00019	17	40391232	40391338	-	107	misc_RNA		-	3	15	1.6569	7.06544
ENSG00000241886	2.29117	4.89452	0.0303481	0.650236	AC112496.1	X	30698207	30721932	+	562	sense_intronic	novel transcript, sense intronic to GK	-	13	3	1.36699	0.26904
ENSG00000237352	-2.0541	4.15284	0.0303481	0.650236	LINC01358	1	58933643	59240555	+	6730	lincRNA	long intergenic non-protein coding RNA 1358 [Source:HGNC Symbol;Acc:HGNC:50589]	-	3	15	0.026343	0.112333
ENSG00000171533	1.06901	2.098	0.0303512	0.650236	MAP6	11	75586918	75669120	-	6433	protein_coding	microtubule associated protein 6 [Source:HGNC Symbol;Acc:HGNC:6868]	-	88	49	0.808403	0.383896
ENSG00000121743	1.01174	2.01634	0.0307155	0.654631	GJA3	13	20138255	20161049	-	5211	protein_coding	gap junction protein alpha 3 [Source:HGNC Symbol;Acc:HGNC:4277]	-	138	80	1.56501	0.77375
ENSG00000169246	-1.28648	2.43933	0.0311037	0.654631	NPIPB3	16	21402237	21448567	-	4717	protein_coding	nuclear pore complex interacting protein family member B3 [Source:HGNC Symbol;Acc:HGNC:28989]	-	15	43	0.187925	0.459446
ENSG00000134198	-1.28648	2.43933	0.0311037	0.654631	TSPAN2	1	115048011	115089500	-	3410	protein_coding	tetraspanin 2 [Source:HGNC Symbol;Acc:HGNC:20659]	-	15	43	0.259953	0.635544
ENSG00000213085	1.25962	2.39432	0.0311037	0.654631	CFAP45	1	159872364	159900163	-	2625	protein_coding	cilia and flagella associated protein 45 [Source:HGNC Symbol;Acc:HGNC:17229]	-	37	18	0.832973	0.345601
ENSG00000234817	-1.28648	2.43933	0.0311037	0.654631	AL136309.2	6	4136072	4157385	+	2277	lincRNA	uncharacterized LOC100507506 [Source:NCBI gene;Acc:100507506]	-	15	43	0.389302	0.951781
ENSG00000180999	-1.31674	2.49103	0.0315204	0.654631	C1orf105	1	172420688	172468831	+	1725	protein_coding	chromosome 1 open reading frame 105 [Source:HGNC Symbol;Acc:HGNC:29591]	-	14	41	0.47962	1.19792
ENSG00000239462	-1.31674	2.49103	0.0315204	0.654631	AC091212.1	3	98902424	99018562	+	395	antisense	uncharacterized LOC105374002 [Source:NCBI gene;Acc:105374002]	-	14	41	2.09454	5.2314
ENSG00000259078	-1.31674	2.49103	0.0315204	0.654631	PTBP1P	14	65279267	65281166	+	1601	processed_pseudogene	polypyrimidine tract binding protein 1 pseudogene [Source:HGNC Symbol;Acc:HGNC:20030]	-	14	41	0.516768	1.2907
ENSG00000205763	1.19535	2.29	0.0316557	0.654631	RP9P	7	32916815	32943176	-	1433	transcribed_unprocessed_pseudogene	RP9 pseudogene [Source:HGNC Symbol;Acc:HGNC:33969]	-	53	27	2.18569	0.949618
ENSG00000076344	-1.35084	2.55061	0.0319423	0.654631	RGS11	16	268301	275980	-	4798	protein_coding	regulator of G protein signaling 11 [Source:HGNC Symbol;Acc:HGNC:9993]	-	13	39	0.160119	0.409672
ENSG00000280537	-1.35084	2.55061	0.0319423	0.654631	AC068946.1	2	219075329	219170827	-	4650	protein_coding	novel protein, SLC23A3-NHEJ1 readthrough	-	13	39	0.165215	0.422711
ENSG00000137752	-1.35084	2.55061	0.0319423	0.654631	CASP1	11	105025443	105035250	-	3698	protein_coding	caspase 1 [Source:HGNC Symbol;Acc:HGNC:1499]	-	13	39	0.207747	0.531532
ENSG00000178826	-1.1926	2.28565	0.0321187	0.654631	TMEM139	7	143279957	143288048	+	2564	protein_coding	transmembrane protein 139 [Source:HGNC Symbol;Acc:HGNC:22058]	-	22	59	0.507065	1.15975
ENSG00000183508	1.11646	2.16814	0.0322285	0.654631	TENT5C	1	117605934	117628372	+	5751	protein_coding	terminal nucleotidyltransferase 5C [Source:HGNC Symbol;Acc:HGNC:24712]	-	65	35	0.667926	0.30673
ENSG00000204410	-1.03497	2.04907	0.0322289	0.654631	MSH5	6	31739948	31762834	+	6234	protein_coding	mutS homolog 5 [Source:HGNC Symbol;Acc:HGNC:7328]	-	50	120	0.473982	0.970166
ENSG00000213401	2.09648	4.27665	0.0322922	0.654631	MAGEA12	X	152733779	152737669	+	1943	protein_coding	MAGE family member A12 [Source:HGNC Symbol;Acc:HGNC:6799]	-	15	4	0.456223	0.103757
ENSG00000071073	-1.83152	3.55913	0.0322922	0.654631	MGAT4A	2	98619106	98731126	-	9630	protein_coding	alpha-1,3-mannosyl-glycoprotein 4-beta-N-acetylglucosaminyltransferase A [Source:HGNC Symbol;Acc:HGNC:7047]	-	4	17	0.0245467	0.0889722
ENSG00000272323	-1.83152	3.55913	0.0322922	0.654631	AC026801.2	5	34837549	34839278	-	1565	antisense	uncharacterized LOC101929704 [Source:NCBI gene;Acc:101929704]	-	4	17	0.151044	0.547477
ENSG00000170382	-1.83152	3.55913	0.0322922	0.654631	LRRN2	1	204617170	204685733	-	5681	protein_coding	leucine rich repeat neuronal 2 [Source:HGNC Symbol;Acc:HGNC:16914]	-	4	17	0.0416096	0.150819
ENSG00000122824	-1.83152	3.55913	0.0322922	0.654631	NUDT10	X	51332231	51337525	+	2054	protein_coding	nudix hydrolase 10 [Source:HGNC Symbol;Acc:HGNC:17621]	-	4	17	0.115085	0.417138
ENSG00000273759	2.09648	4.27665	0.0322922	0.654631	AL117379.1	20	62928621	62929297	-	677	lincRNA	novel transcript	-	15	4	1.30937	0.297785
ENSG00000271040	1.78399	3.44378	0.0322922	0.654631	AL390955.2	6	157323964	157324477	+	514	lincRNA	novel transcript	-	15	5	1.72459	0.490273
ENSG00000164265	1.78399	3.44378	0.0322922	0.654631	SCGB3A2	5	147870682	147882191	+	1075	protein_coding	secretoglobin family 3A member 2 [Source:HGNC Symbol;Acc:HGNC:18391]	-	15	5	0.824596	0.234419
ENSG00000183426	-1.15284	2.22351	0.0326753	0.654631	NPIPA1	16	14922802	14952060	+	7277	protein_coding	nuclear pore complex interacting protein family member A1 [Source:HGNC Symbol;Acc:HGNC:7909]	-	28	73	0.227386	0.505594
ENSG00000136149	1.11311	2.16312	0.0326753	0.654631	RPL13AP25	13	54440704	54441315	-	612	processed_pseudogene	ribosomal protein L13a pseudogene 25 [Source:HGNC Symbol;Acc:HGNC:36981]	-	63	34	6.08342	2.80001
ENSG00000273802	-1.01337	2.01862	0.0329462	0.654631	HIST1H2BG	6	26215159	26216692	-	1534	protein_coding	histone cluster 1 H2B family member g [Source:HGNC Symbol;Acc:HGNC:4746]	-	66	156	2.54259	5.12543
ENSG00000119139	1.10955	2.15778	0.0331458	0.654631	TJP2	9	69121264	69274615	+	15465	protein_coding	tight junction protein 2 [Source:HGNC Symbol;Acc:HGNC:11828]	-	61	33	0.233098	0.107546
ENSG00000273311	1.43857	2.71052	0.0331737	0.654631	DGCR11	22	19046162	19048375	-	2214	sense_intronic	DiGeorge syndrome critical region gene 11 [Source:HGNC Symbol;Acc:HGNC:17226]	-	28	12	0.747376	0.273171
ENSG00000231686	1.43857	2.71052	0.0331737	0.654631	Z97180.1	X	146619597	146620584	-	988	processed_pseudogene	novel pseudogene	-	28	12	1.67479	0.612147
ENSG00000239445	1.70656	3.26382	0.0333763	0.654631	ST3GAL6-AS1	3	98714330	98732651	-	843	antisense	ST3GAL6 antisense RNA 1 [Source:HGNC Symbol;Acc:HGNC:40828]	-	17	6	1.19174	0.35872
ENSG00000249700	-1.49872	2.82591	0.0335331	0.654631	SRD5A3-AS1	4	55363971	55395847	-	5148	processed_transcript	SRD5A3 antisense RNA 1 [Source:HGNC Symbol;Acc:HGNC:44138]	-	9	30	0.103315	0.293707
ENSG00000225339	1.10576	2.15212	0.0336418	0.654631	AL354740.1	6	34248568	34286768	+	8287	processed_transcript	novel transcript, antisense to C6orf1	-	59	32	0.420739	0.194619
ENSG00000275734	-1.56729	2.96347	0.0338323	0.654631	AC010538.1	16	89671568	89685304	+	3077	sense_overlapping	novel transcript, sense overlapping CDK10	-	8	28	0.153646	0.45863
ENSG00000205702	-1.56729	2.96347	0.0338323	0.654631	CYP2D7	22	42140203	42144577	-	2260	polymorphic_pseudogene	cytochrome P450 family 2 subfamily D member 7 (gene/pseudogene) [Source:HGNC Symbol;Acc:HGNC:2624]	-	8	28	0.20919	0.624426
ENSG00000280106	-1.82039	3.53176	0.0339102	0.654631	AC008555.8	19	34949038	34951205	-	2168	TEC	TEC	-	5	21	0.136292	0.488193
ENSG00000285571	-1.82039	3.53176	0.0339102	0.654631	AL513548.4	6	26677003	26683211	+	1114	lincRNA	novel transcript	-	5	21	0.265243	0.950092
ENSG00000233901	1.64815	3.1343	0.0339102	0.654631	LINC01503	9	129332300	129359538	+	1594	lincRNA	long intergenic non-protein coding RNA 1503 [Source:HGNC Symbol;Acc:HGNC:51184]	-	19	7	0.704407	0.22133
ENSG00000200913	-1.82039	3.53176	0.0339102	0.654631	SNORD46	1	44776490	44776593	+	104	snoRNA	small nucleolar RNA, C/D box 46 [Source:HGNC Symbol;Acc:HGNC:10186]	-	5	21	2.84116	10.1769
ENSG00000257185	-1.82039	3.53176	0.0339102	0.654631	LINC02293	14	26809417	26836458	+	853	lincRNA	long intergenic non-protein coding RNA 2293 [Source:HGNC Symbol;Acc:HGNC:53209]	-	5	21	0.346401	1.2408
ENSG00000162639	-1.65063	3.1397	0.0340354	0.654631	HENMT1	1	108648290	108661526	-	2426	protein_coding	HEN methyltransferase 1 [Source:HGNC Symbol;Acc:HGNC:26400]	-	7	26	0.170516	0.54015
ENSG00000243554	-1.65063	3.1397	0.0340354	0.654631	AC004967.1	7	97969005	97972254	-	447	transcribed_unprocessed_pseudogene	CCZ1 homolog, vacuolar protein trafficking and biogenesis associated (CCZ1) pseudogene	-	7	26	0.925442	2.93155
ENSG00000245148	1.50196	2.83228	0.0340354	0.654631	ARAP1-AS2	11	72700474	72705607	+	1824	antisense	ARAP1 antisense RNA 2 [Source:HGNC Symbol;Acc:HGNC:39994]	-	22	9	0.712782	0.248685
ENSG00000168679	-1.75427	3.37356	0.0340884	0.654631	SLC16A4	1	110362848	110391082	-	3167	protein_coding	solute carrier family 16 member 4 [Source:HGNC Symbol;Acc:HGNC:10925]	-	6	24	0.11196	0.38194
ENSG00000267288	-1.75427	3.37356	0.0340884	0.654631	AC138150.2	17	45168800	45171584	-	2381	antisense	uncharacterized LOC105371795 [Source:NCBI gene;Acc:105371795]	-	6	24	0.148919	0.508023
ENSG00000241280	-1.05588	2.07898	0.034151	0.654631	AC106712.1	3	101960358	101997926	+	2157	lincRNA	novel transcript	-	39	95	1.0685	2.21975
ENSG00000155307	-1.27074	2.41285	0.0342372	0.654631	SAMSN1	21	14485228	14658821	-	5185	protein_coding	SAM domain, SH3 domain and nuclear localization signals 1 [Source:HGNC Symbol;Acc:HGNC:10528]	-	18	51	0.205155	0.495739
ENSG00000232653	-1.12033	2.17396	0.0347397	0.654631	GOLGA8N	15	32593456	32607310	+	7602	protein_coding	golgin A8 family member N [Source:HGNC Symbol;Acc:HGNC:44405]	-	31	79	0.240986	0.523758
ENSG00000111913	3.06457	8.36621	0.0348666	0.654631	RIPOR2	6	24804281	25042170	-	9536	protein_coding	RHO family interacting cell polarization regulator 2 [Source:HGNC Symbol;Acc:HGNC:13872]	-	8	1	0.0495772	0.00528525
ENSG00000056558	-2.95756	7.76808	0.0348666	0.654631	TRAF1	9	120902393	120929173	-	6449	protein_coding	TNF receptor associated factor 1 [Source:HGNC Symbol;Acc:HGNC:12031]	-	1	10	0.0091636	0.0781518
ENSG00000243056	-2.95756	7.76808	0.0348666	0.654631	EIF4EBP3	5	140547666	140549578	+	691	protein_coding	eukaryotic translation initiation factor 4E binding protein 3 [Source:HGNC Symbol;Acc:HGNC:3290]	-	1	10	0.0855225	0.729379
ENSG00000114248	-2.95756	7.76808	0.0348666	0.654631	LRRC31	3	169839179	169869930	-	3113	protein_coding	leucine rich repeat containing 31 [Source:HGNC Symbol;Acc:HGNC:26261]	-	1	10	0.0189836	0.161902
ENSG00000260750	3.06457	8.36621	0.0348666	0.654631	AC092720.1	16	87492555	87515635	+	1356	lincRNA	uncharacterized LOC101928737 [Source:NCBI gene;Acc:101928737]	-	8	1	0.348649	0.0371682
ENSG00000170231	-2.95756	7.76808	0.0348666	0.654631	FABP6	5	160187367	160238735	+	1164	protein_coding	fatty acid binding protein 6 [Source:HGNC Symbol;Acc:HGNC:3561]	-	1	10	0.0507698	0.432991
ENSG00000243926	3.06457	8.36621	0.0348666	0.654631	TIPARP-AS1	3	156671862	156674378	-	1254	bidirectional_promoter_lncRNA	TIPARP antisense RNA 1 [Source:HGNC Symbol;Acc:HGNC:41028]	-	8	1	0.377008	0.0401915
ENSG00000230177	-2.95756	7.76808	0.0348666	0.654631	AL080317.1	6	111277932	111278742	+	557	antisense	novel transcript	-	1	10	0.106097	0.904849
ENSG00000122735	-2.95756	7.76808	0.0348666	0.654631	DNAI1	9	34457414	34520989	+	3615	protein_coding	dynein axonemal intermediate chain 1 [Source:HGNC Symbol;Acc:HGNC:2954]	-	1	10	0.0163475	0.139419
ENSG00000263968	-2.95756	7.76808	0.0348666	0.654631	RN7SL381P	16	85659378	85659675	+	298	misc_RNA	RNA, 7SL, cytoplasmic 381, pseudogene [Source:HGNC Symbol;Acc:HGNC:46397]	-	1	10	0.198309	1.69128
ENSG00000182459	-2.95756	7.76808	0.0348666	0.654631	TEX19	17	82359247	82363776	+	1936	protein_coding	testis expressed 19 [Source:HGNC Symbol;Acc:HGNC:33802]	-	1	10	0.0305248	0.260331
ENSG00000234478	-2.95756	7.76808	0.0348666	0.654631	ACBD3-AS1	1	226148003	226155071	+	535	antisense	ACBD3 antisense RNA 1 [Source:HGNC Symbol;Acc:HGNC:40701]	-	1	10	0.11046	0.942058
ENSG00000226747	3.06457	8.36621	0.0348666	0.654631	AC007966.1	2	185719874	185740479	-	1472	antisense	uncharacterized LOC101927196 [Source:NCBI gene;Acc:101927196]	-	8	1	0.321174	0.0342392
ENSG00000182870	3.06457	8.36621	0.0348666	0.654631	GALNT9	12	132196372	132329349	-	6969	protein_coding	polypeptide N-acetylgalactosaminyltransferase 9 [Source:HGNC Symbol;Acc:HGNC:4131]	-	8	1	0.0678388	0.00723204
ENSG00000230666	-2.95756	7.76808	0.0348666	0.654631	CEACAM22P	19	44537058	44620821	-	3170	transcribed_unprocessed_pseudogene	carcinoembryonic antigen related cell adhesion molecule 22, pseudogene [Source:HGNC Symbol;Acc:HGNC:38029]	-	1	10	0.0186423	0.158991
ENSG00000213512	3.06457	8.36621	0.0348666	0.654631	GBP7	1	89131751	89176040	-	2454	protein_coding	guanylate binding protein 7 [Source:HGNC Symbol;Acc:HGNC:29606]	-	8	1	0.192652	0.0205379
ENSG00000258646	-2.95756	7.76808	0.0348666	0.654631	AL049780.1	14	75004719	75008481	-	489	antisense	novel transcript, antisense to EIF2B2	-	1	10	0.120851	1.03068
ENSG00000248693	-2.95756	7.76808	0.0348666	0.654631	LINC02100	5	18704433	18746173	-	238	lincRNA	long intergenic non-protein coding RNA 2100 [Source:HGNC Symbol;Acc:HGNC:52955]	-	1	10	0.248303	2.11765
ENSG00000278374	-2.95756	7.76808	0.0348666	0.654631	RF00015	8	123454981	123455107	-	127	snRNA		-	1	10	0.465323	3.96851
ENSG00000137975	3.06457	8.36621	0.0348666	0.654631	CLCA2	1	86424086	86456558	+	4496	protein_coding	chloride channel accessory 2 [Source:HGNC Symbol;Acc:HGNC:2016]	-	8	1	0.105153	0.01121
ENSG00000146453	-2.95756	7.76808	0.0348666	0.654631	PNLDC1	6	159800249	159820704	+	2206	protein_coding	PARN like, ribonuclease domain containing 1 [Source:HGNC Symbol;Acc:HGNC:21185]	-	1	10	0.0267888	0.228468
ENSG00000261019	-2.95756	7.76808	0.0348666	0.654631	AC010132.4	7	42901272	42902639	-	1368	lincRNA	novel transcript	-	1	10	0.0431989	0.368422
ENSG00000145757	3.06457	8.36621	0.0348666	0.654631	SPATA9	5	95652181	95698711	-	2811	protein_coding	spermatogenesis associated 9 [Source:HGNC Symbol;Acc:HGNC:22988]	-	8	1	0.168185	0.0179296
ENSG00000244607	-2.95756	7.76808	0.0348666	0.654631	CCDC13	3	42708269	42773253	-	4558	protein_coding	coiled-coil domain containing 13 [Source:HGNC Symbol;Acc:HGNC:26358]	-	1	10	0.0129654	0.110575
ENSG00000185056	-2.95756	7.76808	0.0348666	0.654631	C5orf47	5	173973779	174006140	+	2758	protein_coding	chromosome 5 open reading frame 47 [Source:HGNC Symbol;Acc:HGNC:27026]	-	1	10	0.0214271	0.182742
ENSG00000227295	-2.95756	7.76808	0.0348666	0.654631	ELL2P1	1	158175850	158177755	-	1906	processed_pseudogene	elongation factor for RNA polymerase II 2 pseudogene 1 [Source:HGNC Symbol;Acc:HGNC:39343]	-	1	10	0.0310053	0.264429
ENSG00000267092	-2.95756	7.76808	0.0348666	0.654631	AC027307.1	19	1508375	1508963	+	457	antisense	novel transcript, antisense to ADAMTSL5	-	1	10	0.129313	1.10285
ENSG00000272209	3.06457	8.36621	0.0348666	0.654631	AL023583.1	6	13825432	13826574	+	1143	lincRNA	novel transcript	-	8	1	0.413621	0.0440946
ENSG00000235908	3.06457	8.36621	0.0348666	0.654631	RHOA-IT1	3	49365145	49367006	-	517	sense_intronic	RHOA intronic transcript 1 [Source:HGNC Symbol;Acc:HGNC:41308]	-	8	1	0.914446	0.0974857
ENSG00000260253	3.06457	8.36621	0.0348666	0.654631	AC084262.1	8	29352420	29353170	-	751	sense_overlapping	novel transcript, overlapping to DUSP4	-	8	1	0.629519	0.0671107
ENSG00000223935	-2.95756	7.76808	0.0348666	0.654631	LGALSL-DT	2	64395220	64453897	-	895	bidirectional_promoter_lncRNA	LGALSL divergent transcript [Source:HGNC Symbol;Acc:HGNC:53951]	-	1	10	0.0660291	0.56313
ENSG00000232456	3.06457	8.36621	0.0348666	0.654631	AL355994.2	1	16035178	16040029	-	704	unprocessed_pseudogene	pseudogene similar to part of novel protein FLJ36766	-	8	1	0.671546	0.0715911
ENSG00000248138	-2.95756	7.76808	0.0348666	0.654631	AC097515.1	4	16400430	16512187	+	730	antisense	novel transcript	-	1	10	0.0809535	0.690412
ENSG00000278642	-2.95756	7.76808	0.0348666	0.654631	AC015813.4	17	57955965	57956143	+	179	lincRNA	novel transcript	-	1	10	0.330146	2.81565
ENSG00000253171	3.06457	8.36621	0.0348666	0.654631	AC037450.1	8	87974165	88019113	+	647	antisense	novel transcript	-	8	1	0.730709	0.0778982
ENSG00000279379	3.06457	8.36621	0.0348666	0.654631	AC024595.1	4	19257951	19258337	-	387	TEC	TEC	-	8	1	1.22162	0.130233
ENSG00000118804	1.17005	2.25019	0.0353038	0.654631	STBD1	4	76306026	76311599	+	3420	protein_coding	starch binding domain 1 [Source:HGNC Symbol;Acc:HGNC:24854]	-	54	28	0.933096	0.412632
ENSG00000183889	-1.16213	2.23787	0.0353038	0.654631	PKD1P1	16	16317444	16350590	+	7897	protein_coding	polycystin 1, transient receptor potential channel interacting pseudogene 1 [Source:NCBI gene;Acc:339044]	-	24	63	0.179601	0.402078
ENSG00000168282	1.00647	2.00899	0.0353634	0.654631	MGAT2	14	49620795	49623481	+	2687	protein_coding	mannosyl (alpha-1,6-)-glycoprotein beta-1,2-N-acetylglucosaminyltransferase [Source:HGNC Symbol;Acc:HGNC:7045]	-	98	57	2.15535	1.06915
ENSG00000265917	-1.29107	2.44709	0.035482	0.654631	MIR3685	12	95309923	95309984	+	62	miRNA	microRNA 3685 [Source:HGNC Symbol;Acc:HGNC:38886]	-	16	46	15.2506	37.3936
ENSG00000181085	-1.168	2.24699	0.0365821	0.654631	MAPK15	8	143716259	143722458	+	3056	protein_coding	mitogen-activated protein kinase 15 [Source:HGNC Symbol;Acc:HGNC:24667]	-	22	58	0.42543	0.956547
ENSG00000099866	-1.25264	2.38278	0.0368698	0.654631	MADCAM1	19	489176	505342	+	2651	protein_coding	mucosal vascular addressin cell adhesion molecule 1 [Source:HGNC Symbol;Acc:HGNC:6765]	-	15	42	0.33438	0.798493
ENSG00000095383	1.08575	2.12248	0.037032	0.654631	TBC1D2	9	98198999	98255721	-	3681	protein_coding	TBC1 domain family member 2 [Source:HGNC Symbol;Acc:HGNC:18026]	-	60	33	0.963261	0.451835
ENSG00000159588	-1.28124	2.43047	0.0376208	0.654631	CCDC17	1	45620044	45624057	-	3323	protein_coding	coiled-coil domain containing 17 [Source:HGNC Symbol;Acc:HGNC:26574]	-	14	40	0.248975	0.606682
ENSG00000149489	1.02773	2.03882	0.0376598	0.654631	ROM1	11	62611722	62615120	+	2495	protein_coding	retinal outer segment membrane protein 1 [Source:HGNC Symbol;Acc:HGNC:10254]	-	89	51	2.10804	1.03022
ENSG00000183929	1.16049	2.23534	0.0380252	0.654631	DUSP5P1	1	228650241	228651379	+	1139	processed_pseudogene	dual specificity phosphatase 5 pseudogene 1 [Source:HGNC Symbol;Acc:HGNC:32020]	-	46	24	2.38667	1.06199
ENSG00000171121	-1.03761	2.05283	0.0383335	0.654631	KCNMB3	3	179236691	179267002	-	8979	protein_coding	potassium calcium-activated channel subfamily M regulatory beta subunit 3 [Source:HGNC Symbol;Acc:HGNC:6287]	-	37	89	0.243519	0.499567
ENSG00000282988	-1.3135	2.48544	0.0384107	0.654631	AL031777.3	6	26195595	26199293	-	2110	protein_coding	novel protein	-	13	38	0.364099	0.90768
ENSG00000279452	-1.3135	2.48544	0.0384107	0.654631	AC006277.1	19	2949035	2950644	+	1610	TEC	TEC	-	13	38	0.477173	1.18957
ENSG00000144230	-1.3135	2.48544	0.0384107	0.654631	GPR17	2	127645864	127652639	+	2671	protein_coding	G protein-coupled receptor 17 [Source:HGNC Symbol;Acc:HGNC:4471]	-	13	38	0.287626	0.717036
ENSG00000241241	-1.3135	2.48544	0.0384107	0.654631	KRTAP4-16	17	41101502	41102209	-	708	protein_coding	keratin associated protein 4-16 [Source:HGNC Symbol;Acc:HGNC:18921]	-	13	38	1.0851	2.70509
ENSG00000223797	-1.01168	2.01626	0.0385078	0.654631	ENTPD3-AS1	3	40313802	40453329	-	2961	antisense	ENTPD3 antisense RNA 1 [Source:HGNC Symbol;Acc:HGNC:26710]	-	47	111	0.938033	1.88937
ENSG00000130208	-1.30971	2.47892	0.0392385	0.654631	APOC1	19	44914247	44919349	+	1231	protein_coding	apolipoprotein C1 [Source:HGNC Symbol;Acc:HGNC:607]	-	12	35	0.576079	1.43298
ENSG00000044524	-1.3502	2.54948	0.0392385	0.654631	EPHA3	3	89107524	89482134	+	6674	protein_coding	EPH receptor A3 [Source:HGNC Symbol;Acc:HGNC:3387]	-	12	36	0.106256	0.271862
ENSG00000272872	-1.30971	2.47892	0.0392385	0.654631	AP000525.1	22	15823197	15823890	+	694	sense_intronic	novel transcript, sense intronic to novel transcript	-	12	35	1.02183	2.54179
ENSG00000122477	-1.3502	2.54948	0.0392385	0.654631	LRRC39	1	100148449	100178273	-	1991	protein_coding	leucine rich repeat containing 39 [Source:HGNC Symbol;Acc:HGNC:28228]	-	12	36	0.356179	0.911303
ENSG00000130377	-1.3502	2.54948	0.0392385	0.654631	ACSBG2	19	6135247	6193094	+	3447	protein_coding	acyl-CoA synthetase bubblegum family member 2 [Source:HGNC Symbol;Acc:HGNC:24174]	-	12	36	0.20573	0.526372
ENSG00000260604	-1.3502	2.54948	0.0392385	0.654631	AL590004.3	6	3904920	3911979	-	7060	lincRNA	novel transcript	-	12	36	0.100447	0.256998
ENSG00000233836	-1.02137	2.02985	0.0395674	0.654631	AC139769.1	19	23762944	23833314	+	3242	transcribed_unprocessed_pseudogene	zinc finger protein pseudogene	-	45	107	0.820272	1.66342
ENSG00000259429	-1.11568	2.16698	0.0399163	0.654631	UBE2Q2P2	15	82355142	82420075	+	1855	transcribed_unprocessed_pseudogene	ubiquitin conjugating enzyme E2 Q2 pseudogene 2 [Source:HGNC Symbol;Acc:HGNC:37440]	-	24	61	0.764585	1.65736
ENSG00000103599	-1.11568	2.16698	0.0399163	0.654631	IQCH	15	67254800	67502260	+	7108	protein_coding	IQ motif containing H [Source:HGNC Symbol;Acc:HGNC:25721]	-	24	61	0.199537	0.432528
ENSG00000179583	-1.34944	2.54814	0.0401014	0.654631	CIITA	16	10866222	10943021	+	20757	protein_coding	class II major histocompatibility complex transactivator [Source:HGNC Symbol;Acc:HGNC:7067]	-	11	33	0.0313175	0.0801274
ENSG00000102934	-1.02653	2.03711	0.0401334	0.654631	PLLP	16	57248547	57284687	-	8720	protein_coding	plasmolipin [Source:HGNC Symbol;Acc:HGNC:18553]	-	44	105	0.298191	0.606882
ENSG00000129680	-1.05867	2.08301	0.0402485	0.654631	MAP7D3	X	136213220	136256482	-	7067	protein_coding	MAP7 domain containing 3 [Source:HGNC Symbol;Acc:HGNC:25742]	-	34	83	0.284317	0.591936
ENSG00000112559	1.18642	2.27587	0.0405677	0.654631	MDFI	6	41636882	41654246	+	2523	protein_coding	MyoD family inhibitor [Source:HGNC Symbol;Acc:HGNC:6967]	-	41	21	0.96034	0.419502
ENSG00000261663	-1.23515	2.35405	0.0405677	0.654631	AC009065.8	16	2240487	2241818	+	788	antisense	novel transcript, antisense to DCI	-	17	47	1.27492	3.0061
ENSG00000230565	-1.23515	2.35405	0.0405677	0.654631	ZNF32-AS2	10	43645942	43648019	+	905	antisense	ZNF32 antisense RNA 2 [Source:HGNC Symbol;Acc:HGNC:23593]	-	17	47	1.11009	2.61746
ENSG00000261167	-1.1288	2.18677	0.0407562	0.654631	AC107027.3	3	131455126	131458598	-	3473	sense_overlapping	novel transcript, overlapping to MRPL3	-	23	59	0.391365	0.856207
ENSG00000111052	5.73002	53.0772	0.0409646	0.654631	LIN7A	12	80792520	80937925	-	6795	protein_coding	lin-7 homolog A, crumbs cell polarity complex component [Source:HGNC Symbol;Acc:HGNC:17787]	-	6	0	0.052182	0
ENSG00000138823	5.73002	53.0772	0.0409646	0.654631	MTTP	4	99563761	99623999	+	5398	protein_coding	microsomal triglyceride transfer protein [Source:HGNC Symbol;Acc:HGNC:7467]	-	6	0	0.0656866	0
ENSG00000166482	5.73002	53.0772	0.0409646	0.654631	MFAP4	17	19383442	19387240	-	2152	protein_coding	microfibril associated protein 4 [Source:HGNC Symbol;Acc:HGNC:7035]	-	6	0	0.164766	0
ENSG00000168243	-5.50827	45.5148	0.0409646	0.654631	GNG4	1	235547687	235650754	-	5401	protein_coding	G protein subunit gamma 4 [Source:HGNC Symbol;Acc:HGNC:4407]	-	0	6	0	0.0559898
ENSG00000168348	5.73002	53.0772	0.0409646	0.654631	INSM2	14	35534042	35537054	+	3013	protein_coding	INSM transcriptional repressor 2 [Source:HGNC Symbol;Acc:HGNC:17539]	zf-C2H2	6	0	0.117682	0
ENSG00000234456	-5.50827	45.5148	0.0409646	0.654631	MAGI2-AS3	7	79452877	79471208	+	11625	processed_transcript	MAGI2 antisense RNA 3 [Source:HGNC Symbol;Acc:HGNC:40862]	-	0	6	0	0.026013
ENSG00000139209	5.73002	53.0772	0.0409646	0.654631	SLC38A4	12	46764761	46832408	-	4145	protein_coding	solute carrier family 38 member 4 [Source:HGNC Symbol;Acc:HGNC:14679]	-	6	0	0.0855432	0
ENSG00000160963	-5.50827	45.5148	0.0409646	0.654631	COL26A1	7	101362820	101559024	+	3156	protein_coding	collagen type XXVI alpha 1 chain [Source:HGNC Symbol;Acc:HGNC:18038]	-	0	6	0	0.0958177
ENSG00000176884	-5.50827	45.5148	0.0409646	0.654631	GRIN1	9	137138390	137168762	+	6729	protein_coding	glutamate ionotropic receptor NMDA type subunit 1 [Source:HGNC Symbol;Acc:HGNC:4584]	-	0	6	0	0.0449399
ENSG00000198732	-5.50827	45.5148	0.0409646	0.654631	SMOC1	14	69854131	70032366	+	4369	protein_coding	SPARC related modular calcium binding 1 [Source:HGNC Symbol;Acc:HGNC:20318]	-	0	6	0	0.0692151
ENSG00000127329	-5.50827	45.5148	0.0409646	0.654631	PTPRB	12	70515866	70637440	-	14542	protein_coding	protein tyrosine phosphatase, receptor type B [Source:HGNC Symbol;Acc:HGNC:9665]	-	0	6	0	0.020795
ENSG00000222014	-5.50827	45.5148	0.0409646	0.654631	RAB6C	2	129979664	129982738	+	3075	protein_coding	RAB6C, member RAS oncogene family [Source:HGNC Symbol;Acc:HGNC:16525]	-	0	6	0	0.0983417
ENSG00000170044	-5.50827	45.5148	0.0409646	0.654631	ZPLD1	3	102099244	102479841	+	5130	protein_coding	zona pellucida like domain containing 1 [Source:HGNC Symbol;Acc:HGNC:27022]	-	0	6	0	0.0589475
ENSG00000066032	-5.50827	45.5148	0.0409646	0.654631	CTNNA2	2	79185231	80648861	+	7535	protein_coding	catenin alpha 2 [Source:HGNC Symbol;Acc:HGNC:2510]	-	0	6	0	0.0401328
ENSG00000109705	5.73002	53.0772	0.0409646	0.654631	NKX3-2	4	13540830	13545050	-	2801	protein_coding	NK3 homeobox 2 [Source:HGNC Symbol;Acc:HGNC:951]	Homeobox	6	0	0.126589	0
ENSG00000056291	-5.50827	45.5148	0.0409646	0.654631	NPFFR2	4	72031804	72148067	+	2359	protein_coding	neuropeptide FF receptor 2 [Source:HGNC Symbol;Acc:HGNC:4525]	-	0	6	0	0.12819
ENSG00000104044	-5.50827	45.5148	0.0409646	0.654631	OCA2	15	27754875	28099358	-	3299	protein_coding	OCA2 melanosomal transmembrane protein [Source:HGNC Symbol;Acc:HGNC:8101]	-	0	6	0	0.0916643
ENSG00000186517	5.73002	53.0772	0.0409646	0.654631	ARHGAP30	1	161046946	161069970	-	5064	protein_coding	Rho GTPase activating protein 30 [Source:HGNC Symbol;Acc:HGNC:27414]	-	6	0	0.070019	0
ENSG00000144406	-5.50827	45.5148	0.0409646	0.654631	UNC80	2	209771993	209999300	+	19258	protein_coding	unc-80 homolog, NALCN channel complex subunit [Source:HGNC Symbol;Acc:HGNC:26582]	-	0	6	0	0.0157026
ENSG00000018280	5.73002	53.0772	0.0409646	0.654631	SLC11A1	2	218382029	218396894	+	8676	protein_coding	solute carrier family 11 member 1 [Source:HGNC Symbol;Acc:HGNC:10907]	-	6	0	0.0408687	0
ENSG00000095370	5.73002	53.0772	0.0409646	0.654631	SH2D3C	9	127738317	127778741	-	4659	protein_coding	SH2 domain containing 3C [Source:HGNC Symbol;Acc:HGNC:16884]	-	6	0	0.0761057	0
ENSG00000228146	5.73002	53.0772	0.0409646	0.654631	CASP16P	16	3144015	3149963	+	3538	transcribed_unitary_pseudogene	caspase 16, pseudogene [Source:HGNC Symbol;Acc:HGNC:27290]	-	6	0	0.100219	0
ENSG00000180066	-5.50827	45.5148	0.0409646	0.654631	C10orf91	10	132444327	132449408	+	2040	lincRNA	chromosome 10 open reading frame 91 (putative) [Source:HGNC Symbol;Acc:HGNC:27275]	-	0	6	0	0.148236
ENSG00000267909	5.73002	53.0772	0.0409646	0.654631	CCDC177	14	69569816	69574837	-	4131	protein_coding	coiled-coil domain containing 177 [Source:HGNC Symbol;Acc:HGNC:23243]	-	6	0	0.0858331	0
ENSG00000131831	5.73002	53.0772	0.0409646	0.654631	RAI2	X	17800049	17861337	-	2622	protein_coding	retinoic acid induced 2 [Source:HGNC Symbol;Acc:HGNC:9835]	-	6	0	0.135231	0
ENSG00000226853	-5.50827	45.5148	0.0409646	0.654631	AC010894.2	2	174487389	174488386	+	791	lincRNA	novel transcript	-	0	6	0	0.382302
ENSG00000182389	-5.50827	45.5148	0.0409646	0.654631	CACNB4	2	151832768	152099475	-	36268	protein_coding	calcium voltage-gated channel auxiliary subunit beta 4 [Source:HGNC Symbol;Acc:HGNC:1404]	-	0	6	0	0.00833795
ENSG00000231245	5.73002	53.0772	0.0409646	0.654631	C1DP1	10	32511336	32511737	-	402	processed_pseudogene	C1D nuclear receptor corepressor pseudogene 1 [Source:HGNC Symbol;Acc:HGNC:31465]	-	6	0	0.882031	0
ENSG00000224057	-5.50827	45.5148	0.0409646	0.654631	EGFR-AS1	7	55179750	55188934	-	2806	antisense	EGFR antisense RNA 1 [Source:HGNC Symbol;Acc:HGNC:40207]	-	0	6	0	0.107769
ENSG00000251141	5.73002	53.0772	0.0409646	0.654631	MRPS30-DT	5	44744900	44808777	-	2211	antisense	MRPS30 divergent transcript [Source:HGNC Symbol;Acc:HGNC:53420]	-	6	0	0.160369	0
ENSG00000251169	-5.50827	45.5148	0.0409646	0.654631	LINC01843	5	134506552	134509229	+	1107	lincRNA	long intergenic non-protein coding RNA 1843 [Source:HGNC Symbol;Acc:HGNC:52659]	-	0	6	0	0.273171
ENSG00000138316	5.73002	53.0772	0.0409646	0.654631	ADAMTS14	10	70672803	70762441	+	5269	protein_coding	ADAM metallopeptidase with thrombospondin type 1 motif 14 [Source:HGNC Symbol;Acc:HGNC:14899]	-	6	0	0.0672948	0
ENSG00000151062	5.73002	53.0772	0.0409646	0.654631	CACNA2D4	12	1791957	1918836	-	7639	protein_coding	calcium voltage-gated channel auxiliary subunit alpha2delta 4 [Source:HGNC Symbol;Acc:HGNC:20202]	-	6	0	0.0464166	0
ENSG00000245685	-5.50827	45.5148	0.0409646	0.654631	FRG1-DT	4	189780336	189940271	-	2304	lincRNA	FRG1 divergent transcript [Source:HGNC Symbol;Acc:HGNC:51590]	-	0	6	0	0.13125
ENSG00000091128	-5.50827	45.5148	0.0409646	0.654631	LAMB4	7	108023548	108130356	-	7016	protein_coding	laminin subunit beta 4 [Source:HGNC Symbol;Acc:HGNC:6491]	-	0	6	0	0.0431016
ENSG00000007171	5.73002	53.0772	0.0409646	0.654631	NOS2	17	27756766	27800499	-	4369	protein_coding	nitric oxide synthase 2 [Source:HGNC Symbol;Acc:HGNC:7873]	-	6	0	0.0811573	0
ENSG00000128218	5.73002	53.0772	0.0409646	0.654631	VPREB3	22	23752743	23754468	-	610	protein_coding	V-set pre-B cell surrogate light chain 3 [Source:HGNC Symbol;Acc:HGNC:12710]	-	6	0	0.581273	0
ENSG00000173253	5.73002	53.0772	0.0409646	0.654631	DMRT2	9	1049858	1057552	+	3560	protein_coding	doublesex and mab-3 related transcription factor 2 [Source:HGNC Symbol;Acc:HGNC:2935]	DM	6	0	0.0996001	0
ENSG00000156886	-5.50827	45.5148	0.0409646	0.654631	ITGAD	16	31393312	31426505	+	4411	protein_coding	integrin subunit alpha D [Source:HGNC Symbol;Acc:HGNC:6146]	-	0	6	0	0.068556
ENSG00000273706	5.73002	53.0772	0.0409646	0.654631	LHX1	17	36936785	36944612	+	4882	protein_coding	LIM homeobox 1 [Source:HGNC Symbol;Acc:HGNC:6593]	-	6	0	0.0726293	0
ENSG00000230524	-5.50827	45.5148	0.0409646	0.654631	COL6A4P1	3	15151833	15205959	-	4566	transcribed_unprocessed_pseudogene	collagen type VI alpha 4 pseudogene 1 [Source:HGNC Symbol;Acc:HGNC:33484]	-	0	6	0	0.0662288
ENSG00000258949	5.73002	53.0772	0.0409646	0.654631	AL049870.3	14	44898908	44911863	-	360	antisense	uncharacterized LOC101927418 [Source:NCBI gene;Acc:101927418]	-	6	0	0.984935	0
ENSG00000004776	-5.50827	45.5148	0.0409646	0.654631	HSPB6	19	35754569	35758079	-	1721	protein_coding	heat shock protein family B (small) member 6 [Source:HGNC Symbol;Acc:HGNC:26511]	-	0	6	0	0.175712
ENSG00000270265	5.73002	53.0772	0.0409646	0.654631	AC104819.3	4	151333775	151353224	-	540	lincRNA	novel transcript	-	6	0	0.656623	0
ENSG00000226359	5.73002	53.0772	0.0409646	0.654631	ACTG1P24	17	17242010	17242886	+	877	processed_pseudogene	actin gamma 1 pseudogene 24 [Source:HGNC Symbol;Acc:HGNC:49661]	-	6	0	0.404306	0
ENSG00000268756	5.73002	53.0772	0.0409646	0.654631	AC104534.1	19	38820166	38823223	+	566	antisense	novel transcript, antisense to ECH1	-	6	0	0.62646	0
ENSG00000230667	5.73002	53.0772	0.0409646	0.654631	SETSIP	1	92074533	92075441	-	909	protein_coding	SET-like protein [Source:HGNC Symbol;Acc:HGNC:42937]	-	6	0	0.390073	0
ENSG00000252498	-5.50827	45.5148	0.0409646	0.654631	RNU6-1016P	6	75644084	75644177	+	94	snRNA	RNA, U6 small nuclear 1016, pseudogene [Source:HGNC Symbol;Acc:HGNC:47979]	-	0	6	0	3.21703
ENSG00000266456	-5.50827	45.5148	0.0409646	0.654631	AP001178.3	18	650229	652843	+	2106	antisense	novel transcript, antisense to C18orf56	-	0	6	0	0.14359
ENSG00000178342	5.73002	53.0772	0.0409646	0.654631	KCNG2	18	79863668	79900184	+	2162	protein_coding	potassium voltage-gated channel modifier subfamily G member 2 [Source:HGNC Symbol;Acc:HGNC:6249]	-	6	0	0.164004	0
ENSG00000223791	5.73002	53.0772	0.0409646	0.654631	UBE2E1-AS1	3	23804024	23806905	-	778	antisense	UBE2E1 antisense RNA 1 [Source:HGNC Symbol;Acc:HGNC:40598]	-	6	0	0.455754	0
ENSG00000236569	-5.50827	45.5148	0.0409646	0.654631	HNRNPA1P73	7	27328607	27329534	-	928	processed_pseudogene	heterogeneous nuclear ribonucleoprotein A1 pseudogene 73 [Source:HGNC Symbol;Acc:HGNC:48803]	-	0	6	0	0.325863
ENSG00000234230	5.73002	53.0772	0.0409646	0.654631	ZFX-AS1	X	24146225	24149654	-	417	antisense	ZFX antisense RNA 1 [Source:HGNC Symbol;Acc:HGNC:40617]	-	6	0	0.850303	0
ENSG00000254554	5.73002	53.0772	0.0409646	0.654631	AC080023.1	11	10302657	10303704	-	803	antisense	novel transcript	-	6	0	0.441565	0
ENSG00000277581	5.73002	53.0772	0.0409646	0.654631	AL023803.3	20	38962472	38962993	+	522	sense_intronic	novel transcript, sense intronic to DHX35	-	6	0	0.679265	0
ENSG00000103184	-5.50827	45.5148	0.0409646	0.654631	SEC14L5	16	4958317	5019158	+	6477	protein_coding	SEC14 like lipid binding 5 [Source:HGNC Symbol;Acc:HGNC:29032]	-	0	6	0	0.0466884
ENSG00000235044	5.73002	53.0772	0.0409646	0.654631	PPIAP3	20	37530039	37530543	+	505	processed_pseudogene	peptidylprolyl isomerase A pseudogene 3 [Source:HGNC Symbol;Acc:HGNC:16545]	-	6	0	0.702132	0
ENSG00000260500	5.73002	53.0772	0.0409646	0.654631	AC010336.2	19	7918652	7919157	-	506	antisense	novel transcript, antisense to CTD-3193O13.2	-	6	0	0.700744	0
ENSG00000233056	-5.50827	45.5148	0.0409646	0.654631	ERVH48-1	21	42916803	42925646	-	2842	lincRNA	endogenous retrovirus group 48 member 1 [Source:HGNC Symbol;Acc:HGNC:17216]	-	0	6	0	0.106404
ENSG00000246130	-5.50827	45.5148	0.0409646	0.654631	AC107959.2	8	23068229	23083619	+	2636	antisense	TNF receptor superfamily member 10d pseudogene [Source:NCBI gene;Acc:286059]	-	0	6	0	0.11472
ENSG00000153789	-5.50827	45.5148	0.0409646	0.654631	FAM92B	16	85098358	85112508	-	1904	protein_coding	family with sequence similarity 92 member B [Source:HGNC Symbol;Acc:HGNC:24781]	-	0	6	0	0.158824
ENSG00000285672	5.73002	53.0772	0.0409646	0.654631	AL160396.2	13	114275326	114277323	-	1202	lincRNA	novel transcript	-	6	0	0.294989	0
ENSG00000183785	5.73002	53.0772	0.0409646	0.654631	TUBA8	22	18110331	18146554	+	3641	protein_coding	tubulin alpha 8 [Source:HGNC Symbol;Acc:HGNC:12410]	-	6	0	0.0973844	0
ENSG00000226009	5.73002	53.0772	0.0409646	0.654631	KCNIP2-AS1	10	101819078	101828779	+	850	antisense	KCNIP2 antisense RNA 1 [Source:HGNC Symbol;Acc:HGNC:48680]	-	6	0	0.417149	0
ENSG00000254539	-5.50827	45.5148	0.0409646	0.654631	AC239804.1	1	149048576	149051273	+	869	lincRNA	novel transcript	-	0	6	0	0.347987
ENSG00000270876	-5.50827	45.5148	0.0409646	0.654631	ZNF30-AS1	19	34923299	34926812	-	625	lincRNA	ZNF30 antisense RNA 1 [Source:HGNC Symbol;Acc:HGNC:51179]	-	0	6	0	0.483841
ENSG00000257896	5.73002	53.0772	0.0409646	0.654631	AC093012.1	12	43736628	43741067	+	1170	transcribed_unprocessed_pseudogene	La ribonucleoprotein domain family, member 7 (LARP7)	-	6	0	0.303057	0
ENSG00000241057	5.73002	53.0772	0.0409646	0.654631	AC004951.3	7	43961590	43973323	-	1148	transcribed_unprocessed_pseudogene	RAS p21 protein activator 4 (RASA4) pseudogene	-	6	0	0.308864	0
ENSG00000074706	-5.50827	45.5148	0.0409646	0.654631	IPCEF1	6	154154496	154356792	-	8474	protein_coding	interaction protein for cytohesin exchange factors 1 [Source:HGNC Symbol;Acc:HGNC:21204]	-	0	6	0	0.0356857
ENSG00000203952	-5.50827	45.5148	0.0409646	0.654631	CCDC160	X	134237047	134246207	+	1790	protein_coding	coiled-coil domain containing 160 [Source:HGNC Symbol;Acc:HGNC:37286]	-	0	6	0	0.168939
ENSG00000269899	-5.50827	45.5148	0.0409646	0.654631	AC025857.2	8	11846154	11846391	-	238	sense_intronic	novel transcript, sense intronic to CTSB	-	0	6	0	1.27059
ENSG00000255176	-5.50827	45.5148	0.0409646	0.654631	AP000941.1	11	118636620	118638097	+	1388	antisense	novel transcript	-	0	6	0	0.217868
ENSG00000207864	5.73002	53.0772	0.0409646	0.654631	MIR27B	9	95085445	95085541	+	97	miRNA	microRNA 27b [Source:HGNC Symbol;Acc:HGNC:31614]	-	6	0	3.65543	0
ENSG00000236723	5.73002	53.0772	0.0409646	0.654631	AL606760.2	1	53209783	53213775	-	1227	antisense	novel transcript, antisense to CPT2	-	6	0	0.288978	0
ENSG00000271978	-5.50827	45.5148	0.0409646	0.654631	AL359643.2	6	5031756	5054423	-	3273	lincRNA	novel transcript	-	0	6	0	0.0923925
ENSG00000133246	-5.50827	45.5148	0.0409646	0.654631	PRAM1	19	8490056	8503112	-	3763	protein_coding	PML-RARA regulated adaptor molecule 1 [Source:HGNC Symbol;Acc:HGNC:30091]	-	0	6	0	0.0803616
ENSG00000105122	5.73002	53.0772	0.0409646	0.654631	RASAL3	19	15451624	15464571	-	4681	protein_coding	RAS protein activator like 3 [Source:HGNC Symbol;Acc:HGNC:26129]	-	6	0	0.075748	0
ENSG00000235121	-5.50827	45.5148	0.0409646	0.654631	AL645504.1	1	201723294	201737506	-	1809	antisense	novel transcript	-	0	6	0	0.167165
ENSG00000283635	5.73002	53.0772	0.0409646	0.654631	AC012485.3	2	238289127	238300185	+	2424	antisense	novel transcript, antisense to PER2	-	6	0	0.146277	0
ENSG00000111215	-5.50827	45.5148	0.0409646	0.654631	PRR4	12	10845849	10849475	-	1310	protein_coding	proline rich 4 [Source:HGNC Symbol;Acc:HGNC:18020]	-	0	6	0	0.23084
ENSG00000231636	-5.50827	45.5148	0.0409646	0.654631	AGBL5-AS1	2	27049683	27050264	-	407	antisense	AGBL5 antisense RNA 1 [Source:HGNC Symbol;Acc:HGNC:41133]	-	0	6	0	0.742999
ENSG00000239486	5.73002	53.0772	0.0409646	0.654631	AC091390.3	7	102380465	102382737	-	338	unprocessed_pseudogene	pseudogene similar to part of stromal antigen 3 STAG3	-	6	0	1.04904	0
ENSG00000261204	-5.50827	45.5148	0.0409646	0.654631	AC004449.1	19	637105	637537	-	433	lincRNA	novel transcript	-	0	6	0	0.698385
ENSG00000255933	-5.50827	45.5148	0.0409646	0.654631	AC117500.2	12	131756966	131758047	-	666	lincRNA	novel transcript	-	0	6	0	0.454055
ENSG00000233613	-5.50827	45.5148	0.0409646	0.654631	DCUN1D2-AS	13	113468901	113476135	+	373	antisense	DCUN1D2 antisense RNA [Source:HGNC Symbol;Acc:HGNC:39889]	-	0	6	0	0.810726
ENSG00000196337	-5.50827	45.5148	0.0409646	0.654631	CGB7	19	49054275	49058860	-	3386	protein_coding	chorionic gonadotropin subunit beta 7 [Source:HGNC Symbol;Acc:HGNC:16451]	-	0	6	0	0.0893091
ENSG00000262434	5.73002	53.0772	0.0409646	0.654631	AC087392.4	17	789744	790525	-	486	antisense	novel transcript, antisense to RNMTL1	-	6	0	0.729581	0
ENSG00000248968	-5.50827	45.5148	0.0409646	0.654631	AC012640.1	5	10248325	10249915	+	688	antisense	novel transcript	-	0	6	0	0.439536
ENSG00000257894	5.73002	53.0772	0.0409646	0.654631	AC027288.3	12	79341205	79503396	-	2253	lincRNA	novel transcript	-	6	0	0.15738	0
ENSG00000259414	5.73002	53.0772	0.0409646	0.654631	AC242376.1	15	23289303	23293667	-	726	unprocessed_pseudogene	hect domain and RLD 2 pseudogene 7	-	6	0	0.488397	0
ENSG00000166603	5.73002	53.0772	0.0409646	0.654631	MC4R	18	60371062	60372775	-	1714	protein_coding	melanocortin 4 receptor [Source:HGNC Symbol;Acc:HGNC:6932]	-	6	0	0.206871	0
ENSG00000198074	5.73002	53.0772	0.0409646	0.654631	AKR1B10	7	134527592	134541408	+	1744	protein_coding	aldo-keto reductase family 1 member B10 [Source:HGNC Symbol;Acc:HGNC:382]	-	6	0	0.203312	0
ENSG00000275769	5.73002	53.0772	0.0409646	0.654631	AC068792.1	12	31443792	31444208	-	417	sense_intronic	novel transcript, sense intronic to DENND5B	-	6	0	0.850303	0
ENSG00000257818	-5.50827	45.5148	0.0409646	0.654631	C1GALT1P1	12	69284397	69285485	+	1089	processed_pseudogene	core 1 synthase, glycoprotein-N-acetylgalactosamine 3-beta-galactosyltransferase 1 pseudogene 1 [Source:HGNC Symbol;Acc:HGNC:51614]	-	0	6	0	0.277687
ENSG00000267345	5.73002	53.0772	0.0409646	0.654631	AC010632.1	19	37075113	37078605	-	572	antisense	novel transcript, antisense to ZNF420	-	6	0	0.619889	0
ENSG00000223284	-5.50827	45.5148	0.0409646	0.654631	RNU6-195P	19	40708055	40708163	-	109	snRNA	RNA, U6 small nuclear 195, pseudogene [Source:HGNC Symbol;Acc:HGNC:47158]	-	0	6	0	2.77432
ENSG00000051180	5.73002	53.0772	0.0409646	0.654631	RAD51	15	40694774	40732339	+	3046	protein_coding	RAD51 recombinase [Source:HGNC Symbol;Acc:HGNC:9817]	-	6	0	0.116407	0
ENSG00000145721	-5.50827	45.5148	0.0409646	0.654631	LIX1	5	97091867	97142872	-	4115	protein_coding	limb and CNS expressed 1 [Source:HGNC Symbol;Acc:HGNC:18581]	-	0	6	0	0.0734874
ENSG00000267279	5.73002	53.0772	0.0409646	0.654631	AC090409.1	18	61585746	61606916	-	1199	lincRNA	novel transcript	-	6	0	0.295727	0
ENSG00000261135	-5.50827	45.5148	0.0409646	0.654631	AL137802.2	1	16514645	16515754	+	1110	lincRNA	novel transcript	-	0	6	0	0.272433
ENSG00000221055	5.73002	53.0772	0.0409646	0.654631	MIR1302-3	2	113582959	113583096	-	138	miRNA	microRNA 1302-3 [Source:HGNC Symbol;Acc:HGNC:35295]	-	6	0	2.56939	0
ENSG00000187492	-5.50827	45.5148	0.0409646	0.654631	CDHR4	3	49790732	49799835	-	3163	protein_coding	cadherin related family member 4 [Source:HGNC Symbol;Acc:HGNC:34527]	-	0	6	0	0.0956056
ENSG00000271858	-5.50827	45.5148	0.0409646	0.654631	CYB561D2	3	50365334	50368197	+	1202	antisense	cytochrome b561 family member D2 [Source:NCBI gene;Acc:11068]	-	0	6	0	0.251581
ENSG00000267927	-5.50827	45.5148	0.0409646	0.654631	AC010320.1	19	52171158	52177002	+	578	antisense	novel transcript, antisense to ZNF836	-	0	6	0	0.523185
ENSG00000188996	5.73002	53.0772	0.0409646	0.654631	HUS1B	6	655939	656963	-	1025	protein_coding	HUS1 checkpoint clamp component B [Source:HGNC Symbol;Acc:HGNC:16485]	-	6	0	0.345928	0
ENSG00000261519	-5.50827	45.5148	0.0409646	0.654631	AC010542.4	16	66549280	66551189	+	1910	lincRNA	novel transcript	-	0	6	0	0.158325
ENSG00000267651	-5.50827	45.5148	0.0409646	0.654631	AC015961.1	18	37234119	37236242	-	2124	lincRNA	novel transcript	-	0	6	0	0.142373
ENSG00000263276	-5.50827	45.5148	0.0409646	0.654631	AC020978.7	16	68224713	68227734	+	3022	sense_overlapping	novel transcript	-	0	6	0	0.100066
ENSG00000280035	5.73002	53.0772	0.0409646	0.654631	AC011676.5	8	141224288	141226947	-	2660	TEC	TEC	-	6	0	0.133299	0
ENSG00000252361	-5.50827	45.5148	0.0409646	0.654631	RNU6-118P	11	62815966	62816067	-	102	snRNA	RNA, U6 small nuclear 118, pseudogene [Source:HGNC Symbol;Acc:HGNC:47081]	-	0	6	0	2.96471
ENSG00000135517	-5.50827	45.5148	0.0409646	0.654631	MIP	12	56449502	56469166	-	3547	protein_coding	major intrinsic protein of lens fiber [Source:HGNC Symbol;Acc:HGNC:7103]	-	0	6	0	0.0852553
ENSG00000183911	5.73002	53.0772	0.0409646	0.654631	RPL21P132	X	101339917	101340934	+	462	processed_pseudogene	ribosomal protein L21 pseudogene 132 [Source:HGNC Symbol;Acc:HGNC:35865]	-	6	0	0.767481	0
ENSG00000273327	-5.50827	45.5148	0.0409646	0.654631	OR6L2P	10	133430394	133431318	-	925	unprocessed_pseudogene	olfactory receptor family 6 subfamily L member 2 pseudogene [Source:HGNC Symbol;Acc:HGNC:15125]	-	0	6	0	0.32692
ENSG00000225680	-5.50827	45.5148	0.0409646	0.654631	AL163953.1	14	53599832	53614026	-	726	lincRNA	novel transcript	-	0	6	0	0.41653
ENSG00000272112	-5.50827	45.5148	0.0409646	0.654631	AC011374.2	5	151724831	151725356	-	526	lincRNA	novel transcript	-	0	6	0	0.574906
ENSG00000228021	-5.50827	45.5148	0.0409646	0.654631	AL158835.1	10	125683229	125709677	+	4558	processed_transcript	uncharacterized LOC283038 [Source:NCBI gene;Acc:283038]	-	0	6	0	0.066345
ENSG00000280248	-5.50827	45.5148	0.0409646	0.654631	AC124319.4	17	80339898	80342058	+	2161	TEC	TEC	-	0	6	0	0.139936
ENSG00000227947	-5.50827	45.5148	0.0409646	0.654631	LINC01738	1	47688463	47703383	+	815	lincRNA	long intergenic non-protein coding RNA 1738 [Source:HGNC Symbol;Acc:HGNC:52526]	-	0	6	0	0.371044
ENSG00000240497	5.73002	53.0772	0.0409646	0.654631	AC092919.1	3	171468084	171469633	+	229	lincRNA	novel transcript	-	6	0	1.54837	0
ENSG00000182722	-5.50827	45.5148	0.0409646	0.654631	SEPHS1P1	7	64852397	64853354	-	958	processed_pseudogene	selenophosphate synthetase 1 pseudogene 1 [Source:HGNC Symbol;Acc:HGNC:42161]	-	0	6	0	0.315658
ENSG00000261401	-5.50827	45.5148	0.0409646	0.654631	AC091304.3	15	28332237	28336609	+	716	unprocessed_pseudogene	hect domain and RLD 2 pseudogene 11 [Source:NCBI gene;Acc:100996738]	-	0	6	0	0.422347
ENSG00000215304	5.73002	53.0772	0.0409646	0.654631	AC135983.1	15	32398956	32435233	-	1097	processed_transcript	novel transcript	-	6	0	0.323224	0
ENSG00000259518	-5.50827	45.5148	0.0409646	0.654631	LINC01583	15	82088594	82097694	+	2568	lincRNA	long intergenic non-protein coding RNA 1583 [Source:HGNC Symbol;Acc:HGNC:51425]	-	0	6	0	0.117757
ENSG00000252835	-5.50827	45.5148	0.0409646	0.654631	SCARNA21	17	7906122	7906260	+	139	scaRNA	small Cajal body-specific RNA 21 [Source:HGNC Symbol;Acc:HGNC:32579]	-	0	6	0	2.17554
ENSG00000253736	5.73002	53.0772	0.0409646	0.654631	AC022217.3	5	172762980	172782334	+	837	antisense	novel transcript, antisense to DUSP1	-	6	0	0.423628	0
ENSG00000256234	5.73002	53.0772	0.0409646	0.654631	AC022509.2	12	26211164	26335856	-	699	antisense	novel transcript, antisense to SSPN and ITPR2	-	6	0	0.507262	0
ENSG00000258260	-5.50827	45.5148	0.0409646	0.654631	AC073896.5	12	56267793	56270104	-	542	antisense	novel transcript, antisense to COQ10A	-	0	6	0	0.557935
ENSG00000258599	-5.50827	45.5148	0.0409646	0.654631	AL355922.2	14	20983155	20985066	-	578	processed_pseudogene	coiled-coil domain containing 107 (CCDC107) pseudogene	-	0	6	0	0.523185
ENSG00000104879	-5.50827	45.5148	0.0409646	0.654631	CKM	19	45306414	45322977	-	1657	protein_coding	creatine kinase, M-type [Source:HGNC Symbol;Acc:HGNC:1994]	-	0	6	0	0.182499
ENSG00000232163	-5.50827	45.5148	0.0409646	0.654631	RPLP1P13	13	23373423	23374061	+	299	processed_pseudogene	ribosomal protein lateral stalk subunit P1 pseudogene 13 [Source:HGNC Symbol;Acc:HGNC:41973]	-	0	6	0	1.01137
ENSG00000175202	-5.50827	45.5148	0.0409646	0.654631	HIGD2B	15	72675782	72686149	-	1117	protein_coding	HIG1 hypoxia inducible domain family member 2B [Source:HGNC Symbol;Acc:HGNC:26984]	-	0	6	0	0.270726
ENSG00000200677	-5.50827	45.5148	0.0409646	0.654631	RF00093	15	90755243	90755312	-	70	snoRNA		-	0	6	0	4.32001
ENSG00000252494	-5.50827	45.5148	0.0409646	0.654631	RNU6-126P	11	78133420	78133522	-	103	snRNA	RNA, U6 small nuclear 126, pseudogene [Source:HGNC Symbol;Acc:HGNC:47089]	-	0	6	0	2.93593
ENSG00000257298	-5.50827	45.5148	0.0409646	0.654631	AC008147.2	12	50185580	50191363	-	4713	sense_intronic	novel transcript, sense intronic to LIMA1	-	0	6	0	0.0641631
ENSG00000266677	-5.50827	45.5148	0.0409646	0.654631	AC087164.1	17	18172625	18184753	-	2279	antisense	novel transcript	-	0	6	0	0.13269
ENSG00000233647	-5.50827	45.5148	0.0409646	0.654631	NENFP1	1	46665910	46666375	-	466	processed_pseudogene	neudesin neurotrophic factor pseudogene 1 [Source:HGNC Symbol;Acc:HGNC:50298]	-	0	6	0	0.648928
ENSG00000234043	-5.50827	45.5148	0.0409646	0.654631	NUDT9P1	10	91152605	91153349	-	745	processed_pseudogene	nudix hydrolase 9 pseudogene 1 [Source:HGNC Symbol;Acc:HGNC:28523]	-	0	6	0	0.405907
ENSG00000283765	-5.50827	45.5148	0.0409646	0.654631	AC131160.1	3	183815568	183884889	-	3058	protein_coding	novel protein	-	0	6	0	0.0988884
ENSG00000259397	-5.50827	45.5148	0.0409646	0.654631	AC021231.2	15	35092481	35093210	+	730	processed_pseudogene	U2 small nuclear RNA auxiliary factor 1 (U2AF1) pseudogene	-	0	6	0	0.414247
ENSG00000228779	-5.50827	45.5148	0.0409646	0.654631	Z69666.1	16	125737	127219	+	801	antisense	novel transcript	-	0	6	0	0.377529
ENSG00000213253	5.73002	53.0772	0.0409646	0.654631	RPL12P42	19	13157959	13158788	-	499	processed_pseudogene	ribosomal protein L12 pseudogene 42 [Source:HGNC Symbol;Acc:HGNC:36165]	-	6	0	0.710574	0
ENSG00000163825	-5.50827	45.5148	0.0409646	0.654631	RTP3	3	46497491	46500949	+	1321	protein_coding	receptor transporter protein 3 [Source:HGNC Symbol;Acc:HGNC:15572]	-	0	6	0	0.228918
ENSG00000238193	-5.50827	45.5148	0.0409646	0.654631	AC112656.1	X	5305714	5307128	-	1415	processed_pseudogene	hydroxyacyl-Coenzyme A dehydrogenase\/3-ketoacyl-Coenzyme A thiolase\/enoyl-Coenzyme A hydratase (trifunctional protein), beta subunit (HADHB)(HADH) pseudogene	-	0	6	0	0.213711
ENSG00000259162	-5.50827	45.5148	0.0409646	0.654631	AL355075.5	14	20437982	20441268	+	992	transcribed_unprocessed_pseudogene	solute carrier family 12 (sodium/chloride transporters), member 3 (SLC12A3) pseudogene	-	0	6	0	0.304839
ENSG00000213315	-5.50827	45.5148	0.0409646	0.654631	AL122020.1	14	90766531	90766989	+	459	processed_pseudogene	ribosomal protein S18 (RPS18) pseudogene	-	0	6	0	0.658825
ENSG00000155714	5.73002	53.0772	0.0409646	0.654631	PDZD9	16	21983865	22001110	-	1331	protein_coding	PDZ domain containing 9 [Source:HGNC Symbol;Acc:HGNC:28740]	-	6	0	0.266399	0
ENSG00000232613	-5.50827	45.5148	0.0409646	0.654631	LINC02576	2	65030727	65053017	+	1133	antisense	long intergenic non-protein coding RNA 2576 [Source:HGNC Symbol;Acc:HGNC:53748]	-	0	6	0	0.266903
ENSG00000232377	-5.50827	45.5148	0.0409646	0.654631	AC016910.1	2	143937073	143964156	+	1046	antisense	uncharacterized LOC101928386 [Source:NCBI gene;Acc:101928386]	-	0	6	0	0.289102
ENSG00000271825	-5.50827	45.5148	0.0409646	0.654631	AC019080.3	2	177300600	177302006	+	444	antisense	novel transcript, antisense to NFE2L2	-	0	6	0	0.681083
ENSG00000253865	-5.50827	45.5148	0.0409646	0.654631	AC131025.1	5	149372174	149375116	+	588	antisense	novel transcript	-	0	6	0	0.514287
ENSG00000238024	5.73002	53.0772	0.0409646	0.654631	DDX39BP2	6	29993209	29993605	+	258	unprocessed_pseudogene	DEAD-box helicase 39B pseudogene 2 [Source:HGNC Symbol;Acc:HGNC:33461]	-	6	0	1.37433	0
ENSG00000254273	-5.50827	45.5148	0.0409646	0.654631	AC018620.1	8	73511276	73511654	-	379	processed_pseudogene	chromatin accessibility complex protein 1 (CHRAC1) pseudogene	-	0	6	0	0.797891
ENSG00000259713	5.73002	53.0772	0.0409646	0.654631	AC013391.2	15	89518523	89591956	+	501	sense_overlapping	novel transcript	-	6	0	0.707737	0
ENSG00000228784	-5.50827	45.5148	0.0409646	0.654631	LINC00954	2	19868860	19885047	+	4808	lincRNA	long intergenic non-protein coding RNA 954 [Source:HGNC Symbol;Acc:HGNC:48668]	-	0	6	0	0.0628953
ENSG00000249515	-5.50827	45.5148	0.0409646	0.654631	LINC02113	5	99549432	99577957	+	336	lincRNA	long intergenic non-protein coding RNA 2113 [Source:HGNC Symbol;Acc:HGNC:52967]	-	0	6	0	0.900002
ENSG00000251898	-5.50827	45.5148	0.0409646	0.654631	SCARNA11	12	6581474	6581609	-	136	scaRNA	small Cajal body-specific RNA 11 [Source:HGNC Symbol;Acc:HGNC:32568]	-	0	6	0	2.22353
ENSG00000257957	-5.50827	45.5148	0.0409646	0.654631	QRSL1P3	14	35765795	35767110	+	1316	processed_pseudogene	glutaminyl-tRNA synthase (glutamine-hydrolyzing)-like 1 pseudogene 3 [Source:HGNC Symbol;Acc:HGNC:43669]	-	0	6	0	0.229788
ENSG00000249026	-5.50827	45.5148	0.0409646	0.654631	CTNNA1P1	5	115389643	115392370	-	2728	processed_pseudogene	catenin alpha 1 pseudogene 1 [Source:HGNC Symbol;Acc:HGNC:2513]	-	0	6	0	0.110851
ENSG00000283636	-5.50827	45.5148	0.0409646	0.654631	RF00017	2	63168600	63168847	+	248	misc_RNA		-	0	6	0	1.21936
ENSG00000207922	-5.50827	45.5148	0.0409646	0.654631	MIR566	3	50173326	50173419	+	94	miRNA	microRNA 566 [Source:HGNC Symbol;Acc:HGNC:32822]	-	0	6	0	3.21703
ENSG00000279098	-5.50827	45.5148	0.0409646	0.654631	AC097460.3	4	99942081	99942522	-	442	TEC	TEC	-	0	6	0	0.684164
ENSG00000146374	-5.50827	45.5148	0.0409646	0.654631	RSPO3	6	127118604	127197765	+	3179	protein_coding	R-spondin 3 [Source:HGNC Symbol;Acc:HGNC:20866]	-	0	6	0	0.0951245
ENSG00000233998	-5.50827	45.5148	0.0409646	0.654631	SETP5	9	137640986	137641547	-	562	processed_pseudogene	SET pseudogene 5 [Source:HGNC Symbol;Acc:HGNC:42924]	-	0	6	0	0.538079
ENSG00000162706	-5.50827	45.5148	0.0409646	0.654631	CADM3	1	159171609	159203313	+	3847	protein_coding	cell adhesion molecule 3 [Source:HGNC Symbol;Acc:HGNC:17601]	-	0	6	0	0.0786069
ENSG00000201496	-5.50827	45.5148	0.0409646	0.654631	RN7SKP275	4	5458581	5458881	-	301	misc_RNA	RNA, 7SK small nuclear pseudogene 275 [Source:HGNC Symbol;Acc:HGNC:45999]	-	0	6	0	1.00465
ENSG00000250122	-5.50827	45.5148	0.0409646	0.654631	AC122694.1	5	45890216	45895970	+	563	lincRNA	novel transcript	-	0	6	0	0.537124
ENSG00000248943	-5.50827	45.5148	0.0409646	0.654631	AC140125.1	5	177801204	177803344	-	684	lincRNA	novel transcript	-	0	6	0	0.442106
ENSG00000224658	-5.50827	45.5148	0.0409646	0.654631	AL513164.1	6	148237585	148283408	-	311	antisense	novel transcript	-	0	6	0	0.972349
ENSG00000233219	-5.50827	45.5148	0.0409646	0.654631	AC008080.3	7	33868501	33874231	-	380	lincRNA	novel transcript	-	0	6	0	0.795791
ENSG00000276405	-5.50827	45.5148	0.0409646	0.654631	TRBV13	7	142535809	142536292	+	374	TR_V_gene	T cell receptor beta variable 13 [Source:HGNC Symbol;Acc:HGNC:12188]	-	0	6	0	0.808558
ENSG00000165509	-5.50827	45.5148	0.0409646	0.654631	MAGEC3	X	141838316	141897832	+	2763	protein_coding	MAGE family member C3 [Source:HGNC Symbol;Acc:HGNC:23798]	-	0	6	0	0.109446
ENSG00000253681	-5.50827	45.5148	0.0409646	0.654631	AC013509.1	8	76576551	76579345	-	339	sense_intronic	novel transcript	-	0	6	0	0.892037
ENSG00000255028	-5.50827	45.5148	0.0409646	0.654631	AP003049.2	11	109355085	109583907	-	1091	antisense	novel transcript, antisense to C11orf87	-	0	6	0	0.277178
ENSG00000258871	-5.50827	45.5148	0.0409646	0.654631	AC004828.1	14	72552580	72595125	-	654	lincRNA	novel transcript	-	0	6	0	0.462386
ENSG00000260517	-5.50827	45.5148	0.0409646	0.654631	AC009093.2	16	29139661	29216706	+	2488	lincRNA	novel transcript	-	0	6	0	0.121544
ENSG00000283209	-5.50827	45.5148	0.0409646	0.654631	AC106858.1	17	56803841	56804269	-	429	sense_intronic	novel transcript, sense intronic to C17orf67	-	0	6	0	0.704897
ENSG00000267112	-5.50827	45.5148	0.0409646	0.654631	AC098848.1	18	54885866	54898083	-	567	antisense	novel transcript, antisense to RAB27B	-	0	6	0	0.533335
ENSG00000101251	-5.50827	45.5148	0.0409646	0.654631	SEL1L2	20	13849247	13996443	-	3887	protein_coding	SEL1L2, ERAD E3 ligase adaptor subunit [Source:HGNC Symbol;Acc:HGNC:15897]	-	0	6	0	0.077798
ENSG00000230133	5.73002	53.0772	0.0409646	0.654631	LINC01721	20	24199767	24224588	+	2376	lincRNA	long intergenic non-protein coding RNA 1721 [Source:HGNC Symbol;Acc:HGNC:52508]	-	6	0	0.149233	0
ENSG00000281460	5.73002	53.0772	0.0409646	0.654631	AL049541.2	20	48476999	48477553	+	555	lincRNA	novel transcript	-	6	0	0.638876	0
ENSG00000279998	-5.50827	45.5148	0.0409646	0.654631	FP475955.3	21	6789592	6812297	+	1612	lincRNA	novel transcript	-	0	6	0	0.187593
ENSG00000226496	-5.50827	45.5148	0.0409646	0.654631	LINC00323	21	41141493	41148133	-	2439	antisense	long intergenic non-protein coding RNA 323 [Source:HGNC Symbol;Acc:HGNC:19720]	-	0	6	0	0.123986
ENSG00000275166	-5.50827	45.5148	0.0409646	0.654631	MIR6814	21	41746772	41746841	-	70	miRNA	microRNA 6814 [Source:HGNC Symbol;Acc:HGNC:50145]	-	0	6	0	4.32001
ENSG00000165949	-1.39563	2.63104	0.0409935	0.654631	IFI27	14	94104836	94116698	+	4147	protein_coding	interferon alpha inducible protein 27 [Source:HGNC Symbol;Acc:HGNC:5397]	-	10	31	0.142503	0.376755
ENSG00000143858	-2.29391	4.90382	0.041032	0.654631	SYT2	1	202590596	202710417	-	7774	protein_coding	synaptotagmin 2 [Source:HGNC Symbol;Acc:HGNC:11510]	-	2	12	0.0152035	0.077798
ENSG00000250999	2.47073	5.54324	0.041032	0.654631	AC136604.3	5	179657762	179664432	+	821	antisense	novel transcript	-	10	2	0.719806	0.122777
ENSG00000188693	-2.29391	4.90382	0.041032	0.654631	CYP51A1-AS1	7	92134604	92180725	+	2957	antisense	CYP51A1 antisense RNA 1 [Source:HGNC Symbol;Acc:HGNC:50694]	-	2	12	0.0399703	0.204532
ENSG00000210112	-2.29391	4.90382	0.041032	0.654631	MT-TM	MT	4402	4469	+	68	Mt_tRNA	mitochondrially encoded tRNA methionine [Source:HGNC Symbol;Acc:HGNC:7492]	-	2	12	1.73812	8.89414
ENSG00000267980	-2.29391	4.90382	0.041032	0.654631	AC007292.1	19	4363789	4364640	+	746	antisense	novel transcript, antisense to SH3GL1	-	2	12	0.158435	0.810726
ENSG00000217258	-2.29391	4.90382	0.041032	0.654631	AC007249.1	2	10452319	10455552	+	494	lincRNA	novel transcript	-	2	12	0.239255	1.22429
ENSG00000271452	-2.29391	4.90382	0.041032	0.654631	AC005034.5	2	75669989	75670454	+	466	sense_intronic	novel transcript, sense intronic to MRPL19	-	2	12	0.253631	1.29786
ENSG00000260369	-2.29391	4.90382	0.041032	0.654631	AC120024.1	17	80453735	80454729	-	995	lincRNA	novel transcript	-	2	12	0.118786	0.607841
ENSG00000272800	-2.29391	4.90382	0.041032	0.654631	AC021851.1	2	183214319	183215400	+	1082	lincRNA	novel transcript	-	2	12	0.109235	0.558966
ENSG00000241007	-2.29391	4.90382	0.041032	0.654631	SEPT7P6	7	152367519	152368661	+	1143	processed_pseudogene	septin 7 pseudogene 6 [Source:HGNC Symbol;Acc:HGNC:38042]	-	2	12	0.103405	0.529135
ENSG00000272195	-2.29391	4.90382	0.041032	0.654631	AL356512.1	1	244969350	244971088	-	1739	antisense	novel transcript, antisense to EFCAB2	-	2	12	0.0679656	0.347787
ENSG00000247151	-2.29391	4.90382	0.041032	0.654631	CSTF3-DT	11	33161657	33191598	+	4012	processed_transcript	CSTF3 divergent transcript [Source:HGNC Symbol;Acc:HGNC:27882]	-	2	12	0.0294597	0.150748
ENSG00000258365	-2.29391	4.90382	0.041032	0.654631	AC073655.2	12	94277758	94282844	-	1116	antisense	novel transcript, antisense to PLXNC1	-	2	12	0.105907	0.541937
ENSG00000213780	-2.29391	4.90382	0.041032	0.654631	GTF2H4	6	30908184	30914106	+	2353	protein_coding	general transcription factor IIH subunit 4 [Source:HGNC Symbol;Acc:HGNC:4658]	-	2	12	0.0502304	0.257034
ENSG00000280033	-2.29391	4.90382	0.041032	0.654631	AC116407.4	17	32159311	32160371	+	1061	TEC	TEC	-	2	12	0.111397	0.57003
ENSG00000233539	-2.29391	4.90382	0.041032	0.654631	AC011294.1	7	46673785	46759851	-	2791	lincRNA	uncharacterized LOC730338 [Source:NCBI gene;Acc:730338]	-	2	12	0.0423476	0.216697
ENSG00000254433	-2.29391	4.90382	0.041032	0.654631	AP001001.1	11	106085990	106101975	-	1247	antisense	novel transcript	-	2	12	0.0947812	0.485005
ENSG00000218073	2.47073	5.54324	0.041032	0.654631	AL021407.3	6	16160926	16161411	+	486	processed_pseudogene	PERP, TP53 apoptosis effector (PERP) pseudogene	-	10	2	1.21597	0.207408
ENSG00000248290	-2.29391	4.90382	0.041032	0.654631	TNXA	6	32008614	32012472	-	2038	unprocessed_pseudogene	tenascin XA (pseudogene) [Source:HGNC Symbol;Acc:HGNC:11975]	-	2	12	0.0579942	0.296762
ENSG00000173838	2.47073	5.54324	0.041032	0.654631	2022-03-10	17	62701314	62808344	-	4920	protein_coding	membrane associated ring-CH-type finger 10 [Source:HGNC Symbol;Acc:HGNC:26655]	-	10	2	0.120114	0.0204878
ENSG00000265766	-2.29391	4.90382	0.041032	0.654631	CXADRP3	18	14477955	14499278	-	1955	transcribed_processed_pseudogene	CXADR pseudogene 3 [Source:HGNC Symbol;Acc:HGNC:33974]	-	2	12	0.0604563	0.309361
ENSG00000169330	1.18441	2.2727	0.0415351	0.661299	KIAA1024	15	79432516	79472290	+	6800	protein_coding	KIAA1024 [Source:HGNC Symbol;Acc:HGNC:29172]	-	39	20	0.338933	0.148236
ENSG00000223947	-1.14296	2.20834	0.0416529	0.66227	AC016738.1	2	100993676	101002244	-	3485	antisense	novel transcript	-	22	57	0.37306	0.824335
ENSG00000105967	-1.14296	2.20834	0.0416529	0.66227	TFEC	7	115935148	116159896	-	8644	protein_coding	transcription factor EC [Source:HGNC Symbol;Acc:HGNC:11754]	bHLH	22	57	0.150406	0.332347
ENSG00000187796	1.39985	2.63875	0.041904	0.664901	CARD9	9	136361903	136373681	-	6699	protein_coding	caspase recruitment domain family member 9 [Source:HGNC Symbol;Acc:HGNC:16391]	-	25	11	0.220541	0.0827588
ENSG00000249279	-1.45003	2.73213	0.041904	0.664901	LINC02057	5	61201309	61264929	-	1036	lincRNA	long intergenic non-protein coding RNA 2057 [Source:HGNC Symbol;Acc:HGNC:52900]	-	9	29	0.513383	1.41081
ENSG00000198520	-1.08159	2.11637	0.0422141	0.667549	ARMH1	1	44674692	44725591	+	3290	protein_coding	armadillo-like helical domain containing 1 [Source:HGNC Symbol;Acc:HGNC:34345]	-	27	67	0.484983	1.02639
ENSG00000128203	-1.02762	2.03866	0.0426331	0.672807	ASPHD2	22	26429273	26445015	+	3357	protein_coding	aspartate beta-hydroxylase domain containing 2 [Source:HGNC Symbol;Acc:HGNC:30437]	-	36	86	0.633738	1.29116
ENSG00000267510	-1.00785	2.01091	0.0426745	0.673004	AC011451.1	19	9291515	9294482	+	405	antisense	novel transcript, antisense to ZNF699	-	45	106	6.56623	13.1911
ENSG00000164920	-1.51508	2.85814	0.0428142	0.674294	OSR2	8	98944403	98952104	+	2930	protein_coding	odd-skipped related transciption factor 2 [Source:HGNC Symbol;Acc:HGNC:15830]	zf-C2H2	8	27	0.161354	0.464438
ENSG00000124215	-1.51508	2.85814	0.0428142	0.674294	CDH26	20	59958427	60034011	+	5748	protein_coding	cadherin 26 [Source:HGNC Symbol;Acc:HGNC:15902]	-	8	27	0.0822492	0.236744
ENSG00000231351	1.26153	2.39751	0.0436842	0.68042	AC111200.2	2	86930250	86930754	-	505	processed_pseudogene	WW domain binding protein 1 (WBP1) pseudogene	-	35	17	4.09577	1.69664
ENSG00000158445	1.1797	2.2653	0.0436842	0.68042	KCNB1	20	49293394	49484297	-	17733	protein_coding	potassium voltage-gated channel subfamily B member 1 [Source:HGNC Symbol;Acc:HGNC:6231]	-	35	18	0.116639	0.051159
ENSG00000233868	-1.21799	2.32623	0.0436842	0.68042	AC009302.1	2	221944223	221944612	+	390	processed_pseudogene	chromosome 12 open reading frame 31 (C12orf31) pseudogene	-	15	41	2.27293	5.29847
ENSG00000169918	1.43521	2.70421	0.043693	0.68042	OTUD7A	15	31475398	31870789	-	14331	protein_coding	OTU deubiquitinase 7A [Source:HGNC Symbol;Acc:HGNC:20718]	-	21	9	0.0865967	0.0316517
ENSG00000214391	1.43521	2.70421	0.043693	0.68042	TUBAP2	11	90282560	90284172	+	1613	processed_pseudogene	tubulin alpha pseudogene 2 [Source:HGNC Symbol;Acc:HGNC:14531]	-	21	9	0.769385	0.281216
ENSG00000214510	-1.59434	3.01956	0.043693	0.68042	SPINK13	5	148268180	148286254	+	1174	protein_coding	serine peptidase inhibitor, Kazal type 13 (putative) [Source:HGNC Symbol;Acc:HGNC:27200]	-	7	25	0.352362	1.07326
ENSG00000135914	-1.95548	3.87845	0.0439913	0.68042	HTR2B	2	231108230	231125118	-	2246	protein_coding	5-hydroxytryptamine receptor 2B [Source:HGNC Symbol;Acc:HGNC:5294]	-	3	14	0.0789351	0.314159
ENSG00000284773	-1.95548	3.87845	0.0439913	0.68042	AC114490.3	1	34974356	34985313	-	3163	protein_coding	novel protein	-	3	14	0.0560507	0.22308
ENSG00000214967	-1.95548	3.87845	0.0439913	0.68042	NPIPA7	16	16379055	16393954	+	1401	protein_coding	nuclear pore complex interacting protein family member A7 [Source:HGNC Symbol;Acc:HGNC:41982]	-	3	14	0.126544	0.503641
ENSG00000198658	2.17675	4.52133	0.0439913	0.68042	ABHD17AP1	1	148146395	148149566	+	933	unprocessed_pseudogene	abhydrolase domain containing 17A pseudogene 1 [Source:HGNC Symbol;Acc:HGNC:28394]	-	12	3	0.760078	0.162058
ENSG00000252743	-1.95548	3.87845	0.0439913	0.68042	RNU6-850P	6	31756951	31757053	-	103	snRNA	RNA, U6 small nuclear 850, pseudogene [Source:HGNC Symbol;Acc:HGNC:47813]	-	3	14	1.72124	6.8505
ENSG00000231010	-1.95548	3.87845	0.0439913	0.68042	AL121672.1	22	46055740	46058160	-	1181	lincRNA	novel transcript	-	3	14	0.150117	0.597461
ENSG00000267064	-1.95548	3.87845	0.0439913	0.68042	UXT-AS1	X	47658833	47660377	+	1545	antisense	UXT antisense RNA 1 [Source:HGNC Symbol;Acc:HGNC:49239]	-	3	14	0.11475	0.4567
ENSG00000228150	2.17675	4.52133	0.0439913	0.68042	AL357140.2	1	9942923	9949974	+	440	sense_intronic	novel transcript	-	12	3	1.61171	0.343637
ENSG00000241975	-1.95548	3.87845	0.0439913	0.68042	ELOCP19	1	88829102	88829419	+	318	processed_pseudogene	elongin C pseudogene 19 [Source:HGNC Symbol;Acc:HGNC:38155]	-	3	14	0.55751	2.21887
ENSG00000247728	-1.95548	3.87845	0.0439913	0.68042	AC091057.2	15	30616998	30625773	-	970	antisense	novel transcript, antisense to ARHGAP11B	-	3	14	0.182771	0.727424
ENSG00000275479	-1.95548	3.87845	0.0439913	0.68042	AC087741.2	17	80149627	80149798	+	172	lincRNA	novel transcript	-	3	14	1.03075	4.10233
ENSG00000254756	-1.95548	3.87845	0.0439913	0.68042	AP001107.6	11	66334494	66339875	+	516	antisense	novel transcript	-	3	14	0.343582	1.36744
ENSG00000251000	-1.95548	3.87845	0.0439913	0.68042	AC008592.3	5	95834424	95835046	-	418	processed_pseudogene	gamma-glutamyl cyclotransferase (GGCT) pseudogene	-	3	14	0.424134	1.68804
ENSG00000277215	2.17675	4.52133	0.0439913	0.68042	SPANXA2-OT1	X	141502849	141649927	+	1686	lincRNA	SPANXA2 overlapping transcript 1 [Source:HGNC Symbol;Acc:HGNC:31683]	-	12	3	0.420613	0.0896799
ENSG00000277249	-1.95548	3.87845	0.0439913	0.68042	MIR6784	17	45114367	45114433	-	67	miRNA	microRNA 6784 [Source:HGNC Symbol;Acc:HGNC:49988]	-	3	14	2.64609	10.5314
ENSG00000147614	2.17675	4.52133	0.0439913	0.68042	ATP6V0D2	8	85987323	86154228	+	3010	protein_coding	ATPase H+ transporting V0 subunit d2 [Source:HGNC Symbol;Acc:HGNC:18266]	-	12	3	0.235599	0.0502327
ENSG00000255031	-1.08047	2.11473	0.0440851	0.680967	AP002807.1	11	68050740	68053762	+	1209	antisense	novel transcript, antisense to CHKA	-	25	62	1.222	2.58462
ENSG00000124614	-1.08047	2.11473	0.0440851	0.680967	RPS10	6	34417454	34426125	-	2358	protein_coding	ribosomal protein S10 [Source:HGNC Symbol;Acc:HGNC:10383]	-	25	62	0.626549	1.32519
ENSG00000281344	-1.08256	2.11778	0.0442321	0.681071	HELLPAR	12	102197585	102402596	+	205012	macro_lncRNA	HELLP associated long non-coding RNA [Source:HGNC Symbol;Acc:HGNC:43984]	-	29	72	0.00835944	0.0177005
ENSG00000272168	-1.62947	3.094	0.0444891	0.681071	CASC15	6	21664772	22368328	+	13289	lincRNA	cancer susceptibility 15 [Source:HGNC Symbol;Acc:HGNC:28245]	-	6	22	0.0266819	0.0834376
ENSG00000226314	-1.69322	3.23378	0.0444891	0.681071	ZNF192P1	6	28161769	28169594	+	2547	transcribed_unprocessed_pseudogene	zinc finger protein 192 pseudogene 1 [Source:HGNC Symbol;Acc:HGNC:18777]	-	6	23	0.139213	0.455125
ENSG00000118292	-1.69322	3.23378	0.0444891	0.681071	C1orf54	1	150268200	150280916	+	1351	protein_coding	chromosome 1 open reading frame 54 [Source:HGNC Symbol;Acc:HGNC:26258]	-	6	23	0.262455	0.858033
ENSG00000201512	-1.62947	3.094	0.0444891	0.681071	SNORA71C	20	38429670	38429803	-	134	snoRNA	small nucleolar RNA, H/ACA box 71C [Source:HGNC Symbol;Acc:HGNC:32656]	-	6	22	2.64609	8.27464
ENSG00000261879	-1.69322	3.23378	0.0444891	0.681071	AC087500.1	17	5192084	5248069	+	2324	antisense	uncharacterized LOC100130950 [Source:NCBI gene;Acc:100130950]	-	6	23	0.152572	0.498796
ENSG00000273102	-1.62947	3.094	0.0444891	0.681071	AP000569.1	21	33967101	33968573	-	591	lincRNA	novel transcript	-	6	22	0.59996	1.87615
ENSG00000234055	-1.69322	3.23378	0.0444891	0.681071	AL158151.2	9	129097854	129100266	+	241	antisense	novel transcript	-	6	23	1.47127	4.80997
ENSG00000170835	-1.24483	2.36991	0.044879	0.681071	CEL	9	133061978	133071861	+	2384	protein_coding	carboxyl ester lipase [Source:HGNC Symbol;Acc:HGNC:1848]	-	14	39	0.347041	0.824498
ENSG00000260329	-1.09189	2.13153	0.0451174	0.681071	AC007541.1	12	106954029	106955497	-	1469	antisense	novel transcript, antisense to C12orf23	-	24	60	0.965491	2.05855
ENSG00000107099	-1.75046	3.36465	0.0451175	0.681071	DOCK8	9	214854	465259	+	13784	protein_coding	dedicator of cytokinesis 8 [Source:HGNC Symbol;Acc:HGNC:19191]	-	5	20	0.0214365	0.0731284
ENSG00000251580	-1.75046	3.36465	0.0451175	0.681071	LINC02482	4	6648696	6673896	-	1167	lincRNA	long intergenic non-protein coding RNA 2482 [Source:HGNC Symbol;Acc:HGNC:53458]	-	5	20	0.253197	0.863755
ENSG00000170482	-1.75046	3.36465	0.0451175	0.681071	SLC23A1	5	139367196	139384553	-	3203	protein_coding	solute carrier family 23 member 1 [Source:HGNC Symbol;Acc:HGNC:10974]	-	5	20	0.0922511	0.314706
ENSG00000261342	1.57063	2.97034	0.0451175	0.681071	AC006538.1	19	2727743	2729327	-	1585	sense_intronic	novel transcript	-	18	7	0.671123	0.222587
ENSG00000111254	-1.75046	3.36465	0.0451175	0.681071	AKAP3	12	4615508	4649047	-	3668	protein_coding	A-kinase anchoring protein 3 [Source:HGNC Symbol;Acc:HGNC:373]	-	5	20	0.0805563	0.27481
ENSG00000259728	-1.75046	3.36465	0.0451175	0.681071	LINC00933	15	84570649	84580175	+	3000	transcribed_unprocessed_pseudogene	long intergenic non-protein coding RNA 933 [Source:HGNC Symbol;Acc:HGNC:48625]	-	5	20	0.0984935	0.336001
ENSG00000003147	-1.74477	3.35141	0.0452022	0.681071	ICA1	7	8113184	8262687	-	4891	protein_coding	islet cell autoantigen 1 [Source:HGNC Symbol;Acc:HGNC:5343]	-	4	16	0.0483305	0.164875
ENSG00000188763	1.68524	3.21594	0.0452022	0.681071	FZD9	7	73433783	73436120	+	2338	protein_coding	frizzled class receptor 9 [Source:HGNC Symbol;Acc:HGNC:4047]	-	14	5	0.353869	0.107785
ENSG00000117643	1.99773	3.99372	0.0452022	0.681071	MAN1C1	1	25617468	25786207	+	9026	protein_coding	mannosidase alpha class 1C member 1 [Source:HGNC Symbol;Acc:HGNC:19080]	-	14	4	0.0916624	0.0223355
ENSG00000105409	1.68524	3.21594	0.0452022	0.681071	ATP1A3	19	41966582	41997497	-	5989	protein_coding	ATPase Na+/K+ transporting subunit alpha 3 [Source:HGNC Symbol;Acc:HGNC:801]	-	14	5	0.138144	0.0420772
ENSG00000247317	1.68524	3.21594	0.0452022	0.681071	LY6E-DT	8	142981738	143018437	-	3853	lincRNA	LY6E divergent transcript [Source:HGNC Symbol;Acc:HGNC:53728]	-	14	5	0.214727	0.0654037
ENSG00000204173	-1.74477	3.35141	0.0452022	0.681071	LRRC37A5P	9	111602831	111631289	-	2324	transcribed_unprocessed_pseudogene	leucine rich repeat containing 37 member A5, pseudogene [Source:HGNC Symbol;Acc:HGNC:23369]	-	4	16	0.101714	0.346989
ENSG00000269925	-1.74477	3.35141	0.0452022	0.681071	Z98884.2	1	7776383	7776775	+	393	sense_intronic	novel transcript, sense intronic to VAMP3	-	4	16	0.601487	2.05191
ENSG00000272523	1.68524	3.21594	0.0452022	0.681071	LINC01023	5	108727825	108728260	-	436	lincRNA	long intergenic non-protein coding RNA 1023 [Source:HGNC Symbol;Acc:HGNC:49004]	-	14	5	1.89758	0.577983
ENSG00000204261	-1.74477	3.35141	0.0452022	0.681071	PSMB8-AS1	6	32844086	32846495	+	1951	lincRNA	PSMB8 antisense RNA 1 (head to head) [Source:HGNC Symbol;Acc:HGNC:39758]	-	4	16	0.121161	0.413327
ENSG00000244675	1.68524	3.21594	0.0452022	0.681071	AC108676.1	3	194496317	194501503	-	2969	sense_overlapping	novel transcript, sense overlapping to ATP13A3	-	14	5	0.278661	0.0848772
ENSG00000279662	-1.74477	3.35141	0.0452022	0.681071	AC131649.2	16	10445309	10449747	-	4439	TEC	TEC	-	4	16	0.0532517	0.181663
ENSG00000276649	1.99773	3.99372	0.0452022	0.681071	AL117335.1	20	1888128	1894374	-	1607	antisense	uncharacterized LOC102724545 [Source:NCBI gene;Acc:102724545]	-	14	4	0.514838	0.125451
ENSG00000226318	-1.74477	3.35141	0.0452022	0.681071	RPS3AP38	10	67960702	67961464	-	763	processed_pseudogene	ribosomal protein S3a pseudogene 38 [Source:HGNC Symbol;Acc:HGNC:36145]	-	4	16	0.309809	1.05688
ENSG00000232110	-1.74477	3.35141	0.0452022	0.681071	AL353751.1	10	89283765	89292125	+	1012	antisense	novel transcript, antisense to LIPA	-	4	16	0.233581	0.79684
ENSG00000174226	-1.74477	3.35141	0.0452022	0.681071	SNX31	8	100572882	100663415	-	3149	protein_coding	sorting nexin 31 [Source:HGNC Symbol;Acc:HGNC:28605]	-	4	16	0.0750665	0.256082
ENSG00000258910	-1.74477	3.35141	0.0452022	0.681071	LINC01956	2	118766965	118835110	-	1110	lincRNA	long intergenic non-protein coding RNA 1956 [Source:HGNC Symbol;Acc:HGNC:52777]	-	4	16	0.212959	0.726488
ENSG00000277631	-1.74477	3.35141	0.0452022	0.681071	PGM5P3-AS1	9	72674	88826	+	2003	lincRNA	PGM5P3 antisense RNA 1 [Source:HGNC Symbol;Acc:HGNC:51194]	-	4	16	0.118015	0.402597
ENSG00000182742	-1.74477	3.35141	0.0452022	0.681071	HOXB4	17	48575513	48580111	-	3757	protein_coding	homeobox B4 [Source:HGNC Symbol;Acc:HGNC:5115]	Homeobox	4	16	0.0629184	0.21464
ENSG00000211764	1.99773	3.99372	0.0452022	0.681071	TRBJ2-1	7	142796365	142796414	+	50	TR_J_gene	T cell receptor beta joining 2-1 [Source:HGNC Symbol;Acc:HGNC:12168]	-	14	4	16.5469	4.03201
ENSG00000278156	1.6197	3.07312	0.045436	0.682388	TSC22D1-AS1	13	44575893	44580432	+	3457	antisense	TSC22D1 antisense RNA 1 [Source:HGNC Symbol;Acc:HGNC:43684]	-	16	6	0.273514	0.0874749
ENSG00000265943	1.6197	3.07312	0.045436	0.682388	AC090912.1	18	22699481	22933764	-	570	antisense	novel transcript, antisense to RBBP8	-	16	6	1.65884	0.530527
ENSG00000221887	-1.01395	2.01943	0.0455324	0.683396	HMSD	18	63949301	63981774	+	2920	protein_coding	histocompatibility minor serpin domain containing [Source:HGNC Symbol;Acc:HGNC:23037]	-	41	97	0.829774	1.67425
ENSG00000170681	-1.27516	2.42026	0.0461633	0.691085	CAVIN4	9	100578079	100587906	+	2615	protein_coding	caveolae associated protein 4 [Source:HGNC Symbol;Acc:HGNC:33742]	-	13	37	0.293785	0.713118
ENSG00000285825	-1.27516	2.42026	0.0461633	0.691085	AP003501.3	11	124950331	124953555	-	952	lincRNA	novel transcript	-	13	37	0.806984	1.95883
ENSG00000205220	1.11147	2.16066	0.046223	0.691153	PSMB10	16	67934502	67937087	-	1853	protein_coding	proteasome subunit beta 10 [Source:HGNC Symbol;Acc:HGNC:9538]	-	50	27	1.59461	0.734378
ENSG00000213977	1.1509	2.22052	0.0472123	0.703626	TAX1BP3	17	3662896	3668682	-	1383	protein_coding	Tax1 binding protein 3 [Source:HGNC Symbol;Acc:HGNC:30684]	-	40	21	1.70921	0.765295
ENSG00000196209	-1.05994	2.08485	0.047268	0.704006	SIRPB2	20	1470741	1491587	-	5034	protein_coding	signal regulatory protein beta 2 [Source:HGNC Symbol;Acc:HGNC:16247]	-	27	66	0.316963	0.660788
ENSG00000239523	-1.11749	2.16969	0.0474097	0.705666	MYLK-AS1	3	123585542	123644568	+	980	antisense	MYLK antisense RNA 1 [Source:HGNC Symbol;Acc:HGNC:42440]	-	22	56	1.32665	2.88001
ENSG00000164796	-1.26806	2.40837	0.0475441	0.706764	CSMD3	8	112222928	113437099	-	20567	protein_coding	CUB and Sushi multiple domains 3 [Source:HGNC Symbol;Acc:HGNC:19291]	-	12	34	0.0344801	0.0833181
ENSG00000176826	-1.01699	2.02369	0.047604	0.707203	FKBP9P1	7	55681074	55713252	-	3458	transcribed_unprocessed_pseudogene	FK506 binding protein 9 pseudogene 1 [Source:HGNC Symbol;Acc:HGNC:23568]	-	35	83	0.598138	1.20972
ENSG00000231439	-1.06985	2.09922	0.0484199	0.715248	WASIR2	16	22910	25123	+	1054	lincRNA	WASH and IL9R antisense RNA 2 [Source:HGNC Symbol;Acc:HGNC:38609]	-	26	64	1.45778	3.06035
ENSG00000067601	1.09739	2.13967	0.0484199	0.715248	PMS2P4	7	67295608	67302907	-	1060	transcribed_unprocessed_pseudogene	PMS1 homolog 2, mismatch repair system component pseudogene 4 [Source:HGNC Symbol;Acc:HGNC:9129]	-	55	30	3.06631	1.42642
ENSG00000280193	1.05029	2.07095	0.0484199	0.715248	AC132219.2	8	81696368	81698694	+	2327	TEC	TEC	-	55	31	1.39677	0.671424
ENSG00000005379	-1.02354	2.0329	0.0485942	0.715981	TSPOAP1	17	58301228	58328760	-	11354	protein_coding	TSPO associated protein 1 [Source:HGNC Symbol;Acc:HGNC:16831]	-	34	81	0.176966	0.359557
ENSG00000268996	1.10192	2.14641	0.0486862	0.716431	MAN1B1-DT	9	137084946	137086817	-	1872	antisense	MAN1B1 divergent transcript [Source:HGNC Symbol;Acc:HGNC:48715]	-	46	25	1.45215	0.673078
ENSG00000262209	-1.30523	2.47124	0.0490282	0.721008	PCDHGB3	5	141370264	141512979	+	4757	protein_coding	protocadherin gamma subfamily B, 3 [Source:HGNC Symbol;Acc:HGNC:8710]	-	11	32	0.136653	0.339038
ENSG00000268941	-1.06242	2.08843	0.0491311	0.722066	LINC01711	20	58634772	58635738	+	967	lincRNA	long intergenic non-protein coding RNA 1711 [Source:HGNC Symbol;Acc:HGNC:28663]	-	29	71	1.77227	3.70053
ENSG00000198185	-1.03045	2.04266	0.0496441	0.726399	ZNF334	20	46499630	46513559	-	6865	protein_coding	zinc finger protein 334 [Source:HGNC Symbol;Acc:HGNC:15806]	zf-C2H2	33	79	0.284074	0.579987
