# Supplementary material for: Culture of Cancer Cells at Physiological Oxygen Levels Affects Gene Expression in a Cell-Type Specific Manner
Source: Preprints.org preprint supplement (doi:10.20944/preprints202208.0497.v1), 2022-08-29
Supplement: Supplementary file 8 [file Table S4 DEG list SH-SY5Y.xlsx]

## Sheet: DEG SH-SY5Y 18% O2 vs 5% O2 
Gene ID	log2FoldChange	Fold change	pvalue	padj	gene_name	gene_chr	gene_start	gene_end	gene_strand	gene_length	gene_biotype	gene_description	tf_family	Raw readcount 18% O2	Raw readout 5% O2	FPKM 18% O2	FPKM 5% O2
ENSG00000268902	-3.693	12.9331	7.79029e-11	1.93971e-06	CSAG2	X	152708261	152714549	-	1083	protein_coding	CSAG family member 2 [Source:HGNC Symbol;Acc:HGNC:16847]	-	13	152	0.554029	7.18276
ENSG00000232527	5.04216	32.9489	2.50562e-07	0.00311937	AC245595.1	1	144227030	144250288	-	839	lincRNA	uncharacterized LOC107985200 [Source:NCBI gene;Acc:107985200]	-	41	1	2.25548	0.0609978
ENSG00000269821	-2.24922	4.75427	6.08091e-06	0.0504695	KCNQ1OT1	11	2608328	2699994	-	91667	antisense	KCNQ1 opposite strand/antisense transcript 1 [Source:HGNC Symbol;Acc:HGNC:6295]	-	37	158	0.0186297	0.0882105
ENSG00000253317	-3.22969	9.38065	1.44331e-05	0.0898424	AC078906.1	8	72196334	72202269	+	798	lincRNA	novel transcript	-	5	43	0.289191	2.75767
ENSG00000210176	-2.01438	4.04007	2.35301e-05	0.117175	MT-TH	MT	12138	12206	+	69	Mt_tRNA	mitochondrially encoded tRNA histidine [Source:HGNC Symbol;Acc:HGNC:7487]	-	56	203	37.459	150.565
ENSG00000128645	4.38771	20.933	3.36527e-05	0.119723	HOXD1	2	176188579	176190907	+	1975	protein_coding	homeobox D1 [Source:HGNC Symbol;Acc:HGNC:5132]	Homeobox	26	1	0.607609	0.0259125
ENSG00000198237	1.90657	3.74916	3.84363e-05	0.119723	AC131392.1	5	69875271	69920867	+	633	unprocessed_pseudogene	glucuronidase, beta (GUSB) pseudogene	-	285	68	20.7806	5.49771
ENSG00000277459	7.25412	152.654	4.77659e-05	0.119723	AP001527.2	11	102109827	102110457	-	631	lincRNA	novel transcript	-	20	0	1.46291	0
ENSG00000196611	1.90262	3.73891	4.92893e-05	0.119723	MMP1	11	102789920	102798160	-	1970	protein_coding	matrix metallopeptidase 1 [Source:HGNC Symbol;Acc:HGNC:7155]	-	255	61	5.97436	1.58467
ENSG00000260306	-3.47161	11.0932	5.88889e-05	0.119723	AC092375.2	16	21794095	21795759	-	1665	lincRNA	novel transcript	-	3	31	0.083162	0.952849
ENSG00000248213	-2.49389	5.63293	5.93391e-05	0.119723	CICP16	4	118635970	118638782	-	2813	processed_pseudogene	capicua transcriptional repressor pseudogene 16 [Source:HGNC Symbol;Acc:HGNC:38550]	-	10	51	0.164077	0.927848
ENSG00000278879	-4.44739	21.8171	7.35111e-05	0.119723	AP000560.1	11	74830574	74832510	-	1937	TEC	TEC	-	1	22	0.023828	0.581259
ENSG00000203814	-2.15227	4.44525	7.41057e-05	0.119723	HIST2H2BF	1	149782689	149812373	-	3196	protein_coding	histone cluster 2 H2B family member f [Source:HGNC Symbol;Acc:HGNC:24700]	-	22	88	0.317712	1.40913
ENSG00000223374	-7.17912	144.92	7.55368e-05	0.119723	AC005104.1	2	241351340	241353104	-	442	antisense	novel transcript	-	0	17	0	1.96835
ENSG00000267605	-7.17912	144.92	7.55368e-05	0.119723	AC016590.1	19	37265939	37271518	-	2781	lincRNA	novel transcript	-	0	17	0	0.312842
ENSG00000137877	-3.42448	10.7367	8.09767e-05	0.119723	SPTBN5	15	41848144	41894077	-	12338	protein_coding	spectrin beta, non-erythrocytic 5 [Source:HGNC Symbol;Acc:HGNC:15680]	-	3	30	0.0112226	0.124438
ENSG00000160255	3.5724	11.8959	8.1742e-05	0.119723	ITGB2	21	44885953	44931989	-	6797	protein_coding	integrin subunit beta 2 [Source:HGNC Symbol;Acc:HGNC:6155]	-	28	2	0.190133	0.0150588
ENSG00000273983	-2.38604	5.22721	9.78386e-05	0.120808	HIST1H3G	6	26269405	26271815	-	2411	protein_coding	histone cluster 1 H3 family member g [Source:HGNC Symbol;Acc:HGNC:4772]	-	11	52	0.210578	1.10378
ENSG00000278000	-4.38064	20.8307	0.000109596	0.120808	AC139100.2	18	80161752	80162413	+	662	sense_intronic	novel transcript	-	1	21	0.0697204	1.62345
ENSG00000134121	2.31088	4.96186	0.000115634	0.120808	CHL1	3	196596	409417	+	11861	protein_coding	cell adhesion molecule L1 like [Source:HGNC Symbol;Acc:HGNC:1939]	-	67	12	0.260718	0.0517769
ENSG00000243431	-3.71748	13.1545	0.000116677	0.120808	RPL5P30	11	118560690	118561580	+	891	processed_pseudogene	ribosomal protein L5 pseudogene 30 [Source:HGNC Symbol;Acc:HGNC:35837]	-	2	25	0.103602	1.43595
ENSG00000186056	-7.09228	136.454	0.000120499	0.120808	MATN1-AS1	1	30718504	30726827	+	4024	antisense	MATN1 antisense RNA 1 [Source:HGNC Symbol;Acc:HGNC:40364]	-	0	16	0	0.203488
ENSG00000159712	-7.09228	136.454	0.000120499	0.120808	ANKRD18CP	9	97156570	97221235	-	2980	unprocessed_pseudogene	ankyrin repeat domain 18C, pseudogene [Source:HGNC Symbol;Acc:HGNC:43601]	-	0	16	0	0.274777
ENSG00000284738	-2.93361	7.64019	0.000121298	0.120808	AL358472.5	1	153923337	153935240	+	1267	antisense	uncharacterized LOC101928059 [Source:NCBI gene;Acc:101928059]	-	5	35	0.182142	1.41373
ENSG00000230084	-2.67677	6.39421	0.000121298	0.120808	AC006059.1	3	42601963	42654388	-	785	antisense	novel transcript	-	6	35	0.352776	2.28179
ENSG00000210194	-1.9922	3.97844	0.000131857	0.126273	MT-TE	MT	14674	14742	-	69	Mt_tRNA	mitochondrially encoded tRNA glutamic acid [Source:HGNC Symbol;Acc:HGNC:7479]	-	26	93	17.3917	68.978
ENSG00000167244	-1.73651	3.33227	0.000145451	0.134133	IGF2	11	2129112	2149603	-	6979	protein_coding	insulin like growth factor 2 [Source:HGNC Symbol;Acc:HGNC:5466]	-	83	248	0.548912	1.81859
ENSG00000279072	-4.31066	19.8443	0.000164371	0.141633	AC118758.3	7	56809214	56848800	-	24137	lincRNA	novel piRNA host transcript	-	1	20	0.00191221	0.0424056
ENSG00000230409	-1.81908	3.52856	0.00016496	0.141633	TCEA1P2	3	37275693	37276598	+	906	processed_pseudogene	transcription elongation factor A1 pseudogene 2 [Source:HGNC Symbol;Acc:HGNC:29891]	-	48	152	2.44529	8.58602
ENSG00000234998	-2.46155	5.50807	0.00019293	0.154961	AC244453.3	1	121087528	121116676	-	459	antisense	novel transcript, antisense to FCGR1B	-	8	40	0.804443	4.45989
ENSG00000251573	-2.46155	5.50807	0.00019293	0.154961	LINC02106	5	50969217	50970167	-	606	lincRNA	long intergenic non-protein coding RNA 2106 [Source:HGNC Symbol;Acc:HGNC:52961]	-	8	40	0.609306	3.37803
ENSG00000273448	-2.84901	7.20508	0.000211448	0.163051	AC006480.2	7	67333047	67334383	+	1337	lincRNA	novel transcript	-	5	33	0.172606	1.26316
ENSG00000269439	-2.30051	4.92632	0.000221986	0.163051	AC010618.3	19	17488990	17511889	-	2067	lincRNA	novel transcript	-	11	49	0.245624	1.2132
ENSG00000196581	1.79671	3.47428	0.000222649	0.163051	AJAP1	1	4654732	4792534	+	12405	protein_coding	adherens junctions associated protein 1 [Source:HGNC Symbol;Acc:HGNC:30801]	-	171	44	0.636234	0.181523
ENSG00000205572	1.64928	3.13676	0.000241079	0.166909	SERF1B	5	70025247	70043113	+	3051	protein_coding	small EDRK-rich factor 1B [Source:HGNC Symbol;Acc:HGNC:10756]	-	361	103	5.46113	1.72771
ENSG00000205238	-1.9189	3.78135	0.000243382	0.166909	SPDYE2	7	102551232	102562308	+	2072	protein_coding	speedy/RINGO cell cycle regulator family member E2 [Source:HGNC Symbol;Acc:HGNC:33841]	-	25	85	0.556888	2.09945
ENSG00000270130	-4.2371	18.858	0.000248027	0.166909	AC068790.7	12	123960717	123961244	-	528	sense_intronic	novel transcript, sense intronic to CCDC92	-	1	19	0.0874146	1.8416
ENSG00000154545	-1.70987	3.27131	0.000260827	0.170903	MAGED4	X	52184823	52192268	+	4809	protein_coding	MAGE family member D4 [Source:HGNC Symbol;Acc:HGNC:23793]	-	61	179	0.585454	1.90491
ENSG00000223802	1.7317	3.3212	0.000288226	0.178372	CERS1	19	18868545	18896727	-	3753	protein_coding	ceramide synthase 1 [Source:HGNC Symbol;Acc:HGNC:14253]	-	182	49	2.23826	0.668181
ENSG00000251432	-2.45881	5.49765	0.000300744	0.178372	AC108062.1	4	128292751	128519394	+	3283	lincRNA	uncharacterized LOC100507487 [Source:NCBI gene;Acc:100507487]	-	7	35	0.0984113	0.545599
ENSG00000211962	-2.45881	5.49765	0.000300744	0.178372	IGHV1-46	14	106511117	106511856	-	655	IG_V_gene	immunoglobulin heavy variable 1-46 [Source:HGNC Symbol;Acc:HGNC:5554]	-	7	35	0.493258	2.73466
ENSG00000269981	-6.90114	119.523	0.000315208	0.178372	AL627309.7	1	137682	137965	-	284	processed_pseudogene	novel pseudogene	-	0	14	0	2.52282
ENSG00000273369	-6.90114	119.523	0.000315208	0.178372	AC096586.2	4	44693946	44694386	-	441	antisense	novel transcript, antisense to GUF1	-	0	14	0	1.62467
ENSG00000272588	-6.90114	119.523	0.000315208	0.178372	AC139887.4	4	757022	757740	-	719	antisense	novel transcript, antisense to PCGF3	-	0	14	0	0.996496
ENSG00000183889	-2.04713	4.13282	0.000331776	0.183575	PKD1P1	16	16317444	16350590	+	7897	protein_coding	polycystin 1, transient receptor potential channel interacting pseudogene 1 [Source:NCBI gene;Acc:339044]	-	18	67	0.105203	0.434199
ENSG00000227230	-3.53398	11.5834	0.000348534	0.188655	AL606534.1	1	243135898	243140588	+	694	antisense	novel transcript	-	2	22	0.133011	1.62233
ENSG00000261067	-2.75915	6.76996	0.000372105	0.197129	AC109460.3	16	28974804	28990775	+	5296	processed_transcript	novel transcript	-	5	31	0.0435752	0.299564
ENSG00000106258	-3.16258	8.9543	0.000419448	0.21314	CYP3A5	7	99648194	99680026	-	6759	protein_coding	cytochrome P450 family 3 subfamily A member 5 [Source:HGNC Symbol;Acc:HGNC:2638]	-	3	25	0.020486	0.189293
ENSG00000105889	2.96229	7.79359	0.000419448	0.21314	STEAP1B	7	22419444	22727613	-	6478	protein_coding	STEAP family member 1B [Source:HGNC Symbol;Acc:HGNC:41907]	-	27	3	0.192371	0.0237005
ENSG00000213244	-1.96968	3.9168	0.000444487	0.221346	HIST2H3DP1	1	121118195	121118610	-	416	unprocessed_pseudogene	histone cluster 2 H3 family member d pseudogene 1 [Source:HGNC Symbol;Acc:HGNC:43797]	-	19	67	2.10804	8.24248
ENSG00000272690	-6.79515	111.057	0.000517265	0.242536	LINC02018	3	75435348	75457486	+	1862	lincRNA	long intergenic non-protein coding RNA 2018 [Source:HGNC Symbol;Acc:HGNC:52853]	-	0	13	0	0.357306
ENSG00000276633	-6.79515	111.057	0.000517265	0.242536	AJ011931.1	21	45870854	45873345	+	2492	sense_intronic	novel transcript	-	0	13	0	0.266976
ENSG00000267707	-6.79515	111.057	0.000517265	0.242536	AC015961.2	18	37243776	37247506	+	701	antisense	novel transcript, antisense to CELF4	-	0	13	0	0.949078
ENSG00000143858	1.58916	3.00874	0.000526002	0.242536	SYT2	1	202590596	202710417	-	7774	protein_coding	synaptotagmin 2 [Source:HGNC Symbol;Acc:HGNC:11510]	-	269	80	1.59708	0.52665
ENSG00000273295	-1.99387	3.98304	0.000543898	0.246228	AP000350.6	22	23901432	23907068	-	5637	lincRNA	novel transcript	-	17	61	0.139193	0.553807
ENSG00000253919	3.93788	15.3257	0.000575412	0.251354	THAP12P7	8	78760142	78762431	-	2290	processed_pseudogene	THAP domain containing 12 pseudogene 7 [Source:HGNC Symbol;Acc:HGNC:39574]	-	19	1	0.382945	0.0223481
ENSG00000278048	-4.07768	16.8852	0.000575412	0.251354	RF00004	17	43251829	43252019	-	191	snRNA		-	1	17	0.241649	4.55504
ENSG00000253741	2.90811	7.50634	0.000589	0.252854	LNCOC1	8	142702252	142726973	-	5684	antisense	lncRNA associated with ovarian cancer 1 [Source:HGNC Symbol;Acc:HGNC:53947]	-	26	3	0.211124	0.0270112
ENSG00000224713	-1.97007	3.91787	0.000640504	0.270304	AC025165.1	12	57612118	57619638	-	2600	antisense	novel transcript, antisense to ARHGEF25	-	17	60	0.301782	1.18101
ENSG00000151572	2.53558	5.79811	0.000660977	0.272001	ANO4	12	100717526	101128641	+	4997	protein_coding	anoctamin 4 [Source:HGNC Symbol;Acc:HGNC:23837]	-	33	5	0.304805	0.0512079
ENSG00000169436	1.89304	3.71417	0.000676858	0.272001	COL22A1	8	138588235	138914006	-	7830	protein_coding	collagen type XXII alpha 1 chain [Source:HGNC Symbol;Acc:HGNC:22989]	-	75	18	0.442097	0.117649
ENSG00000136167	1.53887	2.90566	0.00070716	0.272001	LCP1	13	46125920	46211871	-	5061	protein_coding	lymphocyte cytosolic protein 1 [Source:HGNC Symbol;Acc:HGNC:6528]	-	276	85	2.51704	0.859526
ENSG00000267586	-3.39725	10.536	0.000739506	0.272001	LINC00907	18	42159283	42691422	+	9813	lincRNA	long intergenic non-protein coding RNA 907 [Source:HGNC Symbol;Acc:HGNC:44327]	-	2	20	0.00940689	0.104305
ENSG00000120051	3.22632	9.35876	0.000739506	0.272001	CFAP58	10	104353764	104455090	+	3548	protein_coding	cilia and flagella associated protein 58 [Source:HGNC Symbol;Acc:HGNC:26676]	-	22	2	0.286192	0.0288485
ENSG00000260296	-2.08548	4.24417	0.000759269	0.272001	AC095057.3	4	40166675	40167831	+	1157	sense_overlapping	novel transcript, overlapping N4BP2	-	12	46	0.478702	2.0347
ENSG00000246922	-1.67925	3.20261	0.000804773	0.272001	UBAP1L	15	65092770	65115197	-	8536	protein_coding	ubiquitin associated protein 1 like [Source:HGNC Symbol;Acc:HGNC:40028]	-	40	115	0.216283	0.689477
ENSG00000279649	-2.1443	4.42079	0.000812684	0.272001	AC020978.9	16	68290087	68292790	-	2704	TEC	novel transcript	-	10	40	0.170691	0.757059
ENSG00000166317	-3.04288	8.24132	0.000829981	0.272001	SYNPO2L	10	73644881	73663803	-	5147	protein_coding	synaptopodin 2 like [Source:HGNC Symbol;Acc:HGNC:23532]	-	3	23	0.026902	0.228692
ENSG00000262223	-6.68076	102.591	0.00085757	0.272001	AC110285.1	17	81375144	81385464	-	2039	lincRNA	uncharacterized LOC100130370 [Source:NCBI gene;Acc:100130370]	-	0	12	0	0.30119
ENSG00000146001	-6.68076	102.591	0.00085757	0.272001	PCDHB18P	5	141234333	141237529	+	3197	transcribed_unprocessed_pseudogene	protocadherin beta 18 pseudogene [Source:HGNC Symbol;Acc:HGNC:14548]	-	0	12	0	0.192095
ENSG00000265939	-6.68076	102.591	0.00085757	0.272001	UBE2CP2	18	22900486	22900995	-	510	processed_pseudogene	ubiquitin conjugating enzyme E2 C pseudogene 2 [Source:HGNC Symbol;Acc:HGNC:43551]	-	0	12	0	1.20417
ENSG00000268678	-6.68076	102.591	0.00085757	0.272001	AC005261.2	19	57350848	57352012	-	1045	antisense	novel transcript, antisense to ZNF304	-	0	12	0	0.587681
ENSG00000248240	-6.68076	102.591	0.00085757	0.272001	AC114956.1	5	43515274	43525310	+	512	antisense	novel transcript	-	0	12	0	1.19947
ENSG00000185518	6.74359	107.158	0.00085757	0.272001	SV2B	15	91099950	91301309	+	12454	protein_coding	synaptic vesicle glycoprotein 2B [Source:HGNC Symbol;Acc:HGNC:16874]	-	14	0	0.0518844	0
ENSG00000226526	-6.68076	102.591	0.00085757	0.272001	AL049569.1	1	16978926	17005091	+	636	antisense	novel transcript	-	0	12	0	0.965607
ENSG00000152583	1.41554	2.66759	0.000858941	0.272001	SPARCL1	4	87473335	87531061	-	3477	protein_coding	SPARC like 1 [Source:HGNC Symbol;Acc:HGNC:11220]	-	1540	517	20.4425	7.60961
ENSG00000235351	-2.28435	4.87146	0.000877744	0.272001	AC114730.3	2	241724615	241725693	-	584	antisense	novel transcript	-	7	31	0.553226	2.7166
ENSG00000149043	-2.50231	5.6659	0.000877744	0.272001	SYT8	11	1828307	1837521	+	4704	protein_coding	synaptotagmin 8 [Source:HGNC Symbol;Acc:HGNC:19264]	-	6	31	0.058871	0.337265
ENSG00000225391	-2.28435	4.87146	0.000877744	0.272001	NHEG1	6	136982165	136993234	-	1357	lincRNA	neuroblastoma highly expressed 1 [Source:NCBI gene;Acc:100294720]	-	7	31	0.238087	1.16912
ENSG00000177453	2.49137	5.6231	0.000883969	0.272001	NIM1K	5	43192071	43280850	+	3619	protein_coding	NIM1 serine/threonine protein kinase [Source:HGNC Symbol;Acc:HGNC:28646]	-	32	5	0.408112	0.0707063
ENSG00000241754	3.86043	14.5246	0.000884859	0.272001	AC108748.1	3	102663163	102673913	-	515	lincRNA	novel transcript	-	18	1	1.61318	0.0993732
ENSG00000245498	-1.94315	3.84543	0.000977512	0.296818	AP000866.1	11	124800450	124834487	+	4854	antisense	uncharacterized LOC100507283 [Source:NCBI gene;Acc:100507283]	-	15	52	0.142629	0.548252
ENSG00000256673	-2.10789	4.3106	0.00101927	0.301049	AC141557.1	12	9398355	9414851	-	400	unprocessed_pseudogene	ovostatin (OVOS) pseudogene	-	10	39	1.15387	4.98978
ENSG00000221995	-2.10789	4.3106	0.00101927	0.301049	TIAF1	17	29073521	29078857	-	5337	protein_coding	TGFB1-induced anti-apoptotic factor 1 [Source:HGNC Symbol;Acc:HGNC:11803]	-	10	39	0.086481	0.373976
ENSG00000140543	-1.95625	3.88053	0.00102772	0.301049	DET1	15	88494440	88546675	-	6853	protein_coding	DET1, COP1 ubiquitin ligase partner [Source:HGNC Symbol;Acc:HGNC:25477]	-	14	49	0.0942899	0.365925
ENSG00000279636	-3.3237	10.0123	0.00108459	0.314013	LINC00216	14	58288033	58289158	+	1126	lincRNA	long intergenic non-protein coding RNA 216 [Source:NCBI gene;Acc:55451]	-	2	19	0.0819803	0.863558
ENSG00000181215	-2.18491	4.54699	0.00111107	0.317982	C4orf50	4	5897373	6200555	-	20673	protein_coding	chromosome 4 open reading frame 50 [Source:HGNC Symbol;Acc:HGNC:33766]	-	8	33	0.0178609	0.0816934
ENSG00000106733	2.79324	6.93184	0.0011736	0.328332	NMRK1	9	75060573	75088217	-	3865	protein_coding	nicotinamide riboside kinase 1 [Source:HGNC Symbol;Acc:HGNC:26057]	-	24	3	0.286602	0.0397236
ENSG00000279265	-2.97908	7.88484	0.0011736	0.328332	AC000123.2	7	127349833	127350293	-	461	TEC	TEC	-	3	22	0.300357	2.4423
ENSG00000249693	2.56098	5.90108	0.00119746	0.331283	THEGL	4	56530609	56603507	+	1793	protein_coding	theg spermatid protein like [Source:HGNC Symbol;Acc:HGNC:43771]	-	27	4	0.695026	0.114171
ENSG00000264112	-1.44792	2.72814	0.0013018	0.356193	AC015813.1	17	57989039	57994850	-	5812	lincRNA	novel transcript	-	101	247	0.802072	2.17494
ENSG00000075886	-1.97121	3.92098	0.00131742	0.356547	TUBA3D	2	131476093	131482934	+	1598	protein_coding	tubulin alpha 3d [Source:HGNC Symbol;Acc:HGNC:24071]	-	13	46	0.375478	1.47319
ENSG00000101049	-2.10218	4.29359	0.00135615	0.357247	SGK2	20	43558968	43588237	+	5184	protein_coding	SGK2, serine/threonine kinase 2 [Source:HGNC Symbol;Acc:HGNC:13900]	-	9	35	0.08013	0.345525
ENSG00000140749	-3.89844	14.9124	0.00136958	0.357247	IGSF6	16	21639537	21652660	-	3532	protein_coding	immunoglobulin superfamily member 6 [Source:HGNC Symbol;Acc:HGNC:5953]	-	1	15	0.0130676	0.217344
ENSG00000254860	-1.83941	3.57864	0.00137481	0.357247	TMEM9B-AS1	11	8964675	8977527	+	1162	antisense	TMEM9B antisense RNA 1 [Source:HGNC Symbol;Acc:HGNC:19230]	-	18	58	0.714964	2.55446
ENSG00000225872	-1.88669	3.69787	0.00140025	0.357247	LINC01529	19	35785697	35797902	-	4415	transcribed_unprocessed_pseudogene	long intergenic non-protein coding RNA 1529 [Source:HGNC Symbol;Acc:HGNC:51268]	-	15	50	0.156812	0.579583
ENSG00000183305	1.46613	2.76279	0.00140252	0.357247	MAGEA2B	X	152714586	152718607	+	2422	protein_coding	MAGE family member A2B [Source:HGNC Symbol;Acc:HGNC:19340]	-	247	80	4.70696	1.69041
ENSG00000249437	-1.63422	3.10419	0.00140609	0.357247	NAIP	5	70968483	71025114	-	9513	protein_coding	NLR family apoptosis inhibitory protein [Source:HGNC Symbol;Acc:HGNC:7634]	-	33	92	0.160108	0.494933
ENSG00000259605	-2.14068	4.4097	0.0014361	0.357801	AC074212.1	19	45764785	45769806	+	2600	processed_transcript	novel transcript, antisense to SIX5	-	8	32	0.142015	0.629873
ENSG00000135363	6.63771	99.5751	0.00143701	0.357801	LMO2	11	33858576	33892289	-	3109	protein_coding	LIM domain only 2 [Source:HGNC Symbol;Acc:HGNC:6642]	-	13	0	0.192992	0
ENSG00000128285	1.97346	3.92709	0.00149604	0.36881	MCHR1	22	40678750	40682814	+	2961	protein_coding	melanin concentrating hormone receptor 1 [Source:HGNC Symbol;Acc:HGNC:4479]	-	53	12	0.826143	0.207405
ENSG00000184613	1.72172	3.2983	0.00151501	0.369826	NELL2	12	44508275	44921848	-	6424	protein_coding	neural EGFL like 2 [Source:HGNC Symbol;Acc:HGNC:7751]	-	85	23	0.610705	0.183231
ENSG00000229109	-3.24619	9.48855	0.00159793	0.372199	AL137847.1	9	83219331	83234242	+	444	antisense	novel transcript	-	2	18	0.207905	2.07475
ENSG00000283971	3.08967	8.51303	0.00159793	0.372199	MIR4442	3	25664873	25664939	-	67	miRNA	microRNA 4442 [Source:HGNC Symbol;Acc:HGNC:41718]	-	20	2	13.7776	1.52768
ENSG00000011201	2.18209	4.5381	0.00160897	0.372199	ANOS1	X	8528874	8732186	-	7131	protein_coding	anosmin 1 [Source:HGNC Symbol;Acc:HGNC:6211]	-	41	8	0.26537	0.0574138
ENSG00000207547	-2.03217	4.09021	0.00160897	0.372199	MIR25	7	100093560	100093643	-	84	miRNA	microRNA 25 [Source:HGNC Symbol;Acc:HGNC:31609]	-	10	37	5.49463	22.5423
ENSG00000265646	-1.43693	2.70743	0.00161371	0.372199	TUFMP1	17	27082690	27084036	-	1347	processed_pseudogene	Tu translation elongation factor, mitochondrial pseudogene 1 [Source:HGNC Symbol;Acc:HGNC:12421]	-	96	233	3.28944	8.85248
ENSG00000260051	-1.81437	3.51707	0.00161442	0.372199	AL031600.1	16	1451760	1452653	+	570	antisense	novel transcript, antisense to CLCN7	-	18	57	1.45752	5.11772
ENSG00000112562	2.73218	6.6446	0.00166513	0.373515	SMOC2	6	168441151	168673445	+	4032	protein_coding	SPARC related modular calcium binding 2 [Source:HGNC Symbol;Acc:HGNC:20323]	-	23	3	0.263284	0.0380783
ENSG00000091128	-2.91233	7.52835	0.00166513	0.373515	LAMB4	7	108023548	108130356	-	7016	protein_coding	laminin subunit beta 4 [Source:HGNC Symbol;Acc:HGNC:6491]	-	3	21	0.0197356	0.153181
ENSG00000186399	-2.91233	7.52835	0.00166513	0.373515	GOLGA8R	15	30403740	30414162	-	4433	protein_coding	golgin A8 family member R [Source:HGNC Symbol;Acc:HGNC:44407]	-	3	21	0.031235	0.242437
ENSG00000256667	-1.58542	3.00095	0.001836	0.408165	KLRA1P	12	10588063	10599669	-	2457	transcribed_unprocessed_pseudogene	killer cell lectin like receptor A1, pseudogene [Source:HGNC Symbol;Acc:HGNC:6372]	-	36	97	0.676262	2.02043
ENSG00000226332	-1.6235	3.08122	0.00207322	0.449092	AL354836.1	20	62305432	62306325	-	681	antisense	novel transcript	-	26	72	1.76215	5.4108
ENSG00000196873	-1.43031	2.69505	0.002098	0.449092	CBWD3	9	68232003	68300015	+	12319	protein_coding	COBW domain containing 3 [Source:HGNC Symbol;Acc:HGNC:18519]	-	72	174	0.269758	0.722853
ENSG00000237781	-3.79971	13.926	0.00213372	0.449092	AL356356.1	1	150548562	150557724	-	665	antisense	novel transcript, antisense to ADAMTSL4	-	1	14	0.0694059	1.07741
ENSG00000167701	-1.59298	3.01671	0.00217445	0.449092	GPT	8	144502973	144507174	+	2756	protein_coding	glutamic--pyruvic transaminase [Source:HGNC Symbol;Acc:HGNC:4552]	-	31	84	0.519159	1.55983
ENSG00000261504	1.66997	3.18207	0.00220467	0.449092	LINC01686	1	182615254	182616629	+	1376	lincRNA	long intergenic non-protein coding RNA 1686 [Source:HGNC Symbol;Acc:HGNC:27643]	-	82	23	2.75051	0.855433
ENSG00000213139	-1.76295	3.39392	0.00222939	0.449092	CRYGS	3	186538441	186546702	-	2151	protein_coding	crystallin gamma S [Source:HGNC Symbol;Acc:HGNC:2417]	-	18	55	0.386233	1.30858
ENSG00000166546	1.70896	3.26925	0.00223194	0.449092	BEAN1	16	66427297	66493529	+	7379	protein_coding	brain expressed associated with NEDD4 1 [Source:HGNC Symbol;Acc:HGNC:24160]	-	66	18	0.412823	0.124839
ENSG00000280383	-2.64311	6.24675	0.00227587	0.449092	Z95331.1	22	45657019	45680130	+	23112	sense_overlapping	novel transcript, sense overlapping ATXN10	-	4	23	0.00798804	0.0509292
ENSG00000198064	-3.16428	8.96485	0.00236482	0.449092	NPIPB13	16	30222937	30254510	-	5202	protein_coding	nuclear pore complex interacting protein family, member B13 [Source:HGNC Symbol;Acc:HGNC:41989]	-	2	17	0.0177451	0.167246
ENSG00000209482	-2.84235	7.17186	0.00237037	0.449092	SNORD83A	22	39315213	39315307	-	95	snoRNA	small nucleolar RNA, C/D box 83A [Source:HGNC Symbol;Acc:HGNC:17131]	-	3	20	1.45752	10.7741
ENSG00000136099	2.66842	6.35735	0.00237037	0.449092	PCDH8	13	52842889	52848641	-	5150	protein_coding	protocadherin 8 [Source:HGNC Symbol;Acc:HGNC:8660]	-	22	3	0.197167	0.029812
ENSG00000237289	-1.4277	2.69018	0.00238955	0.449092	CKMT1B	15	43593054	43604901	+	3470	protein_coding	creatine kinase, mitochondrial 1B [Source:HGNC Symbol;Acc:HGNC:1995]	-	63	152	0.837971	2.24177
ENSG00000182472	-1.82794	3.5503	0.00241222	0.449092	CAPN12	19	38730187	38769904	-	5966	protein_coding	calpain 12 [Source:HGNC Symbol;Acc:HGNC:13249]	-	15	48	0.116045	0.411751
ENSG00000236514	6.52344	91.9924	0.00243493	0.449092	AL135791.1	10	37857740	37859110	+	826	antisense	novel transcript	-	12	0	0.670531	0
ENSG00000246982	-6.55651	94.1249	0.00243493	0.449092	Z84485.1	6	36146698	36197205	-	1463	antisense	novel transcript, antisense to BRPF3	-	0	11	0	0.384791
ENSG00000224577	6.52344	91.9924	0.00243493	0.449092	LINC01117	2	176637710	176655958	+	699	lincRNA	long intergenic non-protein coding RNA 1117 [Source:HGNC Symbol;Acc:HGNC:49260]	-	12	0	0.792359	0
ENSG00000250027	-6.55651	94.1249	0.00243493	0.449092	AC022272.1	4	163108785	163119965	+	777	antisense	novel transcript	-	0	11	0	0.724516
ENSG00000255108	-6.55651	94.1249	0.00243493	0.449092	AP006621.1	11	823634	832883	-	792	antisense	novel transcript	-	0	11	0	0.710794
ENSG00000259407	-6.55651	94.1249	0.00243493	0.449092	AC021739.2	15	85744109	85750281	-	964	antisense	novel transcript, antisense to AKAP13	-	0	11	0	0.583972
ENSG00000223576	-6.55651	94.1249	0.00243493	0.449092	AL355001.1	13	19841827	19843672	+	444	antisense	novel transcript	-	0	11	0	1.2679
ENSG00000255122	6.52344	91.9924	0.00243493	0.449092	AC068587.2	8	12580287	12581063	+	186	processed_pseudogene	40S ribosomal protein S24 (Rps24) pseudogene	-	12	0	2.97774	0
ENSG00000261448	6.52344	91.9924	0.00243493	0.449092	AC109446.3	16	17134504	17138736	+	641	antisense	uncharacterized LOC102723692 [Source:NCBI gene;Acc:102723692]	-	12	0	0.864054	0
ENSG00000228421	-6.55651	94.1249	0.00243493	0.449092	AC005013.1	7	28957667	28959345	+	588	lincRNA	novel transcript	-	0	11	0	0.957396
ENSG00000186564	2.11017	4.31743	0.00255104	0.453162	FOXD2	1	47436017	47440691	+	4675	protein_coding	forkhead box D2 [Source:HGNC Symbol;Acc:HGNC:3803]	Fork	39	8	0.385035	0.0875759
ENSG00000124614	-1.95227	3.86982	0.00255104	0.453162	RPS10	6	34417454	34426125	-	2358	protein_coding	ribosomal protein S10 [Source:HGNC Symbol;Acc:HGNC:10383]	-	10	35	0.195737	0.759628
ENSG00000213513	-1.95227	3.86982	0.00255104	0.453162	IMPDH1P5	10	77780337	77781876	-	1540	processed_pseudogene	inosine monophosphate dehydrogenase 1 pseudogene 5 [Source:HGNC Symbol;Acc:HGNC:33960]	-	10	35	0.299707	1.16312
ENSG00000145244	1.28682	2.4399	0.00257603	0.453162	CORIN	4	47593998	47838106	-	10087	protein_coding	corin, serine peptidase [Source:HGNC Symbol;Acc:HGNC:19012]	-	940	345	4.30114	1.75038
ENSG00000235245	-1.71307	3.27858	0.00259576	0.453162	AL360181.2	10	133295187	133295977	-	626	antisense	novel transcript	-	20	59	1.4746	4.82341
ENSG00000244560	-1.50517	2.83858	0.00260544	0.453162	AC004890.2	7	149285281	149297312	+	4288	transcribed_unprocessed_pseudogene	AI894139 pseudogene [Source:NCBI gene;Acc:155060]	-	42	107	0.452077	1.27704
ENSG00000260644	1.80639	3.49765	0.00263887	0.453162	HERC2P5	16	32741314	32776196	+	6078	transcribed_unprocessed_pseudogene	hect domain and RLD 2 pseudogene 5 [Source:HGNC Symbol;Acc:HGNC:4873]	-	55	14	0.417657	0.117881
ENSG00000172955	-2.1381	4.40181	0.002639	0.453162	ADH6	4	99202638	99219537	-	4401	protein_coding	alcohol dehydrogenase 6 (class V) [Source:HGNC Symbol;Acc:HGNC:255]	-	7	28	0.0734116	0.325599
ENSG00000273402	-2.1381	4.40181	0.002639	0.453162	AC004908.3	8	237045	237669	+	625	antisense	novel transcript, antisense to ZNF596	-	7	28	0.516935	2.29274
ENSG00000226342	-2.35605	5.11967	0.002639	0.453162	NMD3P1	7	63908966	63910453	-	1488	processed_pseudogene	NMD3 ribosome export adaptor pseudogene 1 [Source:HGNC Symbol;Acc:HGNC:22672]	-	6	28	0.186108	0.963012
ENSG00000273154	-1.97336	3.92681	0.00281747	0.45824	AL121845.3	20	63708864	63739103	+	3190	protein_coding	novel protein, ZGPAT-LIME1 readthrough	-	9	32	0.130218	0.513376
ENSG00000214776	-1.97336	3.92681	0.00281747	0.45824	AC092821.1	12	9480608	9576275	+	12000	transcribed_unprocessed_pseudogene	ovostatin	-	9	32	0.0346162	0.136473
ENSG00000280623	-1.51601	2.86	0.00285595	0.45824	PCAT14	22	23536881	23547797	+	4911	lincRNA	prostate cancer associated transcript 14 [Source:HGNC Symbol;Acc:HGNC:48977]	-	37	95	0.347736	0.989988
ENSG00000280213	-1.7361	3.33134	0.00286303	0.45824	UCKL1-AS1	20	63953384	63956985	+	3602	antisense	UCKL1 antisense RNA 1 [Source:HGNC Symbol;Acc:HGNC:31967]	-	17	51	0.217833	0.724608
ENSG00000270392	-2.45012	5.46462	0.00288962	0.45824	PFN1P2	1	120432204	120434052	-	1849	transcribed_processed_pseudogene	profilin 1 pseudogene 2 [Source:HGNC Symbol;Acc:HGNC:24298]	-	5	25	0.12481	0.691958
ENSG00000267246	2.24735	4.7481	0.00288962	0.45824	AC091132.5	17	45549781	45558738	-	826	processed_transcript	novel transcript	-	27	5	1.5087	0.309789
ENSG00000234546	-1.89638	3.72278	0.00289243	0.45824	LNCTAM34A	1	9182004	9196284	+	1662	lincRNA	long non coding transcriptional activator of miR34a [Source:HGNC Symbol;Acc:HGNC:52548]	-	11	37	0.305478	1.13932
ENSG00000248126	-1.89638	3.72278	0.00289243	0.45824	AC091849.1	5	1598127	1598247	+	121	unprocessed_pseudogene	coiled-coil domain containing 127 (CCDC127) pseudogene	-	11	37	4.1959	15.6492
ENSG00000285943	-1.89638	3.72278	0.00289243	0.45824	AC112128.1	3	113361901	113515151	-	6837	protein_coding	novel protein	-	11	37	0.0742583	0.276957
ENSG00000228242	-1.79764	3.47652	0.00289507	0.45824	AC093495.1	3	14144637	14165978	+	4015	antisense	novel transcript, antisense to XPC	-	15	47	0.172434	0.599085
ENSG00000232593	-1.31846	2.494	0.00307748	0.45824	KANTR	X	53094145	53170914	+	9927	protein_coding	KDM5C adjacent transcript [Source:HGNC Symbol;Acc:HGNC:49510]	-	119	266	0.553282	1.37132
ENSG00000269293	-1.70963	3.27076	0.00308402	0.45824	ZSCAN16-AS1	6	28121795	28137293	-	2163	antisense	ZSCAN16 antisense RNA 1 [Source:HGNC Symbol;Acc:HGNC:48982]	-	18	53	0.384091	1.254
ENSG00000134996	2.27811	4.85041	0.00312822	0.45824	OSTF1	9	75088543	75147265	+	1319	protein_coding	osteoclast stimulating factor 1 [Source:HGNC Symbol;Acc:HGNC:8510]	-	33	6	1.15475	0.2328
ENSG00000226002	-2.04792	4.1351	0.00312822	0.45824	GTF2IP14	7	65084103	65100232	+	586	unprocessed_pseudogene	general transcription factor IIi pseudogene 14 [Source:HGNC Symbol;Acc:HGNC:51726]	-	8	30	0.630101	2.61999
ENSG00000259321	-2.57931	5.97654	0.00314942	0.45824	AL136295.2	14	24139445	24140444	+	747	lincRNA	novel transcript	-	4	22	0.247148	1.50723
ENSG00000135519	-1.80137	3.48551	0.00319623	0.45824	KCNH3	12	49539157	49558308	+	4340	protein_coding	potassium voltage-gated channel subfamily H member 3 [Source:HGNC Symbol;Acc:HGNC:6252]	-	14	44	0.148887	0.518847
ENSG00000070886	-1.80137	3.48551	0.00319623	0.45824	EPHA8	1	22563564	22603594	+	5358	protein_coding	EPH receptor A8 [Source:HGNC Symbol;Acc:HGNC:3391]	-	14	44	0.120599	0.420268
ENSG00000133067	2.07283	4.2071	0.00321704	0.45824	LGR6	1	202193901	202319781	+	4583	protein_coding	leucine rich repeat containing G protein-coupled receptor 6 [Source:HGNC Symbol;Acc:HGNC:19719]	-	38	8	0.382694	0.089334
ENSG00000157368	1.39654	2.63269	0.00329924	0.45824	IL34	16	70579895	70660682	+	2233	protein_coding	interleukin 34 [Source:HGNC Symbol;Acc:HGNC:28529]	-	156	53	3.22443	1.21468
ENSG00000126460	-3.69372	12.9396	0.00334606	0.45824	PRRG2	19	49580646	49591015	+	1701	protein_coding	proline rich and Gla domain 2 [Source:HGNC Symbol;Acc:HGNC:9470]	-	1	13	0.027134	0.391125
ENSG00000279602	-3.69372	12.9396	0.00334606	0.45824	AC109326.1	17	43360041	43361361	-	1321	TEC	TEC	-	1	13	0.0349394	0.503636
ENSG00000102452	3.59949	12.1215	0.00334606	0.45824	NALCN	13	101053776	101416492	-	9140	protein_coding	sodium leak channel, non-selective [Source:HGNC Symbol;Acc:HGNC:19082]	-	15	1	0.0757465	0.00559926
ENSG00000279541	-3.69372	12.9396	0.00334606	0.45824	AC005261.5	19	57293083	57294469	-	1387	TEC	TEC	-	1	13	0.0332768	0.479671
ENSG00000283667	-3.69372	12.9396	0.00334606	0.45824	AC009802.1	18	63966406	63970181	-	1609	antisense	uncharacterized LOC105372165 [Source:NCBI gene;Acc:105372165]	-	1	13	0.0286855	0.413489
ENSG00000226312	-3.69372	12.9396	0.00334606	0.45824	CFLAR-AS1	2	201140278	201157823	-	4334	antisense	CFLAR antisense RNA 1 [Source:HGNC Symbol;Acc:HGNC:14437]	-	1	13	0.0106495	0.153508
ENSG00000213212	-3.69372	12.9396	0.00334606	0.45824	NCLP1	9	136812788	136815536	-	1963	processed_pseudogene	nucleolin pseudogene 1 [Source:HGNC Symbol;Acc:HGNC:35472]	-	1	13	0.0235124	0.338922
ENSG00000222533	-3.69372	12.9396	0.00334606	0.45824	RNU6-705P	5	181301967	181302070	+	104	snRNA	RNA, U6 small nuclear 705, pseudogene [Source:HGNC Symbol;Acc:HGNC:47668]	-	1	13	0.443797	6.39715
ENSG00000168970	-1.41309	2.66308	0.00336081	0.45824	JMJD7-PLA2G4B	15	41828095	41848155	+	7862	protein_coding	JMJD7-PLA2G4B readthrough [Source:HGNC Symbol;Acc:HGNC:34449]	-	54	129	0.317014	0.839717
ENSG00000271755	2.60172	6.0701	0.00338513	0.45824	AL031118.1	6	27404010	27406964	-	2955	lincRNA	novel transcript	-	21	3	0.328004	0.0519565
ENSG00000239377	-2.76879	6.81537	0.00338513	0.45824	AC073111.1	7	150379854	150383885	-	420	antisense	novel transcript	-	3	19	0.329678	2.31516
ENSG00000269997	-2.76879	6.81537	0.00338513	0.45824	AC068790.3	12	123966077	123966629	-	553	sense_intronic	novel transcript, sense intronic to CCDC92	-	3	19	0.250388	1.75835
ENSG00000110169	-1.7076	3.26617	0.00338979	0.45824	HPX	11	6431049	6442617	-	3631	protein_coding	hemopexin [Source:HGNC Symbol;Acc:HGNC:5171]	-	17	50	0.216093	0.704726
ENSG00000230982	-1.7076	3.26617	0.00338979	0.45824	DSTNP1	21	46653558	46654022	-	465	processed_pseudogene	destrin, actin depolymerizing factor pseudogene 1 [Source:HGNC Symbol;Acc:HGNC:23769]	-	17	50	1.68738	5.50292
ENSG00000188092	-1.3038	2.46879	0.00339797	0.45824	GPR89B	1	147928393	147993521	+	5143	protein_coding	G protein-coupled receptor 89B [Source:HGNC Symbol;Acc:HGNC:13840]	-	127	281	1.13974	2.79619
ENSG00000270419	-2.30381	4.93759	0.00348955	0.45824	CAHM	6	163413065	163413960	-	896	lincRNA	colon adenocarcinoma hypermethylated [Source:HGNC Symbol;Acc:HGNC:42860]	-	6	27	0.309073	1.54217
ENSG00000262766	-2.30381	4.93759	0.00348955	0.45824	AC135050.5	16	31118078	31118747	+	543	sense_intronic	novel transcript	-	6	27	0.509999	2.54472
ENSG00000244945	-2.30381	4.93759	0.00348955	0.45824	AC136604.2	5	179595904	179603741	-	1966	antisense	uncharacterized LOC101928445 [Source:NCBI gene;Acc:101928445]	-	6	27	0.140859	0.70284
ENSG00000164972	-2.30381	4.93759	0.00348955	0.45824	C9orf24	9	34379019	34397832	-	1439	protein_coding	chromosome 9 open reading frame 24 [Source:HGNC Symbol;Acc:HGNC:19919]	-	6	27	0.192446	0.960239
ENSG00000236200	-3.07744	8.44114	0.00351516	0.45824	KDM4A-AS1	1	43699765	43708138	-	1931	antisense	KDM4A antisense RNA 1 [Source:HGNC Symbol;Acc:HGNC:40528]	-	2	16	0.0478041	0.424047
ENSG00000260095	-3.07744	8.44114	0.00351516	0.45824	AC106820.3	16	2452581	2452977	-	397	antisense	novel transcript, antisense to CCNF	-	2	16	0.232518	2.06256
ENSG00000280327	2.93872	7.6673	0.00351516	0.45824	Z97633.1	16	1576716	1578371	-	1656	TEC	tec	-	18	2	0.501684	0.0618082
ENSG00000182308	-3.07744	8.44114	0.00351516	0.45824	DCAF4L1	4	41981696	41986467	+	4772	protein_coding	DDB1 and CUL4 associated factor 4 like 1 [Source:HGNC Symbol;Acc:HGNC:27723]	-	2	16	0.019344	0.171592
ENSG00000277050	-3.07744	8.44114	0.00351516	0.45824	AL122125.1	14	51637348	51637947	-	600	antisense	novel transcript, antisense to FRMD6	-	2	16	0.15385	1.36473
ENSG00000273108	-3.07744	8.44114	0.00351516	0.45824	AL121929.2	10	103608619	103610050	+	1432	antisense	novel transcript, antisense to SH3PXD2A	-	2	16	0.0644621	0.571812
ENSG00000173404	2.93872	7.6673	0.00351516	0.45824	INSM1	20	20368121	20370949	+	2829	protein_coding	INSM transcriptional repressor 1 [Source:HGNC Symbol;Acc:HGNC:6090]	zf-C2H2	18	2	0.293668	0.0361804
ENSG00000149575	-3.07744	8.44114	0.00351516	0.45824	SCN2B	11	118161951	118176673	-	5826	protein_coding	sodium voltage-gated channel beta subunit 2 [Source:HGNC Symbol;Acc:HGNC:10589]	-	2	16	0.0158445	0.140548
ENSG00000130829	1.57331	2.97586	0.00381429	0.47922	DUSP9	X	153642492	153651326	+	2776	protein_coding	dual specificity phosphatase 9 [Source:HGNC Symbol;Acc:HGNC:3076]	-	80	24	1.33011	0.442454
ENSG00000181722	-1.38699	2.61533	0.00400462	0.47922	ZBTB20	3	114314501	115147271	-	31872	protein_coding	zinc finger and BTB domain containing 20 [Source:HGNC Symbol;Acc:HGNC:13503]	ZBTB	52	122	0.0753029	0.195897
ENSG00000130684	-1.34976	2.5487	0.00402462	0.47922	ZNF337	20	25674215	25696841	-	3823	protein_coding	zinc finger protein 337 [Source:HGNC Symbol;Acc:HGNC:15809]	zf-C2H2	63	144	0.760596	1.92768
ENSG00000115290	-1.86767	3.64943	0.00406065	0.47922	GRB14	2	164492812	164621848	-	2958	protein_coding	growth factor receptor bound protein 14 [Source:HGNC Symbol;Acc:HGNC:4565]	-	10	33	0.156034	0.570942
ENSG00000280374	-1.86767	3.64943	0.00406065	0.47922	AC019080.5	2	177317715	177318471	-	757	sense_intronic	novel transcript	-	10	33	0.609708	2.23097
ENSG00000237950	-1.99921	3.99781	0.00406587	0.47922	AL357079.1	1	43944370	43946551	-	557	antisense	novel transcript	-	8	29	0.662907	2.66452
ENSG00000203499	-6.42053	85.659	0.00417417	0.47922	IQANK1	8	143734140	143790644	+	4982	protein_coding	IQ motif and ankyrin repeat containing 1 [Source:HGNC Symbol;Acc:HGNC:49576]	-	0	10	0	0.102724
ENSG00000015520	-6.42053	85.659	0.00417417	0.47922	NPC1L1	7	44512535	44541315	-	5252	protein_coding	NPC1 like intracellular cholesterol transporter 1 [Source:HGNC Symbol;Acc:HGNC:7898]	-	0	10	0	0.0974432
ENSG00000247317	-6.42053	85.659	0.00417417	0.47922	LY6E-DT	8	142981738	143018437	-	3853	lincRNA	LY6E divergent transcript [Source:HGNC Symbol;Acc:HGNC:53728]	-	0	10	0	0.132824
ENSG00000120949	6.26354	76.827	0.00417417	0.47922	TNFRSF8	1	12063377	12144207	+	3738	protein_coding	TNF receptor superfamily member 8 [Source:HGNC Symbol;Acc:HGNC:11923]	-	10	0	0.123475	0
ENSG00000108771	6.26354	76.827	0.00417417	0.47922	DHX58	17	42101404	42112733	-	3843	protein_coding	DExH-box helicase 58 [Source:HGNC Symbol;Acc:HGNC:29517]	-	10	0	0.120101	0
ENSG00000196196	6.26354	76.827	0.00417417	0.47922	HRCT1	9	35906192	35907141	+	950	protein_coding	histidine rich carboxyl terminus 1 [Source:HGNC Symbol;Acc:HGNC:33872]	-	10	0	0.485841	0
ENSG00000270061	-6.42053	85.659	0.00417417	0.47922	AC068790.5	12	123969990	123970344	-	355	sense_intronic	novel transcript, sense intronic to CCDC92	-	0	10	0	1.44161
ENSG00000279852	-6.42053	85.659	0.00417417	0.47922	AC083964.2	8	486117	488512	-	2396	TEC	TEC	-	0	10	0	0.213594
ENSG00000139364	6.26354	76.827	0.00417417	0.47922	TMEM132B	12	125186836	125662377	+	15703	protein_coding	transmembrane protein 132B [Source:HGNC Symbol;Acc:HGNC:29397]	-	10	0	0.0293924	0
ENSG00000174171	-6.42053	85.659	0.00417417	0.47922	AC020659.1	15	41892793	41898575	+	3653	antisense	novel transcript, antisense to SPTBN5	-	0	10	0	0.140096
ENSG00000202314	-6.42053	85.659	0.00417417	0.47922	SNORD6	11	93731502	93731574	-	73	snoRNA	small nucleolar RNA, C/D box 6 [Source:HGNC Symbol;Acc:HGNC:32703]	-	0	10	0	7.01057
ENSG00000231691	-6.42053	85.659	0.00417417	0.47922	AL592114.3	1	204277005	204277948	+	446	antisense	novel transcript	-	0	10	0	1.14747
ENSG00000285641	-6.42053	85.659	0.00417417	0.47922	AL358472.6	1	153975850	153986246	-	1706	protein_coding	novel protein	-	0	10	0	0.299984
ENSG00000051180	6.26354	76.827	0.00417417	0.47922	RAD51	15	40694774	40732339	+	3046	protein_coding	RAD51 recombinase [Source:HGNC Symbol;Acc:HGNC:9817]	-	10	0	0.151526	0
ENSG00000267201	-6.42053	85.659	0.00417417	0.47922	LINC01775	19	2458935	2462185	-	371	lincRNA	long intergenic non-protein coding RNA 1775 [Source:HGNC Symbol;Acc:HGNC:52565]	-	0	10	0	1.37944
ENSG00000271889	-6.42053	85.659	0.00417417	0.47922	AC016747.2	2	61151433	61162105	-	884	lincRNA	novel transcript	-	0	10	0	0.578928
ENSG00000261279	6.26354	76.827	0.00417417	0.47922	ULK4P1	15	32406597	32434992	-	1687	transcribed_unprocessed_pseudogene	ULK4 pseudogene 1 [Source:HGNC Symbol;Acc:HGNC:15775]	-	10	0	0.273592	0
ENSG00000255537	6.26354	76.827	0.00417417	0.47922	AP000708.1	11	125495214	125499528	+	3423	bidirectional_promoter_lncRNA	novel transcript, antisense to FEZ1	-	10	0	0.134838	0
ENSG00000269883	6.26354	76.827	0.00417417	0.47922	AC007375.2	14	77140683	77142996	+	2314	antisense	novel transcript, antisense to ZDHHC22	-	10	0	0.199459	0
ENSG00000188833	-1.73507	3.32895	0.0041765	0.47922	ENTPD8	9	137434364	137441816	-	2836	protein_coding	ectonucleoside triphosphate diphosphohydrolase 8 [Source:HGNC Symbol;Acc:HGNC:24860]	-	15	45	0.24412	0.81205
ENSG00000196421	-1.46025	2.75156	0.00426936	0.487628	C20orf204	20	64034344	64039962	+	5480	protein_coding	chromosome 20 open reading frame 204 [Source:HGNC Symbol;Acc:HGNC:27655]	-	34	84	0.286362	0.784468
ENSG00000171759	-2.51256	5.70633	0.00436855	0.496678	PAH	12	102836885	102958410	-	7731	protein_coding	phenylalanine hydroxylase [Source:HGNC Symbol;Acc:HGNC:8582]	-	4	21	0.0238804	0.139014
ENSG00000160223	1.94258	3.84393	0.00449771	0.508482	ICOSLG	21	44217014	44240966	-	9341	protein_coding	inducible T cell costimulator ligand [Source:HGNC Symbol;Acc:HGNC:17087]	-	39	9	0.192703	0.0493089
ENSG00000234742	-1.49819	2.82488	0.00451322	0.508482	AC144530.1	3	197850400	197850954	-	555	processed_pseudogene	ribosomal protein L17 (RPL17) pseudogene	-	26	66	2.16221	6.08594
ENSG00000228192	-1.8806	3.68228	0.00461337	0.510167	AL512353.1	1	42834681	42846422	-	1617	antisense	novel transcript, antisense to ERMAP	-	9	30	0.256892	0.949484
ENSG00000285596	-1.8806	3.68228	0.00461337	0.510167	AC017116.2	7	44011882	44038978	-	2698	processed_transcript	novel transcript	-	9	30	0.153964	0.569057
ENSG00000164023	2.04209	4.11843	0.00462106	0.510167	SGMS2	4	107824563	107915047	+	7635	protein_coding	sphingomyelin synthase 2 [Source:HGNC Symbol;Acc:HGNC:28395]	-	28	6	0.169265	0.0402178
ENSG00000251188	-2.03165	4.08872	0.00462106	0.510167	AC079140.3	4	268982	269531	-	550	processed_pseudogene	novel zinc finger protein pseudogene	-	7	26	0.587426	2.41929
ENSG00000231587	-1.73444	3.3275	0.00468829	0.510167	SNORD62B	9	131490486	131490571	+	86	snoRNA	small nucleolar RNA, C/D box 62B [Source:HGNC Symbol;Acc:HGNC:23031]	-	14	42	7.51359	24.9935
ENSG00000104814	-2.69129	6.45889	0.00484911	0.510167	MAP4K1	19	38587641	38618882	-	3953	protein_coding	mitogen-activated protein kinase kinase kinase kinase 1 [Source:HGNC Symbol;Acc:HGNC:6863]	-	3	18	0.0350277	0.233036
ENSG00000219410	2.53178	5.78285	0.00484911	0.510167	AC125494.1	12	6663260	6672069	+	2399	bidirectional_promoter_lncRNA	novel transcript	-	20	3	0.384784	0.0639982
ENSG00000232729	-2.69129	6.45889	0.00484911	0.510167	AC211433.1	7	74688939	74729001	-	2847	processed_transcript	uncharacterized LOC101926943 [Source:NCBI gene;Acc:101926943]	-	3	18	0.0486353	0.323565
ENSG00000228107	-2.69129	6.45889	0.00484911	0.510167	AP000692.1	21	36360630	36362040	+	596	sense_overlapping	novel transcript, sense overlapping MORC3	-	3	18	0.232323	1.54562
ENSG00000258790	-2.69129	6.45889	0.00484911	0.510167	AL121594.1	14	35122549	35317474	+	3857	protein_coding	novel transcript	-	3	18	0.0358996	0.238836
ENSG00000279039	-2.69129	6.45889	0.00484911	0.510167	AC011447.6	19	20207192	20209789	-	2598	TEC	TEC	-	3	18	0.0532966	0.354576
ENSG00000135436	-1.59348	3.01776	0.00499868	0.510167	FAM186B	12	49582885	49605639	-	4756	protein_coding	family with sequence similarity 186 member B [Source:HGNC Symbol;Acc:HGNC:25296]	-	21	57	0.203796	0.613352
ENSG00000028137	1.37449	2.59275	0.00510247	0.510167	TNFRSF1B	1	12167003	12209228	+	3766	protein_coding	TNF receptor superfamily member 1B [Source:HGNC Symbol;Acc:HGNC:11917]	-	116	40	1.42166	0.543571
ENSG00000178852	-1.82344	3.53924	0.00512978	0.510167	EFCAB13	17	47323290	47441312	+	6672	protein_coding	EF-hand calcium binding domain 13 [Source:HGNC Symbol;Acc:HGNC:26864]	-	10	32	0.069177	0.245454
ENSG00000214967	-1.82344	3.53924	0.00512978	0.510167	NPIPA7	16	16379055	16393954	+	1401	protein_coding	nuclear pore complex interacting protein family member A7 [Source:HGNC Symbol;Acc:HGNC:41982]	-	10	32	0.329442	1.16893
ENSG00000280239	-1.57643	2.9823	0.00522492	0.510167	AC011498.7	19	4448810	4450836	+	2027	TEC	TEC	-	22	59	0.500941	1.48962
ENSG00000210164	-1.31034	2.48	0.00522546	0.510167	MT-TG	MT	9991	10058	+	68	Mt_tRNA	mitochondrially encoded tRNA glycine [Source:HGNC Symbol;Acc:HGNC:7486]	-	67	149	45.4761	112.138
ENSG00000169252	-2.98503	7.91744	0.00524731	0.510167	ADRB2	5	148825245	148828687	+	3443	protein_coding	adrenoceptor beta 2 [Source:HGNC Symbol;Acc:HGNC:286]	-	2	15	0.0268109	0.222962
ENSG00000140093	-2.98503	7.91744	0.00524731	0.510167	SERPINA10	14	94280455	94293271	-	5472	protein_coding	serpin family A member 10 [Source:HGNC Symbol;Acc:HGNC:15996]	-	2	15	0.0168695	0.140288
ENSG00000280486	-2.98503	7.91744	0.00524731	0.510167	AC005329.3	19	1386804	1389651	-	1366	antisense	novel transcript, antisense to NDUFS7	-	2	15	0.0675767	0.561975
ENSG00000284930	2.85687	7.24444	0.00524731	0.510167	AC005280.2	14	73458850	73466167	-	1412	lincRNA	uncharacterized LOC101928143 [Source:NCBI gene;Acc:101928143]	-	17	2	0.555689	0.0724889
ENSG00000254338	2.85687	7.24444	0.00524731	0.510167	MAFA-AS1	8	143417679	143419150	+	417	antisense	MAFA antisense RNA 1 [Source:HGNC Symbol;Acc:HGNC:51203]	-	17	2	1.88161	0.245454
ENSG00000272905	-2.98503	7.91744	0.00524731	0.510167	AC018648.1	7	32845394	32846061	+	668	lincRNA	novel transcript	-	2	15	0.138188	1.14919
ENSG00000225746	-2.98503	7.91744	0.00524731	0.510167	MEG8	14	100894770	101038859	+	11109	lincRNA	maternally expressed 8, small nucleolar RNA host gene [Source:HGNC Symbol;Acc:HGNC:14574]	-	2	15	0.00830946	0.0691023
ENSG00000225255	-3.57933	11.9532	0.00528154	0.510167	LINC01297	22	15746630	15778297	+	855	lincRNA	long intergenic non-protein coding RNA 1297 [Source:NCBI gene;Acc:106146148]	-	1	12	0.0539823	0.718276
ENSG00000235978	-3.57933	11.9532	0.00528154	0.510167	AC018816.1	3	4814294	4887293	-	1251	antisense	novel transcript, antisense to ITPR1	-	1	12	0.0368944	0.490908
ENSG00000249216	-3.57933	11.9532	0.00528154	0.510167	AC105389.2	4	41688858	41692797	-	435	antisense	novel transcript	-	1	12	0.106103	1.41178
ENSG00000258646	-3.57933	11.9532	0.00528154	0.510167	AL049780.1	14	75004719	75008481	-	489	antisense	novel transcript, antisense to EIF2B2	-	1	12	0.0943863	1.25588
ENSG00000279187	-3.57933	11.9532	0.00528154	0.510167	AC027601.5	17	81262920	81265401	+	2482	TEC	TEC	-	1	12	0.0185958	0.247432
ENSG00000260473	-3.57933	11.9532	0.00528154	0.510167	AC068987.3	12	51815043	51842106	+	2154	lincRNA	novel transcript	-	1	12	0.0214275	0.28511
ENSG00000187944	-3.57933	11.9532	0.00528154	0.510167	C2orf66	2	196805002	196810276	-	1669	protein_coding	chromosome 2 open reading frame 66 [Source:HGNC Symbol;Acc:HGNC:33809]	-	1	12	0.0276542	0.367961
ENSG00000233436	-3.57933	11.9532	0.00528154	0.510167	BTBD18	11	57743514	57751781	-	3188	protein_coding	BTB domain containing 18 [Source:HGNC Symbol;Acc:HGNC:37214]	-	1	12	0.0144777	0.192637
ENSG00000248583	-3.57933	11.9532	0.00528154	0.510167	AC119751.3	4	49486926	49489554	-	670	unprocessed_pseudogene	ankyrin repeat domain family (ANKRD) pseudogene	-	1	12	0.0688879	0.916606
ENSG00000164047	3.50085	11.3204	0.00528154	0.510167	CAMP	3	48223347	48225491	+	745	protein_coding	cathelicidin antimicrobial peptide [Source:HGNC Symbol;Acc:HGNC:1472]	-	14	1	0.86734	0.0686942
ENSG00000270711	-3.57933	11.9532	0.00528154	0.510167	AL162431.4	1	180970837	180971247	+	411	processed_pseudogene	cell division cycle associated 8 (CDCA8) pseudogene	-	1	12	0.112299	1.49422
ENSG00000225022	2.13688	4.3981	0.00528628	0.510167	UBE2D3P1	20	5292388	5292831	-	444	processed_pseudogene	ubiquitin conjugating enzyme E2 D3 pseudogene 1 [Source:HGNC Symbol;Acc:HGNC:33349]	-	25	5	2.59881	0.57632
ENSG00000213131	-2.33042	5.02951	0.00528628	0.510167	YWHAZP4	6	127355756	127356789	+	708	processed_pseudogene	tyrosine 3-monooxygenase/tryptophan 5-monooxygenase activation protein zeta pseudogene 4 [Source:HGNC Symbol;Acc:HGNC:30851]	-	5	23	0.325953	1.66254
ENSG00000269226	-1.58558	3.00129	0.00554986	0.533536	TMSB15B	X	104063871	104076212	-	3061	protein_coding	thymosin beta 15B [Source:NCBI gene;Acc:286527]	-	20	54	0.301567	0.902832
ENSG00000272812	-1.77479	3.42189	0.00561466	0.53563	AC004908.2	8	233119	233692	+	574	sense_intronic	novel transcript, sense intronic to ZNF596	-	11	34	0.884501	3.0314
ENSG00000250337	-1.77479	3.42189	0.00561466	0.53563	PURPL	5	27472292	27496401	+	2638	lincRNA	p53 upregulated regulator of p53 levels [Source:HGNC Symbol;Acc:HGNC:48995]	-	11	34	0.192458	0.6596
ENSG00000113209	-1.69977	3.2485	0.0056822	0.537951	PCDHB5	5	141135218	141138625	+	3408	protein_coding	protocadherin beta 5 [Source:HGNC Symbol;Acc:HGNC:8690]	-	14	41	0.189603	0.615688
ENSG00000268670	-1.69977	3.2485	0.0056822	0.537951	AC016586.1	19	4061615	4062749	-	684	sense_intronic	novel transcript, sense intronic to ZBTB7A	-	14	41	0.944691	3.06764
ENSG00000162728	1.61525	3.06365	0.00592786	0.548936	KCNJ9	1	160081570	160090563	+	4170	protein_coding	potassium voltage-gated channel subfamily J member 9 [Source:HGNC Symbol;Acc:HGNC:6270]	-	55	16	0.608758	0.196363
ENSG00000237988	1.23242	2.34961	0.00594612	0.548936	OR2I1P	6	29550407	29557721	+	5365	protein_coding	olfactory receptor family 2 subfamily I member 1 pseudogene [Source:HGNC Symbol;Acc:HGNC:8258]	-	273	104	2.34861	0.992065
ENSG00000129993	-1.26163	2.39766	0.00595598	0.548936	CBFA2T3	16	88874858	88977204	-	5972	protein_coding	CBFA2/RUNX1 translocation partner 3 [Source:HGNC Symbol;Acc:HGNC:1537]	-	87	187	0.672384	1.6025
ENSG00000163794	-1.44401	2.72076	0.00605602	0.548936	UCN	2	27307400	27308445	-	795	protein_coding	urocortin [Source:HGNC Symbol;Acc:HGNC:12516]	-	27	66	1.56752	4.24867
ENSG00000111199	-1.73287	3.32389	0.00606867	0.548936	TRPV4	12	109783085	109833401	-	3759	protein_coding	transient receptor potential cation channel subfamily V member 4 [Source:HGNC Symbol;Acc:HGNC:18083]	-	12	36	0.147342	0.490125
ENSG00000152931	-2.44258	5.43612	0.00607288	0.548936	PART1	5	60487713	60547657	+	9752	lincRNA	prostate androgen-regulated transcript 1 [Source:HGNC Symbol;Acc:HGNC:17263]	-	4	20	0.0189315	0.104957
ENSG00000271662	-2.44258	5.43612	0.00607288	0.548936	AC233280.2	3	195650146	195651472	-	1070	processed_pseudogene	protein phosphatase 4, regulatory subunit 2, pseudogene.	-	4	20	0.172542	0.956583
ENSG00000280069	-2.44258	5.43612	0.00607288	0.548936	AC127024.8	17	30738182	30740275	+	2094	TEC	TEC	-	4	20	0.088166	0.488798
ENSG00000279355	-2.44258	5.43612	0.00607288	0.548936	AGPAT4-IT1	6	161160105	161161982	-	1878	TEC	AGPAT4 intronic transcript 1 [Source:HGNC Symbol;Acc:HGNC:20988]	-	4	20	0.0983065	0.545018
ENSG00000099834	-1.97533	3.93217	0.00612771	0.548936	CDHR5	11	616565	626078	-	3873	protein_coding	cadherin related family member 5 [Source:HGNC Symbol;Acc:HGNC:7521]	-	7	25	0.0834196	0.330346
ENSG00000236778	-1.97533	3.93217	0.00612771	0.548936	INTS6-AS1	13	51452367	51552364	+	9866	antisense	INTS6 antisense RNA 1 [Source:HGNC Symbol;Acc:HGNC:42691]	-	7	25	0.0327472	0.129681
ENSG00000214273	-1.97533	3.93217	0.00612771	0.548936	AGGF1P1	4	190041342	190043414	+	2073	processed_pseudogene	angiogenic factor with G-patch and FHA domains 1 pseudogene 1 [Source:HGNC Symbol;Acc:HGNC:38051]	-	7	25	0.155853	0.617188
ENSG00000116147	1.49943	2.82731	0.00624646	0.548936	TNR	1	175315194	175743770	-	12960	protein_coding	tenascin R [Source:HGNC Symbol;Acc:HGNC:11953]	-	76	24	0.270661	0.0947726
ENSG00000198840	-1.13421	2.19499	0.00635876	0.548936	MT-ND3	MT	10059	10404	+	346	protein_coding	mitochondrially encoded NADH:ubiquinone oxidoreductase core subunit 3 [Source:HGNC Symbol;Acc:HGNC:7458]	-	8974	17643	1197.09	2609.59
ENSG00000187957	1.28928	2.44407	0.00636605	0.548936	DNER	2	229357629	229714558	-	3935	protein_coding	delta/notch like EGF repeat containing [Source:HGNC Symbol;Acc:HGNC:24456]	-	153	56	1.79459	0.728316
ENSG00000162004	-1.19735	2.29318	0.00637259	0.548936	CCDC78	16	722582	726954	-	4147	protein_coding	coiled-coil domain containing 78 [Source:HGNC Symbol;Acc:HGNC:14153]	-	164	337	1.82527	4.15884
ENSG00000226054	-1.52303	2.87393	0.00646921	0.548936	MEMO1P1	21	36130489	36131376	+	888	processed_pseudogene	mediator of cell motility 1 pseudogene 1 [Source:HGNC Symbol;Acc:HGNC:23274]	-	24	62	1.24743	3.57318
ENSG00000155792	1.16961	2.24951	0.00652596	0.548936	DEPTOR	8	119873717	120050913	+	2622	protein_coding	DEP domain containing MTOR interacting protein [Source:HGNC Symbol;Acc:HGNC:22953]	-	618	246	10.8786	4.80152
ENSG00000253522	-1.40786	2.65343	0.00652898	0.548936	MIR3142HG	5	160438594	160487426	+	2377	lincRNA	MIR3142 host gene [Source:HGNC Symbol;Acc:HGNC:51944]	-	34	81	0.660188	1.74394
ENSG00000263345	-1.41039	2.65808	0.00678005	0.548936	AC006435.2	17	2375061	2379306	-	1234	antisense	novel transcript, antisense to SGSM2	-	31	74	1.15948	3.06897
ENSG00000099984	-1.52677	2.88141	0.00695566	0.548936	GSTT2	22	23980058	23983915	+	1184	polymorphic_pseudogene	glutathione S-transferase theta 2 (gene/pseudogene) [Source:HGNC Symbol;Acc:HGNC:4642]	-	22	57	0.857608	2.46377
ENSG00000176092	-2.60938	6.1024	0.00696616	0.548936	CRYBG2	1	26321698	26360080	-	6895	protein_coding	crystallin beta-gamma domain containing 2 [Source:HGNC Symbol;Acc:HGNC:17295]	-	3	17	0.0200819	0.12618
ENSG00000236682	-2.60938	6.1024	0.00696616	0.548936	AC068282.1	2	127389130	127400580	+	2690	lincRNA	novel transcript	-	3	17	0.0514739	0.323425
ENSG00000213683	-2.60938	6.1024	0.00696616	0.548936	AC002056.1	22	50754675	50755434	-	760	processed_pseudogene	small nuclear ribonucleoprotein polypeptide A' (SNRPA1) pseudogene	-	3	17	0.18219	1.14475
ENSG00000284747	-2.60938	6.1024	0.00696616	0.548936	AL034417.4	1	7991134	8005312	+	4116	antisense	novel transcript, antisense to ERRFI1	-	3	17	0.0336406	0.211373
ENSG00000273145	1.8669	3.64747	0.00701327	0.548936	BX537318.1	22	46013606	46015498	+	1207	lincRNA	novel transcript	-	37	9	1.41486	0.381603
ENSG00000231993	-2.26662	4.81195	0.00716778	0.548936	EP300-AS1	22	41174591	41197456	-	457	antisense	EP300 antisense RNA 1 [Source:HGNC Symbol;Acc:HGNC:50504]	-	5	22	0.504977	2.46367
ENSG00000188596	-2.26662	4.81195	0.00716778	0.548936	CFAP54	12	96489571	96875555	+	12914	protein_coding	cilia and flagella associated protein 54 [Source:HGNC Symbol;Acc:HGNC:26456]	-	5	22	0.0178701	0.0871843
ENSG00000226179	-2.26662	4.81195	0.00716778	0.548936	LINC00685	X	320990	321851	+	428	antisense	long intergenic non-protein coding RNA 685 [Source:HGNC Symbol;Acc:HGNC:27560]	-	5	22	0.539193	2.6306
ENSG00000279278	-1.51267	2.85338	0.00718394	0.548936	AC245060.6	22	22264601	22273020	+	8420	lincRNA	novel transcript	-	23	59	0.126076	0.358605
ENSG00000115896	1.25459	2.38599	0.00723133	0.548936	PLCL1	2	197804702	198572581	+	8013	protein_coding	phospholipase C like 1 (inactive) [Source:HGNC Symbol;Acc:HGNC:9063]	-	176	66	1.01376	0.421527
ENSG00000039068	-6.2704	77.1931	0.00724341	0.548936	CDH1	16	68737225	68835548	+	6177	protein_coding	cadherin 1 [Source:HGNC Symbol;Acc:HGNC:1748]	-	0	9	0	0.0745661
ENSG00000166446	6.11362	69.2443	0.00724341	0.548936	CDYL2	16	80597906	80804329	-	8557	protein_coding	chromodomain Y like 2 [Source:HGNC Symbol;Acc:HGNC:23030]	-	9	0	0.0485444	0
ENSG00000129038	6.11362	69.2443	0.00724341	0.548936	LOXL1	15	73925989	73952137	+	3637	protein_coding	lysyl oxidase like 1 [Source:HGNC Symbol;Acc:HGNC:6665]	-	9	0	0.114213	0
ENSG00000137203	6.11362	69.2443	0.00724341	0.548936	TFAP2A	6	10393186	10419659	-	8274	protein_coding	transcription factor AP-2 alpha [Source:HGNC Symbol;Acc:HGNC:11742]	AP-2	9	0	0.0502047	0
ENSG00000233608	6.11362	69.2443	0.00724341	0.548936	TWIST2	2	238848032	238910543	+	1878	protein_coding	twist family bHLH transcription factor 2 [Source:HGNC Symbol;Acc:HGNC:20670]	bHLH	9	0	0.22119	0
ENSG00000210107	-6.2704	77.1931	0.00724341	0.548936	MT-TQ	MT	4329	4400	-	72	Mt_tRNA	mitochondrially encoded tRNA glutamine [Source:HGNC Symbol;Acc:HGNC:7495]	-	0	9	0	6.39715
ENSG00000185674	-6.2704	77.1931	0.00724341	0.548936	LYG2	2	99242246	99255282	-	1206	protein_coding	lysozyme g2 [Source:HGNC Symbol;Acc:HGNC:29615]	-	0	9	0	0.381919
ENSG00000240616	-6.2704	77.1931	0.00724341	0.548936	RPS6P25	19	12894133	12894880	+	748	processed_pseudogene	ribosomal protein S6 pseudogene 25 [Source:HGNC Symbol;Acc:HGNC:35948]	-	0	9	0	0.615768
ENSG00000184185	-6.2704	77.1931	0.00724341	0.548936	KCNJ12	17	21376197	21419872	+	5617	protein_coding	potassium voltage-gated channel subfamily J member 12 [Source:HGNC Symbol;Acc:HGNC:6258]	-	0	9	0	0.0820001
ENSG00000138741	-6.2704	77.1931	0.00724341	0.548936	TRPC3	4	121879027	121951754	-	4358	protein_coding	transient receptor potential cation channel subfamily C member 3 [Source:HGNC Symbol;Acc:HGNC:12335]	-	0	9	0	0.105689
ENSG00000255507	6.11362	69.2443	0.00724341	0.548936	UVRAG-DT	11	75803431	75815406	-	1526	antisense	UVRAG divergent transcript [Source:HGNC Symbol;Acc:HGNC:53952]	-	9	0	0.272211	0
ENSG00000274227	-6.2704	77.1931	0.00724341	0.548936	AC073575.2	12	112018804	112019430	-	627	antisense	novel transcript, antisense to ERP29	-	0	9	0	0.734601
ENSG00000276663	-6.2704	77.1931	0.00724341	0.548936	AC009090.3	16	57245832	57246396	-	565	antisense	novel transcript, antisense to ARL2BP	-	0	9	0	0.815212
ENSG00000177363	6.11362	69.2443	0.00724341	0.548936	LRRN4CL	11	62686402	62689899	-	2585	protein_coding	LRRN4 C-terminal like [Source:HGNC Symbol;Acc:HGNC:33724]	-	9	0	0.160694	0
ENSG00000218018	-6.2704	77.1931	0.00724341	0.548936	AL109955.1	20	57384160	57393062	-	1540	antisense	uncharacterized LOC100291105 [Source:NCBI gene;Acc:100291105]	-	0	9	0	0.299087
ENSG00000270585	-6.2704	77.1931	0.00724341	0.548936	AL445435.1	1	220207618	220208282	+	665	processed_pseudogene	sorting nexin 2 (SNX2) pseudogene	-	0	9	0	0.692624
ENSG00000277157	-6.2704	77.1931	0.00724341	0.548936	HIST1H4D	6	26188765	26189076	-	312	protein_coding	histone cluster 1 H4 family member d [Source:HGNC Symbol;Acc:HGNC:4782]	-	0	9	0	1.47627
ENSG00000207744	-6.2704	77.1931	0.00724341	0.548936	MIR10B	2	176150303	176150412	+	110	miRNA	microRNA 10b [Source:HGNC Symbol;Acc:HGNC:31498]	-	0	9	0	4.18722
ENSG00000275017	-6.2704	77.1931	0.00724341	0.548936	AL353748.2	9	88391362	88391832	-	471	processed_pseudogene	developmental pluripotency associated 3 (DPPA3) pseudogene	-	0	9	0	0.977908
ENSG00000202358	-6.2704	77.1931	0.00724341	0.548936	RNU6-652P	4	55885595	55885701	+	107	snRNA	RNA, U6 small nuclear 652, pseudogene [Source:HGNC Symbol;Acc:HGNC:47615]	-	0	9	0	4.30462
ENSG00000260318	-6.2704	77.1931	0.00724341	0.548936	COX6CP1	16	11903923	11904137	-	215	processed_pseudogene	cytochrome c oxidase subunit 6C pseudogene 1 [Source:HGNC Symbol;Acc:HGNC:2286]	-	0	9	0	2.1423
ENSG00000271396	-6.2704	77.1931	0.00724341	0.548936	AC091167.4	15	90284376	90285580	-	894	processed_pseudogene	MKI67 (FHA domain) interacting nucleolar phosphoprotein (MKI67IP) pseudogene	-	0	9	0	0.515207
ENSG00000261970	-6.2704	77.1931	0.00724341	0.548936	AL391840.1	6	79552794	79553160	+	367	processed_pseudogene	solute carrier family 19, member 3 (SLC19A3) pseudogene	-	0	9	0	1.25503
ENSG00000201900	-6.2704	77.1931	0.00724341	0.548936	RNY1P13	1	114727720	114727824	+	105	misc_RNA	RNA, Ro-associated Y1 pseudogene 13 [Source:HGNC Symbol;Acc:HGNC:50876]	-	0	9	0	4.38662
ENSG00000254527	-6.2704	77.1931	0.00724341	0.548936	ENPP7P12	8	12205759	12206389	-	631	processed_pseudogene	ectonucleotide pyrophosphatase/phosphodiesterase 7 pseudogene 12 [Source:HGNC Symbol;Acc:HGNC:48697]	-	0	9	0	0.729944
ENSG00000227262	-6.2704	77.1931	0.00724341	0.548936	HCG4B	6	29925983	29926973	-	991	unprocessed_pseudogene	HLA complex group 4B [Source:HGNC Symbol;Acc:HGNC:22919]	-	0	9	0	0.464778
ENSG00000227193	-6.2704	77.1931	0.00724341	0.548936	AC244453.1	1	121118126	121146826	+	494	lincRNA	novel transcript	-	0	9	0	0.932378
ENSG00000251600	6.11362	69.2443	0.00724341	0.548936	AC139713.2	4	143559457	144188367	+	12703	processed_transcript	uncharacterized LOC101927636 [Source:NCBI gene;Acc:101927636]	-	9	0	0.0327005	0
ENSG00000250769	-6.2704	77.1931	0.00724341	0.548936	AC119751.5	4	49507764	49508806	-	770	processed_pseudogene	coiled-coil domain containing 144 family (CCDC144) pseudogene	-	0	9	0	0.598175
ENSG00000215812	-6.2704	77.1931	0.00724341	0.548936	ZNF847P	1	227696892	227706699	-	1077	unprocessed_pseudogene	zinc finger protein 847, pseudogene [Source:HGNC Symbol;Acc:HGNC:34384]	-	0	9	0	0.427665
ENSG00000240720	-6.2704	77.1931	0.00724341	0.548936	LRRD1	7	92141643	92179531	-	4450	protein_coding	leucine rich repeats and death domain containing 1 [Source:HGNC Symbol;Acc:HGNC:34300]	-	0	9	0	0.103504
ENSG00000272071	-6.2704	77.1931	0.00724341	0.548936	AC122710.3	5	6779458	6779998	+	541	lincRNA	novel transcript	-	0	9	0	0.851377
ENSG00000249526	-6.2704	77.1931	0.00724341	0.548936	AC008667.1	5	139684645	139745010	+	568	lincRNA	novel transcript	-	0	9	0	0.810906
ENSG00000155511	6.11362	69.2443	0.00724341	0.548936	GRIA1	5	153489615	153813869	+	7636	protein_coding	glutamate ionotropic receptor AMPA type subunit 1 [Source:HGNC Symbol;Acc:HGNC:4571]	-	9	0	0.0543994	0
ENSG00000267260	-1.40542	2.64894	0.0072533	0.548936	AC020928.1	19	36773153	36777078	+	2050	lincRNA	uncharacterized LOC728485 [Source:NCBI gene;Acc:728485]	-	29	69	0.652923	1.72255
ENSG00000168026	-1.25691	2.38983	0.00736128	0.554596	TTC21A	3	39107704	39138903	+	7677	protein_coding	tetratricopeptide repeat domain 21A [Source:HGNC Symbol;Acc:HGNC:30761]	-	70	150	0.420847	0.999945
ENSG00000218510	-1.35769	2.56274	0.00737263	0.554596	LINC00339	1	22024558	22031223	+	3764	processed_transcript	long intergenic non-protein coding RNA 339 [Source:HGNC Symbol;Acc:HGNC:25011]	-	40	92	0.490488	1.25088
ENSG00000141527	-1.69236	3.23186	0.00749892	0.562396	CARD14	17	80169992	80209331	+	8366	protein_coding	caspase recruitment domain family member 14 [Source:HGNC Symbol;Acc:HGNC:16446]	-	12	35	0.0662035	0.214105
ENSG00000267121	-1.83189	3.56002	0.00758204	0.566923	AC008105.3	17	45190931	45222222	-	3719	antisense	novel transcript, antisense to FMNL1	-	9	29	0.111695	0.399069
ENSG00000238103	-1.18734	2.27733	0.00770556	0.574433	RPL9P7	X	23836742	23837321	-	580	processed_pseudogene	ribosomal protein L9 pseudogene 7 [Source:HGNC Symbol;Acc:HGNC:30335]	-	122	249	9.70844	21.9709
ENSG00000232630	-1.42202	2.67961	0.00780939	0.577655	PRPS1P2	9	125150653	125151589	+	937	processed_pseudogene	phosphoribosyl pyrophosphate synthetase 1 pseudogene 2 [Source:HGNC Symbol;Acc:HGNC:9464]	-	27	65	1.32997	3.55018
ENSG00000164049	-2.8863	7.39373	0.00786477	0.577655	FBXW12	3	48372219	48401259	+	3488	protein_coding	F-box and WD repeat domain containing 12 [Source:HGNC Symbol;Acc:HGNC:20729]	-	2	14	0.026465	0.205413
ENSG00000279653	-2.8863	7.39373	0.00786477	0.577655	AC004678.2	19	2002580	2003581	-	1002	TEC	TEC	-	2	14	0.0921255	0.715051
ENSG00000154928	2.77011	6.82158	0.00786477	0.577655	EPHB1	3	134597801	135260467	+	6956	protein_coding	EPH receptor B1 [Source:HGNC Symbol;Acc:HGNC:3392]	-	16	2	0.106164	0.0147145
ENSG00000230637	-2.8863	7.39373	0.00786477	0.577655	AL022324.1	22	25327252	25339975	+	663	unprocessed_pseudogene	novel pseudogene	-	2	14	0.13923	1.08066
ENSG00000206557	-1.658	3.15579	0.00794554	0.578747	TRIM71	3	32818018	32897826	+	8685	protein_coding	tripartite motif containing 71 [Source:HGNC Symbol;Acc:HGNC:32669]	-	13	37	0.0690862	0.218026
ENSG00000139239	-1.174	2.25636	0.00797327	0.578747	RPL14P1	12	62965325	62965969	+	645	processed_pseudogene	ribosomal protein L14 pseudogene 1 [Source:HGNC Symbol;Acc:HGNC:31384]	-	136	275	9.73188	21.8197
ENSG00000177943	-1.13516	2.19643	0.00799235	0.578747	MAMDC4	9	136850943	136860799	+	5469	protein_coding	MAM domain containing 4 [Source:HGNC Symbol;Acc:HGNC:24083]	-	310	610	2.6162	5.70819
ENSG00000169627	-1.50129	2.83096	0.00802734	0.578747	BOLA2B	16	30192934	30194306	-	1365	protein_coding	bolA family member 2B [Source:HGNC Symbol;Acc:HGNC:32479]	-	22	56	0.743888	2.09958
ENSG00000083814	-1.91672	3.77563	0.00813533	0.578747	ZNF671	19	57719751	57727624	-	3532	protein_coding	zinc finger protein 671 [Source:HGNC Symbol;Acc:HGNC:26279]	zf-C2H2	7	24	0.0914735	0.34775
ENSG00000142347	1.9357	3.82563	0.00813533	0.578747	MYO1F	19	8520790	8577577	-	8549	protein_coding	myosin IF [Source:HGNC Symbol;Acc:HGNC:7600]	-	26	6	0.14037	0.035918
ENSG00000188710	-2.13467	4.39136	0.00813533	0.578747	QRFP	9	130892702	130896812	-	1658	protein_coding	pyroglutamylated RFamide peptide [Source:HGNC Symbol;Acc:HGNC:29982]	-	6	24	0.167026	0.740804
ENSG00000127364	-2.13467	4.39136	0.00813533	0.578747	TAS2R4	7	141778442	141780819	+	2378	protein_coding	taste 2 receptor member 4 [Source:HGNC Symbol;Acc:HGNC:14911]	-	6	24	0.116455	0.516507
ENSG00000256897	-1.91672	3.77563	0.00813533	0.578747	AC018410.2	11	47220218	47221751	-	610	antisense	novel transcript	-	7	24	0.529646	2.01353
ENSG00000213901	-2.13467	4.39136	0.00813533	0.578747	SLC23A3	2	219161465	219170095	-	3601	protein_coding	solute carrier family 23 member 3 [Source:HGNC Symbol;Acc:HGNC:20601]	-	6	24	0.0769035	0.341087
ENSG00000254528	-2.13467	4.39136	0.00813533	0.578747	AP000757.1	11	117833719	117838942	+	1464	antisense	novel transcript, antisense to FXYD6	-	6	24	0.189159	0.83897
ENSG00000262580	-1.38439	2.61062	0.00818219	0.580423	AC087741.1	17	80200673	80205949	-	5122	antisense	novel transcript, antisense to CARD14	-	29	68	0.261322	0.679432
ENSG00000115657	-1.24602	2.37186	0.00827861	0.585594	ABCB6	2	219209766	219219017	-	5234	protein_coding	ATP binding cassette subfamily B member 6 (Langereis blood group) [Source:HGNC Symbol;Acc:HGNC:47]	-	63	134	0.555552	1.31023
ENSG00000259488	-1.62784	3.09049	0.00835646	0.586682	AC023355.1	15	48312353	48331856	-	4710	antisense	novel transcript, antisense to DUT	-	14	39	0.137191	0.42376
ENSG00000013297	3.39497	10.5193	0.00839028	0.586682	CLDN11	3	170418865	170454733	+	3732	protein_coding	claudin 11 [Source:HGNC Symbol;Acc:HGNC:8514]	-	13	1	0.160775	0.0137131
ENSG00000212125	3.39497	10.5193	0.00839028	0.586682	TAS2R15P	12	10964425	10965352	-	928	unprocessed_pseudogene	taste 2 receptor member 15 pseudogene [Source:HGNC Symbol;Acc:HGNC:19106]	-	13	1	0.646566	0.0551478
ENSG00000237082	3.39497	10.5193	0.00839028	0.586682	COX5BP6	13	100623875	100624429	-	211	processed_pseudogene	cytochrome c oxidase subunit 5B pseudogene 6 [Source:HGNC Symbol;Acc:HGNC:2275]	-	13	1	2.84367	0.242546
ENSG00000212493	-2.36902	5.16591	0.00845893	0.586682	SNORD19	3	52689248	52689315	+	68	snoRNA	small nucleolar RNA, C/D box 19 [Source:HGNC Symbol;Acc:HGNC:32717]	-	4	19	2.71499	14.2995
ENSG00000255710	-2.36902	5.16591	0.00845893	0.586682	AP003170.1	11	113820856	113821885	-	1030	processed_pseudogene	interferon stimulated exonuclease gene 20kDa-like 2 (ISG20L2) pseudogene	-	4	19	0.179242	0.944045
ENSG00000091704	-2.36902	5.16591	0.00845893	0.586682	CPA1	7	130380339	130388114	+	2921	protein_coding	carboxypeptidase A1 [Source:HGNC Symbol;Acc:HGNC:2296]	-	4	19	0.0632042	0.332888
ENSG00000254461	-1.40816	2.65398	0.00867488	0.599988	AP001107.4	11	66259567	66261834	-	539	antisense	novel transcript	-	26	62	2.2264	5.8868
ENSG00000100276	1.62363	3.0815	0.0087349	0.600685	RASL10A	22	29312933	29319679	-	2240	protein_coding	RAS like family 10 member A [Source:HGNC Symbol;Acc:HGNC:16954]	-	45	13	0.927219	0.29701
ENSG00000226686	-1.68764	3.2213	0.00876482	0.600685	LINC01535	19	37251912	37265535	+	2187	lincRNA	long intergenic non-protein coding RNA 1535 [Source:HGNC Symbol;Acc:HGNC:51282]	-	11	32	0.232146	0.74882
ENSG00000241370	-1.68764	3.2213	0.00876482	0.600685	RPP21	6	30345131	30346884	+	1606	protein_coding	ribonuclease P/MRP subunit p21 [Source:HGNC Symbol;Acc:HGNC:21300]	-	11	32	0.316129	1.01972
ENSG00000255423	-1.50331	2.83491	0.00878145	0.600685	EBLN2	3	73061659	73063337	+	1679	protein_coding	endogenous Bornavirus like nucleoprotein 2 [Source:HGNC Symbol;Acc:HGNC:25493]	-	20	51	0.54979	1.55452
ENSG00000167191	1.18064	2.26677	0.00882918	0.602295	GPRC5B	16	19856691	19886167	-	6667	protein_coding	G protein-coupled receptor class C group 5 member B [Source:HGNC Symbol;Acc:HGNC:13308]	-	233	92	1.61303	0.70621
ENSG00000278864	-1.19859	2.29515	0.00885687	0.602533	AC055811.4	17	17181504	17183257	+	1754	TEC	novel transcript	-	87	179	2.28932	5.22276
ENSG00000205746	-1.13652	2.1985	0.008926	0.605582	AC126755.1	16	18334400	18352476	-	6804	transcribed_unprocessed_pseudogene	polycystic kidney disease 1 (autosomal dominant) (PKD1) pseudogene	-	199	392	1.34992	2.94848
ENSG00000166923	1.09662	2.13853	0.0089788	0.607508	GREM1	15	32717974	32745107	+	14606	protein_coding	gremlin 1, DAN family BMP antagonist [Source:HGNC Symbol;Acc:HGNC:2001]	-	1841	771	5.81755	2.70147
ENSG00000275895	-1.19729	2.29308	0.00902356	0.608882	U2AF1L5	21	6484623	6499261	-	11119	protein_coding	U2 small nuclear RNA auxiliary factor 1 like 5 [Source:HGNC Symbol;Acc:HGNC:51830]	-	90	185	0.373589	0.851496
ENSG00000272836	-1.57733	2.98418	0.00908383	0.611292	AL022328.1	22	50205585	50206062	-	478	antisense	novel transcript, antisense to SELO	-	16	43	1.54493	4.60381
ENSG00000283930	-1.65069	3.13983	0.00927012	0.621302	AL117339.5	10	38094368	38360098	+	3955	protein_coding	novel transcript	-	12	34	0.14004	0.439956
ENSG00000121454	-1.21878	2.3275	0.00928247	0.621302	LHX4	1	180230286	180278982	+	6061	protein_coding	LIM homeobox 4 [Source:HGNC Symbol;Acc:HGNC:21734]	Homeobox	69	144	0.525439	1.21589
ENSG00000266714	-1.11737	2.16951	0.00936471	0.625126	MYO15B	17	75588058	75626501	+	12761	protein_coding	myosin XVB [Source:HGNC Symbol;Acc:HGNC:14083]	-	284	552	1.02719	2.21376
ENSG00000177191	1.42093	2.67759	0.00948574	0.631512	B3GNT8	19	41425359	41428730	-	1874	protein_coding	UDP-GlcNAc:betaGal beta-1,3-N-acetylglucosaminyltransferase 8 [Source:HGNC Symbol;Acc:HGNC:24139]	-	63	21	1.55163	0.57349
ENSG00000175279	-1.39303	2.6263	0.00969341	0.636048	CENPS	1	10430443	10442809	+	1739	protein_coding	centromere protein S [Source:HGNC Symbol;Acc:HGNC:23163]	-	25	59	0.663526	1.73632
ENSG00000165646	-1.53671	2.90131	0.00970392	0.636048	SLC18A2	10	117241073	117279430	+	4145	protein_coding	solute carrier family 18 member A2 [Source:HGNC Symbol;Acc:HGNC:10935]	-	18	47	0.200431	0.580296
ENSG00000263786	-1.34518	2.54061	0.0097115	0.636048	AC022211.1	17	75145261	75146546	-	717	sense_intronic	novel transcript, sense intronic to HN1	-	32	73	2.05991	5.21051
ENSG00000189423	-1.6186	3.07077	0.00972615	0.636048	USP32P3	17	20415547	20431008	+	2935	transcribed_unprocessed_pseudogene	ubiquitin specific peptidase 32 pseudogene 3 [Source:HGNC Symbol;Acc:HGNC:43576]	-	13	36	0.204434	0.627727
ENSG00000143196	-1.78147	3.43776	0.00973082	0.636048	DPT	1	168695459	168729264	-	1786	protein_coding	dermatopontin [Source:HGNC Symbol;Acc:HGNC:3011]	-	9	28	0.232583	0.80233
ENSG00000169715	-2.19987	4.59439	0.00973269	0.636048	MT1E	16	56625475	56627112	+	1052	protein_coding	metallothionein 1E [Source:HGNC Symbol;Acc:HGNC:7397]	-	5	21	0.219367	1.0216
ENSG00000250073	-2.19987	4.59439	0.00973269	0.636048	AP000866.2	11	124759129	124765936	+	1538	antisense	uncharacterized LOC101929340 [Source:NCBI gene;Acc:101929340]	-	5	21	0.150048	0.698778
ENSG00000232450	1.502	2.83235	0.00997985	0.639746	AL133517.1	1	113698884	113699631	-	748	transcribed_processed_pseudogene	ribosomal protein S2 (RPS2) pseudogene	-	54	17	3.33204	1.16312
ENSG00000276603	-2.52254	5.74591	0.0100337	0.639746	AL109614.1	20	37526642	37527060	-	419	sense_intronic	novel transcript, sense intronic to BLCAP	-	3	16	0.330465	1.95426
ENSG00000279255	-2.52254	5.74591	0.0100337	0.639746	Z97653.2	16	707650	709067	+	1418	TEC	TEC	-	3	16	0.0976479	0.577458
ENSG00000135824	-2.52254	5.74591	0.0100337	0.639746	RGS8	1	182641816	182684576	-	6685	protein_coding	regulator of G protein signaling 8 [Source:HGNC Symbol;Acc:HGNC:16810]	-	3	16	0.0207127	0.122488
ENSG00000236255	-1.24913	2.37698	0.0101015	0.639746	AC009404.1	2	117833937	117841658	+	4058	lincRNA	novel transcript	-	53	113	0.602812	1.42509
ENSG00000122824	1.32649	2.50792	0.0101305	0.639746	NUDT10	X	51332231	51337525	+	2054	protein_coding	nudix hydrolase 10 [Source:HGNC Symbol;Acc:HGNC:17621]	-	87	31	1.95495	0.772392
ENSG00000072952	-1.1459	2.21284	0.0102319	0.639746	MRVI1	11	10573091	10693988	-	7700	protein_coding	murine retrovirus integration site 1 homolog [Source:HGNC Symbol;Acc:HGNC:7237]	-	119	236	0.713303	1.56855
ENSG00000228253	-1.07061	2.10032	0.0105466	0.639746	MT-ATP8	MT	8366	8572	+	207	protein_coding	mitochondrially encoded ATP synthase membrane subunit 8 [Source:HGNC Symbol;Acc:HGNC:7415]	-	986	1855	219.849	458.617
ENSG00000186838	1.87941	3.67923	0.0108117	0.639746	SELENOV	19	39515113	39520686	+	1731	protein_coding	selenoprotein V [Source:HGNC Symbol;Acc:HGNC:30399]	-	25	6	0.666593	0.177391
ENSG00000266969	-2.07358	4.20929	0.0108117	0.639746	AP002449.1	18	12984694	12991173	-	474	antisense	novel transcript, antisense SEH1L	-	6	23	0.584239	2.48328
ENSG00000278991	-2.07358	4.20929	0.0108117	0.639746	AC090181.3	15	77063397	77064910	-	1514	TEC	TEC	-	6	23	0.182912	0.777461
ENSG00000126759	-1.85562	3.61908	0.0108117	0.639746	CFP	X	47623172	47630305	-	5617	protein_coding	complement factor properdin [Source:HGNC Symbol;Acc:HGNC:8864]	-	7	23	0.057519	0.209556
ENSG00000283235	-1.85562	3.61908	0.0108117	0.639746	AC139493.2	5	176173345	176199295	-	2436	processed_transcript	novel transcript	-	7	23	0.132629	0.4832
ENSG00000266934	-1.85562	3.61908	0.0108117	0.639746	AC005746.1	17	61382785	61384680	+	1329	sense_intronic	novel transcript, sense intronic to BCAS3	-	7	23	0.243103	0.885685
ENSG00000224629	-2.07358	4.20929	0.0108117	0.639746	AC004975.1	7	157263022	157263229	-	208	processed_pseudogene	ribosomal protein L36 (RPL36A) pseudogene	-	6	23	1.33139	5.65902
ENSG00000274642	-1.85562	3.61908	0.0108117	0.639746	AC244669.2	1	120197085	120319680	+	853	unprocessed_pseudogene	phosphodiesterase 4D interacting protein (PDE4DIP) pseudogene	-	7	23	0.378762	1.37992
ENSG00000277311	-1.85562	3.61908	0.0108117	0.639746	RF02247	2	44934055	44934271	+	217	misc_RNA		-	7	23	1.48887	5.42431
ENSG00000141665	-1.54348	2.91497	0.0108508	0.639746	FBXO15	18	74073353	74147865	-	6245	protein_coding	F-box protein 15 [Source:HGNC Symbol;Acc:HGNC:13617]	-	16	42	0.118251	0.344186
ENSG00000225200	-1.64201	3.121	0.0109584	0.639746	AC246787.1	14	105978520	105979146	-	627	processed_pseudogene	ribosomal protein S8 (RPS8) pseudogene	-	11	31	0.809735	2.53029
ENSG00000251520	-1.64201	3.121	0.0109584	0.639746	AL162431.3	1	180964511	180965909	+	537	unprocessed_pseudogene	pseudogene similar to part of major histocompatibility complex, class I-related MR1	-	11	31	0.945445	2.95436
ENSG00000002745	1.78702	3.45101	0.0109584	0.639746	WNT16	7	121325367	121341104	+	3261	protein_coding	Wnt family member 16 [Source:HGNC Symbol;Acc:HGNC:16267]	-	35	9	0.495376	0.141243
ENSG00000041982	1.05822	2.08236	0.0109816	0.639746	TNC	9	115019578	115118257	-	9636	protein_coding	tenascin C [Source:HGNC Symbol;Acc:HGNC:5318]	-	5645	2428	27.0386	12.8952
ENSG00000106633	1.37686	2.59703	0.011094	0.639746	GCK	7	44144271	44198170	-	4122	protein_coding	glucokinase [Source:HGNC Symbol;Acc:HGNC:4195]	-	64	22	0.716621	0.273144
ENSG00000166979	1.24458	2.3695	0.011112	0.639746	EVA1C	21	32412006	32515397	+	4353	protein_coding	eva-1 homolog C [Source:HGNC Symbol;Acc:HGNC:13239]	-	106	40	1.12392	0.470271
ENSG00000281376	1.51176	2.85158	0.0111591	0.639746	ABALON	20	31721507	31723409	+	1903	antisense	apoptotic BCL2L1-antisense long non-coding RNA [Source:HGNC Symbol;Acc:HGNC:49667]	-	48	15	1.16418	0.403394
ENSG00000229807	-1.05073	2.07158	0.0113721	0.639746	XIST	X	73820651	73852723	-	25264	lincRNA	X inactive specific transcript [Source:HGNC Symbol;Acc:HGNC:12810]	-	6463	11992	11.8073	24.2922
ENSG00000077092	1.10928	2.15738	0.0113987	0.639746	RARB	3	25174332	25597932	+	3697	protein_coding	retinoic acid receptor beta [Source:HGNC Symbol;Acc:HGNC:9865]	THR-like	347	144	4.33209	1.99338
ENSG00000224543	-1.50576	2.83974	0.0114402	0.639746	SNRPGP15	19	14489388	14489609	+	222	processed_pseudogene	small nuclear ribonucleoprotein polypeptide G pseudogene 15 [Source:HGNC Symbol;Acc:HGNC:49371]	-	18	46	3.74229	10.6043
ENSG00000279520	-1.50576	2.83974	0.0114402	0.639746	AC093525.8	16	2516658	2517999	+	1342	TEC	tec	-	18	46	0.619067	1.75421
ENSG00000132821	1.07956	2.11339	0.0114597	0.639746	VSTM2L	20	37903104	37945350	+	1959	protein_coding	V-set and transmembrane domain containing 2 like [Source:HGNC Symbol;Acc:HGNC:16096]	-	767	325	18.0709	8.49035
ENSG00000106336	-1.60777	3.0478	0.0114634	0.639746	FBXO24	7	100583982	100601117	+	3353	protein_coding	F-box protein 24 [Source:HGNC Symbol;Acc:HGNC:13595]	-	12	33	0.165183	0.503682
ENSG00000256061	-1.60777	3.0478	0.0114634	0.639746	DNAAF4	15	55410525	55508234	-	2934	protein_coding	dynein axonemal assembly factor 4 [Source:HGNC Symbol;Acc:HGNC:21493]	-	12	33	0.188773	0.575613
ENSG00000149927	-1.22716	2.34106	0.0115275	0.639746	DOC2A	16	30005509	30023270	-	6426	protein_coding	double C2 domain alpha [Source:HGNC Symbol;Acc:HGNC:2985]	-	50	105	0.359126	0.836229
ENSG00000235138	-1.78602	3.44862	0.0117239	0.639746	AL445931.1	9	134054290	134058805	+	2112	antisense	uncharacterized LOC100130548 [Source:NCBI gene;Acc:100130548]	-	8	25	0.174829	0.605791
ENSG00000279452	-1.78602	3.44862	0.0117239	0.639746	AC006277.1	19	2949035	2950644	+	1610	TEC	TEC	-	8	25	0.229341	0.794677
ENSG00000273521	-1.78602	3.44862	0.0117239	0.639746	AL162274.1	10	131980240	131981337	+	1098	antisense	novel transcript, antisense to BNIP3	-	8	25	0.336283	1.16524
ENSG00000270589	-1.78602	3.44862	0.0117239	0.639746	AL158163.1	10	110910596	110912244	+	1649	antisense	novel transcript, antisense to BBIP1	-	8	25	0.223917	0.775882
ENSG00000100253	-1.78602	3.44862	0.0117239	0.639746	MIOX	22	50486784	50490648	+	1796	protein_coding	myo-inositol oxygenase [Source:HGNC Symbol;Acc:HGNC:14522]	-	8	25	0.20559	0.712377
ENSG00000160712	1.38282	2.60778	0.0117497	0.639746	IL6R	1	154405193	154469450	+	6453	protein_coding	interleukin 6 receptor [Source:HGNC Symbol;Acc:HGNC:6019]	-	73	25	0.52213	0.198269
ENSG00000231784	-2.29152	4.8957	0.011803	0.639746	DBIL5P	17	752660	755336	+	2677	transcribed_unitary_pseudogene	diazepam binding inhibitor-like 5, pseudogene [Source:HGNC Symbol;Acc:HGNC:38519]	-	4	18	0.0689651	0.344113
ENSG00000260618	-2.29152	4.8957	0.011803	0.639746	AC025917.1	15	52577842	52598709	+	1211	antisense	novel transcript, antisense to KIAA1370	-	4	18	0.152452	0.760685
ENSG00000184574	-2.29152	4.8957	0.011803	0.639746	LPAR5	12	6618835	6636447	-	3258	protein_coding	lysophosphatidic acid receptor 5 [Source:HGNC Symbol;Acc:HGNC:13307]	-	4	18	0.0566665	0.282747
ENSG00000251396	-2.29152	4.8957	0.011803	0.639746	LINC01301	8	60384588	60516795	-	4428	lincRNA	long intergenic non-protein coding RNA 1301 [Source:HGNC Symbol;Acc:HGNC:50464]	-	4	18	0.0416937	0.208037
ENSG00000234084	-2.29152	4.8957	0.011803	0.639746	AL049552.1	6	135301568	135307158	+	577	antisense	novel transcript	-	4	18	0.319965	1.59652
ENSG00000267127	-2.29152	4.8957	0.011803	0.639746	AC090360.1	18	80034346	80097088	+	3902	protein_coding	novel transcript	-	4	18	0.0473141	0.236081
ENSG00000262686	-2.29152	4.8957	0.011803	0.639746	GLIS2-AS1	16	4324667	4328340	-	340	lincRNA	GLIS2 antisense RNA 1 [Source:HGNC Symbol;Acc:HGNC:51381]	-	4	18	0.542999	2.70938
ENSG00000272913	-2.78032	6.87003	0.0118324	0.639746	AC009237.14	2	95525109	95526702	-	1594	lincRNA	novel transcript	-	2	13	0.0579108	0.41738
ENSG00000137699	-2.78032	6.87003	0.0118324	0.639746	TRIM29	11	120111275	120185529	-	10218	protein_coding	tripartite motif containing 29 [Source:HGNC Symbol;Acc:HGNC:17274]	-	2	13	0.00903404	0.0651109
ENSG00000232453	-2.78032	6.87003	0.0118324	0.639746	AC105277.1	1	58882868	58903747	-	1746	lincRNA	uncharacterized LOC105378753 [Source:NCBI gene;Acc:105378753]	-	2	13	0.0528693	0.381044
ENSG00000270276	-2.78032	6.87003	0.0118324	0.639746	HIST2H4B	1	149854045	149861210	-	1929	protein_coding	histone cluster 2 H4 family member b [Source:HGNC Symbol;Acc:HGNC:29607]	-	2	13	0.0478537	0.344896
ENSG00000198590	-2.78032	6.87003	0.0118324	0.639746	C3orf35	3	37386269	37435497	+	3072	processed_transcript	chromosome 3 open reading frame 35 [Source:HGNC Symbol;Acc:HGNC:24082]	-	2	13	0.0300488	0.21657
ENSG00000244701	-2.78032	6.87003	0.0118324	0.639746	AC004918.1	7	141652381	141656810	-	770	antisense	novel transcript, antisense to AGK	-	2	13	0.119883	0.864031
ENSG00000261094	-1.44573	2.724	0.0119321	0.639746	AC007066.2	9	122937623	122940333	+	2674	sense_overlapping	novel transcript, overlapping RABGAP1	-	20	49	0.345212	0.937802
ENSG00000099251	-1.30962	2.47877	0.0120211	0.639746	HSD17B7P2	10	38356380	38378505	+	1506	transcribed_unprocessed_pseudogene	hydroxysteroid 17-beta dehydrogenase 7 pseudogene 2 [Source:HGNC Symbol;Acc:HGNC:28120]	-	31	69	0.950068	2.34477
ENSG00000280551	-1.17665	2.26051	0.0121121	0.639746	AC096745.2	4	119042024	119043937	+	1914	TEC	TEC	-	75	152	1.80858	4.06423
ENSG00000242071	-1.09925	2.14243	0.0124347	0.639746	RPL7AP6	14	69885340	69886140	-	801	processed_pseudogene	ribosomal protein L7a pseudogene 6 [Source:HGNC Symbol;Acc:HGNC:19785]	-	162	311	9.3347	19.8703
ENSG00000270871	-1.4116	2.66031	0.0125289	0.639746	AC015849.3	17	35816717	35830293	-	488	antisense	novel transcript, antisense TAF15	-	23	55	2.17533	5.76792
ENSG00000274292	-1.5292	2.88625	0.0126523	0.639746	AC084018.2	12	121800797	121803403	+	2607	lincRNA	novel transcript	-	15	39	0.265563	0.765597
ENSG00000237094	-1.34338	2.53746	0.0126975	0.639746	AL732372.2	1	365389	522928	-	6204	transcribed_unprocessed_pseudogene	pseudogene similar to part of septin 14 SEPT14	-	25	57	0.185988	0.470197
ENSG00000106927	-6.10281	68.7272	0.0127308	0.639746	AMBP	9	114060127	114078472	-	2041	protein_coding	alpha-1-microglobulin/bikunin precursor [Source:HGNC Symbol;Acc:HGNC:453]	-	0	8	0	0.200597
ENSG00000109854	5.9463	61.6616	0.0127308	0.639746	HTATIP2	11	20363685	20383783	+	2797	protein_coding	HIV-1 Tat interactive protein 2 [Source:HGNC Symbol;Acc:HGNC:16637]	-	8	0	0.132013	0
ENSG00000283674	-6.10281	68.7272	0.0127308	0.639746	AC068587.4	8	12467693	12665588	-	13920	processed_transcript	uncharacterized LOC729732 [Source:NCBI gene;Acc:729732]	-	0	8	0	0.0294122
ENSG00000278967	-6.10281	68.7272	0.0127308	0.639746	AL138847.2	1	62607766	62609584	+	1819	TEC	novel transcript	-	0	8	0	0.225078
ENSG00000122986	-6.10281	68.7272	0.0127308	0.639746	HVCN1	12	110627841	110704950	-	3688	protein_coding	hydrogen voltage gated channel 1 [Source:HGNC Symbol;Acc:HGNC:28240]	-	0	8	0	0.111013
ENSG00000237499	5.9463	61.6616	0.0127308	0.639746	AL357060.1	6	137823673	137868233	-	4088	antisense	uncharacterized LOC100130476 [Source:NCBI gene;Acc:100130476]	-	8	0	0.0903227	0
ENSG00000231381	-6.10281	68.7272	0.0127308	0.639746	RNF2P1	9	6668999	6670008	-	1010	processed_pseudogene	ring finger protein 2 pseudogene 1 [Source:HGNC Symbol;Acc:HGNC:33987]	-	0	8	0	0.405364
ENSG00000223198	5.9463	61.6616	0.0127308	0.639746	RNU2-22P	2	231501990	231502201	-	212	snRNA	RNA, U2 small nuclear 22, pseudogene [Source:HGNC Symbol;Acc:HGNC:48515]	-	8	0	1.74169	0
ENSG00000285871	5.9463	61.6616	0.0127308	0.639746	AL359844.1	10	68896920	68900768	+	1780	lincRNA	novel transcript	-	8	0	0.207438	0
ENSG00000283886	5.9463	61.6616	0.0127308	0.639746	BX664615.2	9	39816600	39874206	-	1739	processed_transcript	novel transcript	-	8	0	0.212328	0
ENSG00000251988	-6.10281	68.7272	0.0127308	0.639746	RNU4ATAC18P	6	159720415	159720540	-	126	snRNA	RNA, U4atac small nuclear 18, pseudogene [Source:HGNC Symbol;Acc:HGNC:46904]	-	0	8	0	3.24935
ENSG00000232196	-6.10281	68.7272	0.0127308	0.639746	MTRNR2L4	16	3370979	3372740	-	1762	protein_coding	MT-RNR2 like 4 [Source:HGNC Symbol;Acc:HGNC:37161]	-	0	8	0	0.23236
ENSG00000267009	-6.10281	68.7272	0.0127308	0.639746	AC007780.1	17	68413623	68524949	+	1863	processed_transcript	novel transcript	-	0	8	0	0.219763
ENSG00000241120	-6.10281	68.7272	0.0127308	0.639746	HMGN1P8	3	167694355	167694642	-	288	processed_pseudogene	high mobility group nucleosome binding domain 1 pseudogene 8 [Source:HGNC Symbol;Acc:HGNC:39351]	-	0	8	0	1.42159
ENSG00000214353	-6.10281	68.7272	0.0127308	0.639746	VAC14-AS1	16	70755098	70773251	+	4853	antisense	VAC14 antisense RNA 1 [Source:HGNC Symbol;Acc:HGNC:48605]	-	0	8	0	0.0843638
ENSG00000215156	-6.10281	68.7272	0.0127308	0.639746	AC138409.1	5	34190056	34193653	+	3598	processed_pseudogene	integral membrane glycoprotein-like [Source:NCBI gene;Acc:646652]	-	0	8	0	0.11379
ENSG00000269646	-6.10281	68.7272	0.0127308	0.639746	AC010487.2	19	52923382	52924075	+	486	lincRNA	novel transcript	-	0	8	0	0.842423
ENSG00000231304	5.9463	61.6616	0.0127308	0.639746	SGO1-AS1	3	20174244	21145967	+	6571	processed_transcript	SGO1 antisense RNA 1 [Source:HGNC Symbol;Acc:HGNC:41081]	-	8	0	0.0561922	0
ENSG00000143552	-6.10281	68.7272	0.0127308	0.639746	NUP210L	1	153992685	154155116	-	5889	protein_coding	nucleoporin 210 like [Source:HGNC Symbol;Acc:HGNC:29915]	-	0	8	0	0.0695224
ENSG00000129048	-6.10281	68.7272	0.0127308	0.639746	ACKR4	3	132597237	132618967	+	2273	protein_coding	atypical chemokine receptor 4 [Source:HGNC Symbol;Acc:HGNC:1611]	-	0	8	0	0.180122
ENSG00000254463	-6.10281	68.7272	0.0127308	0.639746	PPIAP41	11	43466392	43466871	+	480	processed_pseudogene	peptidylprolyl isomerase A pseudogene 41 [Source:HGNC Symbol;Acc:HGNC:53665]	-	0	8	0	0.852953
ENSG00000240132	5.9463	61.6616	0.0127308	0.639746	ETF1P2	7	151501878	151503463	+	1586	processed_pseudogene	eukaryotic translation termination factor 1 pseudogene 2 [Source:HGNC Symbol;Acc:HGNC:3479]	-	8	0	0.232812	0
ENSG00000260923	-6.10281	68.7272	0.0127308	0.639746	LINC02193	16	90173217	90222678	+	3723	lincRNA	long intergenic non-protein coding RNA 2193 [Source:HGNC Symbol;Acc:HGNC:53055]	-	0	8	0	0.10997
ENSG00000270923	-6.10281	68.7272	0.0127308	0.639746	TAS2R6P	7	141787815	141788640	+	826	processed_pseudogene	taste 2 receptor member 6 pseudogene [Source:HGNC Symbol;Acc:HGNC:20616]	-	0	8	0	0.495663
ENSG00000224647	5.9463	61.6616	0.0127308	0.639746	AC026954.1	17	7330452	7335413	+	1293	unitary_pseudogene	novel protein phosphatase inhibitor 2 (IPP-2) domain pseudogene	-	8	0	0.285568	0
ENSG00000207342	-6.10281	68.7272	0.0127308	0.639746	RF00019	14	88840165	88840263	+	99	misc_RNA		-	0	8	0	4.13553
ENSG00000265496	-6.10281	68.7272	0.0127308	0.639746	AC100778.3	18	49487339	49491878	+	582	antisense	microRNA 1539	-	0	8	0	0.703467
ENSG00000164744	5.9463	61.6616	0.0127308	0.639746	SUN3	7	47987148	48029119	-	1732	protein_coding	Sad1 and UNC84 domain containing 3 [Source:HGNC Symbol;Acc:HGNC:22429]	-	8	0	0.213187	0
ENSG00000282840	5.9463	61.6616	0.0127308	0.639746	AC004554.2	X	11668401	11757718	-	1893	lincRNA	novel transcript	-	8	0	0.195055	0
ENSG00000272691	-6.10281	68.7272	0.0127308	0.639746	AC092807.2	1	85578500	85578742	-	243	lincRNA	novel transcript	-	0	8	0	1.68485
ENSG00000206778	-6.10281	68.7272	0.0127308	0.639746	RNU6-213P	16	15877163	15877266	-	104	snRNA	RNA, U6 small nuclear 213, pseudogene [Source:HGNC Symbol;Acc:HGNC:47176]	-	0	8	0	3.93671
ENSG00000173728	-6.10281	68.7272	0.0127308	0.639746	C1orf100	1	244352635	244389663	+	1151	protein_coding	chromosome 1 open reading frame 100 [Source:HGNC Symbol;Acc:HGNC:30435]	-	0	8	0	0.355706
ENSG00000270457	5.9463	61.6616	0.0127308	0.639746	AC093424.1	1	59289303	59289640	-	338	lincRNA	novel transcript	-	8	0	1.09242	0
ENSG00000237708	5.9463	61.6616	0.0127308	0.639746	AL139397.2	X	57068914	57069685	-	772	processed_pseudogene	spindlin-like protein 2 (SPIN2) pseudogne	-	8	0	0.478289	0
ENSG00000234065	-6.10281	68.7272	0.0127308	0.639746	MTND4P26	2	120213631	120214989	+	1359	processed_pseudogene	MT-ND4 pseudogene 26 [Source:HGNC Symbol;Acc:HGNC:42213]	-	0	8	0	0.301264
ENSG00000257449	-6.10281	68.7272	0.0127308	0.639746	AC034102.3	12	56029649	56041806	-	300	antisense	novel transcript , antisense to IKZF4	-	0	8	0	1.36473
ENSG00000267016	-6.10281	68.7272	0.0127308	0.639746	AC111170.1	17	77469162	77472770	-	1132	antisense	novel transcript, antisense to SEPT9	-	0	8	0	0.361676
ENSG00000207457	-6.10281	68.7272	0.0127308	0.639746	RNU6-476P	22	41679711	41679817	+	107	snRNA	RNA, U6 small nuclear 476, pseudogene [Source:HGNC Symbol;Acc:HGNC:47439]	-	0	8	0	3.82633
ENSG00000225493	-6.10281	68.7272	0.0127308	0.639746	LINC01107	2	238510690	238555054	-	1975	lincRNA	long intergenic non-protein coding RNA 1107 [Source:HGNC Symbol;Acc:HGNC:49229]	-	0	8	0	0.2073
ENSG00000254454	-6.10281	68.7272	0.0127308	0.639746	RCC2P6	11	62371146	62373168	+	1557	processed_pseudogene	regulator of chromosome condensation 2 pseudogene 6 [Source:HGNC Symbol;Acc:HGNC:42382]	-	0	8	0	0.262953
ENSG00000148826	-6.10281	68.7272	0.0127308	0.639746	NKX6-2	10	132783179	132786052	-	2675	protein_coding	NK6 homeobox 2 [Source:HGNC Symbol;Acc:HGNC:19321]	Homeobox	0	8	0	0.153053
ENSG00000277299	-6.10281	68.7272	0.0127308	0.639746	AC084876.1	12	109948389	109949029	+	641	antisense	novel transcript, antisense to GIT2	-	0	8	0	0.638717
ENSG00000124019	5.9463	61.6616	0.0127308	0.639746	FAM124B	2	224378698	224402085	-	3541	protein_coding	family with sequence similarity 124 member B [Source:HGNC Symbol;Acc:HGNC:26224]	-	8	0	0.104275	0
ENSG00000214107	5.9463	61.6616	0.0127308	0.639746	MAGEB1	X	30243730	30252038	+	1969	protein_coding	MAGE family member B1 [Source:HGNC Symbol;Acc:HGNC:6808]	-	8	0	0.187526	0
ENSG00000187758	-6.10281	68.7272	0.0127308	0.639746	ADH1A	4	99276367	99291028	-	2258	protein_coding	alcohol dehydrogenase 1A (class I), alpha polypeptide [Source:HGNC Symbol;Acc:HGNC:249]	-	0	8	0	0.181319
ENSG00000283549	-6.10281	68.7272	0.0127308	0.639746	AC007161.3	7	7640752	8004053	+	637	processed_transcript	novel transcript	-	0	8	0	0.642728
ENSG00000213483	-6.10281	68.7272	0.0127308	0.639746	NDUFAF4P2	7	93844789	93845308	+	520	processed_pseudogene	NADH:ubiquinone oxidoreductase complex assembly factor 4 pseudogene 2 [Source:HGNC Symbol;Acc:HGNC:44541]	-	0	8	0	0.787341
ENSG00000254533	-6.10281	68.7272	0.0127308	0.639746	AF186192.1	8	144698614	144699185	-	572	lincRNA	novel transcript	-	0	8	0	0.715765
ENSG00000260661	5.9463	61.6616	0.0127308	0.639746	AC116903.2	15	92148752	92331037	-	1304	antisense	novel transcript, antisense to SLCO3A1	-	8	0	0.283159	0
ENSG00000242294	-1.12214	2.1767	0.0129558	0.639746	STAG3L5P	7	100336079	100351900	+	2804	transcribed_unprocessed_pseudogene	stromal antigen 3-like 5 pseudogene [Source:HGNC Symbol;Acc:HGNC:48896]	-	102	199	1.67896	3.63205
ENSG00000279673	1.82584	3.54512	0.0131493	0.639746	AC092919.2	3	171460612	171462256	+	1645	TEC	TEC	-	32	8	0.897846	0.248886
ENSG00000272269	1.82584	3.54512	0.0131493	0.639746	AL138724.1	6	17706257	17707344	+	1088	antisense	uncharacterized LOC105374952 [Source:NCBI gene;Acc:105374952]	-	32	8	1.3575	0.376303
ENSG00000265148	1.78022	3.43479	0.0131493	0.639746	TSPOAP1-AS1	17	58325450	58415766	+	3601	antisense	TSPOAP1, SUPT4H1 and RNF43 antisense RNA 1 [Source:HGNC Symbol;Acc:HGNC:44148]	-	31	8	0.397335	0.113696
ENSG00000198156	-2.12989	4.37684	0.0132311	0.639746	NPIPB6	16	28342555	28363508	-	2135	protein_coding	nuclear pore complex interacting protein family member B6 [Source:HGNC Symbol;Acc:HGNC:37454]	-	5	20	0.108091	0.479412
ENSG00000253633	-2.12989	4.37684	0.0132311	0.639746	AP002852.1	8	102528740	102538668	+	1231	lincRNA	uncharacterized LOC107986898 [Source:NCBI gene;Acc:107986898]	-	5	20	0.187469	0.831473
ENSG00000177234	1.95349	3.8731	0.0132311	0.639746	LINC01561	10	120597949	120600124	+	2176	lincRNA	long intergenic non-protein coding RNA 1561 [Source:HGNC Symbol;Acc:HGNC:31365]	-	22	5	0.46664	0.117595
ENSG00000159208	-1.49056	2.80999	0.0132402	0.639746	CIART	1	150282543	150287093	+	2696	protein_coding	circadian associated repressor of transcription [Source:HGNC Symbol;Acc:HGNC:25200]	-	17	43	0.291036	0.816253
ENSG00000145002	-1.49056	2.80999	0.0132402	0.639746	FAM86B2	8	12425614	12436343	-	1366	protein_coding	family with sequence similarity 86 member B2 [Source:HGNC Symbol;Acc:HGNC:32222]	-	17	43	0.574402	1.611
ENSG00000132837	3.1566	8.91724	0.0134121	0.639746	DMGDH	5	78997606	79236038	-	5254	protein_coding	dimethylglycine dehydrogenase [Source:HGNC Symbol;Acc:HGNC:24475]	-	11	1	0.0966319	0.00974062
ENSG00000231050	3.2807	9.71829	0.0134121	0.639746	AL109917.1	1	1891471	1892658	+	906	antisense	collagen alpha-2(VIII) chain [Source:NCBI gene;Acc:105378949]	-	12	1	0.611323	0.056487
ENSG00000280502	3.1566	8.91724	0.0134121	0.639746	RF00017	11	118994334	118994630	+	297	misc_RNA		-	11	1	1.70944	0.172314
ENSG00000241563	-3.45507	10.9668	0.0134121	0.639746	CORT	1	10449719	10451902	+	1130	protein_coding	cortistatin [Source:HGNC Symbol;Acc:HGNC:2257]	-	1	11	0.040845	0.498185
ENSG00000274422	-3.45507	10.9668	0.0134121	0.639746	AC245060.5	22	22283928	22287220	-	3293	lincRNA	novel transcript	-	1	11	0.0140161	0.170953
ENSG00000237238	3.1566	8.91724	0.0134121	0.639746	BMS1P10	9	63299453	63385117	-	1596	transcribed_unprocessed_pseudogene	BMS1, ribosome biogenesis factor pseudogene 10 [Source:HGNC Symbol;Acc:HGNC:49154]	-	11	1	0.31811	0.0320659
ENSG00000238260	-3.45507	10.9668	0.0134121	0.639746	AL513320.1	1	3623190	3624743	-	622	antisense	novel transcript	-	1	11	0.074204	0.905063
ENSG00000227256	-3.45507	10.9668	0.0134121	0.639746	MIS18A-AS1	21	32277863	32280988	+	769	antisense	MIS18A antisense RNA 1 [Source:HGNC Symbol;Acc:HGNC:40106]	-	1	11	0.0600194	0.732053
ENSG00000233288	-3.45507	10.9668	0.0134121	0.639746	AC092447.5	7	56534230	56538130	-	2741	lincRNA	uncharacterized LOC101928401 [Source:NCBI gene;Acc:101928401]	-	1	11	0.0168387	0.205381
ENSG00000206838	-3.45507	10.9668	0.0134121	0.639746	SNORA5A	7	45104349	45104482	-	134	snoRNA	small nucleolar RNA, H/ACA box 5A [Source:HGNC Symbol;Acc:HGNC:32588]	-	1	11	0.344439	4.20111
ENSG00000154451	3.1566	8.91724	0.0134121	0.639746	GBP5	1	89258950	89272804	-	8143	protein_coding	guanylate binding protein 5 [Source:HGNC Symbol;Acc:HGNC:19895]	-	11	1	0.0623485	0.00628481
ENSG00000263603	-3.45507	10.9668	0.0134121	0.639746	AC127024.2	17	30729469	30731202	+	894	lincRNA	novel transcript	-	1	11	0.0516274	0.629697
ENSG00000259182	-3.45507	10.9668	0.0134121	0.639746	AC019254.1	15	101168530	101170821	+	762	lincRNA	novel transcript	-	1	11	0.0605707	0.738778
ENSG00000262777	-3.45507	10.9668	0.0134121	0.639746	AC032044.1	17	1424473	1426484	+	691	antisense	novel transcript, antisense to CRK	-	1	11	0.0667943	0.814688
ENSG00000171189	3.1566	8.91724	0.0134121	0.639746	GRIK1	21	29536933	29940033	-	4242	protein_coding	glutamate ionotropic receptor kainate type subunit 1 [Source:HGNC Symbol;Acc:HGNC:4579]	-	11	1	0.119685	0.0120644
ENSG00000130433	3.1566	8.91724	0.0134121	0.639746	CACNG6	19	53992288	54012669	+	1853	protein_coding	calcium voltage-gated channel auxiliary subunit gamma 6 [Source:HGNC Symbol;Acc:HGNC:13625]	-	11	1	0.27399	0.0276186
ENSG00000225230	-3.45507	10.9668	0.0134121	0.639746	AC008937.1	5	56900041	56910714	-	914	antisense	novel transcript	-	1	11	0.0504977	0.615918
ENSG00000274330	-3.45507	10.9668	0.0134121	0.639746	AL160191.3	14	70230224	70232426	+	2203	unprocessed_pseudogene	ADAM metallopeptidase domain 20 (ADAM20) pseudogene	-	1	11	0.0209509	0.255538
ENSG00000113262	-3.45507	10.9668	0.0134121	0.639746	GRM6	5	178977587	178996206	-	8282	protein_coding	glutamate metabotropic receptor 6 [Source:HGNC Symbol;Acc:HGNC:4598]	-	1	11	0.00557292	0.0679726
ENSG00000279205	3.2807	9.71829	0.0134121	0.639746	AC092162.3	2	176822030	176823653	+	1624	TEC	TEC	-	12	1	0.341046	0.031513
ENSG00000278153	-3.45507	10.9668	0.0134121	0.639746	AL121782.1	20	13368291	13368703	-	413	lincRNA	novel transcript	-	1	11	0.111755	1.36307
ENSG00000259726	3.2807	9.71829	0.0134121	0.639746	CSPG4P11	15	84186752	84197384	+	4910	unprocessed_pseudogene	chondroitin sulfate proteoglycan 4 pseudogene 11 [Source:HGNC Symbol;Acc:HGNC:48363]	-	12	1	0.112802	0.0104231
ENSG00000226340	-3.45507	10.9668	0.0134121	0.639746	AC105402.1	2	148872253	148872797	-	545	processed_pseudogene	ubiquitin specific peptidase 8 (USP8) pseudogene	-	1	11	0.0846879	1.03293
ENSG00000279875	-3.45507	10.9668	0.0134121	0.639746	AC074029.4	12	48189349	48191207	+	1859	TEC	TEC	-	1	11	0.0248278	0.302824
ENSG00000182240	1.44902	2.73023	0.013488	0.642139	BACE2	21	41167801	41282518	+	9619	protein_coding	beta-secretase 2 [Source:HGNC Symbol;Acc:HGNC:934]	-	49	16	0.235117	0.0851268
ENSG00000182986	-1.11307	2.16305	0.0137619	0.653925	ZNF320	19	52863790	52897693	-	8310	protein_coding	zinc finger protein 320 [Source:HGNC Symbol;Acc:HGNC:13842]	zf-C2H2	114	221	0.633172	1.36103
ENSG00000213533	1.42009	2.67603	0.01391	0.659681	STIMATE	3	52836219	52897596	-	5730	protein_coding	STIM activating enhancer [Source:HGNC Symbol;Acc:HGNC:30526]	-	54	18	0.434968	0.160766
ENSG00000168386	1.05482	2.07746	0.013936	0.659681	FILIP1L	3	99830141	100114513	-	5903	protein_coding	filamin A interacting protein 1 like [Source:HGNC Symbol;Acc:HGNC:24589]	-	580	250	4.53495	2.16742
ENSG00000213928	-1.26566	2.40436	0.0140684	0.66395	IRF9	14	24161053	24166565	+	3794	protein_coding	interferon regulatory factor 9 [Source:HGNC Symbol;Acc:HGNC:6131]	IRF	38	82	0.462279	1.1061
ENSG00000271327	-1.40486	2.64793	0.0140899	0.66395	AC010201.2	12	89367807	89369301	+	1495	lincRNA	novel transcript	-	21	50	0.64833	1.71161
ENSG00000170917	-1.14729	2.21497	0.0142412	0.66395	NUDT6	4	122888697	122922968	-	6591	protein_coding	nudix hydrolase 6 [Source:HGNC Symbol;Acc:HGNC:8053]	-	71	141	0.497193	1.09482
ENSG00000198786	-1.0155	2.02161	0.0142441	0.66395	MT-ND5	MT	12337	14148	+	1812	protein_coding	mitochondrially encoded NADH:ubiquinone oxidoreductase core subunit 5 [Source:HGNC Symbol;Acc:HGNC:7461]	-	55300	100132	1408.59	2828.08
ENSG00000267510	-2.00978	4.02721	0.0143802	0.66395	AC011451.1	19	9291515	9294482	+	405	antisense	novel transcript, antisense to ZNF699	-	6	22	0.683776	2.78
ENSG00000267769	-2.00978	4.02721	0.0143802	0.66395	AC011498.6	19	4454014	4455286	+	510	antisense	novel transcript, antisense to UBX6	-	6	22	0.542999	2.20764
ENSG00000285863	-2.00978	4.02721	0.0143802	0.66395	AC009554.2	15	61861109	61894164	+	589	antisense	novel transcript, antisense to VPS13C	-	6	22	0.470169	1.91154
ENSG00000243323	-1.38518	2.61205	0.0143995	0.66395	PTPRVP	1	202168051	202189455	+	6596	transcribed_unitary_pseudogene	protein tyrosine phosphatase, receptor type V, pseudogene [Source:HGNC Symbol;Acc:HGNC:13421]	-	23	54	0.16094	0.418976
ENSG00000042832	2.29898	4.9211	0.0144854	0.66395	TG	8	132866958	133134903	+	11132	protein_coding	thyroglobulin [Source:HGNC Symbol;Acc:HGNC:11764]	-	17	3	0.0704845	0.0137919
ENSG00000277128	-2.43013	5.38942	0.0144854	0.66395	AL589743.4	14	19124807	19175530	-	7344	lincRNA	novel transcript	-	3	15	0.0188541	0.104529
ENSG00000235159	-2.43013	5.38942	0.0144854	0.66395	AL121672.2	22	46067356	46069891	-	867	lincRNA	novel transcript	-	3	15	0.159706	0.885419
ENSG00000255559	-2.43013	5.38942	0.0144854	0.66395	ZNF252P-AS1	8	145002811	145006046	+	3236	antisense	ZNF252P antisense RNA 1 [Source:HGNC Symbol;Acc:HGNC:27821]	-	3	15	0.0427888	0.237224
ENSG00000235677	2.29898	4.9211	0.0144854	0.66395	NPM1P26	10	96560185	96560922	+	738	processed_pseudogene	nucleophosmin 1 pseudogene 26 [Source:HGNC Symbol;Acc:HGNC:45205]	-	17	3	1.06319	0.208037
ENSG00000258643	-2.43013	5.38942	0.0144854	0.66395	BCL2L2-PABPN1	14	23306835	23325369	+	1548	protein_coding	BCL2L2-PABPN1 readthrough [Source:HGNC Symbol;Acc:HGNC:42959]	-	3	15	0.0894475	0.495903
ENSG00000279812	2.29898	4.9211	0.0144854	0.66395	AC120057.4	17	7192295	7192448	-	154	TEC	TEC	-	17	3	5.09502	0.996958
ENSG00000239899	-2.43013	5.38942	0.0144854	0.66395	RN7SL674P	2	11584773	11585047	+	275	misc_RNA	RNA, 7SL, cytoplasmic 674, pseudogene [Source:HGNC Symbol;Acc:HGNC:46690]	-	3	15	0.503508	2.79148
ENSG00000249978	2.29898	4.9211	0.0144854	0.66395	TRGV7	7	38335041	38335514	-	353	TR_V_pseudogene	T cell receptor gamma variable 7 (pseudogene) [Source:HGNC Symbol;Acc:HGNC:12293]	-	17	3	2.22276	0.434934
ENSG00000184363	1.33115	2.51604	0.0145328	0.66395	PKP3	11	392614	404908	+	3787	protein_coding	plakophilin 3 [Source:HGNC Symbol;Acc:HGNC:9025]	-	62	22	0.755639	0.297306
ENSG00000102554	1.33115	2.51604	0.0145328	0.66395	KLF5	13	73054976	73077542	+	3893	protein_coding	Kruppel like factor 5 [Source:HGNC Symbol;Acc:HGNC:6349]	zf-C2H2	62	22	0.735064	0.289211
ENSG00000158113	1.61913	3.0719	0.0145837	0.665055	LRRC43	12	122167738	122203471	+	2775	protein_coding	leucine rich repeat containing 43 [Source:HGNC Symbol;Acc:HGNC:28562]	-	38	11	0.632031	0.202865
ENSG00000268230	-1.30176	2.4653	0.0148649	0.676639	AC012313.3	19	58346854	58362751	-	4151	processed_transcript	novel transcript	-	28	62	0.311331	0.764391
ENSG00000253457	-1.51272	2.85348	0.014931	0.678408	SMIM18	8	30638600	30646064	+	955	protein_coding	small integral membrane protein 18 [Source:HGNC Symbol;Acc:HGNC:42973]	-	14	36	0.676616	1.92919
ENSG00000116774	1.02203	2.03078	0.0149873	0.679727	OLFML3	1	113979391	114035572	+	2821	protein_coding	olfactomedin like 3 [Source:HGNC Symbol;Acc:HGNC:24956]	-	1619	714	26.4888	12.953
ENSG00000257354	1.16141	2.23675	0.0150573	0.681659	AC048341.1	12	62602752	62622213	+	8693	lincRNA	novel transcript	-	150	60	0.796415	0.35323
ENSG00000198695	-1.00549	2.00762	0.0152552	0.689362	MT-ND6	MT	14149	14673	-	525	protein_coding	mitochondrially encoded NADH:ubiquinone oxidoreductase core subunit 6 [Source:HGNC Symbol;Acc:HGNC:7462]	-	15663	28165	1377	2745.53
ENSG00000270890	-1.72741	3.31133	0.0153054	0.690379	AL049844.2	6	143858062	143858689	-	628	processed_pseudogene	synaptophysin-like 1 (SYPL1) pseudogene	-	8	24	0.58796	1.95582
ENSG00000188763	1.11006	2.15855	0.0153592	0.691554	FZD9	7	73433783	73436120	+	2338	protein_coding	frizzled class receptor 9 [Source:HGNC Symbol;Acc:HGNC:4047]	-	205	85	4.04694	1.86059
ENSG00000226508	-1.47329	2.77655	0.0154873	0.694717	LINC01918	2	105144113	105145424	+	1009	lincRNA	long intergenic non-protein coding RNA 1918 [Source:HGNC Symbol;Acc:HGNC:52737]	-	16	40	0.731891	2.02883
ENSG00000280135	1.48532	2.79979	0.0154873	0.694717	AL096816.1	6	107697299	107700218	-	2920	TEC	TEC	-	44	14	0.695485	0.24537
ENSG00000183508	1.08616	2.12308	0.0155132	0.694717	TENT5C	1	117605934	117628372	+	5751	protein_coding	terminal nucleotidyltransferase 5C [Source:HGNC Symbol;Acc:HGNC:24712]	-	268	113	2.15085	1.00557
ENSG00000205583	-1.24577	2.37145	0.01555	0.695117	STAG3L1	7	75359194	75395383	+	2094	transcribed_unprocessed_pseudogene	stromal antigen 3-like 1 (pseudogene) [Source:HGNC Symbol;Acc:HGNC:33852]	-	39	83	0.859618	2.02851
ENSG00000100867	1.21394	2.3197	0.0156217	0.697071	DHRS2	14	23630115	23645639	+	7556	protein_coding	dehydrogenase/reductase 2 [Source:HGNC Symbol;Acc:HGNC:18349]	-	96	37	0.586404	0.250603
ENSG00000145861	1.19704	2.29269	0.0156835	0.698502	C1QTNF2	5	160347751	160370641	-	2414	protein_coding	C1q and TNF related 2 [Source:HGNC Symbol;Acc:HGNC:14325]	-	100	39	1.91197	0.826806
ENSG00000015568	1.45053	2.73309	0.0157099	0.698502	RGPD5	2	109792758	109857695	+	14175	protein_coding	RANBP2-like and GRIP domain containing 5 [Source:HGNC Symbol;Acc:HGNC:32418]	-	46	15	0.14978	0.0541558
ENSG00000274512	-1.18648	2.27597	0.0157829	0.700496	TBC1D3L	17	37977972	37989048	-	2248	protein_coding	TBC1 domain family member 3L [Source:HGNC Symbol;Acc:HGNC:51246]	-	48	98	0.985514	2.23103
ENSG00000247095	-1.4418	2.71659	0.0159028	0.70383	MIR210HG	11	565660	568457	-	2321	lincRNA	MIR210 host gene [Source:HGNC Symbol;Acc:HGNC:39524]	-	18	44	0.357944	0.970184
ENSG00000156113	1.17258	2.25414	0.0159146	0.70383	KCNMA1	10	76869601	77638369	-	35644	protein_coding	potassium calcium-activated channel subfamily M alpha 1 [Source:HGNC Symbol;Acc:HGNC:6284]	-	126	50	0.163156	0.0717894
ENSG00000021645	1.82369	3.53984	0.0160516	0.707376	NRXN3	14	78170373	79868290	+	15535	protein_coding	neurexin 3 [Source:HGNC Symbol;Acc:HGNC:8010]	-	28	7	0.0831887	0.0230602
ENSG00000140465	1.82369	3.53984	0.0160516	0.707376	CYP1A1	15	74719542	74725610	-	3435	protein_coding	cytochrome P450 family 1 subfamily A member 1 [Source:HGNC Symbol;Acc:HGNC:2595]	-	28	7	0.376226	0.104291
ENSG00000210195	-1.37579	2.59509	0.0163423	0.713742	MT-TT	MT	15888	15953	+	66	Mt_tRNA	mitochondrially encoded tRNA threonine [Source:HGNC Symbol;Acc:HGNC:7499]	-	21	49	14.6856	37.9952
ENSG00000260101	-2.20961	4.62549	0.0164929	0.713742	AC008074.2	2	64522187	64524093	-	1907	lincRNA	uncharacterized LOC101927402 [Source:NCBI gene;Acc:101927402]	-	4	17	0.0968115	0.45622
ENSG00000263597	-2.20961	4.62549	0.0164929	0.713742	MIR3936	5	132365490	132365599	-	110	miRNA	microRNA 3936 [Source:HGNC Symbol;Acc:HGNC:38947]	-	4	17	1.67836	7.9092
ENSG00000226781	-2.20961	4.62549	0.0164929	0.713742	TBCAP1	X	33041395	33041721	+	327	processed_pseudogene	tubulin folding cofactor A pseudogene 1 [Source:HGNC Symbol;Acc:HGNC:42630]	-	4	17	0.564586	2.66059
ENSG00000215210	2.05697	4.16111	0.0164929	0.713742	RBMXP2	9	30689105	30690272	+	1168	processed_pseudogene	RBMX pseudogene 2 [Source:HGNC Symbol;Acc:HGNC:23284]	-	19	4	0.750807	0.175264
ENSG00000258302	-2.20961	4.62549	0.0164929	0.713742	AC025034.1	12	89561129	89594878	+	1711	antisense	novel transcript, antisense to ATP2B1	-	4	17	0.107902	0.508482
ENSG00000279530	-2.20961	4.62549	0.0164929	0.713742	AC092881.1	12	70321542	70324274	-	2733	TEC	TEC	-	4	17	0.067552	0.318336
ENSG00000258777	2.05697	4.16111	0.0164929	0.713742	HIF1A-AS1	14	61681041	61695823	-	652	lincRNA	HIF1A antisense RNA 1 [Source:HGNC Symbol;Acc:HGNC:43014]	-	19	4	1.345	0.313971
ENSG00000259804	-2.20961	4.62549	0.0164929	0.713742	AC027682.1	16	67561411	67562309	-	899	antisense	novel transcript, antisense to CTCF	-	4	17	0.205361	0.967756
ENSG00000224975	-1.35827	2.56378	0.0165489	0.713742	INE1	X	47204921	47205865	+	945	sense_intronic	inactivation escape 1 [Source:HGNC Symbol;Acc:HGNC:6060]	-	23	53	1.12335	2.87026
ENSG00000153993	1.06795	2.09646	0.0166295	0.713742	SEMA3D	7	84995553	85186855	-	8062	protein_coding	semaphorin 3D [Source:HGNC Symbol;Acc:HGNC:10726]	-	274	117	1.56865	0.74271
ENSG00000260806	-1.63155	3.09846	0.0166546	0.713742	AL163051.1	14	96500810	96502321	-	1512	antisense	novel transcript, antisense to PAPOLA	-	10	28	0.305257	0.947726
ENSG00000162944	-1.63155	3.09846	0.0166546	0.713742	RFTN2	2	197568224	197676045	-	6007	protein_coding	raftlin family member 2 [Source:HGNC Symbol;Acc:HGNC:26402]	-	10	28	0.0768352	0.238549
ENSG00000259529	-1.63155	3.09846	0.0166546	0.713742	AL136295.5	14	24151218	24167402	+	4798	protein_coding	novel transcript	-	10	28	0.0961961	0.298658
ENSG00000225544	1.73312	3.32446	0.0166546	0.713742	AC245452.2	22	21885282	21885673	-	392	processed_pseudogene	pseudogene similar to part of metallophosphoesterase 1 (MPPE1)	-	30	8	3.53226	1.04443
ENSG00000135346	-1.63155	3.09846	0.0166546	0.713742	CGA	6	87085498	87095406	-	2284	protein_coding	glycoprotein hormones, alpha polypeptide [Source:HGNC Symbol;Acc:HGNC:1885]	-	10	28	0.202079	0.627391
ENSG00000247373	-1.27835	2.42561	0.0168258	0.71984	AC055713.1	12	123575891	123585115	-	8279	lincRNA	novel transcript	-	28	61	0.156098	0.377076
ENSG00000104883	1.30663	2.47364	0.0169166	0.722426	PEX11G	19	7476875	7497449	-	1466	protein_coding	peroxisomal biogenesis factor 11 gamma [Source:HGNC Symbol;Acc:HGNC:20208]	-	72	26	2.26682	0.907645
ENSG00000104998	1.02268	2.03169	0.0169443	0.722426	IL27RA	19	14031748	14053216	+	2962	protein_coding	interleukin 27 receptor subunit alpha [Source:HGNC Symbol;Acc:HGNC:17290]	-	633	279	9.86362	4.82054
ENSG00000149243	1.21997	2.32943	0.0170867	0.723464	KLHL35	11	75422394	75430629	-	5041	protein_coding	kelch like family member 35 [Source:HGNC Symbol;Acc:HGNC:26597]	-	86	33	0.787407	0.335022
ENSG00000113212	1.21997	2.32943	0.0170867	0.723464	PCDHB7	5	141172619	141176383	+	3765	protein_coding	protocadherin beta 7 [Source:HGNC Symbol;Acc:HGNC:8692]	-	86	33	1.05427	0.448565
ENSG00000197180	1.19885	2.29557	0.0171218	0.723464	CH17-340M24.3	X	154424380	154428479	-	598	lincRNA	uncharacterized protein BC009467 [Source:NCBI gene;Acc:158960]	-	95	37	7.3323	3.16648
ENSG00000163235	1.70246	3.25455	0.017143	0.723464	TGFA	2	70447280	70554193	-	4963	protein_coding	transforming growth factor alpha [Source:HGNC Symbol;Acc:HGNC:11765]	-	33	9	0.306893	0.0928057
ENSG00000144227	1.70246	3.25455	0.017143	0.723464	NXPH2	2	138670772	138780348	-	1052	protein_coding	neurexophilin 2 [Source:HGNC Symbol;Acc:HGNC:8076]	-	33	9	1.44782	0.437828
ENSG00000135842	1.01275	2.01775	0.0175265	0.727696	FAM129A	1	184790724	184974550	-	8372	protein_coding	family with sequence similarity 129 member A [Source:HGNC Symbol;Acc:HGNC:16784]	-	703	312	3.87564	1.90722
ENSG00000201457	-1.5179	2.86375	0.0175391	0.727696	SNORA55	1	39567374	39567508	-	135	snoRNA	small nucleolar RNA, H/ACA box 55 [Source:HGNC Symbol;Acc:HGNC:32649]	-	12	31	4.10266	11.7518
ENSG00000227540	-1.4935	2.81571	0.0178604	0.727696	DNAJC9-AS1	10	73252791	73254349	+	940	antisense	DNAJC9 antisense RNA 1 [Source:NCBI gene;Acc:414245]	-	13	33	0.638312	1.79665
ENSG00000269139	1.58079	2.99134	0.0178604	0.727696	AC010336.5	19	7926001	7926810	+	714	processed_transcript	novel transcript, antisense to CTXN1 and TIMM44	-	37	11	2.39178	0.788444
ENSG00000260528	-2.66592	6.34632	0.0178622	0.727696	FAM157C	16	90102271	90178344	+	4524	lincRNA	family with sequence similarity 157 member C [Source:HGNC Symbol;Acc:HGNC:34081]	-	2	12	0.0204045	0.135749
ENSG00000227857	2.57914	5.97585	0.0178622	0.727696	AL358075.2	1	46134531	46139081	+	339	antisense	uncharacterized LOC101929626 [Source:NCBI gene;Acc:101929626]	-	14	2	1.9061	0.30193
ENSG00000214770	-2.66592	6.34632	0.0178622	0.727696	AL161756.1	14	64329431	64338639	-	3351	antisense	novel transcript	-	2	12	0.0275469	0.183267
ENSG00000265917	-2.66592	6.34632	0.0178622	0.727696	MIR3685	12	95309923	95309984	+	62	miRNA	microRNA 3685 [Source:HGNC Symbol;Acc:HGNC:38886]	-	2	12	1.48887	9.90526
ENSG00000232906	-2.66592	6.34632	0.0178622	0.727696	AC092685.1	7	65355934	65357176	+	1243	processed_pseudogene	novel pseudogene containing a Zinc finger, C2H2 type domain	-	2	12	0.0742637	0.494068
ENSG00000284882	-2.66592	6.34632	0.0178622	0.727696	AL359762.1	1	84574129	84583620	+	1183	bidirectional_promoter_lncRNA	uncharacterized LOC105378819 [Source:NCBI gene;Acc:105378819]	-	2	12	0.0780302	0.519126
ENSG00000189045	-2.66592	6.34632	0.0178622	0.727696	ANKDD1B	5	75611459	75671846	+	3287	protein_coding	ankyrin repeat and death domain containing 1B [Source:HGNC Symbol;Acc:HGNC:32525]	-	2	12	0.0280833	0.186835
ENSG00000215097	-2.66592	6.34632	0.0178622	0.727696	DUSP8P3	10	46774421	46776180	-	1760	processed_pseudogene	dual specificity phosphatase 8 pseudogene 3 [Source:HGNC Symbol;Acc:HGNC:3077]	-	2	12	0.0524487	0.348935
ENSG00000115828	-2.66592	6.34632	0.0178622	0.727696	QPCT	2	37342827	37373322	+	2696	protein_coding	glutaminyl-peptide cyclotransferase [Source:HGNC Symbol;Acc:HGNC:9753]	-	2	12	0.0342395	0.227792
ENSG00000270497	-2.66592	6.34632	0.0178622	0.727696	BX322635.1	X	53065053	53065548	-	496	processed_pseudogene	ribosomal protein S3A (RPS3A) pseudogene	-	2	12	0.186108	1.23816
ENSG00000201988	-2.66592	6.34632	0.0178622	0.727696	RF00019	6	30736304	30736414	-	111	misc_RNA		-	2	12	0.83162	5.53267
ENSG00000261800	2.57914	5.97585	0.0178622	0.727696	AC023824.5	16	35143722	35144881	+	703	lincRNA	novel transcript	-	14	2	0.919159	0.145597
ENSG00000200847	-2.66592	6.34632	0.0178622	0.727696	RF00019	7	23491792	23491893	-	102	misc_RNA		-	2	12	0.904998	6.02085
ENSG00000278959	-2.66592	6.34632	0.0178622	0.727696	AC006378.2	7	93954044	93956519	-	2476	TEC	tec	-	2	12	0.0372818	0.248032
ENSG00000215912	-2.05633	4.15928	0.0180032	0.727696	TTC34	1	2635976	2801717	-	8814	protein_coding	tetratricopeptide repeat domain 34 [Source:HGNC Symbol;Acc:HGNC:34297]	-	5	19	0.0261827	0.110321
ENSG00000235688	-2.05633	4.15928	0.0180032	0.727696	AC116614.1	2	949627	950274	-	539	antisense	novel transcript	-	5	19	0.428153	1.80402
ENSG00000130812	1.88678	3.6981	0.0180032	0.727696	ANGPTL6	19	10092338	10102796	-	2181	protein_coding	angiopoietin like 6 [Source:HGNC Symbol;Acc:HGNC:23140]	-	21	5	0.444407	0.117325
ENSG00000274818	1.88678	3.6981	0.0180032	0.727696	AC004825.2	14	70906657	70907111	-	455	lincRNA	novel transcript	-	21	5	2.13023	0.562387
ENSG00000261737	1.88678	3.6981	0.0180032	0.727696	AL049597.2	1	86703502	86704462	-	961	antisense	uncharacterized LOC105378828 [Source:NCBI gene;Acc:105378828]	-	21	5	1.00859	0.266271
ENSG00000223403	-2.05633	4.15928	0.0180032	0.727696	MEG9	14	101064151	101072937	+	3212	lincRNA	maternally expressed 9 [Source:HGNC Symbol;Acc:HGNC:43874]	-	5	19	0.0718476	0.302729
ENSG00000186998	1.02449	2.03424	0.0180623	0.728901	EMID1	22	29205851	29259597	+	4899	protein_coding	EMI domain containing 1 [Source:HGNC Symbol;Acc:HGNC:18036]	-	468	206	4.40916	2.15197
ENSG00000166750	1.53223	2.89232	0.0181211	0.728914	SLFN5	17	35243036	35273655	+	10709	protein_coding	schlafen family member 5 [Source:HGNC Symbol;Acc:HGNC:28286]	-	39	12	0.168087	0.0573467
ENSG00000254428	-1.47221	2.77447	0.0181211	0.728914	AP003392.1	11	119003742	119004893	-	523	antisense	novel transcript, antisense to CCDC84	-	14	35	1.2355	3.42486
ENSG00000187398	1.45225	2.73635	0.0185027	0.732335	LUZP2	11	24496970	25082631	+	8851	protein_coding	leucine zipper protein 2 [Source:HGNC Symbol;Acc:HGNC:23206]	-	43	14	0.22423	0.0809491
ENSG00000229267	-1.43687	2.70734	0.0185027	0.732335	AC016708.1	2	214810229	214963274	+	2108	antisense	uncharacterized LOC101928103 [Source:NCBI gene;Acc:101928103]	-	16	39	0.350322	0.946827
ENSG00000275966	-1.43687	2.70734	0.0185027	0.732335	AC110285.6	17	81345476	81345966	-	491	lincRNA	novel transcript	-	16	39	1.50403	4.06499
ENSG00000279069	-1.1427	2.20794	0.0185073	0.732335	AC015813.5	17	58006674	58008187	+	1514	TEC	novel transcript	-	51	101	1.55476	3.41407
ENSG00000076716	1.01341	2.01867	0.0185174	0.732335	GPC4	X	133300103	133415490	-	4960	protein_coding	glypican 4 [Source:HGNC Symbol;Acc:HGNC:4452]	-	514	228	4.78299	2.3525
ENSG00000126950	1.02031	2.02836	0.018574	0.732335	TMEM35A	X	101078720	101096364	+	2571	protein_coding	transmembrane protein 35A [Source:HGNC Symbol;Acc:HGNC:25864]	-	444	196	7.97074	3.90149
ENSG00000058866	1.41892	2.67384	0.0186397	0.732335	DGKG	3	186105668	186362237	-	10978	protein_coding	diacylglycerol kinase gamma [Source:HGNC Symbol;Acc:HGNC:2853]	-	45	15	0.189194	0.0699269
ENSG00000228049	-1.40872	2.65501	0.018749	0.732335	POLR2J2	7	102665368	102671629	-	2065	protein_coding	RNA polymerase II subunit J2 [Source:HGNC Symbol;Acc:HGNC:23208]	-	18	43	0.402319	1.06568
ENSG00000256139	-1.40872	2.65501	0.018749	0.732335	AC007637.1	12	109111218	109125594	+	910	sense_overlapping	novel transcript	-	18	43	0.912954	2.41826
ENSG00000100031	-1.39668	2.63295	0.0188353	0.732335	GGT1	22	24583750	24629005	+	4434	protein_coding	gamma-glutamyltransferase 1 [Source:HGNC Symbol;Acc:HGNC:4250]	-	19	45	0.197777	0.51939
ENSG00000285804	-1.21805	2.32632	0.0189502	0.732335	AC093218.1	5	72095855	72108000	-	2641	antisense	uncharacterized LOC105379028 [Source:NCBI gene;Acc:105379028]	-	34	71	0.594194	1.37584
ENSG00000179915	1.00929	2.01292	0.0190055	0.732335	NRXN1	2	49918505	51225575	-	24320	protein_coding	neurexin 1 [Source:HGNC Symbol;Acc:HGNC:8008]	-	544	242	1.03241	0.509247
ENSG00000167371	-1.0066	2.00916	0.0190186	0.732335	PRRT2	16	29811382	29815892	+	3755	protein_coding	proline rich transmembrane protein 2 [Source:HGNC Symbol;Acc:HGNC:30500]	-	270	486	3.31873	6.62373
ENSG00000189398	-1.25455	2.38592	0.0190443	0.732335	OR7E12P	11	3390780	3391752	-	973	unprocessed_pseudogene	olfactory receptor family 7 subfamily E member 12 pseudogene [Source:HGNC Symbol;Acc:HGNC:8383]	-	28	60	1.3282	3.15584
ENSG00000154080	1.75977	3.38644	0.0191374	0.732335	CHST9	18	26906481	27185317	-	11521	protein_coding	carbohydrate sulfotransferase 9 [Source:HGNC Symbol;Acc:HGNC:19898]	-	23	6	0.0921415	0.0266525
ENSG00000228812	-1.94303	3.84513	0.0191374	0.732335	LAMA5-AS1	20	62352995	62356480	+	843	antisense	LAMA5 antisense RNA 1 [Source:HGNC Symbol;Acc:HGNC:40334]	-	6	21	0.328505	1.27488
ENSG00000108958	-1.94303	3.84513	0.0191374	0.732335	AC130689.1	17	1858039	1858446	-	408	processed_pseudogene	succinate dehydrogenase complex, subunit C, integral membrane protein, 15kDa (SDHC) pseudogene	-	6	21	0.678748	2.63412
ENSG00000183281	-1.94303	3.84513	0.0191374	0.732335	PLGLB1	2	87002559	87021852	-	3220	protein_coding	plasminogen-like B1 [Source:HGNC Symbol;Acc:HGNC:9072]	-	6	21	0.0860029	0.333764
ENSG00000143674	-1.04413	2.06213	0.0192306	0.732335	MAP3K21	1	233327768	233385148	+	7916	protein_coding	mitogen-activated protein kinase kinase kinase 21 [Source:HGNC Symbol;Acc:HGNC:29798]	-	125	231	0.728823	1.49342
ENSG00000285571	-1.66632	3.17403	0.0199879	0.732335	AL513548.4	6	26677003	26683211	+	1114	lincRNA	novel transcript	-	8	23	0.331453	1.05662
ENSG00000138623	1.16747	2.24618	0.0201186	0.732335	SEMA7A	15	74409289	74433958	-	3800	protein_coding	semaphorin 7A (John Milton Hagen blood group) [Source:HGNC Symbol;Acc:HGNC:10741]	-	108	43	1.31177	0.57911
ENSG00000259985	1.05997	2.08489	0.0202045	0.732335	AC017100.1	18	31685655	31686823	+	1169	antisense	novel transcript, antisense to B4GALT6	-	198	85	7.81751	3.72118
ENSG00000258938	1.77147	3.41401	0.0206238	0.732335	AL162311.3	14	35819224	35826765	-	2867	antisense	novel transcript, antisense to BRMS1L	-	27	7	0.434664	0.124953
ENSG00000188603	-1.6187	3.07098	0.0206238	0.732335	CLN3	16	28474111	28495575	-	9858	protein_coding	CLN3, battenin [Source:HGNC Symbol;Acc:HGNC:2074]	-	9	25	0.0421378	0.129786
ENSG00000226864	-1.6187	3.07098	0.0206238	0.732335	ATE1-AS1	10	121928312	121951965	+	1172	transcribed_unitary_pseudogene	ATE1 antisense RNA 1 [Source:HGNC Symbol;Acc:HGNC:49496]	-	9	25	0.354432	1.09166
ENSG00000078725	1.09816	2.14082	0.0207729	0.732335	BRINP1	9	119153458	119369467	-	3905	protein_coding	BMP/retinoic acid inducible neural specific 1 [Source:HGNC Symbol;Acc:HGNC:2687]	-	134	56	1.5838	0.733911
ENSG00000102890	-1.05998	2.0849	0.0209333	0.732335	ELMO3	16	67199111	67204029	+	2575	protein_coding	engulfment and cell motility 3 [Source:HGNC Symbol;Acc:HGNC:17289]	-	99	185	1.7745	3.67681
ENSG00000139971	2.21221	4.63386	0.0209521	0.732335	ARMH4	14	57999735	58298139	-	7565	protein_coding	armadillo-like helical domain containing 4 [Source:HGNC Symbol;Acc:HGNC:19846]	-	16	3	0.0976178	0.020295
ENSG00000236404	-2.3314	5.03294	0.0209521	0.732335	VLDLR-AS1	9	2421597	2643359	-	5989	antisense	VLDLR antisense RNA 1 [Source:HGNC Symbol;Acc:HGNC:49621]	-	3	14	0.0231198	0.119633
ENSG00000260641	2.21221	4.63386	0.0209521	0.732335	AC114811.2	4	98658904	98664550	+	5647	antisense	novel transcript, antisense TSPAN5	-	16	3	0.130774	0.0271882
ENSG00000177669	-2.3314	5.03294	0.0209521	0.732335	MBOAT4	8	30131824	30144686	-	1512	protein_coding	membrane bound O-acyltransferase domain containing 4 [Source:HGNC Symbol;Acc:HGNC:32311]	-	3	14	0.0915772	0.473863
ENSG00000229931	-2.3314	5.03294	0.0209521	0.732335	AL137003.1	6	16761138	16762652	+	698	antisense	uncharacterized LOC101928433 [Source:NCBI gene;Acc:101928433]	-	3	14	0.198373	1.02648
ENSG00000221819	-2.3314	5.03294	0.0209521	0.732335	GAS8-AS1	16	90028908	90029901	-	994	antisense	GAS8 antisense RNA 1 [Source:HGNC Symbol;Acc:HGNC:1197]	-	3	14	0.1393	0.720806
ENSG00000227165	2.21221	4.63386	0.0209521	0.732335	WDR11-AS1	10	120761812	120851345	-	4685	antisense	WDR11 antisense RNA 1 [Source:HGNC Symbol;Acc:HGNC:27437]	-	16	3	0.157626	0.0327709
ENSG00000144550	-2.3314	5.03294	0.0209521	0.732335	CPNE9	3	9703807	9729908	+	2335	protein_coding	copine family member 9 [Source:HGNC Symbol;Acc:HGNC:24336]	-	3	14	0.0592996	0.306844
ENSG00000184389	-2.3314	5.03294	0.0209521	0.732335	A3GALT2	1	33306766	33321098	-	1023	protein_coding	alpha 1,3-galactosyltransferase 2 [Source:HGNC Symbol;Acc:HGNC:30005]	-	3	14	0.135352	0.700372
ENSG00000224271	-1.57931	2.98826	0.0210963	0.732335	AL117329.1	22	47631674	47855600	+	2276	lincRNA	uncharacterized LOC284930 [Source:NCBI gene;Acc:284930]	-	10	27	0.20279	0.607111
ENSG00000237015	-1.57931	2.98826	0.0210963	0.732335	AL031186.1	22	29260889	29262037	+	385	antisense	novel transcript	-	10	27	1.19883	3.58905
ENSG00000205482	-1.54617	2.92041	0.0214439	0.732335	SPDYE18	7	77052785	77060512	-	1050	unprocessed_pseudogene	speedy/RINGO cell cycle regulator family member E18 [Source:HGNC Symbol;Acc:HGNC:51514]	-	11	29	0.483527	1.41347
ENSG00000231982	3.0208	8.11618	0.0215665	0.732335	AC112907.2	3	186826549	186827337	+	330	unprocessed_pseudogene	MCF.2 cell line derived transforming sequence-like 2 (MCF2L2) pseudogene	-	10	1	1.39863	0.155082
ENSG00000261761	-3.3191	9.98043	0.0215665	0.732335	AL136537.2	4	37001816	37020708	+	2534	processed_transcript	uncharacterized LOC100508631 [Source:NCBI gene;Acc:100508631]	-	1	10	0.0182142	0.201962
ENSG00000198796	3.0208	8.11618	0.0215665	0.732335	ALPK2	18	58481247	58628957	-	9431	protein_coding	alpha kinase 2 [Source:HGNC Symbol;Acc:HGNC:20565]	-	10	1	0.0489396	0.00542649
ENSG00000273305	3.0208	8.11618	0.0215665	0.732335	AC009237.15	2	95537969	95538469	+	501	lincRNA	novel transcript	-	10	1	0.921255	0.10215
ENSG00000235558	3.0208	8.11618	0.0215665	0.732335	GUSBP9	5	71220356	71259238	-	423	unprocessed_pseudogene	glucuronidase, beta pseudogene 9 [Source:NCBI gene;Acc:100049076]	-	10	1	1.09113	0.120986
ENSG00000129167	-3.3191	9.98043	0.0215665	0.732335	TPH1	11	18017564	18042426	-	5626	protein_coding	tryptophan hydroxylase 1 [Source:HGNC Symbol;Acc:HGNC:12008]	-	1	10	0.00820386	0.0909655
ENSG00000199266	-3.3191	9.98043	0.0215665	0.732335	SNORA60	20	38449370	38449503	+	134	snoRNA	small nucleolar RNA, H/ACA box 60 [Source:HGNC Symbol;Acc:HGNC:32654]	-	1	10	0.344439	3.81919
ENSG00000229222	-3.3191	9.98043	0.0215665	0.732335	KRT18P4	20	49956745	49958032	+	1288	processed_pseudogene	keratin 18 pseudogene 4 [Source:HGNC Symbol;Acc:HGNC:16604]	-	1	10	0.0358345	0.397338
ENSG00000169314	3.0208	8.11618	0.0215665	0.732335	C22orf15	22	23763021	23765861	+	2086	protein_coding	chromosome 22 open reading frame 15 [Source:HGNC Symbol;Acc:HGNC:15558]	-	10	1	0.22126	0.0245336
ENSG00000280022	3.0208	8.11618	0.0215665	0.732335	AC126544.1	17	45592621	45593369	+	749	TEC	TEC	-	10	1	0.61622	0.0683274
ENSG00000280157	3.0208	8.11618	0.0215665	0.732335	AL359510.2	1	228121523	228123771	+	2249	TEC	TEC	-	10	1	0.205224	0.0227555
ENSG00000237361	-3.3191	9.98043	0.0215665	0.732335	TUSC8	13	44400250	44405984	-	1334	lincRNA	tumor suppressor candidate 8 [Source:HGNC Symbol;Acc:HGNC:49111]	-	1	10	0.0345989	0.383637
ENSG00000271871	3.0208	8.11618	0.0215665	0.732335	AC005740.4	5	141952419	141953375	+	957	antisense	novel transcript, antisense to PCDH12	-	10	1	0.482287	0.0534767
ENSG00000200769	-3.3191	9.98043	0.0215665	0.732335	RF00019	7	92202243	92202334	-	92	misc_RNA		-	1	10	0.501684	5.56274
ENSG00000249889	-3.3191	9.98043	0.0215665	0.732335	ALG1L11P	8	12178697	12182719	+	450	unprocessed_pseudogene	asparagine-linked glycosylation 1-like 11, pseudogene [Source:HGNC Symbol;Acc:HGNC:44380]	-	1	10	0.102566	1.13727
ENSG00000173080	3.0208	8.11618	0.0215665	0.732335	RXFP4	1	155941710	155942949	+	1240	protein_coding	relaxin family peptide/INSL5 receptor 4 [Source:HGNC Symbol;Acc:HGNC:14666]	-	10	1	0.372217	0.0412719
ENSG00000279168	-3.3191	9.98043	0.0215665	0.732335	AC105052.4	7	102579104	102679295	-	1241	sense_overlapping	novel transcript, sense overlapping POLR2J2, UPK3BL and RASA4	-	1	10	0.0371917	0.412387
ENSG00000100365	3.0208	8.11618	0.0215665	0.732335	NCF4	22	36860988	36878015	+	1759	protein_coding	neutrophil cytosolic factor 4 [Source:HGNC Symbol;Acc:HGNC:7662]	-	10	1	0.262393	0.0290945
ENSG00000214077	3.0208	8.11618	0.0215665	0.732335	GNAQP1	2	131423801	131424867	-	1067	processed_pseudogene	G protein subunit alpha q pseudogene 1 [Source:HGNC Symbol;Acc:HGNC:4391]	-	10	1	0.432567	0.0479636
ENSG00000249619	3.0208	8.11618	0.0215665	0.732335	HMGN1P13	5	111572102	111572239	-	138	processed_pseudogene	high mobility group nucleosome binding domain 1 pseudogene 13 [Source:HGNC Symbol;Acc:HGNC:39357]	-	10	1	3.34456	0.370849
ENSG00000124731	3.0208	8.11618	0.0215665	0.732335	TREM1	6	41267926	41286719	-	4329	protein_coding	triggering receptor expressed on myeloid cells 1 [Source:HGNC Symbol;Acc:HGNC:17760]	-	10	1	0.106618	0.0118219
ENSG00000135407	-1.12836	2.1861	0.021619	0.732335	AVIL	12	57797376	57818704	-	5889	protein_coding	advillin [Source:HGNC Symbol;Acc:HGNC:14188]	-	51	100	0.399711	0.86903
ENSG00000272767	1.03965	2.05573	0.0217496	0.732335	JMJD1C-AS1	10	63465229	63466563	+	1335	antisense	JMJD1C antisense RNA 1 [Source:HGNC Symbol;Acc:HGNC:28222]	-	209	91	7.22575	3.48848
ENSG00000169884	1.31568	2.4892	0.0219798	0.732335	WNT10B	12	48965340	48971763	-	2629	protein_coding	Wnt family member 10B [Source:HGNC Symbol;Acc:HGNC:12775]	-	53	19	0.930471	0.369862
ENSG00000175294	1.49488	2.81841	0.0219911	0.732335	CATSPER1	11	66016752	66026517	-	2687	protein_coding	cation channel sperm associated 1 [Source:HGNC Symbol;Acc:HGNC:17116]	-	38	12	0.65273	0.228555
ENSG00000253203	1.33252	2.51842	0.0220737	0.732335	GUSBP3	5	69639459	69679259	-	1296	transcribed_unprocessed_pseudogene	glucuronidase, beta pseudogene 3 [Source:HGNC Symbol;Acc:HGNC:37301]	-	48	17	1.70944	0.671306
ENSG00000159496	-1.36435	2.57459	0.0220737	0.732335	RGL4	22	23688136	23699176	+	4715	protein_coding	ral guanine nucleotide dissociation stimulator like 4 [Source:HGNC Symbol;Acc:HGNC:31911]	-	19	44	0.18599	0.477581
ENSG00000115252	-1.12501	2.18102	0.0220981	0.732335	PDE1A	2	182140036	182523192	-	6322	protein_coding	phosphodiesterase 1A [Source:HGNC Symbol;Acc:HGNC:8774]	-	46	90	0.335831	0.728559
ENSG00000266066	-1.37486	2.59344	0.0221021	0.732335	POLRMTP1	17	62136972	62140639	-	3668	processed_pseudogene	RNA polymerase mitochondrial pseudogene 1 [Source:HGNC Symbol;Acc:HGNC:28865]	-	18	42	0.226496	0.585998
ENSG00000207741	-1.39951	2.63813	0.022103	0.732335	MIR590	7	74191198	74191294	+	97	miRNA	microRNA 590 [Source:HGNC Symbol;Acc:HGNC:32846]	-	16	38	7.61318	20.0488
ENSG00000214279	-1.38652	2.61448	0.0221135	0.732335	SCART1	10	133453928	133523558	+	8015	protein_coding	scavenger receptor family member expressed on T cells 1 [Source:HGNC Symbol;Acc:HGNC:32411]	-	17	40	0.0978956	0.255407
ENSG00000226314	-1.12424	2.17987	0.0222026	0.732335	ZNF192P1	6	28161769	28169594	+	2547	transcribed_unprocessed_pseudogene	zinc finger protein 192 pseudogene 1 [Source:HGNC Symbol;Acc:HGNC:18777]	-	45	88	0.815457	1.7682
ENSG00000121039	1.01403	2.01954	0.0226555	0.732335	RDH10	8	73294612	73325281	+	5321	protein_coding	retinol dehydrogenase 10 [Source:HGNC Symbol;Acc:HGNC:19975]	-	291	129	2.52416	1.24072
ENSG00000144331	5.75699	54.0789	0.0226768	0.732335	ZNF385B	2	179441982	179861505	-	5310	protein_coding	zinc finger protein 385B [Source:HGNC Symbol;Acc:HGNC:26332]	-	7	0	0.0608445	0
ENSG00000257636	-5.91316	60.2613	0.0226768	0.732335	G2E3-AS1	14	30437992	30573629	-	1669	antisense	G2E3 antisense RNA 1 [Source:HGNC Symbol;Acc:HGNC:53463]	-	0	7	0	0.214644
ENSG00000258940	-5.91316	60.2613	0.0226768	0.732335	AL132639.2	14	39265703	39267061	-	1359	antisense	uncharacterized LOC100288846 [Source:NCBI gene;Acc:100288846]	-	0	7	0	0.263606
ENSG00000186326	5.75699	54.0789	0.0226768	0.732335	RGS9BP	19	32675407	32678300	+	2894	protein_coding	regulator of G protein signaling 9 binding protein [Source:HGNC Symbol;Acc:HGNC:30304]	-	7	0	0.111639	0
ENSG00000204531	-5.91316	60.2613	0.0226768	0.732335	POU5F1	6	31164337	31180731	-	2896	protein_coding	POU class 5 homeobox 1 [Source:HGNC Symbol;Acc:HGNC:9221]	Pou	0	7	0	0.123702
ENSG00000182687	5.75699	54.0789	0.0226768	0.732335	GALR2	17	76074794	76077541	+	1364	protein_coding	galanin receptor 2 [Source:HGNC Symbol;Acc:HGNC:4133]	-	7	0	0.236865	0
ENSG00000260132	-5.91316	60.2613	0.0226768	0.732335	AL032819.1	16	1408834	1412248	+	379	antisense	novel transcript, antisense to UNKL	-	0	7	0	0.945225
ENSG00000267076	-5.91316	60.2613	0.0226768	0.732335	CCDC58P3	18	12211378	12211807	+	430	processed_pseudogene	coiled-coil domain containing 58 pseudogene 3 [Source:HGNC Symbol;Acc:HGNC:45026]	-	0	7	0	0.833117
ENSG00000262165	5.75699	54.0789	0.0226768	0.732335	AC233723.1	17	4801159	4807013	-	651	protein_coding	novel protein	-	7	0	0.496289	0
ENSG00000207926	5.75699	54.0789	0.0226768	0.732335	MIR135A1	3	52294219	52294308	-	90	miRNA	microRNA 135a-1 [Source:HGNC Symbol;Acc:HGNC:31520]	-	7	0	3.58982	0
ENSG00000213621	-5.91316	60.2613	0.0226768	0.732335	RPSAP54	13	20961310	20962195	+	886	processed_pseudogene	ribosomal protein SA pseudogene 54 [Source:HGNC Symbol;Acc:HGNC:36373]	-	0	7	0	0.404334
ENSG00000275468	-5.91316	60.2613	0.0226768	0.732335	AC004678.1	19	2013728	2014656	-	929	processed_pseudogene	novel pseudogene	-	0	7	0	0.385619
ENSG00000272081	-5.91316	60.2613	0.0226768	0.732335	AC008972.2	5	72955206	72955699	-	494	lincRNA	novel transcript	-	0	7	0	0.725183
ENSG00000143110	-5.91316	60.2613	0.0226768	0.732335	C1orf162	1	111473792	111478512	+	2768	protein_coding	chromosome 1 open reading frame 162 [Source:HGNC Symbol;Acc:HGNC:28344]	-	0	7	0	0.129422
ENSG00000266962	5.75699	54.0789	0.0226768	0.732335	AC067852.2	17	42552436	42554748	-	2313	antisense	novel transcript, antisense to HSD17B1	-	7	0	0.139682	0
ENSG00000259118	-5.91316	60.2613	0.0226768	0.732335	AL139022.1	14	65082034	65094212	+	1377	antisense	uncharacterized LOC100506321 [Source:NCBI gene;Acc:100506321]	-	0	7	0	0.26016
ENSG00000232536	5.75699	54.0789	0.0226768	0.732335	AL365436.2	1	151540516	151561855	+	526	sense_intronic	novel transcript	-	7	0	0.614229	0
ENSG00000101440	-5.91316	60.2613	0.0226768	0.732335	ASIP	20	34194569	34269344	+	778	protein_coding	agouti signaling protein [Source:HGNC Symbol;Acc:HGNC:745]	-	0	7	0	0.460463
ENSG00000261286	-5.91316	60.2613	0.0226768	0.732335	ATP2C2-AS1	16	84459259	84467361	-	2998	antisense	ATP2C2 antisense RNA 1 [Source:HGNC Symbol;Acc:HGNC:53167]	-	0	7	0	0.119493
ENSG00000227006	-5.91316	60.2613	0.0226768	0.732335	AL136988.2	1	230258694	230268483	-	861	antisense	novel transcript	-	0	7	0	0.416075
ENSG00000177993	5.75699	54.0789	0.0226768	0.732335	ZNRF3-AS1	22	29024999	29031476	-	2170	antisense	ZNRF3 antisense RNA 1 [Source:HGNC Symbol;Acc:HGNC:41927]	-	7	0	0.148887	0
ENSG00000273174	-5.91316	60.2613	0.0226768	0.732335	AC108673.2	3	129123439	129124003	+	565	antisense	novel transcript, antisense to RAB43	-	0	7	0	0.634054
ENSG00000225083	5.75699	54.0789	0.0226768	0.732335	GRTP1-AS1	13	113351673	113361868	+	1177	antisense	GRTP1 antisense RNA 1 [Source:HGNC Symbol;Acc:HGNC:39917]	-	7	0	0.274498	0
ENSG00000233602	-5.91316	60.2613	0.0226768	0.732335	ERI3-IT1	1	44243408	44244273	-	619	sense_intronic	ERI3 intronic transcript 1 [Source:HGNC Symbol;Acc:HGNC:41431]	-	0	7	0	0.57874
ENSG00000223635	5.75699	54.0789	0.0226768	0.732335	AL121990.1	1	229508501	229514272	+	591	antisense	uncharacterized LOC101927478 [Source:NCBI gene;Acc:101927478]	-	7	0	0.546674	0
ENSG00000232553	-5.91316	60.2613	0.0226768	0.732335	CLK2P1	7	23585062	23586355	-	1294	processed_pseudogene	CDC like kinase 2, pseudogene 1 [Source:HGNC Symbol;Acc:HGNC:2070]	-	0	7	0	0.276847
ENSG00000189269	-5.91316	60.2613	0.0226768	0.732335	DRICH1	22	23608452	23632321	-	1302	protein_coding	aspartate rich 1 [Source:HGNC Symbol;Acc:HGNC:28031]	-	0	7	0	0.275146
ENSG00000231187	5.75699	54.0789	0.0226768	0.732335	AL356056.2	10	46582782	46598145	-	991	antisense	uncharacterized LOC101927699 [Source:NCBI gene;Acc:101927699]	-	7	0	0.326018	0
ENSG00000178015	-5.91316	60.2613	0.0226768	0.732335	GPR150	5	95620078	95622142	+	2065	protein_coding	G protein-coupled receptor 150 [Source:HGNC Symbol;Acc:HGNC:23628]	-	0	7	0	0.173482
ENSG00000235488	5.75699	54.0789	0.0226768	0.732335	JARID2-AS1	6	15247815	15248634	-	455	antisense	JARID2 antisense RNA 1 [Source:HGNC Symbol;Acc:HGNC:40314]	-	7	0	0.710075	0
ENSG00000176076	5.75699	54.0789	0.0226768	0.732335	KCNE5	X	109623700	109625172	-	1473	protein_coding	potassium voltage-gated channel subfamily E regulatory subunit 5 [Source:HGNC Symbol;Acc:HGNC:6241]	-	7	0	0.219338	0
ENSG00000260633	5.75699	54.0789	0.0226768	0.732335	AC010207.1	3	134347288	134349233	-	1946	lincRNA	novel transcript	-	7	0	0.166025	0
ENSG00000236140	-5.91316	60.2613	0.0226768	0.732335	AC245014.1	1	145286610	145287755	-	381	lincRNA	novel transcript	-	0	7	0	0.940263
ENSG00000232149	-5.91316	60.2613	0.0226768	0.732335	FERP1	X	123603139	123603931	+	793	processed_pseudogene	FER tyrosine kinase pseudogene 1 [Source:HGNC Symbol;Acc:HGNC:26443]	-	0	7	0	0.451753
ENSG00000278561	-5.91316	60.2613	0.0226768	0.732335	PTPN20CP	10	48064308	48119455	-	920	unprocessed_pseudogene	protein tyrosine phosphatase, non-receptor type 20C, pseudogene [Source:HGNC Symbol;Acc:HGNC:23424]	-	0	7	0	0.389392
ENSG00000268401	-5.91316	60.2613	0.0226768	0.732335	AC007785.3	19	46027654	46030161	+	775	lincRNA	uncharacterized LOC105372421 [Source:NCBI gene;Acc:105372421]	-	0	7	0	0.462246
ENSG00000273056	-5.91316	60.2613	0.0226768	0.732335	AL354694.1	9	7786105	7786688	-	584	lincRNA	novel transcript	-	0	7	0	0.613425
ENSG00000276445	-5.91316	60.2613	0.0226768	0.732335	AC005393.1	19	39812972	39813555	-	584	lincRNA	novel transcript	-	0	7	0	0.613425
ENSG00000269125	-5.91316	60.2613	0.0226768	0.732335	AL137002.1	13	113165002	113165183	-	182	antisense	novel transcript, antisense to PROZ	-	0	7	0	1.96835
ENSG00000276763	-5.91316	60.2613	0.0226768	0.732335	AC069499.2	3	108574683	108575064	+	382	processed_pseudogene	ribosomal protein L10 (RPL10) pseudogene	-	0	7	0	0.937802
ENSG00000272023	-5.91316	60.2613	0.0226768	0.732335	AC010240.3	5	132963770	132964164	+	395	lincRNA	novel transcript	-	0	7	0	0.906938
ENSG00000253641	5.75699	54.0789	0.0226768	0.732335	LINCR-0001	8	10474565	10481974	+	1271	lincRNA	uncharacterized LINCR-0001 [Source:NCBI gene;Acc:101929191]	-	7	0	0.254197	0
ENSG00000259244	-5.91316	60.2613	0.0226768	0.732335	AC048382.2	15	84513241	84526949	-	492	processed_transcript	novel transcript	-	0	7	0	0.728131
ENSG00000279123	5.75699	54.0789	0.0226768	0.732335	AC027281.2	16	70778433	70779145	+	713	TEC	novel transcript	-	7	0	0.453134	0
ENSG00000206815	-5.91316	60.2613	0.0226768	0.732335	RNU6-483P	3	57548838	57548945	+	108	snRNA	RNA, U6 small nuclear 483, pseudogene [Source:HGNC Symbol;Acc:HGNC:47446]	-	0	7	0	3.31704
ENSG00000229558	-5.91316	60.2613	0.0226768	0.732335	SACS-AS1	13	23418971	23428869	+	2234	lincRNA	SACS antisense RNA 1 [Source:HGNC Symbol;Acc:HGNC:39835]	-	0	7	0	0.160358
ENSG00000275409	-5.91316	60.2613	0.0226768	0.732335	AC026367.2	12	118430147	118430699	+	553	lincRNA	novel transcript	-	0	7	0	0.647813
ENSG00000272646	5.75699	54.0789	0.0226768	0.732335	AC079766.1	4	182881777	182882203	-	427	lincRNA	novel transcript	-	7	0	0.756638	0
ENSG00000279404	5.75699	54.0789	0.0226768	0.732335	AC008739.5	19	20926777	20928714	-	1938	TEC	TEC	-	7	0	0.16671	0
ENSG00000214435	-5.91316	60.2613	0.0226768	0.732335	AS3MT	10	102869516	102901899	+	2404	protein_coding	arsenite methyltransferase [Source:HGNC Symbol;Acc:HGNC:17452]	-	0	7	0	0.149018
ENSG00000234629	5.75699	54.0789	0.0226768	0.732335	WDR82P1	3	94937086	94938024	-	939	processed_pseudogene	WD repeat domain 82 pseudogene 1 [Source:HGNC Symbol;Acc:HGNC:32447]	-	7	0	0.344073	0
ENSG00000086967	-5.91316	60.2613	0.0226768	0.732335	MYBPC2	19	50432903	50466321	+	3708	protein_coding	myosin binding protein C, fast type [Source:HGNC Symbol;Acc:HGNC:7550]	-	0	7	0	0.0966128
ENSG00000264585	5.75699	54.0789	0.0226768	0.732335	MIR4449	4	52712682	52712747	+	66	miRNA	microRNA 4449 [Source:HGNC Symbol;Acc:HGNC:41864]	-	7	0	4.89522	0
ENSG00000200525	-5.91316	60.2613	0.0226768	0.732335	RNU6-1209P	8	95055214	95055320	+	107	snRNA	RNA, U6 small nuclear 1209, pseudogene [Source:HGNC Symbol;Acc:HGNC:48172]	-	0	7	0	3.34804
ENSG00000185198	-5.91316	60.2613	0.0226768	0.732335	PRSS57	19	685546	695498	-	1090	protein_coding	serine protease 57 [Source:HGNC Symbol;Acc:HGNC:31397]	-	0	7	0	0.328661
ENSG00000273897	-5.91316	60.2613	0.0226768	0.732335	AC211476.3	7	73037371	73049246	+	715	unprocessed_pseudogene	PMS2 postmeiotic segregation increased 2 (S. cerevisiae) (PMS2) pseudogene	-	0	7	0	0.501035
ENSG00000285447	-5.91316	60.2613	0.0226768	0.732335	ZNF883	9	112997120	113050043	-	2051	protein_coding	zinc finger protein 883 [Source:NCBI gene;Acc:169834]	-	0	7	0	0.174666
ENSG00000251537	-5.91316	60.2613	0.0226768	0.732335	AC005324.3	17	15571491	15651653	-	5514	protein_coding	novel tripartite motif-containing 16 (TRIM16) and CMT1A duplicated region transcript 1 (CDRT1) protein	-	0	7	0	0.0649692
ENSG00000270765	-5.91316	60.2613	0.0226768	0.732335	GAS2L2	17	35744511	35752878	-	3014	protein_coding	growth arrest specific 2 like 2 [Source:HGNC Symbol;Acc:HGNC:24846]	-	0	7	0	0.118859
ENSG00000161270	5.75699	54.0789	0.0226768	0.732335	NPHS1	19	35825964	35869287	-	5459	protein_coding	NPHS1, nephrin [Source:HGNC Symbol;Acc:HGNC:7908]	-	7	0	0.0591838	0
ENSG00000178055	5.75699	54.0789	0.0226768	0.732335	PRSS42	3	46829542	46834095	-	1857	protein_coding	serine protease 42 [Source:HGNC Symbol;Acc:HGNC:30716]	-	7	0	0.173982	0
ENSG00000238358	-5.91316	60.2613	0.0226768	0.732335	AC004969.1	7	90119299	90122890	-	578	lincRNA	novel transcript	-	0	7	0	0.619793
ENSG00000273000	-5.91316	60.2613	0.0226768	0.732335	AP000347.2	22	23652860	23717347	-	3126	processed_transcript	novel transcript	-	0	7	0	0.1146
ENSG00000103522	5.75699	54.0789	0.0226768	0.732335	IL21R	16	27402162	27452042	+	5467	protein_coding	interleukin 21 receptor [Source:HGNC Symbol;Acc:HGNC:6006]	-	7	0	0.0590972	0
ENSG00000227484	-5.91316	60.2613	0.0226768	0.732335	CR559946.1	22	50314631	50316008	+	531	antisense	novel transcript	-	0	7	0	0.674652
ENSG00000259561	5.75699	54.0789	0.0226768	0.732335	AC079075.1	15	89704665	89705415	+	449	sense_intronic	novel transcript	-	7	0	0.719564	0
ENSG00000285847	5.75699	54.0789	0.0226768	0.732335	AL713852.1	1	184635654	184664303	-	1677	lincRNA	novel transcript	-	7	0	0.192656	0
ENSG00000206914	5.75699	54.0789	0.0226768	0.732335	RF00019	12	122768099	122768200	+	102	misc_RNA		-	7	0	3.16749	0
ENSG00000250751	-5.91316	60.2613	0.0226768	0.732335	AC015795.1	17	49708334	49720060	+	575	antisense	novel transcript	-	0	7	0	0.623027
ENSG00000277352	-5.91316	60.2613	0.0226768	0.732335	AP001065.2	21	44494874	44495519	+	646	lincRNA	novel transcript	-	0	7	0	0.554552
ENSG00000266998	-5.91316	60.2613	0.0226768	0.732335	AC111182.1	17	77373818	77377236	-	3419	antisense	novel transcript, antisense to SEPT9	-	0	7	0	0.104779
ENSG00000227932	-5.91316	60.2613	0.0226768	0.732335	SELENOOLP	10	26664206	26697295	-	1390	transcribed_unitary_pseudogene	selenoprotein O like, pseudogene [Source:HGNC Symbol;Acc:HGNC:53787]	-	0	7	0	0.257727
ENSG00000253808	-5.91316	60.2613	0.0226768	0.732335	IGHVII-46-1	14	106515818	106515854	-	37	IG_V_pseudogene	immunoglobulin heavy variable (II)-46-1 (pseudogene) [Source:HGNC Symbol;Acc:HGNC:5682]	-	0	7	0	9.68217
ENSG00000260584	-5.91316	60.2613	0.0226768	0.732335	AC142381.2	16	32116700	32116997	+	298	processed_pseudogene	kinase suppressor of Ras 1 (KSR1) pseudogene	-	0	7	0	1.20215
ENSG00000230506	5.75699	54.0789	0.0226768	0.732335	AL354824.1	20	10173520	10196990	+	349	lincRNA	novel transcript	-	7	0	0.925743	0
ENSG00000277150	1.97952	3.94361	0.0230709	0.737408	F8A3	X	155456914	155458672	-	1759	protein_coding	coagulation factor VIII associated 3 [Source:HGNC Symbol;Acc:HGNC:31850]	-	18	4	0.472307	0.116378
ENSG00000155367	1.97952	3.94361	0.0230709	0.737408	PPM1J	1	112709994	112715477	-	2874	protein_coding	protein phosphatase, Mg2+/Mn2+ dependent 1J [Source:HGNC Symbol;Acc:HGNC:20785]	-	18	4	0.28907	0.0712278
ENSG00000259343	-2.12277	4.35528	0.0230709	0.737408	TMC3-AS1	15	81324377	81518200	+	7767	antisense	TMC3 antisense RNA 1 [Source:HGNC Symbol;Acc:HGNC:51424]	-	4	16	0.0237697	0.105425
ENSG00000084734	-2.12277	4.35528	0.0230709	0.737408	GCKR	2	27496842	27523684	+	3146	protein_coding	glucokinase regulator [Source:HGNC Symbol;Acc:HGNC:4196]	-	4	16	0.0586839	0.260278
ENSG00000233030	-2.12277	4.35528	0.0230709	0.737408	AC243772.2	1	149785659	149793020	-	3543	antisense	novel transcript, antisense to FCGR1A	-	4	16	0.0521083	0.231113
ENSG00000274698	-2.12277	4.35528	0.0230709	0.737408	AC099521.1	16	68450283	68452318	+	2036	lincRNA	novel transcript	-	4	16	0.0906776	0.402178
ENSG00000173338	1.97952	3.94361	0.0230709	0.737408	KCNK7	11	65592855	65595996	-	1563	protein_coding	potassium two pore domain channel subfamily K member 7 [Source:HGNC Symbol;Acc:HGNC:6282]	-	18	4	0.531534	0.130972
ENSG00000224660	-1.03795	2.05331	0.0232507	0.742205	SH3BP5-AS1	3	15254184	15264493	+	5733	antisense	SH3BP5 antisense RNA 1 [Source:HGNC Symbol;Acc:HGNC:44501]	-	94	173	0.75677	1.54433
ENSG00000167524	-1.0424	2.05965	0.0235103	0.748573	SGK494	17	28607964	28614200	-	4663	protein_coding	uncharacterized serine/threonine-protein kinase SgK494 [Source:NCBI gene;Acc:124923]	-	91	168	0.900728	1.84383
ENSG00000120322	1.23229	2.34939	0.0238961	0.75602	PCDHB8	5	141177790	141180529	+	2740	protein_coding	protocadherin beta 8 [Source:HGNC Symbol;Acc:HGNC:8693]	-	71	27	1.19598	0.504301
ENSG00000204822	-1.20129	2.29945	0.0238961	0.75602	MRPL53	2	74471958	74473322	-	1344	protein_coding	mitochondrial ribosomal protein L53 [Source:HGNC Symbol;Acc:HGNC:16684]	-	31	64	1.06458	2.43701
ENSG00000285437	-1.20129	2.29945	0.0238961	0.75602	POLR2J3	7	102562133	102572583	-	7195	protein_coding	RNA polymerase II subunit J3 [Source:HGNC Symbol;Acc:HGNC:33853]	-	31	64	0.198861	0.455225
ENSG00000188599	-1.10891	2.15682	0.024052	0.758191	NPIPP1	16	15104312	15123498	-	1437	transcribed_unprocessed_pseudogene	nuclear pore complex interacting protein pseudogene 1 [Source:HGNC Symbol;Acc:HGNC:35407]	-	46	89	1.47747	3.16964
ENSG00000161653	1.22433	2.33646	0.024056	0.758191	NAGS	17	44004546	44009063	+	2822	protein_coding	N-acetylglutamate synthase [Source:HGNC Symbol;Acc:HGNC:17996]	-	68	26	1.11217	0.471512
ENSG00000241288	-1.97883	3.94172	0.0245106	0.761643	AC092902.2	3	125827238	125916384	-	6732	processed_transcript	uncharacterized LOC101927056 [Source:NCBI gene;Acc:101927056]	-	5	18	0.0342802	0.136837
ENSG00000263155	1.81684	3.52309	0.0245106	0.761643	MYZAP	15	57591941	57685364	+	2561	protein_coding	myocardial zonula adherens protein [Source:HGNC Symbol;Acc:HGNC:43444]	-	20	5	0.360444	0.0999164
ENSG00000260578	-1.97883	3.94172	0.0245106	0.761643	AC110597.1	18	67481791	67484966	-	3176	lincRNA	novel transcript	-	5	18	0.072662	0.290047
ENSG00000255129	-1.97883	3.94172	0.0245106	0.761643	AP000880.1	11	113278437	113314437	-	958	antisense	uncharacterized LOC105369499 [Source:NCBI gene;Acc:105369499]	-	5	18	0.240892	0.961576
ENSG00000243646	-1.97883	3.94172	0.0245106	0.761643	IL10RB	21	33266358	33310187	+	4548	protein_coding	interleukin 10 receptor subunit beta [Source:HGNC Symbol;Acc:HGNC:5965]	-	5	18	0.050742	0.202548
ENSG00000243230	-1.97883	3.94172	0.0245106	0.761643	AC011005.4	7	129209775	129213545	-	535	antisense	novel transcript	-	5	18	0.431354	1.72185
ENSG00000109163	1.81684	3.52309	0.0245106	0.761643	GNRHR	4	67739328	67754360	-	2164	protein_coding	gonadotropin releasing hormone receptor [Source:HGNC Symbol;Acc:HGNC:4421]	-	20	5	0.42657	0.118247
ENSG00000279659	-1.97883	3.94172	0.0245106	0.761643	AL451064.2	6	79573877	79575530	+	1654	TEC	TEC	-	5	18	0.139525	0.556946
ENSG00000220563	-1.97883	3.94172	0.0245106	0.761643	PKMP3	6	85659892	85660606	-	715	processed_pseudogene	pyruvate kinase M1/2 pseudogene 3 [Source:HGNC Symbol;Acc:HGNC:44245]	-	5	18	0.322761	1.28838
ENSG00000256452	-1.97883	3.94172	0.0245106	0.761643	AP003170.3	11	113818077	113822458	+	158	antisense	novel transcript	-	5	18	1.4606	5.83031
ENSG00000069431	-1.03707	2.05205	0.0245202	0.761643	ABCC9	12	21797401	21942529	-	11616	protein_coding	ATP binding cassette subfamily C member 9 [Source:HGNC Symbol;Acc:HGNC:60]	-	81	149	0.321845	0.656457
ENSG00000136383	-1.20743	2.30926	0.0245632	0.761643	ALPK3	15	84816680	84873482	+	10940	protein_coding	alpha kinase 3 [Source:HGNC Symbol;Acc:HGNC:17574]	-	27	56	0.113911	0.261967
ENSG00000264577	-1.1564	2.229	0.0246936	0.764299	AC010761.1	17	28721487	28722877	-	899	antisense	novel transcript, antisense to RPL23A	-	41	82	2.10495	4.668
ENSG00000170092	-1.20925	2.31218	0.024741	0.764299	SPDYE5	7	75493625	75504304	+	3325	protein_coding	speedy/RINGO cell cycle regulator family member E5 [Source:HGNC Symbol;Acc:HGNC:35464]	-	26	54	0.36091	0.831148
ENSG00000276259	-1.26555	2.40418	0.024741	0.764299	AC009118.3	16	58522970	58523842	+	873	antisense	novel transcript, antisense to CNOT1	-	25	54	1.32173	3.1656
ENSG00000285103	-1.08734	2.12483	0.0249201	0.767055	AL451123.1	9	27529085	27543902	+	9804	antisense	novel transcript	-	53	101	0.249511	0.527223
ENSG00000210184	-1.2698	2.41128	0.0249226	0.767055	MT-TS2	MT	12207	12265	+	59	Mt_tRNA	mitochondrially encoded tRNA serine 2 (AGU/C) [Source:HGNC Symbol;Acc:HGNC:7498]	-	24	52	18.7749	45.1053
ENSG00000177738	1.15137	2.22125	0.0254355	0.775548	AC025171.1	5	43014414	43067419	-	2784	sense_overlapping	uncharacterized LOC648987 [Source:NCBI gene;Acc:648987]	-	82	33	1.35945	0.606626
ENSG00000134070	1.02892	2.0405	0.0254582	0.775548	IRAK2	3	10164865	10243743	+	3483	protein_coding	interleukin 1 receptor associated kinase 2 [Source:HGNC Symbol;Acc:HGNC:6113]	-	171	75	2.266	1.10201
ENSG00000125731	-1.87305	3.66305	0.0254753	0.775548	SH2D3A	19	6752160	6767588	-	5716	protein_coding	SH2 domain containing 3A [Source:HGNC Symbol;Acc:HGNC:16885]	-	6	20	0.0484481	0.179066
ENSG00000261101	-1.87305	3.66305	0.0254753	0.775548	AC234775.3	X	101627868	101628523	+	656	sense_overlapping	novel transcript, overlapping to ARMCX3	-	6	20	0.422148	1.56028
ENSG00000183444	-1.87305	3.66305	0.0254753	0.775548	OR7E38P	7	97966090	97967074	-	985	unprocessed_pseudogene	olfactory receptor family 7 subfamily E member 38 pseudogene [Source:HGNC Symbol;Acc:HGNC:8411]	-	6	20	0.281147	1.03913
ENSG00000259349	-1.87305	3.66305	0.0254753	0.775548	AC011921.1	17	60526293	60550798	+	718	antisense	novel transcript, antisense to APPBP2	-	6	20	0.385695	1.42555
ENSG00000082126	1.28827	2.44235	0.0254851	0.775548	MPP4	2	201644870	201698694	-	4924	protein_coding	membrane palmitoylated protein 4 [Source:HGNC Symbol;Acc:HGNC:13680]	-	52	19	0.48742	0.197475
ENSG00000204177	-1.01172	2.01632	0.0256147	0.775548	BMS1P1	10	46786674	46811989	+	4561	transcribed_unprocessed_pseudogene	BMS1, ribosome biogenesis factor pseudogene 1 [Source:HGNC Symbol;Acc:HGNC:23649]	-	114	206	1.15362	2.31145
ENSG00000177990	-1.15604	2.22845	0.0256392	0.775548	DPY19L2	12	63558913	63668939	-	5646	protein_coding	dpy-19 like 2 [Source:HGNC Symbol;Acc:HGNC:19414]	-	36	72	0.294293	0.652632
ENSG00000254614	1.28027	2.42885	0.0256753	0.775548	AP003068.2	11	65177606	65181834	-	1791	antisense	uncharacterized LOC728975 [Source:NCBI gene;Acc:728975]	-	49	18	1.26275	0.514344
ENSG00000205534	-1.08196	2.11692	0.0257589	0.775548	SMG1P2	16	29527568	29594966	-	4221	unprocessed_pseudogene	SMG1 pseudogene 2 [Source:HGNC Symbol;Acc:HGNC:49859]	-	59	112	0.645141	1.35794
ENSG00000170545	1.06533	2.09264	0.0258266	0.775548	SMAGP	12	51244558	51270890	-	3558	protein_coding	small cell adhesion glycoprotein [Source:HGNC Symbol;Acc:HGNC:26918]	-	145	62	1.88096	0.891789
ENSG00000088340	-1.05063	2.07144	0.0258266	0.775548	FER1L4	20	35558737	35607562	-	9067	transcribed_unitary_pseudogene	fer-1 like family member 4, pseudogene [Source:HGNC Symbol;Acc:HGNC:15801]	-	70	130	0.35633	0.733764
ENSG00000279744	-1.33127	2.51624	0.0258645	0.775548	AC132938.5	17	82462601	82464255	+	1655	TEC	TEC	-	19	43	0.529875	1.32968
ENSG00000197599	-1.3402	2.53186	0.0260503	0.775548	CCDC154	16	1434383	1444556	-	2726	protein_coding	coiled-coil domain containing 154 [Source:HGNC Symbol;Acc:HGNC:34454]	-	18	41	0.304765	0.769723
ENSG00000267395	1.32651	2.50795	0.0260503	0.775548	DM1-AS	19	45767796	45772504	+	1027	antisense	DM1 locus antisense RNA [Source:HGNC Symbol;Acc:HGNC:53125]	-	45	16	2.02237	0.797308
ENSG00000204099	-1.79183	3.46253	0.0261053	0.775548	NEU4	2	241808825	241817413	+	4689	protein_coding	neuraminidase 4 [Source:HGNC Symbol;Acc:HGNC:21328]	-	7	22	0.0689026	0.240115
ENSG00000274220	-1.60252	3.03673	0.0261053	0.775548	AC009163.6	16	75433836	75436392	+	2557	lincRNA	novel transcript	-	8	22	0.144403	0.44032
ENSG00000149609	-1.60252	3.03673	0.0261053	0.775548	C20orf144	20	33662284	33665619	+	2442	protein_coding	chromosome 20 open reading frame 144 [Source:HGNC Symbol;Acc:HGNC:16137]	-	8	22	0.151204	0.461056
ENSG00000243829	-1.79183	3.46253	0.0261053	0.775548	AC011495.1	19	49719498	49720081	-	584	processed_pseudogene	ribosomal protein S9 (RPS9) pseudogene	-	7	22	0.553226	1.92791
ENSG00000226352	-1.79183	3.46253	0.0261053	0.775548	PSPC1-AS2	13	19674624	19675884	+	376	antisense	PSPC1 antisense RNA 2 [Source:HGNC Symbol;Acc:HGNC:52951]	-	7	22	0.859267	2.99441
ENSG00000185291	-1.60252	3.03673	0.0261053	0.775548	IL3RA	X	1336616	1382689	+	1710	protein_coding	interleukin 3 receptor subunit alpha [Source:HGNC Symbol;Acc:HGNC:6012]	-	8	22	0.215929	0.65842
ENSG00000261020	-1.60252	3.03673	0.0261053	0.775548	AC132825.3	17	22420022	22424731	+	4710	lincRNA	novel transcript	-	8	22	0.0783947	0.239044
ENSG00000225313	-1.15578	2.22804	0.0263	0.775548	AL513327.1	1	33307348	33349245	+	4015	antisense	novel transcript	-	33	66	0.379355	0.841269
ENSG00000074966	1.38376	2.60947	0.0263988	0.775548	TXK	4	48066393	48134256	-	3472	protein_coding	TXK tyrosine kinase [Source:HGNC Symbol;Acc:HGNC:12434]	-	41	14	0.545032	0.20636
ENSG00000273173	-1.56009	2.94871	0.0264977	0.775548	SNURF	15	24954986	24977850	+	1175	protein_coding	SNRPN upstream reading frame [Source:HGNC Symbol;Acc:HGNC:11171]	-	9	24	0.353527	1.04532
ENSG00000214711	-1.56009	2.94871	0.0264977	0.775548	CAPN14	2	31173056	31233858	-	4014	protein_coding	calpain 14 [Source:HGNC Symbol;Acc:HGNC:16664]	-	9	24	0.103486	0.305992
ENSG00000263826	-1.17801	2.26264	0.0265384	0.775548	AC112907.3	3	186781780	186784179	-	2400	antisense	novel transcript, antisense to eukaryotic translation initiation factor 4A, isoform 2 EIF4A2	-	32	65	0.615399	1.38605
ENSG00000111816	-1.37358	2.59112	0.0265521	0.775548	FRK	6	115931149	116060758	-	13230	protein_coding	fyn related Src family tyrosine kinase [Source:HGNC Symbol;Acc:HGNC:3955]	-	15	35	0.0523298	0.135389
ENSG00000169184	-1.37358	2.59112	0.0265521	0.775548	MN1	22	27748277	27801498	-	7693	protein_coding	MN1 proto-oncogene, transcriptional regulator [Source:HGNC Symbol;Acc:HGNC:7180]	-	15	35	0.0899939	0.232835
ENSG00000281026	-1.5251	2.87807	0.02672	0.775548	N4BP2L2-IT2	13	32504506	32509395	-	4890	sense_intronic	N4BPL2 intronic transcript 2 [Source:HGNC Symbol;Acc:HGNC:25038]	-	10	26	0.0943863	0.272108
ENSG00000224950	-1.5251	2.87807	0.02672	0.775548	AL390066.1	1	116493016	116499212	-	2302	lincRNA	novel transcript	-	10	26	0.200499	0.578022
ENSG00000108551	1.50092	2.83022	0.02678	0.775548	RASD1	17	17494437	17496395	-	1748	protein_coding	ras related dexamethasone induced 1 [Source:HGNC Symbol;Acc:HGNC:15828]	-	35	11	0.924154	0.322053
ENSG00000197249	1.61263	3.05809	0.0268201	0.775548	SERPINA1	14	94376747	94390693	-	4902	protein_coding	serpin family A member 1 [Source:HGNC Symbol;Acc:HGNC:8941]	-	31	9	0.291881	0.0939606
ENSG00000237424	1.56553	2.95986	0.0268201	0.775548	FOXD2-AS1	1	47432133	47434641	-	2509	lincRNA	FOXD2 adjacent opposite strand RNA 1 [Source:HGNC Symbol;Acc:HGNC:44256]	-	30	9	0.551872	0.183577
ENSG00000109193	-1.49576	2.82012	0.0268201	0.775548	SULT1E1	4	69841212	69860152	-	2091	protein_coding	sulfotransferase family 1E member 1 [Source:HGNC Symbol;Acc:HGNC:11377]	-	11	28	0.242804	0.6853
ENSG00000132000	-1.49576	2.82012	0.0268201	0.775548	PODNL1	19	13931187	13953392	-	4168	protein_coding	podocan like 1 [Source:HGNC Symbol;Acc:HGNC:26275]	-	11	28	0.12181	0.343801
ENSG00000264268	1.55233	2.9329	0.0268319	0.775548	MIR4767	X	7147860	7147937	+	78	miRNA	microRNA 4767 [Source:HGNC Symbol;Acc:HGNC:41548]	-	33	10	19.5271	6.56118
ENSG00000147065	1.00524	2.00728	0.0269721	0.775548	MSN	X	65588377	65741931	+	5971	protein_coding	moesin [Source:HGNC Symbol;Acc:HGNC:7373]	-	222	99	1.71603	0.848525
ENSG00000151025	-2.54167	5.82262	0.0270427	0.775548	GPR158	10	25174802	25602226	+	7986	protein_coding	G protein-coupled receptor 158 [Source:HGNC Symbol;Acc:HGNC:23689]	-	2	11	0.011559	0.070492
ENSG00000183793	-2.54167	5.82262	0.0270427	0.775548	NPIPA5	16	15363624	15381047	-	1520	protein_coding	nuclear pore complex interacting protein family member A5 [Source:HGNC Symbol;Acc:HGNC:41980]	-	2	11	0.0607301	0.370361
ENSG00000157703	2.47326	5.55299	0.0270427	0.775548	SVOPL	7	138594285	138701352	-	6302	protein_coding	SVOP like [Source:HGNC Symbol;Acc:HGNC:27034]	-	13	2	0.09521	0.0162416
ENSG00000189431	2.47326	5.55299	0.0270427	0.775548	RASSF10	11	13009577	13012106	+	2530	protein_coding	Ras association domain family member 10 [Source:HGNC Symbol;Acc:HGNC:33984]	-	13	2	0.23716	0.0404563
ENSG00000254909	-2.54167	5.82262	0.0270427	0.775548	AP003392.2	11	119005727	119005934	-	208	processed_pseudogene	potassium channel tetramerisation domain containing 6 (KCTD6) pseudogene	-	2	11	0.443797	2.70649
ENSG00000277342	-2.54167	5.82262	0.0270427	0.775548	AC048344.4	12	32109076	32109602	+	527	sense_intronic	novel transcript, sense intronic to BICD1	-	2	11	0.175161	1.06821
ENSG00000261118	-2.54167	5.82262	0.0270427	0.775548	AC092123.1	16	89492017	89504460	-	1045	antisense	uncharacterized LOC101927863 [Source:NCBI gene;Acc:101927863]	-	2	11	0.0883347	0.538707
ENSG00000272720	-2.54167	5.82262	0.0270427	0.775548	AL022322.1	22	38090127	38091559	+	1433	lincRNA	novel transcript, antisense to BAIAP2L2	-	2	11	0.0644172	0.392847
ENSG00000017483	-2.54167	5.82262	0.0270427	0.775548	SLC38A5	X	48458537	48470256	-	4014	protein_coding	solute carrier family 38 member 5 [Source:HGNC Symbol;Acc:HGNC:18070]	-	2	11	0.022997	0.140246
ENSG00000257283	-2.54167	5.82262	0.0270427	0.775548	AC012464.1	12	93894965	93943603	-	540	antisense	uncharacterized LOC105369911 [Source:NCBI gene;Acc:105369911]	-	2	11	0.170944	1.0425
ENSG00000276649	-2.54167	5.82262	0.0270427	0.775548	AL117335.1	20	1888128	1894374	-	1607	antisense	uncharacterized LOC102724545 [Source:NCBI gene;Acc:102724545]	-	2	11	0.0574423	0.350311
ENSG00000227666	-2.54167	5.82262	0.0270427	0.775548	CYCSP24	9	94038030	94038345	+	316	processed_pseudogene	cytochrome c, somatic pseudogene 24 [Source:HGNC Symbol;Acc:HGNC:24398]	-	2	11	0.29212	1.78148
ENSG00000259657	-2.54167	5.82262	0.0270427	0.775548	PIGHP1	15	59676757	59677321	+	565	processed_pseudogene	phosphatidylinositol glycan anchor biosynthesis class H pseudogene 1 [Source:HGNC Symbol;Acc:HGNC:45152]	-	2	11	0.16338	0.99637
ENSG00000277504	-2.54167	5.82262	0.0270427	0.775548	AC010536.3	16	87683945	87684477	-	533	antisense	novel transcript, antisense to JPH3	-	2	11	0.173189	1.05619
ENSG00000284879	-2.54167	5.82262	0.0270427	0.775548	AC133644.3	2	87455476	87767359	+	3849	processed_transcript	novel transcript	-	2	11	0.0239828	0.146259
ENSG00000185523	-2.54167	5.82262	0.0270427	0.775548	SPATA45	1	212830141	212847649	-	506	protein_coding	spermatogenesis associated 45 [Source:HGNC Symbol;Acc:HGNC:33709]	-	2	11	0.18243	1.11255
ENSG00000254003	-2.54167	5.82262	0.0270427	0.775548	AC003991.2	7	88216660	88219226	+	576	antisense	novel transcript	-	2	11	0.16026	0.977342
ENSG00000226937	2.47326	5.55299	0.0270427	0.775548	CEP164P1	10	45002222	45076066	-	4357	transcribed_processed_pseudogene	centrosomal protein 164 pseudogene 1 [Source:HGNC Symbol;Acc:HGNC:44988]	-	13	2	0.137713	0.0234919
ENSG00000015592	1.09687	2.13891	0.0270674	0.775548	STMN4	8	27235323	27258420	-	3294	protein_coding	stathmin 4 [Source:HGNC Symbol;Acc:HGNC:16078]	-	110	46	1.5413	0.714678
ENSG00000175701	-1.00762	2.01059	0.0276511	0.789546	MTLN	2	110211529	110245420	-	2051	protein_coding	mitoregulin [Source:HGNC Symbol;Acc:HGNC:27339]	-	96	173	2.16035	4.31675
ENSG00000185304	-1.06744	2.09571	0.0277883	0.792555	RGPD2	2	87755955	87825952	-	7023	protein_coding	RANBP2-like and GRIP domain containing 2 [Source:HGNC Symbol;Acc:HGNC:32415]	-	58	109	0.381174	0.794292
ENSG00000250979	-1.06407	2.09082	0.028228	0.801423	AC022905.1	8	72202751	72251565	-	3048	unprocessed_pseudogene	transient receptor potential cation channel subfamily A member 1 pseudogene [Source:NCBI gene;Acc:392232]	-	56	105	0.84799	1.76299
ENSG00000106133	-1.06229	2.08825	0.0284598	0.807084	NSUN5P2	7	72947581	72954790	-	2576	transcribed_unprocessed_pseudogene	NOP2/Sun RNA methyltransferase family member 5 pseudogene 2 [Source:HGNC Symbol;Acc:HGNC:16609]	-	55	103	0.98545	2.04629
ENSG00000188277	-1.13524	2.19654	0.0286753	0.811349	C15orf62	15	40770080	40772449	+	2370	protein_coding	chromosome 15 open reading frame 62 [Source:HGNC Symbol;Acc:HGNC:34489]	-	35	69	0.681612	1.48997
ENSG00000037965	1.04335	2.06101	0.0288173	0.814441	HOXC8	12	54009106	54012362	+	1889	protein_coding	homeobox C8 [Source:HGNC Symbol;Acc:HGNC:5129]	Homeobox	129	56	3.15192	1.51716
ENSG00000120332	1.24213	2.36547	0.0291851	0.822966	TNN	1	175067858	175148066	+	5008	protein_coding	tenascin N [Source:HGNC Symbol;Acc:HGNC:22942]	-	53	20	0.48846	0.204382
ENSG00000152672	-1.28487	2.43659	0.0295429	0.831173	CLEC4F	2	70808643	70820600	-	2475	protein_coding	C-type lectin domain family 4 member F [Source:HGNC Symbol;Acc:HGNC:25357]	-	21	46	0.391617	0.951172
ENSG00000259429	-1.0039	2.00542	0.0296656	0.833682	UBE2Q2P2	15	82355142	82420075	+	1855	transcribed_unprocessed_pseudogene	ubiquitin conjugating enzyme E2 Q2 pseudogene 2 [Source:HGNC Symbol;Acc:HGNC:37440]	-	84	151	2.09003	4.16591
ENSG00000175697	1.04581	2.06452	0.0297807	0.835954	GPR156	3	120164645	120285094	-	6058	protein_coding	G protein-coupled receptor 156 [Source:HGNC Symbol;Acc:HGNC:20844]	-	120	52	0.91426	0.439289
ENSG00000181085	-1.00193	2.00268	0.0298639	0.835954	MAPK15	8	143716259	143722458	+	3056	protein_coding	mitogen-activated protein kinase 15 [Source:HGNC Symbol;Acc:HGNC:24667]	-	83	149	1.25355	2.49522
ENSG00000112769	1.25061	2.37942	0.0299142	0.835954	LAMA4	6	112108760	112254939	-	11575	protein_coding	laminin subunit alpha 4 [Source:HGNC Symbol;Acc:HGNC:6484]	-	48	18	0.191398	0.0795844
ENSG00000187013	1.27129	2.41377	0.0302988	0.835968	C17orf82	17	61411751	61413280	+	1530	lincRNA	chromosome 17 open reading frame 82 [Source:HGNC Symbol;Acc:HGNC:32699]	-	46	17	1.38766	0.568635
ENSG00000203506	-1.29741	2.45788	0.0302988	0.835968	RBMS3-AS2	3	29526251	29642809	-	2303	antisense	RBMS3 antisense RNA 2 [Source:HGNC Symbol;Acc:HGNC:39988]	-	19	42	0.380783	0.933323
ENSG00000267277	-2.22541	4.67645	0.0303481	0.835968	AC024575.1	19	11368123	11374935	-	682	antisense	novel transcript, antisense to SWSAP1	-	3	13	0.203027	0.975518
ENSG00000185332	2.11989	4.34661	0.0303481	0.835968	TMEM105	17	81311270	81330674	-	3794	protein_coding	transmembrane protein 105 [Source:HGNC Symbol;Acc:HGNC:26794]	-	15	3	0.182478	0.0404669
ENSG00000230358	-2.22541	4.67645	0.0303481	0.835968	SPDYE21P	7	67279778	67286230	+	827	unprocessed_pseudogene	speedy/RINGO cell cycle regulator family member E21, pseudogene [Source:HGNC Symbol;Acc:HGNC:51517]	-	3	13	0.16743	0.804478
ENSG00000207721	-2.22541	4.67645	0.0303481	0.835968	MIR186	1	71067631	71067716	-	86	miRNA	microRNA 186 [Source:HGNC Symbol;Acc:HGNC:31557]	-	3	13	1.61005	7.73609
ENSG00000230371	2.11989	4.34661	0.0303481	0.835968	KARSP2	13	113130416	113132054	+	1639	processed_pseudogene	lysyl-tRNA synthetase pseudogene 2 [Source:HGNC Symbol;Acc:HGNC:39208]	-	15	3	0.422406	0.0936739
ENSG00000259515	-2.22541	4.67645	0.0303481	0.835968	AL117209.1	14	102933574	102937177	+	828	antisense	novel transcript, antisense to CDC42BPB	-	3	13	0.167228	0.803507
ENSG00000232070	2.11989	4.34661	0.0303481	0.835968	TMEM253	14	21098937	21103724	+	1961	protein_coding	transmembrane protein 253 [Source:HGNC Symbol;Acc:HGNC:32545]	-	15	3	0.353046	0.0782925
ENSG00000267724	-2.22541	4.67645	0.0303481	0.835968	AC012254.3	18	47105946	47108062	+	2117	antisense	novel transcript, antisense to HDHD2	-	3	13	0.0654061	0.314267
ENSG00000230805	-2.22541	4.67645	0.0303481	0.835968	AL132709.1	14	101073869	101077910	-	1283	lincRNA	novel transcript	-	3	13	0.107923	0.518553
ENSG00000267169	-1.06378	2.0904	0.0303512	0.835968	AC022098.1	19	14137179	14171267	+	3186	antisense	uncharacterized LOC100507373 [Source:NCBI gene;Acc:100507373]	-	48	90	0.695366	1.44568
ENSG00000237989	-1.30468	2.47029	0.0306957	0.844523	LINC01679	21	43358147	43362349	-	2798	lincRNA	long intergenic non-protein coding RNA 1679 [Source:HGNC Symbol;Acc:HGNC:52469]	-	18	40	0.296922	0.731625
ENSG00000144596	-1.15534	2.22737	0.030798	0.845742	GRIP2	3	14489111	14556075	-	11885	protein_coding	glutamate receptor interacting protein 2 [Source:HGNC Symbol;Acc:HGNC:23841]	-	29	58	0.11262	0.24975
ENSG00000079819	1.31968	2.49611	0.0311037	0.845742	EPB41L2	6	130839347	131063322	-	10320	protein_coding	erythrocyte membrane protein band 4.1 like 2 [Source:HGNC Symbol;Acc:HGNC:3379]	-	42	15	0.18784	0.0743855
ENSG00000175505	1.06593	2.09351	0.0311985	0.845742	CLCF1	11	67364168	67374177	-	1975	protein_coding	cardiotrophin like cytokine factor 1 [Source:HGNC Symbol;Acc:HGNC:17412]	-	110	47	2.57065	1.21789
ENSG00000283103	-1.05852	2.0828	0.0311985	0.845742	AC010642.2	19	58310449	58326933	-	2413	antisense	novel transcript, antisense to ERVK3-1	-	53	99	1.01376	2.09969
ENSG00000135437	-1.32176	2.49971	0.0315204	0.845742	RDH5	12	55720367	55724705	+	2983	protein_coding	retinol dehydrogenase 5 [Source:HGNC Symbol;Acc:HGNC:9940]	-	16	36	0.247562	0.617626
ENSG00000272918	-1.3319	2.51734	0.0319423	0.845742	AC005070.3	7	105102838	105105483	-	2646	antisense	novel transcript, antisense to MLL5	-	15	34	0.261649	0.657606
ENSG00000280046	-1.15493	2.22673	0.0321187	0.845742	AC104581.4	17	7858943	7866083	+	7141	TEC	TEC	-	26	52	0.168048	0.372667
ENSG00000153064	-2.03036	4.08507	0.0322922	0.845742	BANK1	4	101411286	102074812	+	6144	protein_coding	B cell scaffold protein with ankyrin repeats 1 [Source:HGNC Symbol;Acc:HGNC:18233]	-	4	15	0.0300488	0.124944
ENSG00000219607	-2.03036	4.08507	0.0322922	0.845742	PPP1R3G	6	5084581	5089487	+	4907	protein_coding	protein phosphatase 1 regulatory subunit 3G [Source:HGNC Symbol;Acc:HGNC:14945]	-	4	15	0.0376237	0.156441
ENSG00000243176	1.89767	3.72612	0.0322922	0.845742	AC092944.1	3	157175223	157381265	+	1544	processed_transcript	novel transcript	-	17	4	0.508182	0.132583
ENSG00000263235	-2.03036	4.08507	0.0322922	0.845742	AC006111.2	16	3650636	3651703	-	1068	sense_overlapping	novel transcript, sense overlapping TRAP1	-	4	15	0.172865	0.718781
ENSG00000142233	-2.03036	4.08507	0.0322922	0.845742	NTN5	19	48661407	48673081	-	3115	protein_coding	netrin 5 [Source:HGNC Symbol;Acc:HGNC:25208]	-	4	15	0.0592679	0.246439
ENSG00000239912	1.89767	3.72612	0.0322922	0.845742	RPL39P36	19	53413190	53413345	+	156	processed_pseudogene	ribosomal protein L39 pseudogene 36 [Source:HGNC Symbol;Acc:HGNC:36076]	-	17	4	5.0297	1.31224
ENSG00000230333	-2.03036	4.08507	0.0322922	0.845742	AC004160.1	7	11180902	11520175	+	5660	processed_transcript	novel transcript, antisense to THSD7A	-	4	15	0.0326183	0.135629
ENSG00000124134	1.89767	3.72612	0.0322922	0.845742	KCNS1	20	45092310	45101112	-	4538	protein_coding	potassium voltage-gated channel modifier subfamily S member 1 [Source:HGNC Symbol;Acc:HGNC:6300]	-	17	4	0.172903	0.0451099
ENSG00000055955	-2.03036	4.08507	0.0322922	0.845742	ITIH4	3	52812975	52831479	-	5462	protein_coding	inter-alpha-trypsin inhibitor heavy chain family member 4 [Source:HGNC Symbol;Acc:HGNC:6169]	-	4	15	0.0338007	0.140545
ENSG00000261559	1.89767	3.72612	0.0322922	0.845742	FSCN1P1	15	34494420	34495900	+	1481	processed_pseudogene	fascin actin-bundling protein 1 pseudogene 1 [Source:HGNC Symbol;Acc:HGNC:49669]	-	17	4	0.5298	0.138223
ENSG00000259218	-2.03036	4.08507	0.0322922	0.845742	LINC00928	15	89505277	89524034	-	1487	lincRNA	long intergenic non-protein coding RNA 928 [Source:HGNC Symbol;Acc:HGNC:27535]	-	4	15	0.124156	0.516246
ENSG00000261794	-1.35651	2.56065	0.0327785	0.845742	GOLGA8H	15	30604126	30614561	+	1899	protein_coding	golgin A8 family member H [Source:HGNC Symbol;Acc:HGNC:37443]	-	13	30	0.315963	0.808486
ENSG00000260750	-1.133	2.19315	0.0331458	0.845742	AC092720.1	16	87492555	87515635	+	1356	lincRNA	uncharacterized LOC101928737 [Source:NCBI gene;Acc:101928737]	-	32	63	1.0892	2.3777
ENSG00000129910	-1.42207	2.67969	0.0331737	0.845742	CDH15	16	89171767	89195492	+	4628	protein_coding	cadherin 15 [Source:HGNC Symbol;Acc:HGNC:1754]	-	12	29	0.119676	0.320687
ENSG00000221916	-1.42207	2.67969	0.0331737	0.845742	C19orf73	19	49118397	49119140	-	744	protein_coding	chromosome 19 open reading frame 73 [Source:HGNC Symbol;Acc:HGNC:25534]	-	12	29	0.744434	1.99481
ENSG00000182450	1.50811	2.84437	0.0331737	0.845742	KCNK4	11	64291302	64300031	+	2632	protein_coding	potassium two pore domain channel subfamily K member 4 [Source:HGNC Symbol;Acc:HGNC:6279]	-	32	10	0.561154	0.194442
ENSG00000125879	-1.42207	2.67969	0.0331737	0.845742	OTOR	20	16748358	16770062	+	2198	protein_coding	otoraplin [Source:HGNC Symbol;Acc:HGNC:8517]	-	12	29	0.251983	0.675222
ENSG00000112183	1.04867	2.06862	0.0332507	0.845742	RBM24	6	17281346	17293875	+	3444	protein_coding	RNA binding motif protein 24 [Source:HGNC Symbol;Acc:HGNC:21539]	-	111	48	1.48757	0.713271
ENSG00000179477	1.74334	3.34809	0.0333763	0.845742	ALOX12B	17	8072636	8087716	-	2746	protein_coding	arachidonate 12-lipoxygenase, 12R type [Source:HGNC Symbol;Acc:HGNC:430]	-	19	5	0.319353	0.093185
ENSG00000208772	-1.89692	3.72417	0.0333763	0.845742	SNORD94	2	86135870	86136006	+	137	snoRNA	small nucleolar RNA, C/D box 94 [Source:HGNC Symbol;Acc:HGNC:32756]	-	5	17	1.68449	6.35045
ENSG00000272979	1.74334	3.34809	0.0333763	0.845742	AC093388.1	2	190454092	190454521	-	430	antisense	novel transcript, antisense to MFSD6	-	19	5	2.0394	0.595084
ENSG00000227076	1.74334	3.34809	0.0333763	0.845742	AL158166.1	10	127934698	127936167	+	371	sense_intronic	novel transcript	-	19	5	2.36373	0.68972
ENSG00000242516	-1.44351	2.71982	0.0335331	0.845742	LINC00960	3	75672391	75679303	+	3181	lincRNA	long intergenic non-protein coding RNA 960 [Source:HGNC Symbol;Acc:HGNC:48710]	-	11	27	0.159605	0.434387
ENSG00000285763	-1.44351	2.71982	0.0335331	0.845742	AL358777.1	6	10659498	10692860	+	3467	antisense	novel transcript, antisense to C6orf52	-	11	27	0.146439	0.398553
ENSG00000213973	-1.44351	2.71982	0.0335331	0.845742	ZNF99	19	22752183	22784107	-	7883	protein_coding	zinc finger protein 99 [Source:HGNC Symbol;Acc:HGNC:13175]	zf-C2H2	11	27	0.0644049	0.175287
ENSG00000204790	-1.46878	2.76788	0.0338323	0.845742	AL163540.1	9	63974762	64004155	-	386	unprocessed_pseudogene	COBW domain containing protein pseudogene	-	10	25	1.19572	3.31459
ENSG00000258315	-1.46878	2.76788	0.0338323	0.845742	C17orf49	17	7014495	7017525	+	2628	protein_coding	chromosome 17 open reading frame 49 [Source:HGNC Symbol;Acc:HGNC:28737]	-	10	25	0.175627	0.486845
ENSG00000205702	-1.46878	2.76788	0.0338323	0.845742	CYP2D7	22	42140203	42144577	-	2260	polymorphic_pseudogene	cytochrome P450 family 2 subfamily D member 7 (gene/pseudogene) [Source:HGNC Symbol;Acc:HGNC:2624]	-	10	25	0.204225	0.566119
ENSG00000267710	-1.46878	2.76788	0.0338323	0.845742	EDDM13	19	56272769	56310450	+	2326	protein_coding	epididymal protein 13 [Source:HGNC Symbol;Acc:HGNC:53168]	-	10	25	0.19843	0.550056
ENSG00000227632	1.58182	2.99347	0.0338323	0.845742	AC018804.1	2	130202312	130212628	+	618	unprocessed_pseudogene	pseudogene similar to part of CDC42 binding protein kinase beta (DMPK-like) CDC42BPB	-	27	8	2.01648	0.662488
ENSG00000265778	-1.46878	2.76788	0.0338323	0.845742	AC018413.1	18	76491652	76493918	+	1393	antisense	uncharacterized LOC101927989 [Source:NCBI gene;Acc:101927989]	-	10	25	0.331334	0.918471
ENSG00000237451	-1.79949	3.48098	0.0339102	0.845742	CDK2AP2P2	9	62844818	62845184	+	367	processed_pseudogene	cyclin dependent kinase 2 associated protein 2 pseudogene 2 [Source:HGNC Symbol;Acc:HGNC:38493]	-	6	19	0.754576	2.6495
ENSG00000175899	1.05703	2.08064	0.0340029	0.845742	A2M	12	9067664	9116229	-	6384	protein_coding	alpha-2-macroglobulin [Source:HGNC Symbol;Acc:HGNC:7]	-	107	46	0.773586	0.368758
ENSG00000163377	1.661	3.16235	0.0340354	0.845742	FAM19A4	3	68731766	68953297	-	3297	protein_coding	family with sequence similarity 19 member A4, C-C motif chemokine like [Source:HGNC Symbol;Acc:HGNC:21591]	-	25	7	0.349976	0.108656
ENSG00000237039	-1.49899	2.82645	0.0340354	0.845742	AC018738.1	2	231256097	231256306	+	210	processed_pseudogene	ribosomal protein S28 (RPS28) pseudogene	-	9	23	1.97807	5.60512
ENSG00000226268	1.661	3.16235	0.0340354	0.845742	AC135977.1	11	49433480	49434438	-	959	processed_pseudogene	solute carrier family 25, member 33 (SLC25A33) pseudogene	-	25	7	1.2032	0.373556
ENSG00000279605	1.661	3.16235	0.0340354	0.845742	AC067930.6	8	143578358	143583304	+	4947	TEC	TEC	-	25	7	0.233247	0.0724157
ENSG00000267632	-1.49899	2.82645	0.0340354	0.845742	AC067852.3	17	42509784	42511519	+	1736	sense_intronic	novel transcript	-	9	23	0.239282	0.678039
ENSG00000285579	-1.49899	2.82645	0.0340354	0.845742	AC015687.1	8	70669369	71228629	+	2597	processed_transcript	novel transcript	-	9	23	0.159951	0.453244
ENSG00000105672	-1.53577	2.89944	0.0340884	0.845742	ETV2	19	35641745	35644871	+	2152	protein_coding	ETS variant 2 [Source:HGNC Symbol;Acc:HGNC:3491]	ETS	8	21	0.17158	0.499406
ENSG00000227953	-1.53577	2.89944	0.0340884	0.845742	LINC01341	1	246776013	246792385	+	3984	processed_transcript	long intergenic non-protein coding RNA 1341 [Source:HGNC Symbol;Acc:HGNC:49457]	-	8	21	0.0926805	0.269759
ENSG00000105880	1.20277	2.30181	0.0342372	0.845742	DLX5	7	97020392	97024950	-	1748	protein_coding	distal-less homeobox 5 [Source:HGNC Symbol;Acc:HGNC:2918]	Homeobox	49	19	1.29382	0.556274
ENSG00000263513	-1.0392	2.05509	0.0344029	0.845742	FAM72C	1	143955364	143971965	-	2297	protein_coding	family with sequence similarity 72 member C [Source:HGNC Symbol;Acc:HGNC:30602]	-	51	94	1.02477	2.09432
ENSG00000271335	-1.25776	2.39125	0.0348426	0.845742	AL117336.3	10	35314552	35336401	-	1412	antisense	novel transcript, antisense to CCNY	-	20	43	0.653752	1.55851
ENSG00000213397	-1.25776	2.39125	0.0348426	0.845742	HAUS7	X	153447666	153495516	-	3968	protein_coding	HAUS augmin like complex subunit 7 [Source:HGNC Symbol;Acc:HGNC:32979]	-	20	43	0.232636	0.554592
ENSG00000272644	1.22032	2.32998	0.0348426	0.845742	AC097468.3	2	219069354	219069809	-	456	lincRNA	novel transcript	-	47	18	4.75719	2.02015
ENSG00000146233	2.87088	7.31513	0.0348666	0.845742	CYP39A1	6	46549580	46652830	-	3111	protein_coding	cytochrome P450 family 39 subfamily A member 1 [Source:HGNC Symbol;Acc:HGNC:17449]	-	9	1	0.133524	0.0164504
ENSG00000224094	-3.16897	8.99404	0.0348666	0.845742	RPS24P8	3	45159774	45160175	-	402	processed_pseudogene	ribosomal protein S24 pseudogene 8 [Source:HGNC Symbol;Acc:HGNC:37016]	-	1	9	0.114813	1.14576
ENSG00000279377	-3.16897	8.99404	0.0348666	0.845742	AC003973.3	19	21965708	21968529	-	2822	TEC	TEC	-	1	9	0.0163554	0.163216
ENSG00000181908	2.87088	7.31513	0.0348666	0.845742	AP003774.1	11	64449074	64451657	+	2340	lincRNA	uncharacterized LOC100996455 [Source:NCBI gene;Acc:100996455]	-	9	1	0.177519	0.0218706
ENSG00000232803	-3.16897	8.99404	0.0348666	0.845742	SLCO4A1-AS1	20	62663019	62666724	-	1534	antisense	SLCO4A1 antisense RNA 1 [Source:HGNC Symbol;Acc:HGNC:40537]	-	1	9	0.0300879	0.300257
ENSG00000175189	2.87088	7.31513	0.0348666	0.845742	INHBC	12	57434760	57450828	+	1992	protein_coding	inhibin subunit beta C [Source:HGNC Symbol;Acc:HGNC:6068]	-	9	1	0.208531	0.0256914
ENSG00000182575	2.87088	7.31513	0.0348666	0.845742	NXPH3	17	49575858	49583827	+	5648	protein_coding	neurexophilin 3 [Source:HGNC Symbol;Acc:HGNC:8077]	-	9	1	0.0735471	0.00906112
ENSG00000279518	-3.16897	8.99404	0.0348666	0.845742	AC083843.3	8	134783694	134785879	-	2186	TEC	TEC	-	1	9	0.0211139	0.210702
ENSG00000234353	2.87088	7.31513	0.0348666	0.845742	AP000346.2	22	23638492	23640762	-	906	transcribed_unprocessed_pseudogene	immunoglobulin lambda-like polypeptide 1 (IGLL1) pseudogene	-	9	1	0.458492	0.056487
ENSG00000261456	2.87088	7.31513	0.0348666	0.845742	TUBB8	10	46892	74163	-	2981	protein_coding	tubulin beta 8 class VIII [Source:HGNC Symbol;Acc:HGNC:20773]	-	9	1	0.139347	0.0171678
ENSG00000265112	-3.16897	8.99404	0.0348666	0.845742	MIR3153	9	89312225	89312306	+	82	miRNA	microRNA 3153 [Source:HGNC Symbol;Acc:HGNC:38289]	-	1	9	0.562865	5.61701
ENSG00000199325	-3.16897	8.99404	0.0348666	0.845742	RNU4-39P	11	66614964	66615090	-	127	snRNA	RNA, U4 small nuclear 39, pseudogene [Source:HGNC Symbol;Acc:HGNC:46975]	-	1	9	0.363424	3.62673
ENSG00000226981	2.87088	7.31513	0.0348666	0.845742	ABHD17AP6	17	20814620	20844257	+	1044	unprocessed_pseudogene	abhydrolase domain containing 17A pseudogene 6 [Source:HGNC Symbol;Acc:HGNC:34044]	-	9	1	0.397887	0.0490203
ENSG00000270903	-3.16897	8.99404	0.0348666	0.845742	HNRNPA3P9	11	32591793	32592771	-	979	processed_pseudogene	heterogeneous nuclear ribonucleoprotein A3 pseudogene 9 [Source:HGNC Symbol;Acc:HGNC:48755]	-	1	9	0.0471449	0.470475
ENSG00000278071	-3.16897	8.99404	0.0348666	0.845742	AL161669.3	14	103208100	103208876	+	777	lincRNA	novel transcript	-	1	9	0.0594014	0.592786
ENSG00000284664	-3.16897	8.99404	0.0348666	0.845742	AL161756.3	14	64349677	64352284	-	2071	lincRNA	novel transcript	-	1	9	0.0222863	0.222402
ENSG00000235081	-3.16897	8.99404	0.0348666	0.845742	AC245052.3	19	54229036	54230213	+	901	processed_pseudogene	novel pseudogene	-	1	9	0.0512263	0.511204
ENSG00000251666	-3.16897	8.99404	0.0348666	0.845742	ZNF346-IT1	5	177051714	177052963	+	745	sense_intronic	ZNF346 intronic transcript 1 [Source:HGNC Symbol;Acc:HGNC:41423]	-	1	9	0.0619529	0.618248
ENSG00000198062	-3.16897	8.99404	0.0348666	0.845742	POTEH	22	15690026	15721631	+	2293	protein_coding	POTE ankyrin domain family member H [Source:HGNC Symbol;Acc:HGNC:133]	-	1	9	0.0201286	0.20087
ENSG00000271803	-3.16897	8.99404	0.0348666	0.845742	AL121906.1	20	33674517	33675380	+	440	antisense	novel transcript, antisense to NECAB3	-	1	9	0.104897	1.04681
ENSG00000267581	2.87088	7.31513	0.0348666	0.845742	AC011477.4	19	19761038	19821716	-	609	lincRNA	novel transcript	-	9	1	0.682092	0.0840348
ENSG00000252915	-3.16897	8.99404	0.0348666	0.845742	RF00019	21	39344537	39344628	+	92	misc_RNA		-	1	9	0.501684	5.00646
ENSG00000225331	2.87088	7.31513	0.0348666	0.845742	LINC01678	21	44158740	44160076	-	867	lincRNA	long intergenic non-protein coding RNA 1678 [Source:HGNC Symbol;Acc:HGNC:52466]	-	9	1	0.479117	0.0590279
ENSG00000254593	2.87088	7.31513	0.0348666	0.845742	OR7E126P	11	71903194	71904081	+	888	unprocessed_pseudogene	olfactory receptor family 7 subfamily E member 126 pseudogene [Source:HGNC Symbol;Acc:HGNC:15304]	-	9	1	0.467786	0.057632
ENSG00000244332	-3.16897	8.99404	0.0348666	0.845742	AL138759.1	10	94577439	94611238	+	645	sense_overlapping	novel transcript	-	1	9	0.071558	0.7141
ENSG00000237979	-3.16897	8.99404	0.0348666	0.845742	AC007389.4	2	65500993	65502138	-	793	processed_pseudogene	DnaJ (Hsp40) homolog, subfamily B, member 12 (DNAJB12) pseudogene	-	1	9	0.0582029	0.580826
ENSG00000230536	-3.16897	8.99404	0.0348666	0.845742	AL360268.1	9	128090969	128094457	-	765	antisense	novel transcript	-	1	9	0.0603332	0.602085
ENSG00000258450	-3.16897	8.99404	0.0348666	0.845742	AL139099.2	14	49629291	49629890	-	401	sense_intronic	novel transcript	-	1	9	0.115099	1.14862
ENSG00000285570	-3.16897	8.99404	0.0348666	0.845742	AL590666.4	1	156689676	156704757	+	956	antisense		-	1	9	0.0482792	0.481794
ENSG00000248254	-3.16897	8.99404	0.0348666	0.845742	AC107398.2	4	47556731	47560259	-	601	antisense	novel transcript	-	1	9	0.0767968	0.766381
ENSG00000168484	2.87088	7.31513	0.0348666	0.845742	SFTPC	8	22156913	22164479	+	3188	protein_coding	surfactant protein C [Source:HGNC Symbol;Acc:HGNC:10802]	-	9	1	0.130299	0.0160531
ENSG00000188176	2.87088	7.31513	0.0348666	0.845742	SMTNL2	17	4583999	4608319	+	2470	protein_coding	smoothelin like 2 [Source:HGNC Symbol;Acc:HGNC:24764]	-	9	1	0.168176	0.0207195
ENSG00000162782	-3.16897	8.99404	0.0348666	0.845742	TDRD5	1	179591613	179691272	+	4256	protein_coding	tudor domain containing 5 [Source:HGNC Symbol;Acc:HGNC:20614]	-	1	9	0.0108447	0.108222
ENSG00000250726	-3.16897	8.99404	0.0348666	0.845742	AC107222.1	4	184072403	184073039	+	637	processed_pseudogene	low density lipoprotein receptor-related protein 8, apolipoprotein e receptor (LRP8) pseudogene	-	1	9	0.0724567	0.723069
ENSG00000257069	2.87088	7.31513	0.0348666	0.845742	KCNK4-TEX40	11	64291722	64304769	+	2733	processed_transcript	KCNK4-TEX40 readthrough [Source:NCBI gene;Acc:106780802]	-	9	1	0.151992	0.0187256
ENSG00000273802	-1.08617	2.12309	0.0350671	0.845742	HIST1H2BG	6	26215159	26216692	-	1534	protein_coding	histone cluster 1 H2B family member g [Source:HGNC Symbol;Acc:HGNC:4746]	-	42	80	1.26369	2.66895
ENSG00000105085	1.03192	2.04474	0.0353634	0.845742	MED26	19	16574907	16629062	-	5330	protein_coding	mediator complex subunit 26 [Source:HGNC Symbol;Acc:HGNC:2376]	-	112	49	0.969859	0.470485
ENSG00000122877	1.23967	2.36145	0.035482	0.845742	EGR2	10	62811996	62919900	-	3689	protein_coding	early growth response 2 [Source:HGNC Symbol;Acc:HGNC:3239]	zf-C2H2	45	17	0.563017	0.23584
ENSG00000144158	-1.03162	2.04432	0.0357847	0.845742	AL078621.1	2	113657908	113658675	+	768	processed_pseudogene	small nuclear ribonucleoprotein polypeptide A' (SNRPA1) pseudogene	-	54	99	3.24527	6.59706
ENSG00000235703	-1.12817	2.18581	0.035924	0.845742	LINC00894	X	149938628	150224580	+	6323	antisense	long intergenic non-protein coding RNA 894 [Source:HGNC Symbol;Acc:HGNC:48579]	-	27	53	0.197087	0.428972
ENSG00000173557	-1.26826	2.40871	0.0361572	0.845742	C2orf70	2	26562582	26579532	+	2507	protein_coding	chromosome 2 open reading frame 70 [Source:HGNC Symbol;Acc:HGNC:27938]	-	18	39	0.331387	0.796135
ENSG00000111087	1.14632	2.21348	0.0365821	0.845742	GLI1	12	57460135	57472262	+	4204	protein_coding	GLI family zinc finger 1 [Source:HGNC Symbol;Acc:HGNC:4317]	zf-C2H2	57	23	0.625792	0.279989
ENSG00000272455	1.00932	2.01297	0.0366392	0.845742	AL391244.3	1	1409096	1410618	+	1523	lincRNA	novel transcript	-	117	52	3.54571	1.74735
ENSG00000225857	-1.0256	2.03581	0.0366865	0.845742	AL162431.1	1	180906651	180909166	+	748	lincRNA	novel transcript	-	46	84	2.8384	5.74717
ENSG00000220323	-1.10996	2.1584	0.037032	0.845742	HIST2H2BD	1	149842875	149846486	+	3612	transcribed_unprocessed_pseudogene	histone cluster 2 H2B family member d (pseudogene) [Source:HGNC Symbol;Acc:HGNC:20517]	-	32	62	0.408903	0.878457
ENSG00000111325	-1.10996	2.1584	0.037032	0.845742	OGFOD2	12	122974580	122980043	+	4608	protein_coding	2-oxoglutarate and iron dependent oxygenase domain containing 2 [Source:HGNC Symbol;Acc:HGNC:25823]	-	32	62	0.32052	0.688582
ENSG00000260853	-1.07832	2.11157	0.0371901	0.845742	AC109460.2	16	28956687	28966883	-	1092	antisense	novel transcript, antisense to NFATC2IP	-	38	72	1.60612	3.37432
ENSG00000260236	1.31184	2.48259	0.0376208	0.845742	AC099778.1	3	47379089	47380999	-	1911	antisense	novel transcript, antisense to PTPN23	-	39	14	0.941937	0.374924
ENSG00000056972	-1.02096	2.02927	0.0376598	0.845742	TRAF3IP2	6	111556454	111606278	-	6553	protein_coding	TRAF3 interacting protein 2 [Source:HGNC Symbol;Acc:HGNC:1343]	-	50	91	0.352166	0.710686
ENSG00000108924	1.12714	2.18425	0.0376897	0.845742	HLF	17	55265012	55325065	+	6602	protein_coding	HLF, PAR bZIP transcription factor [Source:HGNC Symbol;Acc:HGNC:4977]	TF_bZIP	66	27	0.461409	0.209298
ENSG00000260097	-1.10836	2.156	0.0376897	0.845742	SPDYE6	7	102347206	102356444	-	1691	protein_coding	speedy/RINGO cell cycle regulator family member E6 [Source:HGNC Symbol;Acc:HGNC:35465]	-	31	60	0.846128	1.81587
ENSG00000198569	-1.00536	2.00744	0.0382906	0.845742	SLC34A3	9	137230757	137236554	+	2303	protein_coding	solute carrier family 34 member 3 [Source:HGNC Symbol;Acc:HGNC:20305]	-	60	108	1.20247	2.39997
ENSG00000234423	-1.10665	2.15345	0.0383872	0.845742	LINC01250	2	2895048	3126026	-	2344	lincRNA	long intergenic non-protein coding RNA 1250 [Source:HGNC Symbol;Acc:HGNC:49844]	-	30	58	0.59072	1.26633
ENSG00000236861	-1.28898	2.44356	0.0384107	0.845742	AC006378.1	7	93969442	94011113	+	636	antisense	novel transcript	-	15	33	1.08856	2.65542
ENSG00000279713	-1.28898	2.44356	0.0384107	0.845742	AC080038.3	17	62679403	62681354	-	1952	TEC	TEC	-	15	33	0.354674	0.865188
ENSG00000162461	-1.01418	2.01976	0.039026	0.845742	SLC25A34	1	15736405	15741396	+	3195	protein_coding	solute carrier family 25 member 34 [Source:HGNC Symbol;Acc:HGNC:27653]	-	53	96	0.765637	1.53772
ENSG00000172183	-1.10482	2.15072	0.0391281	0.845742	ISG20	15	88636153	88656483	+	7363	protein_coding	interferon stimulated exonuclease gene 20 [Source:HGNC Symbol;Acc:HGNC:6130]	-	29	56	0.181786	0.389233
ENSG00000285867	1.37666	2.59667	0.0392385	0.845742	BX470102.2	1	153586813	153606283	-	3176	lincRNA		-	35	12	0.508634	0.193365
ENSG00000164845	-1.29775	2.45846	0.0392385	0.845742	FAM86FP	12	8232512	8242948	-	994	transcribed_unprocessed_pseudogene	family with sequence similarity 86 member F, pseudogene [Source:HGNC Symbol;Acc:HGNC:42357]	-	14	31	0.650069	1.59607
ENSG00000013619	1.02055	2.02869	0.0399038	0.845742	MAMLD1	X	150361422	150514178	+	5958	protein_coding	mastermind like domain containing 1 [Source:HGNC Symbol;Acc:HGNC:2568]	-	93	41	0.720444	0.352176
ENSG00000225649	1.41635	2.6691	0.0401014	0.845742	AC064875.1	2	12966784	13007013	-	2846	processed_transcript	uncharacterized LOC100506474 [Source:NCBI gene;Acc:100506474]	-	33	11	0.535176	0.197804
ENSG00000123870	-1.06084	2.08614	0.0402485	0.845742	ZNF137P	19	52588505	52597345	+	2029	transcribed_unprocessed_pseudogene	zinc finger protein 137, pseudogene [Source:HGNC Symbol;Acc:HGNC:12921]	-	39	73	0.887157	1.84127
ENSG00000175352	1.02475	2.03461	0.0405352	0.845742	NRIP3	11	8980576	9004049	-	4123	protein_coding	nuclear receptor interacting protein 3 [Source:HGNC Symbol;Acc:HGNC:1167]	-	91	40	1.0187	0.496504
ENSG00000256982	-1.22391	2.33579	0.0405677	0.845742	AC135782.1	16	89046172	89052965	-	2154	lincRNA	novel transcript	-	20	42	0.428551	0.997884
ENSG00000119938	-1.00504	2.007	0.0407257	0.845742	PPP1R3C	10	91628442	91633054	-	2524	protein_coding	protein phosphatase 1 regulatory subunit 3C [Source:HGNC Symbol;Acc:HGNC:9293]	-	50	90	0.91432	1.82486
ENSG00000188868	-1.10075	2.14466	0.0407562	0.845742	ZNF563	19	12317477	12333720	-	2847	protein_coding	zinc finger protein 563 [Source:HGNC Symbol;Acc:HGNC:30498]	zf-C2H2	27	52	0.437718	0.934743
ENSG00000189136	-1.05817	2.08229	0.0409575	0.845742	UBE2Q2P1	15	84526781	84571216	-	3222	transcribed_unprocessed_pseudogene	ubiquitin conjugating enzyme E2 Q2 pseudogene 1 [Source:HGNC Symbol;Acc:HGNC:37439]	-	38	71	0.544347	1.12774
ENSG00000172296	-5.69475	51.7954	0.0409646	0.845742	SPTLC3	20	13008979	13169103	+	8520	protein_coding	serine palmitoyltransferase long chain base subunit 3 [Source:HGNC Symbol;Acc:HGNC:16253]	-	0	6	0	0.0360403
ENSG00000130545	-5.69475	51.7954	0.0409646	0.845742	CRB3	19	6463777	6467221	+	1592	protein_coding	crumbs 3, cell polarity complex component [Source:HGNC Symbol;Acc:HGNC:20237]	-	0	6	0	0.192879
ENSG00000172594	5.53904	46.4962	0.0409646	0.845742	SMPDL3A	6	122789049	122809720	+	2349	protein_coding	sphingomyelin phosphodiesterase acid like 3A [Source:HGNC Symbol;Acc:HGNC:17389]	-	6	0	0.117892	0
ENSG00000270959	5.53904	46.4962	0.0409646	0.845742	LPP-AS2	3	188151206	188154057	-	2852	antisense	LPP antisense RNA 2 [Source:HGNC Symbol;Acc:HGNC:27952]	-	6	0	0.0971001	0
ENSG00000171346	5.53904	46.4962	0.0409646	0.845742	KRT15	17	41513743	41522529	-	7069	protein_coding	keratin 15 [Source:HGNC Symbol;Acc:HGNC:6421]	-	6	0	0.0391752	0
ENSG00000156006	-5.69475	51.7954	0.0409646	0.845742	NAT2	8	18391245	18401218	+	1322	protein_coding	N-acetyltransferase 2 [Source:HGNC Symbol;Acc:HGNC:7646]	-	0	6	0	0.232272
ENSG00000144035	-5.69475	51.7954	0.0409646	0.845742	NAT8	2	73640832	73642393	-	947	protein_coding	N-acetyltransferase 8 (putative) [Source:HGNC Symbol;Acc:HGNC:18069]	-	0	6	0	0.324248
ENSG00000175544	5.53904	46.4962	0.0409646	0.845742	CABP4	11	67452406	67460313	+	3786	protein_coding	calcium binding protein 4 [Source:HGNC Symbol;Acc:HGNC:1386]	-	6	0	0.0731456	0
ENSG00000170801	5.53904	46.4962	0.0409646	0.845742	HTRA3	4	8269765	8307111	+	3321	protein_coding	HtrA serine peptidase 3 [Source:HGNC Symbol;Acc:HGNC:30406]	-	6	0	0.0833873	0
ENSG00000225489	-5.69475	51.7954	0.0409646	0.845742	AL354707.1	9	6716495	6727438	+	2839	lincRNA	novel transcript	-	0	6	0	0.108159
ENSG00000147869	5.53904	46.4962	0.0409646	0.845742	CER1	9	14719724	14722717	-	1215	protein_coding	cerberus 1, DAN family BMP antagonist [Source:HGNC Symbol;Acc:HGNC:1862]	-	6	0	0.227925	0
ENSG00000262585	5.53904	46.4962	0.0409646	0.845742	LINC01979	17	79915252	79926725	-	5271	lincRNA	long intergenic non-protein coding RNA 1979 [Source:HGNC Symbol;Acc:HGNC:52807]	-	6	0	0.0525383	0
ENSG00000106069	5.53904	46.4962	0.0409646	0.845742	CHN2	7	29146569	29514328	+	8801	protein_coding	chimerin 2 [Source:HGNC Symbol;Acc:HGNC:1944]	-	6	0	0.0314657	0
ENSG00000272444	-5.69475	51.7954	0.0409646	0.845742	AL118558.4	14	101952416	101953063	+	648	lincRNA	novel transcript	-	0	6	0	0.473863
ENSG00000111863	-5.69475	51.7954	0.0409646	0.845742	ADTRP	6	11712054	11807046	-	4150	protein_coding	androgen dependent TFPI regulating protein [Source:HGNC Symbol;Acc:HGNC:21214]	-	0	6	0	0.0739911
ENSG00000180279	-5.69475	51.7954	0.0409646	0.845742	LINC01869	19	50808874	50818880	+	1416	lincRNA	long intergenic non-protein coding RNA 1869 [Source:HGNC Symbol;Acc:HGNC:25050]	-	0	6	0	0.216853
ENSG00000273473	-5.69475	51.7954	0.0409646	0.845742	BX649601.1	9	134168769	134169340	+	572	lincRNA	novel transcript	-	0	6	0	0.536824
ENSG00000172497	5.53904	46.4962	0.0409646	0.845742	ACOT12	5	81330005	81394179	-	2444	protein_coding	acyl-CoA thioesterase 12 [Source:HGNC Symbol;Acc:HGNC:24436]	-	6	0	0.11331	0
ENSG00000226363	5.53904	46.4962	0.0409646	0.845742	HAGLROS	2	176177717	176179008	+	1121	lincRNA	HAGLR opposite strand lncRNA [Source:HGNC Symbol;Acc:HGNC:50646]	-	6	0	0.247038	0
ENSG00000224969	-5.69475	51.7954	0.0409646	0.845742	AL645608.1	1	1011997	1013193	-	471	antisense	novel transcript	-	0	6	0	0.651939
ENSG00000128310	5.53904	46.4962	0.0409646	0.845742	GALR3	22	37823382	37825495	+	1157	protein_coding	galanin receptor 3 [Source:HGNC Symbol;Acc:HGNC:4134]	-	6	0	0.239351	0
ENSG00000272369	-5.69475	51.7954	0.0409646	0.845742	AC008035.1	12	46537502	46652550	+	448	lincRNA	novel transcript	-	0	6	0	0.685409
ENSG00000278985	-5.69475	51.7954	0.0409646	0.845742	AC092718.7	16	80982319	80984094	-	1776	TEC	novel transcript	-	0	6	0	0.172896
ENSG00000206633	5.53904	46.4962	0.0409646	0.845742	SNORA80B	2	10446714	10446849	-	136	snoRNA	small nucleolar RNA, H/ACA box 80B [Source:HGNC Symbol;Acc:HGNC:34355]	-	6	0	2.03625	0
ENSG00000162779	5.53904	46.4962	0.0409646	0.845742	AXDND1	1	179365720	179554735	+	6089	protein_coding	axonemal dynein light chain domain containing 1 [Source:HGNC Symbol;Acc:HGNC:26564]	-	6	0	0.0454803	0
ENSG00000254634	-5.69475	51.7954	0.0409646	0.845742	SMG1P6	16	29425800	29447026	-	2930	unprocessed_pseudogene	SMG1 pseudogene 6 [Source:HGNC Symbol;Acc:HGNC:49863]	-	0	6	0	0.1048
ENSG00000255282	5.53904	46.4962	0.0409646	0.845742	WTAPP1	11	102746968	102836766	+	3331	transcribed_processed_pseudogene	Wilms tumor 1 associated protein pseudogene 1 [Source:HGNC Symbol;Acc:HGNC:44115]	-	6	0	0.083137	0
ENSG00000215221	5.53904	46.4962	0.0409646	0.845742	UBA52P6	9	22012155	22012536	+	382	processed_pseudogene	ubiquitin A-52 residue ribosomal protein fusion product 1 pseudogene 6 [Source:HGNC Symbol;Acc:HGNC:36763]	-	6	0	0.724946	0
ENSG00000274554	-5.69475	51.7954	0.0409646	0.845742	AC083806.2	12	116948738	116951422	-	2685	antisense	novel transcript, antisense to FBXW8	-	0	6	0	0.114362
ENSG00000165182	5.53904	46.4962	0.0409646	0.845742	CXorf58	X	23907801	23939509	+	2050	protein_coding	chromosome X open reading frame 58 [Source:HGNC Symbol;Acc:HGNC:26356]	-	6	0	0.135087	0
ENSG00000123009	5.53904	46.4962	0.0409646	0.845742	NME2P1	12	120282303	120282716	+	414	processed_pseudogene	NME/NM23 nucleoside diphosphate kinase 2 pseudogene 1 [Source:HGNC Symbol;Acc:HGNC:31358]	-	6	0	0.668911	0
ENSG00000275401	-5.69475	51.7954	0.0409646	0.845742	AL391095.3	20	38418483	38419202	-	720	lincRNA	novel transcript	-	0	6	0	0.426477
ENSG00000161281	-5.69475	51.7954	0.0409646	0.845742	COX7A1	19	36150922	36152869	-	1006	protein_coding	cytochrome c oxidase subunit 7A1 [Source:HGNC Symbol;Acc:HGNC:2287]	-	0	6	0	0.305232
ENSG00000206897	-5.69475	51.7954	0.0409646	0.845742	SNORA9B	12	123616708	123616840	+	133	snoRNA	small nucleolar RNA, H/ACA box 9B [Source:HGNC Symbol;Acc:HGNC:52223]	-	0	6	0	2.30875
ENSG00000267426	5.53904	46.4962	0.0409646	0.845742	AC087289.3	17	75898645	75930129	-	5062	protein_coding	novel transcript	-	6	0	0.0547075	0
ENSG00000103313	5.53904	46.4962	0.0409646	0.845742	MEFV	16	3242028	3256627	-	4819	protein_coding	MEFV, pyrin innate immunity regulator [Source:HGNC Symbol;Acc:HGNC:6998]	-	6	0	0.0574661	0
ENSG00000280033	-5.69475	51.7954	0.0409646	0.845742	AC116407.4	17	32159311	32160371	+	1061	TEC	TEC	-	0	6	0	0.289409
ENSG00000233266	-5.69475	51.7954	0.0409646	0.845742	HMGB1P31	2	54051334	54051760	+	427	processed_pseudogene	high mobility group box 1 pseudogene 31 [Source:HGNC Symbol;Acc:HGNC:39122]	-	0	6	0	0.719117
ENSG00000186714	-5.69475	51.7954	0.0409646	0.845742	CCDC73	11	32602246	32794658	-	7875	protein_coding	coiled-coil domain containing 73 [Source:HGNC Symbol;Acc:HGNC:23261]	-	0	6	0	0.0389921
ENSG00000140932	5.53904	46.4962	0.0409646	0.845742	CMTM2	16	66579448	66588275	+	1151	protein_coding	CKLF like MARVEL transmembrane domain containing 2 [Source:HGNC Symbol;Acc:HGNC:19173]	-	6	0	0.240599	0
ENSG00000229376	-5.69475	51.7954	0.0409646	0.845742	CICP3	1	722092	724903	+	2455	processed_pseudogene	capicua transcriptional repressor pseudogene 3 [Source:HGNC Symbol;Acc:HGNC:37742]	-	0	6	0	0.125077
ENSG00000219470	-5.69475	51.7954	0.0409646	0.845742	AL355802.1	6	43538822	43539703	-	882	processed_pseudogene	40S ribosomal protein S2 (RPS2) pseudogene	-	0	6	0	0.348144
ENSG00000278472	5.53904	46.4962	0.0409646	0.845742	AC009268.2	15	33972059	33972515	-	457	sense_intronic	novel transcript, sense intronic to AVEN	-	6	0	0.605972	0
ENSG00000235413	-5.69475	51.7954	0.0409646	0.845742	KRT18P63	4	17911674	17912976	+	979	processed_pseudogene	keratin 18 pseudogene 63 [Source:HGNC Symbol;Acc:HGNC:48890]	-	0	6	0	0.31365
ENSG00000204380	-5.69475	51.7954	0.0409646	0.845742	PKP4-AS1	2	158658337	158735002	-	5874	antisense	PKP4 antisense RNA 1 [Source:HGNC Symbol;Acc:HGNC:52580]	-	0	6	0	0.052275
ENSG00000197165	-5.69475	51.7954	0.0409646	0.845742	SULT1A2	16	28591943	28597109	-	2275	protein_coding	sulfotransferase family 1A member 2 [Source:HGNC Symbol;Acc:HGNC:11454]	-	0	6	0	0.134973
ENSG00000258881	-5.69475	51.7954	0.0409646	0.845742	AC007040.2	2	70939318	70995336	-	4451	protein_coding	novel protein	-	0	6	0	0.0689875
ENSG00000101204	5.53904	46.4962	0.0409646	0.845742	CHRNA4	20	63343223	63378401	-	11049	protein_coding	cholinergic receptor nicotinic alpha 4 subunit [Source:HGNC Symbol;Acc:HGNC:1958]	-	6	0	0.0250637	0
ENSG00000280424	5.53904	46.4962	0.0409646	0.845742	BX537318.2	22	46006616	46010777	+	4162	TEC	dynein heavy chain -like pseudogene [Source:NCBI gene;Acc:730668]	-	6	0	0.0665376	0
ENSG00000224072	-5.69475	51.7954	0.0409646	0.845742	AL139811.1	X	46454097	46457199	-	2299	processed_pseudogene	transmembrane protein vezatin pseudogene	-	0	6	0	0.133564
ENSG00000232218	-5.69475	51.7954	0.0409646	0.845742	AL021937.2	22	32386668	32386868	+	201	unprocessed_pseudogene	Ral-GDS related protein Rgr (Rgr) pseudogene	-	0	6	0	1.52768
ENSG00000260238	-5.69475	51.7954	0.0409646	0.845742	PMF1-BGLAP	1	156212982	156243332	+	1007	protein_coding	PMF1-BGLAP readthrough [Source:HGNC Symbol;Acc:HGNC:42953]	-	0	6	0	0.304929
ENSG00000260167	5.53904	46.4962	0.0409646	0.845742	AC093249.2	16	30585907	30608593	+	482	antisense	novel transcript, antisense to ZNF689	-	6	0	0.574542	0
ENSG00000188316	-5.69475	51.7954	0.0409646	0.845742	ENO4	10	116849512	116911788	+	3164	protein_coding	enolase 4 [Source:HGNC Symbol;Acc:HGNC:31670]	-	0	6	0	0.097049
ENSG00000276255	-5.69475	51.7954	0.0409646	0.845742	AL136379.1	1	228073909	228076550	-	2642	lincRNA	novel transcript	-	0	6	0	0.116224
ENSG00000187024	5.53904	46.4962	0.0409646	0.845742	PTRH1	9	127690348	127724873	-	4072	protein_coding	peptidyl-tRNA hydrolase 1 homolog [Source:HGNC Symbol;Acc:HGNC:27039]	-	6	0	0.0680082	0
ENSG00000232739	-5.69475	51.7954	0.0409646	0.845742	AL607028.1	10	15237492	15241767	+	794	antisense	novel transcript	-	0	6	0	0.386729
ENSG00000224490	-5.69475	51.7954	0.0409646	0.845742	TTC21B-AS1	2	165933857	165949891	+	2558	processed_transcript	TTC21B antisense RNA 1 [Source:HGNC Symbol;Acc:HGNC:41115]	-	0	6	0	0.12004
ENSG00000212396	-5.69475	51.7954	0.0409646	0.845742	RNA5SP323	10	93510548	93510680	-	133	rRNA_pseudogene	RNA, 5S ribosomal pseudogene 323 [Source:HGNC Symbol;Acc:HGNC:43223]	-	0	6	0	2.30875
ENSG00000225193	5.53904	46.4962	0.0409646	0.845742	RPS12P26	15	90206572	90206967	+	396	transcribed_processed_pseudogene	ribosomal protein S12 pseudogene 26 [Source:HGNC Symbol;Acc:HGNC:36320]	-	6	0	0.699317	0
ENSG00000271924	-5.69475	51.7954	0.0409646	0.845742	RNA5SP108	2	161409554	161409670	+	117	rRNA_pseudogene	RNA, 5S ribosomal pseudogene 108 [Source:HGNC Symbol;Acc:HGNC:42906]	-	0	6	0	2.62447
ENSG00000274737	-5.69475	51.7954	0.0409646	0.845742	AC004466.2	12	47817451	47817966	-	516	sense_intronic	novel transcript, sense intronic to HDAC7	-	0	6	0	0.595084
ENSG00000277425	-5.69475	51.7954	0.0409646	0.845742	AL121890.4	20	5066082	5068154	-	609	lincRNA	novel transcript	-	0	6	0	0.504209
ENSG00000258488	-5.69475	51.7954	0.0409646	0.845742	AC023310.1	15	20516252	20520627	+	735	unprocessed_pseudogene	E3 ubiquitin-protein ligase HERC2-like [Source:NCBI gene;Acc:100996379]	-	0	6	0	0.417773
ENSG00000260037	-5.69475	51.7954	0.0409646	0.845742	AC104938.1	15	71818396	71823384	+	896	antisense	novel transcript, antisense to MYO9A	-	0	6	0	0.342704
ENSG00000233578	5.53904	46.4962	0.0409646	0.845742	EIF4EP1	20	5548840	5549481	+	642	processed_pseudogene	eukaryotic translation initiation factor 4E pseudogene 1 [Source:HGNC Symbol;Acc:HGNC:3292]	-	6	0	0.431354	0
ENSG00000274191	-5.69475	51.7954	0.0409646	0.845742	AC026333.4	12	122634130	122634673	+	544	lincRNA	novel transcript	-	0	6	0	0.564454
ENSG00000064205	5.53904	46.4962	0.0409646	0.845742	WISP2	20	44714844	44728509	+	4981	protein_coding	WNT1 inducible signaling pathway protein 2 [Source:HGNC Symbol;Acc:HGNC:12770]	-	6	0	0.0555971	0
ENSG00000266975	-5.69475	51.7954	0.0409646	0.845742	FARSA-AS1	19	12930522	12933296	+	241	antisense	FARSA antisense RNA 1 [Source:HGNC Symbol;Acc:HGNC:50479]	-	0	6	0	1.27412
ENSG00000248483	-5.69475	51.7954	0.0409646	0.845742	POU5F2	5	93733220	93741637	-	8418	protein_coding	POU domain class 5, transcription factor 2 [Source:HGNC Symbol;Acc:HGNC:26367]	Pou	0	6	0	0.036477
ENSG00000258343	-5.69475	51.7954	0.0409646	0.845742	AC090001.1	12	95795345	95858839	-	924	antisense	uncharacterized LOC105369921 [Source:NCBI gene;Acc:105369921]	-	0	6	0	0.332319
ENSG00000270048	-5.69475	51.7954	0.0409646	0.845742	AC068790.4	12	123962555	123962817	-	263	sense_intronic	novel transcript, sense intronic to CCDC92	-	0	6	0	1.16754
ENSG00000227245	-5.69475	51.7954	0.0409646	0.845742	AC092042.1	3	43087479	43088068	+	509	lincRNA	novel transcript	-	0	6	0	0.603267
ENSG00000234203	-5.69475	51.7954	0.0409646	0.845742	AC004771.2	17	4972851	4974681	+	439	antisense	novel transcript, antisense to CAMTA2	-	0	6	0	0.69946
ENSG00000243749	5.53904	46.4962	0.0409646	0.845742	TMEM35B	1	34981535	34985353	-	922	protein_coding	transmembrane protein 35B [Source:HGNC Symbol;Acc:HGNC:40021]	-	6	0	0.300357	0
ENSG00000240003	-5.69475	51.7954	0.0409646	0.845742	RPL7P24	5	80500332	80501400	+	752	processed_pseudogene	ribosomal protein L7 pseudogene 24 [Source:HGNC Symbol;Acc:HGNC:36715]	-	0	6	0	0.408329
ENSG00000230825	5.53904	46.4962	0.0409646	0.845742	AC005532.1	7	7255154	7277779	+	1237	processed_transcript	uncharacterized LOC101927354 [Source:NCBI gene;Acc:101927354]	-	6	0	0.223872	0
ENSG00000171102	-5.69475	51.7954	0.0409646	0.845742	OBP2B	9	133205277	133209250	-	1135	protein_coding	odorant binding protein 2B [Source:HGNC Symbol;Acc:HGNC:23381]	-	0	6	0	0.27054
ENSG00000131233	5.53904	46.4962	0.0409646	0.845742	GJA9	1	38874451	38881587	-	2057	protein_coding	gap junction protein alpha 9 [Source:HGNC Symbol;Acc:HGNC:19155]	-	6	0	0.134628	0
ENSG00000207217	-5.69475	51.7954	0.0409646	0.845742	SNORA80D	7	6016877	6017011	+	135	snoRNA	small nucleolar RNA, H/ACA box 80D [Source:HGNC Symbol;Acc:HGNC:50435]	-	0	6	0	2.27454
ENSG00000197177	-5.69475	51.7954	0.0409646	0.845742	ADGRA1	10	133070929	133131675	+	6503	protein_coding	adhesion G protein-coupled receptor A1 [Source:HGNC Symbol;Acc:HGNC:13838]	-	0	6	0	0.0472187
ENSG00000279532	-5.69475	51.7954	0.0409646	0.845742	AC002094.5	17	28373673	28374301	-	629	TEC	novel transcript	-	0	6	0	0.488177
ENSG00000188305	-5.69475	51.7954	0.0409646	0.845742	PEAK3	19	2274622	2282176	-	2574	protein_coding	PEAK family member 3 [Source:HGNC Symbol;Acc:HGNC:24793]	-	0	6	0	0.119294
ENSG00000105675	5.53904	46.4962	0.0409646	0.845742	ATP4A	19	35550043	35563658	-	3889	protein_coding	ATPase H+/K+ transporting subunit alpha [Source:HGNC Symbol;Acc:HGNC:819]	-	6	0	0.0712084	0
ENSG00000223821	-5.69475	51.7954	0.0409646	0.845742	AL603910.1	6	73492025	73492742	-	370	antisense	novel transcript	-	0	6	0	0.8299
ENSG00000226045	5.53904	46.4962	0.0409646	0.845742	AC234644.1	7	130645225	130645594	-	370	processed_pseudogene	glutamyl-tRNA(Gln) amidotransferase, subunit C homolog (bacterial)(GATC) pseudogene	-	6	0	0.748458	0
ENSG00000271142	5.53904	46.4962	0.0409646	0.845742	YWHAQP7	12	76619386	76620043	+	658	processed_pseudogene	YWHAQ pseudogene 7 [Source:HGNC Symbol;Acc:HGNC:37686]	-	6	0	0.420865	0
ENSG00000267117	-5.69475	51.7954	0.0409646	0.845742	AC010525.1	19	55694118	55694558	-	441	antisense	novel transcript, antisense to EPN1	-	0	6	0	0.696288
ENSG00000172014	-5.69475	51.7954	0.0409646	0.845742	ANKRD20A4	9	64369394	64413142	+	4510	protein_coding	ankyrin repeat domain 20 family member A4 [Source:HGNC Symbol;Acc:HGNC:31982]	-	0	6	0	0.068085
ENSG00000030304	-5.69475	51.7954	0.0409646	0.845742	MUSK	9	110668771	110801620	+	4246	protein_coding	muscle associated receptor tyrosine kinase [Source:HGNC Symbol;Acc:HGNC:7525]	-	0	6	0	0.0723182
ENSG00000207185	-5.69475	51.7954	0.0409646	0.845742	RNU6-1157P	11	118593988	118594093	+	106	snRNA	RNA, U6 small nuclear 1157, pseudogene [Source:HGNC Symbol;Acc:HGNC:48120]	-	0	6	0	2.89682
ENSG00000213453	-5.69475	51.7954	0.0409646	0.845742	FTH1P3	2	27392784	27393367	-	584	processed_pseudogene	ferritin heavy chain 1 pseudogene 3 [Source:HGNC Symbol;Acc:HGNC:3990]	-	0	6	0	0.525793
ENSG00000256712	-5.69475	51.7954	0.0409646	0.845742	AC134349.1	12	11166090	11171353	-	385	sense_intronic	novel transcript	-	0	6	0	0.797567
ENSG00000213272	-5.69475	51.7954	0.0409646	0.845742	RPL7AP9	12	76599671	76600470	+	800	processed_pseudogene	ribosomal protein L7a pseudogene 9 [Source:HGNC Symbol;Acc:HGNC:32398]	-	0	6	0	0.383829
ENSG00000275630	-5.69475	51.7954	0.0409646	0.845742	AC004816.2	14	70822004	70823984	+	284	lincRNA	novel transcript	-	0	6	0	1.08121
ENSG00000280078	-5.69475	51.7954	0.0409646	0.845742	AC016526.3	14	76279173	76283103	+	3931	TEC	TEC	-	0	6	0	0.0781132
ENSG00000233929	5.53904	46.4962	0.0409646	0.845742	MT1XP1	1	16241213	16241398	-	186	processed_pseudogene	metallothionein 1X pseudogene 1 [Source:HGNC Symbol;Acc:HGNC:7442]	-	6	0	1.48887	0
ENSG00000266174	5.53904	46.4962	0.0409646	0.845742	MIR4666A	1	228462074	228462152	+	79	miRNA	microRNA 4666a [Source:HGNC Symbol;Acc:HGNC:41750]	-	6	0	3.50543	0
ENSG00000207955	-5.69475	51.7954	0.0409646	0.845742	AL359091.1	9	128392007	128393510	-	1504	lincRNA	novel transcript	-	0	6	0	0.204164
ENSG00000165192	-5.69475	51.7954	0.0409646	0.845742	ASB11	X	15281697	15315656	-	3140	protein_coding	ankyrin repeat and SOCS box containing 11 [Source:HGNC Symbol;Acc:HGNC:17186]	-	0	6	0	0.0977908
ENSG00000207805	-5.69475	51.7954	0.0409646	0.845742	MIR483	11	2134134	2134209	-	76	miRNA	microRNA 483 [Source:HGNC Symbol;Acc:HGNC:32340]	-	0	6	0	4.0403
ENSG00000215186	-5.69475	51.7954	0.0409646	0.845742	GOLGA6B	15	72654738	72666394	+	2234	protein_coding	golgin A6 family member B [Source:HGNC Symbol;Acc:HGNC:32205]	-	0	6	0	0.13745
ENSG00000261193	5.53904	46.4962	0.0409646	0.845742	AC134312.4	16	88079161	88087383	-	559	lincRNA	novel transcript	-	6	0	0.495401	0
ENSG00000266497	-5.69475	51.7954	0.0409646	0.845742	RDM1P2	17	46503946	46509339	+	470	unprocessed_pseudogene	RDM1 pseudogene 2 [Source:HGNC Symbol;Acc:HGNC:53918]	-	0	6	0	0.653326
ENSG00000261024	-5.69475	51.7954	0.0409646	0.845742	GS1-279B7.1	1	185321157	185335039	-	1205	transcribed_processed_pseudogene	microtubule associated protein 1 light chain 3 beta pseudogene [Source:NCBI gene;Acc:100288079]	-	0	6	0	0.254824
ENSG00000272865	5.53904	46.4962	0.0409646	0.845742	AL591686.2	1	242147514	242209129	+	475	antisense	novel transcript, antisense to PLD5	-	6	0	0.583009	0
ENSG00000235725	5.53904	46.4962	0.0409646	0.845742	AC007389.3	2	65589566	65640177	-	1656	lincRNA	novel transcript	-	6	0	0.167228	0
ENSG00000284575	-5.69475	51.7954	0.0409646	0.845742	MIR4793	3	48644194	48644280	-	87	miRNA	microRNA 4793 [Source:HGNC Symbol;Acc:HGNC:41538]	-	0	6	0	3.52946
ENSG00000270773	-5.69475	51.7954	0.0409646	0.845742	AC137695.2	3	129345411	129346164	+	754	processed_pseudogene	MAP/microtubule affinity-regulating kinase 2, pseudogene	-	0	6	0	0.407246
ENSG00000240173	5.53904	46.4962	0.0409646	0.845742	RN7SL771P	7	140645829	140646126	+	298	misc_RNA	RNA, 7SL, cytoplasmic 771, pseudogene [Source:HGNC Symbol;Acc:HGNC:46787]	-	6	0	0.929293	0
ENSG00000225626	5.53904	46.4962	0.0409646	0.845742	C9orf135-DT	9	69818983	69820739	-	1472	lincRNA	C9orf135 divergent transcript [Source:HGNC Symbol;Acc:HGNC:48713]	-	6	0	0.188131	0
ENSG00000254565	-5.69475	51.7954	0.0409646	0.845742	MTND2P26	11	103406213	103407241	-	1029	processed_pseudogene	MT-ND2 pseudogene 26 [Source:HGNC Symbol;Acc:HGNC:42127]	-	0	6	0	0.298409
ENSG00000177354	-5.69475	51.7954	0.0409646	0.845742	C10orf71	10	49299193	49327487	+	5411	protein_coding	chromosome 10 open reading frame 71 [Source:HGNC Symbol;Acc:HGNC:26973]	-	0	6	0	0.0567479
ENSG00000261774	-5.69475	51.7954	0.0409646	0.845742	AC009075.2	16	72278268	72278568	+	301	processed_pseudogene	c-myc binding protein (MYCBP)	-	0	6	0	1.02014
ENSG00000235888	-5.69475	51.7954	0.0409646	0.845742	AF064858.1	21	38988707	39006153	-	1412	lincRNA	novel transcript	-	0	6	0	0.217467
ENSG00000236136	5.53904	46.4962	0.0409646	0.845742	ADORA2BP1	1	209744373	209745214	+	842	processed_pseudogene	adenosine A2b receptor pseudogene 1 [Source:HGNC Symbol;Acc:HGNC:265]	-	6	0	0.328895	0
ENSG00000163793	-5.69475	51.7954	0.0409646	0.845742	DNAJC5G	2	27275421	27281499	+	2350	protein_coding	DnaJ heat shock protein family (Hsp40) member C5 gamma [Source:HGNC Symbol;Acc:HGNC:24844]	-	0	6	0	0.130665
ENSG00000226034	-5.69475	51.7954	0.0409646	0.845742	NANOGNBP1	2	100660199	100660678	+	480	processed_pseudogene	NANOGNB pseudogene 1 [Source:HGNC Symbol;Acc:HGNC:42158]	-	0	6	0	0.639715
ENSG00000257277	-5.69475	51.7954	0.0409646	0.845742	AC092652.2	2	143676165	143741294	-	884	antisense	novel transcript, antisense to ARHGAP15	-	0	6	0	0.347357
ENSG00000223466	5.53904	46.4962	0.0409646	0.845742	LINC01825	2	195533035	195538681	+	850	lincRNA	long intergenic non-protein coding RNA 1825 [Source:HGNC Symbol;Acc:HGNC:52631]	-	6	0	0.325799	0
ENSG00000237990	5.53904	46.4962	0.0409646	0.845742	CNTN4-AS1	3	3039033	3069242	-	2078	antisense	CNTN4 antisense RNA 1 [Source:HGNC Symbol;Acc:HGNC:39985]	-	6	0	0.133267	0
ENSG00000163421	5.53904	46.4962	0.0409646	0.845742	PROK2	3	71771656	71785206	-	1612	protein_coding	prokineticin 2 [Source:HGNC Symbol;Acc:HGNC:18455]	-	6	0	0.171792	0
ENSG00000277143	-5.69475	51.7954	0.0409646	0.845742	AC074276.2	3	158336430	158336777	-	348	processed_pseudogene	leukocyte immunoglobulin-like receptor, subfamily B (with TM and ITIM domains), member 2 (LILRB2) pseudogene	-	0	6	0	0.882365
ENSG00000234427	5.53904	46.4962	0.0409646	0.845742	AL022724.1	6	11810602	11811248	+	554	lincRNA	novel transcript	-	6	0	0.499872	0
ENSG00000125363	-5.69475	51.7954	0.0409646	0.845742	AMELX	X	11293413	11300761	+	835	protein_coding	amelogenin X-linked [Source:HGNC Symbol;Acc:HGNC:461]	-	0	6	0	0.36774
ENSG00000276591	-5.69475	51.7954	0.0409646	0.845742	GXYLT1P5	9	42974855	42978320	+	1630	transcribed_processed_pseudogene	glucoside xylosyltransferase 1 pseudogene 5 [Source:HGNC Symbol;Acc:HGNC:50424]	-	0	6	0	0.188382
ENSG00000207277	5.53904	46.4962	0.0409646	0.845742	RNA5SP284	9	63813190	63813307	+	118	rRNA_pseudogene	RNA, 5S ribosomal pseudogene 284 [Source:HGNC Symbol;Acc:HGNC:43184]	-	6	0	2.34686	0
ENSG00000234156	-5.69475	51.7954	0.0409646	0.845742	AL162254.1	9	122609915	122639685	+	636	antisense	novel transcript	-	0	6	0	0.482804
ENSG00000255334	-5.69475	51.7954	0.0409646	0.845742	AP000907.2	11	112015307	112016124	+	322	sense_intronic	novel transcript	-	0	6	0	0.953612
ENSG00000283337	-5.69475	51.7954	0.0409646	0.845742	RF00026	10	102868421	102868519	+	99	snRNA		-	0	6	0	3.10165
ENSG00000279490	5.53904	46.4962	0.0409646	0.845742	AC109446.4	16	17082295	17085049	-	2755	TEC	novel transcript	-	6	0	0.100519	0
ENSG00000279300	-5.69475	51.7954	0.0409646	0.845742	AC008761.3	19	17622447	17623338	+	892	TEC	TEC	-	0	6	0	0.344241
ENSG00000275139	-5.69475	51.7954	0.0409646	0.845742	AL133492.1	21	45759804	45763758	-	3955	antisense	novel transcript, antisense to PCBP3	-	0	6	0	0.0776392
ENSG00000142675	-1.37165	2.58766	0.0409935	0.845742	CNKSR1	1	26177403	26189886	+	4043	protein_coding	connector enhancer of kinase suppressor of Ras 1 [Source:HGNC Symbol;Acc:HGNC:19700]	-	12	28	0.136992	0.35443
ENSG00000187045	-1.37165	2.58766	0.0409935	0.845742	TMPRSS6	22	37065436	37109713	-	4232	protein_coding	transmembrane serine protease 6 [Source:HGNC Symbol;Acc:HGNC:16517]	-	12	28	0.130874	0.338601
ENSG00000280067	-1.37165	2.58766	0.0409935	0.845742	AC023818.1	16	48343755	48346058	-	2304	TEC	novel transcript	-	12	28	0.24039	0.621945
ENSG00000162188	1.4625	2.75585	0.0409935	0.845742	GNG3	11	62707658	62709201	+	882	protein_coding	G protein subunit gamma 3 [Source:HGNC Symbol;Acc:HGNC:4405]	-	31	10	1.62222	0.58024
ENSG00000232065	2.35899	5.13012	0.041032	0.845742	LINC01063	3	196631498	196632587	-	348	antisense	long intergenic non-protein coding RNA 1063 [Source:HGNC Symbol;Acc:HGNC:49092]	-	12	2	1.59155	0.294122
ENSG00000230306	2.35899	5.13012	0.041032	0.845742	BANF1P2	10	133344643	133344906	-	264	processed_pseudogene	barrier to autointegration factor 1 pseudogene 2 [Source:HGNC Symbol;Acc:HGNC:23426]	-	12	2	2.09795	0.387706
ENSG00000225125	2.35899	5.13012	0.041032	0.845742	RANP4	X	136807223	136807877	-	655	processed_pseudogene	RAN, member RAS oncogene family pseudogene 4 [Source:HGNC Symbol;Acc:HGNC:39859]	-	12	2	0.845586	0.156266
ENSG00000258569	2.35899	5.13012	0.041032	0.845742	AC007376.2	14	76710658	76761388	-	540	lincRNA	novel transcript	-	12	2	1.02566	0.189545
ENSG00000254507	2.35899	5.13012	0.041032	0.845742	DEFB131E	8	12003400	12004082	-	683	transcribed_processed_pseudogene	defensin beta 131E (pseudogene) [Source:HGNC Symbol;Acc:HGNC:39765]	-	12	2	0.810921	0.14986
ENSG00000234336	2.35899	5.13012	0.041032	0.845742	JAZF1-AS1	7	28180322	28243917	+	4092	antisense	JAZF1 antisense RNA 1 [Source:HGNC Symbol;Acc:HGNC:41218]	-	12	2	0.135352	0.0250133
ENSG00000211955	2.35899	5.13012	0.041032	0.845742	IGHV3-33	14	106359793	106360324	-	431	IG_V_gene	immunoglobulin heavy variable 3-33 [Source:HGNC Symbol;Acc:HGNC:5596]	-	12	2	1.28506	0.237481
ENSG00000197191	-1.05233	2.07387	0.0411988	0.847776	CYSRT1	9	137224635	137226311	+	1297	protein_coding	cysteine rich tail 1 [Source:HGNC Symbol;Acc:HGNC:30529]	-	43	80	1.53019	3.15665
ENSG00000105717	1.02915	2.04082	0.0411988	0.847776	PBX4	19	19561707	19618916	-	2554	protein_coding	PBX homeobox 4 [Source:HGNC Symbol;Acc:HGNC:13403]	Homeobox	89	39	1.60837	0.781484
ENSG00000177301	1.09655	2.13842	0.041364	0.850472	KCNA2	1	110519837	110631474	-	17379	protein_coding	potassium voltage-gated channel subfamily A member 2 [Source:HGNC Symbol;Acc:HGNC:6220]	-	67	28	0.177938	0.0824536
ENSG00000232775	-1.0497	2.0701	0.0418972	0.857327	BMS1P22	22	15805263	15820884	-	1572	transcribed_unprocessed_pseudogene	BMS1, ribosome biogenesis factor pseudogene 22 [Source:HGNC Symbol;Acc:HGNC:51603]	-	42	78	1.23315	2.53933
ENSG00000027869	1.46645	2.7634	0.041904	0.857327	SH2D2A	1	156806243	156816862	-	2512	protein_coding	SH2 domain containing 2A [Source:HGNC Symbol;Acc:HGNC:10821]	-	28	9	0.514465	0.183358
ENSG00000102387	1.46645	2.7634	0.041904	0.857327	TAF7L	X	101268253	101293057	-	2714	protein_coding	TATA-box binding protein associated factor 7 like [Source:HGNC Symbol;Acc:HGNC:11548]	-	28	9	0.476174	0.169711
ENSG00000277156	1.10515	2.15122	0.0422141	0.862962	AL589743.5	14	19267115	19268164	+	1050	processed_pseudogene	translocase of outer mitochondrial membrane 40 homolog (yeast) (TOMM40) pseudogene	-	65	27	2.85721	1.31598
ENSG00000203739	-1.2309	2.34714	0.0425719	0.867746	AL645568.1	1	173417793	173461362	-	2282	antisense	uncharacterized LOC101928673 [Source:NCBI gene;Acc:101928673]	-	18	38	0.364061	0.852206
ENSG00000263412	-1.2309	2.34714	0.0425719	0.867746	AC004477.1	17	48045141	48048073	-	2933	processed_transcript	novel transcript, antisense to NFE2L1	-	18	38	0.283255	0.663053
ENSG00000197748	-1.2309	2.34714	0.0425719	0.867746	CFAP43	10	104129888	104232362	-	7184	protein_coding	cilia and flagella associated protein 43 [Source:HGNC Symbol;Acc:HGNC:26684]	-	18	38	0.115644	0.270703
ENSG00000188338	1.00213	2.00296	0.0426745	0.867764	SLC38A3	3	50205246	50221486	+	3968	protein_coding	solute carrier family 38 member 3 [Source:HGNC Symbol;Acc:HGNC:18044]	-	103	46	1.19807	0.593284
ENSG00000112245	-1.41017	2.65768	0.0428142	0.867764	PTP4A1	6	63521746	63583377	+	5281	protein_coding	protein tyrosine phosphatase type IVA, member 1 [Source:HGNC Symbol;Acc:HGNC:9634]	-	10	24	0.087398	0.23258
ENSG00000227741	-1.41017	2.65768	0.0428142	0.867764	AL121987.2	1	160202199	160208869	-	1578	antisense	uncharacterized LOC729867 [Source:NCBI gene;Acc:729867]	-	10	24	0.29249	0.77836
ENSG00000250474	1.52764	2.88314	0.0428142	0.867764	WBP1LP2	7	107628553	107629550	+	998	processed_pseudogene	WW domain binding protein 1-like pseudogene 2 [Source:HGNC Symbol;Acc:HGNC:43949]	-	26	8	1.20243	0.410238
ENSG00000261888	1.00551	2.00765	0.0433388	0.868235	AC144831.1	17	83104255	83106910	+	2656	lincRNA	novel transcript	-	101	45	1.75514	0.867083
ENSG00000260276	-1.18535	2.27419	0.0436398	0.868235	AC022167.2	16	8848105	8860456	+	2642	antisense	novel transcript, antisense to CARHSP1	-	23	47	0.401803	0.910419
ENSG00000261126	-1.18535	2.27419	0.0436398	0.868235	RBFADN	18	80046900	80095482	+	6623	lincRNA	RBFA downstream neighbor [Source:HGNC Symbol;Acc:HGNC:48591]	-	23	47	0.160284	0.363178
ENSG00000273891	-1.23499	2.3538	0.0436842	0.868235	AL731566.1	10	121965764	121967700	+	1937	antisense	novel transcript, antisense to NSMCE4A	-	17	36	0.405076	0.951151
ENSG00000223396	1.60242	3.03652	0.043693	0.868235	RPS10P7	1	201518703	201584367	+	3018	transcribed_processed_pseudogene	ribosomal protein S10 pseudogene 7 [Source:HGNC Symbol;Acc:HGNC:36423]	-	24	7	0.367037	0.118701
ENSG00000240875	-1.4352	2.70419	0.043693	0.868235	LINC00886	3	156747346	156817062	-	3822	lincRNA	long intergenic non-protein coding RNA 886 [Source:HGNC Symbol;Acc:HGNC:48572]	-	9	22	0.108685	0.294584
ENSG00000197980	1.60242	3.03652	0.043693	0.868235	LEKR1	3	156825481	157046129	+	5602	protein_coding	leucine, glutamate and lysine rich 1 [Source:HGNC Symbol;Acc:HGNC:33765]	-	24	7	0.197736	0.0639487
ENSG00000282911	1.60242	3.03652	0.043693	0.868235	DUX4L35	20	29448517	29449306	-	790	unprocessed_pseudogene	double homeobox 4 like 35 (pseudogene) [Source:HGNC Symbol;Acc:HGNC:51773]	-	24	7	1.40217	0.453469
ENSG00000261587	-1.4352	2.70419	0.043693	0.868235	TMEM249	8	144352219	144354914	-	2234	protein_coding	transmembrane protein 249 [Source:HGNC Symbol;Acc:HGNC:44155]	-	9	22	0.185942	0.503983
ENSG00000228222	1.60242	3.03652	0.043693	0.868235	AC073050.1	2	167293171	167558333	+	462	lincRNA	novel transcript (hCG1660379)	-	24	7	2.39766	0.775412
ENSG00000113749	1.60242	3.03652	0.043693	0.868235	HRH2	5	175658030	175710756	+	5679	protein_coding	histamine receptor H2 [Source:HGNC Symbol;Acc:HGNC:5183]	-	24	7	0.195055	0.0630816
ENSG00000163864	-2.11102	4.31996	0.0439913	0.868235	NMNAT3	3	139560180	139678017	-	12983	protein_coding	nicotinamide nucleotide adenylyltransferase 3 [Source:HGNC Symbol;Acc:HGNC:20989]	-	3	12	0.0106651	0.0473023
ENSG00000152910	2.02125	4.05936	0.0439913	0.868235	CNTNAP4	16	76277278	76559238	+	6482	protein_coding	contactin associated protein like 4 [Source:HGNC Symbol;Acc:HGNC:18747]	-	14	3	0.0996866	0.0236858
ENSG00000213569	2.02125	4.05936	0.0439913	0.868235	AL390039.1	X	107131659	107132269	+	611	processed_pseudogene	general transcription factor IIIC, polypeptide 6, alpha 35kDa (GTF3C6) pseudogene	-	14	3	1.05756	0.251279
ENSG00000271367	2.02125	4.05936	0.0439913	0.868235	AL034374.1	6	53350158	53350705	+	548	lincRNA	novel transcript	-	14	3	1.17914	0.280167
ENSG00000277728	-2.11102	4.31996	0.0439913	0.868235	AC097641.2	17	73202968	73203431	-	464	antisense	novel transcript, antisense to COG1	-	3	12	0.298415	1.32355
ENSG00000130176	-2.11102	4.31996	0.0439913	0.868235	CNN1	19	11538717	11550323	+	2887	protein_coding	calponin 1 [Source:HGNC Symbol;Acc:HGNC:2155]	-	3	12	0.0479614	0.212721
ENSG00000249931	-2.11102	4.31996	0.0439913	0.868235	GOLGA8K	15	32392782	32403292	-	3231	protein_coding	golgin A8 family member K [Source:HGNC Symbol;Acc:HGNC:38652]	-	3	12	0.0428551	0.190073
ENSG00000225419	-2.11102	4.31996	0.0439913	0.868235	RPL21P3	20	18485265	18486052	+	478	processed_pseudogene	ribosomal protein L21 pseudogene 3 [Source:HGNC Symbol;Acc:HGNC:16533]	-	3	12	0.289675	1.28478
ENSG00000236296	2.02125	4.05936	0.0439913	0.868235	GUSBP5	4	143559472	143561460	+	1989	transcribed_processed_pseudogene	glucuronidase, beta pseudogene 5 [Source:HGNC Symbol;Acc:HGNC:42319]	-	14	3	0.324871	0.0771903
ENSG00000237693	-2.11102	4.31996	0.0439913	0.868235	IRGM	5	150846523	150900736	+	2271	protein_coding	immunity related GTPase M [Source:HGNC Symbol;Acc:HGNC:29597]	-	3	12	0.0609708	0.270421
ENSG00000237916	-2.11102	4.31996	0.0439913	0.868235	AC011753.4	2	109552536	109552846	+	311	processed_pseudogene	ribosomal protein L37 (RPL37) pseudogene	-	3	12	0.445224	1.97468
ENSG00000112333	2.02125	4.05936	0.0439913	0.868235	NR2E1	6	108166058	108188809	+	3733	protein_coding	nuclear receptor subfamily 2 group E member 1 [Source:HGNC Symbol;Acc:HGNC:7973]	RXR-like	14	3	0.173096	0.0411282
ENSG00000276791	-1.46579	2.76214	0.0444891	0.868235	AC092117.1	16	2777319	2780568	+	3250	lincRNA	novel transcript	-	8	20	0.113612	0.314937
ENSG00000280149	-1.65509	3.14944	0.0444891	0.868235	AC004877.2	7	149851572	149852170	+	599	TEC	TEC	-	7	20	0.539373	1.70875
ENSG00000155749	-1.65509	3.14944	0.0444891	0.868235	ALS2CR12	2	201288271	201357398	-	2635	protein_coding	amyotrophic lateral sclerosis 2 chromosome region 12 [Source:HGNC Symbol;Acc:HGNC:14439]	-	7	20	0.122613	0.388442
ENSG00000188761	-1.46579	2.76214	0.0444891	0.868235	BCL2L15	1	113878168	113887547	-	7709	protein_coding	BCL2 like 15 [Source:HGNC Symbol;Acc:HGNC:33624]	-	8	20	0.0478972	0.132773
ENSG00000249839	-1.23958	2.36129	0.044879	0.868235	AC011330.1	15	43663654	43684339	-	3235	unprocessed_pseudogene	histidine acid phosphatase domain containing 2A (HISPPD2A) pseudogene	-	16	34	0.228278	0.537875
ENSG00000232531	-1.07595	2.10811	0.0451174	0.868235	AC027612.3	2	91747940	91748986	-	1047	processed_pseudogene	SET domain containing (lysine methyltransferase) 8 (SETD8) pseudogene	-	28	53	1.23432	2.59063
ENSG00000152894	1.55937	2.94725	0.0451175	0.868235	PTPRK	6	127968779	128520674	-	9000	protein_coding	protein tyrosine phosphatase, receptor type K [Source:HGNC Symbol;Acc:HGNC:9674]	-	20	6	0.102566	0.0341181
ENSG00000160321	-1.72198	3.2989	0.0451175	0.868235	ZNF208	19	21932958	22010949	-	6867	protein_coding	zinc finger protein 208 [Source:HGNC Symbol;Acc:HGNC:12999]	zf-C2H2	6	18	0.0403276	0.134147
ENSG00000227908	-1.72198	3.2989	0.0451175	0.868235	FLJ31104	5	55995167	56003649	+	2289	antisense	uncharacterized LOC441072 [Source:NCBI gene;Acc:441072]	-	6	18	0.120983	0.402442
ENSG00000231721	-1.72198	3.2989	0.0451175	0.868235	LINC-PINT	7	130938963	131110176	-	9030	processed_transcript	long intergenic non-protein coding RNA, p53 induced transcript [Source:HGNC Symbol;Acc:HGNC:26885]	-	6	18	0.0306677	0.102014
ENSG00000142513	-1.72198	3.2989	0.0451175	0.868235	ACP4	19	50790415	50795224	+	1347	protein_coding	acid phosphatase 4 [Source:HGNC Symbol;Acc:HGNC:14376]	-	6	18	0.20559	0.683882
ENSG00000274825	-1.72198	3.2989	0.0451175	0.868235	AL023803.2	20	38955910	38956547	+	638	lincRNA	novel transcript	-	6	18	0.434059	1.44387
ENSG00000253931	-1.72198	3.2989	0.0451175	0.868235	AC105118.1	8	143412749	143417054	+	544	antisense	novel transcript	-	6	18	0.509061	1.69336
ENSG00000226944	-1.72198	3.2989	0.0451175	0.868235	AL031847.1	1	6204840	6205780	-	378	antisense	uncharacterized LOC102724450 [Source:NCBI gene;Acc:102724450]	-	6	18	0.732617	2.43701
ENSG00000248557	-1.72198	3.2989	0.0451175	0.868235	AC024558.1	3	126624792	126626061	+	528	processed_pseudogene	methyltransferase like 5 (METTL5) pseudogene	-	6	18	0.524487	1.74468
ENSG00000279693	-1.72198	3.2989	0.0451175	0.868235	AC099521.2	16	68367325	68370262	-	2938	TEC	novel transcript	-	6	18	0.0942578	0.313543
ENSG00000261019	-1.72198	3.2989	0.0451175	0.868235	AC010132.4	7	42901272	42902639	-	1368	lincRNA	novel transcript	-	6	18	0.202434	0.673384
ENSG00000158270	1.8109	3.50862	0.0452022	0.868235	COLEC12	18	316740	500722	-	7340	protein_coding	collectin subfamily member 12 [Source:HGNC Symbol;Acc:HGNC:16016]	-	16	4	0.10061	0.0278895
ENSG00000137880	-1.93163	3.81486	0.0452022	0.868235	GCHFR	15	40764020	40767710	+	1531	protein_coding	GTP cyclohydrolase I feedback regulator [Source:HGNC Symbol;Acc:HGNC:4194]	-	4	14	0.120588	0.467982
ENSG00000257594	-1.93163	3.81486	0.0452022	0.868235	GALNT4	12	89519408	89524806	-	5399	protein_coding	polypeptide N-acetylgalactosaminyltransferase 4 [Source:HGNC Symbol;Acc:HGNC:4126]	-	4	14	0.0341951	0.132706
ENSG00000240970	-1.93163	3.81486	0.0452022	0.868235	RPL23AP64	11	119003012	119003446	-	435	processed_pseudogene	ribosomal protein L23a pseudogene 64 [Source:HGNC Symbol;Acc:HGNC:36552]	-	4	14	0.424413	1.64708
ENSG00000201512	-1.93163	3.81486	0.0452022	0.868235	SNORA71C	20	38429670	38429803	-	134	snoRNA	small nucleolar RNA, H/ACA box 71C [Source:HGNC Symbol;Acc:HGNC:32656]	-	4	14	1.37776	5.34687
ENSG00000231609	-1.93163	3.81486	0.0452022	0.868235	AC007098.1	2	62957326	63048640	-	2675	antisense	uncharacterized LOC100132215 [Source:NCBI gene;Acc:100132215]	-	4	14	0.0690167	0.267843
ENSG00000213204	-1.93163	3.81486	0.0452022	0.868235	AL049697.1	6	87408012	87511634	+	3530	protein_coding	novel transcript, C6orf165-SLC35A1 readthrough	-	4	14	0.0523002	0.202969
ENSG00000275227	-1.93163	3.81486	0.0452022	0.868235	RF02271	3	25618132	25618312	-	181	misc_RNA		-	4	14	1.02	3.95846
ENSG00000279339	-1.93163	3.81486	0.0452022	0.868235	AC100788.2	17	78897264	78900152	+	2889	TEC	TEC	-	4	14	0.0639043	0.248003
ENSG00000259946	-1.93163	3.81486	0.0452022	0.868235	BX005019.1	1	97967005	97968814	-	1810	lincRNA	novel transcript	-	4	14	0.102	0.395846
ENSG00000187642	-1.81008	3.50661	0.045436	0.868235	PERM1	1	975204	982093	-	3424	protein_coding	PPARGC1 and ESRR induced regulator, muscle 1 [Source:HGNC Symbol;Acc:HGNC:28208]	-	5	16	0.0673991	0.239146
ENSG00000018280	1.66589	3.17309	0.045436	0.868235	SLC11A1	2	218382029	218396894	+	8676	protein_coding	solute carrier family 11 member 1 [Source:HGNC Symbol;Acc:HGNC:10907]	-	18	5	0.095757	0.0294935
ENSG00000279406	1.66589	3.17309	0.045436	0.868235	AL359183.1	10	71364243	71366374	+	2132	TEC	TEC	-	18	5	0.389675	0.120022
ENSG00000264107	1.66589	3.17309	0.045436	0.868235	AC138207.2	17	31090787	31095450	-	492	antisense	novel transcript, antisense to NF1	-	18	5	1.68859	0.520093
ENSG00000276302	1.66589	3.17309	0.045436	0.868235	AL021997.3	6	28267121	28281580	+	557	protein_coding	novel protein	-	18	5	1.49154	0.4594
ENSG00000258789	-1.81008	3.50661	0.045436	0.868235	AL162171.1	14	88551597	88552493	+	718	antisense	novel transcript, antisense to PTPN21	-	5	16	0.321413	1.14044
ENSG00000176761	-1.81008	3.50661	0.045436	0.868235	ZNF285B	19	44467641	44473227	+	1767	unprocessed_pseudogene	zinc finger protein 285B (pseudogene) [Source:HGNC Symbol;Acc:HGNC:33262]	-	5	16	0.130602	0.463404
ENSG00000249307	1.66589	3.17309	0.045436	0.868235	LINC01088	4	78971748	79308798	+	3995	antisense	long intergenic non-protein coding RNA 1088 [Source:HGNC Symbol;Acc:HGNC:49148]	-	18	5	0.207957	0.0640516
ENSG00000228914	-1.81008	3.50661	0.045436	0.868235	OR1H1P	9	122607864	122608800	+	937	unprocessed_pseudogene	olfactory receptor family 1 subfamily H member 1 pseudogene [Source:HGNC Symbol;Acc:HGNC:8206]	-	5	16	0.246291	0.87389
ENSG00000167608	-1.24475	2.36977	0.0461633	0.875415	TMC4	19	54160108	54173250	-	3062	protein_coding	transmembrane channel like 4 [Source:HGNC Symbol;Acc:HGNC:22998]	-	15	32	0.226102	0.534837
ENSG00000176563	-1.24475	2.36977	0.0461633	0.875415	CNTD1	17	42798792	42811587	+	3378	protein_coding	cyclin N-terminal domain containing 1 [Source:HGNC Symbol;Acc:HGNC:26847]	-	15	32	0.204951	0.484805
ENSG00000197580	-1.24475	2.36977	0.0461633	0.875415	BCO2	11	112175467	112224699	+	6789	protein_coding	beta-carotene oxygenase 2 [Source:HGNC Symbol;Acc:HGNC:18503]	-	15	32	0.101977	0.241224
ENSG00000274370	-1.24475	2.36977	0.0461633	0.875415	AC130371.2	17	83098377	83098987	+	611	lincRNA	novel transcript	-	15	32	1.1331	2.68031
ENSG00000266405	1.15776	2.23111	0.0472123	0.892588	CBX3P2	18	2652170	2655395	-	1429	transcribed_processed_pseudogene	chromobox 3 pseudogene 2 [Source:NCBI gene;Acc:645158]	-	45	18	1.45344	0.644639
ENSG00000198870	-1.12569	2.18206	0.0474097	0.89283	STKLD1	9	133376367	133406096	+	4408	protein_coding	serine/threonine kinase like domain containing 1 [Source:HGNC Symbol;Acc:HGNC:28669]	-	25	49	0.261768	0.568893
ENSG00000265018	-1.12569	2.18206	0.0474097	0.89283	AGAP12P	10	48009873	48031640	-	2400	transcribed_unprocessed_pseudogene	ArfGAP with GTPase domain, ankyrin repeat and PH domain 12, pseudogene [Source:HGNC Symbol;Acc:HGNC:23661]	-	25	49	0.48078	1.04487
ENSG00000049283	1.335	2.52276	0.0475441	0.89283	EPN3	17	50532543	50543750	+	4642	protein_coding	epsin 3 [Source:HGNC Symbol;Acc:HGNC:18235]	-	34	12	0.338058	0.132298
ENSG00000102385	-1.25063	2.37945	0.0475441	0.89283	DRP2	X	101219769	101264497	+	8187	protein_coding	dystrophin related protein 2 [Source:HGNC Symbol;Acc:HGNC:3032]	-	14	30	0.0789262	0.187531
ENSG00000248161	-1.25063	2.37945	0.0475441	0.89283	AC098487.1	4	102418602	102450010	-	992	lincRNA	novel transcript	-	14	30	0.65138	1.5477
ENSG00000279912	-1.25063	2.37945	0.0475441	0.89283	AC068448.1	15	32182551	32186475	+	3925	TEC	TEC	-	14	30	0.164629	0.391163
ENSG00000242686	-1.25063	2.37945	0.0475441	0.89283	AC107464.1	4	652850	656213	-	2353	antisense	uncharacterized LOC101928521 [Source:NCBI gene;Acc:101928521]	-	14	30	0.274615	0.652493
ENSG00000180929	-1.19081	2.28281	0.0485971	0.909106	GPR62	3	51955314	51957504	+	2191	protein_coding	G protein-coupled receptor 62 [Source:HGNC Symbol;Acc:HGNC:13301]	-	19	39	0.400248	0.910959
ENSG00000117525	-1.01586	2.0221	0.0490247	0.91101	F3	1	94529225	94541800	-	2875	protein_coding	coagulation factor III, tissue factor [Source:HGNC Symbol;Acc:HGNC:3541]	-	43	78	0.690317	1.38846
ENSG00000279789	-1.01586	2.0221	0.0490247	0.91101	AC120114.3	16	29913144	29915337	-	2194	TEC	novel transcript, sense intronic to KCTD13	-	43	78	0.904585	1.81943
ENSG00000085465	-1.3078	2.47563	0.0490282	0.91101	OVGP1	1	111414314	111427777	-	2567	protein_coding	oviductal glycoprotein 1 [Source:HGNC Symbol;Acc:HGNC:8524]	-	13	29	0.233741	0.578161
ENSG00000188051	1.37214	2.58854	0.0490282	0.91101	TMEM221	19	17435509	17448567	-	2317	protein_coding	transmembrane protein 221 [Source:HGNC Symbol;Acc:HGNC:21943]	-	32	11	0.637443	0.242965
ENSG00000179855	1.37214	2.58854	0.0490282	0.91101	GIPC3	19	3585553	3593541	+	4348	protein_coding	GIPC PDZ domain containing family member 3 [Source:HGNC Symbol;Acc:HGNC:18183]	-	32	11	0.339686	0.129473
ENSG00000225472	-1.3078	2.47563	0.0490282	0.91101	AL136366.1	9	14317085	14357908	+	1054	antisense	novel transcript	-	13	29	0.569273	1.4081
ENSG00000239268	1.06049	2.08563	0.0491311	0.912241	AC092691.1	3	117672154	117997592	-	554	lincRNA	novel transcript	-	70	30	5.83185	2.77133
