# Supplementary material for: Culture of Cancer Cells at Physiological Oxygen Levels Affects Gene Expression in a Cell-Type Specific Manner
Source: Preprints.org preprint supplement (doi:10.20944/preprints202208.0497.v1), 2022-08-29
Supplement: Supplementary file 9 [file Table S5 Functional Enrichent LNCaP 5% O2.xlsx]

## Sheet: GO
Category	Term	ID	Name	Count	%	PValue	Genes	List Total	Pop Hits	Pop Total	Fold Enrichment	Benjamini padj
GO TERM: MF	GO:0046982~protein heterodimerization activity	GO:0046982	protein heterodimerization activity	10	2.7933	0.00342678	ENSG00000175197, ENSG00000276966, ENSG00000277075, ENSG00000120669, ENSG00000273802, ENSG00000125775, ENSG00000274290, ENSG00000162772, ENSG00000203814, ENSG00000196747	138	370	16739	3.2783	0.445281
GO TERM: MF	GO:0003677~DNA binding	GO:0003677	DNA binding	34	9.49721	0.00488846	ENSG00000029639, ENSG00000277075, ENSG00000267508, ENSG00000083814, ENSG00000229676, ENSG00000196747, ENSG00000196109, ENSG00000166432, ENSG00000172748, ENSG00000228049, ENSG00000276966, ENSG00000081665, ENSG00000120075, ENSG00000162772, ENSG00000018869, ENSG00000187815, ENSG00000175197, ENSG00000196172, ENSG00000274290, ENSG00000170954, ENSG00000196605, ENSG00000138380, ENSG00000124107, ENSG0000…	138	2573	16739	1.60284	0.445281
GO TERM: MF	GO:0033293~monocarboxylic acid binding	GO:0033293	monocarboxylic acid binding	5	1.39665	0.00521193	ENSG00000184925, ENSG00000171903, ENSG00000130208, ENSG00000170231, ENSG00000143320	138	85	16739	7.13512	0.445281
GO TERM: MF	GO:0000977~RNA polymerase II regulatory region sequence-specific DNA binding	GO:0000977	RNA polymerase II regulatory region sequence-specific DNA binding	22	6.14525	0.00691857	ENSG00000175197, ENSG00000196172, ENSG00000267508, ENSG00000083814, ENSG00000229676, ENSG00000196109, ENSG00000170954, ENSG00000196605, ENSG00000172748, ENSG00000138380, ENSG00000081665, ENSG00000158691, ENSG00000102878, ENSG00000120669, ENSG00000120075, ENSG00000186777, ENSG00000160321, ENSG00000125398, ENSG00000018869, ENSG00000162772, ENSG00000187815, ENSG00000149922	138	1445	16739	1.84674	0.445281
GO TERM: MF	GO:0001012~RNA polymerase II regulatory region DNA binding	GO:0001012	RNA polymerase II regulatory region DNA binding	22	6.14525	0.00691857	ENSG00000175197, ENSG00000196172, ENSG00000267508, ENSG00000083814, ENSG00000229676, ENSG00000196109, ENSG00000170954, ENSG00000196605, ENSG00000172748, ENSG00000138380, ENSG00000081665, ENSG00000158691, ENSG00000102878, ENSG00000120669, ENSG00000120075, ENSG00000186777, ENSG00000160321, ENSG00000125398, ENSG00000018869, ENSG00000162772, ENSG00000187815, ENSG00000149922	138	1445	16739	1.84674	0.445281
GO TERM: MF	GO:0008138~protein tyrosine/serine/threonine phosphatase activity	GO:0008138	protein tyrosine/serine/threonine phosphatase activity	4	1.11732	0.00709027	ENSG00000120875, ENSG00000138166, ENSG00000149599, ENSG00000162999	138	48	16739	10.1081	0.445281
GO TERM: MF	GO:0003700~transcription factor activity, sequence-specific DNA binding	GO:0003700	transcription factor activity, sequence-specific DNA binding	22	6.14525	0.00787016	ENSG00000175197, ENSG00000196172, ENSG00000267508, ENSG00000083814, ENSG00000229676, ENSG00000196109, ENSG00000170954, ENSG00000196605, ENSG00000172748, ENSG00000138380, ENSG00000081665, ENSG00000158691, ENSG00000102878, ENSG00000120669, ENSG00000120075, ENSG00000186777, ENSG00000160321, ENSG00000125398, ENSG00000018869, ENSG00000162772, ENSG00000187815, ENSG00000149922	138	1462	16739	1.82526	0.445281
GO TERM: MF	GO:0001071~nucleic acid binding transcription factor activity	GO:0001071	nucleic acid binding transcription factor activity	22	6.14525	0.00787016	ENSG00000175197, ENSG00000196172, ENSG00000267508, ENSG00000083814, ENSG00000229676, ENSG00000196109, ENSG00000170954, ENSG00000196605, ENSG00000172748, ENSG00000138380, ENSG00000081665, ENSG00000158691, ENSG00000102878, ENSG00000120669, ENSG00000120075, ENSG00000186777, ENSG00000160321, ENSG00000125398, ENSG00000018869, ENSG00000162772, ENSG00000187815, ENSG00000149922	138	1462	16739	1.82526	0.445281
GO TERM: MF	GO:0005504~fatty acid binding	GO:0005504	fatty acid binding	4	1.11732	0.00932318	ENSG00000171903, ENSG00000130208, ENSG00000170231, ENSG00000143320	138	53	16739	9.1545	0.445281
GO TERM: MF	GO:0000981~RNA polymerase II transcription factor activity, sequence-specific DNA binding	GO:0000981	RNA polymerase II transcription factor activity, sequence-specific DNA binding	21	5.86592	0.0108098	ENSG00000175197, ENSG00000196172, ENSG00000267508, ENSG00000229676, ENSG00000196109, ENSG00000170954, ENSG00000196605, ENSG00000172748, ENSG00000138380, ENSG00000081665, ENSG00000158691, ENSG00000102878, ENSG00000120669, ENSG00000120075, ENSG00000186777, ENSG00000160321, ENSG00000125398, ENSG00000018869, ENSG00000162772, ENSG00000187815, ENSG00000149922	138	1410	16739	1.80655	0.445281
GO TERM: MF	GO:1990837~sequence-specific double-stranded DNA binding	GO:1990837	sequence-specific double-stranded DNA binding	23	6.42458	0.0117195	ENSG00000175197, ENSG00000196172, ENSG00000267508, ENSG00000083814, ENSG00000229676, ENSG00000196109, ENSG00000170954, ENSG00000196605, ENSG00000172748, ENSG00000138380, ENSG00000081665, ENSG00000158691, ENSG00000102878, ENSG00000120669, ENSG00000120075, ENSG00000186777, ENSG00000160321, ENSG00000178460, ENSG00000125398, ENSG00000018869, ENSG00000162772, ENSG00000187815, ENSG00000149922	138	1614	16739	1.72852	0.445281
GO TERM: MF	GO:0043565~sequence-specific DNA binding	GO:0043565	sequence-specific DNA binding	24	6.70391	0.0124483	ENSG00000175197, ENSG00000196172, ENSG00000267508, ENSG00000083814, ENSG00000229676, ENSG00000196109, ENSG00000170954, ENSG00000196605, ENSG00000172748, ENSG00000138380, ENSG00000081665, ENSG00000078487, ENSG00000158691, ENSG00000102878, ENSG00000120669, ENSG00000120075, ENSG00000186777, ENSG00000160321, ENSG00000178460, ENSG00000125398, ENSG00000018869, ENSG00000162772, ENSG00000187815, ENSG0000…	138	1721	16739	1.69153	0.445281
GO TERM: MF	GO:0000976~transcription regulatory region sequence-specific DNA binding	GO:0000976	transcription regulatory region sequence-specific DNA binding	22	6.14525	0.01437	ENSG00000175197, ENSG00000196172, ENSG00000267508, ENSG00000083814, ENSG00000229676, ENSG00000196109, ENSG00000170954, ENSG00000196605, ENSG00000172748, ENSG00000138380, ENSG00000081665, ENSG00000158691, ENSG00000102878, ENSG00000120669, ENSG00000120075, ENSG00000186777, ENSG00000160321, ENSG00000125398, ENSG00000018869, ENSG00000162772, ENSG00000187815, ENSG00000149922	138	1547	16739	1.72497	0.445281
GO TERM: MF	GO:0000975~regulatory region DNA binding	GO:0000975	regulatory region DNA binding	22	6.14525	0.0150554	ENSG00000175197, ENSG00000196172, ENSG00000267508, ENSG00000083814, ENSG00000229676, ENSG00000196109, ENSG00000170954, ENSG00000196605, ENSG00000172748, ENSG00000138380, ENSG00000081665, ENSG00000158691, ENSG00000102878, ENSG00000120669, ENSG00000120075, ENSG00000186777, ENSG00000160321, ENSG00000125398, ENSG00000018869, ENSG00000162772, ENSG00000187815, ENSG00000149922	138	1554	16739	1.7172	0.445281
GO TERM: MF	GO:0044212~transcription regulatory region DNA binding	GO:0044212	transcription regulatory region DNA binding	22	6.14525	0.0150554	ENSG00000175197, ENSG00000196172, ENSG00000267508, ENSG00000083814, ENSG00000229676, ENSG00000196109, ENSG00000170954, ENSG00000196605, ENSG00000172748, ENSG00000138380, ENSG00000081665, ENSG00000158691, ENSG00000102878, ENSG00000120669, ENSG00000120075, ENSG00000186777, ENSG00000160321, ENSG00000125398, ENSG00000018869, ENSG00000162772, ENSG00000187815, ENSG00000149922	138	1554	16739	1.7172	0.445281
GO TERM: MF	GO:0001067~regulatory region nucleic acid binding	GO:0001067	regulatory region nucleic acid binding	22	6.14525	0.0152559	ENSG00000175197, ENSG00000196172, ENSG00000267508, ENSG00000083814, ENSG00000229676, ENSG00000196109, ENSG00000170954, ENSG00000196605, ENSG00000172748, ENSG00000138380, ENSG00000081665, ENSG00000158691, ENSG00000102878, ENSG00000120669, ENSG00000120075, ENSG00000186777, ENSG00000160321, ENSG00000125398, ENSG00000018869, ENSG00000162772, ENSG00000187815, ENSG00000149922	138	1556	16739	1.715	0.445281
GO TERM: MF	GO:0000978~RNA polymerase II core promoter proximal region sequence-specific DNA binding	GO:0000978	RNA polymerase II core promoter proximal region sequence-specific DNA binding	18	5.02793	0.0193736	ENSG00000175197, ENSG00000196172, ENSG00000267508, ENSG00000083814, ENSG00000229676, ENSG00000196109, ENSG00000170954, ENSG00000138380, ENSG00000081665, ENSG00000158691, ENSG00000102878, ENSG00000120669, ENSG00000120075, ENSG00000186777, ENSG00000160321, ENSG00000125398, ENSG00000162772, ENSG00000149922	138	1205	16739	1.81191	0.518022
GO TERM: MF	GO:0003690~double-stranded DNA binding	GO:0003690	double-stranded DNA binding	23	6.42458	0.021814	ENSG00000175197, ENSG00000196172, ENSG00000267508, ENSG00000083814, ENSG00000229676, ENSG00000196109, ENSG00000170954, ENSG00000196605, ENSG00000172748, ENSG00000138380, ENSG00000081665, ENSG00000158691, ENSG00000102878, ENSG00000120669, ENSG00000120075, ENSG00000186777, ENSG00000160321, ENSG00000178460, ENSG00000125398, ENSG00000018869, ENSG00000162772, ENSG00000187815, ENSG00000149922	138	1712	16739	1.62958	0.518022
GO TERM: MF	GO:0000987~core promoter proximal region sequence-specific DNA binding	GO:0000987	core promoter proximal region sequence-specific DNA binding	18	5.02793	0.0221851	ENSG00000175197, ENSG00000196172, ENSG00000267508, ENSG00000083814, ENSG00000229676, ENSG00000196109, ENSG00000170954, ENSG00000138380, ENSG00000081665, ENSG00000158691, ENSG00000102878, ENSG00000120669, ENSG00000120075, ENSG00000186777, ENSG00000160321, ENSG00000125398, ENSG00000162772, ENSG00000149922	138	1224	16739	1.78378	0.518022
GO TERM: MF	GO:0001159~core promoter proximal region DNA binding	GO:0001159	core promoter proximal region DNA binding	18	5.02793	0.0221851	ENSG00000175197, ENSG00000196172, ENSG00000267508, ENSG00000083814, ENSG00000229676, ENSG00000196109, ENSG00000170954, ENSG00000138380, ENSG00000081665, ENSG00000158691, ENSG00000102878, ENSG00000120669, ENSG00000120075, ENSG00000186777, ENSG00000160321, ENSG00000125398, ENSG00000162772, ENSG00000149922	138	1224	16739	1.78378	0.518022
GO TERM: CC	GO:0000137~Golgi cis cisterna	GO:0000137	Golgi cis cisterna	4	1.11732	0.00204861	ENSG00000238105, ENSG00000175265, ENSG00000103056, ENSG00000215252	147	30	17223	15.6218	0.522347
GO TERM: CC	GO:0031985~Golgi cisterna	GO:0031985	Golgi cisterna	6	1.67598	0.0041052	ENSG00000238105, ENSG00000117262, ENSG00000175265, ENSG00000171124, ENSG00000103056, ENSG00000215252	147	124	17223	5.66919	0.522347
GO TERM: CC	GO:0000786~nucleosome	GO:0000786	nucleosome	6	1.67598	0.00568375	ENSG00000276966, ENSG00000277075, ENSG00000273802, ENSG00000274290, ENSG00000203814, ENSG00000196747	147	134	17223	5.24612	0.522347
GO TERM: CC	GO:0044815~DNA packaging complex	GO:0044815	DNA packaging complex	6	1.67598	0.00722972	ENSG00000276966, ENSG00000277075, ENSG00000273802, ENSG00000274290, ENSG00000203814, ENSG00000196747	147	142	17223	4.95056	0.522347
GO TERM: CC	GO:0032580~Golgi cisterna membrane	GO:0032580	Golgi cisterna membrane	5	1.39665	0.00934256	ENSG00000238105, ENSG00000117262, ENSG00000175265, ENSG00000171124, ENSG00000215252	147	97	17223	6.03934	0.535522
GO TERM: CC	GO:0005795~Golgi stack	GO:0005795	Golgi stack	6	1.67598	0.0111796	ENSG00000238105, ENSG00000117262, ENSG00000175265, ENSG00000171124, ENSG00000103056, ENSG00000215252	147	158	17223	4.44924	0.535522
GO TERM: CC	GO:0032993~protein-DNA complex	GO:0032993	protein-DNA complex	7	1.95531	0.0148241	ENSG00000175197, ENSG00000276966, ENSG00000277075, ENSG00000273802, ENSG00000274290, ENSG00000203814, ENSG00000196747	147	234	17223	3.50488	0.535522
GO TERM: CC	GO:0031514~motile cilium	GO:0031514	motile cilium	7	1.95531	0.0148241	ENSG00000166762, ENSG00000137691, ENSG00000046651, ENSG00000156042, ENSG00000139537, ENSG00000204815, ENSG00000112981	147	234	17223	3.50488	0.535522
GO TERM: CC	GO:1990622~CHOP-ATF3 complex	GO:1990622	CHOP-ATF3 complex	2	0.558659	0.0168827	ENSG00000175197, ENSG00000162772	147	2	17223	117.163	0.542122
GO TERM: MF	GO:0030332~cyclin binding	GO:0030332	cyclin binding	3	0.837989	0.0314486	ENSG00000162755, ENSG00000143320, ENSG00000108465	138	34	16739	10.7027	0.667569
GO TERM: MF	GO:0051019~mitogen-activated protein kinase binding	GO:0051019	mitogen-activated protein kinase binding	3	0.837989	0.0314486	ENSG00000120875, ENSG00000138166, ENSG00000108465	138	34	16739	10.7027	0.667569
GO TERM: MF	GO:0005125~cytokine activity	GO:0005125	cytokine activity	6	1.67598	0.0461052	ENSG00000110944, ENSG00000112715, ENSG00000130513, ENSG00000124391, ENSG00000008517, ENSG00000169429	138	238	16739	3.05791	0.936137
GO TERM: BP	GO:0019730~antimicrobial humoral response	GO:0019730	antimicrobial humoral response	7	1.95531	0.0036907	ENSG00000124107, ENSG00000273802, ENSG00000148346, ENSG00000142515, ENSG00000274290, ENSG00000125788, ENSG00000169429	167	171	19277	4.72525	1
GO TERM: BP	GO:0003341~cilium movement	GO:0003341	cilium movement	5	1.39665	0.00440567	ENSG00000046651, ENSG00000156042, ENSG00000204815, ENSG00000165115, ENSG00000112981	167	77	19277	7.49553	1
GO TERM: BP	GO:0034976~response to endoplasmic reticulum stress	GO:0034976	response to endoplasmic reticulum stress	9	2.51397	0.00511036	ENSG00000175197, ENSG00000116761, ENSG00000141682, ENSG00000113739, ENSG00000174672, ENSG00000128965, ENSG00000162772, ENSG00000169429, ENSG00000108465	167	306	19277	3.39503	1
GO TERM: BP	GO:0030968~endoplasmic reticulum unfolded protein response	GO:0030968	endoplasmic reticulum unfolded protein response	6	1.67598	0.00555378	ENSG00000175197, ENSG00000116761, ENSG00000113739, ENSG00000162772, ENSG00000169429, ENSG00000108465	167	131	19277	5.28692	1
GO TERM: BP	GO:0006986~response to unfolded protein	GO:0006986	response to unfolded protein	7	1.95531	0.00658937	ENSG00000175197, ENSG00000116761, ENSG00000113739, ENSG00000128965, ENSG00000162772, ENSG00000169429, ENSG00000108465	167	193	19277	4.18662	1
GO TERM: BP	GO:0034620~cellular response to unfolded protein	GO:0034620	cellular response to unfolded protein	6	1.67598	0.0107851	ENSG00000175197, ENSG00000116761, ENSG00000113739, ENSG00000162772, ENSG00000169429, ENSG00000108465	167	154	19277	4.49732	1
GO TERM: BP	GO:0035966~response to topologically incorrect protein	GO:0035966	response to topologically incorrect protein	7	1.95531	0.010895	ENSG00000175197, ENSG00000116761, ENSG00000113739, ENSG00000128965, ENSG00000162772, ENSG00000169429, ENSG00000108465	167	215	19277	3.75822	1
GO TERM: BP	GO:0070059~intrinsic apoptotic signaling pathway in response to endoplasmic reticulum stress	GO:0070059	intrinsic apoptotic signaling pathway in response to endoplasmic reticulum stress	4	1.11732	0.0163663	ENSG00000175197, ENSG00000141682, ENSG00000174672, ENSG00000128965	167	62	19277	7.44717	1
GO TERM: BP	GO:0003351~epithelial cilium movement	GO:0003351	epithelial cilium movement	4	1.11732	0.00194382	ENSG00000046651, ENSG00000204815, ENSG00000165115, ENSG00000112981	167	29	19277	15.9215	1
GO TERM: BP	GO:0032774~RNA biosynthetic process	GO:0032774	RNA biosynthetic process	48	13.4078	0.0169035	ENSG00000157514, ENSG00000110944, ENSG00000029639, ENSG00000130513, ENSG00000277075, ENSG00000267508, ENSG00000134419, ENSG00000156384, ENSG00000083814, ENSG00000229676, ENSG00000006652, ENSG00000133169, ENSG00000244560, ENSG00000196747, ENSG00000196109, ENSG00000116761, ENSG00000172748, ENSG00000188243, ENSG00000203943, ENSG00000228049, ENSG00000276966, ENSG00000081665, ENSG00000120075, ENSG0000…	167	4074	19277	1.36001	1
GO TERM: BP	GO:0035967~cellular response to topologically incorrect protein	GO:0035967	cellular response to topologically incorrect protein	6	1.67598	0.0174791	ENSG00000175197, ENSG00000116761, ENSG00000113739, ENSG00000162772, ENSG00000169429, ENSG00000108465	167	174	19277	3.98038	1
GO TERM: BP	GO:0045912~negative regulation of carbohydrate metabolic process	GO:0045912	negative regulation of carbohydrate metabolic process	4	1.11732	0.0178072	ENSG00000173531, ENSG00000082196, ENSG00000168209, ENSG00000103056	167	64	19277	7.21445	1
GO TERM: BP	GO:0016070~RNA metabolic process	GO:0016070	RNA metabolic process	61	17.0391	0.0187708	ENSG00000157514, ENSG00000207062, ENSG00000110944, ENSG00000029639, ENSG00000130513, ENSG00000156384, ENSG00000244560, ENSG00000172748, ENSG00000116761, ENSG00000203943, ENSG00000185272, ENSG00000276966, ENSG00000228049, ENSG00000081665, ENSG00000120075, ENSG00000018869, ENSG00000187815, ENSG00000169429, ENSG00000108465, ENSG00000103056, ENSG00000175197, ENSG00000112715, ENSG00000156976, ENSG0000…	167	5487	19277	1.28327	1
GO TERM: BP	GO:0061844~antimicrobial humoral immune response mediated by antimicrobial peptide	GO:0061844	antimicrobial humoral immune response mediated by antimicrobial peptide	5	1.39665	0.0190735	ENSG00000273802, ENSG00000142515, ENSG00000274290, ENSG00000125788, ENSG00000169429	167	118	19277	4.89115	1
GO TERM: BP	GO:0010467~gene expression	GO:0010467	gene expression	74	20.6704	0.0204074	ENSG00000157514, ENSG00000207062, ENSG00000110944, ENSG00000029639, ENSG00000113739, ENSG00000130513, ENSG00000260778, ENSG00000156384, ENSG00000244560, ENSG00000172748, ENSG00000116761, ENSG00000203943, ENSG00000185272, ENSG00000276966, ENSG00000228049, ENSG00000081665, ENSG00000120075, ENSG00000082196, ENSG00000018869, ENSG00000187815, ENSG00000169429, ENSG00000205609, ENSG00000107014, ENSG0000…	167	6942	19277	1.23047	1
GO TERM: BP	GO:0036003~positive regulation of transcription from RNA polymerase II promoter in response to stress	GO:0036003	positive regulation of transcription from RNA polymerase II promoter in response to stress	3	0.837989	0.0209215	ENSG00000175197, ENSG00000112715, ENSG00000162772	167	26	19277	13.319	1
GO TERM: BP	GO:0007017~microtubule-based process	GO:0007017	microtubule-based process	15	4.18994	0.0210924	ENSG00000238105, ENSG00000174672, ENSG00000175265, ENSG00000152086, ENSG00000046651, ENSG00000136883, ENSG00000139537, ENSG00000112981, ENSG00000119878, ENSG00000156042, ENSG00000163322, ENSG00000204815, ENSG00000165115, ENSG00000074935, ENSG00000215252	167	886	19277	1.95425	1
GO TERM: BP	GO:0019731~antibacterial humoral response	GO:0019731	antibacterial humoral response	4	1.11732	0.0225418	ENSG00000124107, ENSG00000273802, ENSG00000142515, ENSG00000274290	167	70	19277	6.59607	1
GO TERM: BP	GO:0031669~cellular response to nutrient levels	GO:0031669	cellular response to nutrient levels	7	1.95531	0.0240791	ENSG00000141682, ENSG00000174672, ENSG00000148346, ENSG00000162772, ENSG00000111012, ENSG00000164326, ENSG00000070669	167	257	19277	3.14404	1
GO TERM: BP	GO:0097659~nucleic acid-templated transcription	GO:0097659	nucleic acid-templated transcription	46	12.8492	0.0241108	ENSG00000157514, ENSG00000110944, ENSG00000029639, ENSG00000130513, ENSG00000277075, ENSG00000267508, ENSG00000156384, ENSG00000083814, ENSG00000229676, ENSG00000006652, ENSG00000133169, ENSG00000244560, ENSG00000196747, ENSG00000196109, ENSG00000116761, ENSG00000172748, ENSG00000188243, ENSG00000203943, ENSG00000228049, ENSG00000276966, ENSG00000081665, ENSG00000120075, ENSG00000162772, ENSG0000…	167	3950	19277	1.34426	1
GO TERM: BP	GO:0043409~negative regulation of MAPK cascade	GO:0043409	negative regulation of MAPK cascade	6	1.67598	0.0254513	ENSG00000120875, ENSG00000138166, ENSG00000167653, ENSG00000162999, ENSG00000162772, ENSG00000108465	167	192	19277	3.60722	1
GO TERM: BP	GO:0033554~cellular response to stress	GO:0033554	cellular response to stress	29	8.10056	0.0260713	ENSG00000113739, ENSG00000174672, ENSG00000156384, ENSG00000112981, ENSG00000116761, ENSG00000185272, ENSG00000276966, ENSG00000164294, ENSG00000149599, ENSG00000148346, ENSG00000162999, ENSG00000162772, ENSG00000163322, ENSG00000169429, ENSG00000108465, ENSG00000103056, ENSG00000151164, ENSG00000175197, ENSG00000112715, ENSG00000173531, ENSG00000130222, ENSG00000141682, ENSG00000078487, ENSG0000…	167	2231	19277	1.50045	1
GO TERM: BP	GO:0043405~regulation of MAP kinase activity	GO:0043405	regulation of MAP kinase activity	8	2.23464	0.0262328	ENSG00000120875, ENSG00000112715, ENSG00000138166, ENSG00000130513, ENSG00000162999, ENSG00000130222, ENSG00000108465, ENSG00000164326	167	335	19277	2.75656	1
GO TERM: BP	GO:1903506~regulation of nucleic acid-templated transcription	GO:1903506	regulation of nucleic acid-templated transcription	44	12.2905	0.0278601	ENSG00000157514, ENSG00000110944, ENSG00000130513, ENSG00000277075, ENSG00000267508, ENSG00000156384, ENSG00000083814, ENSG00000229676, ENSG00000006652, ENSG00000133169, ENSG00000244560, ENSG00000196747, ENSG00000196109, ENSG00000116761, ENSG00000172748, ENSG00000188243, ENSG00000203943, ENSG00000276966, ENSG00000081665, ENSG00000120075, ENSG00000162772, ENSG00000018869, ENSG00000187815, ENSG0000…	167	3776	19277	1.34507	1
GO TERM: BP	GO:0043407~negative regulation of MAP kinase activity	GO:0043407	negative regulation of MAP kinase activity	4	1.11732	0.0278953	ENSG00000120875, ENSG00000138166, ENSG00000162999, ENSG00000108465	167	76	19277	6.07532	1
GO TERM: BP	GO:0051252~regulation of RNA metabolic process	GO:0051252	regulation of RNA metabolic process	46	12.8492	0.0294159	ENSG00000157514, ENSG00000110944, ENSG00000130513, ENSG00000277075, ENSG00000267508, ENSG00000156384, ENSG00000083814, ENSG00000229676, ENSG00000006652, ENSG00000133169, ENSG00000244560, ENSG00000196747, ENSG00000196109, ENSG00000116761, ENSG00000172748, ENSG00000188243, ENSG00000203943, ENSG00000185272, ENSG00000276966, ENSG00000081665, ENSG00000120075, ENSG00000162772, ENSG00000018869, ENSG0000…	167	4000	19277	1.32746	1
GO TERM: BP	GO:2001141~regulation of RNA biosynthetic process	GO:2001141	regulation of RNA biosynthetic process	44	12.2905	0.030783	ENSG00000157514, ENSG00000110944, ENSG00000130513, ENSG00000277075, ENSG00000267508, ENSG00000156384, ENSG00000083814, ENSG00000229676, ENSG00000006652, ENSG00000133169, ENSG00000244560, ENSG00000196747, ENSG00000196109, ENSG00000116761, ENSG00000172748, ENSG00000188243, ENSG00000203943, ENSG00000276966, ENSG00000081665, ENSG00000120075, ENSG00000162772, ENSG00000018869, ENSG00000187815, ENSG0000…	167	3801	19277	1.33622	1
GO TERM: BP	GO:0031668~cellular response to extracellular stimulus	GO:0031668	cellular response to extracellular stimulus	7	1.95531	0.0391121	ENSG00000141682, ENSG00000174672, ENSG00000148346, ENSG00000162772, ENSG00000111012, ENSG00000164326, ENSG00000070669	167	289	19277	2.79591	1
GO TERM: BP	GO:0071496~cellular response to external stimulus	GO:0071496	cellular response to external stimulus	8	2.23464	0.0394603	ENSG00000141682, ENSG00000174672, ENSG00000148346, ENSG00000162772, ENSG00000125398, ENSG00000111012, ENSG00000164326, ENSG00000070669	167	366	19277	2.52308	1
GO TERM: BP	GO:0019219~regulation of nucleobase-containing compound metabolic process	GO:0019219	regulation of nucleobase-containing compound metabolic process	49	13.6872	0.0411908	ENSG00000157514, ENSG00000110944, ENSG00000130513, ENSG00000277075, ENSG00000267508, ENSG00000156384, ENSG00000083814, ENSG00000229676, ENSG00000006652, ENSG00000133169, ENSG00000244560, ENSG00000196747, ENSG00000196109, ENSG00000172748, ENSG00000116761, ENSG00000188243, ENSG00000203943, ENSG00000185272, ENSG00000276966, ENSG00000081665, ENSG00000120075, ENSG00000163322, ENSG00000162772, ENSG0000…	167	4410	19277	1.28257	1
GO TERM: BP	GO:0006355~regulation of transcription, DNA-templated	GO:0006355	regulation of transcription, DNA-templated	43	12.0112	0.0416107	ENSG00000157514, ENSG00000110944, ENSG00000130513, ENSG00000277075, ENSG00000267508, ENSG00000156384, ENSG00000083814, ENSG00000229676, ENSG00000006652, ENSG00000133169, ENSG00000244560, ENSG00000196747, ENSG00000196109, ENSG00000116761, ENSG00000172748, ENSG00000188243, ENSG00000203943, ENSG00000276966, ENSG00000081665, ENSG00000120075, ENSG00000162772, ENSG00000018869, ENSG00000187815, ENSG0000…	167	3774	19277	1.31519	1
GO TERM: BP	GO:0098542~defense response to other organism	GO:0098542	defense response to other organism	12	3.35196	0.0421326	ENSG00000110944, ENSG00000023445, ENSG00000172183, ENSG00000141682, ENSG00000124107, ENSG00000273802, ENSG00000148346, ENSG00000142515, ENSG00000274290, ENSG00000125788, ENSG00000168209, ENSG00000073605	167	706	19277	1.962	1
GO TERM: BP	GO:0006334~nucleosome assembly	GO:0006334	nucleosome assembly	5	1.39665	0.0425801	ENSG00000276966, ENSG00000273802, ENSG00000274290, ENSG00000125398, ENSG00000203814	167	152	19277	3.79708	1
GO TERM: BP	GO:0031667~response to nutrient levels	GO:0031667	response to nutrient levels	10	2.7933	0.0475154	ENSG00000175197, ENSG00000141682, ENSG00000113739, ENSG00000130513, ENSG00000174672, ENSG00000148346, ENSG00000162772, ENSG00000111012, ENSG00000164326, ENSG00000070669	167	547	19277	2.11026	1
GO TERM: BP	GO:0006109~regulation of carbohydrate metabolic process	GO:0006109	regulation of carbohydrate metabolic process	6	1.67598	0.0482184	ENSG00000141682, ENSG00000160180, ENSG00000173531, ENSG00000082196, ENSG00000168209, ENSG00000103056	167	229	19277	3.0244	1
GO TERM: BP	GO:0002385~mucosal immune response	GO:0002385	mucosal immune response	3	0.837989	0.048558	ENSG00000126262, ENSG00000273802, ENSG00000274290	167	41	19277	8.44618	1
GO TERM: BP	GO:0018130~heterocycle biosynthetic process	GO:0018130	heterocycle biosynthetic process	50	13.9665	0.0499857	ENSG00000157514, ENSG00000110944, ENSG00000029639, ENSG00000130513, ENSG00000156384, ENSG00000244560, ENSG00000196517, ENSG00000172748, ENSG00000116761, ENSG00000203943, ENSG00000276966, ENSG00000228049, ENSG00000081665, ENSG00000120075, ENSG00000018869, ENSG00000187815, ENSG00000108465, ENSG00000103056, ENSG00000175197, ENSG00000112715, ENSG00000156976, ENSG00000187243, ENSG00000102878, ENSG0000…	167	4574	19277	1.26182	1

## Sheet: KEGG
Category	Term	ID	Pathway	Count	%	PValue	Genes	List Total	Pop Hits	Pop Total	Fold Enrichment	Benjamini padj
KEGG_PATHWAY	hsa05168:Herpes simplex virus 1 infection	hsa05168	Herpes simplex virus 1 infection	12	3.35196	0.00356041	ENSG00000196605, ENSG00000172748, ENSG00000023445, ENSG00000170954, ENSG00000081665, ENSG00000267508, ENSG00000083814, ENSG00000160321, ENSG00000018869, ENSG00000229676, ENSG00000187815, ENSG00000196109	72	495	8112	2.73131	0.545429
KEGG_PATHWAY	hsa05322:Systemic lupus erythematosus	hsa05322	Systemic lupus erythematosus	6	1.67598	0.00661125	ENSG00000276966, ENSG00000277075, ENSG00000273802, ENSG00000274290, ENSG00000203814, ENSG00000196747	72	136	8112	4.97059	0.545429
KEGG_PATHWAY	hsa05034:Alcoholism	hsa05034	Alcoholism	6	1.67598	0.0235897	ENSG00000276966, ENSG00000277075, ENSG00000273802, ENSG00000274290, ENSG00000203814, ENSG00000196747	72	187	8112	3.61497	1
KEGG_PATHWAY	hsa04613:Neutrophil extracellular trap formation	hsa04613	Neutrophil extracellular trap formation	6	1.67598	0.0250605	ENSG00000276966, ENSG00000277075, ENSG00000273802, ENSG00000274290, ENSG00000203814, ENSG00000196747	72	190	8112	3.55789	1
KEGG_PATHWAY	hsa04210:Apoptosis	hsa04210	Apoptosis	5	1.39665	0.0309644	ENSG00000175197, ENSG00000023445, ENSG00000141682, ENSG00000152086, ENSG00000130222	72	136	8112	4.14216	1

## Sheet: Reactome
Category	Term	ID	Pathway	Count	%	PValue	Genes	List Total	Pop Hits	Pop Total	Fold Enrichment	Benjamini padj
REACTOME_PATHWAY	R-HSA-5625886~Activated PKN1 stimulates transcription of AR (androgen receptor) regulated genes KLK2 and KLK3	R-HSA-5625886	Activated PKN1 stimulates transcription of AR (androgen receptor) regulated genes KLK2 and KLK3	6	1.67598	0.000220613	ENSG00000167751, ENSG00000276966, ENSG00000277075, ENSG00000273802, ENSG00000142515, ENSG00000274290	88	67	10538	10.7239	0.0523692
REACTOME_PATHWAY	R-HSA-9648895~Response of EIF2AK1 (HRI) to heme deficiency	R-HSA-9648895	Response of EIF2AK1 (HRI) to heme deficiency	4	1.11732	0.000230194	ENSG00000175197, ENSG00000128965, ENSG00000162772, ENSG00000070669	88	15	10538	31.9333	0.0523692
REACTOME_PATHWAY	R-HSA-9609690~HCMV Early Events	R-HSA-9609690	HCMV Early Events	7	1.95531	0.000853939	ENSG00000276966, ENSG00000277075, ENSG00000152086, ENSG00000273802, ENSG00000274290, ENSG00000203814, ENSG00000196747	88	135	10538	6.20926	0.0783526
REACTOME_PATHWAY	R-HSA-212436~Generic Transcription Pathway	R-HSA-212436	Generic Transcription Pathway	22	6.14525	0.000913039	ENSG00000151164, ENSG00000175197, ENSG00000196172, ENSG00000112715, ENSG00000277075, ENSG00000267508, ENSG00000083814, ENSG00000274290, ENSG00000229676, ENSG00000196109, ENSG00000170954, ENSG00000172748, ENSG00000141682, ENSG00000276966, ENSG00000081665, ENSG00000273802, ENSG00000186777, ENSG00000160321, ENSG00000125398, ENSG00000018869, ENSG00000187815, ENSG00000168209	88	1239	10538	2.12631	0.0783526
REACTOME_PATHWAY	R-HSA-3214815~HDACs deacetylate histones	R-HSA-3214815	HDACs deacetylate histones	6	1.67598	0.00105345	ENSG00000276966, ENSG00000277075, ENSG00000273802, ENSG00000274290, ENSG00000203814, ENSG00000196747	88	94	10538	7.64362	0.0783526
REACTOME_PATHWAY	R-HSA-5625740~RHO GTPases activate PKNs	R-HSA-5625740	RHO GTPases activate PKNs	6	1.67598	0.00110484	ENSG00000167751, ENSG00000276966, ENSG00000277075, ENSG00000273802, ENSG00000142515, ENSG00000274290	88	95	10538	7.56316	0.0783526
REACTOME_PATHWAY	R-HSA-73857~RNA Polymerase II Transcription	R-HSA-73857	RNA Polymerase II Transcription	23	6.42458	0.00127548	ENSG00000151164, ENSG00000175197, ENSG00000196172, ENSG00000112715, ENSG00000277075, ENSG00000267508, ENSG00000083814, ENSG00000274290, ENSG00000229676, ENSG00000196109, ENSG00000170954, ENSG00000172748, ENSG00000141682, ENSG00000276966, ENSG00000081665, ENSG00000160201, ENSG00000273802, ENSG00000186777, ENSG00000160321, ENSG00000125398, ENSG00000018869, ENSG00000187815, ENSG00000168209	88	1362	10538	2.02221	0.0783526
REACTOME_PATHWAY	R-HSA-380994~ATF4 activates genes in response to endoplasmic reticulum stress	R-HSA-380994	ATF4 activates genes in response to endoplasmic reticulum stress	4	1.11732	0.00137763	ENSG00000175197, ENSG00000162772, ENSG00000169429, ENSG00000070669	88	27	10538	17.7407	0.0783526
REACTOME_PATHWAY	R-HSA-9609646~HCMV Infection	R-HSA-9609646	HCMV Infection	7	1.95531	0.00204549	ENSG00000276966, ENSG00000277075, ENSG00000152086, ENSG00000273802, ENSG00000274290, ENSG00000203814, ENSG00000196747	88	160	10538	5.23906	0.103178
REACTOME_PATHWAY	R-HSA-381042~PERK regulates gene expression	R-HSA-381042	PERK regulates gene expression	4	1.11732	0.00226765	ENSG00000175197, ENSG00000162772, ENSG00000169429, ENSG00000070669	88	32	10538	14.9688	0.103178
REACTOME_PATHWAY	R-HSA-9610379~HCMV Late Events	R-HSA-9610379	HCMV Late Events	6	1.67598	0.00267211	ENSG00000276966, ENSG00000277075, ENSG00000273802, ENSG00000274290, ENSG00000203814, ENSG00000196747	88	116	10538	6.19397	0.110528
REACTOME_PATHWAY	R-HSA-2262752~Cellular responses to stress	R-HSA-2262752	Cellular responses to stress	15	4.18994	0.00343626	ENSG00000175197, ENSG00000112715, ENSG00000277075, ENSG00000152086, ENSG00000134419, ENSG00000274290, ENSG00000145425, ENSG00000276966, ENSG00000168970, ENSG00000164294, ENSG00000273802, ENSG00000128965, ENSG00000162772, ENSG00000169429, ENSG00000070669	88	757	10538	2.37285	0.130291
REACTOME_PATHWAY	R-HSA-8953897~Cellular responses to stimuli	R-HSA-8953897	Cellular responses to stimuli	15	4.18994	0.00405105	ENSG00000175197, ENSG00000112715, ENSG00000277075, ENSG00000152086, ENSG00000134419, ENSG00000274290, ENSG00000145425, ENSG00000276966, ENSG00000168970, ENSG00000164294, ENSG00000273802, ENSG00000128965, ENSG00000162772, ENSG00000169429, ENSG00000070669	88	771	10538	2.32977	0.141787
REACTOME_PATHWAY	R-HSA-74160~Gene expression (Transcription)	R-HSA-74160	Gene expression (Transcription)	23	6.42458	0.00443121	ENSG00000151164, ENSG00000175197, ENSG00000196172, ENSG00000112715, ENSG00000277075, ENSG00000267508, ENSG00000083814, ENSG00000274290, ENSG00000229676, ENSG00000196109, ENSG00000170954, ENSG00000172748, ENSG00000141682, ENSG00000276966, ENSG00000081665, ENSG00000160201, ENSG00000273802, ENSG00000186777, ENSG00000160321, ENSG00000125398, ENSG00000018869, ENSG00000187815, ENSG00000168209	88	1502	10538	1.83372	0.144014
REACTOME_PATHWAY	R-HSA-3214847~HATs acetylate histones	R-HSA-3214847	HATs acetylate histones	6	1.67598	0.00631941	ENSG00000276966, ENSG00000277075, ENSG00000273802, ENSG00000274290, ENSG00000203814, ENSG00000196747	88	142	10538	5.05986	0.191689
REACTOME_PATHWAY	R-HSA-381119~Unfolded Protein Response (UPR)	R-HSA-381119	Unfolded Protein Response (UPR)	5	1.39665	0.00751964	ENSG00000175197, ENSG00000168970, ENSG00000162772, ENSG00000169429, ENSG00000070669	88	94	10538	6.36968	0.208808
REACTOME_PATHWAY	R-HSA-69473~G2/M DNA damage checkpoint	R-HSA-69473	G2/M DNA damage checkpoint	5	1.39665	0.00780161	ENSG00000151164, ENSG00000276966, ENSG00000273802, ENSG00000274290, ENSG00000163322	88	95	10538	6.30263	0.208808
REACTOME_PATHWAY	R-HSA-5693607~Processing of DNA double-strand break ends	R-HSA-5693607	Processing of DNA double-strand break ends	5	1.39665	0.00868907	ENSG00000151164, ENSG00000276966, ENSG00000273802, ENSG00000274290, ENSG00000163322	88	98	10538	6.10969	0.214945
REACTOME_PATHWAY	R-HSA-171306~Packaging Of Telomere Ends	R-HSA-171306	Packaging Of Telomere Ends	4	1.11732	0.00897573	ENSG00000276966, ENSG00000277075, ENSG00000273802, ENSG00000274290	88	52	10538	9.21154	0.214945
REACTOME_PATHWAY	R-HSA-9633012~Response of EIF2AK4 (GCN2) to amino acid deficiency	R-HSA-9633012	Response of EIF2AK4 (GCN2) to amino acid deficiency	5	1.39665	0.00964023	ENSG00000175197, ENSG00000145425, ENSG00000134419, ENSG00000162772, ENSG00000070669	88	101	10538	5.92822	0.217498
REACTOME_PATHWAY	R-HSA-110330~Recognition and association of DNA glycosylase with site containing an affected purine	R-HSA-110330	Recognition and association of DNA glycosylase with site containing an affected purine	4	1.11732	0.0109959	ENSG00000276966, ENSG00000277075, ENSG00000273802, ENSG00000274290	88	56	10538	8.55357	0.217498
REACTOME_PATHWAY	R-HSA-73927~Depurination	R-HSA-73927	Depurination	4	1.11732	0.0109959	ENSG00000276966, ENSG00000277075, ENSG00000273802, ENSG00000274290	88	56	10538	8.55357	0.217498
REACTOME_PATHWAY	R-HSA-110331~Cleavage of the damaged purine	R-HSA-110331	Cleavage of the damaged purine	4	1.11732	0.0109959	ENSG00000276966, ENSG00000277075, ENSG00000273802, ENSG00000274290	88	56	10538	8.55357	0.217498
REACTOME_PATHWAY	R-HSA-9006931~Signaling by Nuclear Receptors	R-HSA-9006931	Signaling by Nuclear Receptors	8	2.23464	0.011648	ENSG00000160180, ENSG00000276966, ENSG00000277075, ENSG00000130208, ENSG00000273802, ENSG00000170231, ENSG00000274290, ENSG00000143320	88	299	10538	3.20401	0.217498
REACTOME_PATHWAY	R-HSA-1912422~Pre-NOTCH Expression and Processing	R-HSA-1912422	Pre-NOTCH Expression and Processing	5	1.39665	0.0125008	ENSG00000276966, ENSG00000277075, ENSG00000273802, ENSG00000274290, ENSG00000106003	88	109	10538	5.49312	0.217498
REACTOME_PATHWAY	R-HSA-2559582~Senescence-Associated Secretory Phenotype (SASP)	R-HSA-2559582	Senescence-Associated Secretory Phenotype (SASP)	5	1.39665	0.0136995	ENSG00000276966, ENSG00000277075, ENSG00000273802, ENSG00000274290, ENSG00000169429	88	112	10538	5.34598	0.217498
REACTOME_PATHWAY	R-HSA-73928~Depyrimidination	R-HSA-73928	Depyrimidination	4	1.11732	0.0138625	ENSG00000276966, ENSG00000277075, ENSG00000273802, ENSG00000274290	88	61	10538	7.85246	0.217498
REACTOME_PATHWAY	R-HSA-110329~Cleavage of the damaged pyrimidine	R-HSA-110329	Cleavage of the damaged pyrimidine	4	1.11732	0.0138625	ENSG00000276966, ENSG00000277075, ENSG00000273802, ENSG00000274290	88	61	10538	7.85246	0.217498
REACTOME_PATHWAY	R-HSA-110328~Recognition and association of DNA glycosylase with site containing an affected pyrimidine	R-HSA-110328	Recognition and association of DNA glycosylase with site containing an affected pyrimidine	4	1.11732	0.0138625	ENSG00000276966, ENSG00000277075, ENSG00000273802, ENSG00000274290	88	61	10538	7.85246	0.217498
REACTOME_PATHWAY	R-HSA-73929~Base-Excision Repair, AP Site Formation	R-HSA-73929	Base-Excision Repair, AP Site Formation	4	1.11732	0.0151171	ENSG00000276966, ENSG00000277075, ENSG00000273802, ENSG00000274290	88	63	10538	7.60317	0.221879
REACTOME_PATHWAY	R-HSA-73728~RNA Polymerase I Promoter Opening	R-HSA-73728	RNA Polymerase I Promoter Opening	4	1.11732	0.0151171	ENSG00000276966, ENSG00000277075, ENSG00000273802, ENSG00000274290	88	63	10538	7.60317	0.221879
REACTOME_PATHWAY	R-HSA-5334118~DNA methylation	R-HSA-5334118	DNA methylation	4	1.11732	0.0164338	ENSG00000276966, ENSG00000277075, ENSG00000273802, ENSG00000274290	88	65	10538	7.36923	0.233668
REACTOME_PATHWAY	R-HSA-427359~SIRT1 negatively regulates rRNA expression	R-HSA-427359	SIRT1 negatively regulates rRNA expression	4	1.11732	0.0185263	ENSG00000276966, ENSG00000277075, ENSG00000273802, ENSG00000274290	88	68	10538	7.04412	0.243364
REACTOME_PATHWAY	R-HSA-9670095~Inhibition of DNA recombination at telomere	R-HSA-9670095	Inhibition of DNA recombination at telomere	4	1.11732	0.0185263	ENSG00000276966, ENSG00000277075, ENSG00000273802, ENSG00000274290	88	68	10538	7.04412	0.243364
REACTOME_PATHWAY	R-HSA-68616~Assembly of the ORC complex at the origin of replication	R-HSA-68616	Assembly of the ORC complex at the origin of replication	4	1.11732	0.0192552	ENSG00000276966, ENSG00000277075, ENSG00000273802, ENSG00000274290	88	69	10538	6.94203	0.243364
REACTOME_PATHWAY	R-HSA-5693571~Nonhomologous End-Joining (NHEJ)	R-HSA-5693571	Nonhomologous End-Joining (NHEJ)	4	1.11732	0.0192552	ENSG00000276966, ENSG00000273802, ENSG00000274290, ENSG00000163322	88	69	10538	6.94203	0.243364
REACTOME_PATHWAY	R-HSA-9710421~Defective pyroptosis	R-HSA-9710421	Defective pyroptosis	4	1.11732	0.0223282	ENSG00000276966, ENSG00000277075, ENSG00000273802, ENSG00000274290	88	73	10538	6.56164	0.255234
REACTOME_PATHWAY	R-HSA-212300~PRC2 methylates histones and DNA	R-HSA-212300	PRC2 methylates histones and DNA	4	1.11732	0.0223282	ENSG00000276966, ENSG00000277075, ENSG00000273802, ENSG00000274290	88	73	10538	6.56164	0.255234
REACTOME_PATHWAY	R-HSA-2299718~Condensation of Prophase Chromosomes	R-HSA-2299718	Condensation of Prophase Chromosomes	4	1.11732	0.0231359	ENSG00000276966, ENSG00000277075, ENSG00000273802, ENSG00000274290	88	74	10538	6.47297	0.255234
REACTOME_PATHWAY	R-HSA-606279~Deposition of new CENPA-containing nucleosomes at the centromere	R-HSA-606279	Deposition of new CENPA-containing nucleosomes at the centromere	4	1.11732	0.0231359	ENSG00000276966, ENSG00000277075, ENSG00000273802, ENSG00000274290	88	74	10538	6.47297	0.255234
REACTOME_PATHWAY	R-HSA-774815~Nucleosome assembly	R-HSA-774815	Nucleosome assembly	4	1.11732	0.0231359	ENSG00000276966, ENSG00000277075, ENSG00000273802, ENSG00000274290	88	74	10538	6.47297	0.255234
REACTOME_PATHWAY	R-HSA-5693567~HDR through Homologous Recombination (HRR) or Single Strand Annealing (SSA)	R-HSA-5693567	HDR through Homologous Recombination (HRR) or Single Strand Annealing (SSA)	5	1.39665	0.0235601	ENSG00000151164, ENSG00000276966, ENSG00000273802, ENSG00000274290, ENSG00000163322	88	132	10538	4.53598	0.255234
REACTOME_PATHWAY	R-HSA-427389~ERCC6 (CSB) and EHMT2 (G9a) positively regulate rRNA expression	R-HSA-427389	ERCC6 (CSB) and EHMT2 (G9a) positively regulate rRNA expression	4	1.11732	0.0247986	ENSG00000276966, ENSG00000277075, ENSG00000273802, ENSG00000274290	88	76	10538	6.30263	0.262404
REACTOME_PATHWAY	R-HSA-5693565~Recruitment and ATM-mediated phosphorylation of repair and signaling proteins at DNA double strand breaks	R-HSA-5693565	Recruitment and ATM-mediated phosphorylation of repair and signaling proteins at DNA double strand breaks	4	1.11732	0.0256536	ENSG00000276966, ENSG00000273802, ENSG00000274290, ENSG00000163322	88	77	10538	6.22078	0.265281
REACTOME_PATHWAY	R-HSA-5693606~DNA Double Strand Break Response	R-HSA-5693606	DNA Double Strand Break Response	4	1.11732	0.0265243	ENSG00000276966, ENSG00000273802, ENSG00000274290, ENSG00000163322	88	78	10538	6.14103	0.26536
REACTOME_PATHWAY	R-HSA-5693538~Homology Directed Repair	R-HSA-5693538	Homology Directed Repair	5	1.39665	0.0271807	ENSG00000151164, ENSG00000276966, ENSG00000273802, ENSG00000274290, ENSG00000163322	88	138	10538	4.33877	0.26536
REACTOME_PATHWAY	R-HSA-1221632~Meiotic synapsis	R-HSA-1221632	Meiotic synapsis	4	1.11732	0.0274108	ENSG00000276966, ENSG00000277075, ENSG00000273802, ENSG00000274290	88	79	10538	6.06329	0.26536
REACTOME_PATHWAY	R-HSA-2559586~DNA Damage/Telomere Stress Induced Senescence	R-HSA-2559586	DNA Damage/Telomere Stress Induced Senescence	4	1.11732	0.028313	ENSG00000276966, ENSG00000277075, ENSG00000273802, ENSG00000274290	88	80	10538	5.9875	0.268383
REACTOME_PATHWAY	R-HSA-1474165~Reproduction	R-HSA-1474165	Reproduction	5	1.39665	0.0304394	ENSG00000166762, ENSG00000276966, ENSG00000277075, ENSG00000273802, ENSG00000274290	88	143	10538	4.18706	0.282651
REACTOME_PATHWAY	R-HSA-912446~Meiotic recombination	R-HSA-912446	Meiotic recombination	4	1.11732	0.0340549	ENSG00000276966, ENSG00000277075, ENSG00000273802, ENSG00000274290	88	86	10538	5.56977	0.306027
REACTOME_PATHWAY	R-HSA-5689880~Ub-specific processing proteases	R-HSA-5689880	Ub-specific processing proteases	6	1.67598	0.0352497	ENSG00000023445, ENSG00000277075, ENSG00000273802, ENSG00000274290, ENSG00000203814, ENSG00000196747	88	220	10538	3.26591	0.306027
REACTOME_PATHWAY	R-HSA-9018519~Estrogen-dependent gene expression	R-HSA-9018519	Estrogen-dependent gene expression	5	1.39665	0.0353751	ENSG00000160180, ENSG00000276966, ENSG00000277075, ENSG00000273802, ENSG00000274290	88	150	10538	3.99167	0.306027
REACTOME_PATHWAY	R-HSA-5688426~Deubiquitination	R-HSA-5688426	Deubiquitination	7	1.95531	0.0364385	ENSG00000023445, ENSG00000277075, ENSG00000273802, ENSG00000274290, ENSG00000163322, ENSG00000203814, ENSG00000196747	88	298	10538	2.81292	0.306027
REACTOME_PATHWAY	R-HSA-5689901~Metalloprotease DUBs	R-HSA-5689901	Metalloprotease DUBs	3	0.837989	0.0372308	ENSG00000277075, ENSG00000163322, ENSG00000196747	88	37	10538	9.70946	0.306027
REACTOME_PATHWAY	R-HSA-9616222~Transcriptional regulation of granulopoiesis	R-HSA-9616222	Transcriptional regulation of granulopoiesis	4	1.11732	0.0381936	ENSG00000276966, ENSG00000277075, ENSG00000273802, ENSG00000274290	88	90	10538	5.32222	0.306027
REACTOME_PATHWAY	R-HSA-73772~RNA Polymerase I Promoter Escape	R-HSA-73772	RNA Polymerase I Promoter Escape	4	1.11732	0.0392668	ENSG00000276966, ENSG00000277075, ENSG00000273802, ENSG00000274290	88	91	10538	5.26374	0.306027
REACTOME_PATHWAY	R-HSA-5250924~B-WICH complex positively regulates rRNA expression	R-HSA-5250924	B-WICH complex positively regulates rRNA expression	4	1.11732	0.0392668	ENSG00000276966, ENSG00000277075, ENSG00000273802, ENSG00000274290	88	91	10538	5.26374	0.306027
REACTOME_PATHWAY	R-HSA-201722~Formation of the beta-catenin:TCF transactivating complex	R-HSA-201722	Formation of the beta-catenin:TCF transactivating complex	4	1.11732	0.0392668	ENSG00000276966, ENSG00000277075, ENSG00000273802, ENSG00000274290	88	91	10538	5.26374	0.306027
REACTOME_PATHWAY	R-HSA-9711097~Cellular response to starvation	R-HSA-9711097	Cellular response to starvation	5	1.39665	0.0399553	ENSG00000175197, ENSG00000145425, ENSG00000134419, ENSG00000162772, ENSG00000070669	88	156	10538	3.83814	0.306027
REACTOME_PATHWAY	R-HSA-73884~Base Excision Repair	R-HSA-73884	Base Excision Repair	4	1.11732	0.0403553	ENSG00000276966, ENSG00000277075, ENSG00000273802, ENSG00000274290	88	92	10538	5.20652	0.306027
REACTOME_PATHWAY	R-HSA-1912408~Pre-NOTCH Transcription and Translation	R-HSA-1912408	Pre-NOTCH Transcription and Translation	4	1.11732	0.0414589	ENSG00000276966, ENSG00000277075, ENSG00000273802, ENSG00000274290	88	93	10538	5.15054	0.309243
REACTOME_PATHWAY	R-HSA-8936459~RUNX1 regulates genes involved in megakaryocyte differentiation and platelet function	R-HSA-8936459	RUNX1 regulates genes involved in megakaryocyte differentiation and platelet function	4	1.11732	0.046025	ENSG00000276966, ENSG00000277075, ENSG00000273802, ENSG00000274290	88	97	10538	4.93814	0.337764
REACTOME_PATHWAY	R-HSA-69481~G2/M Checkpoints	R-HSA-69481	G2/M Checkpoints	5	1.39665	0.0491938	ENSG00000151164, ENSG00000276966, ENSG00000273802, ENSG00000274290, ENSG00000163322	88	167	10538	3.58533	0.349737
REACTOME_PATHWAY	R-HSA-5693532~DNA Double-Strand Break Repair	R-HSA-5693532	DNA Double-Strand Break Repair	5	1.39665	0.0491938	ENSG00000151164, ENSG00000276966, ENSG00000273802, ENSG00000274290, ENSG00000163322	88	167	10538	3.58533	0.349737
