# Supplementary material for: Culture of Cancer Cells at Physiological Oxygen Levels Affects Gene Expression in a Cell-Type Specific Manner
Source: Preprints.org preprint supplement (doi:10.20944/preprints202208.0497.v1), 2022-08-29
Supplement: Supplementary file 10 [file Table S6 Functional Enrichent LNCaP 18% O2.xlsx]

## Sheet: GO
Category	Term	ID	Name	Count	%	PValue	Genes	List Total	Pop Hits	Pop Total	Fold Enrichment	Benjamini padj
GO TERM: CC	GO:0071144~SMAD2-SMAD3 protein complex	GO:0071144	SMAD2-SMAD3 protein complex	3	2.75229	0.000474778	ENSG00000101665, ENSG00000137834, ENSG00000120693	73	8	17223	88.4743	0.105489
GO TERM: CC	GO:0071141~SMAD protein complex	GO:0071141	SMAD protein complex	3	2.75229	0.000758915	ENSG00000101665, ENSG00000137834, ENSG00000120693	73	10	17223	70.7795	0.105489
GO TERM: CC	GO:0005667~transcription factor complex	GO:0005667	transcription factor complex	7	6.42202	0.00827393	ENSG00000245848, ENSG00000169136, ENSG00000129194, ENSG00000101665, ENSG00000137834, ENSG00000167081, ENSG00000120693	73	421	17223	3.92285	0.53674
GO TERM: CC	GO:0030426~growth cone	GO:0030426	growth cone	5	4.58716	0.00869338	ENSG00000169258, ENSG00000158828, ENSG00000124126, ENSG00000197457, ENSG00000182168	73	193	17223	6.11222	0.53674
GO TERM: CC	GO:0030427~site of polarized growth	GO:0030427	site of polarized growth	5	4.58716	0.0096536	ENSG00000169258, ENSG00000158828, ENSG00000124126, ENSG00000197457, ENSG00000182168	73	199	17223	5.92793	0.53674
GO TERM: MF	GO:0070411~I-SMAD binding	GO:0070411	I-SMAD binding	3	2.75229	0.00183379	ENSG00000101665, ENSG00000137834, ENSG00000120693	78	14	16739	45.9863	0.729847
GO TERM: CC	GO:0000785~chromatin	GO:0000785	chromatin	12	11.0092	0.0157966	ENSG00000064195, ENSG00000245848, ENSG00000169136, ENSG00000158828, ENSG00000151623, ENSG00000129194, ENSG00000108001, ENSG00000101665, ENSG00000137834, ENSG00000167081, ENSG00000269466, ENSG00000120693	73	1269	17223	2.23103	0.731907
GO TERM: BP	GO:0051128~regulation of cellular component organization	GO:0051128	regulation of cellular component organization	25	22.9358	0.000587304	ENSG00000108947, ENSG00000158828, ENSG00000181284, ENSG00000197457, ENSG00000134775, ENSG00000117114, ENSG00000113070, ENSG00000253626, ENSG00000183098, ENSG00000125968, ENSG00000168496, ENSG00000123094, ENSG00000245848, ENSG00000138668, ENSG00000137834, ENSG00000130164, ENSG00000175928, ENSG00000115263, ENSG00000120885, ENSG00000169136, ENSG00000157240, ENSG00000127955, ENSG00000124126, ENSG0000…	82	2892	19277	2.0322	0.748831
GO TERM: BP	GO:0001933~negative regulation of protein phosphorylation	GO:0001933	negative regulation of protein phosphorylation	9	8.25688	0.000645823	ENSG00000158050, ENSG00000245848, ENSG00000158828, ENSG00000162545, ENSG00000163888, ENSG00000101665, ENSG00000146674, ENSG00000013364, ENSG00000137834	82	455	19277	4.65004	0.748831
GO TERM: BP	GO:0042326~negative regulation of phosphorylation	GO:0042326	negative regulation of phosphorylation	9	8.25688	0.00121741	ENSG00000158050, ENSG00000245848, ENSG00000158828, ENSG00000162545, ENSG00000163888, ENSG00000101665, ENSG00000146674, ENSG00000013364, ENSG00000137834	82	502	19277	4.21468	0.85134
GO TERM: BP	GO:0031400~negative regulation of protein modification process	GO:0031400	negative regulation of protein modification process	10	9.17431	0.00146846	ENSG00000268606, ENSG00000158050, ENSG00000245848, ENSG00000158828, ENSG00000162545, ENSG00000163888, ENSG00000101665, ENSG00000146674, ENSG00000013364, ENSG00000137834	82	642	19277	3.66177	0.85134
GO TERM: CC	GO:0045202~synapse	GO:0045202	synapse	12	11.0092	0.0317246	ENSG00000131389, ENSG00000169258, ENSG00000120885, ENSG00000108947, ENSG00000105404, ENSG00000183098, ENSG00000234965, ENSG00000162545, ENSG00000138668, ENSG00000163888, ENSG00000182168, ENSG00000117114	73	1411	17223	2.0065	0.858898
GO TERM: CC	GO:0031093~platelet alpha granule lumen	GO:0031093	platelet alpha granule lumen	3	2.75229	0.0319982	ENSG00000120885, ENSG00000116260, ENSG00000163631	73	67	17223	10.5641	0.858898
GO TERM: CC	GO:0045211~postsynaptic membrane	GO:0045211	postsynaptic membrane	5	4.58716	0.0324724	ENSG00000131389, ENSG00000169258, ENSG00000108947, ENSG00000234965, ENSG00000117114	73	288	17223	4.09603	0.858898
GO TERM: CC	GO:0044432~endoplasmic reticulum part	GO:0044432	endoplasmic reticulum part	12	11.0092	0.0379572	ENSG00000175283, ENSG00000115263, ENSG00000120885, ENSG00000139970, ENSG00000185818, ENSG00000116260, ENSG00000253626, ENSG00000151623, ENSG00000104549, ENSG00000185303, ENSG00000146674, ENSG00000163631	73	1452	17223	1.94985	0.858898
GO TERM: CC	GO:0005788~endoplasmic reticulum lumen	GO:0005788	endoplasmic reticulum lumen	5	4.58716	0.0428541	ENSG00000115263, ENSG00000120885, ENSG00000116260, ENSG00000146674, ENSG00000163631	73	315	17223	3.74494	0.858898
GO TERM: CC	GO:0005694~chromosome	GO:0005694	chromosome	14	12.844	0.0448112	ENSG00000064195, ENSG00000245848, ENSG00000158828, ENSG00000151623, ENSG00000129194, ENSG00000137834, ENSG00000167081, ENSG00000269466, ENSG00000169136, ENSG00000168496, ENSG00000108001, ENSG00000101665, ENSG00000108592, ENSG00000120693	73	1870	17223	1.76633	0.858898
GO TERM: CC	GO:0034774~secretory granule lumen	GO:0034774	secretory granule lumen	5	4.58716	0.0458193	ENSG00000115263, ENSG00000120885, ENSG00000116260, ENSG00000013364, ENSG00000163631	73	322	17223	3.66353	0.858898
GO TERM: CC	GO:0044427~chromosomal part	GO:0044427	chromosomal part	13	11.9266	0.046842	ENSG00000064195, ENSG00000245848, ENSG00000158828, ENSG00000151623, ENSG00000129194, ENSG00000137834, ENSG00000167081, ENSG00000269466, ENSG00000169136, ENSG00000168496, ENSG00000108001, ENSG00000101665, ENSG00000120693	73	1691	17223	1.81378	0.858898
GO TERM: BP	GO:0010628~positive regulation of gene expression	GO:0010628	positive regulation of gene expression	20	18.3486	0.00198425	ENSG00000064195, ENSG00000245848, ENSG00000158828, ENSG00000172201, ENSG00000117318, ENSG00000129194, ENSG00000138668, ENSG00000137834, ENSG00000167081, ENSG00000130164, ENSG00000120885, ENSG00000169136, ENSG00000157240, ENSG00000253626, ENSG00000125968, ENSG00000184110, ENSG00000162545, ENSG00000108001, ENSG00000101665, ENSG00000120693	82	2239	19277	2.09991	0.892118
GO TERM: BP	GO:0030514~negative regulation of BMP signaling pathway	GO:0030514	negative regulation of BMP signaling pathway	4	3.66972	0.00319513	ENSG00000157240, ENSG00000101665, ENSG00000137834, ENSG00000120693	82	70	19277	13.4334	0.892118
GO TERM: BP	GO:0001649~osteoblast differentiation	GO:0001649	osteoblast differentiation	6	5.50459	0.00329035	ENSG00000245848, ENSG00000157240, ENSG00000172201, ENSG00000117318, ENSG00000146674, ENSG00000137834	82	238	19277	5.92652	0.892118
GO TERM: BP	GO:0051338~regulation of transferase activity	GO:0051338	regulation of transferase activity	12	11.0092	0.00393984	ENSG00000268606, ENSG00000158050, ENSG00000245848, ENSG00000115263, ENSG00000120885, ENSG00000113070, ENSG00000158828, ENSG00000162545, ENSG00000138668, ENSG00000163888, ENSG00000101665, ENSG00000013364	82	1036	19277	2.723	0.892118
GO TERM: BP	GO:0045936~negative regulation of phosphate metabolic process	GO:0045936	negative regulation of phosphate metabolic process	9	8.25688	0.00452259	ENSG00000158050, ENSG00000245848, ENSG00000158828, ENSG00000162545, ENSG00000163888, ENSG00000101665, ENSG00000146674, ENSG00000013364, ENSG00000137834	82	621	19277	3.40703	0.892118
GO TERM: BP	GO:0010563~negative regulation of phosphorus metabolic process	GO:0010563	negative regulation of phosphorus metabolic process	9	8.25688	0.00456615	ENSG00000158050, ENSG00000245848, ENSG00000158828, ENSG00000162545, ENSG00000163888, ENSG00000101665, ENSG00000146674, ENSG00000013364, ENSG00000137834	82	622	19277	3.40156	0.892118
GO TERM: BP	GO:0031324~negative regulation of cellular metabolic process	GO:0031324	negative regulation of cellular metabolic process	25	22.9358	0.00460847	ENSG00000102043, ENSG00000198681, ENSG00000158828, ENSG00000117318, ENSG00000113070, ENSG00000116260, ENSG00000125968, ENSG00000187634, ENSG00000163888, ENSG00000268606, ENSG00000245848, ENSG00000172201, ENSG00000129194, ENSG00000138668, ENSG00000137834, ENSG00000130164, ENSG00000158050, ENSG00000120885, ENSG00000139970, ENSG00000169136, ENSG00000157240, ENSG00000162545, ENSG00000101665, ENSG0000…	82	3354	19277	1.75228	0.892118
GO TERM: BP	GO:0023057~negative regulation of signaling	GO:0023057	negative regulation of signaling	15	13.7615	0.00461639	ENSG00000198681, ENSG00000158828, ENSG00000197457, ENSG00000137834, ENSG00000130164, ENSG00000158050, ENSG00000120885, ENSG00000113070, ENSG00000157240, ENSG00000127955, ENSG00000162545, ENSG00000101665, ENSG00000146674, ENSG00000013364, ENSG00000120693	82	1539	19277	2.29128	0.892118
GO TERM: BP	GO:0031328~positive regulation of cellular biosynthetic process	GO:0031328	positive regulation of cellular biosynthetic process	18	16.5138	0.00695417	ENSG00000064195, ENSG00000245848, ENSG00000158828, ENSG00000172201, ENSG00000129194, ENSG00000138668, ENSG00000137834, ENSG00000167081, ENSG00000130164, ENSG00000120885, ENSG00000115263, ENSG00000169136, ENSG00000157240, ENSG00000253626, ENSG00000184110, ENSG00000108001, ENSG00000101665, ENSG00000120693	82	2140	19277	1.97735	1
GO TERM: BP	GO:0007399~nervous system development	GO:0007399	nervous system development	20	18.3486	0.00805352	ENSG00000108947, ENSG00000172201, ENSG00000117318, ENSG00000138668, ENSG00000197457, ENSG00000167081, ENSG00000151640, ENSG00000117114, ENSG00000175928, ENSG00000169258, ENSG00000120885, ENSG00000139970, ENSG00000169136, ENSG00000135097, ENSG00000157240, ENSG00000183098, ENSG00000125968, ENSG00000124126, ENSG00000182168, ENSG00000129864	82	2541	19277	1.85034	1
GO TERM: BP	GO:0009891~positive regulation of biosynthetic process	GO:0009891	positive regulation of biosynthetic process	18	16.5138	0.00836921	ENSG00000064195, ENSG00000245848, ENSG00000158828, ENSG00000172201, ENSG00000129194, ENSG00000138668, ENSG00000137834, ENSG00000167081, ENSG00000130164, ENSG00000120885, ENSG00000115263, ENSG00000169136, ENSG00000157240, ENSG00000253626, ENSG00000184110, ENSG00000108001, ENSG00000101665, ENSG00000120693	82	2181	19277	1.94018	1
GO TERM: BP	GO:0051348~negative regulation of transferase activity	GO:0051348	negative regulation of transferase activity	6	5.50459	0.00864118	ENSG00000158050, ENSG00000245848, ENSG00000162545, ENSG00000163888, ENSG00000101665, ENSG00000013364	82	300	19277	4.70171	1
GO TERM: BP	GO:0007623~circadian rhythm	GO:0007623	circadian rhythm	5	4.58716	0.00874242	ENSG00000169136, ENSG00000125968, ENSG00000172201, ENSG00000138668, ENSG00000117318	82	192	19277	6.12201	1
GO TERM: BP	GO:0010941~regulation of cell death	GO:0010941	regulation of cell death	16	14.6789	0.00922171	ENSG00000131389, ENSG00000158828, ENSG00000104228, ENSG00000181284, ENSG00000117318, ENSG00000137834, ENSG00000240694, ENSG00000120885, ENSG00000115263, ENSG00000169136, ENSG00000157240, ENSG00000125968, ENSG00000124126, ENSG00000146674, ENSG00000182168, ENSG00000163631	82	1843	19277	2.04089	1
GO TERM: BP	GO:0001503~ossification	GO:0001503	ossification	7	6.42202	0.00956366	ENSG00000245848, ENSG00000157240, ENSG00000172201, ENSG00000117318, ENSG00000101665, ENSG00000146674, ENSG00000137834	82	431	19277	3.81809	1
GO TERM: BP	GO:0051963~regulation of synapse assembly	GO:0051963	regulation of synapse assembly	4	3.66972	0.00959956	ENSG00000175928, ENSG00000157240, ENSG00000183098, ENSG00000117114	82	104	19277	9.04174	1
GO TERM: BP	GO:0034250~positive regulation of cellular amide metabolic process	GO:0034250	positive regulation of cellular amide metabolic process	5	4.58716	0.0103964	ENSG00000120885, ENSG00000158828, ENSG00000253626, ENSG00000184110, ENSG00000138668	82	202	19277	5.81894	1
GO TERM: BP	GO:0001932~regulation of protein phosphorylation	GO:0001932	regulation of protein phosphorylation	14	12.844	0.011033	ENSG00000245848, ENSG00000158828, ENSG00000181284, ENSG00000137834, ENSG00000158050, ENSG00000120885, ENSG00000115263, ENSG00000113070, ENSG00000157240, ENSG00000162545, ENSG00000163888, ENSG00000101665, ENSG00000146674, ENSG00000013364	82	1530	19277	2.15111	1
GO TERM: BP	GO:0042325~regulation of phosphorylation	GO:0042325	regulation of phosphorylation	15	13.7615	0.0110366	ENSG00000245848, ENSG00000158828, ENSG00000181284, ENSG00000137834, ENSG00000198729, ENSG00000158050, ENSG00000120885, ENSG00000115263, ENSG00000113070, ENSG00000157240, ENSG00000162545, ENSG00000163888, ENSG00000101665, ENSG00000146674, ENSG00000013364	82	1704	19277	2.06941	1
GO TERM: BP	GO:0010648~negative regulation of cell communication	GO:0010648	negative regulation of cell communication	14	12.844	0.011319	ENSG00000198681, ENSG00000158828, ENSG00000197457, ENSG00000137834, ENSG00000158050, ENSG00000120885, ENSG00000113070, ENSG00000157240, ENSG00000127955, ENSG00000162545, ENSG00000101665, ENSG00000146674, ENSG00000013364, ENSG00000120693	82	1535	19277	2.1441	1
GO TERM: BP	GO:0030510~regulation of BMP signaling pathway	GO:0030510	regulation of BMP signaling pathway	4	3.66972	0.0125952	ENSG00000157240, ENSG00000101665, ENSG00000137834, ENSG00000120693	82	115	19277	8.17688	1
GO TERM: BP	GO:0051248~negative regulation of protein metabolic process	GO:0051248	negative regulation of protein metabolic process	15	13.7615	0.0128574	ENSG00000268606, ENSG00000245848, ENSG00000158828, ENSG00000138668, ENSG00000137834, ENSG00000130164, ENSG00000158050, ENSG00000120885, ENSG00000139970, ENSG00000113070, ENSG00000162545, ENSG00000163888, ENSG00000101665, ENSG00000146674, ENSG00000013364	82	1736	19277	2.03127	1
GO TERM: MF	GO:0031625~ubiquitin protein ligase binding	GO:0031625	ubiquitin protein ligase binding	6	5.50459	0.0128695	ENSG00000268606, ENSG00000274276, ENSG00000120885, ENSG00000158828, ENSG00000101665, ENSG00000137834	78	303	16739	4.24956	1
GO TERM: BP	GO:0019220~regulation of phosphate metabolic process	GO:0019220	regulation of phosphate metabolic process	16	14.6789	0.0130906	ENSG00000245848, ENSG00000158828, ENSG00000181284, ENSG00000137834, ENSG00000130164, ENSG00000198729, ENSG00000158050, ENSG00000120885, ENSG00000115263, ENSG00000113070, ENSG00000157240, ENSG00000162545, ENSG00000163888, ENSG00000101665, ENSG00000146674, ENSG00000013364	82	1919	19277	1.96007	1
GO TERM: BP	GO:0051174~regulation of phosphorus metabolic process	GO:0051174	regulation of phosphorus metabolic process	16	14.6789	0.0136229	ENSG00000245848, ENSG00000158828, ENSG00000181284, ENSG00000137834, ENSG00000130164, ENSG00000198729, ENSG00000158050, ENSG00000120885, ENSG00000115263, ENSG00000113070, ENSG00000157240, ENSG00000162545, ENSG00000163888, ENSG00000101665, ENSG00000146674, ENSG00000013364	82	1928	19277	1.95092	1
GO TERM: MF	GO:0008427~calcium-dependent protein kinase inhibitor activity	GO:0008427	calcium-dependent protein kinase inhibitor activity	2	1.83486	0.0137375	ENSG00000162545, ENSG00000163888	78	3	16739	143.068	1
GO TERM: BP	GO:0007417~central nervous system development	GO:0007417	central nervous system development	11	10.0917	0.014304	ENSG00000120885, ENSG00000169136, ENSG00000157240, ENSG00000125968, ENSG00000172201, ENSG00000138668, ENSG00000117318, ENSG00000182168, ENSG00000167081, ENSG00000117114, ENSG00000129864	82	1074	19277	2.40776	1
GO TERM: BP	GO:0009968~negative regulation of signal transduction	GO:0009968	negative regulation of signal transduction	13	11.9266	0.0157067	ENSG00000198681, ENSG00000158828, ENSG00000197457, ENSG00000137834, ENSG00000158050, ENSG00000120885, ENSG00000113070, ENSG00000157240, ENSG00000162545, ENSG00000101665, ENSG00000146674, ENSG00000013364, ENSG00000120693	82	1427	19277	2.14163	1
GO TERM: BP	GO:0016310~phosphorylation	GO:0016310	phosphorylation	19	17.4312	0.0159365	ENSG00000134326, ENSG00000245848, ENSG00000175283, ENSG00000158828, ENSG00000181284, ENSG00000137834, ENSG00000197417, ENSG00000158050, ENSG00000120885, ENSG00000115263, ENSG00000113070, ENSG00000157240, ENSG00000162545, ENSG00000163888, ENSG00000101665, ENSG00000146674, ENSG00000013364, ENSG00000069020, ENSG00000275993	82	2525	19277	1.76896	1
GO TERM: BP	GO:0010942~positive regulation of cell death	GO:0010942	positive regulation of cell death	9	8.25688	0.0160187	ENSG00000131389, ENSG00000120885, ENSG00000158828, ENSG00000104228, ENSG00000117318, ENSG00000124126, ENSG00000146674, ENSG00000182168, ENSG00000240694	82	775	19277	2.73002	1
GO TERM: MF	GO:0044389~ubiquitin-like protein ligase binding	GO:0044389	ubiquitin-like protein ligase binding	6	5.50459	0.0163478	ENSG00000268606, ENSG00000274276, ENSG00000120885, ENSG00000158828, ENSG00000101665, ENSG00000137834	78	322	16739	3.99881	1
GO TERM: BP	GO:0006469~negative regulation of protein kinase activity	GO:0006469	negative regulation of protein kinase activity	5	4.58716	0.016532	ENSG00000158050, ENSG00000245848, ENSG00000162545, ENSG00000163888, ENSG00000013364	82	232	19277	5.06649	1
GO TERM: BP	GO:0009892~negative regulation of metabolic process	GO:0009892	negative regulation of metabolic process	25	22.9358	0.0170135	ENSG00000102043, ENSG00000198681, ENSG00000158828, ENSG00000117318, ENSG00000113070, ENSG00000116260, ENSG00000125968, ENSG00000187634, ENSG00000163888, ENSG00000268606, ENSG00000245848, ENSG00000172201, ENSG00000129194, ENSG00000138668, ENSG00000137834, ENSG00000130164, ENSG00000158050, ENSG00000120885, ENSG00000139970, ENSG00000169136, ENSG00000157240, ENSG00000162545, ENSG00000101665, ENSG0000…	82	3729	19277	1.57606	1
GO TERM: BP	GO:0009605~response to external stimulus	GO:0009605	response to external stimulus	21	19.2661	0.0171435	ENSG00000134326, ENSG00000245848, ENSG00000108947, ENSG00000170044, ENSG00000181284, ENSG00000129194, ENSG00000137834, ENSG00000130164, ENSG00000151640, ENSG00000197417, ENSG00000117114, ENSG00000274276, ENSG00000120885, ENSG00000115263, ENSG00000113070, ENSG00000162545, ENSG00000124126, ENSG00000185201, ENSG00000182168, ENSG00000163631, ENSG00000275993	82	2932	19277	1.68376	1
GO TERM: BP	GO:0030182~neuron differentiation	GO:0030182	neuron differentiation	13	11.9266	0.0178724	ENSG00000108947, ENSG00000172201, ENSG00000117318, ENSG00000197457, ENSG00000167081, ENSG00000151640, ENSG00000169258, ENSG00000139970, ENSG00000169136, ENSG00000157240, ENSG00000125968, ENSG00000124126, ENSG00000182168	82	1453	19277	2.10331	1
GO TERM: MF	GO:0010858~calcium-dependent protein kinase regulator activity	GO:0010858	calcium-dependent protein kinase regulator activity	2	1.83486	0.0182752	ENSG00000162545, ENSG00000163888	78	4	16739	107.301	1
GO TERM: BP	GO:0008219~cell death	GO:0008219	cell death	18	16.5138	0.0184148	ENSG00000131389, ENSG00000107338, ENSG00000158828, ENSG00000104228, ENSG00000181284, ENSG00000117318, ENSG00000137834, ENSG00000151640, ENSG00000240694, ENSG00000120885, ENSG00000115263, ENSG00000169136, ENSG00000157240, ENSG00000125968, ENSG00000124126, ENSG00000146674, ENSG00000182168, ENSG00000163631	82	2373	19277	1.7832	1
GO TERM: BP	GO:0045859~regulation of protein kinase activity	GO:0045859	regulation of protein kinase activity	9	8.25688	0.0187611	ENSG00000158050, ENSG00000245848, ENSG00000115263, ENSG00000120885, ENSG00000113070, ENSG00000158828, ENSG00000162545, ENSG00000163888, ENSG00000013364	82	798	19277	2.65134	1
GO TERM: BP	GO:0033043~regulation of organelle organization	GO:0033043	regulation of organelle organization	13	11.9266	0.0188541	ENSG00000123094, ENSG00000158828, ENSG00000181284, ENSG00000138668, ENSG00000197457, ENSG00000134775, ENSG00000120885, ENSG00000115263, ENSG00000169136, ENSG00000125968, ENSG00000168496, ENSG00000127955, ENSG00000124126	82	1464	19277	2.08751	1
GO TERM: BP	GO:0044087~regulation of cellular component biogenesis	GO:0044087	regulation of cellular component biogenesis	11	10.0917	0.0197177	ENSG00000175928, ENSG00000245848, ENSG00000120885, ENSG00000158828, ENSG00000157240, ENSG00000183098, ENSG00000125968, ENSG00000124126, ENSG00000137834, ENSG00000134775, ENSG00000117114	82	1130	19277	2.28844	1
GO TERM: BP	GO:0042981~regulation of apoptotic process	GO:0042981	regulation of apoptotic process	14	12.844	0.0200993	ENSG00000158828, ENSG00000104228, ENSG00000181284, ENSG00000117318, ENSG00000137834, ENSG00000240694, ENSG00000120885, ENSG00000115263, ENSG00000169136, ENSG00000125968, ENSG00000124126, ENSG00000146674, ENSG00000182168, ENSG00000163631	82	1655	19277	1.98864	1
GO TERM: BP	GO:0007420~brain development	GO:0007420	brain development	9	8.25688	0.020186	ENSG00000169136, ENSG00000157240, ENSG00000125968, ENSG00000172201, ENSG00000138668, ENSG00000182168, ENSG00000167081, ENSG00000117114, ENSG00000129864	82	809	19277	2.61529	1
GO TERM: BP	GO:0010604~positive regulation of macromolecule metabolic process	GO:0010604	positive regulation of macromolecule metabolic process	24	22.0183	0.0206316	ENSG00000268606, ENSG00000064195, ENSG00000245848, ENSG00000158828, ENSG00000172201, ENSG00000117318, ENSG00000129194, ENSG00000138668, ENSG00000137834, ENSG00000167081, ENSG00000130164, ENSG00000120885, ENSG00000115263, ENSG00000113070, ENSG00000169136, ENSG00000157240, ENSG00000253626, ENSG00000125968, ENSG00000184110, ENSG00000162545, ENSG00000108001, ENSG00000101665, ENSG00000146674, ENSG0000…	82	3588	19277	1.57248	1
GO TERM: MF	GO:0003682~chromatin binding	GO:0003682	chromatin binding	8	7.33945	0.0207914	ENSG00000064195, ENSG00000245848, ENSG00000169136, ENSG00000187634, ENSG00000138668, ENSG00000129194, ENSG00000137834, ENSG00000269466	78	603	16739	2.84713	1
GO TERM: MF	GO:0000287~magnesium ion binding	GO:0000287	magnesium ion binding	5	4.58716	0.0212343	ENSG00000158828, ENSG00000168496, ENSG00000127955, ENSG00000069020, ENSG00000275993	78	229	16739	4.68565	1
GO TERM: BP	GO:1903362~regulation of cellular protein catabolic process	GO:1903362	regulation of cellular protein catabolic process	5	4.58716	0.0225104	ENSG00000245848, ENSG00000120885, ENSG00000158828, ENSG00000101665, ENSG00000130164	82	255	19277	4.60952	1
GO TERM: BP	GO:0033673~negative regulation of kinase activity	GO:0033673	negative regulation of kinase activity	5	4.58716	0.0225104	ENSG00000158050, ENSG00000245848, ENSG00000162545, ENSG00000163888, ENSG00000013364	82	255	19277	4.60952	1
GO TERM: BP	GO:0031398~positive regulation of protein ubiquitination	GO:0031398	positive regulation of protein ubiquitination	4	3.66972	0.0228065	ENSG00000268606, ENSG00000120885, ENSG00000158828, ENSG00000101665	82	144	19277	6.53015	1
GO TERM: BP	GO:0071396~cellular response to lipid	GO:0071396	cellular response to lipid	8	7.33945	0.0231335	ENSG00000134326, ENSG00000120885, ENSG00000151623, ENSG00000127955, ENSG00000138668, ENSG00000117318, ENSG00000130164, ENSG00000197417	82	674	19277	2.79033	1
GO TERM: BP	GO:0043067~regulation of programmed cell death	GO:0043067	regulation of programmed cell death	14	12.844	0.0232432	ENSG00000158828, ENSG00000104228, ENSG00000181284, ENSG00000117318, ENSG00000137834, ENSG00000240694, ENSG00000120885, ENSG00000115263, ENSG00000169136, ENSG00000125968, ENSG00000124126, ENSG00000146674, ENSG00000182168, ENSG00000163631	82	1688	19277	1.94976	1
GO TERM: BP	GO:0006468~protein phosphorylation	GO:0006468	protein phosphorylation	16	14.6789	0.025946	ENSG00000245848, ENSG00000158828, ENSG00000181284, ENSG00000137834, ENSG00000158050, ENSG00000120885, ENSG00000115263, ENSG00000113070, ENSG00000157240, ENSG00000162545, ENSG00000163888, ENSG00000101665, ENSG00000146674, ENSG00000013364, ENSG00000069020, ENSG00000275993	82	2085	19277	1.80401	1
GO TERM: BP	GO:0006796~phosphate-containing compound metabolic process	GO:0006796	phosphate-containing compound metabolic process	23	21.1009	0.0261673	ENSG00000102043, ENSG00000134326, ENSG00000245848, ENSG00000175283, ENSG00000158828, ENSG00000181284, ENSG00000137834, ENSG00000130164, ENSG00000197417, ENSG00000198729, ENSG00000158050, ENSG00000120885, ENSG00000115263, ENSG00000113070, ENSG00000157240, ENSG00000162545, ENSG00000163888, ENSG00000101665, ENSG00000146674, ENSG00000013364, ENSG00000069020, ENSG00000275993, ENSG00000070778	82	3463	19277	1.56135	1
GO TERM: BP	GO:0010605~negative regulation of macromolecule metabolic process	GO:0010605	negative regulation of macromolecule metabolic process	23	21.1009	0.0269602	ENSG00000268606, ENSG00000245848, ENSG00000198681, ENSG00000158828, ENSG00000172201, ENSG00000117318, ENSG00000129194, ENSG00000138668, ENSG00000137834, ENSG00000130164, ENSG00000158050, ENSG00000120885, ENSG00000139970, ENSG00000113070, ENSG00000169136, ENSG00000157240, ENSG00000125968, ENSG00000187634, ENSG00000162545, ENSG00000163888, ENSG00000101665, ENSG00000146674, ENSG00000013364	82	3473	19277	1.55686	1
GO TERM: BP	GO:1903364~positive regulation of cellular protein catabolic process	GO:1903364	positive regulation of cellular protein catabolic process	4	3.66972	0.0271182	ENSG00000245848, ENSG00000120885, ENSG00000101665, ENSG00000130164	82	154	19277	6.10611	1
GO TERM: BP	GO:0060322~head development	GO:0060322	head development	9	8.25688	0.0271552	ENSG00000169136, ENSG00000157240, ENSG00000125968, ENSG00000172201, ENSG00000138668, ENSG00000182168, ENSG00000167081, ENSG00000117114, ENSG00000129864	82	856	19277	2.47169	1
GO TERM: BP	GO:0051438~regulation of ubiquitin-protein transferase activity	GO:0051438	regulation of ubiquitin-protein transferase activity	3	2.75229	0.027195	ENSG00000268606, ENSG00000158828, ENSG00000101665	82	61	19277	11.5616	1
GO TERM: BP	GO:0043030~regulation of macrophage activation	GO:0043030	regulation of macrophage activation	3	2.75229	0.0280261	ENSG00000245848, ENSG00000130164, ENSG00000197417	82	62	19277	11.3751	1
GO TERM: BP	GO:0090101~negative regulation of transmembrane receptor protein serine/threonine kinase signaling pathway	GO:0090101	negative regulation of transmembrane receptor protein serine/threonine kinase signaling pathway	4	3.66972	0.0280293	ENSG00000157240, ENSG00000101665, ENSG00000137834, ENSG00000120693	82	156	19277	6.02783	1
GO TERM: BP	GO:0043065~positive regulation of apoptotic process	GO:0043065	positive regulation of apoptotic process	8	7.33945	0.0282602	ENSG00000120885, ENSG00000158828, ENSG00000104228, ENSG00000117318, ENSG00000124126, ENSG00000146674, ENSG00000182168, ENSG00000240694	82	703	19277	2.67522	1
GO TERM: BP	GO:0022008~neurogenesis	GO:0022008	neurogenesis	14	12.844	0.0288122	ENSG00000108947, ENSG00000172201, ENSG00000117318, ENSG00000197457, ENSG00000167081, ENSG00000151640, ENSG00000169258, ENSG00000120885, ENSG00000139970, ENSG00000169136, ENSG00000157240, ENSG00000125968, ENSG00000124126, ENSG00000182168	82	1739	19277	1.89258	1
GO TERM: BP	GO:0060395~SMAD protein signal transduction	GO:0060395	SMAD protein signal transduction	3	2.75229	0.0288674	ENSG00000101665, ENSG00000137834, ENSG00000120693	82	63	19277	11.1945	1
GO TERM: BP	GO:0065009~regulation of molecular function	GO:0065009	regulation of molecular function	22	20.1835	0.0296006	ENSG00000268606, ENSG00000245848, ENSG00000158828, ENSG00000117318, ENSG00000138668, ENSG00000197457, ENSG00000172348, ENSG00000198729, ENSG00000158050, ENSG00000120885, ENSG00000115263, ENSG00000113070, ENSG00000157240, ENSG00000125968, ENSG00000184110, ENSG00000234965, ENSG00000162545, ENSG00000124126, ENSG00000163888, ENSG00000101665, ENSG00000146674, ENSG00000013364	82	3301	19277	1.56676	1
GO TERM: BP	GO:0043068~positive regulation of programmed cell death	GO:0043068	positive regulation of programmed cell death	8	7.33945	0.0298009	ENSG00000120885, ENSG00000158828, ENSG00000104228, ENSG00000117318, ENSG00000124126, ENSG00000146674, ENSG00000182168, ENSG00000240694	82	711	19277	2.64512	1
GO TERM: BP	GO:0030509~BMP signaling pathway	GO:0030509	BMP signaling pathway	4	3.66972	0.0303778	ENSG00000157240, ENSG00000101665, ENSG00000137834, ENSG00000120693	82	161	19277	5.84063	1
GO TERM: BP	GO:1903322~positive regulation of protein modification by small protein conjugation or removal	GO:1903322	positive regulation of protein modification by small protein conjugation or removal	4	3.66972	0.0318354	ENSG00000268606, ENSG00000120885, ENSG00000158828, ENSG00000101665	82	164	19277	5.73379	1
GO TERM: MF	GO:0019899~enzyme binding	GO:0019899	enzyme binding	17	15.5963	0.0325881	ENSG00000268606, ENSG00000245848, ENSG00000198681, ENSG00000158828, ENSG00000138668, ENSG00000137834, ENSG00000130164, ENSG00000274276, ENSG00000158050, ENSG00000120885, ENSG00000169136, ENSG00000162545, ENSG00000124126, ENSG00000163888, ENSG00000101665, ENSG00000013364, ENSG00000182168	78	2141	16739	1.70399	1
GO TERM: BP	GO:0031399~regulation of protein modification process	GO:0031399	regulation of protein modification process	15	13.7615	0.0326335	ENSG00000268606, ENSG00000245848, ENSG00000158828, ENSG00000181284, ENSG00000137834, ENSG00000158050, ENSG00000120885, ENSG00000115263, ENSG00000113070, ENSG00000157240, ENSG00000162545, ENSG00000163888, ENSG00000101665, ENSG00000146674, ENSG00000013364	82	1957	19277	1.80188	1
GO TERM: BP	GO:1901701~cellular response to oxygen-containing compound	GO:1901701	cellular response to oxygen-containing compound	11	10.0917	0.032945	ENSG00000134326, ENSG00000115263, ENSG00000120885, ENSG00000158828, ENSG00000125968, ENSG00000127955, ENSG00000162545, ENSG00000138668, ENSG00000117318, ENSG00000130164, ENSG00000197417	82	1230	19277	2.10239	1
GO TERM: BP	GO:0032922~circadian regulation of gene expression	GO:0032922	circadian regulation of gene expression	3	2.75229	0.0341228	ENSG00000125968, ENSG00000172201, ENSG00000117318	82	69	19277	10.2211	1
GO TERM: BP	GO:0045727~positive regulation of translation	GO:0045727	positive regulation of translation	4	3.66972	0.0343451	ENSG00000158828, ENSG00000253626, ENSG00000184110, ENSG00000138668	82	169	19277	5.56415	1
GO TERM: BP	GO:0006793~phosphorus metabolic process	GO:0006793	phosphorus metabolic process	23	21.1009	0.0348705	ENSG00000102043, ENSG00000134326, ENSG00000245848, ENSG00000175283, ENSG00000158828, ENSG00000181284, ENSG00000137834, ENSG00000130164, ENSG00000197417, ENSG00000198729, ENSG00000158050, ENSG00000120885, ENSG00000115263, ENSG00000113070, ENSG00000157240, ENSG00000162545, ENSG00000163888, ENSG00000101665, ENSG00000146674, ENSG00000013364, ENSG00000069020, ENSG00000275993, ENSG00000070778	82	3562	19277	1.51796	1
GO TERM: BP	GO:0006915~apoptotic process	GO:0006915	apoptotic process	15	13.7615	0.0349047	ENSG00000107338, ENSG00000158828, ENSG00000104228, ENSG00000181284, ENSG00000117318, ENSG00000137834, ENSG00000240694, ENSG00000120885, ENSG00000115263, ENSG00000169136, ENSG00000125968, ENSG00000124126, ENSG00000146674, ENSG00000182168, ENSG00000163631	82	1975	19277	1.78546	1
GO TERM: BP	GO:0050807~regulation of synapse organization	GO:0050807	regulation of synapse organization	4	3.66972	0.0353771	ENSG00000175928, ENSG00000157240, ENSG00000183098, ENSG00000117114	82	171	19277	5.49907	1
GO TERM: BP	GO:0010557~positive regulation of macromolecule biosynthetic process	GO:0010557	positive regulation of macromolecule biosynthetic process	15	13.7615	0.0363487	ENSG00000064195, ENSG00000245848, ENSG00000158828, ENSG00000172201, ENSG00000129194, ENSG00000138668, ENSG00000137834, ENSG00000167081, ENSG00000169136, ENSG00000157240, ENSG00000253626, ENSG00000184110, ENSG00000108001, ENSG00000101665, ENSG00000120693	82	1986	19277	1.77557	1
GO TERM: BP	GO:0071773~cellular response to BMP stimulus	GO:0071773	cellular response to BMP stimulus	4	3.66972	0.036425	ENSG00000157240, ENSG00000101665, ENSG00000137834, ENSG00000120693	82	173	19277	5.4355	1
GO TERM: BP	GO:0071772~response to BMP	GO:0071772	response to BMP	4	3.66972	0.036425	ENSG00000157240, ENSG00000101665, ENSG00000137834, ENSG00000120693	82	173	19277	5.4355	1
GO TERM: BP	GO:0043549~regulation of kinase activity	GO:0043549	regulation of kinase activity	9	8.25688	0.0366606	ENSG00000158050, ENSG00000245848, ENSG00000115263, ENSG00000120885, ENSG00000113070, ENSG00000158828, ENSG00000162545, ENSG00000163888, ENSG00000013364	82	908	19277	2.33014	1
GO TERM: BP	GO:0007416~synapse assembly	GO:0007416	synapse assembly	4	3.66972	0.0369549	ENSG00000175928, ENSG00000157240, ENSG00000183098, ENSG00000117114	82	174	19277	5.40426	1
GO TERM: BP	GO:0060411~cardiac septum morphogenesis	GO:0060411	cardiac septum morphogenesis	3	2.75229	0.0378173	ENSG00000157240, ENSG00000101665, ENSG00000137834	82	73	19277	9.66104	1
GO TERM: BP	GO:0051493~regulation of cytoskeleton organization	GO:0051493	regulation of cytoskeleton organization	7	6.42202	0.0385491	ENSG00000123094, ENSG00000169136, ENSG00000125968, ENSG00000127955, ENSG00000124126, ENSG00000197457, ENSG00000134775	82	593	19277	2.77504	1
GO TERM: BP	GO:0003281~ventricular septum development	GO:0003281	ventricular septum development	3	2.75229	0.0387639	ENSG00000157240, ENSG00000101665, ENSG00000137834	82	74	19277	9.53049	1
GO TERM: BP	GO:0048699~generation of neurons	GO:0048699	generation of neurons	13	11.9266	0.0391044	ENSG00000108947, ENSG00000172201, ENSG00000117318, ENSG00000197457, ENSG00000167081, ENSG00000151640, ENSG00000169258, ENSG00000139970, ENSG00000169136, ENSG00000157240, ENSG00000125968, ENSG00000124126, ENSG00000182168	82	1630	19277	1.87491	1
GO TERM: BP	GO:0031329~regulation of cellular catabolic process	GO:0031329	regulation of cellular catabolic process	8	7.33945	0.0404923	ENSG00000102043, ENSG00000245848, ENSG00000120885, ENSG00000158828, ENSG00000116260, ENSG00000138668, ENSG00000101665, ENSG00000130164	82	760	19277	2.47458	1
GO TERM: BP	GO:0007167~enzyme linked receptor protein signaling pathway	GO:0007167	enzyme linked receptor protein signaling pathway	10	9.17431	0.04147	ENSG00000107338, ENSG00000108947, ENSG00000113070, ENSG00000157240, ENSG00000125968, ENSG00000101665, ENSG00000146674, ENSG00000013364, ENSG00000137834, ENSG00000120693	82	1103	19277	2.13133	1
GO TERM: BP	GO:0050803~regulation of synapse structure or activity	GO:0050803	regulation of synapse structure or activity	4	3.66972	0.0419021	ENSG00000175928, ENSG00000157240, ENSG00000183098, ENSG00000117114	82	183	19277	5.13848	1
GO TERM: BP	GO:0006366~transcription from RNA polymerase II promoter	GO:0006366	transcription from RNA polymerase II promoter	16	14.6789	0.0422421	ENSG00000268606, ENSG00000064195, ENSG00000245848, ENSG00000198681, ENSG00000172201, ENSG00000151623, ENSG00000117318, ENSG00000129194, ENSG00000138668, ENSG00000137834, ENSG00000167081, ENSG00000169136, ENSG00000157240, ENSG00000125968, ENSG00000101665, ENSG00000120693	82	2221	19277	1.69355	1
GO TERM: BP	GO:0051130~positive regulation of cellular component organization	GO:0051130	positive regulation of cellular component organization	12	11.0092	0.0427731	ENSG00000175928, ENSG00000245848, ENSG00000115263, ENSG00000120885, ENSG00000158828, ENSG00000157240, ENSG00000253626, ENSG00000125968, ENSG00000168496, ENSG00000138668, ENSG00000124126, ENSG00000117114	82	1468	19277	1.92168	1
GO TERM: BP	GO:0006357~regulation of transcription from RNA polymerase II promoter	GO:0006357	regulation of transcription from RNA polymerase II promoter	19	17.4312	0.0435065	ENSG00000268606, ENSG00000064195, ENSG00000245848, ENSG00000152475, ENSG00000198681, ENSG00000170260, ENSG00000172201, ENSG00000151623, ENSG00000117318, ENSG00000129194, ENSG00000138668, ENSG00000137834, ENSG00000167081, ENSG00000169136, ENSG00000157240, ENSG00000125968, ENSG00000108001, ENSG00000101665, ENSG00000120693	82	2824	19277	1.58166	1
GO TERM: BP	GO:0061136~regulation of proteasomal protein catabolic process	GO:0061136	regulation of proteasomal protein catabolic process	4	3.66972	0.0436219	ENSG00000245848, ENSG00000120885, ENSG00000158828, ENSG00000101665	82	186	19277	5.0556	1
GO TERM: MF	GO:0034713~type I transforming growth factor beta receptor binding	GO:0034713	type I transforming growth factor beta receptor binding	2	1.83486	0.0450716	ENSG00000101665, ENSG00000137834	78	10	16739	42.9205	1
GO TERM: BP	GO:0051173~positive regulation of nitrogen compound metabolic process	GO:0051173	positive regulation of nitrogen compound metabolic process	16	14.6789	0.0466642	ENSG00000064195, ENSG00000245848, ENSG00000158828, ENSG00000172201, ENSG00000129194, ENSG00000138668, ENSG00000137834, ENSG00000167081, ENSG00000120885, ENSG00000169136, ENSG00000157240, ENSG00000253626, ENSG00000184110, ENSG00000108001, ENSG00000101665, ENSG00000120693	82	2251	19277	1.67098	1
GO TERM: BP	GO:0070887~cellular response to chemical stimulus	GO:0070887	cellular response to chemical stimulus	22	20.1835	0.0472247	ENSG00000134326, ENSG00000245848, ENSG00000158828, ENSG00000151623, ENSG00000181284, ENSG00000117318, ENSG00000138668, ENSG00000137834, ENSG00000130164, ENSG00000197417, ENSG00000120885, ENSG00000115263, ENSG00000113070, ENSG00000157240, ENSG00000125968, ENSG00000127955, ENSG00000162545, ENSG00000124126, ENSG00000185201, ENSG00000101665, ENSG00000182168, ENSG00000120693	82	3466	19277	1.49217	1
GO TERM: BP	GO:0051090~regulation of sequence-specific DNA binding transcription factor activity	GO:0051090	regulation of sequence-specific DNA binding transcription factor activity	6	5.50459	0.0478497	ENSG00000120885, ENSG00000158828, ENSG00000157240, ENSG00000125968, ENSG00000117318, ENSG00000101665	82	470	19277	3.00109	1
GO TERM: BP	GO:0051253~negative regulation of RNA metabolic process	GO:0051253	negative regulation of RNA metabolic process	12	11.0092	0.049472	ENSG00000268606, ENSG00000245848, ENSG00000198681, ENSG00000169136, ENSG00000157240, ENSG00000125968, ENSG00000172201, ENSG00000187634, ENSG00000138668, ENSG00000117318, ENSG00000129194, ENSG00000101665	82	1504	19277	1.87568	1
GO TERM: BP	GO:0030279~negative regulation of ossification	GO:0030279	negative regulation of ossification	3	2.75229	0.0497526	ENSG00000117318, ENSG00000101665, ENSG00000137834	82	85	19277	8.29713	1

## Sheet: KEGG
Category	Term	ID	Pathway	Count	%	PValue	Genes	List Total	Pop Hits	Pop Total	Fold Enrichment	Benjamini padj
KEGG_PATHWAY	hsa04350:TGF-beta signaling pathway	hsa04350	TGF-beta signaling pathway	6	5.50459	7.91553e-05	ENSG00000125968, ENSG00000172201, ENSG00000117318, ENSG00000101665, ENSG00000137834, ENSG00000120693	40	94	8112	12.9447	0.00846962
KEGG_PATHWAY	hsa04550:Signaling pathways regulating pluripotency of stem cells	hsa04550	Signaling pathways regulating pluripotency of stem cells	5	4.58716	0.0047185	ENSG00000157240, ENSG00000125968, ENSG00000172201, ENSG00000117318, ENSG00000120693	40	143	8112	7.09091	0.25244

## Sheet: Reactome
Category	Term	ID	Pathway	Count	%	PValue	Genes	List Total	Pop Hits	Pop Total	Fold Enrichment	Benjamini padj
REACTOME_PATHWAY	R-HSA-201451~Signaling by BMP	R-HSA-201451	Signaling by BMP	3	2.75229	0.00712137	ENSG00000101665, ENSG00000137834, ENSG00000120693	49	28	10538	23.0423	1
REACTOME_PATHWAY	R-HSA-9031628~NGF-stimulated transcription	R-HSA-9031628	NGF-stimulated transcription	3	2.75229	0.0135237	ENSG00000125968, ENSG00000172201, ENSG00000117318	49	39	10538	16.5432	1
REACTOME_PATHWAY	R-HSA-198725~Nuclear Events (kinase and transcription factor activation)	R-HSA-198725	Nuclear Events (kinase and transcription factor activation)	3	2.75229	0.0313528	ENSG00000125968, ENSG00000172201, ENSG00000117318	49	61	10538	10.5768	1
