# Supplementary material for: Culture of Cancer Cells at Physiological Oxygen Levels Affects Gene Expression in a Cell-Type Specific Manner
Source: Preprints.org preprint supplement (doi:10.20944/preprints202208.0497.v1), 2022-08-29
Supplement: Supplementary file 11 [file Table S7 Functional Enrichent Huh-7 5% O2.xlsx]

## Sheet: GO
Category	Term	ID	Name	Count	%	PValue	Genes	List Total	Pop Hits	Pop Total	Fold Enrichment	Benjamini padj
GO TERM: CC	GO:0044421~extracellular region part	GO:0044421	extracellular region part	163	33.1976	2.2978e-16	ENSG00000183801, ENSG00000155850, ENSG00000106688, ENSG00000197375, ENSG00000150281, ENSG00000138315, ENSG00000135047, ENSG00000211645, ENSG00000145536, ENSG00000117298, ENSG00000183098, ENSG00000108187, ENSG00000050165, ENSG00000099937, ENSG00000132744, ENSG00000179399, ENSG00000104537, ENSG00000173213, ENSG00000104419, ENSG00000157502, ENSG00000172638, ENSG00000163131, ENSG00000158270, ENSG0000…	396	3919	17223	1.80895	1.34191e-13
GO TERM: CC	GO:0005576~extracellular region	GO:0005576	extracellular region	178	36.2525	9.95143e-14	ENSG00000183801, ENSG00000181104, ENSG00000155850, ENSG00000106688, ENSG00000197375, ENSG00000150281, ENSG00000138315, ENSG00000135047, ENSG00000211645, ENSG00000145536, ENSG00000117298, ENSG00000183098, ENSG00000108187, ENSG00000050165, ENSG00000099937, ENSG00000132744, ENSG00000179399, ENSG00000104537, ENSG00000169231, ENSG00000173213, ENSG00000104419, ENSG00000150551, ENSG00000157502, ENSG0000…	396	4751	17223	1.62948	2.90582e-11
GO TERM: CC	GO:0005615~extracellular space	GO:0005615	extracellular space	99	20.1629	4.2384e-13	ENSG00000183801, ENSG00000150281, ENSG00000138315, ENSG00000135047, ENSG00000211645, ENSG00000183098, ENSG00000050165, ENSG00000099937, ENSG00000179399, ENSG00000104537, ENSG00000172638, ENSG00000163131, ENSG00000158270, ENSG00000121858, ENSG00000123999, ENSG00000187045, ENSG00000131094, ENSG00000143869, ENSG00000144152, ENSG00000010319, ENSG00000163898, ENSG00000125650, ENSG00000186910, ENSG0000…	396	2041	17223	2.10963	8.25076e-11
GO TERM: BP	GO:0030198~extracellular matrix organization	GO:0030198	extracellular matrix organization	35	7.12831	3.99402e-11	ENSG00000105971, ENSG00000161638, ENSG00000111799, ENSG00000106823, ENSG00000072682, ENSG00000106624, ENSG00000112769, ENSG00000039068, ENSG00000135047, ENSG00000134013, ENSG00000115414, ENSG00000145536, ENSG00000138131, ENSG00000049089, ENSG00000187955, ENSG00000163346, ENSG00000146197, ENSG00000140092, ENSG00000105707, ENSG00000152952, ENSG00000204580, ENSG00000113140, ENSG00000163131, ENSG0000…	411	426	19277	3.85351	1.20653e-07
GO TERM: BP	GO:0043062~extracellular structure organization	GO:0043062	extracellular structure organization	35	7.12831	4.28379e-11	ENSG00000105971, ENSG00000161638, ENSG00000111799, ENSG00000106823, ENSG00000072682, ENSG00000106624, ENSG00000112769, ENSG00000039068, ENSG00000135047, ENSG00000134013, ENSG00000115414, ENSG00000145536, ENSG00000138131, ENSG00000049089, ENSG00000187955, ENSG00000163346, ENSG00000146197, ENSG00000140092, ENSG00000105707, ENSG00000152952, ENSG00000204580, ENSG00000113140, ENSG00000163131, ENSG0000…	411	427	19277	3.84448	1.20653e-07
GO TERM: CC	GO:0070062~extracellular exosome	GO:0070062	extracellular exosome	96	19.5519	6.47017e-10	ENSG00000155850, ENSG00000106688, ENSG00000111799, ENSG00000175662, ENSG00000197375, ENSG00000149131, ENSG00000112769, ENSG00000135047, ENSG00000111674, ENSG00000204592, ENSG00000117298, ENSG00000140284, ENSG00000118514, ENSG00000108187, ENSG00000100665, ENSG00000143153, ENSG00000145730, ENSG00000099937, ENSG00000072657, ENSG00000132744, ENSG00000047457, ENSG00000132703, ENSG00000130768, ENSG0000…	396	2217	17223	1.8833	9.44645e-08
GO TERM: CC	GO:1903561~extracellular vesicle	GO:1903561	extracellular vesicle	96	19.5519	5.88982e-09	ENSG00000155850, ENSG00000106688, ENSG00000111799, ENSG00000175662, ENSG00000197375, ENSG00000149131, ENSG00000112769, ENSG00000135047, ENSG00000111674, ENSG00000204592, ENSG00000117298, ENSG00000140284, ENSG00000118514, ENSG00000108187, ENSG00000100665, ENSG00000143153, ENSG00000145730, ENSG00000099937, ENSG00000072657, ENSG00000132744, ENSG00000047457, ENSG00000132703, ENSG00000130768, ENSG0000…	396	2313	17223	1.80513	5.9227e-07
GO TERM: CC	GO:0043230~extracellular organelle	GO:0043230	extracellular organelle	96	19.5519	6.08497e-09	ENSG00000155850, ENSG00000106688, ENSG00000111799, ENSG00000175662, ENSG00000197375, ENSG00000149131, ENSG00000112769, ENSG00000135047, ENSG00000111674, ENSG00000204592, ENSG00000117298, ENSG00000140284, ENSG00000118514, ENSG00000108187, ENSG00000100665, ENSG00000143153, ENSG00000145730, ENSG00000099937, ENSG00000072657, ENSG00000132744, ENSG00000047457, ENSG00000132703, ENSG00000130768, ENSG0000…	396	2315	17223	1.80357	5.9227e-07
GO TERM: BP	GO:0007155~cell adhesion	GO:0007155	cell adhesion	69	14.053	8.18711e-09	ENSG00000064042, ENSG00000173083, ENSG00000111799, ENSG00000173482, ENSG00000112769, ENSG00000107738, ENSG00000197410, ENSG00000204592, ENSG00000167080, ENSG00000008256, ENSG00000167123, ENSG00000183098, ENSG00000143153, ENSG00000073008, ENSG00000132669, ENSG00000169231, ENSG00000116117, ENSG00000204580, ENSG00000174469, ENSG00000172638, ENSG00000113361, ENSG00000168743, ENSG00000120129, ENSG0000…	411	1553	19277	2.08389	1.37037e-05
GO TERM: BP	GO:0022610~biological adhesion	GO:0022610	biological adhesion	69	14.053	9.73099e-09	ENSG00000064042, ENSG00000173083, ENSG00000111799, ENSG00000173482, ENSG00000112769, ENSG00000107738, ENSG00000197410, ENSG00000204592, ENSG00000167080, ENSG00000008256, ENSG00000167123, ENSG00000183098, ENSG00000143153, ENSG00000073008, ENSG00000132669, ENSG00000169231, ENSG00000116117, ENSG00000204580, ENSG00000174469, ENSG00000172638, ENSG00000113361, ENSG00000168743, ENSG00000120129, ENSG0000…	411	1560	19277	2.07454	1.37037e-05
GO TERM: CC	GO:0098590~plasma membrane region	GO:0098590	plasma membrane region	58	11.8126	1.29277e-07	ENSG00000181104, ENSG00000155850, ENSG00000106688, ENSG00000156222, ENSG00000197375, ENSG00000135047, ENSG00000111674, ENSG00000170175, ENSG00000166313, ENSG00000143153, ENSG00000143595, ENSG00000168778, ENSG00000132744, ENSG00000104537, ENSG00000167371, ENSG00000075461, ENSG00000105707, ENSG00000116117, ENSG00000152779, ENSG00000174469, ENSG00000112394, ENSG00000122507, ENSG00000108576, ENSG0000…	396	1203	17223	2.09689	1.07854e-05
GO TERM: MF	GO:0005201~extracellular matrix structural constituent	GO:0005201	extracellular matrix structural constituent	18	3.66599	3.39853e-07	ENSG00000111799, ENSG00000106624, ENSG00000112769, ENSG00000169231, ENSG00000138315, ENSG00000140092, ENSG00000132561, ENSG00000115414, ENSG00000113140, ENSG00000172638, ENSG00000168743, ENSG00000142156, ENSG00000188153, ENSG00000166147, ENSG00000049089, ENSG00000142910, ENSG00000163703, ENSG00000187955	381	170	16739	4.65188	0.000350389
GO TERM: CC	GO:0031012~extracellular matrix	GO:0031012	extracellular matrix	26	5.29532	3.69138e-07	ENSG00000173083, ENSG00000111799, ENSG00000106823, ENSG00000112769, ENSG00000134013, ENSG00000115414, ENSG00000145536, ENSG00000157150, ENSG00000049089, ENSG00000187955, ENSG00000166833, ENSG00000140092, ENSG00000132561, ENSG00000112293, ENSG00000113140, ENSG00000172638, ENSG00000168743, ENSG00000142156, ENSG00000158270, ENSG00000188153, ENSG00000166147, ENSG00000144152, ENSG00000091986, ENSG0000…	396	342	17223	3.30644	2.69471e-05
GO TERM: BP	GO:0072359~circulatory system development	GO:0072359	circulatory system development	54	10.998	7.7989e-07	ENSG00000107731, ENSG00000173083, ENSG00000106688, ENSG00000065970, ENSG00000173482, ENSG00000112769, ENSG00000065534, ENSG00000117298, ENSG00000128917, ENSG00000121361, ENSG00000145730, ENSG00000150593, ENSG00000132669, ENSG00000114019, ENSG00000147869, ENSG00000172638, ENSG00000142178, ENSG00000167772, ENSG00000164307, ENSG00000106031, ENSG00000165556, ENSG00000049192, ENSG00000161638, ENSG0000…	411	1232	19277	2.0558	0.000878624
GO TERM: BP	GO:1901565~organonitrogen compound catabolic process	GO:1901565	organonitrogen compound catabolic process	27	5.49898	1.44387e-06	ENSG00000134538, ENSG00000244509, ENSG00000104324, ENSG00000173083, ENSG00000204099, ENSG00000117298, ENSG00000118514, ENSG00000008311, ENSG00000183098, ENSG00000103316, ENSG00000179163, ENSG00000058668, ENSG00000072657, ENSG00000103066, ENSG00000179399, ENSG00000130768, ENSG00000179750, ENSG00000136960, ENSG00000244474, ENSG00000119711, ENSG00000166340, ENSG00000161031, ENSG00000166825, ENSG0000…	411	423	19277	2.99379	0.00133379
GO TERM: BP	GO:0044723~single-organism carbohydrate metabolic process	GO:0044723	single-organism carbohydrate metabolic process	30	6.10998	1.65747e-06	ENSG00000219607, ENSG00000204099, ENSG00000111674, ENSG00000198743, ENSG00000135220, ENSG00000156966, ENSG00000167080, ENSG00000142784, ENSG00000089127, ENSG00000237172, ENSG00000095637, ENSG00000179163, ENSG00000124253, ENSG00000145335, ENSG00000156510, ENSG00000170482, ENSG00000171174, ENSG00000171234, ENSG00000044446, ENSG00000244474, ENSG00000112293, ENSG00000165475, ENSG00000142178, ENSG0000…	411	509	19277	2.7644	0.00133379
GO TERM: BP	GO:0005996~monosaccharide metabolic process	GO:0005996	monosaccharide metabolic process	22	4.48065	1.89736e-06	ENSG00000156510, ENSG00000219607, ENSG00000170482, ENSG00000171174, ENSG00000111674, ENSG00000171234, ENSG00000135220, ENSG00000244474, ENSG00000112293, ENSG00000165475, ENSG00000142784, ENSG00000142178, ENSG00000166741, ENSG00000166147, ENSG00000089127, ENSG00000110090, ENSG00000156096, ENSG00000095637, ENSG00000179163, ENSG00000124253, ENSG00000165953, ENSG00000059804	411	299	19277	3.45103	0.00133598
GO TERM: MF	GO:0005518~collagen binding	GO:0005518	collagen binding	11	2.24033	3.81107e-06	ENSG00000163131, ENSG00000113140, ENSG00000142156, ENSG00000106823, ENSG00000106624, ENSG00000135047, ENSG00000149269, ENSG00000100311, ENSG00000115414, ENSG00000187955, ENSG00000204580	381	70	16739	6.90397	0.00196461
GO TERM: CC	GO:0005788~endoplasmic reticulum lumen	GO:0005788	endoplasmic reticulum lumen	23	4.68432	3.9303e-06	ENSG00000135506, ENSG00000047457, ENSG00000111799, ENSG00000072682, ENSG00000149131, ENSG00000110244, ENSG00000006756, ENSG00000138823, ENSG00000115414, ENSG00000170558, ENSG00000142156, ENSG00000140284, ENSG00000163430, ENSG00000188153, ENSG00000166147, ENSG00000167123, ENSG00000049089, ENSG00000164307, ENSG00000100311, ENSG00000010932, ENSG00000099937, ENSG00000187955, ENSG00000146678	396	315	17223	3.17564	0.000255033
GO TERM: BP	GO:0007166~cell surface receptor signaling pathway	GO:0007166	cell surface receptor signaling pathway	107	21.7923	3.96476e-06	ENSG00000214357, ENSG00000106688, ENSG00000150281, ENSG00000170175, ENSG00000117298, ENSG00000128917, ENSG00000183098, ENSG00000108187, ENSG00000050165, ENSG00000160654, ENSG00000168778, ENSG00000132109, ENSG00000179399, ENSG00000075461, ENSG00000113361, ENSG00000186470, ENSG00000121858, ENSG00000123999, ENSG00000187045, ENSG00000143869, ENSG00000010319, ENSG00000106031, ENSG00000127831, ENSG0000…	411	3293	19277	1.52402	0.00206032
GO TERM: BP	GO:0001944~vasculature development	GO:0001944	vasculature development	40	8.14664	4.02334e-06	ENSG00000161638, ENSG00000107731, ENSG00000173083, ENSG00000106688, ENSG00000065970, ENSG00000112769, ENSG00000173482, ENSG00000134013, ENSG00000065534, ENSG00000115414, ENSG00000074181, ENSG00000118257, ENSG00000184481, ENSG00000006210, ENSG00000138772, ENSG00000128917, ENSG00000127329, ENSG00000058668, ENSG00000124212, ENSG00000150593, ENSG00000132669, ENSG00000114019, ENSG00000136960, ENSG0000…	411	837	19277	2.24147	0.00206032
GO TERM: BP	GO:0072358~cardiovascular system development	GO:0072358	cardiovascular system development	40	8.14664	4.02334e-06	ENSG00000161638, ENSG00000107731, ENSG00000173083, ENSG00000106688, ENSG00000065970, ENSG00000112769, ENSG00000173482, ENSG00000134013, ENSG00000065534, ENSG00000115414, ENSG00000074181, ENSG00000118257, ENSG00000184481, ENSG00000006210, ENSG00000138772, ENSG00000128917, ENSG00000127329, ENSG00000058668, ENSG00000124212, ENSG00000150593, ENSG00000132669, ENSG00000114019, ENSG00000136960, ENSG0000…	411	837	19277	2.24147	0.00206032
GO TERM: CC	GO:0005578~proteinaceous extracellular matrix	GO:0005578	proteinaceous extracellular matrix	14	2.85132	5.98932e-06	ENSG00000106823, ENSG00000111799, ENSG00000112769, ENSG00000134013, ENSG00000115414, ENSG00000113140, ENSG00000172638, ENSG00000168743, ENSG00000188153, ENSG00000166147, ENSG00000091986, ENSG00000187955, ENSG00000074527, ENSG00000166833	396	125	17223	4.87115	0.000349776
GO TERM: BP	GO:0001568~blood vessel development	GO:0001568	blood vessel development	38	7.73931	6.03823e-06	ENSG00000161638, ENSG00000107731, ENSG00000173083, ENSG00000106688, ENSG00000065970, ENSG00000112769, ENSG00000173482, ENSG00000134013, ENSG00000065534, ENSG00000115414, ENSG00000074181, ENSG00000118257, ENSG00000184481, ENSG00000006210, ENSG00000138772, ENSG00000128917, ENSG00000127329, ENSG00000058668, ENSG00000124212, ENSG00000132669, ENSG00000114019, ENSG00000120937, ENSG00000112293, ENSG0000…	411	788	19277	2.2618	0.00283445
GO TERM: BP	GO:0010033~response to organic substance	GO:0010033	response to organic substance	113	23.0143	6.66019e-06	ENSG00000181104, ENSG00000106688, ENSG00000137869, ENSG00000150281, ENSG00000135047, ENSG00000170175, ENSG00000142784, ENSG00000137463, ENSG00000128917, ENSG00000108187, ENSG00000050165, ENSG00000132109, ENSG00000075461, ENSG00000150551, ENSG00000163131, ENSG00000158270, ENSG00000121858, ENSG00000187045, ENSG00000120129, ENSG00000110090, ENSG00000143869, ENSG00000106031, ENSG00000108576, ENSG0000…	411	3572	19277	1.48376	0.00288591
GO TERM: MF	GO:0005509~calcium ion binding	GO:0005509	calcium ion binding	38	7.73931	6.77315e-06	ENSG00000153395, ENSG00000197410, ENSG00000039068, ENSG00000138315, ENSG00000134013, ENSG00000148180, ENSG00000074181, ENSG00000138772, ENSG00000128917, ENSG00000163703, ENSG00000145730, ENSG00000055957, ENSG00000148702, ENSG00000147852, ENSG00000145335, ENSG00000099834, ENSG00000132703, ENSG00000146197, ENSG00000104537, ENSG00000169231, ENSG00000140092, ENSG00000136960, ENSG00000132561, ENSG0000…	381	744	16739	2.24396	0.00232771
GO TERM: BP	GO:0006629~lipid metabolic process	GO:0006629	lipid metabolic process	59	12.0163	7.23014e-06	ENSG00000153395, ENSG00000137869, ENSG00000138115, ENSG00000167080, ENSG00000142784, ENSG00000140284, ENSG00000118514, ENSG00000060642, ENSG00000183098, ENSG00000050165, ENSG00000145730, ENSG00000143036, ENSG00000145335, ENSG00000102230, ENSG00000128242, ENSG00000130768, ENSG00000179399, ENSG00000171234, ENSG00000165475, ENSG00000142178, ENSG00000167772, ENSG00000110090, ENSG00000163898, ENSG0000…	411	1505	19277	1.83871	0.0029091
GO TERM: BP	GO:0070887~cellular response to chemical stimulus	GO:0070887	cellular response to chemical stimulus	110	22.4033	8.17441e-06	ENSG00000106688, ENSG00000137869, ENSG00000106327, ENSG00000150281, ENSG00000135047, ENSG00000142784, ENSG00000170689, ENSG00000137463, ENSG00000128917, ENSG00000108187, ENSG00000050165, ENSG00000132109, ENSG00000104419, ENSG00000150551, ENSG00000163131, ENSG00000158270, ENSG00000187045, ENSG00000120129, ENSG00000110090, ENSG00000143869, ENSG00000106031, ENSG00000108576, ENSG00000127831, ENSG0000…	411	3466	19277	1.48854	0.00306976
GO TERM: BP	GO:0000902~cell morphogenesis	GO:0000902	cell morphogenesis	46	9.36864	8.78095e-06	ENSG00000107731, ENSG00000127084, ENSG00000173482, ENSG00000205220, ENSG00000115414, ENSG00000074181, ENSG00000118257, ENSG00000166313, ENSG00000117298, ENSG00000137261, ENSG00000161642, ENSG00000162415, ENSG00000162614, ENSG00000104880, ENSG00000147852, ENSG00000158856, ENSG00000111249, ENSG00000136960, ENSG00000117228, ENSG00000105707, ENSG00000113100, ENSG00000046889, ENSG00000204580, ENSG0000…	411	1064	19277	2.02775	0.00309144
GO TERM: MF	GO:0005539~glycosaminoglycan binding	GO:0005539	glycosaminoglycan binding	19	3.86965	9.28337e-06	ENSG00000106823, ENSG00000174992, ENSG00000169231, ENSG00000115414, ENSG00000118257, ENSG00000172638, ENSG00000163430, ENSG00000166147, ENSG00000161031, ENSG00000163898, ENSG00000144152, ENSG00000124875, ENSG00000091986, ENSG00000145147, ENSG00000099937, ENSG00000055957, ENSG00000109610, ENSG00000148702, ENSG00000166833	381	239	16739	3.49269	0.00239279
GO TERM: BP	GO:0032989~cellular component morphogenesis	GO:0032989	cellular component morphogenesis	49	9.97963	9.34797e-06	ENSG00000107731, ENSG00000173482, ENSG00000128591, ENSG00000166313, ENSG00000117298, ENSG00000137261, ENSG00000105707, ENSG00000046889, ENSG00000204580, ENSG00000174469, ENSG00000113361, ENSG00000143869, ENSG00000010319, ENSG00000106031, ENSG00000187688, ENSG00000106078, ENSG00000127831, ENSG00000125650, ENSG00000074527, ENSG00000127084, ENSG00000205220, ENSG00000115414, ENSG00000074181, ENSG0000…	411	1168	19277	1.96766	0.00309748
GO TERM: BP	GO:0009605~response to external stimulus	GO:0009605	response to external stimulus	96	19.5519	1.17807e-05	ENSG00000107731, ENSG00000181104, ENSG00000173083, ENSG00000106688, ENSG00000137869, ENSG00000197375, ENSG00000173482, ENSG00000149131, ENSG00000204592, ENSG00000170689, ENSG00000117298, ENSG00000165861, ENSG00000157150, ENSG00000164251, ENSG00000137261, ENSG00000121361, ENSG00000124875, ENSG00000099937, ENSG00000080293, ENSG00000160654, ENSG00000145335, ENSG00000150593, ENSG00000132703, ENSG0000…	411	2932	19277	1.53569	0.00368671
GO TERM: MF	GO:0046943~carboxylic acid transmembrane transporter activity	GO:0046943	carboxylic acid transmembrane transporter activity	15	3.05499	1.86985e-05	ENSG00000134538, ENSG00000155850, ENSG00000106688, ENSG00000130821, ENSG00000174640, ENSG00000170482, ENSG00000099960, ENSG00000107819, ENSG00000152779, ENSG00000139209, ENSG00000112394, ENSG00000123643, ENSG00000104044, ENSG00000146039, ENSG00000148942	381	161	16739	4.09327	0.00385563
GO TERM: MF	GO:0005342~organic acid transmembrane transporter activity	GO:0005342	organic acid transmembrane transporter activity	15	3.05499	2.4648e-05	ENSG00000134538, ENSG00000155850, ENSG00000106688, ENSG00000130821, ENSG00000174640, ENSG00000170482, ENSG00000099960, ENSG00000107819, ENSG00000152779, ENSG00000139209, ENSG00000112394, ENSG00000123643, ENSG00000104044, ENSG00000146039, ENSG00000148942	381	165	16739	3.99403	0.00423536
GO TERM: BP	GO:1905475~regulation of protein localization to membrane	GO:1905475	regulation of protein localization to membrane	16	3.25866	2.47091e-05	ENSG00000179841, ENSG00000158856, ENSG00000106688, ENSG00000179399, ENSG00000104537, ENSG00000198743, ENSG00000117228, ENSG00000150551, ENSG00000148180, ENSG00000170558, ENSG00000174827, ENSG00000183098, ENSG00000149269, ENSG00000058668, ENSG00000095637, ENSG00000127831	411	199	19277	3.77107	0.0073256
GO TERM: CC	GO:0031226~intrinsic component of plasma membrane	GO:0031226	intrinsic component of plasma membrane	68	13.8493	2.6563e-05	ENSG00000181104, ENSG00000155850, ENSG00000106688, ENSG00000156222, ENSG00000106327, ENSG00000173482, ENSG00000198743, ENSG00000170175, ENSG00000139209, ENSG00000135643, ENSG00000170775, ENSG00000183098, ENSG00000164251, ENSG00000121361, ENSG00000143153, ENSG00000143595, ENSG00000072657, ENSG00000160654, ENSG00000188747, ENSG00000128242, ENSG00000179399, ENSG00000167371, ENSG00000075461, ENSG0000…	396	1770	17223	1.6709	0.00141025
GO TERM: BP	GO:0052547~regulation of peptidase activity	GO:0052547	regulation of peptidase activity	26	5.29532	3.18658e-05	ENSG00000129521, ENSG00000181104, ENSG00000106688, ENSG00000149131, ENSG00000107738, ENSG00000115414, ENSG00000148180, ENSG00000137642, ENSG00000150938, ENSG00000078081, ENSG00000157150, ENSG00000100665, ENSG00000099937, ENSG00000055957, ENSG00000123561, ENSG00000145335, ENSG00000181634, ENSG00000137831, ENSG00000166145, ENSG00000055163, ENSG00000121858, ENSG00000165215, ENSG00000127831, ENSG0000…	411	474	19277	2.57272	0.00897501
GO TERM: CC	GO:0005887~integral component of plasma membrane	GO:0005887	integral component of plasma membrane	65	13.2383	3.83296e-05	ENSG00000181104, ENSG00000155850, ENSG00000106688, ENSG00000156222, ENSG00000106327, ENSG00000173482, ENSG00000198743, ENSG00000170175, ENSG00000139209, ENSG00000135643, ENSG00000170775, ENSG00000164251, ENSG00000121361, ENSG00000143153, ENSG00000143595, ENSG00000072657, ENSG00000160654, ENSG00000188747, ENSG00000128242, ENSG00000167371, ENSG00000075461, ENSG00000105707, ENSG00000152779, ENSG0000…	396	1687	17223	1.67576	0.00186537
GO TERM: MF	GO:0008201~heparin binding	GO:0008201	heparin binding	15	3.05499	3.91331e-05	ENSG00000106823, ENSG00000169231, ENSG00000115414, ENSG00000118257, ENSG00000172638, ENSG00000163430, ENSG00000166147, ENSG00000163898, ENSG00000144152, ENSG00000124875, ENSG00000091986, ENSG00000145147, ENSG00000099937, ENSG00000109610, ENSG00000166833	381	172	16739	3.83149	0.00557625
GO TERM: MF	GO:0022804~active transmembrane transporter activity	GO:0022804	active transmembrane transporter activity	23	4.68432	4.61906e-05	ENSG00000134538, ENSG00000154265, ENSG00000155850, ENSG00000106688, ENSG00000156222, ENSG00000130821, ENSG00000174640, ENSG00000197375, ENSG00000170482, ENSG00000198743, ENSG00000152779, ENSG00000139209, ENSG00000158865, ENSG00000231925, ENSG00000112394, ENSG00000079112, ENSG00000143153, ENSG00000121361, ENSG00000123643, ENSG00000058668, ENSG00000108576, ENSG00000146039, ENSG00000148942	381	373	16739	2.70909	0.00557625
GO TERM: MF	GO:0015291~secondary active transmembrane transporter activity	GO:0015291	secondary active transmembrane transporter activity	18	3.66599	4.86772e-05	ENSG00000134538, ENSG00000155850, ENSG00000106688, ENSG00000156222, ENSG00000130821, ENSG00000174640, ENSG00000197375, ENSG00000170482, ENSG00000198743, ENSG00000152779, ENSG00000139209, ENSG00000158865, ENSG00000112394, ENSG00000079112, ENSG00000123643, ENSG00000108576, ENSG00000146039, ENSG00000148942	381	246	16739	3.21471	0.00557625
GO TERM: CC	GO:0044420~extracellular matrix component	GO:0044420	extracellular matrix component	13	2.64766	4.88104e-05	ENSG00000111799, ENSG00000112769, ENSG00000134013, ENSG00000140092, ENSG00000115414, ENSG00000113140, ENSG00000172638, ENSG00000168743, ENSG00000188153, ENSG00000166147, ENSG00000091986, ENSG00000187955, ENSG00000074527	396	131	17223	4.31604	0.00219271
GO TERM: BP	GO:0042445~hormone metabolic process	GO:0042445	hormone metabolic process	17	3.46232	5.65873e-05	ENSG00000104324, ENSG00000137869, ENSG00000135047, ENSG00000171234, ENSG00000105707, ENSG00000138109, ENSG00000196139, ENSG00000115257, ENSG00000138115, ENSG00000177669, ENSG00000117298, ENSG00000112394, ENSG00000118514, ENSG00000050165, ENSG00000103316, ENSG00000156096, ENSG00000143320	411	239	19277	3.33617	0.0146236
GO TERM: BP	GO:0055085~transmembrane transport	GO:0055085	transmembrane transport	58	11.8126	6.26255e-05	ENSG00000181104, ENSG00000155850, ENSG00000173083, ENSG00000106688, ENSG00000156222, ENSG00000197375, ENSG00000198743, ENSG00000170175, ENSG00000107819, ENSG00000139209, ENSG00000171227, ENSG00000135643, ENSG00000175938, ENSG00000136052, ENSG00000121361, ENSG00000143153, ENSG00000143595, ENSG00000143036, ENSG00000145335, ENSG00000157703, ENSG00000075461, ENSG00000105707, ENSG00000163131, ENSG0000…	411	1585	19277	1.71631	0.0146236
GO TERM: BP	GO:0046942~carboxylic acid transport	GO:0046942	carboxylic acid transport	22	4.48065	6.34153e-05	ENSG00000134538, ENSG00000155850, ENSG00000106688, ENSG00000197142, ENSG00000130821, ENSG00000174640, ENSG00000170482, ENSG00000099960, ENSG00000107819, ENSG00000152779, ENSG00000139209, ENSG00000140284, ENSG00000112394, ENSG00000110090, ENSG00000147003, ENSG00000147872, ENSG00000123643, ENSG00000143320, ENSG00000104044, ENSG00000146039, ENSG00000148942, ENSG00000145335	411	377	19277	2.73703	0.0146236
GO TERM: CC	GO:0016324~apical plasma membrane	GO:0016324	apical plasma membrane	23	4.68432	6.38028e-05	ENSG00000099834, ENSG00000155850, ENSG00000106688, ENSG00000132744, ENSG00000197375, ENSG00000170482, ENSG00000104537, ENSG00000135047, ENSG00000007306, ENSG00000116117, ENSG00000105707, ENSG00000115414, ENSG00000173702, ENSG00000170558, ENSG00000167434, ENSG00000174827, ENSG00000080031, ENSG00000118507, ENSG00000143153, ENSG00000143595, ENSG00000104880, ENSG00000146039, ENSG00000148942	396	377	17223	2.65338	0.00266149
GO TERM: BP	GO:0052548~regulation of endopeptidase activity	GO:0052548	regulation of endopeptidase activity	24	4.88798	6.60754e-05	ENSG00000181104, ENSG00000129521, ENSG00000106688, ENSG00000149131, ENSG00000107738, ENSG00000137831, ENSG00000148180, ENSG00000137642, ENSG00000150938, ENSG00000166145, ENSG00000055163, ENSG00000078081, ENSG00000157150, ENSG00000121858, ENSG00000100665, ENSG00000099937, ENSG00000055957, ENSG00000127831, ENSG00000123561, ENSG00000186910, ENSG00000181634, ENSG00000124102, ENSG00000165953, ENSG0000…	411	436	19277	2.5818	0.0146236
GO TERM: BP	GO:0048858~cell projection morphogenesis	GO:0048858	cell projection morphogenesis	32	6.51731	6.62335e-05	ENSG00000107731, ENSG00000173482, ENSG00000115414, ENSG00000074181, ENSG00000118257, ENSG00000166313, ENSG00000117298, ENSG00000137261, ENSG00000162415, ENSG00000162614, ENSG00000147852, ENSG00000111249, ENSG00000136960, ENSG00000046889, ENSG00000204580, ENSG00000132003, ENSG00000174469, ENSG00000082684, ENSG00000136040, ENSG00000055163, ENSG00000143869, ENSG00000010319, ENSG00000149269, ENSG0000…	411	683	19277	2.19749	0.0146236
GO TERM: BP	GO:0015849~organic acid transport	GO:0015849	organic acid transport	22	4.48065	6.74974e-05	ENSG00000134538, ENSG00000155850, ENSG00000106688, ENSG00000197142, ENSG00000130821, ENSG00000174640, ENSG00000170482, ENSG00000099960, ENSG00000107819, ENSG00000152779, ENSG00000139209, ENSG00000140284, ENSG00000112394, ENSG00000110090, ENSG00000147003, ENSG00000147872, ENSG00000123643, ENSG00000143320, ENSG00000104044, ENSG00000146039, ENSG00000148942, ENSG00000145335	411	379	19277	2.72258	0.0146236
GO TERM: BP	GO:0043171~peptide catabolic process	GO:0043171	peptide catabolic process	7	1.42566	7.24575e-05	ENSG00000117298, ENSG00000104324, ENSG00000166340, ENSG00000166825, ENSG00000128965, ENSG00000164307, ENSG00000072657	411	34	19277	9.65643	0.0151168
GO TERM: BP	GO:0015711~organic anion transport	GO:0015711	organic anion transport	27	5.49898	8.40247e-05	ENSG00000134538, ENSG00000155850, ENSG00000106688, ENSG00000173262, ENSG00000110244, ENSG00000099960, ENSG00000107819, ENSG00000139209, ENSG00000140284, ENSG00000147872, ENSG00000123643, ENSG00000104044, ENSG00000148942, ENSG00000145335, ENSG00000197142, ENSG00000130821, ENSG00000174640, ENSG00000170482, ENSG00000138823, ENSG00000152779, ENSG00000167434, ENSG00000112394, ENSG00000110090, ENSG0000…	411	534	19277	2.37148	0.016904
GO TERM: BP	GO:0040012~regulation of locomotion	GO:0040012	regulation of locomotion	46	9.36864	8.96095e-05	ENSG00000105971, ENSG00000161638, ENSG00000181104, ENSG00000064042, ENSG00000174992, ENSG00000137869, ENSG00000112769, ENSG00000173482, ENSG00000107738, ENSG00000039068, ENSG00000181284, ENSG00000065534, ENSG00000115414, ENSG00000137642, ENSG00000118257, ENSG00000184481, ENSG00000006210, ENSG00000138772, ENSG00000128917, ENSG00000164251, ENSG00000108187, ENSG00000162415, ENSG00000162614, ENSG0000…	411	1171	19277	1.84246	0.0170413
GO TERM: BP	GO:0008015~blood circulation	GO:0008015	blood circulation	28	5.70265	9.07581e-05	ENSG00000181104, ENSG00000106688, ENSG00000149131, ENSG00000119782, ENSG00000148180, ENSG00000135643, ENSG00000145536, ENSG00000117298, ENSG00000128917, ENSG00000205502, ENSG00000164251, ENSG00000143153, ENSG00000121361, ENSG00000058668, ENSG00000109610, ENSG00000072657, ENSG00000166833, ENSG00000104881, ENSG00000173991, ENSG00000130427, ENSG00000075461, ENSG00000120937, ENSG00000120049, ENSG0000…	411	568	19277	2.3121	0.0170413
GO TERM: BP	GO:0006811~ion transport	GO:0006811	ion transport	62	12.6273	9.74906e-05	ENSG00000181104, ENSG00000155850, ENSG00000106688, ENSG00000197375, ENSG00000106327, ENSG00000198743, ENSG00000170175, ENSG00000065534, ENSG00000107819, ENSG00000139209, ENSG00000171227, ENSG00000135643, ENSG00000175938, ENSG00000140284, ENSG00000136052, ENSG00000147872, ENSG00000121361, ENSG00000143153, ENSG00000143036, ENSG00000145335, ENSG00000047457, ENSG00000075461, ENSG00000105707, ENSG0000…	411	1761	19277	1.65132	0.017715
GO TERM: BP	GO:0032990~cell part morphogenesis	GO:0032990	cell part morphogenesis	32	6.51731	0.000105557	ENSG00000107731, ENSG00000173482, ENSG00000115414, ENSG00000074181, ENSG00000118257, ENSG00000166313, ENSG00000117298, ENSG00000137261, ENSG00000162415, ENSG00000162614, ENSG00000147852, ENSG00000111249, ENSG00000136960, ENSG00000046889, ENSG00000204580, ENSG00000132003, ENSG00000174469, ENSG00000082684, ENSG00000136040, ENSG00000055163, ENSG00000143869, ENSG00000010319, ENSG00000149269, ENSG0000…	411	701	19277	2.14106	0.0179119
GO TERM: BP	GO:0098742~cell-cell adhesion via plasma-membrane adhesion molecules	GO:0098742	cell-cell adhesion via plasma-membrane adhesion molecules	18	3.66599	0.000107147	ENSG00000099834, ENSG00000161638, ENSG00000073008, ENSG00000173482, ENSG00000039068, ENSG00000197410, ENSG00000113100, ENSG00000170558, ENSG00000113361, ENSG00000006210, ENSG00000159261, ENSG00000079112, ENSG00000160593, ENSG00000183098, ENSG00000166341, ENSG00000162614, ENSG00000185008, ENSG00000165215	411	279	19277	3.02598	0.0179119
GO TERM: BP	GO:0048514~blood vessel morphogenesis	GO:0048514	blood vessel morphogenesis	32	6.51731	0.000108114	ENSG00000161638, ENSG00000107731, ENSG00000173083, ENSG00000106688, ENSG00000065970, ENSG00000173482, ENSG00000134013, ENSG00000065534, ENSG00000115414, ENSG00000074181, ENSG00000118257, ENSG00000184481, ENSG00000006210, ENSG00000138772, ENSG00000128917, ENSG00000127329, ENSG00000058668, ENSG00000124212, ENSG00000132669, ENSG00000114019, ENSG00000120937, ENSG00000112293, ENSG00000113140, ENSG0000…	411	702	19277	2.13801	0.0179119
GO TERM: MF	GO:0015293~symporter activity	GO:0015293	symporter activity	13	2.64766	0.000110666	ENSG00000106688, ENSG00000156222, ENSG00000130821, ENSG00000197375, ENSG00000170482, ENSG00000198743, ENSG00000152779, ENSG00000139209, ENSG00000158865, ENSG00000123643, ENSG00000108576, ENSG00000146039, ENSG00000148942	381	144	16739	3.9663	0.0114097
GO TERM: BP	GO:0003013~circulatory system process	GO:0003013	circulatory system process	28	5.70265	0.000121723	ENSG00000181104, ENSG00000106688, ENSG00000149131, ENSG00000119782, ENSG00000148180, ENSG00000135643, ENSG00000145536, ENSG00000117298, ENSG00000128917, ENSG00000205502, ENSG00000164251, ENSG00000143153, ENSG00000121361, ENSG00000058668, ENSG00000109610, ENSG00000072657, ENSG00000166833, ENSG00000104881, ENSG00000173991, ENSG00000130427, ENSG00000075461, ENSG00000120937, ENSG00000120049, ENSG0000…	411	578	19277	2.2721	0.0183509
GO TERM: BP	GO:0090092~regulation of transmembrane receptor protein serine/threonine kinase signaling pathway	GO:0090092	regulation of transmembrane receptor protein serine/threonine kinase signaling pathway	18	3.66599	0.000121976	ENSG00000105971, ENSG00000146197, ENSG00000116985, ENSG00000139269, ENSG00000137642, ENSG00000150938, ENSG00000147869, ENSG00000168743, ENSG00000163430, ENSG00000166147, ENSG00000123999, ENSG00000187045, ENSG00000143869, ENSG00000137261, ENSG00000108187, ENSG00000050165, ENSG00000106031, ENSG00000164488	411	282	19277	2.99379	0.0183509
GO TERM: BP	GO:0061564~axon development	GO:0061564	axon development	27	5.49898	0.0001238	ENSG00000107731, ENSG00000173482, ENSG00000110244, ENSG00000115414, ENSG00000119782, ENSG00000074181, ENSG00000118257, ENSG00000166313, ENSG00000117298, ENSG00000137261, ENSG00000162415, ENSG00000162614, ENSG00000147852, ENSG00000204580, ENSG00000132003, ENSG00000082684, ENSG00000136040, ENSG00000143869, ENSG00000010319, ENSG00000149269, ENSG00000187688, ENSG00000145147, ENSG00000106078, ENSG0000…	411	547	19277	2.31512	0.0183509
GO TERM: BP	GO:0050790~regulation of catalytic activity	GO:0050790	regulation of catalytic activity	83	16.9043	0.000126737	ENSG00000129521, ENSG00000181104, ENSG00000219607, ENSG00000106688, ENSG00000158806, ENSG00000149131, ENSG00000107738, ENSG00000198743, ENSG00000095383, ENSG00000142784, ENSG00000008256, ENSG00000165861, ENSG00000157150, ENSG00000078081, ENSG00000164251, ENSG00000100665, ENSG00000143153, ENSG00000099937, ENSG00000188747, ENSG00000145335, ENSG00000150593, ENSG00000132703, ENSG00000132669, ENSG0000…	411	2593	19277	1.50132	0.0183509
GO TERM: BP	GO:0045833~negative regulation of lipid metabolic process	GO:0045833	negative regulation of lipid metabolic process	11	2.24033	0.000129497	ENSG00000112293, ENSG00000142784, ENSG00000142178, ENSG00000153395, ENSG00000050165, ENSG00000100311, ENSG00000196139, ENSG00000089163, ENSG00000137642, ENSG00000244474, ENSG00000165953	411	111	19277	4.64801	0.0183509
GO TERM: BP	GO:0051336~regulation of hydrolase activity	GO:0051336	regulation of hydrolase activity	48	9.77597	0.000130723	ENSG00000105971, ENSG00000129521, ENSG00000181104, ENSG00000106688, ENSG00000127084, ENSG00000149131, ENSG00000107738, ENSG00000110244, ENSG00000115414, ENSG00000119782, ENSG00000148180, ENSG00000111331, ENSG00000137642, ENSG00000095383, ENSG00000150938, ENSG00000006210, ENSG00000165861, ENSG00000078081, ENSG00000157150, ENSG00000089127, ENSG00000164251, ENSG00000100665, ENSG00000143153, ENSG0000…	411	1262	19277	1.78394	0.0183509
GO TERM: BP	GO:0044255~cellular lipid metabolic process	GO:0044255	cellular lipid metabolic process	45	9.16497	0.000133567	ENSG00000153395, ENSG00000204099, ENSG00000110244, ENSG00000138115, ENSG00000137642, ENSG00000167080, ENSG00000006534, ENSG00000177669, ENSG00000142784, ENSG00000084710, ENSG00000140284, ENSG00000118514, ENSG00000060642, ENSG00000183098, ENSG00000163624, ENSG00000179163, ENSG00000145730, ENSG00000124253, ENSG00000089163, ENSG00000143036, ENSG00000145335, ENSG00000124212, ENSG00000103066, ENSG0000…	411	1156	19277	1.8258	0.0183509
GO TERM: BP	GO:0005975~carbohydrate metabolic process	GO:0005975	carbohydrate metabolic process	31	6.31365	0.000139673	ENSG00000219607, ENSG00000204099, ENSG00000111674, ENSG00000198743, ENSG00000135220, ENSG00000156966, ENSG00000167080, ENSG00000142784, ENSG00000089127, ENSG00000237172, ENSG00000095637, ENSG00000179163, ENSG00000124253, ENSG00000145335, ENSG00000156510, ENSG00000170482, ENSG00000171174, ENSG00000115525, ENSG00000171234, ENSG00000044446, ENSG00000244474, ENSG00000112293, ENSG00000165475, ENSG0000…	411	679	19277	2.14136	0.0187327
GO TERM: BP	GO:0009719~response to endogenous stimulus	GO:0009719	response to endogenous stimulus	64	13.0346	0.000144642	ENSG00000106688, ENSG00000135047, ENSG00000170175, ENSG00000117139, ENSG00000142784, ENSG00000137463, ENSG00000157150, ENSG00000128917, ENSG00000108187, ENSG00000050165, ENSG00000145730, ENSG00000145335, ENSG00000150593, ENSG00000075461, ENSG00000105707, ENSG00000265972, ENSG00000150551, ENSG00000147869, ENSG00000163131, ENSG00000168743, ENSG00000121858, ENSG00000143869, ENSG00000187045, ENSG0000…	411	1863	19277	1.61126	0.0189481
GO TERM: BP	GO:0065009~regulation of molecular function	GO:0065009	regulation of molecular function	100	20.3666	0.000165137	ENSG00000181104, ENSG00000106688, ENSG00000198743, ENSG00000142784, ENSG00000050165, ENSG00000099937, ENSG00000132109, ENSG00000131370, ENSG00000075461, ENSG00000150551, ENSG00000163131, ENSG00000205517, ENSG00000121858, ENSG00000120129, ENSG00000127831, ENSG00000186910, ENSG00000165953, ENSG00000179841, ENSG00000127084, ENSG00000155792, ENSG00000116701, ENSG00000148180, ENSG00000146966, ENSG0000…	411	3301	19277	1.42086	0.0211413
GO TERM: MF	GO:0015370~solute:sodium symporter activity	GO:0015370	solute:sodium symporter activity	8	1.62933	0.000184367	ENSG00000106688, ENSG00000156222, ENSG00000130821, ENSG00000170482, ENSG00000198743, ENSG00000108576, ENSG00000158865, ENSG00000148942	381	53	16739	6.63161	0.0172802
GO TERM: BP	GO:0040011~locomotion	GO:0040011	locomotion	71	14.4603	0.000205845	ENSG00000107731, ENSG00000181104, ENSG00000064042, ENSG00000137869, ENSG00000173482, ENSG00000112769, ENSG00000107738, ENSG00000065534, ENSG00000170775, ENSG00000170689, ENSG00000117298, ENSG00000128917, ENSG00000183098, ENSG00000164251, ENSG00000137261, ENSG00000108187, ENSG00000143153, ENSG00000124875, ENSG00000079308, ENSG00000099937, ENSG00000132109, ENSG00000132669, ENSG00000179399, ENSG0000…	411	2158	19277	1.54314	0.0257672
GO TERM: CC	GO:0005773~vacuole	GO:0005773	vacuole	38	7.73931	0.000209851	ENSG00000154265, ENSG00000104324, ENSG00000173083, ENSG00000105612, ENSG00000153395, ENSG00000204099, ENSG00000135047, ENSG00000006756, ENSG00000116701, ENSG00000117298, ENSG00000165861, ENSG00000078081, ENSG00000183098, ENSG00000123643, ENSG00000179163, ENSG00000147852, ENSG00000104044, ENSG00000145335, ENSG00000185339, ENSG00000103066, ENSG00000158516, ENSG00000047457, ENSG00000256043, ENSG0000…	396	866	17223	1.90844	0.00817018
GO TERM: BP	GO:0034330~cell junction organization	GO:0034330	cell junction organization	19	3.86965	0.000213963	ENSG00000158856, ENSG00000181104, ENSG00000161638, ENSG00000073008, ENSG00000064042, ENSG00000039068, ENSG00000128591, ENSG00000115414, ENSG00000113100, ENSG00000174469, ENSG00000170558, ENSG00000113361, ENSG00000159261, ENSG00000079112, ENSG00000164251, ENSG00000166341, ENSG00000095637, ENSG00000079308, ENSG00000165215	411	324	19277	2.75047	0.0262011
GO TERM: BP	GO:0048812~neuron projection morphogenesis	GO:0048812	neuron projection morphogenesis	30	6.10998	0.000243783	ENSG00000107731, ENSG00000173482, ENSG00000115414, ENSG00000074181, ENSG00000118257, ENSG00000166313, ENSG00000117298, ENSG00000137261, ENSG00000162415, ENSG00000162614, ENSG00000147852, ENSG00000111249, ENSG00000046889, ENSG00000204580, ENSG00000132003, ENSG00000174469, ENSG00000082684, ENSG00000136040, ENSG00000055163, ENSG00000143869, ENSG00000010319, ENSG00000149269, ENSG00000187688, ENSG0000…	411	668	19277	2.10641	0.0292177
GO TERM: BP	GO:0001667~ameboidal-type cell migration	GO:0001667	ameboidal-type cell migration	24	4.88798	0.000270859	ENSG00000158856, ENSG00000132669, ENSG00000173482, ENSG00000136960, ENSG00000134013, ENSG00000114019, ENSG00000115414, ENSG00000118257, ENSG00000082684, ENSG00000147869, ENSG00000112293, ENSG00000170558, ENSG00000113140, ENSG00000163430, ENSG00000138772, ENSG00000128917, ENSG00000108187, ENSG00000010319, ENSG00000149269, ENSG00000100311, ENSG00000058668, ENSG00000145147, ENSG00000079308, ENSG0000…	411	480	19277	2.34513	0.0317864
GO TERM: CC	GO:0044432~endoplasmic reticulum part	GO:0044432	endoplasmic reticulum part	55	11.2016	0.000272444	ENSG00000111799, ENSG00000153395, ENSG00000137869, ENSG00000149131, ENSG00000006756, ENSG00000138115, ENSG00000204592, ENSG00000170775, ENSG00000140284, ENSG00000060642, ENSG00000165861, ENSG00000167123, ENSG00000049089, ENSG00000099937, ENSG00000102230, ENSG00000047457, ENSG00000171234, ENSG00000105707, ENSG00000086619, ENSG00000174938, ENSG00000156096, ENSG00000164307, ENSG00000135506, ENSG0000…	396	1452	17223	1.64744	0.00994421
GO TERM: CC	GO:0045177~apical part of cell	GO:0045177	apical part of cell	24	4.88798	0.000297226	ENSG00000099834, ENSG00000155850, ENSG00000106688, ENSG00000132744, ENSG00000197375, ENSG00000170482, ENSG00000104537, ENSG00000135047, ENSG00000007306, ENSG00000116117, ENSG00000105707, ENSG00000115414, ENSG00000173702, ENSG00000170558, ENSG00000167434, ENSG00000174827, ENSG00000080031, ENSG00000166341, ENSG00000118507, ENSG00000143153, ENSG00000143595, ENSG00000104880, ENSG00000146039, ENSG0000…	396	449	17223	2.32476	0.0102106
GO TERM: BP	GO:0006508~proteolysis	GO:0006508	proteolysis	67	13.6456	0.000303211	ENSG00000129521, ENSG00000181104, ENSG00000127585, ENSG00000156587, ENSG00000106688, ENSG00000106327, ENSG00000149131, ENSG00000107738, ENSG00000135047, ENSG00000145536, ENSG00000117298, ENSG00000157150, ENSG00000078081, ENSG00000100665, ENSG00000099937, ENSG00000072657, ENSG00000145335, ENSG00000158516, ENSG00000132109, ENSG00000137831, ENSG00000105707, ENSG00000163131, ENSG00000139178, ENSG0000…	411	2030	19277	1.54802	0.0348569
GO TERM: BP	GO:0048468~cell development	GO:0048468	cell development	74	15.0713	0.000311973	ENSG00000107731, ENSG00000173083, ENSG00000158806, ENSG00000173482, ENSG00000128591, ENSG00000150281, ENSG00000170175, ENSG00000189195, ENSG00000170775, ENSG00000166313, ENSG00000117298, ENSG00000128917, ENSG00000164251, ENSG00000137261, ENSG00000150593, ENSG00000153902, ENSG00000104419, ENSG00000046889, ENSG00000204580, ENSG00000174469, ENSG00000172638, ENSG00000186790, ENSG00000175707, ENSG0000…	411	2306	19277	1.50512	0.0351468
GO TERM: BP	GO:0006820~anion transport	GO:0006820	anion transport	30	6.10998	0.000352864	ENSG00000134538, ENSG00000155850, ENSG00000106688, ENSG00000173262, ENSG00000109738, ENSG00000110244, ENSG00000099960, ENSG00000151834, ENSG00000107819, ENSG00000139209, ENSG00000140284, ENSG00000147872, ENSG00000123643, ENSG00000104044, ENSG00000148942, ENSG00000145335, ENSG00000197142, ENSG00000130821, ENSG00000174640, ENSG00000170482, ENSG00000138823, ENSG00000152779, ENSG00000167434, ENSG0000…	411	684	19277	2.05713	0.0389742
GO TERM: MF	GO:0008514~organic anion transmembrane transporter activity	GO:0008514	organic anion transmembrane transporter activity	15	3.05499	0.000355831	ENSG00000134538, ENSG00000155850, ENSG00000106688, ENSG00000130821, ENSG00000174640, ENSG00000170482, ENSG00000099960, ENSG00000107819, ENSG00000152779, ENSG00000139209, ENSG00000112394, ENSG00000123643, ENSG00000104044, ENSG00000146039, ENSG00000148942	381	212	16739	3.10856	0.0305718
GO TERM: BP	GO:0000904~cell morphogenesis involved in differentiation	GO:0000904	cell morphogenesis involved in differentiation	33	6.72098	0.00036036	ENSG00000107731, ENSG00000173482, ENSG00000115414, ENSG00000074181, ENSG00000118257, ENSG00000166313, ENSG00000117298, ENSG00000137261, ENSG00000161642, ENSG00000162415, ENSG00000162614, ENSG00000147852, ENSG00000158856, ENSG00000111249, ENSG00000117228, ENSG00000046889, ENSG00000132003, ENSG00000082684, ENSG00000170558, ENSG00000136040, ENSG00000143869, ENSG00000010319, ENSG00000149269, ENSG0000…	411	786	19277	1.9692	0.0390367
GO TERM: BP	GO:0051828~entry into other organism involved in symbiotic interaction	GO:0051828	entry into other organism involved in symbiotic interaction	12	2.44399	0.000373225	ENSG00000105971, ENSG00000161638, ENSG00000073008, ENSG00000132109, ENSG00000132703, ENSG00000174992, ENSG00000039068, ENSG00000166825, ENSG00000135047, ENSG00000185201, ENSG00000113249, ENSG00000148180	411	150	19277	3.75221	0.0396675
GO TERM: CC	GO:0005783~endoplasmic reticulum	GO:0005783	endoplasmic reticulum	71	14.4603	0.000380949	ENSG00000106688, ENSG00000111799, ENSG00000153395, ENSG00000137869, ENSG00000149131, ENSG00000006756, ENSG00000138115, ENSG00000204592, ENSG00000170775, ENSG00000166313, ENSG00000140284, ENSG00000060642, ENSG00000165861, ENSG00000167123, ENSG00000147872, ENSG00000049089, ENSG00000099937, ENSG00000145335, ENSG00000102230, ENSG00000047457, ENSG00000171234, ENSG00000105707, ENSG00000086619, ENSG0000…	396	2047	17223	1.50853	0.0116068
GO TERM: BP	GO:0097164~ammonium ion metabolic process	GO:0097164	ammonium ion metabolic process	15	3.05499	0.000395812	ENSG00000103066, ENSG00000102230, ENSG00000106688, ENSG00000153395, ENSG00000130768, ENSG00000136960, ENSG00000110244, ENSG00000196139, ENSG00000170775, ENSG00000112293, ENSG00000110090, ENSG00000163624, ENSG00000182156, ENSG00000143036, ENSG00000145335	411	228	19277	3.0857	0.0404664
GO TERM: CC	GO:0005764~lysosome	GO:0005764	lysosome	34	6.92464	0.000397832	ENSG00000154265, ENSG00000104324, ENSG00000173083, ENSG00000105612, ENSG00000153395, ENSG00000204099, ENSG00000135047, ENSG00000006756, ENSG00000116701, ENSG00000117298, ENSG00000078081, ENSG00000183098, ENSG00000123643, ENSG00000179163, ENSG00000147852, ENSG00000104044, ENSG00000145335, ENSG00000185339, ENSG00000103066, ENSG00000047457, ENSG00000256043, ENSG00000179399, ENSG00000077585, ENSG0000…	396	766	17223	1.93047	0.0116068
GO TERM: CC	GO:0000323~lytic vacuole	GO:0000323	lytic vacuole	34	6.92464	0.000397832	ENSG00000154265, ENSG00000104324, ENSG00000173083, ENSG00000105612, ENSG00000153395, ENSG00000204099, ENSG00000135047, ENSG00000006756, ENSG00000116701, ENSG00000117298, ENSG00000078081, ENSG00000183098, ENSG00000123643, ENSG00000179163, ENSG00000147852, ENSG00000104044, ENSG00000145335, ENSG00000185339, ENSG00000103066, ENSG00000047457, ENSG00000256043, ENSG00000179399, ENSG00000077585, ENSG0000…	396	766	17223	1.93047	0.0116068
GO TERM: BP	GO:0045861~negative regulation of proteolysis	GO:0045861	negative regulation of proteolysis	20	4.07332	0.000402201	ENSG00000132109, ENSG00000149131, ENSG00000137642, ENSG00000150938, ENSG00000166145, ENSG00000078081, ENSG00000157150, ENSG00000123843, ENSG00000100665, ENSG00000128965, ENSG00000099937, ENSG00000055957, ENSG00000127831, ENSG00000123561, ENSG00000186910, ENSG00000089163, ENSG00000168955, ENSG00000124102, ENSG00000165953, ENSG00000145335	411	371	19277	2.52845	0.0404664
GO TERM: BP	GO:0048584~positive regulation of response to stimulus	GO:0048584	positive regulation of response to stimulus	83	16.9043	0.000402294	ENSG00000107731, ENSG00000181104, ENSG00000173083, ENSG00000149131, ENSG00000150281, ENSG00000135047, ENSG00000065534, ENSG00000204592, ENSG00000170775, ENSG00000166313, ENSG00000128917, ENSG00000164251, ENSG00000137261, ENSG00000080293, ENSG00000160654, ENSG00000145335, ENSG00000073008, ENSG00000150593, ENSG00000132703, ENSG00000132109, ENSG00000130768, ENSG00000179399, ENSG00000075461, ENSG0000…	411	2688	19277	1.44826	0.0404664
GO TERM: MF	GO:0004857~enzyme inhibitor activity	GO:0004857	enzyme inhibitor activity	22	4.48065	0.000410846	ENSG00000149131, ENSG00000131370, ENSG00000265972, ENSG00000196975, ENSG00000150938, ENSG00000142784, ENSG00000166145, ENSG00000138496, ENSG00000138772, ENSG00000157150, ENSG00000167772, ENSG00000100665, ENSG00000058668, ENSG00000145147, ENSG00000099937, ENSG00000055957, ENSG00000127831, ENSG00000123561, ENSG00000186910, ENSG00000124102, ENSG00000165953, ENSG00000145335	381	406	16739	2.38068	0.0308886
GO TERM: BP	GO:0031175~neuron projection development	GO:0031175	neuron projection development	39	7.94297	0.000416915	ENSG00000107731, ENSG00000173482, ENSG00000039068, ENSG00000204099, ENSG00000110244, ENSG00000115414, ENSG00000119782, ENSG00000189195, ENSG00000074181, ENSG00000170775, ENSG00000118257, ENSG00000166313, ENSG00000117298, ENSG00000006210, ENSG00000137261, ENSG00000162415, ENSG00000162614, ENSG00000147852, ENSG00000111249, ENSG00000130427, ENSG00000046889, ENSG00000204580, ENSG00000132003, ENSG0000…	411	1002	19277	1.82555	0.041101
GO TERM: CC	GO:0043202~lysosomal lumen	GO:0043202	lysosomal lumen	10	2.03666	0.000417368	ENSG00000163131, ENSG00000173083, ENSG00000166340, ENSG00000183098, ENSG00000179399, ENSG00000135047, ENSG00000204099, ENSG00000145321, ENSG00000179163, ENSG00000185339	396	98	17223	4.438	0.0116068
GO TERM: MF	GO:0038024~cargo receptor activity	GO:0038024	cargo receptor activity	9	1.83299	0.000419438	ENSG00000108679, ENSG00000138131, ENSG00000158270, ENSG00000106327, ENSG00000136960, ENSG00000134013, ENSG00000105707, ENSG00000147852, ENSG00000137642	381	79	16739	5.00518	0.0308886
GO TERM: BP	GO:0007409~axonogenesis	GO:0007409	axonogenesis	24	4.88798	0.000423195	ENSG00000107731, ENSG00000173482, ENSG00000115414, ENSG00000074181, ENSG00000132003, ENSG00000118257, ENSG00000082684, ENSG00000136040, ENSG00000117298, ENSG00000166313, ENSG00000143869, ENSG00000137261, ENSG00000010319, ENSG00000149269, ENSG00000162415, ENSG00000187688, ENSG00000162614, ENSG00000143320, ENSG00000145147, ENSG00000106078, ENSG00000185008, ENSG00000125650, ENSG00000147852, ENSG0000…	411	496	19277	2.26948	0.041101
GO TERM: BP	GO:0006575~cellular modified amino acid metabolic process	GO:0006575	cellular modified amino acid metabolic process	14	2.85132	0.00044674	ENSG00000103066, ENSG00000129521, ENSG00000104324, ENSG00000106688, ENSG00000130821, ENSG00000072682, ENSG00000105707, ENSG00000152952, ENSG00000086205, ENSG00000112394, ENSG00000166165, ENSG00000103316, ENSG00000128965, ENSG00000168528	411	204	19277	3.21881	0.0426523
GO TERM: BP	GO:0034341~response to interferon-gamma	GO:0034341	response to interferon-gamma	14	2.85132	0.000466257	ENSG00000173193, ENSG00000132109, ENSG00000117228, ENSG00000117226, ENSG00000148180, ENSG00000111331, ENSG00000204592, ENSG00000006210, ENSG00000138496, ENSG00000206503, ENSG00000089127, ENSG00000162645, ENSG00000185201, ENSG00000145335	411	205	19277	3.20311	0.0432573
GO TERM: BP	GO:0010817~regulation of hormone levels	GO:0010817	regulation of hormone levels	26	5.29532	0.000468435	ENSG00000134538, ENSG00000104324, ENSG00000137869, ENSG00000106327, ENSG00000135047, ENSG00000119782, ENSG00000115257, ENSG00000138115, ENSG00000177669, ENSG00000117298, ENSG00000118514, ENSG00000103316, ENSG00000050165, ENSG00000123561, ENSG00000089163, ENSG00000171234, ENSG00000138109, ENSG00000105707, ENSG00000196139, ENSG00000112293, ENSG00000112394, ENSG00000110090, ENSG00000123999, ENSG0000…	411	564	19277	2.16218	0.0432573
GO TERM: CC	GO:0009986~cell surface	GO:0009986	cell surface	42	8.55397	0.00047595	ENSG00000161638, ENSG00000181104, ENSG00000106688, ENSG00000106327, ENSG00000181284, ENSG00000138315, ENSG00000111674, ENSG00000110244, ENSG00000065534, ENSG00000074181, ENSG00000204592, ENSG00000137642, ENSG00000170775, ENSG00000117298, ENSG00000006210, ENSG00000078081, ENSG00000183098, ENSG00000145730, ENSG00000079308, ENSG00000160654, ENSG00000073008, ENSG00000146197, ENSG00000130427, ENSG0000…	396	1037	17223	1.76151	0.0123069
GO TERM: CC	GO:0005604~basement membrane	GO:0005604	basement membrane	10	2.03666	0.000484691	ENSG00000113140, ENSG00000172638, ENSG00000168743, ENSG00000188153, ENSG00000166147, ENSG00000112769, ENSG00000134013, ENSG00000091986, ENSG00000115414, ENSG00000074527	396	100	17223	4.34924	0.0123069
GO TERM: BP	GO:0060333~interferon-gamma-mediated signaling pathway	GO:0060333	interferon-gamma-mediated signaling pathway	9	1.83299	0.000488209	ENSG00000138496, ENSG00000173193, ENSG00000132109, ENSG00000206503, ENSG00000089127, ENSG00000162645, ENSG00000117228, ENSG00000111331, ENSG00000204592	411	86	19277	4.90842	0.0438334
GO TERM: BP	GO:0008610~lipid biosynthetic process	GO:0008610	lipid biosynthetic process	32	6.51731	0.000493277	ENSG00000153395, ENSG00000137869, ENSG00000110244, ENSG00000138115, ENSG00000006534, ENSG00000142784, ENSG00000140284, ENSG00000118514, ENSG00000060642, ENSG00000050165, ENSG00000163624, ENSG00000095637, ENSG00000124253, ENSG00000089163, ENSG00000143036, ENSG00000124212, ENSG00000103066, ENSG00000102230, ENSG00000128242, ENSG00000197142, ENSG00000115525, ENSG00000138109, ENSG00000136881, ENSG0000…	411	766	19277	1.95938	0.0438334
GO TERM: BP	GO:0010811~positive regulation of cell-substrate adhesion	GO:0010811	positive regulation of cell-substrate adhesion	11	2.24033	0.000498018	ENSG00000158856, ENSG00000172638, ENSG00000168743, ENSG00000161638, ENSG00000006210, ENSG00000106823, ENSG00000169499, ENSG00000132669, ENSG00000100311, ENSG00000091986, ENSG00000115414	411	131	19277	3.93839	0.0438334
GO TERM: MF	GO:0004867~serine-type endopeptidase inhibitor activity	GO:0004867	serine-type endopeptidase inhibitor activity	10	2.03666	0.000558873	ENSG00000150938, ENSG00000166145, ENSG00000149131, ENSG00000100665, ENSG00000055957, ENSG00000099937, ENSG00000123561, ENSG00000186910, ENSG00000124102, ENSG00000165953	381	103	16739	4.26547	0.0360124
GO TERM: MF	GO:0015294~solute:cation symporter activity	GO:0015294	solute:cation symporter activity	10	2.03666	0.000558873	ENSG00000106688, ENSG00000156222, ENSG00000130821, ENSG00000170482, ENSG00000198743, ENSG00000123643, ENSG00000108576, ENSG00000158865, ENSG00000146039, ENSG00000148942	381	103	16739	4.26547	0.0360124
GO TERM: BP	GO:0030199~collagen fibril organization	GO:0030199	collagen fibril organization	10	2.03666	0.000570882	ENSG00000172638, ENSG00000138131, ENSG00000142156, ENSG00000188153, ENSG00000111799, ENSG00000072682, ENSG00000134013, ENSG00000049089, ENSG00000152952, ENSG00000187955	411	110	19277	4.26388	0.0492183
GO TERM: BP	GO:0071310~cellular response to organic substance	GO:0071310	cellular response to organic substance	87	17.7189	0.000576674	ENSG00000106688, ENSG00000150281, ENSG00000135047, ENSG00000117139, ENSG00000204592, ENSG00000142784, ENSG00000137463, ENSG00000128917, ENSG00000164251, ENSG00000108187, ENSG00000050165, ENSG00000124875, ENSG00000145335, ENSG00000150593, ENSG00000132109, ENSG00000152137, ENSG00000147869, ENSG00000163131, ENSG00000168743, ENSG00000160181, ENSG00000158270, ENSG00000143869, ENSG00000187045, ENSG0000…	411	2881	19277	1.41636	0.0492183
GO TERM: BP	GO:0007160~cell-matrix adhesion	GO:0007160	cell-matrix adhesion	15	3.05499	0.000606429	ENSG00000158856, ENSG00000161638, ENSG00000173083, ENSG00000064042, ENSG00000106823, ENSG00000132669, ENSG00000169231, ENSG00000140092, ENSG00000115414, ENSG00000204580, ENSG00000172638, ENSG00000168743, ENSG00000006210, ENSG00000169499, ENSG00000095637	411	238	19277	2.95605	0.0509853
GO TERM: BP	GO:0061138~morphogenesis of a branching epithelium	GO:0061138	morphogenesis of a branching epithelium	13	2.64766	0.000624779	ENSG00000117139, ENSG00000204580, ENSG00000145536, ENSG00000168743, ENSG00000166145, ENSG00000128917, ENSG00000143869, ENSG00000166341, ENSG00000149269, ENSG00000128713, ENSG00000106031, ENSG00000145147, ENSG00000074527	411	185	19277	3.29586	0.0517556
GO TERM: MF	GO:0061135~endopeptidase regulator activity	GO:0061135	endopeptidase regulator activity	14	2.85132	0.000637613	ENSG00000149131, ENSG00000107738, ENSG00000150938, ENSG00000166145, ENSG00000157150, ENSG00000100665, ENSG00000099937, ENSG00000055957, ENSG00000127831, ENSG00000123561, ENSG00000186910, ENSG00000124102, ENSG00000165953, ENSG00000145335	381	199	16739	3.09086	0.0386693
GO TERM: BP	GO:0007178~transmembrane receptor protein serine/threonine kinase signaling pathway	GO:0007178	transmembrane receptor protein serine/threonine kinase signaling pathway	20	4.07332	0.000697004	ENSG00000105971, ENSG00000150593, ENSG00000146197, ENSG00000116985, ENSG00000139269, ENSG00000137642, ENSG00000150938, ENSG00000147869, ENSG00000168743, ENSG00000163430, ENSG00000166147, ENSG00000123999, ENSG00000187045, ENSG00000143869, ENSG00000137261, ENSG00000108187, ENSG00000050165, ENSG00000106031, ENSG00000164488, ENSG00000104880	411	388	19277	2.41766	0.0569018
GO TERM: BP	GO:0007167~enzyme linked receptor protein signaling pathway	GO:0007167	enzyme linked receptor protein signaling pathway	41	8.35031	0.00071361	ENSG00000105971, ENSG00000161638, ENSG00000150281, ENSG00000116701, ENSG00000116985, ENSG00000139269, ENSG00000137642, ENSG00000118257, ENSG00000150938, ENSG00000184481, ENSG00000137261, ENSG00000108187, ENSG00000050165, ENSG00000095637, ENSG00000104880, ENSG00000145335, ENSG00000150593, ENSG00000106976, ENSG00000105767, ENSG00000146197, ENSG00000120937, ENSG00000105707, ENSG00000265972, ENSG0000…	411	1103	19277	1.74344	0.0574252
GO TERM: MF	GO:0008237~metallopeptidase activity	GO:0008237	metallopeptidase activity	14	2.85132	0.000732978	ENSG00000102174, ENSG00000158516, ENSG00000104324, ENSG00000106624, ENSG00000106327, ENSG00000145536, ENSG00000086205, ENSG00000117298, ENSG00000187045, ENSG00000135074, ENSG00000166825, ENSG00000164307, ENSG00000072657, ENSG00000049192	381	202	16739	3.04496	0.0403519
GO TERM: MF	GO:0015171~amino acid transmembrane transporter activity	GO:0015171	amino acid transmembrane transporter activity	9	1.83299	0.000743633	ENSG00000112394, ENSG00000106688, ENSG00000130821, ENSG00000099960, ENSG00000123643, ENSG00000107819, ENSG00000152779, ENSG00000139209, ENSG00000104044	381	86	16739	4.59778	0.0403519
GO TERM: BP	GO:0048666~neuron development	GO:0048666	neuron development	43	8.75764	0.000746278	ENSG00000107731, ENSG00000173482, ENSG00000150281, ENSG00000039068, ENSG00000204099, ENSG00000110244, ENSG00000115414, ENSG00000119782, ENSG00000189195, ENSG00000074181, ENSG00000170775, ENSG00000118257, ENSG00000166313, ENSG00000117298, ENSG00000006210, ENSG00000137261, ENSG00000162415, ENSG00000162614, ENSG00000147852, ENSG00000111249, ENSG00000130427, ENSG00000153902, ENSG00000046889, ENSG0000…	411	1179	19277	1.71062	0.058455
GO TERM: BP	GO:0009410~response to xenobiotic stimulus	GO:0009410	response to xenobiotic stimulus	21	4.27699	0.000747162	ENSG00000106688, ENSG00000173482, ENSG00000076258, ENSG00000039068, ENSG00000111674, ENSG00000138109, ENSG00000265972, ENSG00000131781, ENSG00000138115, ENSG00000244474, ENSG00000112293, ENSG00000100307, ENSG00000166741, ENSG00000056972, ENSG00000157150, ENSG00000110090, ENSG00000147872, ENSG00000010932, ENSG00000108576, ENSG00000145730, ENSG00000145335	411	421	19277	2.33956	0.058455
GO TERM: CC	GO:0016342~catenin complex	GO:0016342	catenin complex	6	1.222	0.000747717	ENSG00000170558, ENSG00000113361, ENSG00000079112, ENSG00000166341, ENSG00000039068, ENSG00000113100	396	32	17223	8.15483	0.0181944
GO TERM: BP	GO:0050770~regulation of axonogenesis	GO:0050770	regulation of axonogenesis	13	2.64766	0.000789408	ENSG00000115414, ENSG00000132003, ENSG00000082684, ENSG00000170558, ENSG00000136040, ENSG00000137261, ENSG00000010319, ENSG00000149269, ENSG00000162415, ENSG00000187688, ENSG00000143320, ENSG00000145147, ENSG00000185008	411	190	19277	3.20913	0.0609142
GO TERM: CC	GO:0030054~cell junction	GO:0030054	cell junction	40	8.14664	0.000791892	ENSG00000105971, ENSG00000161638, ENSG00000173482, ENSG00000128591, ENSG00000039068, ENSG00000148180, ENSG00000095383, ENSG00000118898, ENSG00000008256, ENSG00000160593, ENSG00000143153, ENSG00000095637, ENSG00000162614, ENSG00000079308, ENSG00000104880, ENSG00000104881, ENSG00000168955, ENSG00000073008, ENSG00000105767, ENSG00000114019, ENSG00000104419, ENSG00000116117, ENSG00000171992, ENSG0000…	396	997	17223	1.74493	0.0184986
GO TERM: BP	GO:0010038~response to metal ion	GO:0010038	response to metal ion	20	4.07332	0.000836848	ENSG00000158856, ENSG00000106688, ENSG00000106327, ENSG00000039068, ENSG00000134013, ENSG00000138823, ENSG00000104419, ENSG00000265972, ENSG00000196139, ENSG00000148180, ENSG00000135643, ENSG00000147869, ENSG00000112293, ENSG00000113140, ENSG00000166313, ENSG00000120049, ENSG00000120129, ENSG00000145730, ENSG00000109610, ENSG00000145335	411	394	19277	2.38085	0.0637022
GO TERM: BP	GO:0001655~urogenital system development	GO:0001655	urogenital system development	19	3.86965	0.000854151	ENSG00000137869, ENSG00000197410, ENSG00000074181, ENSG00000145536, ENSG00000147869, ENSG00000168743, ENSG00000166147, ENSG00000077092, ENSG00000056972, ENSG00000166341, ENSG00000122870, ENSG00000121361, ENSG00000100311, ENSG00000128713, ENSG00000106031, ENSG00000164488, ENSG00000145147, ENSG00000185008, ENSG00000049192	411	364	19277	2.44822	0.0641525
GO TERM: BP	GO:0030162~regulation of proteolysis	GO:0030162	regulation of proteolysis	34	6.92464	0.00094291	ENSG00000129521, ENSG00000181104, ENSG00000106688, ENSG00000149131, ENSG00000107738, ENSG00000115414, ENSG00000148180, ENSG00000137642, ENSG00000021852, ENSG00000150938, ENSG00000078081, ENSG00000123843, ENSG00000157150, ENSG00000100665, ENSG00000099937, ENSG00000055957, ENSG00000123561, ENSG00000089163, ENSG00000145335, ENSG00000168955, ENSG00000181634, ENSG00000132109, ENSG00000137831, ENSG0000…	411	867	19277	1.83932	0.0693339
GO TERM: BP	GO:0046890~regulation of lipid biosynthetic process	GO:0046890	regulation of lipid biosynthetic process	13	2.64766	0.000947756	ENSG00000153395, ENSG00000110244, ENSG00000196139, ENSG00000112293, ENSG00000142784, ENSG00000142178, ENSG00000050165, ENSG00000182156, ENSG00000100311, ENSG00000095637, ENSG00000124253, ENSG00000089163, ENSG00000165953	411	194	19277	3.14296	0.0693339
GO TERM: BP	GO:0043086~negative regulation of catalytic activity	GO:0043086	negative regulation of catalytic activity	34	6.92464	0.00103982	ENSG00000179841, ENSG00000155792, ENSG00000149131, ENSG00000119782, ENSG00000137642, ENSG00000150938, ENSG00000142784, ENSG00000138496, ENSG00000080031, ENSG00000165861, ENSG00000138772, ENSG00000078081, ENSG00000157150, ENSG00000100665, ENSG00000127329, ENSG00000058668, ENSG00000099937, ENSG00000055957, ENSG00000123561, ENSG00000145335, ENSG00000150593, ENSG00000132703, ENSG00000131370, ENSG0000…	411	872	19277	1.82877	0.0750936
GO TERM: BP	GO:0022604~regulation of cell morphogenesis	GO:0022604	regulation of cell morphogenesis	23	4.68432	0.00108193	ENSG00000158856, ENSG00000111249, ENSG00000127084, ENSG00000136960, ENSG00000117228, ENSG00000105707, ENSG00000115414, ENSG00000132003, ENSG00000082684, ENSG00000170558, ENSG00000136040, ENSG00000113140, ENSG00000137261, ENSG00000010319, ENSG00000149269, ENSG00000162415, ENSG00000187688, ENSG00000143320, ENSG00000145147, ENSG00000185008, ENSG00000165215, ENSG00000127831, ENSG00000104880	411	499	19277	2.16185	0.0771454
GO TERM: BP	GO:0007156~homophilic cell adhesion via plasma membrane adhesion molecules	GO:0007156	homophilic cell adhesion via plasma membrane adhesion molecules	12	2.44399	0.00111361	ENSG00000099834, ENSG00000170558, ENSG00000113361, ENSG00000073008, ENSG00000079112, ENSG00000173482, ENSG00000166341, ENSG00000039068, ENSG00000197410, ENSG00000162614, ENSG00000185008, ENSG00000113100	411	171	19277	3.29142	0.0782433
GO TERM: MF	GO:0061134~peptidase regulator activity	GO:0061134	peptidase regulator activity	15	3.05499	0.00111808	ENSG00000149131, ENSG00000107738, ENSG00000115414, ENSG00000150938, ENSG00000166145, ENSG00000157150, ENSG00000100665, ENSG00000099937, ENSG00000055957, ENSG00000127831, ENSG00000123561, ENSG00000186910, ENSG00000124102, ENSG00000165953, ENSG00000145335	381	238	16739	2.76897	0.0576368
GO TERM: BP	GO:0006082~organic acid metabolic process	GO:0006082	organic acid metabolic process	42	8.55397	0.0011251	ENSG00000129521, ENSG00000155850, ENSG00000173083, ENSG00000072682, ENSG00000111674, ENSG00000110244, ENSG00000135220, ENSG00000156966, ENSG00000138115, ENSG00000142784, ENSG00000140284, ENSG00000118514, ENSG00000008311, ENSG00000103316, ENSG00000058668, ENSG00000145730, ENSG00000124253, ENSG00000089163, ENSG00000145335, ENSG00000124212, ENSG00000103066, ENSG00000156510, ENSG00000197142, ENSG0000…	411	1167	19277	1.68801	0.0782433
GO TERM: BP	GO:0001822~kidney development	GO:0001822	kidney development	17	3.46232	0.0011565	ENSG00000197410, ENSG00000074181, ENSG00000145536, ENSG00000147869, ENSG00000168743, ENSG00000166147, ENSG00000077092, ENSG00000056972, ENSG00000166341, ENSG00000122870, ENSG00000121361, ENSG00000100311, ENSG00000128713, ENSG00000164488, ENSG00000145147, ENSG00000185008, ENSG00000049192	411	313	19277	2.54743	0.079446
GO TERM: MF	GO:0004866~endopeptidase inhibitor activity	GO:0004866	endopeptidase inhibitor activity	13	2.64766	0.00118947	ENSG00000149131, ENSG00000150938, ENSG00000166145, ENSG00000157150, ENSG00000100665, ENSG00000099937, ENSG00000055957, ENSG00000127831, ENSG00000123561, ENSG00000186910, ENSG00000124102, ENSG00000165953, ENSG00000145335	381	187	16739	3.05426	0.0576796
GO TERM: BP	GO:0072337~modified amino acid transport	GO:0072337	modified amino acid transport	6	1.222	0.00119604	ENSG00000134538, ENSG00000112394, ENSG00000130821, ENSG00000103316, ENSG00000152779, ENSG00000123561	411	38	19277	7.40569	0.0811722
GO TERM: BP	GO:0022603~regulation of anatomical structure morphogenesis	GO:0022603	regulation of anatomical structure morphogenesis	43	8.75764	0.00121288	ENSG00000161638, ENSG00000127084, ENSG00000065970, ENSG00000173482, ENSG00000205220, ENSG00000115414, ENSG00000184481, ENSG00000006210, ENSG00000138772, ENSG00000128917, ENSG00000183098, ENSG00000137261, ENSG00000162415, ENSG00000058668, ENSG00000104880, ENSG00000124212, ENSG00000158856, ENSG00000111249, ENSG00000132669, ENSG00000136960, ENSG00000117228, ENSG00000120937, ENSG00000105707, ENSG0000…	411	1209	19277	1.66817	0.0813354
GO TERM: CC	GO:0098857~membrane microdomain	GO:0098857	membrane microdomain	19	3.86965	0.00122777	ENSG00000179841, ENSG00000105971, ENSG00000181104, ENSG00000107731, ENSG00000173083, ENSG00000106688, ENSG00000039068, ENSG00000104537, ENSG00000111674, ENSG00000076641, ENSG00000170558, ENSG00000174827, ENSG00000166340, ENSG00000167552, ENSG00000143153, ENSG00000058668, ENSG00000095637, ENSG00000108576, ENSG00000124212	396	349	17223	2.36778	0.0265562
GO TERM: CC	GO:0045121~membrane raft	GO:0045121	membrane raft	19	3.86965	0.00122777	ENSG00000179841, ENSG00000105971, ENSG00000181104, ENSG00000107731, ENSG00000173083, ENSG00000106688, ENSG00000039068, ENSG00000104537, ENSG00000111674, ENSG00000076641, ENSG00000170558, ENSG00000174827, ENSG00000166340, ENSG00000167552, ENSG00000143153, ENSG00000058668, ENSG00000095637, ENSG00000108576, ENSG00000124212	396	349	17223	2.36778	0.0265562
GO TERM: MF	GO:0008509~anion transmembrane transporter activity	GO:0008509	anion transmembrane transporter activity	18	3.66599	0.0012308	ENSG00000134538, ENSG00000155850, ENSG00000106688, ENSG00000130821, ENSG00000174640, ENSG00000170482, ENSG00000109738, ENSG00000099960, ENSG00000151834, ENSG00000107819, ENSG00000152779, ENSG00000139209, ENSG00000112394, ENSG00000117262, ENSG00000123643, ENSG00000104044, ENSG00000146039, ENSG00000148942	381	324	16739	2.4408	0.0576796
GO TERM: BP	GO:0010035~response to inorganic substance	GO:0010035	response to inorganic substance	26	5.29532	0.00124462	ENSG00000106688, ENSG00000106327, ENSG00000039068, ENSG00000110244, ENSG00000134013, ENSG00000119782, ENSG00000148180, ENSG00000135643, ENSG00000170775, ENSG00000166313, ENSG00000058668, ENSG00000145730, ENSG00000109610, ENSG00000145335, ENSG00000158856, ENSG00000102174, ENSG00000138823, ENSG00000104419, ENSG00000265972, ENSG00000196139, ENSG00000156711, ENSG00000147869, ENSG00000112293, ENSG0000…	411	604	19277	2.01899	0.0818719
GO TERM: BP	GO:0010810~regulation of cell-substrate adhesion	GO:0010810	regulation of cell-substrate adhesion	14	2.85132	0.00124995	ENSG00000158856, ENSG00000161638, ENSG00000064042, ENSG00000106823, ENSG00000132669, ENSG00000117228, ENSG00000115414, ENSG00000204580, ENSG00000172638, ENSG00000168743, ENSG00000006210, ENSG00000169499, ENSG00000100311, ENSG00000091986	411	228	19277	2.87999	0.0818719
GO TERM: BP	GO:0031589~cell-substrate adhesion	GO:0031589	cell-substrate adhesion	19	3.86965	0.00127666	ENSG00000158856, ENSG00000161638, ENSG00000173083, ENSG00000064042, ENSG00000106823, ENSG00000132669, ENSG00000169231, ENSG00000140092, ENSG00000117228, ENSG00000115414, ENSG00000204580, ENSG00000172638, ENSG00000168743, ENSG00000006210, ENSG00000169499, ENSG00000100311, ENSG00000091986, ENSG00000095637, ENSG00000074527	411	377	19277	2.3638	0.0824429
GO TERM: BP	GO:0010951~negative regulation of endopeptidase activity	GO:0010951	negative regulation of endopeptidase activity	15	3.05499	0.00132235	ENSG00000149131, ENSG00000137642, ENSG00000150938, ENSG00000166145, ENSG00000078081, ENSG00000157150, ENSG00000100665, ENSG00000099937, ENSG00000055957, ENSG00000127831, ENSG00000123561, ENSG00000186910, ENSG00000124102, ENSG00000165953, ENSG00000145335	411	258	19277	2.7269	0.0824429
GO TERM: MF	GO:0008235~metalloexopeptidase activity	GO:0008235	metalloexopeptidase activity	8	1.62933	0.00132288	ENSG00000086205, ENSG00000158516, ENSG00000104324, ENSG00000106624, ENSG00000106327, ENSG00000166825, ENSG00000164307, ENSG00000072657	381	73	16739	4.81473	0.0592995
GO TERM: BP	GO:0001525~angiogenesis	GO:0001525	angiogenesis	26	5.29532	0.00133168	ENSG00000161638, ENSG00000107731, ENSG00000173083, ENSG00000065970, ENSG00000173482, ENSG00000134013, ENSG00000115414, ENSG00000074181, ENSG00000118257, ENSG00000184481, ENSG00000006210, ENSG00000138772, ENSG00000128917, ENSG00000127329, ENSG00000058668, ENSG00000124212, ENSG00000114019, ENSG00000120937, ENSG00000112293, ENSG00000113140, ENSG00000164683, ENSG00000167772, ENSG00000166825, ENSG0000…	411	607	19277	2.00901	0.0824429
GO TERM: BP	GO:0051806~entry into cell of other organism involved in symbiotic interaction	GO:0051806	entry into cell of other organism involved in symbiotic interaction	11	2.24033	0.00134648	ENSG00000105971, ENSG00000161638, ENSG00000073008, ENSG00000132109, ENSG00000132703, ENSG00000039068, ENSG00000166825, ENSG00000135047, ENSG00000185201, ENSG00000113249, ENSG00000148180	411	149	19277	3.46261	0.0824429
GO TERM: BP	GO:0030260~entry into host cell	GO:0030260	entry into host cell	11	2.24033	0.00134648	ENSG00000105971, ENSG00000161638, ENSG00000073008, ENSG00000132109, ENSG00000132703, ENSG00000039068, ENSG00000166825, ENSG00000135047, ENSG00000185201, ENSG00000113249, ENSG00000148180	411	149	19277	3.46261	0.0824429
GO TERM: BP	GO:0044409~entry into host	GO:0044409	entry into host	11	2.24033	0.00134648	ENSG00000105971, ENSG00000161638, ENSG00000073008, ENSG00000132109, ENSG00000132703, ENSG00000039068, ENSG00000166825, ENSG00000135047, ENSG00000185201, ENSG00000113249, ENSG00000148180	411	149	19277	3.46261	0.0824429
GO TERM: BP	GO:0070327~thyroid hormone transport	GO:0070327	thyroid hormone transport	4	0.814664	0.00138784	ENSG00000134538, ENSG00000112394, ENSG00000103316, ENSG00000123561	411	11	19277	17.0555	0.0839091
GO TERM: BP	GO:0001763~morphogenesis of a branching structure	GO:0001763	morphogenesis of a branching structure	13	2.64766	0.00140022	ENSG00000117139, ENSG00000204580, ENSG00000145536, ENSG00000168743, ENSG00000166145, ENSG00000128917, ENSG00000143869, ENSG00000166341, ENSG00000149269, ENSG00000128713, ENSG00000106031, ENSG00000145147, ENSG00000074527	411	203	19277	3.00362	0.0839091
GO TERM: BP	GO:0048667~cell morphogenesis involved in neuron differentiation	GO:0048667	cell morphogenesis involved in neuron differentiation	26	5.29532	0.00143036	ENSG00000107731, ENSG00000173482, ENSG00000115414, ENSG00000074181, ENSG00000118257, ENSG00000166313, ENSG00000117298, ENSG00000137261, ENSG00000162415, ENSG00000162614, ENSG00000147852, ENSG00000111249, ENSG00000046889, ENSG00000132003, ENSG00000082684, ENSG00000136040, ENSG00000143869, ENSG00000010319, ENSG00000149269, ENSG00000187688, ENSG00000145147, ENSG00000106078, ENSG00000185008, ENSG0000…	411	610	19277	1.99913	0.084813
GO TERM: BP	GO:0030155~regulation of cell adhesion	GO:0030155	regulation of cell adhesion	32	6.51731	0.00144871	ENSG00000161638, ENSG00000064042, ENSG00000106823, ENSG00000112769, ENSG00000107738, ENSG00000039068, ENSG00000076641, ENSG00000181284, ENSG00000115414, ENSG00000148180, ENSG00000204592, ENSG00000167080, ENSG00000006210, ENSG00000008256, ENSG00000205502, ENSG00000124253, ENSG00000158856, ENSG00000132669, ENSG00000130427, ENSG00000117228, ENSG00000204580, ENSG00000136040, ENSG00000172638, ENSG0000…	411	819	19277	1.83258	0.085006
GO TERM: BP	GO:0071346~cellular response to interferon-gamma	GO:0071346	cellular response to interferon-gamma	12	2.44399	0.00147057	ENSG00000138496, ENSG00000006210, ENSG00000173193, ENSG00000132109, ENSG00000206503, ENSG00000089127, ENSG00000162645, ENSG00000117228, ENSG00000148180, ENSG00000117226, ENSG00000111331, ENSG00000204592	411	177	19277	3.17984	0.0853991
GO TERM: BP	GO:0072001~renal system development	GO:0072001	renal system development	17	3.46232	0.00154837	ENSG00000197410, ENSG00000074181, ENSG00000145536, ENSG00000147869, ENSG00000168743, ENSG00000166147, ENSG00000077092, ENSG00000056972, ENSG00000166341, ENSG00000122870, ENSG00000121361, ENSG00000100311, ENSG00000128713, ENSG00000164488, ENSG00000145147, ENSG00000185008, ENSG00000049192	411	322	19277	2.47623	0.088864
GO TERM: BP	GO:0051604~protein maturation	GO:0051604	protein maturation	21	4.27699	0.00156178	ENSG00000102174, ENSG00000106327, ENSG00000149131, ENSG00000107738, ENSG00000135047, ENSG00000119782, ENSG00000105707, ENSG00000115257, ENSG00000148180, ENSG00000137642, ENSG00000177669, ENSG00000021852, ENSG00000163131, ENSG00000117298, ENSG00000139178, ENSG00000138496, ENSG00000055163, ENSG00000123843, ENSG00000135074, ENSG00000128965, ENSG00000089163	411	448	19277	2.19856	0.088864
GO TERM: BP	GO:0023051~regulation of signaling	GO:0023051	regulation of signaling	108	21.9959	0.00158952	ENSG00000181104, ENSG00000106688, ENSG00000106327, ENSG00000150281, ENSG00000117298, ENSG00000128917, ENSG00000183098, ENSG00000108187, ENSG00000050165, ENSG00000132109, ENSG00000179399, ENSG00000075461, ENSG00000150551, ENSG00000174938, ENSG00000121858, ENSG00000123999, ENSG00000187045, ENSG00000120129, ENSG00000110090, ENSG00000143869, ENSG00000106031, ENSG00000108576, ENSG00000165953, ENSG0000…	411	3863	19277	1.31128	0.0893637
GO TERM: MF	GO:0043394~proteoglycan binding	GO:0043394	proteoglycan binding	6	1.222	0.00159145	ENSG00000163131, ENSG00000173083, ENSG00000135047, ENSG00000144152, ENSG00000115414, ENSG00000145147	381	38	16739	6.93701	0.0659393
GO TERM: BP	GO:0006935~chemotaxis	GO:0006935	chemotaxis	28	5.70265	0.0016023	ENSG00000107731, ENSG00000137869, ENSG00000173482, ENSG00000181284, ENSG00000074181, ENSG00000118257, ENSG00000170689, ENSG00000117298, ENSG00000006210, ENSG00000160593, ENSG00000164251, ENSG00000124875, ENSG00000162415, ENSG00000162614, ENSG00000099937, ENSG00000147852, ENSG00000136960, ENSG00000132003, ENSG00000082684, ENSG00000136040, ENSG00000143869, ENSG00000120129, ENSG00000010319, ENSG0000…	411	684	19277	1.91999	0.0893637
GO TERM: MF	GO:0030414~peptidase inhibitor activity	GO:0030414	peptidase inhibitor activity	13	2.64766	0.00162707	ENSG00000149131, ENSG00000150938, ENSG00000166145, ENSG00000157150, ENSG00000100665, ENSG00000099937, ENSG00000055957, ENSG00000127831, ENSG00000123561, ENSG00000186910, ENSG00000124102, ENSG00000165953, ENSG00000145335	381	194	16739	2.94406	0.0659393
GO TERM: MF	GO:1901681~sulfur compound binding	GO:1901681	sulfur compound binding	16	3.25866	0.00166287	ENSG00000106823, ENSG00000169231, ENSG00000115414, ENSG00000118257, ENSG00000172638, ENSG00000119711, ENSG00000163430, ENSG00000166147, ENSG00000163898, ENSG00000144152, ENSG00000124875, ENSG00000091986, ENSG00000145147, ENSG00000099937, ENSG00000109610, ENSG00000166833	381	276	16739	2.54692	0.0659393
GO TERM: BP	GO:0042330~taxis	GO:0042330	taxis	28	5.70265	0.00174942	ENSG00000107731, ENSG00000137869, ENSG00000173482, ENSG00000181284, ENSG00000074181, ENSG00000118257, ENSG00000170689, ENSG00000117298, ENSG00000006210, ENSG00000160593, ENSG00000164251, ENSG00000124875, ENSG00000162415, ENSG00000162614, ENSG00000099937, ENSG00000147852, ENSG00000136960, ENSG00000132003, ENSG00000082684, ENSG00000136040, ENSG00000143869, ENSG00000120129, ENSG00000010319, ENSG0000…	411	688	19277	1.90883	0.0951331
GO TERM: BP	GO:0097435~supramolecular fiber organization	GO:0097435	supramolecular fiber organization	34	6.92464	0.00176785	ENSG00000156587, ENSG00000064042, ENSG00000111799, ENSG00000072682, ENSG00000106624, ENSG00000128591, ENSG00000176771, ENSG00000110244, ENSG00000134013, ENSG00000148180, ENSG00000137642, ENSG00000138131, ENSG00000006210, ENSG00000164251, ENSG00000049089, ENSG00000095637, ENSG00000104880, ENSG00000187955, ENSG00000145335, ENSG00000158856, ENSG00000105048, ENSG00000132703, ENSG00000173991, ENSG0000…	411	902	19277	1.76795	0.0951331
GO TERM: BP	GO:0007507~heart development	GO:0007507	heart development	26	5.29532	0.00178398	ENSG00000115414, ENSG00000118257, ENSG00000117298, ENSG00000077092, ENSG00000128917, ENSG00000122870, ENSG00000121361, ENSG00000163703, ENSG00000145730, ENSG00000104881, ENSG00000150593, ENSG00000173991, ENSG00000120937, ENSG00000147869, ENSG00000113140, ENSG00000142178, ENSG00000164683, ENSG00000166147, ENSG00000056972, ENSG00000166341, ENSG00000149269, ENSG00000106031, ENSG00000100311, ENSG0000…	411	619	19277	1.97006	0.0951331
GO TERM: BP	GO:0019585~glucuronate metabolic process	GO:0019585	glucuronate metabolic process	5	1.01833	0.00179018	ENSG00000165475, ENSG00000156096, ENSG00000171234, ENSG00000135220, ENSG00000244474	411	25	19277	9.38054	0.0951331
GO TERM: BP	GO:0006063~uronic acid metabolic process	GO:0006063	uronic acid metabolic process	5	1.01833	0.00179018	ENSG00000165475, ENSG00000156096, ENSG00000171234, ENSG00000135220, ENSG00000244474	411	25	19277	9.38054	0.0951331
GO TERM: BP	GO:0051055~negative regulation of lipid biosynthetic process	GO:0051055	negative regulation of lipid biosynthetic process	7	1.42566	0.00184705	ENSG00000142784, ENSG00000142178, ENSG00000153395, ENSG00000050165, ENSG00000100311, ENSG00000196139, ENSG00000165953	411	61	19277	5.38227	0.096765
GO TERM: BP	GO:0030001~metal ion transport	GO:0030001	metal ion transport	35	7.12831	0.00185627	ENSG00000181104, ENSG00000106688, ENSG00000197375, ENSG00000106327, ENSG00000198743, ENSG00000065534, ENSG00000119782, ENSG00000139209, ENSG00000171227, ENSG00000158865, ENSG00000135643, ENSG00000175938, ENSG00000006210, ENSG00000136052, ENSG00000143153, ENSG00000121361, ENSG00000058668, ENSG00000148942, ENSG00000145335, ENSG00000185339, ENSG00000047457, ENSG00000130821, ENSG00000130427, ENSG0000…	411	940	19277	1.74638	0.096765
GO TERM: BP	GO:0007399~nervous system development	GO:0007399	nervous system development	76	15.4786	0.0018741	ENSG00000107731, ENSG00000106688, ENSG00000173482, ENSG00000150281, ENSG00000198743, ENSG00000189195, ENSG00000170775, ENSG00000166313, ENSG00000117298, ENSG00000157150, ENSG00000128917, ENSG00000183098, ENSG00000137261, ENSG00000145730, ENSG00000080293, ENSG00000166833, ENSG00000145335, ENSG00000128242, ENSG00000153902, ENSG00000104419, ENSG00000046889, ENSG00000204580, ENSG00000174469, ENSG0000…	411	2541	19277	1.40283	0.096765
GO TERM: BP	GO:0043903~regulation of symbiosis, encompassing mutualism through parasitism	GO:0043903	regulation of symbiosis, encompassing mutualism through parasitism	18	3.66599	0.00188961	ENSG00000105971, ENSG00000244509, ENSG00000132703, ENSG00000132109, ENSG00000174992, ENSG00000179750, ENSG00000105707, ENSG00000008517, ENSG00000148180, ENSG00000111331, ENSG00000138496, ENSG00000078081, ENSG00000056972, ENSG00000164251, ENSG00000089127, ENSG00000185201, ENSG00000124875, ENSG00000107201	411	359	19277	2.35167	0.096765
GO TERM: BP	GO:0051241~negative regulation of multicellular organismal process	GO:0051241	negative regulation of multicellular organismal process	47	9.5723	0.00192968	ENSG00000181104, ENSG00000156587, ENSG00000065970, ENSG00000149131, ENSG00000173482, ENSG00000107738, ENSG00000204099, ENSG00000134013, ENSG00000115414, ENSG00000119782, ENSG00000111331, ENSG00000074181, ENSG00000137642, ENSG00000150938, ENSG00000184481, ENSG00000006210, ENSG00000077092, ENSG00000128917, ENSG00000089127, ENSG00000164251, ENSG00000137261, ENSG00000108187, ENSG00000058668, ENSG0000…	411	1392	19277	1.58364	0.0979268
GO TERM: MF	GO:0005102~receptor binding	GO:0005102	receptor binding	59	12.0163	0.00198938	ENSG00000181104, ENSG00000112769, ENSG00000150281, ENSG00000204592, ENSG00000166313, ENSG00000128917, ENSG00000164251, ENSG00000050165, ENSG00000121361, ENSG00000124875, ENSG00000160654, ENSG00000075461, ENSG00000150551, ENSG00000147869, ENSG00000168743, ENSG00000160181, ENSG00000186470, ENSG00000121858, ENSG00000167772, ENSG00000131094, ENSG00000143869, ENSG00000123999, ENSG00000010319, ENSG0000…	381	1748	16739	1.48291	0.0759649
GO TERM: CC	GO:0098589~membrane region	GO:0098589	membrane region	21	4.27699	0.0020533	ENSG00000099834, ENSG00000179841, ENSG00000105971, ENSG00000181104, ENSG00000107731, ENSG00000173083, ENSG00000106688, ENSG00000039068, ENSG00000104537, ENSG00000111674, ENSG00000076641, ENSG00000170558, ENSG00000174827, ENSG00000166340, ENSG00000167552, ENSG00000143153, ENSG00000058668, ENSG00000095637, ENSG00000108576, ENSG00000147852, ENSG00000124212	396	426	17223	2.14399	0.042439
GO TERM: MF	GO:0008238~exopeptidase activity	GO:0008238	exopeptidase activity	10	2.03666	0.00208681	ENSG00000086205, ENSG00000158516, ENSG00000104324, ENSG00000166340, ENSG00000106624, ENSG00000106327, ENSG00000166825, ENSG00000164307, ENSG00000105707, ENSG00000072657	381	124	16739	3.5431	0.0768393
GO TERM: BP	GO:0010466~negative regulation of peptidase activity	GO:0010466	negative regulation of peptidase activity	15	3.05499	0.00209162	ENSG00000149131, ENSG00000137642, ENSG00000150938, ENSG00000166145, ENSG00000078081, ENSG00000157150, ENSG00000100665, ENSG00000099937, ENSG00000055957, ENSG00000127831, ENSG00000123561, ENSG00000186910, ENSG00000124102, ENSG00000165953, ENSG00000145335	411	271	19277	2.59609	0.104781
GO TERM: CC	GO:0072562~blood microparticle	GO:0072562	blood microparticle	11	2.24033	0.00210742	ENSG00000108679, ENSG00000139178, ENSG00000047457, ENSG00000132703, ENSG00000167772, ENSG00000149131, ENSG00000110244, ENSG00000145321, ENSG00000115414, ENSG00000055957, ENSG00000148180	396	147	17223	3.25454	0.042439
GO TERM: BP	GO:0030334~regulation of cell migration	GO:0030334	regulation of cell migration	37	7.53564	0.00210916	ENSG00000161638, ENSG00000181104, ENSG00000064042, ENSG00000137869, ENSG00000112769, ENSG00000173482, ENSG00000107738, ENSG00000039068, ENSG00000181284, ENSG00000065534, ENSG00000115414, ENSG00000137642, ENSG00000118257, ENSG00000184481, ENSG00000006210, ENSG00000138772, ENSG00000128917, ENSG00000164251, ENSG00000108187, ENSG00000162614, ENSG00000058668, ENSG00000158856, ENSG00000132669, ENSG0000…	411	1021	19277	1.69971	0.104781
GO TERM: BP	GO:0036293~response to decreased oxygen levels	GO:0036293	response to decreased oxygen levels	19	3.86965	0.00212054	ENSG00000129521, ENSG00000106688, ENSG00000130427, ENSG00000205220, ENSG00000134013, ENSG00000104419, ENSG00000152952, ENSG00000165730, ENSG00000137463, ENSG00000167772, ENSG00000149269, ENSG00000143153, ENSG00000108576, ENSG00000145730, ENSG00000124253, ENSG00000165215, ENSG00000109610, ENSG00000089163, ENSG00000124212	411	395	19277	2.25608	0.104781
GO TERM: BP	GO:0006865~amino acid transport	GO:0006865	amino acid transport	11	2.24033	0.00218266	ENSG00000112394, ENSG00000106688, ENSG00000130821, ENSG00000147003, ENSG00000099960, ENSG00000123643, ENSG00000107819, ENSG00000152779, ENSG00000139209, ENSG00000104044, ENSG00000145335	411	159	19277	3.24484	0.106818
GO TERM: BP	GO:0044242~cellular lipid catabolic process	GO:0044242	cellular lipid catabolic process	14	2.85132	0.0021997	ENSG00000103066, ENSG00000130768, ENSG00000204099, ENSG00000136960, ENSG00000110244, ENSG00000196139, ENSG00000137642, ENSG00000112293, ENSG00000140284, ENSG00000110090, ENSG00000163898, ENSG00000182156, ENSG00000179163, ENSG00000124253	411	243	19277	2.70221	0.106818
GO TERM: CC	GO:0005614~interstitial matrix	GO:0005614	interstitial matrix	4	0.814664	0.00225763	ENSG00000106823, ENSG00000091986, ENSG00000187955, ENSG00000166833	396	12	17223	14.4975	0.0439486
GO TERM: MF	GO:0015145~monosaccharide transmembrane transporter activity	GO:0015145	monosaccharide transmembrane transporter activity	5	1.01833	0.00226667	ENSG00000173262, ENSG00000170482, ENSG00000198743, ENSG00000158865, ENSG00000059804	381	25	16739	8.78688	0.080584
GO TERM: BP	GO:0060429~epithelium development	GO:0060429	epithelium development	46	9.36864	0.00227123	ENSG00000161638, ENSG00000173083, ENSG00000135047, ENSG00000205220, ENSG00000117139, ENSG00000099284, ENSG00000145536, ENSG00000117298, ENSG00000118898, ENSG00000077092, ENSG00000128917, ENSG00000183098, ENSG00000164251, ENSG00000128713, ENSG00000124253, ENSG00000173991, ENSG00000265972, ENSG00000196139, ENSG00000196975, ENSG00000204580, ENSG00000147869, ENSG00000170558, ENSG00000168743, ENSG0000…	411	1365	19277	1.5806	0.109087
GO TERM: BP	GO:0010646~regulation of cell communication	GO:0010646	regulation of cell communication	106	21.5886	0.00228516	ENSG00000181104, ENSG00000106688, ENSG00000106327, ENSG00000150281, ENSG00000128917, ENSG00000183098, ENSG00000108187, ENSG00000050165, ENSG00000132109, ENSG00000179399, ENSG00000075461, ENSG00000150551, ENSG00000174938, ENSG00000121858, ENSG00000123999, ENSG00000187045, ENSG00000120129, ENSG00000110090, ENSG00000143869, ENSG00000106031, ENSG00000108576, ENSG00000165953, ENSG00000179841, ENSG0000…	411	3819	19277	1.30183	0.109087
GO TERM: BP	GO:0019752~carboxylic acid metabolic process	GO:0019752	carboxylic acid metabolic process	37	7.53564	0.00242543	ENSG00000129521, ENSG00000072682, ENSG00000111674, ENSG00000110244, ENSG00000135220, ENSG00000138115, ENSG00000142784, ENSG00000140284, ENSG00000118514, ENSG00000008311, ENSG00000103316, ENSG00000058668, ENSG00000145730, ENSG00000124253, ENSG00000089163, ENSG00000145335, ENSG00000124212, ENSG00000103066, ENSG00000156510, ENSG00000197142, ENSG00000130821, ENSG00000170482, ENSG00000171234, ENSG0000…	411	1030	19277	1.68485	0.114002
GO TERM: BP	GO:0030030~cell projection organization	GO:0030030	cell projection organization	54	10.998	0.00242958	ENSG00000107731, ENSG00000173482, ENSG00000065534, ENSG00000189195, ENSG00000170775, ENSG00000145536, ENSG00000084731, ENSG00000166313, ENSG00000117298, ENSG00000164251, ENSG00000137261, ENSG00000142227, ENSG00000168778, ENSG00000046889, ENSG00000204580, ENSG00000174469, ENSG00000122507, ENSG00000143869, ENSG00000010319, ENSG00000187688, ENSG00000106078, ENSG00000127831, ENSG00000125650, ENSG0000…	411	1680	19277	1.50759	0.114002
GO TERM: BP	GO:0006812~cation transport	GO:0006812	cation transport	42	8.55397	0.00244883	ENSG00000181104, ENSG00000106688, ENSG00000197375, ENSG00000106327, ENSG00000198743, ENSG00000170175, ENSG00000065534, ENSG00000119782, ENSG00000139209, ENSG00000171227, ENSG00000158865, ENSG00000135643, ENSG00000175938, ENSG00000174827, ENSG00000006210, ENSG00000136052, ENSG00000123643, ENSG00000143153, ENSG00000121361, ENSG00000058668, ENSG00000104044, ENSG00000143036, ENSG00000148942, ENSG0000…	411	1217	19277	1.61866	0.114002
GO TERM: MF	GO:0015144~carbohydrate transmembrane transporter activity	GO:0015144	carbohydrate transmembrane transporter activity	6	1.222	0.0025047	ENSG00000173262, ENSG00000170482, ENSG00000198743, ENSG00000143595, ENSG00000158865, ENSG00000059804	381	42	16739	6.27634	0.0833015
GO TERM: MF	GO:1901476~carbohydrate transporter activity	GO:1901476	carbohydrate transporter activity	6	1.222	0.0025047	ENSG00000173262, ENSG00000170482, ENSG00000198743, ENSG00000143595, ENSG00000158865, ENSG00000059804	381	42	16739	6.27634	0.0833015
GO TERM: BP	GO:0006928~movement of cell or subcellular component	GO:0006928	movement of cell or subcellular component	72	14.664	0.00252703	ENSG00000107731, ENSG00000181104, ENSG00000064042, ENSG00000137869, ENSG00000173482, ENSG00000112769, ENSG00000107738, ENSG00000065534, ENSG00000084731, ENSG00000170689, ENSG00000117298, ENSG00000137463, ENSG00000128917, ENSG00000183098, ENSG00000164251, ENSG00000137261, ENSG00000108187, ENSG00000121361, ENSG00000143153, ENSG00000124875, ENSG00000079308, ENSG00000132669, ENSG00000179399, ENSG0000…	411	2405	19277	1.40415	0.116678
GO TERM: BP	GO:0042551~neuron maturation	GO:0042551	neuron maturation	6	1.222	0.00257835	ENSG00000006210, ENSG00000120049, ENSG00000131094, ENSG00000153902, ENSG00000074527, ENSG00000174469	411	45	19277	6.25369	0.117134
GO TERM: BP	GO:0090287~regulation of cellular response to growth factor stimulus	GO:0090287	regulation of cellular response to growth factor stimulus	17	3.46232	0.00258604	ENSG00000105971, ENSG00000161638, ENSG00000105767, ENSG00000146197, ENSG00000137642, ENSG00000150938, ENSG00000147869, ENSG00000168743, ENSG00000163430, ENSG00000055163, ENSG00000166147, ENSG00000187045, ENSG00000108187, ENSG00000050165, ENSG00000106031, ENSG00000058668, ENSG00000145147	411	339	19277	2.35205	0.117134
GO TERM: BP	GO:0048646~anatomical structure formation involved in morphogenesis	GO:0048646	anatomical structure formation involved in morphogenesis	42	8.55397	0.00261082	ENSG00000161638, ENSG00000107731, ENSG00000173083, ENSG00000106688, ENSG00000111799, ENSG00000137869, ENSG00000065970, ENSG00000173482, ENSG00000128591, ENSG00000134013, ENSG00000115414, ENSG00000074181, ENSG00000118257, ENSG00000184481, ENSG00000006210, ENSG00000138772, ENSG00000128917, ENSG00000161642, ENSG00000127329, ENSG00000058668, ENSG00000124212, ENSG00000105048, ENSG00000173991, ENSG0000…	411	1222	19277	1.61204	0.117134
GO TERM: MF	GO:0072349~modified amino acid transmembrane transporter activity	GO:0072349	modified amino acid transmembrane transporter activity	5	1.01833	0.00263139	ENSG00000134538, ENSG00000112394, ENSG00000130821, ENSG00000197375, ENSG00000152779	381	26	16739	8.44892	0.0847802
GO TERM: BP	GO:1903034~regulation of response to wounding	GO:1903034	regulation of response to wounding	13	2.64766	0.00263572	ENSG00000158856, ENSG00000181104, ENSG00000173083, ENSG00000132703, ENSG00000105767, ENSG00000149131, ENSG00000065534, ENSG00000119782, ENSG00000164251, ENSG00000137261, ENSG00000100311, ENSG00000165215, ENSG00000127831	411	219	19277	2.78418	0.117134
GO TERM: BP	GO:0043436~oxoacid metabolic process	GO:0043436	oxoacid metabolic process	40	8.14664	0.0026569	ENSG00000129521, ENSG00000155850, ENSG00000173083, ENSG00000072682, ENSG00000111674, ENSG00000110244, ENSG00000135220, ENSG00000156966, ENSG00000138115, ENSG00000142784, ENSG00000140284, ENSG00000118514, ENSG00000008311, ENSG00000103316, ENSG00000058668, ENSG00000145730, ENSG00000124253, ENSG00000089163, ENSG00000145335, ENSG00000124212, ENSG00000103066, ENSG00000156510, ENSG00000197142, ENSG0000…	411	1149	19277	1.63282	0.117134
GO TERM: BP	GO:0006638~neutral lipid metabolic process	GO:0006638	neutral lipid metabolic process	10	2.03666	0.00267215	ENSG00000112293, ENSG00000103066, ENSG00000142178, ENSG00000110090, ENSG00000163898, ENSG00000110244, ENSG00000138823, ENSG00000124253, ENSG00000137642, ENSG00000145335	411	137	19277	3.42355	0.117134
GO TERM: BP	GO:0046486~glycerolipid metabolic process	GO:0046486	glycerolipid metabolic process	20	4.07332	0.00268246	ENSG00000103066, ENSG00000102230, ENSG00000128242, ENSG00000153395, ENSG00000136960, ENSG00000110244, ENSG00000138823, ENSG00000137642, ENSG00000112293, ENSG00000084710, ENSG00000142178, ENSG00000060642, ENSG00000169499, ENSG00000110090, ENSG00000163898, ENSG00000163624, ENSG00000100311, ENSG00000124253, ENSG00000168528, ENSG00000143036	411	436	19277	2.1515	0.117134
GO TERM: BP	GO:0046470~phosphatidylcholine metabolic process	GO:0046470	phosphatidylcholine metabolic process	8	1.62933	0.00270767	ENSG00000112293, ENSG00000103066, ENSG00000102230, ENSG00000153395, ENSG00000163624, ENSG00000136960, ENSG00000110244, ENSG00000143036	411	88	19277	4.26388	0.117204
GO TERM: BP	GO:0060341~regulation of cellular localization	GO:0060341	regulation of cellular localization	36	7.33198	0.00272567	ENSG00000135506, ENSG00000179841, ENSG00000181104, ENSG00000106688, ENSG00000039068, ENSG00000198743, ENSG00000119782, ENSG00000148180, ENSG00000135643, ENSG00000115255, ENSG00000137642, ENSG00000174827, ENSG00000138496, ENSG00000006210, ENSG00000266094, ENSG00000183098, ENSG00000137261, ENSG00000108187, ENSG00000095637, ENSG00000058668, ENSG00000089163, ENSG00000145335, ENSG00000158856, ENSG0000…	411	1000	19277	1.6885	0.117204
GO TERM: MF	GO:0050839~cell adhesion molecule binding	GO:0050839	cell adhesion molecule binding	24	4.88798	0.00275753	ENSG00000099834, ENSG00000161638, ENSG00000073008, ENSG00000106823, ENSG00000173482, ENSG00000039068, ENSG00000140092, ENSG00000104419, ENSG00000115414, ENSG00000113100, ENSG00000074181, ENSG00000095383, ENSG00000170558, ENSG00000113361, ENSG00000168743, ENSG00000006210, ENSG00000118898, ENSG00000080031, ENSG00000079112, ENSG00000166147, ENSG00000160593, ENSG00000166341, ENSG00000127329, ENSG0000…	381	536	16739	1.96721	0.0861521
GO TERM: BP	GO:0009966~regulation of signal transduction	GO:0009966	regulation of signal transduction	96	19.5519	0.00288722	ENSG00000107731, ENSG00000181104, ENSG00000173083, ENSG00000150281, ENSG00000170775, ENSG00000221890, ENSG00000008256, ENSG00000128917, ENSG00000183098, ENSG00000164251, ENSG00000137261, ENSG00000108187, ENSG00000050165, ENSG00000080293, ENSG00000145335, ENSG00000150593, ENSG00000132109, ENSG00000130768, ENSG00000179399, ENSG00000137831, ENSG00000075461, ENSG00000150551, ENSG00000046889, ENSG0000…	411	3420	19277	1.31657	0.122858
GO TERM: BP	GO:0071495~cellular response to endogenous stimulus	GO:0071495	cellular response to endogenous stimulus	48	9.77597	0.00290079	ENSG00000105971, ENSG00000106688, ENSG00000039068, ENSG00000135047, ENSG00000117139, ENSG00000116985, ENSG00000137642, ENSG00000150938, ENSG00000142784, ENSG00000184481, ENSG00000012822, ENSG00000077092, ENSG00000137463, ENSG00000128917, ENSG00000108187, ENSG00000050165, ENSG00000095637, ENSG00000058668, ENSG00000124253, ENSG00000104880, ENSG00000145335, ENSG00000158856, ENSG00000102174, ENSG0000…	411	1459	19277	1.54306	0.122858
GO TERM: MF	GO:0005507~copper ion binding	GO:0005507	copper ion binding	7	1.42566	0.00300612	ENSG00000138131, ENSG00000047457, ENSG00000110244, ENSG00000134013, ENSG00000109610, ENSG00000145730, ENSG00000145335	381	63	16739	4.8816	0.0911562
GO TERM: BP	GO:0034767~positive regulation of ion transmembrane transport	GO:0034767	positive regulation of ion transmembrane transport	12	2.44399	0.00301587	ENSG00000163131, ENSG00000181104, ENSG00000174827, ENSG00000006210, ENSG00000120049, ENSG00000197142, ENSG00000118507, ENSG00000147003, ENSG00000143153, ENSG00000075461, ENSG00000135643, ENSG00000145335	411	194	19277	2.9012	0.126779
GO TERM: BP	GO:0022008~neurogenesis	GO:0022008	neurogenesis	55	11.2016	0.00306808	ENSG00000107731, ENSG00000106688, ENSG00000173482, ENSG00000150281, ENSG00000189195, ENSG00000170775, ENSG00000166313, ENSG00000117298, ENSG00000128917, ENSG00000137261, ENSG00000166833, ENSG00000153902, ENSG00000104419, ENSG00000046889, ENSG00000204580, ENSG00000174469, ENSG00000120049, ENSG00000131094, ENSG00000143869, ENSG00000010319, ENSG00000128965, ENSG00000187688, ENSG00000108576, ENSG0000…	411	1739	19277	1.48341	0.127078
GO TERM: BP	GO:0050808~synapse organization	GO:0050808	synapse organization	17	3.46232	0.00309009	ENSG00000181104, ENSG00000106688, ENSG00000111249, ENSG00000039068, ENSG00000109738, ENSG00000170175, ENSG00000151834, ENSG00000171992, ENSG00000113100, ENSG00000174938, ENSG00000170558, ENSG00000006210, ENSG00000188153, ENSG00000131094, ENSG00000183098, ENSG00000185008, ENSG00000145335	411	345	19277	2.31115	0.127078
GO TERM: BP	GO:0046718~viral entry into host cell	GO:0046718	viral entry into host cell	10	2.03666	0.00309066	ENSG00000105971, ENSG00000161638, ENSG00000073008, ENSG00000132109, ENSG00000132703, ENSG00000166825, ENSG00000135047, ENSG00000185201, ENSG00000113249, ENSG00000148180	411	140	19277	3.35019	0.127078
GO TERM: CC	GO:0005911~cell-cell junction	GO:0005911	cell-cell junction	20	4.07332	0.00314618	ENSG00000161638, ENSG00000105767, ENSG00000173482, ENSG00000039068, ENSG00000114019, ENSG00000116117, ENSG00000105707, ENSG00000171992, ENSG00000114796, ENSG00000174469, ENSG00000170558, ENSG00000159261, ENSG00000118898, ENSG00000008256, ENSG00000160593, ENSG00000149269, ENSG00000143153, ENSG00000095637, ENSG00000165215, ENSG00000107201	396	411	17223	2.11642	0.0574671
GO TERM: CC	GO:0031528~microvillus membrane	GO:0031528	microvillus membrane	5	1.01833	0.00314888	ENSG00000099834, ENSG00000174827, ENSG00000155850, ENSG00000080031, ENSG00000138823	396	27	17223	8.05415	0.0574671
GO TERM: BP	GO:0009628~response to abiotic stimulus	GO:0009628	response to abiotic stimulus	42	8.55397	0.00315072	ENSG00000129521, ENSG00000106688, ENSG00000205220, ENSG00000134013, ENSG00000065534, ENSG00000148180, ENSG00000115255, ENSG00000118898, ENSG00000137463, ENSG00000137261, ENSG00000104081, ENSG00000163624, ENSG00000143153, ENSG00000058668, ENSG00000145730, ENSG00000143595, ENSG00000124253, ENSG00000109610, ENSG00000089163, ENSG00000124212, ENSG00000173991, ENSG00000130427, ENSG00000104419, ENSG0000…	411	1236	19277	1.59378	0.128609
GO TERM: BP	GO:0090066~regulation of anatomical structure size	GO:0090066	regulation of anatomical structure size	23	4.68432	0.0031921	ENSG00000099834, ENSG00000158856, ENSG00000181104, ENSG00000155792, ENSG00000120937, ENSG00000115414, ENSG00000148180, ENSG00000135643, ENSG00000082684, ENSG00000142784, ENSG00000117298, ENSG00000055163, ENSG00000164251, ENSG00000137261, ENSG00000010319, ENSG00000149269, ENSG00000187688, ENSG00000108576, ENSG00000143320, ENSG00000145147, ENSG00000109610, ENSG00000127831, ENSG00000080293	411	544	19277	1.98302	0.129057
GO TERM: BP	GO:0019318~hexose metabolic process	GO:0019318	hexose metabolic process	14	2.85132	0.00321489	ENSG00000156510, ENSG00000219607, ENSG00000111674, ENSG00000112293, ENSG00000142784, ENSG00000142178, ENSG00000166741, ENSG00000166147, ENSG00000089127, ENSG00000110090, ENSG00000095637, ENSG00000179163, ENSG00000124253, ENSG00000165953	411	254	19277	2.58519	0.129057
GO TERM: BP	GO:1903827~regulation of cellular protein localization	GO:1903827	regulation of cellular protein localization	25	5.09165	0.00323044	ENSG00000135506, ENSG00000179841, ENSG00000106688, ENSG00000039068, ENSG00000198743, ENSG00000148180, ENSG00000137642, ENSG00000174827, ENSG00000138496, ENSG00000266094, ENSG00000183098, ENSG00000137261, ENSG00000108187, ENSG00000095637, ENSG00000058668, ENSG00000089163, ENSG00000158856, ENSG00000179399, ENSG00000104537, ENSG00000117228, ENSG00000150551, ENSG00000170558, ENSG00000149269, ENSG0000…	411	614	19277	1.90972	0.129057
GO TERM: BP	GO:0001666~response to hypoxia	GO:0001666	response to hypoxia	18	3.66599	0.00333597	ENSG00000129521, ENSG00000130427, ENSG00000205220, ENSG00000134013, ENSG00000104419, ENSG00000152952, ENSG00000165730, ENSG00000137463, ENSG00000167772, ENSG00000149269, ENSG00000143153, ENSG00000108576, ENSG00000145730, ENSG00000124253, ENSG00000165215, ENSG00000109610, ENSG00000089163, ENSG00000124212	411	380	19277	2.22171	0.132335
GO TERM: BP	GO:2000145~regulation of cell motility	GO:2000145	regulation of cell motility	38	7.73931	0.00349195	ENSG00000161638, ENSG00000181104, ENSG00000064042, ENSG00000137869, ENSG00000112769, ENSG00000173482, ENSG00000107738, ENSG00000039068, ENSG00000181284, ENSG00000065534, ENSG00000115414, ENSG00000137642, ENSG00000118257, ENSG00000184481, ENSG00000006210, ENSG00000138772, ENSG00000128917, ENSG00000164251, ENSG00000108187, ENSG00000162614, ENSG00000058668, ENSG00000158856, ENSG00000105767, ENSG0000…	411	1091	19277	1.63364	0.135351
GO TERM: BP	GO:0098609~cell-cell adhesion	GO:0098609	cell-cell adhesion	35	7.12831	0.00349693	ENSG00000161638, ENSG00000173482, ENSG00000107738, ENSG00000197410, ENSG00000039068, ENSG00000076641, ENSG00000110244, ENSG00000115414, ENSG00000148180, ENSG00000204592, ENSG00000167080, ENSG00000006210, ENSG00000160593, ENSG00000167123, ENSG00000183098, ENSG00000162614, ENSG00000124253, ENSG00000187955, ENSG00000099834, ENSG00000158856, ENSG00000073008, ENSG00000130427, ENSG00000113100, ENSG0000…	411	979	19277	1.67681	0.135351
GO TERM: BP	GO:0051049~regulation of transport	GO:0051049	regulation of transport	59	12.0163	0.00349758	ENSG00000181104, ENSG00000106688, ENSG00000137869, ENSG00000106327, ENSG00000198743, ENSG00000065534, ENSG00000117139, ENSG00000171227, ENSG00000135643, ENSG00000166313, ENSG00000164251, ENSG00000137261, ENSG00000108187, ENSG00000121361, ENSG00000143153, ENSG00000145730, ENSG00000145335, ENSG00000104537, ENSG00000167371, ENSG00000075461, ENSG00000163131, ENSG00000142178, ENSG00000160181, ENSG0000…	411	1910	19277	1.44883	0.135351
GO TERM: BP	GO:0009887~animal organ morphogenesis	GO:0009887	animal organ morphogenesis	39	7.94297	0.00354199	ENSG00000106688, ENSG00000173482, ENSG00000205220, ENSG00000065534, ENSG00000117139, ENSG00000118257, ENSG00000145536, ENSG00000170689, ENSG00000077092, ENSG00000128917, ENSG00000183098, ENSG00000128713, ENSG00000145730, ENSG00000092607, ENSG00000104881, ENSG00000102174, ENSG00000150593, ENSG00000173991, ENSG00000169231, ENSG00000105707, ENSG00000204580, ENSG00000147869, ENSG00000170558, ENSG0000…	411	1129	19277	1.6202	0.135351
GO TERM: BP	GO:1903901~negative regulation of viral life cycle	GO:1903901	negative regulation of viral life cycle	9	1.83299	0.00355619	ENSG00000244509, ENSG00000132109, ENSG00000132703, ENSG00000089127, ENSG00000179750, ENSG00000185201, ENSG00000008517, ENSG00000148180, ENSG00000111331	411	117	19277	3.6079	0.135351
GO TERM: BP	GO:1905039~carboxylic acid transmembrane transport	GO:1905039	carboxylic acid transmembrane transport	9	1.83299	0.00355619	ENSG00000112394, ENSG00000197142, ENSG00000106688, ENSG00000110090, ENSG00000147003, ENSG00000099960, ENSG00000123643, ENSG00000139209, ENSG00000148942	411	117	19277	3.6079	0.135351
GO TERM: MF	GO:0004497~monooxygenase activity	GO:0004497	monooxygenase activity	9	1.83299	0.00359376	ENSG00000137869, ENSG00000076258, ENSG00000010932, ENSG00000138109, ENSG00000196139, ENSG00000145730, ENSG00000131781, ENSG00000138115, ENSG00000124212	381	110	16739	3.59463	0.103558
GO TERM: MF	GO:0032403~protein complex binding	GO:0032403	protein complex binding	30	6.10998	0.00361599	ENSG00000161638, ENSG00000106823, ENSG00000106624, ENSG00000128591, ENSG00000135047, ENSG00000115414, ENSG00000148180, ENSG00000204592, ENSG00000006210, ENSG00000160593, ENSG00000143153, ENSG00000095637, ENSG00000162614, ENSG00000187955, ENSG00000160654, ENSG00000145335, ENSG00000158856, ENSG00000140092, ENSG00000204580, ENSG00000113140, ENSG00000163131, ENSG00000168743, ENSG00000142156, ENSG0000…	381	748	16739	1.76207	0.103558
GO TERM: BP	GO:1901615~organic hydroxy compound metabolic process	GO:1901615	organic hydroxy compound metabolic process	23	4.68432	0.00369698	ENSG00000154265, ENSG00000104324, ENSG00000106688, ENSG00000137869, ENSG00000198743, ENSG00000110244, ENSG00000105707, ENSG00000138109, ENSG00000136881, ENSG00000196139, ENSG00000138115, ENSG00000244474, ENSG00000170775, ENSG00000006534, ENSG00000140284, ENSG00000112394, ENSG00000050165, ENSG00000103316, ENSG00000145321, ENSG00000124253, ENSG00000147852, ENSG00000104044, ENSG00000145335	411	551	19277	1.95782	0.139766
GO TERM: BP	GO:1903825~organic acid transmembrane transport	GO:1903825	organic acid transmembrane transport	9	1.83299	0.0037459	ENSG00000112394, ENSG00000197142, ENSG00000106688, ENSG00000110090, ENSG00000147003, ENSG00000099960, ENSG00000123643, ENSG00000139209, ENSG00000148942	411	118	19277	3.57732	0.140671
GO TERM: BP	GO:0034764~positive regulation of transmembrane transport	GO:0034764	positive regulation of transmembrane transport	12	2.44399	0.00380321	ENSG00000163131, ENSG00000181104, ENSG00000174827, ENSG00000006210, ENSG00000120049, ENSG00000197142, ENSG00000118507, ENSG00000147003, ENSG00000143153, ENSG00000075461, ENSG00000135643, ENSG00000145335	411	200	19277	2.81416	0.141066
GO TERM: BP	GO:0010769~regulation of cell morphogenesis involved in differentiation	GO:0010769	regulation of cell morphogenesis involved in differentiation	16	3.25866	0.00383119	ENSG00000158856, ENSG00000111249, ENSG00000117228, ENSG00000115414, ENSG00000132003, ENSG00000082684, ENSG00000170558, ENSG00000136040, ENSG00000137261, ENSG00000010319, ENSG00000149269, ENSG00000162415, ENSG00000187688, ENSG00000143320, ENSG00000145147, ENSG00000185008	411	321	19277	2.33783	0.141066
GO TERM: BP	GO:0007411~axon guidance	GO:0007411	axon guidance	15	3.05499	0.00384489	ENSG00000107731, ENSG00000173482, ENSG00000074181, ENSG00000118257, ENSG00000082684, ENSG00000136040, ENSG00000117298, ENSG00000143869, ENSG00000010319, ENSG00000162614, ENSG00000145147, ENSG00000185008, ENSG00000125650, ENSG00000147852, ENSG00000074527	411	290	19277	2.426	0.141066
GO TERM: BP	GO:0034754~cellular hormone metabolic process	GO:0034754	cellular hormone metabolic process	10	2.03666	0.00390137	ENSG00000117298, ENSG00000118514, ENSG00000137869, ENSG00000050165, ENSG00000156096, ENSG00000171234, ENSG00000138109, ENSG00000196139, ENSG00000143320, ENSG00000138115	411	145	19277	3.23467	0.141066
GO TERM: BP	GO:0009611~response to wounding	GO:0009611	response to wounding	29	5.90631	0.00395761	ENSG00000161638, ENSG00000181104, ENSG00000104324, ENSG00000173083, ENSG00000106688, ENSG00000149131, ENSG00000110244, ENSG00000065534, ENSG00000115414, ENSG00000119782, ENSG00000148180, ENSG00000006210, ENSG00000118898, ENSG00000123843, ENSG00000160593, ENSG00000164251, ENSG00000137261, ENSG00000099937, ENSG00000158856, ENSG00000132703, ENSG00000105767, ENSG00000130427, ENSG00000204580, ENSG0000…	411	765	19277	1.77801	0.141066
GO TERM: BP	GO:0097485~neuron projection guidance	GO:0097485	neuron projection guidance	15	3.05499	0.00396928	ENSG00000107731, ENSG00000173482, ENSG00000074181, ENSG00000118257, ENSG00000082684, ENSG00000136040, ENSG00000117298, ENSG00000143869, ENSG00000010319, ENSG00000162614, ENSG00000145147, ENSG00000185008, ENSG00000125650, ENSG00000147852, ENSG00000074527	411	291	19277	2.41766	0.141066
GO TERM: BP	GO:0045216~cell-cell junction organization	GO:0045216	cell-cell junction organization	15	3.05499	0.00396928	ENSG00000158856, ENSG00000181104, ENSG00000073008, ENSG00000064042, ENSG00000039068, ENSG00000113100, ENSG00000174469, ENSG00000170558, ENSG00000113361, ENSG00000159261, ENSG00000079112, ENSG00000164251, ENSG00000166341, ENSG00000095637, ENSG00000165215	411	291	19277	2.41766	0.141066
GO TERM: BP	GO:0071772~response to BMP	GO:0071772	response to BMP	11	2.24033	0.00400684	ENSG00000150938, ENSG00000147869, ENSG00000166145, ENSG00000163430, ENSG00000150593, ENSG00000166147, ENSG00000187045, ENSG00000146197, ENSG00000143869, ENSG00000116985, ENSG00000137642	411	173	19277	2.98225	0.141066
GO TERM: BP	GO:0098657~import into cell	GO:0098657	import into cell	11	2.24033	0.00400684	ENSG00000106688, ENSG00000147003, ENSG00000198743, ENSG00000143153, ENSG00000121361, ENSG00000123643, ENSG00000187688, ENSG00000058668, ENSG00000108576, ENSG00000059804, ENSG00000145335	411	173	19277	2.98225	0.141066
GO TERM: BP	GO:0071773~cellular response to BMP stimulus	GO:0071773	cellular response to BMP stimulus	11	2.24033	0.00400684	ENSG00000150938, ENSG00000147869, ENSG00000166145, ENSG00000163430, ENSG00000150593, ENSG00000166147, ENSG00000187045, ENSG00000146197, ENSG00000143869, ENSG00000116985, ENSG00000137642	411	173	19277	2.98225	0.141066
GO TERM: BP	GO:1901698~response to nitrogen compound	GO:1901698	response to nitrogen compound	39	7.94297	0.00409435	ENSG00000105971, ENSG00000106688, ENSG00000039068, ENSG00000109738, ENSG00000170175, ENSG00000148180, ENSG00000137642, ENSG00000142784, ENSG00000184481, ENSG00000137463, ENSG00000157150, ENSG00000121361, ENSG00000095637, ENSG00000058668, ENSG00000124253, ENSG00000145335, ENSG00000180720, ENSG00000158856, ENSG00000102174, ENSG00000106976, ENSG00000075461, ENSG00000150551, ENSG00000156711, ENSG0000…	411	1138	19277	1.60739	0.143252
GO TERM: BP	GO:0001657~ureteric bud development	GO:0001657	ureteric bud development	8	1.62933	0.00415494	ENSG00000145536, ENSG00000147869, ENSG00000168743, ENSG00000077092, ENSG00000166341, ENSG00000128713, ENSG00000145147, ENSG00000185008	411	95	19277	3.9497	0.144474
GO TERM: BP	GO:0070482~response to oxygen levels	GO:0070482	response to oxygen levels	19	3.86965	0.00419263	ENSG00000129521, ENSG00000106688, ENSG00000130427, ENSG00000205220, ENSG00000134013, ENSG00000104419, ENSG00000152952, ENSG00000165730, ENSG00000137463, ENSG00000167772, ENSG00000149269, ENSG00000143153, ENSG00000108576, ENSG00000145730, ENSG00000124253, ENSG00000165215, ENSG00000109610, ENSG00000089163, ENSG00000124212	411	421	19277	2.11675	0.14489
GO TERM: BP	GO:0035295~tube development	GO:0035295	tube development	25	5.09165	0.00431299	ENSG00000117139, ENSG00000145536, ENSG00000117298, ENSG00000077092, ENSG00000128917, ENSG00000128713, ENSG00000102174, ENSG00000173991, ENSG00000170482, ENSG00000204580, ENSG00000147869, ENSG00000113140, ENSG00000168743, ENSG00000166145, ENSG00000165730, ENSG00000143869, ENSG00000166341, ENSG00000149269, ENSG00000121075, ENSG00000106031, ENSG00000164488, ENSG00000145147, ENSG00000106078, ENSG0000…	411	629	19277	1.86418	0.145857
GO TERM: BP	GO:0035740~CD8-positive, alpha-beta T cell proliferation	GO:0035740	CD8-positive, alpha-beta T cell proliferation	3	0.610998	0.00432481	ENSG00000206503, ENSG00000107738, ENSG00000204592	411	5	19277	28.1416	0.145857
GO TERM: BP	GO:0051270~regulation of cellular component movement	GO:0051270	regulation of cellular component movement	40	8.14664	0.00432633	ENSG00000161638, ENSG00000181104, ENSG00000064042, ENSG00000137869, ENSG00000112769, ENSG00000173482, ENSG00000107738, ENSG00000039068, ENSG00000181284, ENSG00000065534, ENSG00000115414, ENSG00000137642, ENSG00000118257, ENSG00000184481, ENSG00000006210, ENSG00000138772, ENSG00000128917, ENSG00000164251, ENSG00000108187, ENSG00000162415, ENSG00000162614, ENSG00000058668, ENSG00000158856, ENSG0000…	411	1181	19277	1.58857	0.145857
GO TERM: BP	GO:0044092~negative regulation of molecular function	GO:0044092	negative regulation of molecular function	42	8.55397	0.00439444	ENSG00000179841, ENSG00000155792, ENSG00000149131, ENSG00000119782, ENSG00000137642, ENSG00000150938, ENSG00000142784, ENSG00000138496, ENSG00000080031, ENSG00000165861, ENSG00000138772, ENSG00000078081, ENSG00000157150, ENSG00000050165, ENSG00000100665, ENSG00000127329, ENSG00000058668, ENSG00000099937, ENSG00000055957, ENSG00000123561, ENSG00000145335, ENSG00000124212, ENSG00000150593, ENSG0000…	411	1258	19277	1.56591	0.145857
GO TERM: BP	GO:0010243~response to organonitrogen compound	GO:0010243	response to organonitrogen compound	35	7.12831	0.00439954	ENSG00000105971, ENSG00000106688, ENSG00000039068, ENSG00000109738, ENSG00000170175, ENSG00000148180, ENSG00000137642, ENSG00000142784, ENSG00000184481, ENSG00000137463, ENSG00000157150, ENSG00000095637, ENSG00000058668, ENSG00000124253, ENSG00000145335, ENSG00000158856, ENSG00000102174, ENSG00000106976, ENSG00000075461, ENSG00000150551, ENSG00000156711, ENSG00000112293, ENSG00000113140, ENSG0000…	411	993	19277	1.65317	0.145857
GO TERM: BP	GO:0072163~mesonephric epithelium development	GO:0072163	mesonephric epithelium development	8	1.62933	0.00440188	ENSG00000145536, ENSG00000147869, ENSG00000168743, ENSG00000077092, ENSG00000166341, ENSG00000128713, ENSG00000145147, ENSG00000185008	411	96	19277	3.90856	0.145857
GO TERM: BP	GO:0072164~mesonephric tubule development	GO:0072164	mesonephric tubule development	8	1.62933	0.00440188	ENSG00000145536, ENSG00000147869, ENSG00000168743, ENSG00000077092, ENSG00000166341, ENSG00000128713, ENSG00000145147, ENSG00000185008	411	96	19277	3.90856	0.145857
GO TERM: BP	GO:0060560~developmental growth involved in morphogenesis	GO:0060560	developmental growth involved in morphogenesis	13	2.64766	0.00448497	ENSG00000115414, ENSG00000117139, ENSG00000204580, ENSG00000118257, ENSG00000082684, ENSG00000055163, ENSG00000137261, ENSG00000010319, ENSG00000149269, ENSG00000187688, ENSG00000143320, ENSG00000145147, ENSG00000106078	411	234	19277	2.6057	0.147742
GO TERM: MF	GO:0043236~laminin binding	GO:0043236	laminin binding	5	1.01833	0.00449186	ENSG00000163131, ENSG00000169499, ENSG00000142910, ENSG00000145147, ENSG00000074527	381	30	16739	7.3224	0.122456
GO TERM: MF	GO:0001948~glycoprotein binding	GO:0001948	glycoprotein binding	6	1.222	0.00451343	ENSG00000163131, ENSG00000173083, ENSG00000135047, ENSG00000144152, ENSG00000115414, ENSG00000145147	381	48	16739	5.4918	0.122456
GO TERM: BP	GO:0043270~positive regulation of ion transport	GO:0043270	positive regulation of ion transport	16	3.25866	0.00453802	ENSG00000181104, ENSG00000197142, ENSG00000075461, ENSG00000065534, ENSG00000135643, ENSG00000163131, ENSG00000174827, ENSG00000006210, ENSG00000120049, ENSG00000118507, ENSG00000147003, ENSG00000143153, ENSG00000187688, ENSG00000100311, ENSG00000108576, ENSG00000145335	411	327	19277	2.29493	0.14862
GO TERM: BP	GO:0010952~positive regulation of peptidase activity	GO:0010952	positive regulation of peptidase activity	12	2.44399	0.00474645	ENSG00000181104, ENSG00000129521, ENSG00000055163, ENSG00000106688, ENSG00000121858, ENSG00000107738, ENSG00000137831, ENSG00000115414, ENSG00000165215, ENSG00000148180, ENSG00000145335, ENSG00000181634	411	206	19277	2.73219	0.154548
GO TERM: CC	GO:0012506~vesicle membrane	GO:0012506	vesicle membrane	32	6.51731	0.00475321	ENSG00000105971, ENSG00000174992, ENSG00000153395, ENSG00000151834, ENSG00000115257, ENSG00000115255, ENSG00000204592, ENSG00000137642, ENSG00000006534, ENSG00000140284, ENSG00000138772, ENSG00000078081, ENSG00000005243, ENSG00000137261, ENSG00000127329, ENSG00000145730, ENSG00000104044, ENSG00000160654, ENSG00000145335, ENSG00000167371, ENSG00000131370, ENSG00000075461, ENSG00000117228, ENSG0000…	396	824	17223	1.68903	0.0841174
GO TERM: BP	GO:0051050~positive regulation of transport	GO:0051050	positive regulation of transport	35	7.12831	0.00482571	ENSG00000179841, ENSG00000181104, ENSG00000154265, ENSG00000137869, ENSG00000106327, ENSG00000039068, ENSG00000065534, ENSG00000135643, ENSG00000137642, ENSG00000174827, ENSG00000166313, ENSG00000006210, ENSG00000164251, ENSG00000137261, ENSG00000143153, ENSG00000095637, ENSG00000145335, ENSG00000197142, ENSG00000106976, ENSG00000104537, ENSG00000167371, ENSG00000075461, ENSG00000120937, ENSG0000…	411	999	19277	1.64324	0.155008
GO TERM: BP	GO:0032880~regulation of protein localization	GO:0032880	regulation of protein localization	34	6.92464	0.00486955	ENSG00000135506, ENSG00000179841, ENSG00000181104, ENSG00000106688, ENSG00000039068, ENSG00000198743, ENSG00000119782, ENSG00000148180, ENSG00000137642, ENSG00000174827, ENSG00000166313, ENSG00000138496, ENSG00000266094, ENSG00000183098, ENSG00000164251, ENSG00000137261, ENSG00000108187, ENSG00000095637, ENSG00000058668, ENSG00000145730, ENSG00000089163, ENSG00000158856, ENSG00000132109, ENSG0000…	411	962	19277	1.65768	0.155008
GO TERM: BP	GO:0034332~adherens junction organization	GO:0034332	adherens junction organization	10	2.03666	0.0048698	ENSG00000158856, ENSG00000170558, ENSG00000113361, ENSG00000073008, ENSG00000064042, ENSG00000079112, ENSG00000166341, ENSG00000039068, ENSG00000095637, ENSG00000113100	411	150	19277	3.12685	0.155008
GO TERM: BP	GO:0045824~negative regulation of innate immune response	GO:0045824	negative regulation of innate immune response	7	1.42566	0.00489519	ENSG00000173193, ENSG00000132109, ENSG00000206503, ENSG00000149131, ENSG00000089127, ENSG00000111331, ENSG00000204592	411	74	19277	4.43674	0.155008
GO TERM: BP	GO:0034329~cell junction assembly	GO:0034329	cell junction assembly	14	2.85132	0.00489819	ENSG00000158856, ENSG00000161638, ENSG00000064042, ENSG00000128591, ENSG00000115414, ENSG00000113100, ENSG00000174469, ENSG00000170558, ENSG00000113361, ENSG00000159261, ENSG00000166341, ENSG00000095637, ENSG00000079308, ENSG00000165215	411	267	19277	2.45932	0.155008
GO TERM: MF	GO:0046873~metal ion transmembrane transporter activity	GO:0046873	metal ion transmembrane transporter activity	20	4.07332	0.00491331	ENSG00000106688, ENSG00000156222, ENSG00000130821, ENSG00000170482, ENSG00000198743, ENSG00000075461, ENSG00000119782, ENSG00000171227, ENSG00000158865, ENSG00000135643, ENSG00000175938, ENSG00000120049, ENSG00000136052, ENSG00000143153, ENSG00000121361, ENSG00000187688, ENSG00000058668, ENSG00000108576, ENSG00000146039, ENSG00000148942	381	433	16739	2.0293	0.122951
GO TERM: MF	GO:0005044~scavenger receptor activity	GO:0005044	scavenger receptor activity	6	1.222	0.00493464	ENSG00000108679, ENSG00000138131, ENSG00000158270, ENSG00000136960, ENSG00000134013, ENSG00000105707	381	49	16739	5.37972	0.122951
GO TERM: MF	GO:0051119~sugar transmembrane transporter activity	GO:0051119	sugar transmembrane transporter activity	5	1.01833	0.00506643	ENSG00000173262, ENSG00000170482, ENSG00000198743, ENSG00000158865, ENSG00000059804	381	31	16739	7.08619	0.122951
GO TERM: BP	GO:0051240~positive regulation of multicellular organismal process	GO:0051240	positive regulation of multicellular organismal process	58	11.8126	0.00507298	ENSG00000181104, ENSG00000173083, ENSG00000106688, ENSG00000197375, ENSG00000107738, ENSG00000117139, ENSG00000204592, ENSG00000166313, ENSG00000164251, ENSG00000132669, ENSG00000105707, ENSG00000172638, ENSG00000168743, ENSG00000186790, ENSG00000186470, ENSG00000167772, ENSG00000143869, ENSG00000123999, ENSG00000182156, ENSG00000164307, ENSG00000187688, ENSG00000121851, ENSG00000106078, ENSG0000…	411	1904	19277	1.42876	0.159643
GO TERM: MF	GO:0042802~identical protein binding	GO:0042802	identical protein binding	68	13.8493	0.00510469	ENSG00000106688, ENSG00000158806, ENSG00000065970, ENSG00000173482, ENSG00000107738, ENSG00000128591, ENSG00000111674, ENSG00000174015, ENSG00000117298, ENSG00000167123, ENSG00000108187, ENSG00000145730, ENSG00000160654, ENSG00000188747, ENSG00000145335, ENSG00000102230, ENSG00000132744, ENSG00000132703, ENSG00000132109, ENSG00000152137, ENSG00000147869, ENSG00000165475, ENSG00000172638, ENSG0000…	381	2171	16739	1.37611	0.122951
GO TERM: MF	GO:0046914~transition metal ion binding	GO:0046914	transition metal ion binding	41	8.35031	0.00512794	ENSG00000129521, ENSG00000244509, ENSG00000072682, ENSG00000106624, ENSG00000137869, ENSG00000110244, ENSG00000134013, ENSG00000117139, ENSG00000138115, ENSG00000138131, ENSG00000140386, ENSG00000117298, ENSG00000077092, ENSG00000165861, ENSG00000161642, ENSG00000162415, ENSG00000145730, ENSG00000124253, ENSG00000109610, ENSG00000072657, ENSG00000089163, ENSG00000145335, ENSG00000124212, ENSG0000…	381	1156	16739	1.55823	0.122951
GO TERM: BP	GO:0014070~response to organic cyclic compound	GO:0014070	response to organic cyclic compound	37	7.53564	0.00534453	ENSG00000106688, ENSG00000137869, ENSG00000039068, ENSG00000111674, ENSG00000110244, ENSG00000170175, ENSG00000119782, ENSG00000148180, ENSG00000012822, ENSG00000137463, ENSG00000138772, ENSG00000147872, ENSG00000121361, ENSG00000058668, ENSG00000145730, ENSG00000124253, ENSG00000145335, ENSG00000158856, ENSG00000102174, ENSG00000130427, ENSG00000075461, ENSG00000265972, ENSG00000196139, ENSG0000…	411	1081	19277	1.60536	0.167254
GO TERM: BP	GO:0006006~glucose metabolic process	GO:0006006	glucose metabolic process	12	2.44399	0.0054634	ENSG00000112293, ENSG00000142784, ENSG00000142178, ENSG00000166741, ENSG00000166147, ENSG00000219607, ENSG00000089127, ENSG00000110090, ENSG00000111674, ENSG00000095637, ENSG00000124253, ENSG00000165953	411	210	19277	2.68015	0.170029
GO TERM: BP	GO:0016485~protein processing	GO:0016485	protein processing	18	3.66599	0.00558328	ENSG00000102174, ENSG00000149131, ENSG00000107738, ENSG00000135047, ENSG00000105707, ENSG00000115257, ENSG00000148180, ENSG00000177669, ENSG00000021852, ENSG00000163131, ENSG00000117298, ENSG00000139178, ENSG00000138496, ENSG00000055163, ENSG00000123843, ENSG00000135074, ENSG00000128965, ENSG00000089163	411	400	19277	2.11062	0.172806
GO TERM: BP	GO:0006814~sodium ion transport	GO:0006814	sodium ion transport	13	2.64766	0.00566187	ENSG00000130821, ENSG00000197375, ENSG00000170482, ENSG00000198743, ENSG00000139209, ENSG00000114796, ENSG00000158865, ENSG00000102316, ENSG00000143153, ENSG00000058668, ENSG00000108576, ENSG00000146039, ENSG00000148942	411	241	19277	2.53002	0.173522
GO TERM: BP	GO:0048585~negative regulation of response to stimulus	GO:0048585	negative regulation of response to stimulus	61	12.4236	0.00566804	ENSG00000107731, ENSG00000137869, ENSG00000149131, ENSG00000204592, ENSG00000170775, ENSG00000128917, ENSG00000164251, ENSG00000137261, ENSG00000108187, ENSG00000050165, ENSG00000080293, ENSG00000160654, ENSG00000145335, ENSG00000150593, ENSG00000132703, ENSG00000132109, ENSG00000130768, ENSG00000137831, ENSG00000147869, ENSG00000121858, ENSG00000187045, ENSG00000120129, ENSG00000161031, ENSG0000…	411	2035	19277	1.40593	0.173522
GO TERM: MF	GO:0001968~fibronectin binding	GO:0001968	fibronectin binding	5	1.01833	0.00568825	ENSG00000163131, ENSG00000169499, ENSG00000135047, ENSG00000091986, ENSG00000167779	381	32	16739	6.86475	0.133286
GO TERM: CC	GO:0031253~cell projection membrane	GO:0031253	cell projection membrane	18	3.66599	0.00570234	ENSG00000099834, ENSG00000179841, ENSG00000158856, ENSG00000161638, ENSG00000155850, ENSG00000156222, ENSG00000197375, ENSG00000138823, ENSG00000151834, ENSG00000174469, ENSG00000167434, ENSG00000174827, ENSG00000080031, ENSG00000122507, ENSG00000149269, ENSG00000185008, ENSG00000168778, ENSG00000107201	396	372	17223	2.10447	0.0979461
GO TERM: BP	GO:1904064~positive regulation of cation transmembrane transport	GO:1904064	positive regulation of cation transmembrane transport	11	2.24033	0.00570771	ENSG00000163131, ENSG00000181104, ENSG00000174827, ENSG00000006210, ENSG00000120049, ENSG00000118507, ENSG00000147003, ENSG00000143153, ENSG00000075461, ENSG00000135643, ENSG00000145335	411	182	19277	2.83478	0.173792
GO TERM: BP	GO:0048754~branching morphogenesis of an epithelial tube	GO:0048754	branching morphogenesis of an epithelial tube	10	2.03666	0.00577117	ENSG00000145536, ENSG00000168743, ENSG00000128917, ENSG00000143869, ENSG00000166341, ENSG00000149269, ENSG00000128713, ENSG00000145147, ENSG00000117139, ENSG00000204580	411	154	19277	3.04563	0.174322
GO TERM: BP	GO:0001823~mesonephros development	GO:0001823	mesonephros development	8	1.62933	0.00580647	ENSG00000145536, ENSG00000147869, ENSG00000168743, ENSG00000077092, ENSG00000166341, ENSG00000128713, ENSG00000145147, ENSG00000185008	411	101	19277	3.71506	0.174322
GO TERM: BP	GO:0045785~positive regulation of cell adhesion	GO:0045785	positive regulation of cell adhesion	20	4.07332	0.00581796	ENSG00000158856, ENSG00000161638, ENSG00000106823, ENSG00000132669, ENSG00000130427, ENSG00000107738, ENSG00000181284, ENSG00000115414, ENSG00000204592, ENSG00000172638, ENSG00000168743, ENSG00000006210, ENSG00000008256, ENSG00000169499, ENSG00000206503, ENSG00000135074, ENSG00000149269, ENSG00000100311, ENSG00000091986, ENSG00000124253	411	469	19277	2.00011	0.174322
GO TERM: BP	GO:0070848~response to growth factor	GO:0070848	response to growth factor	29	5.90631	0.00587411	ENSG00000105971, ENSG00000161638, ENSG00000117139, ENSG00000116985, ENSG00000137642, ENSG00000118257, ENSG00000150938, ENSG00000138772, ENSG00000128917, ENSG00000108187, ENSG00000050165, ENSG00000058668, ENSG00000104880, ENSG00000145335, ENSG00000150593, ENSG00000105767, ENSG00000146197, ENSG00000147869, ENSG00000168743, ENSG00000166145, ENSG00000163430, ENSG00000166147, ENSG00000055163, ENSG0000…	411	789	19277	1.72393	0.175073
GO TERM: BP	GO:0051701~interaction with host	GO:0051701	interaction with host	13	2.64766	0.00603674	ENSG00000105971, ENSG00000161638, ENSG00000073008, ENSG00000132703, ENSG00000132109, ENSG00000174992, ENSG00000039068, ENSG00000135047, ENSG00000113249, ENSG00000148180, ENSG00000161031, ENSG00000166825, ENSG00000185201	411	243	19277	2.5092	0.178973
GO TERM: MF	GO:0030246~carbohydrate binding	GO:0030246	carbohydrate binding	15	3.05499	0.00609697	ENSG00000135506, ENSG00000129521, ENSG00000156510, ENSG00000219607, ENSG00000132703, ENSG00000174992, ENSG00000072682, ENSG00000136960, ENSG00000134013, ENSG00000006659, ENSG00000152952, ENSG00000158270, ENSG00000127329, ENSG00000145730, ENSG00000059804	381	287	16739	2.29622	0.139688
GO TERM: BP	GO:0008202~steroid metabolic process	GO:0008202	steroid metabolic process	16	3.25866	0.00614596	ENSG00000154265, ENSG00000137869, ENSG00000110244, ENSG00000171234, ENSG00000138109, ENSG00000136881, ENSG00000196139, ENSG00000131781, ENSG00000138115, ENSG00000244474, ENSG00000140284, ENSG00000050165, ENSG00000156096, ENSG00000145321, ENSG00000147852, ENSG00000165953	411	338	19277	2.22025	0.181258
GO TERM: BP	GO:0006801~superoxide metabolic process	GO:0006801	superoxide metabolic process	7	1.42566	0.00632479	ENSG00000106688, ENSG00000164251, ENSG00000110244, ENSG00000140092, ENSG00000116701, ENSG00000109610, ENSG00000188747	411	78	19277	4.20921	0.18556
GO TERM: BP	GO:1901700~response to oxygen-containing compound	GO:1901700	response to oxygen-containing compound	55	11.2016	0.00646475	ENSG00000181104, ENSG00000106688, ENSG00000137869, ENSG00000111674, ENSG00000170775, ENSG00000142784, ENSG00000137463, ENSG00000157150, ENSG00000121361, ENSG00000124875, ENSG00000145730, ENSG00000145335, ENSG00000150593, ENSG00000075461, ENSG00000265972, ENSG00000150551, ENSG00000158270, ENSG00000121858, ENSG00000120129, ENSG00000110090, ENSG00000106031, ENSG00000108576, ENSG00000165953, ENSG0000…	411	1805	19277	1.42917	0.188684
GO TERM: BP	GO:0023056~positive regulation of signaling	GO:0023056	positive regulation of signaling	59	12.0163	0.00652648	ENSG00000107731, ENSG00000181104, ENSG00000173083, ENSG00000106688, ENSG00000106327, ENSG00000150281, ENSG00000170775, ENSG00000117298, ENSG00000128917, ENSG00000164251, ENSG00000137261, ENSG00000080293, ENSG00000145335, ENSG00000150593, ENSG00000132109, ENSG00000179399, ENSG00000167371, ENSG00000075461, ENSG00000168743, ENSG00000121858, ENSG00000143869, ENSG00000123999, ENSG00000167779, ENSG0000…	411	1966	19277	1.40756	0.189503
GO TERM: MF	GO:0048029~monosaccharide binding	GO:0048029	monosaccharide binding	7	1.42566	0.00666112	ENSG00000129521, ENSG00000156510, ENSG00000158270, ENSG00000072682, ENSG00000145730, ENSG00000152952, ENSG00000059804	381	74	16739	4.15596	0.149296
GO TERM: BP	GO:0071363~cellular response to growth factor stimulus	GO:0071363	cellular response to growth factor stimulus	28	5.70265	0.00670567	ENSG00000105971, ENSG00000161638, ENSG00000117139, ENSG00000116985, ENSG00000137642, ENSG00000118257, ENSG00000150938, ENSG00000128917, ENSG00000108187, ENSG00000050165, ENSG00000058668, ENSG00000104880, ENSG00000145335, ENSG00000150593, ENSG00000105767, ENSG00000146197, ENSG00000147869, ENSG00000168743, ENSG00000166145, ENSG00000163430, ENSG00000166147, ENSG00000055163, ENSG00000143869, ENSG0000…	411	760	19277	1.72799	0.193708
GO TERM: BP	GO:0048729~tissue morphogenesis	GO:0048729	tissue morphogenesis	26	5.29532	0.00676319	ENSG00000161638, ENSG00000205220, ENSG00000065534, ENSG00000117139, ENSG00000118257, ENSG00000145536, ENSG00000128917, ENSG00000183098, ENSG00000128713, ENSG00000173991, ENSG00000204580, ENSG00000172638, ENSG00000168743, ENSG00000166145, ENSG00000175707, ENSG00000164683, ENSG00000165730, ENSG00000143869, ENSG00000166341, ENSG00000149269, ENSG00000121075, ENSG00000106031, ENSG00000145147, ENSG0000…	411	688	19277	1.77248	0.194373
GO TERM: BP	GO:1901342~regulation of vasculature development	GO:1901342	regulation of vasculature development	19	3.86965	0.00696123	ENSG00000161638, ENSG00000150593, ENSG00000132669, ENSG00000065970, ENSG00000173482, ENSG00000136960, ENSG00000120937, ENSG00000113140, ENSG00000172638, ENSG00000164683, ENSG00000006210, ENSG00000184481, ENSG00000138772, ENSG00000128917, ENSG00000167772, ENSG00000164307, ENSG00000100311, ENSG00000058668, ENSG00000124212	411	444	19277	2.0071	0.199049
GO TERM: BP	GO:0045595~regulation of cell differentiation	GO:0045595	regulation of cell differentiation	60	12.22	0.00700007	ENSG00000107738, ENSG00000135047, ENSG00000166313, ENSG00000128917, ENSG00000137261, ENSG00000108187, ENSG00000150593, ENSG00000132703, ENSG00000132669, ENSG00000105707, ENSG00000172638, ENSG00000168743, ENSG00000186790, ENSG00000142178, ENSG00000175707, ENSG00000143869, ENSG00000123999, ENSG00000161031, ENSG00000010319, ENSG00000187688, ENSG00000108576, ENSG00000165556, ENSG00000106078, ENSG0000…	411	2016	19277	1.39591	0.199148
GO TERM: BP	GO:0030182~neuron differentiation	GO:0030182	neuron differentiation	46	9.36864	0.00711976	ENSG00000107731, ENSG00000173482, ENSG00000150281, ENSG00000039068, ENSG00000204099, ENSG00000110244, ENSG00000115414, ENSG00000119782, ENSG00000189195, ENSG00000074181, ENSG00000170775, ENSG00000118257, ENSG00000166313, ENSG00000117298, ENSG00000006210, ENSG00000128917, ENSG00000137261, ENSG00000162415, ENSG00000162614, ENSG00000147852, ENSG00000111249, ENSG00000130427, ENSG00000153902, ENSG0000…	411	1453	19277	1.48487	0.200345
GO TERM: BP	GO:0061041~regulation of wound healing	GO:0061041	regulation of wound healing	11	2.24033	0.00712619	ENSG00000158856, ENSG00000181104, ENSG00000173083, ENSG00000132703, ENSG00000105767, ENSG00000164251, ENSG00000149131, ENSG00000065534, ENSG00000100311, ENSG00000165215, ENSG00000127831	411	188	19277	2.74431	0.200345
GO TERM: BP	GO:0019885~antigen processing and presentation of endogenous peptide antigen via MHC class I	GO:0019885	antigen processing and presentation of endogenous peptide antigen via MHC class I	4	0.814664	0.00718441	ENSG00000231925, ENSG00000206503, ENSG00000164307, ENSG00000204592	411	19	19277	9.87425	0.200345
GO TERM: BP	GO:0060004~reflex	GO:0060004	reflex	4	0.814664	0.00718441	ENSG00000168743, ENSG00000106688, ENSG00000109738, ENSG00000105707	411	19	19277	9.87425	0.200345
GO TERM: MF	GO:0004499~N,N-dimethylaniline monooxygenase activity	GO:0004499	N,N-dimethylaniline monooxygenase activity	3	0.610998	0.00725773	ENSG00000076258, ENSG00000010932, ENSG00000131781	381	6	16739	21.9672	0.157082
GO TERM: BP	GO:0034220~ion transmembrane transport	GO:0034220	ion transmembrane transport	39	7.94297	0.00729934	ENSG00000181104, ENSG00000155850, ENSG00000106688, ENSG00000197375, ENSG00000109738, ENSG00000170175, ENSG00000099960, ENSG00000151834, ENSG00000119782, ENSG00000139209, ENSG00000171227, ENSG00000135643, ENSG00000175938, ENSG00000174827, ENSG00000006210, ENSG00000136052, ENSG00000123643, ENSG00000143153, ENSG00000121361, ENSG00000058668, ENSG00000148942, ENSG00000145335, ENSG00000197142, ENSG0000…	411	1181	19277	1.54886	0.202548
GO TERM: MF	GO:0015081~sodium ion transmembrane transporter activity	GO:0015081	sodium ion transmembrane transporter activity	10	2.03666	0.00732144	ENSG00000106688, ENSG00000156222, ENSG00000130821, ENSG00000170482, ENSG00000198743, ENSG00000143153, ENSG00000108576, ENSG00000158865, ENSG00000146039, ENSG00000148942	381	150	16739	2.92896	0.157082
GO TERM: CC	GO:0005593~FACIT collagen trimer	GO:0005593	FACIT collagen trimer	3	0.610998	0.00740348	ENSG00000111799, ENSG00000049089, ENSG00000187955	396	6	17223	21.7462	0.120999
GO TERM: BP	GO:0051346~negative regulation of hydrolase activity	GO:0051346	negative regulation of hydrolase activity	19	3.86965	0.00741196	ENSG00000132703, ENSG00000149131, ENSG00000119782, ENSG00000137642, ENSG00000150938, ENSG00000166145, ENSG00000165861, ENSG00000078081, ENSG00000157150, ENSG00000167772, ENSG00000100665, ENSG00000099937, ENSG00000055957, ENSG00000127831, ENSG00000123561, ENSG00000186910, ENSG00000124102, ENSG00000165953, ENSG00000145335	411	446	19277	1.9981	0.204665
GO TERM: CC	GO:0070161~anchoring junction	GO:0070161	anchoring junction	24	4.88798	0.00745881	ENSG00000105971, ENSG00000161638, ENSG00000073008, ENSG00000173482, ENSG00000039068, ENSG00000128591, ENSG00000104419, ENSG00000116117, ENSG00000113100, ENSG00000114796, ENSG00000148180, ENSG00000170558, ENSG00000113361, ENSG00000065717, ENSG00000118898, ENSG00000008256, ENSG00000166341, ENSG00000144152, ENSG00000149269, ENSG00000162614, ENSG00000095637, ENSG00000108576, ENSG00000079308, ENSG0000…	396	577	17223	1.80904	0.120999
GO TERM: BP	GO:0016477~cell migration	GO:0016477	cell migration	51	10.387	0.0074643	ENSG00000181104, ENSG00000064042, ENSG00000137869, ENSG00000173482, ENSG00000107738, ENSG00000065534, ENSG00000170689, ENSG00000128917, ENSG00000183098, ENSG00000164251, ENSG00000137261, ENSG00000108187, ENSG00000143153, ENSG00000124875, ENSG00000079308, ENSG00000132669, ENSG00000179399, ENSG00000114019, ENSG00000204580, ENSG00000147869, ENSG00000120129, ENSG00000010319, ENSG00000167779, ENSG0000…	411	1658	19277	1.44272	0.205104
GO TERM: MF	GO:1901618~organic hydroxy compound transmembrane transporter activity	GO:1901618	organic hydroxy compound transmembrane transporter activity	6	1.222	0.00746558	ENSG00000134538, ENSG00000198743, ENSG00000143595, ENSG00000108576, ENSG00000158865, ENSG00000148942	381	54	16739	4.8816	0.157082
GO TERM: BP	GO:0060840~artery development	GO:0060840	artery development	8	1.62933	0.00752186	ENSG00000172638, ENSG00000164683, ENSG00000128917, ENSG00000065534, ENSG00000106031, ENSG00000185008, ENSG00000074181, ENSG00000049192	411	106	19277	3.53982	0.205683
GO TERM: BP	GO:0030509~BMP signaling pathway	GO:0030509	BMP signaling pathway	10	2.03666	0.00765247	ENSG00000150938, ENSG00000147869, ENSG00000163430, ENSG00000150593, ENSG00000166147, ENSG00000187045, ENSG00000146197, ENSG00000143869, ENSG00000116985, ENSG00000137642	411	161	19277	2.91321	0.208243
GO TERM: MF	GO:0005198~structural molecule activity	GO:0005198	structural molecule activity	30	6.10998	0.0078216	ENSG00000111799, ENSG00000106624, ENSG00000112769, ENSG00000138315, ENSG00000115414, ENSG00000061656, ENSG00000118898, ENSG00000049089, ENSG00000163703, ENSG00000095637, ENSG00000162614, ENSG00000187955, ENSG00000160654, ENSG00000173991, ENSG00000169231, ENSG00000173213, ENSG00000140092, ENSG00000132561, ENSG00000113140, ENSG00000172638, ENSG00000168743, ENSG00000142156, ENSG00000159261, ENSG0000…	381	790	16739	1.66839	0.161281
GO TERM: BP	GO:0044712~single-organism catabolic process	GO:0044712	single-organism catabolic process	36	7.33198	0.00784853	ENSG00000135506, ENSG00000134538, ENSG00000244509, ENSG00000173083, ENSG00000137869, ENSG00000204099, ENSG00000135047, ENSG00000111674, ENSG00000110244, ENSG00000137642, ENSG00000006534, ENSG00000140284, ENSG00000118514, ENSG00000008311, ENSG00000103316, ENSG00000179163, ENSG00000058668, ENSG00000124253, ENSG00000103066, ENSG00000156510, ENSG00000130768, ENSG00000171174, ENSG00000179750, ENSG0000…	411	1071	19277	1.57656	0.211636
GO TERM: BP	GO:0031344~regulation of cell projection organization	GO:0031344	regulation of cell projection organization	27	5.49898	0.00785228	ENSG00000204099, ENSG00000115414, ENSG00000119782, ENSG00000145536, ENSG00000166313, ENSG00000006210, ENSG00000164251, ENSG00000137261, ENSG00000162415, ENSG00000147852, ENSG00000099834, ENSG00000158856, ENSG00000111249, ENSG00000130427, ENSG00000136960, ENSG00000132003, ENSG00000082684, ENSG00000170558, ENSG00000136040, ENSG00000010319, ENSG00000149269, ENSG00000187688, ENSG00000145147, ENSG0000…	411	733	19277	1.72766	0.211636
GO TERM: BP	GO:0006643~membrane lipid metabolic process	GO:0006643	membrane lipid metabolic process	12	2.44399	0.00818356	ENSG00000112293, ENSG00000103066, ENSG00000128242, ENSG00000060642, ENSG00000130768, ENSG00000115525, ENSG00000204099, ENSG00000136960, ENSG00000182156, ENSG00000179163, ENSG00000168528, ENSG00000006534	411	222	19277	2.53528	0.219514
GO TERM: BP	GO:0052695~cellular glucuronidation	GO:0052695	cellular glucuronidation	4	0.814664	0.00832065	ENSG00000156096, ENSG00000171234, ENSG00000135220, ENSG00000244474	411	20	19277	9.38054	0.222134
GO TERM: BP	GO:0046466~membrane lipid catabolic process	GO:0046466	membrane lipid catabolic process	5	1.01833	0.00841096	ENSG00000130768, ENSG00000204099, ENSG00000136960, ENSG00000182156, ENSG00000179163	411	38	19277	6.1714	0.223123
GO TERM: BP	GO:1901605~alpha-amino acid metabolic process	GO:1901605	alpha-amino acid metabolic process	13	2.64766	0.00843693	ENSG00000129521, ENSG00000130821, ENSG00000072682, ENSG00000136881, ENSG00000152952, ENSG00000119711, ENSG00000086205, ENSG00000118514, ENSG00000008311, ENSG00000166165, ENSG00000103316, ENSG00000058668, ENSG00000089163	411	254	19277	2.40053	0.223123
GO TERM: BP	GO:0044262~cellular carbohydrate metabolic process	GO:0044262	cellular carbohydrate metabolic process	15	3.05499	0.00847735	ENSG00000156510, ENSG00000219607, ENSG00000171174, ENSG00000198743, ENSG00000044446, ENSG00000156966, ENSG00000244474, ENSG00000112293, ENSG00000142178, ENSG00000166741, ENSG00000237172, ENSG00000095637, ENSG00000124253, ENSG00000165953, ENSG00000145335	411	318	19277	2.21239	0.223144
GO TERM: CC	GO:0043296~apical junction complex	GO:0043296	apical junction complex	10	2.03666	0.00848681	ENSG00000159261, ENSG00000008256, ENSG00000160593, ENSG00000039068, ENSG00000114019, ENSG00000171992, ENSG00000095637, ENSG00000116117, ENSG00000165215, ENSG00000107201	396	152	17223	2.86134	0.133954
GO TERM: BP	GO:0098739~import across plasma membrane	GO:0098739	import across plasma membrane	9	1.83299	0.00868779	ENSG00000106688, ENSG00000147003, ENSG00000198743, ENSG00000143153, ENSG00000121361, ENSG00000123643, ENSG00000187688, ENSG00000058668, ENSG00000059804	411	136	19277	3.10385	0.226255
GO TERM: BP	GO:0006639~acylglycerol metabolic process	GO:0006639	acylglycerol metabolic process	9	1.83299	0.00868779	ENSG00000112293, ENSG00000103066, ENSG00000142178, ENSG00000110090, ENSG00000163898, ENSG00000110244, ENSG00000138823, ENSG00000124253, ENSG00000137642	411	136	19277	3.10385	0.226255
GO TERM: BP	GO:0006641~triglyceride metabolic process	GO:0006641	triglyceride metabolic process	8	1.62933	0.00871603	ENSG00000112293, ENSG00000142178, ENSG00000110090, ENSG00000163898, ENSG00000110244, ENSG00000138823, ENSG00000124253, ENSG00000137642	411	109	19277	3.4424	0.226255
GO TERM: BP	GO:0035904~aorta development	GO:0035904	aorta development	6	1.222	0.00889953	ENSG00000172638, ENSG00000164683, ENSG00000128917, ENSG00000065534, ENSG00000185008, ENSG00000049192	411	60	19277	4.69027	0.229134
GO TERM: BP	GO:0010647~positive regulation of cell communication	GO:0010647	positive regulation of cell communication	58	11.8126	0.00890828	ENSG00000107731, ENSG00000181104, ENSG00000173083, ENSG00000106688, ENSG00000106327, ENSG00000150281, ENSG00000170775, ENSG00000128917, ENSG00000164251, ENSG00000137261, ENSG00000080293, ENSG00000145335, ENSG00000150593, ENSG00000132109, ENSG00000179399, ENSG00000167371, ENSG00000075461, ENSG00000168743, ENSG00000121858, ENSG00000143869, ENSG00000123999, ENSG00000167779, ENSG00000165953, ENSG0000…	411	1959	19277	1.38864	0.229134
GO TERM: BP	GO:0003279~cardiac septum development	GO:0003279	cardiac septum development	8	1.62933	0.00914338	ENSG00000164683, ENSG00000077092, ENSG00000106031, ENSG00000163703, ENSG00000145147, ENSG00000185008, ENSG00000049192, ENSG00000118257	411	110	19277	3.4111	0.234112
GO TERM: BP	GO:0008210~estrogen metabolic process	GO:0008210	estrogen metabolic process	5	1.01833	0.00921812	ENSG00000137869, ENSG00000156096, ENSG00000171234, ENSG00000138109, ENSG00000138115	411	39	19277	6.01316	0.234958
GO TERM: BP	GO:0030277~maintenance of gastrointestinal epithelium	GO:0030277	maintenance of gastrointestinal epithelium	4	0.814664	0.00955647	ENSG00000160181, ENSG00000197375, ENSG00000108187, ENSG00000173702	411	21	19277	8.93384	0.241397
GO TERM: BP	GO:0002483~antigen processing and presentation of endogenous peptide antigen	GO:0002483	antigen processing and presentation of endogenous peptide antigen	4	0.814664	0.00955647	ENSG00000231925, ENSG00000206503, ENSG00000164307, ENSG00000204592	411	21	19277	8.93384	0.241397
GO TERM: BP	GO:1990138~neuron projection extension	GO:1990138	neuron projection extension	10	2.03666	0.00960943	ENSG00000082684, ENSG00000055163, ENSG00000137261, ENSG00000010319, ENSG00000149269, ENSG00000187688, ENSG00000115414, ENSG00000145147, ENSG00000118257, ENSG00000204580	411	167	19277	2.80854	0.241651
GO TERM: CC	GO:0031252~cell leading edge	GO:0031252	cell leading edge	19	3.86965	0.00969803	ENSG00000179841, ENSG00000161638, ENSG00000127084, ENSG00000105767, ENSG00000173482, ENSG00000039068, ENSG00000151834, ENSG00000065534, ENSG00000148180, ENSG00000174469, ENSG00000170558, ENSG00000175707, ENSG00000166313, ENSG00000008256, ENSG00000149269, ENSG00000106078, ENSG00000185008, ENSG00000127831, ENSG00000107201	396	426	17223	1.9398	0.149043
GO TERM: BP	GO:0032787~monocarboxylic acid metabolic process	GO:0032787	monocarboxylic acid metabolic process	25	5.09165	0.0101005	ENSG00000111674, ENSG00000110244, ENSG00000135220, ENSG00000138115, ENSG00000142784, ENSG00000140284, ENSG00000118514, ENSG00000145730, ENSG00000124253, ENSG00000089163, ENSG00000145335, ENSG00000124212, ENSG00000103066, ENSG00000156510, ENSG00000197142, ENSG00000171234, ENSG00000138109, ENSG00000136881, ENSG00000196139, ENSG00000244474, ENSG00000165475, ENSG00000110090, ENSG00000163898, ENSG0000…	411	675	19277	1.73714	0.252871
GO TERM: BP	GO:0090288~negative regulation of cellular response to growth factor stimulus	GO:0090288	negative regulation of cellular response to growth factor stimulus	11	2.24033	0.0104395	ENSG00000150938, ENSG00000147869, ENSG00000105971, ENSG00000163430, ENSG00000166147, ENSG00000105767, ENSG00000187045, ENSG00000108187, ENSG00000058668, ENSG00000145147, ENSG00000137642	411	199	19277	2.59261	0.258835
GO TERM: BP	GO:0034097~response to cytokine	GO:0034097	response to cytokine	41	8.35031	0.0104396	ENSG00000106688, ENSG00000150281, ENSG00000181284, ENSG00000205220, ENSG00000008517, ENSG00000115414, ENSG00000117139, ENSG00000148180, ENSG00000111331, ENSG00000204592, ENSG00000118257, ENSG00000138496, ENSG00000006210, ENSG00000078081, ENSG00000157150, ENSG00000089127, ENSG00000164251, ENSG00000124875, ENSG00000124253, ENSG00000145335, ENSG00000124212, ENSG00000181634, ENSG00000173193, ENSG0000…	411	1288	19277	1.49302	0.258835
GO TERM: BP	GO:0048675~axon extension	GO:0048675	axon extension	8	1.62933	0.0105176	ENSG00000082684, ENSG00000137261, ENSG00000010319, ENSG00000149269, ENSG00000187688, ENSG00000115414, ENSG00000145147, ENSG00000118257	411	113	19277	3.32054	0.258835
GO TERM: BP	GO:0010975~regulation of neuron projection development	GO:0010975	regulation of neuron projection development	21	4.27699	0.0105568	ENSG00000111249, ENSG00000130427, ENSG00000204099, ENSG00000119782, ENSG00000115414, ENSG00000132003, ENSG00000082684, ENSG00000170558, ENSG00000136040, ENSG00000166313, ENSG00000006210, ENSG00000137261, ENSG00000010319, ENSG00000149269, ENSG00000162415, ENSG00000187688, ENSG00000143320, ENSG00000145147, ENSG00000106078, ENSG00000185008, ENSG00000147852	411	533	19277	1.84795	0.258835
GO TERM: CC	GO:0005912~adherens junction	GO:0005912	adherens junction	23	4.68432	0.0105604	ENSG00000105971, ENSG00000161638, ENSG00000073008, ENSG00000173482, ENSG00000039068, ENSG00000128591, ENSG00000104419, ENSG00000116117, ENSG00000113100, ENSG00000114796, ENSG00000148180, ENSG00000170558, ENSG00000113361, ENSG00000065717, ENSG00000008256, ENSG00000166341, ENSG00000144152, ENSG00000149269, ENSG00000162614, ENSG00000095637, ENSG00000108576, ENSG00000079308, ENSG00000168955	396	561	17223	1.78311	0.155195
GO TERM: BP	GO:0060485~mesenchyme development	GO:0060485	mesenchyme development	14	2.85132	0.0106096	ENSG00000150593, ENSG00000134013, ENSG00000105707, ENSG00000115414, ENSG00000118257, ENSG00000082684, ENSG00000147869, ENSG00000170558, ENSG00000164683, ENSG00000166341, ENSG00000108187, ENSG00000010319, ENSG00000163703, ENSG00000185008	411	294	19277	2.23346	0.258835
GO TERM: BP	GO:0050772~positive regulation of axonogenesis	GO:0050772	positive regulation of axonogenesis	7	1.42566	0.0106144	ENSG00000136040, ENSG00000149269, ENSG00000187688, ENSG00000115414, ENSG00000143320, ENSG00000145147, ENSG00000185008	411	87	19277	3.77378	0.258835
GO TERM: CC	GO:0030659~cytoplasmic vesicle membrane	GO:0030659	cytoplasmic vesicle membrane	30	6.10998	0.0106298	ENSG00000105971, ENSG00000174992, ENSG00000153395, ENSG00000151834, ENSG00000115257, ENSG00000115255, ENSG00000204592, ENSG00000137642, ENSG00000006534, ENSG00000140284, ENSG00000138772, ENSG00000078081, ENSG00000005243, ENSG00000137261, ENSG00000127329, ENSG00000145730, ENSG00000104044, ENSG00000160654, ENSG00000145335, ENSG00000167371, ENSG00000131370, ENSG00000075461, ENSG00000113140, ENSG0000…	396	802	17223	1.6269	0.155195
GO TERM: MF	GO:0050840~extracellular matrix binding	GO:0050840	extracellular matrix binding	6	1.222	0.010784	ENSG00000163131, ENSG00000113140, ENSG00000169499, ENSG00000142910, ENSG00000145147, ENSG00000074527	381	59	16739	4.4679	0.216756
GO TERM: BP	GO:0046903~secretion	GO:0046903	secretion	47	9.5723	0.010929	ENSG00000181104, ENSG00000173083, ENSG00000153395, ENSG00000137869, ENSG00000106327, ENSG00000149131, ENSG00000115414, ENSG00000119782, ENSG00000117139, ENSG00000148180, ENSG00000135643, ENSG00000137642, ENSG00000006534, ENSG00000166313, ENSG00000140284, ENSG00000138772, ENSG00000164251, ENSG00000100665, ENSG00000127329, ENSG00000179163, ENSG00000145730, ENSG00000089163, ENSG00000145335, ENSG0000…	411	1530	19277	1.4408	0.264975
GO TERM: MF	GO:0008324~cation transmembrane transporter activity	GO:0008324	cation transmembrane transporter activity	26	5.29532	0.0109324	ENSG00000106688, ENSG00000156222, ENSG00000197375, ENSG00000198743, ENSG00000170175, ENSG00000107819, ENSG00000119782, ENSG00000171227, ENSG00000158865, ENSG00000135643, ENSG00000175938, ENSG00000136052, ENSG00000123643, ENSG00000143153, ENSG00000121361, ENSG00000058668, ENSG00000104044, ENSG00000143036, ENSG00000148942, ENSG00000130821, ENSG00000170482, ENSG00000075461, ENSG00000120049, ENSG0000…	381	672	16739	1.69984	0.216756
GO TERM: BP	GO:0071526~semaphorin-plexin signaling pathway	GO:0071526	semaphorin-plexin signaling pathway	5	1.01833	0.0109799	ENSG00000082684, ENSG00000136040, ENSG00000117298, ENSG00000010319, ENSG00000118257	411	41	19277	5.71984	0.264975
GO TERM: BP	GO:0018958~phenol-containing compound metabolic process	GO:0018958	phenol-containing compound metabolic process	8	1.62933	0.0110073	ENSG00000112394, ENSG00000104324, ENSG00000106688, ENSG00000103316, ENSG00000105707, ENSG00000104044, ENSG00000170775, ENSG00000145335	411	114	19277	3.29142	0.264975
GO TERM: BP	GO:1903900~regulation of viral life cycle	GO:1903900	regulation of viral life cycle	12	2.44399	0.0111546	ENSG00000105971, ENSG00000244509, ENSG00000132109, ENSG00000078081, ENSG00000132703, ENSG00000089127, ENSG00000179750, ENSG00000185201, ENSG00000105707, ENSG00000008517, ENSG00000148180, ENSG00000111331	411	232	19277	2.426	0.267378
GO TERM: BP	GO:0051674~localization of cell	GO:0051674	localization of cell	56	11.4053	0.0113089	ENSG00000181104, ENSG00000064042, ENSG00000137869, ENSG00000173482, ENSG00000112769, ENSG00000107738, ENSG00000065534, ENSG00000170689, ENSG00000128917, ENSG00000183098, ENSG00000164251, ENSG00000137261, ENSG00000108187, ENSG00000143153, ENSG00000124875, ENSG00000079308, ENSG00000132669, ENSG00000179399, ENSG00000114019, ENSG00000204580, ENSG00000147869, ENSG00000120129, ENSG00000010319, ENSG0000…	411	1899	19277	1.38312	0.26879
GO TERM: BP	GO:0048870~cell motility	GO:0048870	cell motility	56	11.4053	0.0113089	ENSG00000181104, ENSG00000064042, ENSG00000137869, ENSG00000173482, ENSG00000112769, ENSG00000107738, ENSG00000065534, ENSG00000170689, ENSG00000128917, ENSG00000183098, ENSG00000164251, ENSG00000137261, ENSG00000108187, ENSG00000143153, ENSG00000124875, ENSG00000079308, ENSG00000132669, ENSG00000179399, ENSG00000114019, ENSG00000204580, ENSG00000147869, ENSG00000120129, ENSG00000010319, ENSG0000…	411	1899	19277	1.38312	0.26879
GO TERM: MF	GO:0031418~L-ascorbic acid binding	GO:0031418	L-ascorbic acid binding	4	0.814664	0.0113956	ENSG00000129521, ENSG00000072682, ENSG00000145730, ENSG00000152952	381	21	16739	8.36845	0.221677
GO TERM: BP	GO:0048588~developmental cell growth	GO:0048588	developmental cell growth	12	2.44399	0.0114897	ENSG00000082684, ENSG00000055163, ENSG00000137261, ENSG00000010319, ENSG00000149269, ENSG00000187688, ENSG00000115414, ENSG00000143320, ENSG00000145147, ENSG00000106078, ENSG00000118257, ENSG00000204580	411	233	19277	2.41559	0.270187
GO TERM: BP	GO:0003205~cardiac chamber development	GO:0003205	cardiac chamber development	10	2.03666	0.0115108	ENSG00000164683, ENSG00000077092, ENSG00000128917, ENSG00000106031, ENSG00000163703, ENSG00000145147, ENSG00000185008, ENSG00000049192, ENSG00000104881, ENSG00000118257	411	172	19277	2.7269	0.270187
GO TERM: BP	GO:0030510~regulation of BMP signaling pathway	GO:0030510	regulation of BMP signaling pathway	8	1.62933	0.0115134	ENSG00000150938, ENSG00000147869, ENSG00000163430, ENSG00000166147, ENSG00000187045, ENSG00000146197, ENSG00000106031, ENSG00000137642	411	115	19277	3.26279	0.270187
GO TERM: BP	GO:2000564~regulation of CD8-positive, alpha-beta T cell proliferation	GO:2000564	regulation of CD8-positive, alpha-beta T cell proliferation	3	0.610998	0.0116075	ENSG00000206503, ENSG00000107738, ENSG00000204592	411	8	19277	17.5885	0.270187
GO TERM: BP	GO:0070837~dehydroascorbic acid transport	GO:0070837	dehydroascorbic acid transport	3	0.610998	0.0116075	ENSG00000173262, ENSG00000170482, ENSG00000059804	411	8	19277	17.5885	0.270187
GO TERM: BP	GO:0019216~regulation of lipid metabolic process	GO:0019216	regulation of lipid metabolic process	18	3.66599	0.0117124	ENSG00000153395, ENSG00000110244, ENSG00000196139, ENSG00000131781, ENSG00000137642, ENSG00000244474, ENSG00000112293, ENSG00000142784, ENSG00000142178, ENSG00000110090, ENSG00000050165, ENSG00000182156, ENSG00000100311, ENSG00000095637, ENSG00000124253, ENSG00000089163, ENSG00000165953, ENSG00000145335	411	433	19277	1.94976	0.271505
GO TERM: BP	GO:0016051~carbohydrate biosynthetic process	GO:0016051	carbohydrate biosynthetic process	12	2.44399	0.0118051	ENSG00000142178, ENSG00000166741, ENSG00000219607, ENSG00000111674, ENSG00000237172, ENSG00000100311, ENSG00000095637, ENSG00000124253, ENSG00000156966, ENSG00000165953, ENSG00000167080, ENSG00000145335	411	234	19277	2.40527	0.272533
GO TERM: BP	GO:0040017~positive regulation of locomotion	GO:0040017	positive regulation of locomotion	24	4.88798	0.0118721	ENSG00000158856, ENSG00000105971, ENSG00000181104, ENSG00000161638, ENSG00000132669, ENSG00000107738, ENSG00000181284, ENSG00000136960, ENSG00000065534, ENSG00000115414, ENSG00000118257, ENSG00000082684, ENSG00000112293, ENSG00000113140, ENSG00000006210, ENSG00000184481, ENSG00000138772, ENSG00000164251, ENSG00000010319, ENSG00000149269, ENSG00000100311, ENSG00000145147, ENSG00000165215, ENSG0000…	411	647	19277	1.73982	0.272962
GO TERM: BP	GO:0090207~regulation of triglyceride metabolic process	GO:0090207	regulation of triglyceride metabolic process	5	1.01833	0.0119367	ENSG00000112293, ENSG00000142178, ENSG00000110244, ENSG00000137642, ENSG00000165953	411	42	19277	5.58365	0.27333
GO TERM: CC	GO:0031526~brush border membrane	GO:0031526	brush border membrane	6	1.222	0.0120368	ENSG00000099834, ENSG00000167434, ENSG00000174827, ENSG00000156222, ENSG00000197375, ENSG00000138823	396	60	17223	4.34924	0.171451
GO TERM: BP	GO:0048589~developmental growth	GO:0048589	developmental growth	25	5.09165	0.0122445	ENSG00000104324, ENSG00000137869, ENSG00000115414, ENSG00000117139, ENSG00000148180, ENSG00000118257, ENSG00000142784, ENSG00000077092, ENSG00000137261, ENSG00000104881, ENSG00000169231, ENSG00000204580, ENSG00000147869, ENSG00000082684, ENSG00000175707, ENSG00000055163, ENSG00000010319, ENSG00000149269, ENSG00000187688, ENSG00000108576, ENSG00000145147, ENSG00000106078, ENSG00000143320, ENSG0000…	411	687	19277	1.70679	0.279245
GO TERM: BP	GO:0010976~positive regulation of neuron projection development	GO:0010976	positive regulation of neuron projection development	14	2.85132	0.0123818	ENSG00000111249, ENSG00000130427, ENSG00000119782, ENSG00000115414, ENSG00000136040, ENSG00000166313, ENSG00000006210, ENSG00000149269, ENSG00000187688, ENSG00000143320, ENSG00000145147, ENSG00000106078, ENSG00000185008, ENSG00000147852	411	300	19277	2.18879	0.281237
GO TERM: CC	GO:0044437~vacuolar part	GO:0044437	vacuolar part	25	5.09165	0.0124408	ENSG00000154265, ENSG00000173083, ENSG00000153395, ENSG00000204099, ENSG00000135047, ENSG00000117298, ENSG00000078081, ENSG00000183098, ENSG00000123643, ENSG00000179163, ENSG00000147852, ENSG00000104044, ENSG00000185339, ENSG00000047457, ENSG00000179399, ENSG00000077585, ENSG00000112293, ENSG00000163131, ENSG00000142156, ENSG00000166340, ENSG00000206503, ENSG00000166825, ENSG00000185201, ENSG0000…	396	638	17223	1.70425	0.172987
GO TERM: BP	GO:0006631~fatty acid metabolic process	GO:0006631	fatty acid metabolic process	18	3.66599	0.0127065	ENSG00000103066, ENSG00000197142, ENSG00000110244, ENSG00000138109, ENSG00000136881, ENSG00000196139, ENSG00000138115, ENSG00000244474, ENSG00000165475, ENSG00000142784, ENSG00000140284, ENSG00000110090, ENSG00000163898, ENSG00000145730, ENSG00000124253, ENSG00000089163, ENSG00000124212, ENSG00000145335	411	437	19277	1.93192	0.28655
GO TERM: MF	GO:0044877~macromolecular complex binding	GO:0044877	macromolecular complex binding	45	9.16497	0.0127087	ENSG00000161638, ENSG00000106823, ENSG00000106624, ENSG00000128591, ENSG00000109738, ENSG00000135047, ENSG00000111674, ENSG00000115414, ENSG00000261582, ENSG00000148180, ENSG00000204592, ENSG00000137642, ENSG00000021852, ENSG00000174827, ENSG00000166313, ENSG00000006210, ENSG00000077092, ENSG00000160593, ENSG00000143153, ENSG00000095637, ENSG00000162614, ENSG00000147852, ENSG00000187955, ENSG0000…	381	1374	16739	1.4389	0.242032
GO TERM: BP	GO:0032535~regulation of cellular component size	GO:0032535	regulation of cellular component size	17	3.46232	0.0127174	ENSG00000099834, ENSG00000158856, ENSG00000155792, ENSG00000115414, ENSG00000148180, ENSG00000082684, ENSG00000142784, ENSG00000055163, ENSG00000164251, ENSG00000137261, ENSG00000010319, ENSG00000149269, ENSG00000187688, ENSG00000143320, ENSG00000145147, ENSG00000127831, ENSG00000080293	411	402	19277	1.98345	0.28655
GO TERM: BP	GO:0045664~regulation of neuron differentiation	GO:0045664	regulation of neuron differentiation	25	5.09165	0.0128204	ENSG00000204099, ENSG00000115414, ENSG00000119782, ENSG00000074181, ENSG00000166313, ENSG00000006210, ENSG00000137261, ENSG00000162415, ENSG00000147852, ENSG00000111249, ENSG00000130427, ENSG00000132003, ENSG00000082684, ENSG00000170558, ENSG00000136040, ENSG00000164683, ENSG00000143869, ENSG00000010319, ENSG00000149269, ENSG00000187688, ENSG00000108576, ENSG00000145147, ENSG00000106078, ENSG0000…	411	690	19277	1.69937	0.287719
GO TERM: BP	GO:0051180~vitamin transport	GO:0051180	vitamin transport	5	1.01833	0.0129452	ENSG00000173262, ENSG00000170482, ENSG00000145321, ENSG00000059804, ENSG00000185339	411	43	19277	5.4538	0.28826
GO TERM: BP	GO:0006936~muscle contraction	GO:0006936	muscle contraction	16	3.25866	0.0129469	ENSG00000105048, ENSG00000181104, ENSG00000130821, ENSG00000173991, ENSG00000170175, ENSG00000065534, ENSG00000119782, ENSG00000148180, ENSG00000168743, ENSG00000166313, ENSG00000120049, ENSG00000143153, ENSG00000121361, ENSG00000058668, ENSG00000095637, ENSG00000104881	411	369	19277	2.03372	0.28826
GO TERM: MF	GO:0005355~glucose transmembrane transporter activity	GO:0005355	glucose transmembrane transporter activity	4	0.814664	0.0129766	ENSG00000173262, ENSG00000198743, ENSG00000158865, ENSG00000059804	381	22	16739	7.98807	0.242032
GO TERM: BP	GO:0051093~negative regulation of developmental process	GO:0051093	negative regulation of developmental process	36	7.33198	0.0131141	ENSG00000154265, ENSG00000065970, ENSG00000173482, ENSG00000204099, ENSG00000134013, ENSG00000074181, ENSG00000137642, ENSG00000150938, ENSG00000184481, ENSG00000006210, ENSG00000077092, ENSG00000128917, ENSG00000137261, ENSG00000108187, ENSG00000058668, ENSG00000158856, ENSG00000150593, ENSG00000132703, ENSG00000077585, ENSG00000117228, ENSG00000120937, ENSG00000105707, ENSG00000147869, ENSG0000…	411	1110	19277	1.52117	0.290833
GO TERM: MF	GO:0033300~dehydroascorbic acid transporter activity	GO:0033300	dehydroascorbic acid transporter activity	3	0.610998	0.0131463	ENSG00000173262, ENSG00000170482, ENSG00000059804	381	8	16739	16.4754	0.242032
GO TERM: BP	GO:0072659~protein localization to plasma membrane	GO:0072659	protein localization to plasma membrane	13	2.64766	0.0132549	ENSG00000179841, ENSG00000039068, ENSG00000104537, ENSG00000117228, ENSG00000150551, ENSG00000170558, ENSG00000084710, ENSG00000174827, ENSG00000166341, ENSG00000143153, ENSG00000058668, ENSG00000095637, ENSG00000127831	411	270	19277	2.25828	0.292803
GO TERM: CC	GO:0005901~caveola	GO:0005901	caveola	7	1.42566	0.0134064	ENSG00000105971, ENSG00000181104, ENSG00000039068, ENSG00000143153, ENSG00000095637, ENSG00000058668, ENSG00000124212	396	85	17223	3.58173	0.182034
GO TERM: BP	GO:0048598~embryonic morphogenesis	GO:0048598	embryonic morphogenesis	23	4.68432	0.0134347	ENSG00000161638, ENSG00000111799, ENSG00000173991, ENSG00000107829, ENSG00000105707, ENSG00000115414, ENSG00000147869, ENSG00000166145, ENSG00000175707, ENSG00000142156, ENSG00000170689, ENSG00000117298, ENSG00000165730, ENSG00000166147, ENSG00000077092, ENSG00000128917, ENSG00000120129, ENSG00000143869, ENSG00000121075, ENSG00000106031, ENSG00000143320, ENSG00000106078, ENSG00000092607	411	618	19277	1.74557	0.295615
GO TERM: MF	GO:0030020~extracellular matrix structural constituent conferring tensile strength	GO:0030020	extracellular matrix structural constituent conferring tensile strength	5	1.01833	0.0136614	ENSG00000142156, ENSG00000188153, ENSG00000111799, ENSG00000049089, ENSG00000187955	381	41	16739	5.35785	0.247103
GO TERM: CC	GO:0030667~secretory granule membrane	GO:0030667	secretory granule membrane	15	3.05499	0.0137149	ENSG00000105971, ENSG00000174992, ENSG00000153395, ENSG00000115257, ENSG00000006534, ENSG00000113140, ENSG00000167434, ENSG00000140284, ENSG00000078081, ENSG00000166825, ENSG00000127329, ENSG00000145730, ENSG00000014257, ENSG00000059804, ENSG00000145335	396	313	17223	2.0843	0.182034
GO TERM: BP	GO:0035455~response to interferon-alpha	GO:0035455	response to interferon-alpha	4	0.814664	0.0138766	ENSG00000078081, ENSG00000089127, ENSG00000185201, ENSG00000119917	411	24	19277	7.81711	0.302972
GO TERM: BP	GO:0046628~positive regulation of insulin receptor signaling pathway	GO:0046628	positive regulation of insulin receptor signaling pathway	4	0.814664	0.0138766	ENSG00000149269, ENSG00000095637, ENSG00000137642, ENSG00000165953	411	24	19277	7.81711	0.302972
GO TERM: BP	GO:0031346~positive regulation of cell projection organization	GO:0031346	positive regulation of cell projection organization	17	3.46232	0.0140033	ENSG00000111249, ENSG00000130427, ENSG00000136960, ENSG00000119782, ENSG00000115414, ENSG00000136040, ENSG00000166313, ENSG00000006210, ENSG00000164251, ENSG00000149269, ENSG00000187688, ENSG00000143320, ENSG00000145147, ENSG00000106078, ENSG00000185008, ENSG00000127831, ENSG00000147852	411	407	19277	1.95908	0.304558
GO TERM: BP	GO:0048525~negative regulation of viral process	GO:0048525	negative regulation of viral process	9	1.83299	0.0145229	ENSG00000244509, ENSG00000132109, ENSG00000132703, ENSG00000089127, ENSG00000179750, ENSG00000185201, ENSG00000008517, ENSG00000148180, ENSG00000111331	411	149	19277	2.83305	0.314644
GO TERM: CC	GO:0005903~brush border	GO:0005903	brush border	8	1.62933	0.0146705	ENSG00000099834, ENSG00000167434, ENSG00000174827, ENSG00000156222, ENSG00000197375, ENSG00000170482, ENSG00000138823, ENSG00000127831	396	112	17223	3.1066	0.19039
GO TERM: MF	GO:0015149~hexose transmembrane transporter activity	GO:0015149	hexose transmembrane transporter activity	4	0.814664	0.0146764	ENSG00000173262, ENSG00000198743, ENSG00000158865, ENSG00000059804	381	23	16739	7.64076	0.260886
GO TERM: BP	GO:0001676~long-chain fatty acid metabolic process	GO:0001676	long-chain fatty acid metabolic process	8	1.62933	0.0149091	ENSG00000140284, ENSG00000197142, ENSG00000110090, ENSG00000138109, ENSG00000196139, ENSG00000145730, ENSG00000138115, ENSG00000124212	411	121	19277	3.101	0.321775
GO TERM: BP	GO:0030335~positive regulation of cell migration	GO:0030335	positive regulation of cell migration	22	4.48065	0.0149902	ENSG00000158856, ENSG00000181104, ENSG00000161638, ENSG00000132669, ENSG00000107738, ENSG00000181284, ENSG00000136960, ENSG00000065534, ENSG00000115414, ENSG00000118257, ENSG00000082684, ENSG00000112293, ENSG00000113140, ENSG00000006210, ENSG00000184481, ENSG00000138772, ENSG00000164251, ENSG00000010319, ENSG00000149269, ENSG00000100311, ENSG00000165215, ENSG00000127831	411	588	19277	1.75486	0.32229
GO TERM: BP	GO:0016339~calcium-dependent cell-cell adhesion via plasma membrane cell adhesion molecules	GO:0016339	calcium-dependent cell-cell adhesion via plasma membrane cell adhesion molecules	5	1.01833	0.0151215	ENSG00000170558, ENSG00000113361, ENSG00000079112, ENSG00000166341, ENSG00000113100	411	45	19277	5.21141	0.323023
GO TERM: BP	GO:0014068~positive regulation of phosphatidylinositol 3-kinase signaling	GO:0014068	positive regulation of phosphatidylinositol 3-kinase signaling	7	1.42566	0.015139	ENSG00000107731, ENSG00000181104, ENSG00000164251, ENSG00000130427, ENSG00000100311, ENSG00000115414, ENSG00000165953	411	94	19277	3.49275	0.323023
GO TERM: BP	GO:0044283~small molecule biosynthetic process	GO:0044283	small molecule biosynthetic process	22	4.48065	0.0153617	ENSG00000137869, ENSG00000111674, ENSG00000110244, ENSG00000138109, ENSG00000136881, ENSG00000196139, ENSG00000152952, ENSG00000138115, ENSG00000142784, ENSG00000142178, ENSG00000140284, ENSG00000118514, ENSG00000166741, ENSG00000008311, ENSG00000163898, ENSG00000050165, ENSG00000058668, ENSG00000143320, ENSG00000124253, ENSG00000124212, ENSG00000165953, ENSG00000145335	411	590	19277	1.74891	0.325096
GO TERM: BP	GO:1905950~monosaccharide transmembrane transport	GO:1905950	monosaccharide transmembrane transport	4	0.814664	0.0155247	ENSG00000173262, ENSG00000198743, ENSG00000158865, ENSG00000059804	411	25	19277	7.50443	0.325096
GO TERM: BP	GO:0035428~hexose transmembrane transport	GO:0035428	hexose transmembrane transport	4	0.814664	0.0155247	ENSG00000173262, ENSG00000198743, ENSG00000158865, ENSG00000059804	411	25	19277	7.50443	0.325096
GO TERM: BP	GO:1904659~glucose transmembrane transport	GO:1904659	glucose transmembrane transport	4	0.814664	0.0155247	ENSG00000173262, ENSG00000198743, ENSG00000158865, ENSG00000059804	411	25	19277	7.50443	0.325096
GO TERM: BP	GO:0042403~thyroid hormone metabolic process	GO:0042403	thyroid hormone metabolic process	4	0.814664	0.0155247	ENSG00000112394, ENSG00000104324, ENSG00000103316, ENSG00000105707	411	25	19277	7.50443	0.325096
GO TERM: BP	GO:0042493~response to drug	GO:0042493	response to drug	17	3.46232	0.015648	ENSG00000106688, ENSG00000197375, ENSG00000173482, ENSG00000039068, ENSG00000138109, ENSG00000265972, ENSG00000138115, ENSG00000112293, ENSG00000174827, ENSG00000166741, ENSG00000056972, ENSG00000157150, ENSG00000110090, ENSG00000147872, ENSG00000108576, ENSG00000145730, ENSG00000145335	411	412	19277	1.9353	0.326463
GO TERM: BP	GO:0050792~regulation of viral process	GO:0050792	regulation of viral process	15	3.05499	0.0158162	ENSG00000105971, ENSG00000244509, ENSG00000132703, ENSG00000132109, ENSG00000179750, ENSG00000105707, ENSG00000008517, ENSG00000148180, ENSG00000111331, ENSG00000138496, ENSG00000078081, ENSG00000056972, ENSG00000089127, ENSG00000185201, ENSG00000107201	411	343	19277	2.05114	0.328715
GO TERM: BP	GO:0051960~regulation of nervous system development	GO:0051960	regulation of nervous system development	32	6.51731	0.0158726	ENSG00000204099, ENSG00000115414, ENSG00000119782, ENSG00000074181, ENSG00000137642, ENSG00000166313, ENSG00000006210, ENSG00000077092, ENSG00000128917, ENSG00000183098, ENSG00000137261, ENSG00000162415, ENSG00000147852, ENSG00000145335, ENSG00000111249, ENSG00000130427, ENSG00000153902, ENSG00000132003, ENSG00000082684, ENSG00000170558, ENSG00000136040, ENSG00000166145, ENSG00000164683, ENSG0000…	411	969	19277	1.5489	0.328715
GO TERM: BP	GO:0010950~positive regulation of endopeptidase activity	GO:0010950	positive regulation of endopeptidase activity	10	2.03666	0.0161429	ENSG00000181104, ENSG00000129521, ENSG00000055163, ENSG00000106688, ENSG00000121858, ENSG00000107738, ENSG00000137831, ENSG00000148180, ENSG00000145335, ENSG00000181634	411	182	19277	2.57707	0.333087
GO TERM: BP	GO:1902667~regulation of axon guidance	GO:1902667	regulation of axon guidance	5	1.01833	0.0162909	ENSG00000082684, ENSG00000010319, ENSG00000162415, ENSG00000145147, ENSG00000132003	411	46	19277	5.09812	0.334915
GO TERM: BP	GO:0030514~negative regulation of BMP signaling pathway	GO:0030514	negative regulation of BMP signaling pathway	6	1.222	0.0166201	ENSG00000150938, ENSG00000147869, ENSG00000163430, ENSG00000166147, ENSG00000187045, ENSG00000137642	411	70	19277	4.02023	0.339207
GO TERM: BP	GO:0050922~negative regulation of chemotaxis	GO:0050922	negative regulation of chemotaxis	6	1.222	0.0166201	ENSG00000082684, ENSG00000137869, ENSG00000120129, ENSG00000010319, ENSG00000145147, ENSG00000185008	411	70	19277	4.02023	0.339207
GO TERM: BP	GO:0006793~phosphorus metabolic process	GO:0006793	phosphorus metabolic process	94	19.1446	0.0173882	ENSG00000181104, ENSG00000155850, ENSG00000064042, ENSG00000106688, ENSG00000153395, ENSG00000173482, ENSG00000150281, ENSG00000111674, ENSG00000065534, ENSG00000170775, ENSG00000167080, ENSG00000060642, ENSG00000165861, ENSG00000164251, ENSG00000108187, ENSG00000143153, ENSG00000143036, ENSG00000145335, ENSG00000102230, ENSG00000150593, ENSG00000130768, ENSG00000131370, ENSG00000204580, ENSG0000…	411	3562	19277	1.23775	0.353277
GO TERM: BP	GO:0060337~type I interferon signaling pathway	GO:0060337	type I interferon signaling pathway	7	1.42566	0.0174349	ENSG00000206503, ENSG00000089127, ENSG00000185201, ENSG00000162645, ENSG00000119917, ENSG00000111331, ENSG00000204592	411	97	19277	3.38473	0.353277
GO TERM: CC	GO:0015629~actin cytoskeleton	GO:0015629	actin cytoskeleton	21	4.27699	0.0179349	ENSG00000158856, ENSG00000214357, ENSG00000105048, ENSG00000064042, ENSG00000039068, ENSG00000065534, ENSG00000117228, ENSG00000171992, ENSG00000148180, ENSG00000074181, ENSG00000170558, ENSG00000146966, ENSG00000084710, ENSG00000104081, ENSG00000149269, ENSG00000162614, ENSG00000095637, ENSG00000106078, ENSG00000127831, ENSG00000107201, ENSG00000145335	396	522	17223	1.7497	0.227695
GO TERM: BP	GO:0002138~retinoic acid biosynthetic process	GO:0002138	retinoic acid biosynthetic process	3	0.610998	0.0181381	ENSG00000118514, ENSG00000196139, ENSG00000143320	411	10	19277	14.0708	0.366208
GO TERM: BP	GO:0071357~cellular response to type I interferon	GO:0071357	cellular response to type I interferon	7	1.42566	0.0182505	ENSG00000206503, ENSG00000089127, ENSG00000185201, ENSG00000162645, ENSG00000119917, ENSG00000111331, ENSG00000204592	411	98	19277	3.35019	0.367162
GO TERM: BP	GO:0090101~negative regulation of transmembrane receptor protein serine/threonine kinase signaling pathway	GO:0090101	negative regulation of transmembrane receptor protein serine/threonine kinase signaling pathway	9	1.83299	0.0186442	ENSG00000150938, ENSG00000147869, ENSG00000105971, ENSG00000163430, ENSG00000166147, ENSG00000187045, ENSG00000108187, ENSG00000164488, ENSG00000137642	411	156	19277	2.70592	0.371498
GO TERM: BP	GO:0050919~negative chemotaxis	GO:0050919	negative chemotaxis	5	1.01833	0.0187959	ENSG00000082684, ENSG00000010319, ENSG00000145147, ENSG00000185008, ENSG00000118257	411	48	19277	4.8857	0.371498
GO TERM: BP	GO:0007157~heterophilic cell-cell adhesion via plasma membrane cell adhesion molecules	GO:0007157	heterophilic cell-cell adhesion via plasma membrane cell adhesion molecules	5	1.01833	0.0187959	ENSG00000170558, ENSG00000161638, ENSG00000073008, ENSG00000160593, ENSG00000166341	411	48	19277	4.8857	0.371498
GO TERM: BP	GO:0017144~drug metabolic process	GO:0017144	drug metabolic process	5	1.01833	0.0187959	ENSG00000076258, ENSG00000010932, ENSG00000138109, ENSG00000131781, ENSG00000138115	411	48	19277	4.8857	0.371498
GO TERM: BP	GO:0009268~response to pH	GO:0009268	response to pH	5	1.01833	0.0187959	ENSG00000163131, ENSG00000112293, ENSG00000143595, ENSG00000124253, ENSG00000145730	411	48	19277	4.8857	0.371498
GO TERM: CC	GO:0044853~plasma membrane raft	GO:0044853	plasma membrane raft	8	1.62933	0.0190288	ENSG00000170558, ENSG00000105971, ENSG00000181104, ENSG00000039068, ENSG00000143153, ENSG00000095637, ENSG00000058668, ENSG00000124212	396	118	17223	2.94864	0.236443
GO TERM: BP	GO:1900078~positive regulation of cellular response to insulin stimulus	GO:1900078	positive regulation of cellular response to insulin stimulus	4	0.814664	0.0191379	ENSG00000149269, ENSG00000095637, ENSG00000137642, ENSG00000165953	411	27	19277	6.94854	0.376936
GO TERM: BP	GO:0051592~response to calcium ion	GO:0051592	response to calcium ion	9	1.83299	0.0192948	ENSG00000113140, ENSG00000112293, ENSG00000158856, ENSG00000120049, ENSG00000120129, ENSG00000138823, ENSG00000265972, ENSG00000196139, ENSG00000135643	411	157	19277	2.68869	0.378702
GO TERM: BP	GO:0002576~platelet degranulation	GO:0002576	platelet degranulation	8	1.62933	0.0197084	ENSG00000113140, ENSG00000108679, ENSG00000158856, ENSG00000149131, ENSG00000102316, ENSG00000100665, ENSG00000100311, ENSG00000115414	411	128	19277	2.93142	0.385478
GO TERM: CC	GO:0005775~vacuolar lumen	GO:0005775	vacuolar lumen	10	2.03666	0.0198066	ENSG00000163131, ENSG00000173083, ENSG00000166340, ENSG00000183098, ENSG00000179399, ENSG00000135047, ENSG00000204099, ENSG00000145321, ENSG00000179163, ENSG00000185339	396	175	17223	2.48528	0.24098
GO TERM: BP	GO:0045087~innate immune response	GO:0045087	innate immune response	36	7.33198	0.0198712	ENSG00000244509, ENSG00000149131, ENSG00000135047, ENSG00000205220, ENSG00000110244, ENSG00000116701, ENSG00000173702, ENSG00000148180, ENSG00000111331, ENSG00000204592, ENSG00000021852, ENSG00000138496, ENSG00000006210, ENSG00000123843, ENSG00000089127, ENSG00000164251, ENSG00000145335, ENSG00000073008, ENSG00000173193, ENSG00000132703, ENSG00000132109, ENSG00000130768, ENSG00000179750, ENSG0000…	411	1144	19277	1.47596	0.3864
GO TERM: BP	GO:0048699~generation of neurons	GO:0048699	generation of neurons	48	9.77597	0.0199468	ENSG00000107731, ENSG00000173482, ENSG00000150281, ENSG00000039068, ENSG00000204099, ENSG00000110244, ENSG00000115414, ENSG00000119782, ENSG00000189195, ENSG00000074181, ENSG00000137642, ENSG00000170775, ENSG00000118257, ENSG00000166313, ENSG00000117298, ENSG00000006210, ENSG00000128917, ENSG00000137261, ENSG00000162415, ENSG00000162614, ENSG00000147852, ENSG00000111249, ENSG00000130427, ENSG0000…	411	1630	19277	1.38118	0.3864
GO TERM: BP	GO:2001056~positive regulation of cysteine-type endopeptidase activity	GO:2001056	positive regulation of cysteine-type endopeptidase activity	9	1.83299	0.0199614	ENSG00000181104, ENSG00000129521, ENSG00000055163, ENSG00000106688, ENSG00000121858, ENSG00000137831, ENSG00000148180, ENSG00000145335, ENSG00000181634	411	158	19277	2.67167	0.3864
GO TERM: BP	GO:0051128~regulation of cellular component organization	GO:0051128	regulation of cellular component organization	78	15.8859	0.0200894	ENSG00000064042, ENSG00000175662, ENSG00000158806, ENSG00000106327, ENSG00000111674, ENSG00000145536, ENSG00000166313, ENSG00000137463, ENSG00000183098, ENSG00000164251, ENSG00000137261, ENSG00000145730, ENSG00000145335, ENSG00000104537, ENSG00000167371, ENSG00000105707, ENSG00000171992, ENSG00000150551, ENSG00000204580, ENSG00000174469, ENSG00000172638, ENSG00000121858, ENSG00000120129, ENSG0000…	411	2892	19277	1.26501	0.387547
GO TERM: MF	GO:0005125~cytokine activity	GO:0005125	cytokine activity	12	2.44399	0.0203136	ENSG00000147869, ENSG00000006210, ENSG00000121858, ENSG00000123999, ENSG00000130427, ENSG00000143869, ENSG00000150281, ENSG00000124875, ENSG00000008517, ENSG00000116985, ENSG00000139269, ENSG00000181634	381	238	16739	2.21518	0.354972
GO TERM: BP	GO:0003333~amino acid transmembrane transport	GO:0003333	amino acid transmembrane transport	6	1.222	0.0206636	ENSG00000112394, ENSG00000106688, ENSG00000147003, ENSG00000099960, ENSG00000123643, ENSG00000139209	411	74	19277	3.80292	0.396482
GO TERM: BP	GO:0008361~regulation of cell size	GO:0008361	regulation of cell size	10	2.03666	0.0206933	ENSG00000082684, ENSG00000142784, ENSG00000155792, ENSG00000137261, ENSG00000010319, ENSG00000149269, ENSG00000187688, ENSG00000115414, ENSG00000143320, ENSG00000080293	411	190	19277	2.46856	0.396482
GO TERM: BP	GO:0043900~regulation of multi-organism process	GO:0043900	regulation of multi-organism process	19	3.86965	0.0208598	ENSG00000105971, ENSG00000244509, ENSG00000132703, ENSG00000132109, ENSG00000174992, ENSG00000179750, ENSG00000105707, ENSG00000008517, ENSG00000148180, ENSG00000111331, ENSG00000006210, ENSG00000138496, ENSG00000078081, ENSG00000056972, ENSG00000164251, ENSG00000089127, ENSG00000185201, ENSG00000124875, ENSG00000107201	411	499	19277	1.78587	0.398316
GO TERM: BP	GO:0019883~antigen processing and presentation of endogenous antigen	GO:0019883	antigen processing and presentation of endogenous antigen	4	0.814664	0.0211037	ENSG00000231925, ENSG00000206503, ENSG00000164307, ENSG00000204592	411	28	19277	6.70038	0.401612
GO TERM: BP	GO:0006721~terpenoid metabolic process	GO:0006721	terpenoid metabolic process	8	1.62933	0.0212573	ENSG00000118514, ENSG00000183098, ENSG00000179399, ENSG00000110244, ENSG00000138109, ENSG00000196139, ENSG00000143320, ENSG00000138115	411	130	19277	2.88632	0.403173
GO TERM: BP	GO:0045596~negative regulation of cell differentiation	GO:0045596	negative regulation of cell differentiation	27	5.49898	0.0213939	ENSG00000154265, ENSG00000204099, ENSG00000074181, ENSG00000137642, ENSG00000150938, ENSG00000184481, ENSG00000006210, ENSG00000077092, ENSG00000137261, ENSG00000108187, ENSG00000158856, ENSG00000150593, ENSG00000132703, ENSG00000077585, ENSG00000117228, ENSG00000105707, ENSG00000082684, ENSG00000186790, ENSG00000164683, ENSG00000166147, ENSG00000161031, ENSG00000123999, ENSG00000010319, ENSG0000…	411	799	19277	1.58495	0.404108
GO TERM: BP	GO:0033036~macromolecule localization	GO:0033036	macromolecule localization	86	17.5153	0.0214501	ENSG00000214357, ENSG00000181104, ENSG00000173083, ENSG00000106688, ENSG00000175662, ENSG00000137869, ENSG00000106327, ENSG00000198743, ENSG00000117139, ENSG00000261582, ENSG00000095383, ENSG00000084731, ENSG00000166313, ENSG00000140284, ENSG00000137463, ENSG00000078081, ENSG00000183098, ENSG00000164251, ENSG00000137261, ENSG00000108187, ENSG00000147872, ENSG00000143153, ENSG00000145730, ENSG0000…	411	3246	19277	1.24265	0.404108
GO TERM: BP	GO:0046503~glycerolipid catabolic process	GO:0046503	glycerolipid catabolic process	6	1.222	0.0217662	ENSG00000112293, ENSG00000103066, ENSG00000163898, ENSG00000136960, ENSG00000110244, ENSG00000137642	411	75	19277	3.75221	0.406401
GO TERM: BP	GO:0003093~regulation of glomerular filtration	GO:0003093	regulation of glomerular filtration	3	0.610998	0.0218604	ENSG00000181104, ENSG00000164251, ENSG00000100311	411	11	19277	12.7916	0.406401
GO TERM: BP	GO:0035542~regulation of SNARE complex assembly	GO:0035542	regulation of SNARE complex assembly	3	0.610998	0.0218604	ENSG00000147003, ENSG00000167371, ENSG00000145335	411	11	19277	12.7916	0.406401
GO TERM: BP	GO:0016102~diterpenoid biosynthetic process	GO:0016102	diterpenoid biosynthetic process	3	0.610998	0.0218604	ENSG00000118514, ENSG00000196139, ENSG00000143320	411	11	19277	12.7916	0.406401
GO TERM: BP	GO:1901699~cellular response to nitrogen compound	GO:1901699	cellular response to nitrogen compound	26	5.29532	0.0223886	ENSG00000105971, ENSG00000106688, ENSG00000039068, ENSG00000137642, ENSG00000142784, ENSG00000184481, ENSG00000137463, ENSG00000095637, ENSG00000058668, ENSG00000124253, ENSG00000145335, ENSG00000180720, ENSG00000158856, ENSG00000150551, ENSG00000156711, ENSG00000112293, ENSG00000142156, ENSG00000158270, ENSG00000166147, ENSG00000118507, ENSG00000149269, ENSG00000108576, ENSG00000145147, ENSG0000…	411	764	19277	1.59616	0.412892
GO TERM: BP	GO:0002683~negative regulation of immune system process	GO:0002683	negative regulation of immune system process	25	5.09165	0.0224017	ENSG00000137869, ENSG00000149131, ENSG00000107738, ENSG00000076641, ENSG00000111331, ENSG00000204592, ENSG00000006210, ENSG00000123843, ENSG00000089127, ENSG00000164251, ENSG00000080293, ENSG00000160654, ENSG00000173193, ENSG00000132703, ENSG00000132109, ENSG00000130768, ENSG00000077585, ENSG00000117228, ENSG00000166147, ENSG00000206503, ENSG00000161031, ENSG00000123999, ENSG00000120129, ENSG0000…	411	726	19277	1.61511	0.412892
GO TERM: BP	GO:0016042~lipid catabolic process	GO:0016042	lipid catabolic process	15	3.05499	0.0226024	ENSG00000103066, ENSG00000137869, ENSG00000130768, ENSG00000204099, ENSG00000136960, ENSG00000110244, ENSG00000196139, ENSG00000137642, ENSG00000112293, ENSG00000140284, ENSG00000110090, ENSG00000163898, ENSG00000182156, ENSG00000179163, ENSG00000124253	411	360	19277	1.95428	0.412892
GO TERM: BP	GO:0022600~digestive system process	GO:0022600	digestive system process	7	1.42566	0.0227215	ENSG00000160181, ENSG00000197375, ENSG00000108187, ENSG00000110244, ENSG00000182156, ENSG00000127831, ENSG00000173702	411	103	19277	3.18756	0.412892
GO TERM: BP	GO:0050818~regulation of coagulation	GO:0050818	regulation of coagulation	7	1.42566	0.0227215	ENSG00000158856, ENSG00000181104, ENSG00000173083, ENSG00000164251, ENSG00000149131, ENSG00000100311, ENSG00000196975	411	103	19277	3.18756	0.412892
GO TERM: BP	GO:0034340~response to type I interferon	GO:0034340	response to type I interferon	7	1.42566	0.0227215	ENSG00000206503, ENSG00000089127, ENSG00000185201, ENSG00000162645, ENSG00000119917, ENSG00000111331, ENSG00000204592	411	103	19277	3.18756	0.412892
GO TERM: BP	GO:0010770~positive regulation of cell morphogenesis involved in differentiation	GO:0010770	positive regulation of cell morphogenesis involved in differentiation	9	1.83299	0.022792	ENSG00000158856, ENSG00000136040, ENSG00000111249, ENSG00000149269, ENSG00000187688, ENSG00000115414, ENSG00000143320, ENSG00000145147, ENSG00000185008	411	162	19277	2.6057	0.412892
GO TERM: BP	GO:0009607~response to biotic stimulus	GO:0009607	response to biotic stimulus	39	7.94297	0.0227959	ENSG00000181104, ENSG00000244509, ENSG00000174992, ENSG00000197375, ENSG00000111331, ENSG00000204592, ENSG00000138496, ENSG00000006210, ENSG00000138772, ENSG00000123843, ENSG00000157150, ENSG00000089127, ENSG00000164251, ENSG00000124875, ENSG00000121361, ENSG00000124253, ENSG00000145335, ENSG00000073008, ENSG00000150593, ENSG00000130427, ENSG00000179750, ENSG00000117228, ENSG00000120937, ENSG0000…	411	1277	19277	1.43242	0.412892
GO TERM: BP	GO:0051145~smooth muscle cell differentiation	GO:0051145	smooth muscle cell differentiation	6	1.222	0.0229063	ENSG00000172638, ENSG00000168743, ENSG00000164683, ENSG00000184481, ENSG00000150593, ENSG00000100311	411	76	19277	3.70284	0.413562
GO TERM: BP	GO:0002009~morphogenesis of an epithelium	GO:0002009	morphogenesis of an epithelium	21	4.27699	0.0230941	ENSG00000161638, ENSG00000173991, ENSG00000205220, ENSG00000117139, ENSG00000204580, ENSG00000145536, ENSG00000168743, ENSG00000166145, ENSG00000175707, ENSG00000165730, ENSG00000128917, ENSG00000183098, ENSG00000143869, ENSG00000166341, ENSG00000149269, ENSG00000121075, ENSG00000128713, ENSG00000106031, ENSG00000145147, ENSG00000106078, ENSG00000074527	411	578	19277	1.70408	0.415621
GO TERM: CC	GO:0005902~microvillus	GO:0005902	microvillus	7	1.42566	0.0230993	ENSG00000099834, ENSG00000174827, ENSG00000155850, ENSG00000080031, ENSG00000182156, ENSG00000138823, ENSG00000127831	396	96	17223	3.17132	0.275305
GO TERM: BP	GO:2000147~positive regulation of cell motility	GO:2000147	positive regulation of cell motility	22	4.48065	0.0232245	ENSG00000158856, ENSG00000181104, ENSG00000161638, ENSG00000132669, ENSG00000107738, ENSG00000181284, ENSG00000136960, ENSG00000065534, ENSG00000115414, ENSG00000118257, ENSG00000082684, ENSG00000112293, ENSG00000113140, ENSG00000006210, ENSG00000184481, ENSG00000138772, ENSG00000164251, ENSG00000010319, ENSG00000149269, ENSG00000100311, ENSG00000165215, ENSG00000127831	411	615	19277	1.67782	0.416635
GO TERM: BP	GO:0045088~regulation of innate immune response	GO:0045088	regulation of innate immune response	19	3.86965	0.0233038	ENSG00000073008, ENSG00000173193, ENSG00000132109, ENSG00000149131, ENSG00000130768, ENSG00000135047, ENSG00000205220, ENSG00000173702, ENSG00000111331, ENSG00000204592, ENSG00000163131, ENSG00000158270, ENSG00000138496, ENSG00000206503, ENSG00000164251, ENSG00000089127, ENSG00000149269, ENSG00000164307, ENSG00000107201	411	503	19277	1.77167	0.416731
GO TERM: BP	GO:0051094~positive regulation of developmental process	GO:0051094	positive regulation of developmental process	45	9.16497	0.0235485	ENSG00000161638, ENSG00000173083, ENSG00000107738, ENSG00000134013, ENSG00000115414, ENSG00000119782, ENSG00000117139, ENSG00000099284, ENSG00000137642, ENSG00000166313, ENSG00000006210, ENSG00000138772, ENSG00000161642, ENSG00000163624, ENSG00000124253, ENSG00000147852, ENSG00000104881, ENSG00000124212, ENSG00000158856, ENSG00000111249, ENSG00000132669, ENSG00000146197, ENSG00000130427, ENSG0000…	411	1523	19277	1.38583	0.419774
GO TERM: BP	GO:0007009~plasma membrane organization	GO:0007009	plasma membrane organization	16	3.25866	0.02368	ENSG00000179841, ENSG00000105971, ENSG00000039068, ENSG00000104537, ENSG00000104419, ENSG00000117228, ENSG00000150551, ENSG00000170558, ENSG00000084710, ENSG00000174827, ENSG00000166341, ENSG00000143153, ENSG00000058668, ENSG00000095637, ENSG00000127831, ENSG00000161249	411	397	19277	1.89028	0.420788
GO TERM: BP	GO:0009967~positive regulation of signal transduction	GO:0009967	positive regulation of signal transduction	51	10.387	0.0244024	ENSG00000107731, ENSG00000181104, ENSG00000173083, ENSG00000150281, ENSG00000170775, ENSG00000128917, ENSG00000164251, ENSG00000137261, ENSG00000080293, ENSG00000150593, ENSG00000132109, ENSG00000179399, ENSG00000075461, ENSG00000168743, ENSG00000121858, ENSG00000143869, ENSG00000123999, ENSG00000167779, ENSG00000165953, ENSG00000105971, ENSG00000161638, ENSG00000205220, ENSG00000115414, ENSG0000…	411	1773	19277	1.34915	0.432261
GO TERM: BP	GO:0072593~reactive oxygen species metabolic process	GO:0072593	reactive oxygen species metabolic process	13	2.64766	0.0246374	ENSG00000106688, ENSG00000198743, ENSG00000110244, ENSG00000140092, ENSG00000116701, ENSG00000196139, ENSG00000164251, ENSG00000100311, ENSG00000058668, ENSG00000109610, ENSG00000188747, ENSG00000124212, ENSG00000145335	411	295	19277	2.0669	0.435055
GO TERM: MF	GO:0042608~T cell receptor binding	GO:0042608	T cell receptor binding	3	0.610998	0.024689	ENSG00000206503, ENSG00000160654, ENSG00000204592	381	11	16739	11.9821	0.393935
GO TERM: MF	GO:0016176~superoxide-generating NADPH oxidase activator activity	GO:0016176	superoxide-generating NADPH oxidase activator activity	3	0.610998	0.024689	ENSG00000116701, ENSG00000100311, ENSG00000188747	381	11	16739	11.9821	0.393935
GO TERM: MF	GO:0022890~inorganic cation transmembrane transporter activity	GO:0022890	inorganic cation transmembrane transporter activity	21	4.27699	0.0247007	ENSG00000106688, ENSG00000156222, ENSG00000130821, ENSG00000170482, ENSG00000198743, ENSG00000170175, ENSG00000075461, ENSG00000119782, ENSG00000171227, ENSG00000158865, ENSG00000135643, ENSG00000175938, ENSG00000120049, ENSG00000136052, ENSG00000143153, ENSG00000121361, ENSG00000187688, ENSG00000058668, ENSG00000108576, ENSG00000146039, ENSG00000148942	381	546	16739	1.68978	0.393935
GO TERM: MF	GO:0098772~molecular function regulator	GO:0098772	molecular function regulator	48	9.77597	0.0247801	ENSG00000127084, ENSG00000149131, ENSG00000107738, ENSG00000198743, ENSG00000110244, ENSG00000116701, ENSG00000115414, ENSG00000119782, ENSG00000135643, ENSG00000095383, ENSG00000146966, ENSG00000150938, ENSG00000142784, ENSG00000138496, ENSG00000008256, ENSG00000138772, ENSG00000157150, ENSG00000050165, ENSG00000100665, ENSG00000143153, ENSG00000058668, ENSG00000099937, ENSG00000055957, ENSG0000…	381	1551	16739	1.35967	0.393935
GO TERM: MF	GO:0016903~oxidoreductase activity, acting on the aldehyde or oxo group of donors	GO:0016903	oxidoreductase activity, acting on the aldehyde or oxo group of donors	5	1.01833	0.0248359	ENSG00000119711, ENSG00000118514, ENSG00000196139, ENSG00000131781, ENSG00000006534	381	49	16739	4.4831	0.393935
GO TERM: MF	GO:0016709~oxidoreductase activity, acting on paired donors, with incorporation or reduction of molecular oxygen, NAD(P)H as one donor, and incorporation of one atom of oxygen	GO:0016709	oxidoreductase activity, acting on paired donors, with incorporation or reduction of molecular oxygen, NAD(P)H as one donor, and incorporation of one atom of oxygen	5	1.01833	0.0248359	ENSG00000076258, ENSG00000010932, ENSG00000138109, ENSG00000196139, ENSG00000131781	381	49	16739	4.4831	0.393935
GO TERM: MF	GO:0070011~peptidase activity, acting on L-amino acid peptides	GO:0070011	peptidase activity, acting on L-amino acid peptides	24	4.88798	0.0253058	ENSG00000102174, ENSG00000158516, ENSG00000104324, ENSG00000256043, ENSG00000106624, ENSG00000106327, ENSG00000135047, ENSG00000205220, ENSG00000105707, ENSG00000115257, ENSG00000145536, ENSG00000163131, ENSG00000086205, ENSG00000117298, ENSG00000139178, ENSG00000166340, ENSG00000187045, ENSG00000135074, ENSG00000166825, ENSG00000164307, ENSG00000142910, ENSG00000072657, ENSG00000148702, ENSG0000…	381	653	16739	1.61474	0.395307
GO TERM: BP	GO:0031338~regulation of vesicle fusion	GO:0031338	regulation of vesicle fusion	4	0.814664	0.0253548	ENSG00000147003, ENSG00000167371, ENSG00000132881, ENSG00000145335	411	30	19277	6.25369	0.446324
GO TERM: BP	GO:0010631~epithelial cell migration	GO:0010631	epithelial cell migration	15	3.05499	0.0255545	ENSG00000132669, ENSG00000173482, ENSG00000136960, ENSG00000134013, ENSG00000118257, ENSG00000112293, ENSG00000113140, ENSG00000163430, ENSG00000138772, ENSG00000128917, ENSG00000108187, ENSG00000100311, ENSG00000058668, ENSG00000145147, ENSG00000127831	411	366	19277	1.92224	0.44698
GO TERM: BP	GO:0098656~anion transmembrane transport	GO:0098656	anion transmembrane transport	12	2.44399	0.025702	ENSG00000155850, ENSG00000112394, ENSG00000197142, ENSG00000106688, ENSG00000110090, ENSG00000109738, ENSG00000147003, ENSG00000099960, ENSG00000123643, ENSG00000151834, ENSG00000139209, ENSG00000148942	411	263	19277	2.14005	0.44698
GO TERM: BP	GO:0043255~regulation of carbohydrate biosynthetic process	GO:0043255	regulation of carbohydrate biosynthetic process	7	1.42566	0.0257298	ENSG00000142178, ENSG00000166741, ENSG00000219607, ENSG00000100311, ENSG00000095637, ENSG00000165953, ENSG00000145335	411	106	19277	3.09735	0.44698
GO TERM: BP	GO:0070493~thrombin-activated receptor signaling pathway	GO:0070493	thrombin-activated receptor signaling pathway	3	0.610998	0.0258682	ENSG00000181104, ENSG00000164251, ENSG00000145335	411	12	19277	11.7257	0.44698
GO TERM: BP	GO:0090209~negative regulation of triglyceride metabolic process	GO:0090209	negative regulation of triglyceride metabolic process	3	0.610998	0.0258682	ENSG00000112293, ENSG00000142178, ENSG00000137642	411	12	19277	11.7257	0.44698
GO TERM: BP	GO:0031340~positive regulation of vesicle fusion	GO:0031340	positive regulation of vesicle fusion	3	0.610998	0.0258682	ENSG00000147003, ENSG00000167371, ENSG00000145335	411	12	19277	11.7257	0.44698
GO TERM: BP	GO:0010632~regulation of epithelial cell migration	GO:0010632	regulation of epithelial cell migration	13	2.64766	0.0264026	ENSG00000132669, ENSG00000173482, ENSG00000136960, ENSG00000118257, ENSG00000112293, ENSG00000113140, ENSG00000138772, ENSG00000128917, ENSG00000108187, ENSG00000100311, ENSG00000058668, ENSG00000145147, ENSG00000127831	411	298	19277	2.04609	0.453507
GO TERM: BP	GO:1905477~positive regulation of protein localization to membrane	GO:1905477	positive regulation of protein localization to membrane	8	1.62933	0.0264069	ENSG00000179841, ENSG00000174827, ENSG00000104537, ENSG00000198743, ENSG00000149269, ENSG00000095637, ENSG00000058668, ENSG00000127831	411	136	19277	2.75898	0.453507
GO TERM: BP	GO:0048844~artery morphogenesis	GO:0048844	artery morphogenesis	6	1.222	0.0265559	ENSG00000172638, ENSG00000164683, ENSG00000128917, ENSG00000065534, ENSG00000106031, ENSG00000074181	411	79	19277	3.56223	0.454679
GO TERM: BP	GO:0032101~regulation of response to external stimulus	GO:0032101	regulation of response to external stimulus	36	7.33198	0.0266618	ENSG00000181104, ENSG00000173083, ENSG00000137869, ENSG00000149131, ENSG00000181284, ENSG00000119782, ENSG00000204592, ENSG00000021852, ENSG00000138496, ENSG00000006210, ENSG00000123843, ENSG00000205502, ENSG00000164251, ENSG00000137261, ENSG00000124875, ENSG00000162415, ENSG00000080293, ENSG00000160654, ENSG00000145335, ENSG00000124212, ENSG00000158856, ENSG00000150593, ENSG00000132703, ENSG0000…	411	1171	19277	1.44193	0.455109
GO TERM: BP	GO:1903076~regulation of protein localization to plasma membrane	GO:1903076	regulation of protein localization to plasma membrane	7	1.42566	0.0267887	ENSG00000179841, ENSG00000104537, ENSG00000095637, ENSG00000117228, ENSG00000058668, ENSG00000127831, ENSG00000150551	411	107	19277	3.0684	0.455894
GO TERM: BP	GO:0090132~epithelium migration	GO:0090132	epithelium migration	15	3.05499	0.0269896	ENSG00000132669, ENSG00000173482, ENSG00000136960, ENSG00000134013, ENSG00000118257, ENSG00000112293, ENSG00000113140, ENSG00000163430, ENSG00000138772, ENSG00000128917, ENSG00000108187, ENSG00000100311, ENSG00000058668, ENSG00000145147, ENSG00000127831	411	369	19277	1.90661	0.457929
GO TERM: CC	GO:0005923~bicellular tight junction	GO:0005923	bicellular tight junction	8	1.62933	0.027153	ENSG00000159261, ENSG00000008256, ENSG00000160593, ENSG00000114019, ENSG00000171992, ENSG00000116117, ENSG00000165215, ENSG00000107201	396	127	17223	2.73968	0.309467
GO TERM: CC	GO:0099503~secretory vesicle	GO:0099503	secretory vesicle	35	7.12831	0.0274532	ENSG00000105971, ENSG00000173083, ENSG00000174992, ENSG00000153395, ENSG00000149131, ENSG00000135047, ENSG00000116701, ENSG00000151834, ENSG00000115414, ENSG00000115257, ENSG00000189195, ENSG00000148180, ENSG00000006534, ENSG00000117298, ENSG00000140284, ENSG00000138772, ENSG00000078081, ENSG00000104081, ENSG00000100665, ENSG00000127329, ENSG00000179163, ENSG00000145730, ENSG00000145335, ENSG0000…	396	1051	17223	1.44837	0.309467
GO TERM: CC	GO:0005581~collagen trimer	GO:0005581	collagen trimer	7	1.42566	0.0275552	ENSG00000142156, ENSG00000158270, ENSG00000188153, ENSG00000111799, ENSG00000131094, ENSG00000049089, ENSG00000187955	396	100	17223	3.04447	0.309467
GO TERM: BP	GO:0045017~glycerolipid biosynthetic process	GO:0045017	glycerolipid biosynthetic process	12	2.44399	0.0276183	ENSG00000112293, ENSG00000103066, ENSG00000102230, ENSG00000142178, ENSG00000060642, ENSG00000169499, ENSG00000153395, ENSG00000163898, ENSG00000163624, ENSG00000100311, ENSG00000124253, ENSG00000143036	411	266	19277	2.11591	0.466153
GO TERM: BP	GO:0010669~epithelial structure maintenance	GO:0010669	epithelial structure maintenance	4	0.814664	0.0276398	ENSG00000160181, ENSG00000197375, ENSG00000108187, ENSG00000173702	411	31	19277	6.05196	0.466153
GO TERM: BP	GO:0060562~epithelial tube morphogenesis	GO:0060562	epithelial tube morphogenesis	14	2.85132	0.0278323	ENSG00000173991, ENSG00000117139, ENSG00000204580, ENSG00000145536, ENSG00000168743, ENSG00000166145, ENSG00000165730, ENSG00000128917, ENSG00000143869, ENSG00000166341, ENSG00000149269, ENSG00000128713, ENSG00000145147, ENSG00000106078	411	335	19277	1.96011	0.467998
GO TERM: BP	GO:0043065~positive regulation of apoptotic process	GO:0043065	positive regulation of apoptotic process	24	4.88798	0.0279646	ENSG00000181104, ENSG00000129521, ENSG00000106688, ENSG00000150593, ENSG00000127084, ENSG00000137831, ENSG00000006659, ENSG00000265972, ENSG00000196139, ENSG00000148180, ENSG00000240694, ENSG00000112293, ENSG00000142178, ENSG00000166313, ENSG00000077092, ENSG00000121858, ENSG00000120129, ENSG00000104081, ENSG00000106031, ENSG00000145147, ENSG00000104880, ENSG00000124212, ENSG00000181634, ENSG0000…	411	703	19277	1.60123	0.468823
GO TERM: BP	GO:0006766~vitamin metabolic process	GO:0006766	vitamin metabolic process	8	1.62933	0.0282972	ENSG00000166741, ENSG00000170482, ENSG00000145321, ENSG00000196139, ENSG00000014257, ENSG00000244474, ENSG00000059804, ENSG00000185339	411	138	19277	2.719	0.471592
GO TERM: BP	GO:0008286~insulin receptor signaling pathway	GO:0008286	insulin receptor signaling pathway	8	1.62933	0.0282972	ENSG00000112293, ENSG00000105971, ENSG00000184481, ENSG00000149269, ENSG00000095637, ENSG00000146678, ENSG00000137642, ENSG00000165953	411	138	19277	2.719	0.471592
GO TERM: BP	GO:1990778~protein localization to cell periphery	GO:1990778	protein localization to cell periphery	14	2.85132	0.0283986	ENSG00000179841, ENSG00000106688, ENSG00000039068, ENSG00000104537, ENSG00000117228, ENSG00000150551, ENSG00000170558, ENSG00000084710, ENSG00000174827, ENSG00000166341, ENSG00000143153, ENSG00000058668, ENSG00000095637, ENSG00000127831	411	336	19277	1.95428	0.471886
GO TERM: BP	GO:0003008~system process	GO:0003008	system process	63	12.831	0.028684	ENSG00000181104, ENSG00000106688, ENSG00000197375, ENSG00000149131, ENSG00000170175, ENSG00000065534, ENSG00000135643, ENSG00000145536, ENSG00000166313, ENSG00000117298, ENSG00000128917, ENSG00000164251, ENSG00000108187, ENSG00000121361, ENSG00000143153, ENSG00000072657, ENSG00000166833, ENSG00000167371, ENSG00000075461, ENSG00000105707, ENSG00000174469, ENSG00000168743, ENSG00000160181, ENSG0000…	411	2299	19277	1.28528	0.475226
GO TERM: BP	GO:0050767~regulation of neurogenesis	GO:0050767	regulation of neurogenesis	28	5.70265	0.0289011	ENSG00000204099, ENSG00000115414, ENSG00000119782, ENSG00000074181, ENSG00000137642, ENSG00000166313, ENSG00000006210, ENSG00000128917, ENSG00000137261, ENSG00000162415, ENSG00000147852, ENSG00000111249, ENSG00000130427, ENSG00000132003, ENSG00000082684, ENSG00000170558, ENSG00000136040, ENSG00000166145, ENSG00000164683, ENSG00000143869, ENSG00000010319, ENSG00000149269, ENSG00000187688, ENSG0000…	411	860	19277	1.52706	0.476797
GO TERM: BP	GO:0022617~extracellular matrix disassembly	GO:0022617	extracellular matrix disassembly	6	1.222	0.0291836	ENSG00000163131, ENSG00000187045, ENSG00000146197, ENSG00000135047, ENSG00000105707, ENSG00000163346	411	81	19277	3.47427	0.476797
GO TERM: BP	GO:0010565~regulation of cellular ketone metabolic process	GO:0010565	regulation of cellular ketone metabolic process	10	2.03666	0.0293301	ENSG00000142784, ENSG00000110090, ENSG00000050165, ENSG00000110244, ENSG00000205220, ENSG00000058668, ENSG00000196139, ENSG00000089163, ENSG00000244474, ENSG00000145335	411	202	19277	2.32191	0.476797
GO TERM: BP	GO:0043901~negative regulation of multi-organism process	GO:0043901	negative regulation of multi-organism process	10	2.03666	0.0293301	ENSG00000244509, ENSG00000132109, ENSG00000132703, ENSG00000174992, ENSG00000089127, ENSG00000179750, ENSG00000185201, ENSG00000008517, ENSG00000148180, ENSG00000111331	411	202	19277	2.32191	0.476797
GO TERM: BP	GO:0008217~regulation of blood pressure	GO:0008217	regulation of blood pressure	10	2.03666	0.0293301	ENSG00000145536, ENSG00000181104, ENSG00000117298, ENSG00000164251, ENSG00000166825, ENSG00000164307, ENSG00000100311, ENSG00000120937, ENSG00000072657, ENSG00000166833	411	202	19277	2.32191	0.476797
GO TERM: BP	GO:0003179~heart valve morphogenesis	GO:0003179	heart valve morphogenesis	5	1.01833	0.0293713	ENSG00000164683, ENSG00000128917, ENSG00000166341, ENSG00000145147, ENSG00000185008	411	55	19277	4.26388	0.476797
GO TERM: BP	GO:0001706~endoderm formation	GO:0001706	endoderm formation	5	1.01833	0.0293713	ENSG00000142156, ENSG00000161638, ENSG00000111799, ENSG00000120129, ENSG00000115414	411	55	19277	4.26388	0.476797
GO TERM: BP	GO:0051272~positive regulation of cellular component movement	GO:0051272	positive regulation of cellular component movement	22	4.48065	0.0298513	ENSG00000158856, ENSG00000181104, ENSG00000161638, ENSG00000132669, ENSG00000107738, ENSG00000181284, ENSG00000136960, ENSG00000065534, ENSG00000115414, ENSG00000118257, ENSG00000082684, ENSG00000112293, ENSG00000113140, ENSG00000006210, ENSG00000184481, ENSG00000138772, ENSG00000164251, ENSG00000010319, ENSG00000149269, ENSG00000100311, ENSG00000165215, ENSG00000127831	411	632	19277	1.63269	0.479724
GO TERM: BP	GO:0042060~wound healing	GO:0042060	wound healing	22	4.48065	0.0298513	ENSG00000158856, ENSG00000181104, ENSG00000161638, ENSG00000104324, ENSG00000173083, ENSG00000132703, ENSG00000149131, ENSG00000065534, ENSG00000115414, ENSG00000148180, ENSG00000204580, ENSG00000113140, ENSG00000006210, ENSG00000118898, ENSG00000160593, ENSG00000123843, ENSG00000164251, ENSG00000149269, ENSG00000100311, ENSG00000099937, ENSG00000165215, ENSG00000146678	411	632	19277	1.63269	0.479724
GO TERM: BP	GO:0003180~aortic valve morphogenesis	GO:0003180	aortic valve morphogenesis	4	0.814664	0.0300308	ENSG00000164683, ENSG00000128917, ENSG00000145147, ENSG00000185008	411	32	19277	5.86283	0.479724
GO TERM: BP	GO:0034219~carbohydrate transmembrane transport	GO:0034219	carbohydrate transmembrane transport	4	0.814664	0.0300308	ENSG00000173262, ENSG00000198743, ENSG00000158865, ENSG00000059804	411	32	19277	5.86283	0.479724
GO TERM: BP	GO:0007626~locomotory behavior	GO:0007626	locomotory behavior	10	2.03666	0.0300793	ENSG00000174938, ENSG00000106688, ENSG00000131094, ENSG00000109738, ENSG00000161642, ENSG00000153902, ENSG00000046889, ENSG00000166833, ENSG00000170775, ENSG00000145335	411	203	19277	2.31048	0.479724
GO TERM: BP	GO:0003073~regulation of systemic arterial blood pressure	GO:0003073	regulation of systemic arterial blood pressure	7	1.42566	0.0301373	ENSG00000145536, ENSG00000181104, ENSG00000117298, ENSG00000164251, ENSG00000100311, ENSG00000120937, ENSG00000166833	411	110	19277	2.98472	0.479724
GO TERM: BP	GO:0015791~polyol transport	GO:0015791	polyol transport	3	0.610998	0.0301477	ENSG00000198743, ENSG00000143595, ENSG00000158865	411	13	19277	10.8237	0.479724
GO TERM: BP	GO:0080134~regulation of response to stress	GO:0080134	regulation of response to stress	55	11.2016	0.0303003	ENSG00000181104, ENSG00000173083, ENSG00000137869, ENSG00000149131, ENSG00000135047, ENSG00000065534, ENSG00000204592, ENSG00000170775, ENSG00000166313, ENSG00000164251, ENSG00000137261, ENSG00000124875, ENSG00000080293, ENSG00000160654, ENSG00000145335, ENSG00000073008, ENSG00000150593, ENSG00000132703, ENSG00000132109, ENSG00000130768, ENSG00000152137, ENSG00000163131, ENSG00000158270, ENSG0000…	411	1967	19277	1.31146	0.480794
GO TERM: BP	GO:0090130~tissue migration	GO:0090130	tissue migration	15	3.05499	0.0306078	ENSG00000132669, ENSG00000173482, ENSG00000136960, ENSG00000134013, ENSG00000118257, ENSG00000112293, ENSG00000113140, ENSG00000163430, ENSG00000138772, ENSG00000128917, ENSG00000108187, ENSG00000100311, ENSG00000058668, ENSG00000145147, ENSG00000127831	411	375	19277	1.87611	0.484309
GO TERM: BP	GO:0043068~positive regulation of programmed cell death	GO:0043068	positive regulation of programmed cell death	24	4.88798	0.0310693	ENSG00000181104, ENSG00000129521, ENSG00000106688, ENSG00000150593, ENSG00000127084, ENSG00000137831, ENSG00000006659, ENSG00000265972, ENSG00000196139, ENSG00000148180, ENSG00000240694, ENSG00000112293, ENSG00000142178, ENSG00000166313, ENSG00000077092, ENSG00000121858, ENSG00000120129, ENSG00000104081, ENSG00000106031, ENSG00000145147, ENSG00000104880, ENSG00000124212, ENSG00000181634, ENSG0000…	411	711	19277	1.58321	0.488419
GO TERM: CC	GO:0030141~secretory granule	GO:0030141	secretory granule	30	6.10998	0.0312044	ENSG00000105971, ENSG00000173083, ENSG00000174992, ENSG00000153395, ENSG00000149131, ENSG00000135047, ENSG00000116701, ENSG00000115414, ENSG00000115257, ENSG00000148180, ENSG00000006534, ENSG00000117298, ENSG00000140284, ENSG00000138772, ENSG00000078081, ENSG00000104081, ENSG00000100665, ENSG00000127329, ENSG00000179163, ENSG00000145730, ENSG00000145335, ENSG00000108679, ENSG00000113140, ENSG0000…	396	878	17223	1.48607	0.343837
GO TERM: BP	GO:0044057~regulation of system process	GO:0044057	regulation of system process	21	4.27699	0.0312179	ENSG00000105048, ENSG00000181104, ENSG00000106688, ENSG00000197375, ENSG00000110244, ENSG00000075461, ENSG00000119782, ENSG00000120937, ENSG00000135643, ENSG00000168743, ENSG00000160181, ENSG00000117298, ENSG00000120049, ENSG00000164251, ENSG00000123999, ENSG00000149269, ENSG00000143153, ENSG00000182156, ENSG00000100311, ENSG00000058668, ENSG00000014257	411	597	19277	1.64984	0.488419
GO TERM: BP	GO:0030534~adult behavior	GO:0030534	adult behavior	8	1.62933	0.0313011	ENSG00000174938, ENSG00000106688, ENSG00000109738, ENSG00000170175, ENSG00000153902, ENSG00000046889, ENSG00000145335, ENSG00000174469	411	141	19277	2.66114	0.488419
GO TERM: BP	GO:0014065~phosphatidylinositol 3-kinase signaling	GO:0014065	phosphatidylinositol 3-kinase signaling	8	1.62933	0.0313011	ENSG00000107731, ENSG00000181104, ENSG00000164251, ENSG00000130427, ENSG00000100311, ENSG00000115414, ENSG00000046889, ENSG00000165953	411	141	19277	2.66114	0.488419
GO TERM: BP	GO:0043280~positive regulation of cysteine-type endopeptidase activity involved in apoptotic process	GO:0043280	positive regulation of cysteine-type endopeptidase activity involved in apoptotic process	8	1.62933	0.0313011	ENSG00000181104, ENSG00000129521, ENSG00000106688, ENSG00000121858, ENSG00000137831, ENSG00000148180, ENSG00000145335, ENSG00000181634	411	141	19277	2.66114	0.488419
GO TERM: BP	GO:0035239~tube morphogenesis	GO:0035239	tube morphogenesis	15	3.05499	0.031962	ENSG00000173991, ENSG00000117139, ENSG00000204580, ENSG00000145536, ENSG00000168743, ENSG00000166145, ENSG00000165730, ENSG00000128917, ENSG00000143869, ENSG00000166341, ENSG00000149269, ENSG00000128713, ENSG00000106031, ENSG00000145147, ENSG00000106078	411	377	19277	1.86615	0.497354
GO TERM: BP	GO:0050920~regulation of chemotaxis	GO:0050920	regulation of chemotaxis	11	2.24033	0.0324201	ENSG00000082684, ENSG00000137869, ENSG00000120129, ENSG00000164251, ENSG00000181284, ENSG00000010319, ENSG00000162415, ENSG00000100311, ENSG00000145147, ENSG00000185008, ENSG00000132003	411	239	19277	2.1587	0.501988
GO TERM: BP	GO:0071711~basement membrane organization	GO:0071711	basement membrane organization	4	0.814664	0.0325272	ENSG00000163131, ENSG00000105971, ENSG00000105707, ENSG00000074527	411	33	19277	5.68517	0.501988
GO TERM: BP	GO:0030149~sphingolipid catabolic process	GO:0030149	sphingolipid catabolic process	4	0.814664	0.0325272	ENSG00000130768, ENSG00000204099, ENSG00000136960, ENSG00000182156	411	33	19277	5.68517	0.501988
GO TERM: MF	GO:0071813~lipoprotein particle binding	GO:0071813	lipoprotein particle binding	4	0.814664	0.0326246	ENSG00000158270, ENSG00000132703, ENSG00000147852, ENSG00000137642	381	31	16739	5.66895	0.48273
GO TERM: MF	GO:0005343~organic acid:sodium symporter activity	GO:0005343	organic acid:sodium symporter activity	4	0.814664	0.0326246	ENSG00000106688, ENSG00000130821, ENSG00000170482, ENSG00000148942	381	31	16739	5.66895	0.48273
GO TERM: MF	GO:0071814~protein-lipid complex binding	GO:0071814	protein-lipid complex binding	4	0.814664	0.0326246	ENSG00000158270, ENSG00000132703, ENSG00000147852, ENSG00000137642	381	31	16739	5.66895	0.48273
GO TERM: BP	GO:0034765~regulation of ion transmembrane transport	GO:0034765	regulation of ion transmembrane transport	19	3.86965	0.0327297	ENSG00000181104, ENSG00000197142, ENSG00000130427, ENSG00000075461, ENSG00000119782, ENSG00000114796, ENSG00000171227, ENSG00000135643, ENSG00000163131, ENSG00000174827, ENSG00000006210, ENSG00000120049, ENSG00000117262, ENSG00000118507, ENSG00000147003, ENSG00000143153, ENSG00000121361, ENSG00000058668, ENSG00000145335	411	525	19277	1.69743	0.503734
GO TERM: MF	GO:0005178~integrin binding	GO:0005178	integrin binding	9	1.83299	0.0327751	ENSG00000168743, ENSG00000161638, ENSG00000006210, ENSG00000079112, ENSG00000166147, ENSG00000106823, ENSG00000160593, ENSG00000140092, ENSG00000115414	381	163	16739	2.42582	0.48273
GO TERM: BP	GO:0071705~nitrogen compound transport	GO:0071705	nitrogen compound transport	64	13.0346	0.0329209	ENSG00000214357, ENSG00000181104, ENSG00000173083, ENSG00000106688, ENSG00000156222, ENSG00000175662, ENSG00000197375, ENSG00000106327, ENSG00000107819, ENSG00000139209, ENSG00000261582, ENSG00000095383, ENSG00000084731, ENSG00000166313, ENSG00000137463, ENSG00000164251, ENSG00000137261, ENSG00000108187, ENSG00000143153, ENSG00000143595, ENSG00000145730, ENSG00000160654, ENSG00000143036, ENSG0000…	411	2358	19277	1.27302	0.505295
GO TERM: BP	GO:0016053~organic acid biosynthetic process	GO:0016053	organic acid biosynthetic process	14	2.85132	0.033194	ENSG00000110244, ENSG00000138109, ENSG00000136881, ENSG00000196139, ENSG00000152952, ENSG00000138115, ENSG00000142784, ENSG00000140284, ENSG00000118514, ENSG00000008311, ENSG00000163898, ENSG00000058668, ENSG00000143320, ENSG00000124212	411	343	19277	1.91439	0.506726
GO TERM: BP	GO:0046394~carboxylic acid biosynthetic process	GO:0046394	carboxylic acid biosynthetic process	14	2.85132	0.033194	ENSG00000110244, ENSG00000138109, ENSG00000136881, ENSG00000196139, ENSG00000152952, ENSG00000138115, ENSG00000142784, ENSG00000140284, ENSG00000118514, ENSG00000008311, ENSG00000163898, ENSG00000058668, ENSG00000143320, ENSG00000124212	411	343	19277	1.91439	0.506726
GO TERM: BP	GO:0072073~kidney epithelium development	GO:0072073	kidney epithelium development	8	1.62933	0.0334184	ENSG00000145536, ENSG00000147869, ENSG00000168743, ENSG00000077092, ENSG00000166341, ENSG00000128713, ENSG00000145147, ENSG00000185008	411	143	19277	2.62393	0.508773
GO TERM: BP	GO:0001523~retinoid metabolic process	GO:0001523	retinoid metabolic process	7	1.42566	0.033749	ENSG00000118514, ENSG00000183098, ENSG00000179399, ENSG00000110244, ENSG00000196139, ENSG00000143320, ENSG00000138115	411	113	19277	2.90548	0.512421
GO TERM: BP	GO:0006665~sphingolipid metabolic process	GO:0006665	sphingolipid metabolic process	9	1.83299	0.0339249	ENSG00000103066, ENSG00000128242, ENSG00000130768, ENSG00000115525, ENSG00000204099, ENSG00000136960, ENSG00000182156, ENSG00000168528, ENSG00000006534	411	175	19277	2.41214	0.512921
GO TERM: BP	GO:0006952~defense response	GO:0006952	defense response	58	11.8126	0.0339641	ENSG00000181104, ENSG00000106688, ENSG00000137869, ENSG00000106327, ENSG00000149131, ENSG00000135047, ENSG00000204592, ENSG00000164251, ENSG00000121361, ENSG00000124875, ENSG00000080293, ENSG00000160654, ENSG00000145335, ENSG00000073008, ENSG00000150593, ENSG00000132703, ENSG00000132109, ENSG00000130768, ENSG00000179750, ENSG00000150551, ENSG00000163131, ENSG00000158270, ENSG00000139178, ENSG0000…	411	2107	19277	1.2911	0.512921
GO TERM: MF	GO:0015166~polyol transmembrane transporter activity	GO:0015166	polyol transmembrane transporter activity	3	0.610998	0.0339858	ENSG00000198743, ENSG00000143595, ENSG00000158865	381	13	16739	10.1387	0.482814
GO TERM: MF	GO:0015665~alcohol transmembrane transporter activity	GO:0015665	alcohol transmembrane transporter activity	3	0.610998	0.0339858	ENSG00000198743, ENSG00000143595, ENSG00000158865	381	13	16739	10.1387	0.482814
GO TERM: MF	GO:0003714~transcription corepressor activity	GO:0003714	transcription corepressor activity	10	2.03666	0.0341857	ENSG00000065717, ENSG00000138496, ENSG00000173193, ENSG00000008311, ENSG00000167771, ENSG00000103316, ENSG00000153814, ENSG00000117139, ENSG00000163346, ENSG00000104881	381	195	16739	2.25305	0.482814
GO TERM: CC	GO:0045211~postsynaptic membrane	GO:0045211	postsynaptic membrane	13	2.64766	0.0342985	ENSG00000180720, ENSG00000181104, ENSG00000106976, ENSG00000109738, ENSG00000167371, ENSG00000170175, ENSG00000075461, ENSG00000151834, ENSG00000113100, ENSG00000118257, ENSG00000170558, ENSG00000166313, ENSG00000108576	396	288	17223	1.9632	0.370932
GO TERM: BP	GO:0051607~defense response to virus	GO:0051607	defense response to virus	13	2.64766	0.0345211	ENSG00000244509, ENSG00000179750, ENSG00000117228, ENSG00000117226, ENSG00000111331, ENSG00000138496, ENSG00000056972, ENSG00000164251, ENSG00000089127, ENSG00000119917, ENSG00000185201, ENSG00000121361, ENSG00000107201	411	310	19277	1.96689	0.518262
GO TERM: BP	GO:0010896~regulation of triglyceride catabolic process	GO:0010896	regulation of triglyceride catabolic process	3	0.610998	0.0346857	ENSG00000112293, ENSG00000110244, ENSG00000137642	411	14	19277	10.0506	0.518262
GO TERM: BP	GO:0016322~neuron remodeling	GO:0016322	neuron remodeling	3	0.610998	0.0346857	ENSG00000006210, ENSG00000131094, ENSG00000074527	411	14	19277	10.0506	0.518262
GO TERM: BP	GO:0034356~NAD biosynthesis via nicotinamide riboside salvage pathway	GO:0034356	NAD biosynthesis via nicotinamide riboside salvage pathway	3	0.610998	0.0346857	ENSG00000138496, ENSG00000166741, ENSG00000124212	411	14	19277	10.0506	0.518262
GO TERM: BP	GO:0071417~cellular response to organonitrogen compound	GO:0071417	cellular response to organonitrogen compound	22	4.48065	0.0348905	ENSG00000158856, ENSG00000105971, ENSG00000106688, ENSG00000039068, ENSG00000137642, ENSG00000156711, ENSG00000112293, ENSG00000142784, ENSG00000142156, ENSG00000184481, ENSG00000137463, ENSG00000166147, ENSG00000118507, ENSG00000149269, ENSG00000058668, ENSG00000095637, ENSG00000108576, ENSG00000145147, ENSG00000124253, ENSG00000146678, ENSG00000165953, ENSG00000145335	411	643	19277	1.60476	0.519366
GO TERM: BP	GO:0061387~regulation of extent of cell growth	GO:0061387	regulation of extent of cell growth	7	1.42566	0.0350125	ENSG00000082684, ENSG00000137261, ENSG00000010319, ENSG00000149269, ENSG00000187688, ENSG00000115414, ENSG00000143320	411	114	19277	2.87999	0.519366
GO TERM: BP	GO:0042573~retinoic acid metabolic process	GO:0042573	retinoic acid metabolic process	4	0.814664	0.0351284	ENSG00000118514, ENSG00000196139, ENSG00000143320, ENSG00000138115	411	34	19277	5.51796	0.519366
GO TERM: BP	GO:0035909~aorta morphogenesis	GO:0035909	aorta morphogenesis	4	0.814664	0.0351284	ENSG00000172638, ENSG00000164683, ENSG00000128917, ENSG00000065534	411	34	19277	5.51796	0.519366
GO TERM: CC	GO:0005794~Golgi apparatus	GO:0005794	Golgi apparatus	50	10.1833	0.0354026	ENSG00000181104, ENSG00000153395, ENSG00000135047, ENSG00000204592, ENSG00000167080, ENSG00000008256, ENSG00000165861, ENSG00000183098, ENSG00000164251, ENSG00000145730, ENSG00000145335, ENSG00000128242, ENSG00000179399, ENSG00000174469, ENSG00000162645, ENSG00000182156, ENSG00000128965, ENSG00000167779, ENSG00000105971, ENSG00000161638, ENSG00000154265, ENSG00000104324, ENSG00000127084, ENSG0000…	396	1649	17223	1.31875	0.375911
GO TERM: MF	GO:0051183~vitamin transporter activity	GO:0051183	vitamin transporter activity	4	0.814664	0.0354111	ENSG00000173262, ENSG00000170482, ENSG00000145321, ENSG00000059804	381	32	16739	5.4918	0.493362
GO TERM: BP	GO:0006650~glycerophospholipid metabolic process	GO:0006650	glycerophospholipid metabolic process	14	2.85132	0.0354232	ENSG00000103066, ENSG00000102230, ENSG00000153395, ENSG00000136960, ENSG00000110244, ENSG00000112293, ENSG00000084710, ENSG00000060642, ENSG00000169499, ENSG00000163898, ENSG00000163624, ENSG00000100311, ENSG00000168528, ENSG00000143036	411	347	19277	1.89233	0.522354
GO TERM: BP	GO:0008283~cell proliferation	GO:0008283	cell proliferation	56	11.4053	0.0356046	ENSG00000181104, ENSG00000173083, ENSG00000065970, ENSG00000173482, ENSG00000107738, ENSG00000197410, ENSG00000150281, ENSG00000117139, ENSG00000204592, ENSG00000128917, ENSG00000164251, ENSG00000108187, ENSG00000150593, ENSG00000153902, ENSG00000104419, ENSG00000105707, ENSG00000204580, ENSG00000174469, ENSG00000147869, ENSG00000172638, ENSG00000186790, ENSG00000175707, ENSG00000120129, ENSG0000…	411	2027	19277	1.29578	0.523657
GO TERM: BP	GO:0055114~oxidation-reduction process	GO:0055114	oxidation-reduction process	19	3.86965	0.0357949	ENSG00000219607, ENSG00000072682, ENSG00000137869, ENSG00000111674, ENSG00000110244, ENSG00000134013, ENSG00000044446, ENSG00000116701, ENSG00000138109, ENSG00000131781, ENSG00000138115, ENSG00000138131, ENSG00000140284, ENSG00000089127, ENSG00000110090, ENSG00000095637, ENSG00000010932, ENSG00000089163, ENSG00000145335	411	530	19277	1.68142	0.525086
GO TERM: CC	GO:0070160~occluding junction	GO:0070160	occluding junction	8	1.62933	0.0361218	ENSG00000159261, ENSG00000008256, ENSG00000160593, ENSG00000114019, ENSG00000171992, ENSG00000116117, ENSG00000165215, ENSG00000107201	396	135	17223	2.57733	0.376699
GO TERM: BP	GO:0043542~endothelial cell migration	GO:0043542	endothelial cell migration	12	2.44399	0.0362911	ENSG00000113140, ENSG00000112293, ENSG00000163430, ENSG00000138772, ENSG00000132669, ENSG00000128917, ENSG00000173482, ENSG00000134013, ENSG00000100311, ENSG00000058668, ENSG00000145147, ENSG00000118257	411	278	19277	2.02458	0.530981
GO TERM: BP	GO:0006022~aminoglycan metabolic process	GO:0006022	aminoglycan metabolic process	9	1.83299	0.0369399	ENSG00000173083, ENSG00000183098, ENSG00000161031, ENSG00000179399, ENSG00000237172, ENSG00000100311, ENSG00000179163, ENSG00000055957, ENSG00000156966	411	178	19277	2.37148	0.538871
GO TERM: BP	GO:0001932~regulation of protein phosphorylation	GO:0001932	regulation of protein phosphorylation	44	8.9613	0.0370217	ENSG00000105971, ENSG00000161638, ENSG00000181104, ENSG00000064042, ENSG00000106688, ENSG00000155792, ENSG00000150281, ENSG00000181284, ENSG00000115414, ENSG00000116985, ENSG00000139269, ENSG00000137642, ENSG00000170775, ENSG00000138496, ENSG00000006210, ENSG00000080031, ENSG00000164251, ENSG00000108187, ENSG00000127329, ENSG00000058668, ENSG00000147852, ENSG00000145335, ENSG00000181634, ENSG0000…	411	1530	19277	1.34884	0.538871
GO TERM: MF	GO:0042277~peptide binding	GO:0042277	peptide binding	14	2.85132	0.0371156	ENSG00000204592, ENSG00000137642, ENSG00000170775, ENSG00000086205, ENSG00000231925, ENSG00000117298, ENSG00000166313, ENSG00000120049, ENSG00000166340, ENSG00000206503, ENSG00000166825, ENSG00000164307, ENSG00000072657, ENSG00000080293	381	328	16739	1.87525	0.508398
GO TERM: BP	GO:0040007~growth	GO:0040007	growth	30	6.10998	0.0374072	ENSG00000104324, ENSG00000137869, ENSG00000115414, ENSG00000117139, ENSG00000148180, ENSG00000118257, ENSG00000150938, ENSG00000142784, ENSG00000166313, ENSG00000077092, ENSG00000137261, ENSG00000104881, ENSG00000169231, ENSG00000140092, ENSG00000120937, ENSG00000105707, ENSG00000204580, ENSG00000147869, ENSG00000082684, ENSG00000175707, ENSG00000055163, ENSG00000010319, ENSG00000149269, ENSG0000…	411	959	19277	1.46724	0.543079
GO TERM: MF	GO:0008233~peptidase activity	GO:0008233	peptidase activity	24	4.88798	0.0374765	ENSG00000102174, ENSG00000158516, ENSG00000104324, ENSG00000256043, ENSG00000106624, ENSG00000106327, ENSG00000135047, ENSG00000205220, ENSG00000105707, ENSG00000115257, ENSG00000145536, ENSG00000163131, ENSG00000086205, ENSG00000117298, ENSG00000139178, ENSG00000166340, ENSG00000187045, ENSG00000135074, ENSG00000166825, ENSG00000164307, ENSG00000142910, ENSG00000072657, ENSG00000148702, ENSG0000…	381	680	16739	1.55063	0.508398
GO TERM: BP	GO:0006664~glycolipid metabolic process	GO:0006664	glycolipid metabolic process	7	1.42566	0.0376298	ENSG00000112293, ENSG00000128242, ENSG00000060642, ENSG00000115525, ENSG00000204099, ENSG00000182156, ENSG00000179163	411	116	19277	2.83033	0.544332
GO TERM: BP	GO:0010648~negative regulation of cell communication	GO:0010648	negative regulation of cell communication	44	8.9613	0.0378156	ENSG00000105971, ENSG00000107731, ENSG00000155792, ENSG00000205220, ENSG00000119782, ENSG00000111331, ENSG00000074181, ENSG00000137642, ENSG00000150938, ENSG00000006210, ENSG00000128917, ENSG00000089127, ENSG00000164251, ENSG00000108187, ENSG00000161642, ENSG00000050165, ENSG00000122870, ENSG00000058668, ENSG00000089163, ENSG00000145335, ENSG00000173193, ENSG00000150593, ENSG00000106976, ENSG0000…	411	1535	19277	1.34444	0.544332
GO TERM: BP	GO:1905476~negative regulation of protein localization to membrane	GO:1905476	negative regulation of protein localization to membrane	4	0.814664	0.0378338	ENSG00000158856, ENSG00000104537, ENSG00000117228, ENSG00000150551	411	35	19277	5.36031	0.544332
GO TERM: BP	GO:0048015~phosphatidylinositol-mediated signaling	GO:0048015	phosphatidylinositol-mediated signaling	9	1.83299	0.0379835	ENSG00000107731, ENSG00000181104, ENSG00000164251, ENSG00000130427, ENSG00000100311, ENSG00000115414, ENSG00000148180, ENSG00000046889, ENSG00000165953	411	179	19277	2.35824	0.544332
GO TERM: MF	GO:0043168~anion binding	GO:0043168	anion binding	82	16.7006	0.0379976	ENSG00000129521, ENSG00000156587, ENSG00000106688, ENSG00000175662, ENSG00000197375, ENSG00000065534, ENSG00000188060, ENSG00000084731, ENSG00000140284, ENSG00000008256, ENSG00000165861, ENSG00000121361, ENSG00000124875, ENSG00000145730, ENSG00000099937, ENSG00000166833, ENSG00000145335, ENSG00000102230, ENSG00000104537, ENSG00000169231, ENSG00000173213, ENSG00000113249, ENSG00000116117, ENSG0000…	381	2962	16739	1.21628	0.508773
GO TERM: BP	GO:0045913~positive regulation of carbohydrate metabolic process	GO:0045913	positive regulation of carbohydrate metabolic process	6	1.222	0.0380273	ENSG00000112293, ENSG00000166741, ENSG00000219607, ENSG00000100311, ENSG00000095637, ENSG00000145335	411	87	19277	3.23467	0.544332
GO TERM: BP	GO:0006796~phosphate-containing compound metabolic process	GO:0006796	phosphate-containing compound metabolic process	89	18.1263	0.0380733	ENSG00000181104, ENSG00000155850, ENSG00000064042, ENSG00000106688, ENSG00000153395, ENSG00000173482, ENSG00000150281, ENSG00000111674, ENSG00000065534, ENSG00000170775, ENSG00000060642, ENSG00000165861, ENSG00000164251, ENSG00000108187, ENSG00000143153, ENSG00000143036, ENSG00000145335, ENSG00000102230, ENSG00000150593, ENSG00000130768, ENSG00000131370, ENSG00000204580, ENSG00000133597, ENSG0000…	411	3463	19277	1.20541	0.544332
GO TERM: BP	GO:0010721~negative regulation of cell development	GO:0010721	negative regulation of cell development	14	2.85132	0.0383176	ENSG00000158856, ENSG00000204099, ENSG00000117228, ENSG00000074181, ENSG00000137642, ENSG00000082684, ENSG00000164683, ENSG00000006210, ENSG00000166147, ENSG00000137261, ENSG00000010319, ENSG00000149269, ENSG00000108576, ENSG00000145147	411	351	19277	1.87076	0.546439
GO TERM: CC	GO:0044297~cell body	GO:0044297	cell body	23	4.68432	0.0386803	ENSG00000106688, ENSG00000130427, ENSG00000111674, ENSG00000075461, ENSG00000151834, ENSG00000105707, ENSG00000171992, ENSG00000114796, ENSG00000189195, ENSG00000137642, ENSG00000174469, ENSG00000174938, ENSG00000166313, ENSG00000006210, ENSG00000138772, ENSG00000123999, ENSG00000166165, ENSG00000161642, ENSG00000187688, ENSG00000106078, ENSG00000145730, ENSG00000059804, ENSG00000145335	396	639	17223	1.56546	0.38879
GO TERM: BP	GO:1903509~liposaccharide metabolic process	GO:1903509	liposaccharide metabolic process	7	1.42566	0.0389841	ENSG00000112293, ENSG00000128242, ENSG00000060642, ENSG00000115525, ENSG00000204099, ENSG00000182156, ENSG00000179163	411	117	19277	2.80614	0.554539
GO TERM: CC	GO:0044433~cytoplasmic vesicle part	GO:0044433	cytoplasmic vesicle part	48	9.77597	0.0390277	ENSG00000105971, ENSG00000154265, ENSG00000173083, ENSG00000106688, ENSG00000174992, ENSG00000153395, ENSG00000149131, ENSG00000135047, ENSG00000151834, ENSG00000115414, ENSG00000115257, ENSG00000148180, ENSG00000115255, ENSG00000204592, ENSG00000137642, ENSG00000006534, ENSG00000117298, ENSG00000140284, ENSG00000138772, ENSG00000078081, ENSG00000005243, ENSG00000137261, ENSG00000100665, ENSG0000…	396	1580	17223	1.32129	0.38879
GO TERM: CC	GO:0016323~basolateral plasma membrane	GO:0016323	basolateral plasma membrane	12	2.44399	0.0392784	ENSG00000170558, ENSG00000134538, ENSG00000112394, ENSG00000079112, ENSG00000170482, ENSG00000104537, ENSG00000143153, ENSG00000138823, ENSG00000152779, ENSG00000100311, ENSG00000058668, ENSG00000143595	396	261	17223	1.99965	0.38879
GO TERM: BP	GO:0035581~sequestering of extracellular ligand from receptor	GO:0035581	sequestering of extracellular ligand from receptor	3	0.610998	0.0394693	ENSG00000147869, ENSG00000163430, ENSG00000166147	411	15	19277	9.38054	0.559491
GO TERM: BP	GO:0023057~negative regulation of signaling	GO:0023057	negative regulation of signaling	44	8.9613	0.0395309	ENSG00000105971, ENSG00000107731, ENSG00000155792, ENSG00000205220, ENSG00000119782, ENSG00000111331, ENSG00000074181, ENSG00000137642, ENSG00000150938, ENSG00000006210, ENSG00000128917, ENSG00000089127, ENSG00000164251, ENSG00000108187, ENSG00000161642, ENSG00000050165, ENSG00000122870, ENSG00000058668, ENSG00000089163, ENSG00000145335, ENSG00000173193, ENSG00000150593, ENSG00000106976, ENSG0000…	411	1539	19277	1.34095	0.559491
GO TERM: BP	GO:2000116~regulation of cysteine-type endopeptidase activity	GO:2000116	regulation of cysteine-type endopeptidase activity	11	2.24033	0.0401401	ENSG00000181104, ENSG00000129521, ENSG00000055163, ENSG00000106688, ENSG00000078081, ENSG00000121858, ENSG00000137831, ENSG00000127831, ENSG00000148180, ENSG00000145335, ENSG00000181634	411	248	19277	2.08036	0.56669
GO TERM: BP	GO:0006720~isoprenoid metabolic process	GO:0006720	isoprenoid metabolic process	8	1.62933	0.0403356	ENSG00000118514, ENSG00000183098, ENSG00000179399, ENSG00000110244, ENSG00000138109, ENSG00000196139, ENSG00000143320, ENSG00000138115	411	149	19277	2.51826	0.568026
GO TERM: CC	GO:0055037~recycling endosome	GO:0055037	recycling endosome	10	2.03666	0.0404814	ENSG00000179841, ENSG00000253313, ENSG00000106688, ENSG00000166340, ENSG00000206503, ENSG00000167552, ENSG00000114019, ENSG00000104419, ENSG00000204592, ENSG00000137642	396	199	17223	2.18555	0.394019
GO TERM: BP	GO:1902284~neuron projection extension involved in neuron projection guidance	GO:1902284	neuron projection extension involved in neuron projection guidance	4	0.814664	0.0406425	ENSG00000082684, ENSG00000010319, ENSG00000145147, ENSG00000118257	411	36	19277	5.21141	0.568087
GO TERM: BP	GO:0048846~axon extension involved in axon guidance	GO:0048846	axon extension involved in axon guidance	4	0.814664	0.0406425	ENSG00000082684, ENSG00000010319, ENSG00000145147, ENSG00000118257	411	36	19277	5.21141	0.568087
GO TERM: BP	GO:0098801~regulation of renal system process	GO:0098801	regulation of renal system process	4	0.814664	0.0406425	ENSG00000181104, ENSG00000164251, ENSG00000100311, ENSG00000120937	411	36	19277	5.21141	0.568087
GO TERM: BP	GO:0060284~regulation of cell development	GO:0060284	regulation of cell development	31	6.31365	0.0409564	ENSG00000204099, ENSG00000115414, ENSG00000119782, ENSG00000074181, ENSG00000137642, ENSG00000166313, ENSG00000006210, ENSG00000128917, ENSG00000137261, ENSG00000162415, ENSG00000147852, ENSG00000158856, ENSG00000111249, ENSG00000130427, ENSG00000117228, ENSG00000132003, ENSG00000082684, ENSG00000170558, ENSG00000136040, ENSG00000166145, ENSG00000164683, ENSG00000166147, ENSG00000143869, ENSG0000…	411	1009	19277	1.44101	0.56852
GO TERM: MF	GO:0045296~cadherin binding	GO:0045296	cadherin binding	14	2.85132	0.0409821	ENSG00000173482, ENSG00000039068, ENSG00000104419, ENSG00000113100, ENSG00000074181, ENSG00000095383, ENSG00000170558, ENSG00000113361, ENSG00000118898, ENSG00000080031, ENSG00000079112, ENSG00000166341, ENSG00000127329, ENSG00000104881	381	333	16739	1.84709	0.541699
GO TERM: BP	GO:0001894~tissue homeostasis	GO:0001894	tissue homeostasis	11	2.24033	0.0410196	ENSG00000181104, ENSG00000160181, ENSG00000166340, ENSG00000153395, ENSG00000197375, ENSG00000089127, ENSG00000108187, ENSG00000077585, ENSG00000106031, ENSG00000173702, ENSG00000078804	411	249	19277	2.07201	0.56852
GO TERM: CC	GO:0044431~Golgi apparatus part	GO:0044431	Golgi apparatus part	33	6.72098	0.041214	ENSG00000105971, ENSG00000154265, ENSG00000174992, ENSG00000153395, ENSG00000039068, ENSG00000115257, ENSG00000156966, ENSG00000173702, ENSG00000074181, ENSG00000204592, ENSG00000137642, ENSG00000167080, ENSG00000167861, ENSG00000165861, ENSG00000008256, ENSG00000005243, ENSG00000183098, ENSG00000237172, ENSG00000145730, ENSG00000109610, ENSG00000128242, ENSG00000179399, ENSG00000115525, ENSG0000…	396	1015	17223	1.41404	0.394573
GO TERM: BP	GO:0033238~regulation of cellular amine metabolic process	GO:0033238	regulation of cellular amine metabolic process	6	1.222	0.0413016	ENSG00000166741, ENSG00000205220, ENSG00000058668, ENSG00000089163, ENSG00000170775, ENSG00000145335	411	89	19277	3.16198	0.56852
GO TERM: BP	GO:0002252~immune effector process	GO:0002252	immune effector process	41	8.35031	0.041509	ENSG00000244509, ENSG00000173083, ENSG00000153395, ENSG00000149131, ENSG00000148180, ENSG00000111331, ENSG00000204592, ENSG00000021852, ENSG00000006534, ENSG00000138496, ENSG00000140284, ENSG00000138772, ENSG00000123843, ENSG00000089127, ENSG00000164251, ENSG00000127329, ENSG00000124875, ENSG00000121361, ENSG00000179163, ENSG00000124253, ENSG00000160654, ENSG00000073008, ENSG00000132703, ENSG0000…	411	1417	19277	1.3571	0.56852
GO TERM: BP	GO:1903828~negative regulation of cellular protein localization	GO:1903828	negative regulation of cellular protein localization	8	1.62933	0.0415725	ENSG00000158856, ENSG00000135506, ENSG00000104537, ENSG00000108187, ENSG00000117228, ENSG00000150551, ENSG00000089163, ENSG00000078804	411	150	19277	2.50148	0.56852
GO TERM: BP	GO:0016101~diterpenoid metabolic process	GO:0016101	diterpenoid metabolic process	7	1.42566	0.0417847	ENSG00000118514, ENSG00000183098, ENSG00000179399, ENSG00000110244, ENSG00000196139, ENSG00000143320, ENSG00000138115	411	119	19277	2.75898	0.56852
GO TERM: BP	GO:0015749~monosaccharide transport	GO:0015749	monosaccharide transport	7	1.42566	0.0417847	ENSG00000173262, ENSG00000170482, ENSG00000198743, ENSG00000095637, ENSG00000127831, ENSG00000158865, ENSG00000059804	411	119	19277	2.75898	0.56852
GO TERM: BP	GO:1904375~regulation of protein localization to cell periphery	GO:1904375	regulation of protein localization to cell periphery	7	1.42566	0.0417847	ENSG00000179841, ENSG00000104537, ENSG00000095637, ENSG00000117228, ENSG00000058668, ENSG00000127831, ENSG00000150551	411	119	19277	2.75898	0.56852
GO TERM: BP	GO:0031347~regulation of defense response	GO:0031347	regulation of defense response	34	6.92464	0.0417901	ENSG00000137869, ENSG00000149131, ENSG00000135047, ENSG00000205220, ENSG00000173702, ENSG00000111331, ENSG00000204592, ENSG00000021852, ENSG00000138496, ENSG00000006210, ENSG00000123843, ENSG00000089127, ENSG00000205502, ENSG00000164251, ENSG00000124875, ENSG00000080293, ENSG00000160654, ENSG00000145335, ENSG00000124212, ENSG00000073008, ENSG00000173193, ENSG00000150593, ENSG00000132703, ENSG0000…	411	1133	19277	1.40749	0.56852
GO TERM: BP	GO:0009617~response to bacterium	GO:0009617	response to bacterium	26	5.29532	0.0418493	ENSG00000181104, ENSG00000174992, ENSG00000197375, ENSG00000111331, ENSG00000204592, ENSG00000138772, ENSG00000123843, ENSG00000157150, ENSG00000089127, ENSG00000164251, ENSG00000124875, ENSG00000121361, ENSG00000124253, ENSG00000145335, ENSG00000150593, ENSG00000130427, ENSG00000113140, ENSG00000158270, ENSG00000206503, ENSG00000161031, ENSG00000162645, ENSG00000164307, ENSG00000091986, ENSG0000…	411	814	19277	1.49812	0.56852
GO TERM: BP	GO:0070950~regulation of neutrophil mediated killing of bacterium	GO:0070950	regulation of neutrophil mediated killing of bacterium	2	0.407332	0.0420865	ENSG00000164251, ENSG00000124875	411	2	19277	46.9027	0.56852
GO TERM: BP	GO:0001519~peptide amidation	GO:0001519	peptide amidation	2	0.407332	0.0420865	ENSG00000161031, ENSG00000145730	411	2	19277	46.9027	0.56852
GO TERM: BP	GO:0070951~regulation of neutrophil mediated killing of gram-negative bacterium	GO:0070951	regulation of neutrophil mediated killing of gram-negative bacterium	2	0.407332	0.0420865	ENSG00000164251, ENSG00000124875	411	2	19277	46.9027	0.56852
GO TERM: BP	GO:0035543~positive regulation of SNARE complex assembly	GO:0035543	positive regulation of SNARE complex assembly	2	0.407332	0.0420865	ENSG00000147003, ENSG00000145335	411	2	19277	46.9027	0.56852
GO TERM: BP	GO:0009725~response to hormone	GO:0009725	response to hormone	30	6.10998	0.0423314	ENSG00000105971, ENSG00000135047, ENSG00000137642, ENSG00000142784, ENSG00000184481, ENSG00000012822, ENSG00000077092, ENSG00000137463, ENSG00000138772, ENSG00000157150, ENSG00000095637, ENSG00000145730, ENSG00000124253, ENSG00000102174, ENSG00000130427, ENSG00000105707, ENSG00000265972, ENSG00000196139, ENSG00000112293, ENSG00000113140, ENSG00000163131, ENSG00000164683, ENSG00000166147, ENSG0000…	411	972	19277	1.44761	0.569344
GO TERM: BP	GO:0048017~inositol lipid-mediated signaling	GO:0048017	inositol lipid-mediated signaling	9	1.83299	0.0423645	ENSG00000107731, ENSG00000181104, ENSG00000164251, ENSG00000130427, ENSG00000100311, ENSG00000115414, ENSG00000148180, ENSG00000046889, ENSG00000165953	411	183	19277	2.30669	0.569344
GO TERM: BP	GO:0042180~cellular ketone metabolic process	GO:0042180	cellular ketone metabolic process	12	2.44399	0.0424506	ENSG00000142784, ENSG00000118514, ENSG00000137869, ENSG00000110090, ENSG00000050165, ENSG00000110244, ENSG00000205220, ENSG00000058668, ENSG00000196139, ENSG00000089163, ENSG00000244474, ENSG00000145335	411	285	19277	1.97485	0.569344
GO TERM: BP	GO:0006027~glycosaminoglycan catabolic process	GO:0006027	glycosaminoglycan catabolic process	5	1.01833	0.0428593	ENSG00000173083, ENSG00000183098, ENSG00000161031, ENSG00000179399, ENSG00000179163	411	62	19277	3.78247	0.572419
GO TERM: BP	GO:0045936~negative regulation of phosphate metabolic process	GO:0045936	negative regulation of phosphate metabolic process	21	4.27699	0.0428831	ENSG00000179841, ENSG00000158856, ENSG00000173193, ENSG00000150593, ENSG00000105767, ENSG00000153395, ENSG00000155792, ENSG00000131370, ENSG00000119782, ENSG00000117228, ENSG00000137642, ENSG00000080031, ENSG00000165861, ENSG00000164251, ENSG00000123999, ENSG00000120129, ENSG00000108187, ENSG00000127329, ENSG00000100311, ENSG00000145147, ENSG00000145335	411	621	19277	1.58608	0.572419
GO TERM: BP	GO:0032940~secretion by cell	GO:0032940	secretion by cell	40	8.14664	0.0430697	ENSG00000181104, ENSG00000173083, ENSG00000153395, ENSG00000106327, ENSG00000149131, ENSG00000115414, ENSG00000119782, ENSG00000148180, ENSG00000135643, ENSG00000137642, ENSG00000006534, ENSG00000166313, ENSG00000140284, ENSG00000138772, ENSG00000164251, ENSG00000100665, ENSG00000127329, ENSG00000179163, ENSG00000145730, ENSG00000089163, ENSG00000145335, ENSG00000108679, ENSG00000158856, ENSG0000…	411	1382	19277	1.35753	0.573217
GO TERM: BP	GO:0008285~negative regulation of cell proliferation	GO:0008285	negative regulation of cell proliferation	26	5.29532	0.0431874	ENSG00000105971, ENSG00000181104, ENSG00000173482, ENSG00000107738, ENSG00000184481, ENSG00000077092, ENSG00000128917, ENSG00000266094, ENSG00000108187, ENSG00000150593, ENSG00000104419, ENSG00000105707, ENSG00000204580, ENSG00000147869, ENSG00000112293, ENSG00000113140, ENSG00000172638, ENSG00000166145, ENSG00000175707, ENSG00000120129, ENSG00000149269, ENSG00000119917, ENSG00000182156, ENSG0000…	411	815	19277	1.49628	0.573217
GO TERM: BP	GO:0045666~positive regulation of neuron differentiation	GO:0045666	positive regulation of neuron differentiation	15	3.05499	0.0433711	ENSG00000111249, ENSG00000130427, ENSG00000119782, ENSG00000115414, ENSG00000136040, ENSG00000166313, ENSG00000006210, ENSG00000143869, ENSG00000149269, ENSG00000187688, ENSG00000143320, ENSG00000145147, ENSG00000106078, ENSG00000185008, ENSG00000147852	411	394	19277	1.78563	0.573217
GO TERM: BP	GO:0003018~vascular process in circulatory system	GO:0003018	vascular process in circulatory system	9	1.83299	0.04352	ENSG00000181104, ENSG00000117298, ENSG00000164251, ENSG00000205502, ENSG00000120937, ENSG00000108576, ENSG00000145147, ENSG00000109610, ENSG00000135643	411	184	19277	2.29415	0.573217
GO TERM: BP	GO:0003176~aortic valve development	GO:0003176	aortic valve development	4	0.814664	0.0435535	ENSG00000164683, ENSG00000128917, ENSG00000145147, ENSG00000185008	411	37	19277	5.07056	0.573217
GO TERM: BP	GO:0090313~regulation of protein targeting to membrane	GO:0090313	regulation of protein targeting to membrane	4	0.814664	0.0435535	ENSG00000158856, ENSG00000174827, ENSG00000106688, ENSG00000149269	411	37	19277	5.07056	0.573217
GO TERM: BP	GO:0070555~response to interleukin-1	GO:0070555	response to interleukin-1	10	2.03666	0.043964	ENSG00000006210, ENSG00000130427, ENSG00000205220, ENSG00000162645, ENSG00000117228, ENSG00000124253, ENSG00000117226, ENSG00000156711, ENSG00000124212, ENSG00000145335	411	218	19277	2.1515	0.577271
GO TERM: CC	GO:0042383~sarcolemma	GO:0042383	sarcolemma	8	1.62933	0.044003	ENSG00000170558, ENSG00000105971, ENSG00000142156, ENSG00000128591, ENSG00000143153, ENSG00000075461, ENSG00000121361, ENSG00000058668	396	141	17223	2.46766	0.41448
GO TERM: MF	GO:0015020~glucuronosyltransferase activity	GO:0015020	glucuronosyltransferase activity	4	0.814664	0.0444784	ENSG00000156096, ENSG00000171234, ENSG00000135220, ENSG00000244474	381	35	16739	5.02107	0.580472
GO TERM: BP	GO:0001977~renal system process involved in regulation of blood volume	GO:0001977	renal system process involved in regulation of blood volume	3	0.610998	0.044486	ENSG00000181104, ENSG00000164251, ENSG00000100311	411	16	19277	8.79425	0.579932
GO TERM: BP	GO:1902285~semaphorin-plexin signaling pathway involved in neuron projection guidance	GO:1902285	semaphorin-plexin signaling pathway involved in neuron projection guidance	3	0.610998	0.044486	ENSG00000136040, ENSG00000117298, ENSG00000118257	411	16	19277	8.79425	0.579932
GO TERM: BP	GO:0051702~interaction with symbiont	GO:0051702	interaction with symbiont	7	1.42566	0.044709	ENSG00000105971, ENSG00000132109, ENSG00000132703, ENSG00000164251, ENSG00000124875, ENSG00000105707, ENSG00000115414	411	121	19277	2.71338	0.579932
GO TERM: BP	GO:1904062~regulation of cation transmembrane transport	GO:1904062	regulation of cation transmembrane transport	15	3.05499	0.0447848	ENSG00000181104, ENSG00000130427, ENSG00000075461, ENSG00000119782, ENSG00000114796, ENSG00000135643, ENSG00000163131, ENSG00000174827, ENSG00000006210, ENSG00000120049, ENSG00000118507, ENSG00000147003, ENSG00000143153, ENSG00000058668, ENSG00000145335	411	396	19277	1.77662	0.579932
GO TERM: BP	GO:0008104~protein localization	GO:0008104	protein localization	74	15.0713	0.0448105	ENSG00000214357, ENSG00000181104, ENSG00000173083, ENSG00000106688, ENSG00000175662, ENSG00000106327, ENSG00000198743, ENSG00000261582, ENSG00000095383, ENSG00000084731, ENSG00000166313, ENSG00000140284, ENSG00000137463, ENSG00000078081, ENSG00000183098, ENSG00000164251, ENSG00000137261, ENSG00000108187, ENSG00000143153, ENSG00000145730, ENSG00000160654, ENSG00000168778, ENSG00000179399, ENSG0000…	411	2833	19277	1.22513	0.579932
GO TERM: BP	GO:0010563~negative regulation of phosphorus metabolic process	GO:0010563	negative regulation of phosphorus metabolic process	21	4.27699	0.0448992	ENSG00000179841, ENSG00000158856, ENSG00000173193, ENSG00000150593, ENSG00000105767, ENSG00000153395, ENSG00000155792, ENSG00000131370, ENSG00000119782, ENSG00000117228, ENSG00000137642, ENSG00000080031, ENSG00000165861, ENSG00000164251, ENSG00000123999, ENSG00000120129, ENSG00000108187, ENSG00000127329, ENSG00000100311, ENSG00000145147, ENSG00000145335	411	622	19277	1.58353	0.579932
GO TERM: BP	GO:0044093~positive regulation of molecular function	GO:0044093	positive regulation of molecular function	50	10.1833	0.0449793	ENSG00000129521, ENSG00000181104, ENSG00000219607, ENSG00000106688, ENSG00000158806, ENSG00000107738, ENSG00000198743, ENSG00000095383, ENSG00000164251, ENSG00000143153, ENSG00000145335, ENSG00000132109, ENSG00000132669, ENSG00000137831, ENSG00000075461, ENSG00000204580, ENSG00000163131, ENSG00000168743, ENSG00000205517, ENSG00000138640, ENSG00000120049, ENSG00000121858, ENSG00000167779, ENSG0000…	411	1806	19277	1.29852	0.579932
GO TERM: BP	GO:0051707~response to other organism	GO:0051707	response to other organism	36	7.33198	0.0450791	ENSG00000181104, ENSG00000244509, ENSG00000174992, ENSG00000197375, ENSG00000111331, ENSG00000204592, ENSG00000138496, ENSG00000138772, ENSG00000123843, ENSG00000157150, ENSG00000089127, ENSG00000164251, ENSG00000124875, ENSG00000121361, ENSG00000124253, ENSG00000145335, ENSG00000150593, ENSG00000130427, ENSG00000179750, ENSG00000117228, ENSG00000120937, ENSG00000117226, ENSG00000113140, ENSG0000…	411	1222	19277	1.38175	0.579932
GO TERM: BP	GO:0009968~negative regulation of signal transduction	GO:0009968	negative regulation of signal transduction	41	8.35031	0.0450933	ENSG00000105971, ENSG00000107731, ENSG00000155792, ENSG00000205220, ENSG00000119782, ENSG00000111331, ENSG00000074181, ENSG00000137642, ENSG00000150938, ENSG00000006210, ENSG00000128917, ENSG00000089127, ENSG00000164251, ENSG00000108187, ENSG00000161642, ENSG00000050165, ENSG00000122870, ENSG00000058668, ENSG00000145335, ENSG00000173193, ENSG00000150593, ENSG00000106976, ENSG00000105767, ENSG0000…	411	1427	19277	1.34759	0.579932
GO TERM: BP	GO:0043207~response to external biotic stimulus	GO:0043207	response to external biotic stimulus	36	7.33198	0.046012	ENSG00000181104, ENSG00000244509, ENSG00000174992, ENSG00000197375, ENSG00000111331, ENSG00000204592, ENSG00000138496, ENSG00000138772, ENSG00000123843, ENSG00000157150, ENSG00000089127, ENSG00000164251, ENSG00000124875, ENSG00000121361, ENSG00000124253, ENSG00000145335, ENSG00000150593, ENSG00000130427, ENSG00000179750, ENSG00000117228, ENSG00000120937, ENSG00000117226, ENSG00000113140, ENSG0000…	411	1225	19277	1.37836	0.5904
GO TERM: BP	GO:0031099~regeneration	GO:0031099	regeneration	10	2.03666	0.0462772	ENSG00000138772, ENSG00000104324, ENSG00000166741, ENSG00000110090, ENSG00000137261, ENSG00000110244, ENSG00000119782, ENSG00000136881, ENSG00000148180, ENSG00000146678	411	220	19277	2.13194	0.592453
GO TERM: BP	GO:0006919~activation of cysteine-type endopeptidase activity involved in apoptotic process	GO:0006919	activation of cysteine-type endopeptidase activity involved in apoptotic process	6	1.222	0.0465236	ENSG00000181104, ENSG00000129521, ENSG00000106688, ENSG00000121858, ENSG00000145335, ENSG00000181634	411	92	19277	3.05887	0.594257
GO TERM: BP	GO:0072330~monocarboxylic acid biosynthetic process	GO:0072330	monocarboxylic acid biosynthetic process	11	2.24033	0.0469745	ENSG00000142784, ENSG00000140284, ENSG00000118514, ENSG00000163898, ENSG00000110244, ENSG00000138109, ENSG00000136881, ENSG00000196139, ENSG00000143320, ENSG00000138115, ENSG00000124212	411	255	19277	2.02325	0.598185
GO TERM: BP	GO:0031960~response to corticosteroid	GO:0031960	response to corticosteroid	9	1.83299	0.0470595	ENSG00000113140, ENSG00000164683, ENSG00000138772, ENSG00000120129, ENSG00000130427, ENSG00000124253, ENSG00000196139, ENSG00000145147, ENSG00000145730	411	187	19277	2.25735	0.598185
GO TERM: BP	GO:0031638~zymogen activation	GO:0031638	zymogen activation	5	1.01833	0.0472558	ENSG00000139178, ENSG00000055163, ENSG00000107738, ENSG00000135047, ENSG00000105707	411	64	19277	3.66427	0.598185
GO TERM: BP	GO:0010676~positive regulation of cellular carbohydrate metabolic process	GO:0010676	positive regulation of cellular carbohydrate metabolic process	5	1.01833	0.0472558	ENSG00000112293, ENSG00000166741, ENSG00000219607, ENSG00000095637, ENSG00000145335	411	64	19277	3.66427	0.598185
GO TERM: BP	GO:0034762~regulation of transmembrane transport	GO:0034762	regulation of transmembrane transport	19	3.86965	0.0474549	ENSG00000181104, ENSG00000197142, ENSG00000130427, ENSG00000075461, ENSG00000119782, ENSG00000114796, ENSG00000171227, ENSG00000135643, ENSG00000163131, ENSG00000174827, ENSG00000006210, ENSG00000120049, ENSG00000117262, ENSG00000118507, ENSG00000147003, ENSG00000143153, ENSG00000121361, ENSG00000058668, ENSG00000145335	411	550	19277	1.62027	0.599357
GO TERM: BP	GO:0006644~phospholipid metabolic process	GO:0006644	phospholipid metabolic process	17	3.46232	0.0478306	ENSG00000103066, ENSG00000102230, ENSG00000153395, ENSG00000130768, ENSG00000136960, ENSG00000110244, ENSG00000112293, ENSG00000084710, ENSG00000060642, ENSG00000169499, ENSG00000163898, ENSG00000163624, ENSG00000182156, ENSG00000100311, ENSG00000168528, ENSG00000143036, ENSG00000145335	411	475	19277	1.67862	0.601477
GO TERM: BP	GO:0071345~cellular response to cytokine stimulus	GO:0071345	cellular response to cytokine stimulus	35	7.12831	0.0478363	ENSG00000106688, ENSG00000150281, ENSG00000205220, ENSG00000008517, ENSG00000115414, ENSG00000117139, ENSG00000148180, ENSG00000111331, ENSG00000204592, ENSG00000118257, ENSG00000138496, ENSG00000006210, ENSG00000089127, ENSG00000164251, ENSG00000124875, ENSG00000124253, ENSG00000124212, ENSG00000181634, ENSG00000173193, ENSG00000150593, ENSG00000132109, ENSG00000130427, ENSG00000117228, ENSG0000…	411	1187	19277	1.38298	0.601477
GO TERM: BP	GO:0048469~cell maturation	GO:0048469	cell maturation	9	1.83299	0.0483152	ENSG00000006210, ENSG00000120049, ENSG00000131094, ENSG00000130427, ENSG00000153902, ENSG00000182134, ENSG00000115257, ENSG00000074527, ENSG00000174469	411	188	19277	2.24534	0.60309
GO TERM: BP	GO:0044802~single-organism membrane organization	GO:0044802	single-organism membrane organization	28	5.70265	0.0487327	ENSG00000179841, ENSG00000105971, ENSG00000039068, ENSG00000109738, ENSG00000181284, ENSG00000170175, ENSG00000084710, ENSG00000061656, ENSG00000174827, ENSG00000104081, ENSG00000143153, ENSG00000095637, ENSG00000058668, ENSG00000161249, ENSG00000145335, ENSG00000106976, ENSG00000104537, ENSG00000167371, ENSG00000104419, ENSG00000117228, ENSG00000150551, ENSG00000174469, ENSG00000170558, ENSG0000…	411	905	19277	1.45113	0.60309
GO TERM: BP	GO:0030855~epithelial cell differentiation	GO:0030855	epithelial cell differentiation	26	5.29532	0.0491398	ENSG00000173083, ENSG00000135047, ENSG00000117139, ENSG00000099284, ENSG00000118898, ENSG00000077092, ENSG00000164251, ENSG00000124253, ENSG00000265972, ENSG00000196139, ENSG00000196975, ENSG00000170558, ENSG00000186790, ENSG00000175707, ENSG00000164683, ENSG00000163430, ENSG00000166340, ENSG00000143869, ENSG00000110090, ENSG00000106031, ENSG00000100311, ENSG00000164488, ENSG00000165556, ENSG0000…	411	826	19277	1.47636	0.60309
GO TERM: BP	GO:1901701~cellular response to oxygen-containing compound	GO:1901701	cellular response to oxygen-containing compound	36	7.33198	0.049158	ENSG00000105971, ENSG00000106688, ENSG00000039068, ENSG00000110244, ENSG00000119782, ENSG00000137642, ENSG00000170775, ENSG00000142784, ENSG00000184481, ENSG00000137463, ENSG00000124875, ENSG00000095637, ENSG00000058668, ENSG00000124253, ENSG00000109610, ENSG00000145335, ENSG00000180720, ENSG00000158856, ENSG00000102174, ENSG00000150593, ENSG00000196139, ENSG00000150551, ENSG00000156711, ENSG0000…	411	1230	19277	1.37276	0.60309
GO TERM: BP	GO:0090100~positive regulation of transmembrane receptor protein serine/threonine kinase signaling pathway	GO:0090100	positive regulation of transmembrane receptor protein serine/threonine kinase signaling pathway	7	1.42566	0.0493296	ENSG00000168743, ENSG00000146197, ENSG00000123999, ENSG00000143869, ENSG00000137261, ENSG00000116985, ENSG00000139269	411	124	19277	2.64773	0.60309
GO TERM: BP	GO:1903729~regulation of plasma membrane organization	GO:1903729	regulation of plasma membrane organization	7	1.42566	0.0493296	ENSG00000179841, ENSG00000104537, ENSG00000095637, ENSG00000117228, ENSG00000058668, ENSG00000127831, ENSG00000150551	411	124	19277	2.64773	0.60309
GO TERM: BP	GO:0090280~positive regulation of calcium ion import	GO:0090280	positive regulation of calcium ion import	5	1.01833	0.0495445	ENSG00000181104, ENSG00000006210, ENSG00000187688, ENSG00000100311, ENSG00000145335	411	65	19277	3.6079	0.60309
GO TERM: BP	GO:0003170~heart valve development	GO:0003170	heart valve development	5	1.01833	0.0495445	ENSG00000164683, ENSG00000128917, ENSG00000166341, ENSG00000145147, ENSG00000185008	411	65	19277	3.6079	0.60309
GO TERM: BP	GO:1903078~positive regulation of protein localization to plasma membrane	GO:1903078	positive regulation of protein localization to plasma membrane	5	1.01833	0.0495445	ENSG00000179841, ENSG00000104537, ENSG00000095637, ENSG00000058668, ENSG00000127831	411	65	19277	3.6079	0.60309
GO TERM: BP	GO:0033619~membrane protein proteolysis	GO:0033619	membrane protein proteolysis	5	1.01833	0.0495445	ENSG00000112293, ENSG00000157150, ENSG00000187045, ENSG00000135074, ENSG00000164307	411	65	19277	3.6079	0.60309
GO TERM: BP	GO:0006656~phosphatidylcholine biosynthetic process	GO:0006656	phosphatidylcholine biosynthetic process	4	0.814664	0.049678	ENSG00000102230, ENSG00000153395, ENSG00000163624, ENSG00000143036	411	39	19277	4.81053	0.60309
GO TERM: BP	GO:0016114~terpenoid biosynthetic process	GO:0016114	terpenoid biosynthetic process	3	0.610998	0.0497237	ENSG00000118514, ENSG00000196139, ENSG00000143320	411	17	19277	8.27694	0.60309
GO TERM: BP	GO:0003184~pulmonary valve morphogenesis	GO:0003184	pulmonary valve morphogenesis	3	0.610998	0.0497237	ENSG00000164683, ENSG00000145147, ENSG00000185008	411	17	19277	8.27694	0.60309
GO TERM: BP	GO:0035493~SNARE complex assembly	GO:0035493	SNARE complex assembly	3	0.610998	0.0497237	ENSG00000147003, ENSG00000167371, ENSG00000145335	411	17	19277	8.27694	0.60309
GO TERM: BP	GO:1900116~extracellular negative regulation of signal transduction	GO:1900116	extracellular negative regulation of signal transduction	3	0.610998	0.0497237	ENSG00000147869, ENSG00000163430, ENSG00000166147	411	17	19277	8.27694	0.60309
GO TERM: BP	GO:1900115~extracellular regulation of signal transduction	GO:1900115	extracellular regulation of signal transduction	3	0.610998	0.0497237	ENSG00000147869, ENSG00000163430, ENSG00000166147	411	17	19277	8.27694	0.60309
GO TERM: BP	GO:0043687~post-translational protein modification	GO:0043687	post-translational protein modification	14	2.85132	0.0497846	ENSG00000127585, ENSG00000047457, ENSG00000205220, ENSG00000107829, ENSG00000115414, ENSG00000112293, ENSG00000170558, ENSG00000142784, ENSG00000086205, ENSG00000163430, ENSG00000166147, ENSG00000099937, ENSG00000175093, ENSG00000146678	411	365	19277	1.79901	0.60309
GO TERM: MF	GO:0008013~beta-catenin binding	GO:0008013	beta-catenin binding	6	1.222	0.0499103	ENSG00000099834, ENSG00000170558, ENSG00000012822, ENSG00000184481, ENSG00000039068, ENSG00000164488	381	88	16739	2.99553	0.636569
GO TERM: MF	GO:0050998~nitric-oxide synthase binding	GO:0050998	nitric-oxide synthase binding	3	0.610998	0.0500117	ENSG00000106976, ENSG00000058668, ENSG00000108576	381	16	16739	8.2377	0.636569

## Sheet: KEGG
Category	Term	ID	Pathway	Count	%	PValue	Genes	List Total	Pop Hits	Pop Total	Fold Enrichment	Benjamini
KEGG_PATHWAY	hsa00982:Drug metabolism - cytochrome P450	hsa00982	Drug metabolism - cytochrome P450	10	2.03666	6.00369e-05	ENSG00000076258, ENSG00000156096, ENSG00000171234, ENSG00000010932, ENSG00000135220, ENSG00000138109, ENSG00000131781, ENSG00000138115, ENSG00000244474, ENSG00000006534	200	72	8112	5.63333	0.0150692
KEGG_PATHWAY	hsa04974:Protein digestion and absorption	hsa04974	Protein digestion and absorption	10	2.03666	0.000920618	ENSG00000142156, ENSG00000158516, ENSG00000112394, ENSG00000188153, ENSG00000106688, ENSG00000111799, ENSG00000049089, ENSG00000143153, ENSG00000123643, ENSG00000187955	200	103	8112	3.93786	0.115538
KEGG_PATHWAY	hsa04512:ECM-receptor interaction	hsa04512	ECM-receptor interaction	8	1.62933	0.00570995	ENSG00000168743, ENSG00000142156, ENSG00000161638, ENSG00000188153, ENSG00000112769, ENSG00000169231, ENSG00000049089, ENSG00000115414	200	88	8112	3.68727	0.342749
KEGG_PATHWAY	hsa04976:Bile secretion	hsa04976	Bile secretion	8	1.62933	0.00607193	ENSG00000134538, ENSG00000156096, ENSG00000143153, ENSG00000171234, ENSG00000135220, ENSG00000136881, ENSG00000080293, ENSG00000244474	200	89	8112	3.64584	0.342749
KEGG_PATHWAY	hsa00040:Pentose and glucuronate interconversions	hsa00040	Pentose and glucuronate interconversions	5	1.01833	0.00916236	ENSG00000165475, ENSG00000156096, ENSG00000171234, ENSG00000135220, ENSG00000244474	200	34	8112	5.96471	0.342749
KEGG_PATHWAY	hsa03320:PPAR signaling pathway	hsa03320	PPAR signaling pathway	7	1.42566	0.0100021	ENSG00000140284, ENSG00000197142, ENSG00000167772, ENSG00000110090, ENSG00000147872, ENSG00000095637, ENSG00000124253	200	75	8112	3.7856	0.342749
KEGG_PATHWAY	hsa04510:Focal adhesion	hsa04510	Focal adhesion	12	2.44399	0.0104596	ENSG00000105971, ENSG00000142156, ENSG00000161638, ENSG00000188153, ENSG00000112769, ENSG00000128591, ENSG00000169231, ENSG00000049089, ENSG00000149269, ENSG00000065534, ENSG00000100311, ENSG00000115414	200	201	8112	2.42149	0.342749
KEGG_PATHWAY	hsa04514:Cell adhesion molecules	hsa04514	Cell adhesion molecules	10	2.03666	0.0109243	ENSG00000170558, ENSG00000073008, ENSG00000159261, ENSG00000206503, ENSG00000107738, ENSG00000173482, ENSG00000039068, ENSG00000165215, ENSG00000204592, ENSG00000174469	200	149	8112	2.72215	0.342749
KEGG_PATHWAY	hsa00140:Steroid hormone biosynthesis	hsa00140	Steroid hormone biosynthesis	6	1.222	0.0165537	ENSG00000137869, ENSG00000156096, ENSG00000171234, ENSG00000135220, ENSG00000196139, ENSG00000244474	200	61	8112	3.98951	0.461665
KEGG_PATHWAY	hsa04977:Vitamin digestion and absorption	hsa04977	Vitamin digestion and absorption	4	0.814664	0.0201415	ENSG00000086205, ENSG00000170482, ENSG00000110244, ENSG00000185339	200	24	8112	6.76	0.469292
KEGG_PATHWAY	hsa00860:Porphyrin metabolism	hsa00860	Porphyrin metabolism	5	1.01833	0.0205666	ENSG00000047457, ENSG00000156096, ENSG00000171234, ENSG00000135220, ENSG00000244474	200	43	8112	4.71628	0.469292
KEGG_PATHWAY	hsa00830:Retinol metabolism	hsa00830	Retinol metabolism	6	1.222	0.0253095	ENSG00000156096, ENSG00000171234, ENSG00000135220, ENSG00000138109, ENSG00000138115, ENSG00000244474	200	68	8112	3.57882	0.516712
KEGG_PATHWAY	hsa05204:Chemical carcinogenesis - DNA adducts	hsa05204	Chemical carcinogenesis - DNA adducts	6	1.222	0.026762	ENSG00000156096, ENSG00000171234, ENSG00000135220, ENSG00000138109, ENSG00000138115, ENSG00000244474	200	69	8112	3.52696	0.516712
KEGG_PATHWAY	hsa04145:Phagosome	hsa04145	Phagosome	9	1.83299	0.0332449	ENSG00000163131, ENSG00000161638, ENSG00000158270, ENSG00000206503, ENSG00000167552, ENSG00000169231, ENSG00000135047, ENSG00000116701, ENSG00000204592	200	152	8112	2.40158	0.596033
KEGG_PATHWAY	hsa00053:Ascorbate and aldarate metabolism	hsa00053	Ascorbate and aldarate metabolism	4	0.814664	0.0363152	ENSG00000156096, ENSG00000171234, ENSG00000135220, ENSG00000244474	200	30	8112	5.408	0.607674
KEGG_PATHWAY	hsa00980:Metabolism of xenobiotics by cytochrome P450	hsa00980	Metabolism of xenobiotics by cytochrome P450	6	1.222	0.0422361	ENSG00000156096, ENSG00000171234, ENSG00000135220, ENSG00000138109, ENSG00000244474, ENSG00000006534	200	78	8112	3.12	0.641385
KEGG_PATHWAY	hsa04142:Lysosome	hsa04142	Lysosome	8	1.62933	0.0434404	ENSG00000163131, ENSG00000103066, ENSG00000256043, ENSG00000166340, ENSG00000105612, ENSG00000078081, ENSG00000135047, ENSG00000179163	200	132	8112	2.45818	0.641385

## Sheet: Reactome
Category	Term	ID	Pathway	Count	%	PValue	Genes	List Total	Pop Hits	Pop Total	Fold Enrichment	Benjamini padj
REACTOME_PATHWAY	R-HSA-1474244~Extracellular matrix organization	R-HSA-1474244	Extracellular matrix organization	26	5.29532	2.78763e-07	ENSG00000161638, ENSG00000111799, ENSG00000072682, ENSG00000112769, ENSG00000039068, ENSG00000135047, ENSG00000134013, ENSG00000115414, ENSG00000145536, ENSG00000138131, ENSG00000049089, ENSG00000187955, ENSG00000146197, ENSG00000140092, ENSG00000152952, ENSG00000204580, ENSG00000113140, ENSG00000163131, ENSG00000172638, ENSG00000142156, ENSG00000188153, ENSG00000166147, ENSG00000135074, ENSG0000…	275	301	10538	3.31003	0.000241688
REACTOME_PATHWAY	R-HSA-1474290~Collagen formation	R-HSA-1474290	Collagen formation	11	2.24033	0.000109634	ENSG00000163131, ENSG00000138131, ENSG00000142156, ENSG00000188153, ENSG00000111799, ENSG00000072682, ENSG00000135047, ENSG00000134013, ENSG00000049089, ENSG00000152952, ENSG00000187955	275	90	10538	4.68356	0.0475265
REACTOME_PATHWAY	R-HSA-2022090~Assembly of collagen fibrils and other multimeric structures	R-HSA-2022090	Assembly of collagen fibrils and other multimeric structures	9	1.83299	0.000168147	ENSG00000163131, ENSG00000138131, ENSG00000142156, ENSG00000188153, ENSG00000111799, ENSG00000135047, ENSG00000134013, ENSG00000049089, ENSG00000187955	275	61	10538	5.65377	0.0485944
REACTOME_PATHWAY	R-HSA-1474228~Degradation of the extracellular matrix	R-HSA-1474228	Degradation of the extracellular matrix	13	2.64766	0.000283874	ENSG00000111799, ENSG00000146197, ENSG00000039068, ENSG00000135047, ENSG00000115414, ENSG00000145536, ENSG00000163131, ENSG00000142156, ENSG00000188153, ENSG00000166147, ENSG00000187045, ENSG00000049089, ENSG00000187955	275	140	10538	3.55829	0.0615297
REACTOME_PATHWAY	R-HSA-425407~SLC-mediated transmembrane transport	R-HSA-425407	SLC-mediated transmembrane transport	17	3.46232	0.000824024	ENSG00000134538, ENSG00000155850, ENSG00000106688, ENSG00000047457, ENSG00000177984, ENSG00000156222, ENSG00000174640, ENSG00000197375, ENSG00000173262, ENSG00000139209, ENSG00000158865, ENSG00000112394, ENSG00000136052, ENSG00000123643, ENSG00000143036, ENSG00000059804, ENSG00000148942	275	250	10538	2.60576	0.142886
REACTOME_PATHWAY	R-HSA-1566948~Elastic fibre formation	R-HSA-1566948	Elastic fibre formation	7	1.42566	0.00101613	ENSG00000172638, ENSG00000138131, ENSG00000161638, ENSG00000166147, ENSG00000134013, ENSG00000140092, ENSG00000115414	275	45	10538	5.96089	0.146831
REACTOME_PATHWAY	R-HSA-421270~Cell-cell junction organization	R-HSA-421270	Cell-cell junction organization	8	1.62933	0.00130305	ENSG00000170558, ENSG00000113361, ENSG00000073008, ENSG00000159261, ENSG00000079112, ENSG00000039068, ENSG00000165215, ENSG00000113100	275	64	10538	4.79	0.161392
REACTOME_PATHWAY	R-HSA-418990~Adherens junctions interactions	R-HSA-418990	Adherens junctions interactions	6	1.222	0.00149703	ENSG00000170558, ENSG00000113361, ENSG00000073008, ENSG00000079112, ENSG00000039068, ENSG00000113100	275	33	10538	6.96727	0.16224
REACTOME_PATHWAY	R-HSA-382551~Transport of small molecules	R-HSA-382551	Transport of small molecules	33	6.72098	0.00243587	ENSG00000135506, ENSG00000134538, ENSG00000154265, ENSG00000155850, ENSG00000106688, ENSG00000177984, ENSG00000156222, ENSG00000197375, ENSG00000106327, ENSG00000173262, ENSG00000205220, ENSG00000110244, ENSG00000176533, ENSG00000119782, ENSG00000139209, ENSG00000158865, ENSG00000136052, ENSG00000123643, ENSG00000143153, ENSG00000058668, ENSG00000143595, ENSG00000147852, ENSG00000143036, ENSG0000…	275	729	10538	1.73465	0.195739
REACTOME_PATHWAY	R-HSA-1236977~Endosomal/Vacuolar pathway	R-HSA-1236977	Endosomal/Vacuolar pathway	4	0.814664	0.00245713	ENSG00000163131, ENSG00000206503, ENSG00000135047, ENSG00000204592	275	11	10538	13.9345	0.195739
REACTOME_PATHWAY	R-HSA-446728~Cell junction organization	R-HSA-446728	Cell junction organization	9	1.83299	0.00248343	ENSG00000170558, ENSG00000113361, ENSG00000073008, ENSG00000159261, ENSG00000079112, ENSG00000039068, ENSG00000128591, ENSG00000165215, ENSG00000113100	275	91	10538	3.78989	0.195739
REACTOME_PATHWAY	R-HSA-1442490~Collagen degradation	R-HSA-1442490	Collagen degradation	7	1.42566	0.00620647	ENSG00000142156, ENSG00000188153, ENSG00000111799, ENSG00000187045, ENSG00000135047, ENSG00000049089, ENSG00000187955	275	64	10538	4.19125	0.448417
REACTOME_PATHWAY	R-HSA-1650814~Collagen biosynthesis and modifying enzymes	R-HSA-1650814	Collagen biosynthesis and modifying enzymes	7	1.42566	0.00774603	ENSG00000142156, ENSG00000188153, ENSG00000111799, ENSG00000072682, ENSG00000049089, ENSG00000152952, ENSG00000187955	275	67	10538	4.00358	0.516601
REACTOME_PATHWAY	R-HSA-877300~Interferon gamma signaling	R-HSA-877300	Interferon gamma signaling	8	1.62933	0.00939877	ENSG00000132109, ENSG00000206503, ENSG00000089127, ENSG00000162645, ENSG00000117228, ENSG00000117226, ENSG00000111331, ENSG00000204592	275	91	10538	3.36879	0.55161
REACTOME_PATHWAY	R-HSA-909733~Interferon alpha/beta signaling	R-HSA-909733	Interferon alpha/beta signaling	7	1.42566	0.00954343	ENSG00000206503, ENSG00000089127, ENSG00000185201, ENSG00000162645, ENSG00000119917, ENSG00000111331, ENSG00000204592	275	70	10538	3.832	0.55161
REACTOME_PATHWAY	R-HSA-196854~Metabolism of vitamins and cofactors	R-HSA-196854	Metabolism of vitamins and cofactors	12	2.44399	0.0108056	ENSG00000138496, ENSG00000173193, ENSG00000166741, ENSG00000183098, ENSG00000179399, ENSG00000170482, ENSG00000136960, ENSG00000110244, ENSG00000196139, ENSG00000059804, ENSG00000185339, ENSG00000124212	275	190	10538	2.42021	0.585531
REACTOME_PATHWAY	R-HSA-197264~Nicotinamide salvaging	R-HSA-197264	Nicotinamide salvaging	4	0.814664	0.012376	ENSG00000138496, ENSG00000173193, ENSG00000166741, ENSG00000124212	275	19	10538	8.06737	0.631177
REACTOME_PATHWAY	R-HSA-211859~Biological oxidations	R-HSA-211859	Biological oxidations	13	2.64766	0.0132602	ENSG00000155850, ENSG00000132744, ENSG00000137869, ENSG00000171234, ENSG00000135220, ENSG00000138109, ENSG00000138115, ENSG00000244474, ENSG00000166741, ENSG00000156096, ENSG00000128965, ENSG00000010932, ENSG00000124212	275	222	10538	2.24396	0.638699
REACTOME_PATHWAY	R-HSA-913531~Interferon Signaling	R-HSA-913531	Interferon Signaling	12	2.44399	0.0148724	ENSG00000156587, ENSG00000132109, ENSG00000206503, ENSG00000089127, ENSG00000185201, ENSG00000162645, ENSG00000119917, ENSG00000117228, ENSG00000117226, ENSG00000111331, ENSG00000204592, ENSG00000107201	275	199	10538	2.31075	0.67865
REACTOME_PATHWAY	R-HSA-3000171~Non-integrin membrane-ECM interactions	R-HSA-3000171	Non-integrin membrane-ECM interactions	6	1.222	0.0183014	ENSG00000188153, ENSG00000112769, ENSG00000100311, ENSG00000115414, ENSG00000074527, ENSG00000204580	275	59	10538	3.89695	0.793367
REACTOME_PATHWAY	R-HSA-1500931~Cell-Cell communication	R-HSA-1500931	Cell-Cell communication	9	1.83299	0.0192478	ENSG00000170558, ENSG00000113361, ENSG00000073008, ENSG00000159261, ENSG00000079112, ENSG00000039068, ENSG00000128591, ENSG00000165215, ENSG00000113100	275	129	10538	2.67349	0.794659
REACTOME_PATHWAY	R-HSA-8983711~OAS antiviral response	R-HSA-8983711	OAS antiviral response	3	0.610998	0.0214933	ENSG00000089127, ENSG00000111331, ENSG00000107201	275	9	10538	12.7733	0.832481
REACTOME_PATHWAY	R-HSA-216083~Integrin cell surface interactions	R-HSA-216083	Integrin cell surface interactions	7	1.42566	0.0231206	ENSG00000142156, ENSG00000161638, ENSG00000188153, ENSG00000166147, ENSG00000039068, ENSG00000049089, ENSG00000115414	275	85	10538	3.15576	0.832481
REACTOME_PATHWAY	R-HSA-193368~Synthesis of bile acids and bile salts via 7alpha-hydroxycholesterol	R-HSA-193368	Synthesis of bile acids and bile salts via 7alpha-hydroxycholesterol	4	0.814664	0.0235047	ENSG00000140284, ENSG00000136881, ENSG00000196139, ENSG00000124212	275	24	10538	6.38667	0.832481
REACTOME_PATHWAY	R-HSA-5362517~Signaling by Retinoic Acid	R-HSA-5362517	Signaling by Retinoic Acid	5	1.01833	0.0249349	ENSG00000118514, ENSG00000077092, ENSG00000110090, ENSG00000196139, ENSG00000143320	275	43	10538	4.45581	0.832481
REACTOME_PATHWAY	R-HSA-156588~Glucuronidation	R-HSA-156588	Glucuronidation	4	0.814664	0.0262087	ENSG00000156096, ENSG00000171234, ENSG00000135220, ENSG00000244474	275	25	10538	6.1312	0.832481
REACTOME_PATHWAY	R-HSA-983170~Antigen Presentation: Folding, assembly and peptide loading of class I MHC	R-HSA-983170	Antigen Presentation: Folding, assembly and peptide loading of class I MHC	4	0.814664	0.0262087	ENSG00000231925, ENSG00000206503, ENSG00000164307, ENSG00000204592	275	25	10538	6.1312	0.832481
REACTOME_PATHWAY	R-HSA-8948216~Collagen chain trimerization	R-HSA-8948216	Collagen chain trimerization	5	1.01833	0.0268852	ENSG00000142156, ENSG00000188153, ENSG00000111799, ENSG00000049089, ENSG00000187955	275	44	10538	4.35455	0.832481
REACTOME_PATHWAY	R-HSA-194068~Bile acid and bile salt metabolism	R-HSA-194068	Bile acid and bile salt metabolism	5	1.01833	0.0289244	ENSG00000134538, ENSG00000140284, ENSG00000136881, ENSG00000196139, ENSG00000124212	275	45	10538	4.25778	0.864739
REACTOME_PATHWAY	R-HSA-2980736~Peptide hormone metabolism	R-HSA-2980736	Peptide hormone metabolism	7	1.42566	0.0310312	ENSG00000123999, ENSG00000147003, ENSG00000166825, ENSG00000165556, ENSG00000139269, ENSG00000086619, ENSG00000177669	275	91	10538	2.94769	0.896803
REACTOME_PATHWAY	R-HSA-373752~Netrin-1 signaling	R-HSA-373752	Netrin-1 signaling	5	1.01833	0.0404695	ENSG00000107731, ENSG00000149269, ENSG00000145147, ENSG00000074527, ENSG00000156711	275	50	10538	3.832	1
REACTOME_PATHWAY	R-HSA-196849~Metabolism of water-soluble vitamins and cofactors	R-HSA-196849	Metabolism of water-soluble vitamins and cofactors	8	1.62933	0.0413037	ENSG00000138496, ENSG00000173193, ENSG00000166741, ENSG00000170482, ENSG00000136960, ENSG00000059804, ENSG00000185339, ENSG00000124212	275	123	10538	2.49236	1
REACTOME_PATHWAY	R-HSA-381426~Regulation of Insulin-like Growth Factor (IGF) transport and uptake by Insulin-like Growth Factor Binding Proteins (IGFBPs)	R-HSA-381426	Regulation of Insulin-like Growth Factor (IGF) transport and uptake by Insulin-like Growth Factor Binding Proteins (IGFBPs)	8	1.62933	0.0444265	ENSG00000170558, ENSG00000163430, ENSG00000166147, ENSG00000047457, ENSG00000115414, ENSG00000167779, ENSG00000099937, ENSG00000146678	275	125	10538	2.45248	1
REACTOME_PATHWAY	R-HSA-196807~Nicotinate metabolism	R-HSA-196807	Nicotinate metabolism	4	0.814664	0.0457432	ENSG00000138496, ENSG00000173193, ENSG00000166741, ENSG00000124212	275	31	10538	4.94452	1
REACTOME_PATHWAY	R-HSA-3000178~ECM proteoglycans	R-HSA-3000178	ECM proteoglycans	6	1.222	0.0475402	ENSG00000113140, ENSG00000142156, ENSG00000188153, ENSG00000112769, ENSG00000049089, ENSG00000115414	275	76	10538	3.02526	1
REACTOME_PATHWAY	R-HSA-193775~Synthesis of bile acids and bile salts via 24-hydroxycholesterol	R-HSA-193775	Synthesis of bile acids and bile salts via 24-hydroxycholesterol	3	0.610998	0.0498977	ENSG00000140284, ENSG00000196139, ENSG00000124212	275	14	10538	8.21143	1
