# Supplementary material for: Culture of Cancer Cells at Physiological Oxygen Levels Affects Gene Expression in a Cell-Type Specific Manner
Source: Preprints.org preprint supplement (doi:10.20944/preprints202208.0497.v1), 2022-08-29
Supplement: Supplementary file 12 [file Table S8 Functional Enrichent Huh-7 18% O2.xlsx]

## Sheet: GO
Category	Term	ID	Name	Count	%	PValue	Genes	List Total	Pop Hits	Pop Total	Fold Enrichment	Benjamini padj
GO TERM: CC	GO:0022626~cytosolic ribosome	GO:0022626	cytosolic ribosome	31	7.80856	6.1533e-30	ENSG00000213741, ENSG00000131469, ENSG00000110700, ENSG00000134419, ENSG00000112306, ENSG00000265681, ENSG00000197756, ENSG00000171863, ENSG00000163682, ENSG00000171858, ENSG00000198918, ENSG00000156482, ENSG00000109475, ENSG00000137818, ENSG00000118181, ENSG00000008988, ENSG00000137876, ENSG00000241343, ENSG00000233927, ENSG00000197958, ENSG00000145425, ENSG00000114391, ENSG00000185088, ENSG0000…	266	106	17223	18.9358	3.02742e-27
GO TERM: MF	GO:0003735~structural constituent of ribosome	GO:0003735	structural constituent of ribosome	37	9.3199	4.6123e-30	ENSG00000213741, ENSG00000131469, ENSG00000163319, ENSG00000110700, ENSG00000134419, ENSG00000112306, ENSG00000171421, ENSG00000265681, ENSG00000197756, ENSG00000171863, ENSG00000163682, ENSG00000171858, ENSG00000163584, ENSG00000198918, ENSG00000156482, ENSG00000109475, ENSG00000137818, ENSG00000118181, ENSG00000198015, ENSG00000008988, ENSG00000137876, ENSG00000241343, ENSG00000136522, ENSG0000…	234	197	16739	13.4354	3.25629e-27
GO TERM: CC	GO:0044391~ribosomal subunit	GO:0044391	ribosomal subunit	37	9.3199	2.73826e-29	ENSG00000213741, ENSG00000131469, ENSG00000163319, ENSG00000110700, ENSG00000134419, ENSG00000112306, ENSG00000171421, ENSG00000265681, ENSG00000197756, ENSG00000171863, ENSG00000204316, ENSG00000163682, ENSG00000171858, ENSG00000198918, ENSG00000156482, ENSG00000109475, ENSG00000137818, ENSG00000118181, ENSG00000198015, ENSG00000008988, ENSG00000137876, ENSG00000241343, ENSG00000136522, ENSG0000…	266	187	17223	12.8111	6.73613e-27
GO TERM: BP	GO:0002181~cytoplasmic translation	GO:0002181	cytoplasmic translation	33	8.31234	5.27637e-28	ENSG00000213741, ENSG00000131469, ENSG00000110700, ENSG00000134419, ENSG00000112306, ENSG00000104408, ENSG00000265681, ENSG00000197756, ENSG00000171863, ENSG00000163682, ENSG00000171858, ENSG00000163584, ENSG00000198918, ENSG00000156482, ENSG00000109475, ENSG00000161960, ENSG00000137818, ENSG00000118181, ENSG00000008988, ENSG00000241343, ENSG00000233927, ENSG00000197958, ENSG00000060138, ENSG0000…	276	156	19277	14.7747	1.2033e-24
GO TERM: BP	GO:0006614~SRP-dependent cotranslational protein targeting to membrane	GO:0006614	SRP-dependent cotranslational protein targeting to membrane	29	7.30479	6.21701e-28	ENSG00000213741, ENSG00000131469, ENSG00000110700, ENSG00000134419, ENSG00000112306, ENSG00000265681, ENSG00000197756, ENSG00000171863, ENSG00000163682, ENSG00000171858, ENSG00000198918, ENSG00000156482, ENSG00000109475, ENSG00000137818, ENSG00000118181, ENSG00000008988, ENSG00000241343, ENSG00000233927, ENSG00000197958, ENSG00000145425, ENSG00000114391, ENSG00000166441, ENSG00000231500, ENSG0000…	276	106	19277	19.1083	1.2033e-24
GO TERM: BP	GO:0006613~cotranslational protein targeting to membrane	GO:0006613	cotranslational protein targeting to membrane	29	7.30479	3.38517e-27	ENSG00000213741, ENSG00000131469, ENSG00000110700, ENSG00000134419, ENSG00000112306, ENSG00000265681, ENSG00000197756, ENSG00000171863, ENSG00000163682, ENSG00000171858, ENSG00000198918, ENSG00000156482, ENSG00000109475, ENSG00000137818, ENSG00000118181, ENSG00000008988, ENSG00000241343, ENSG00000233927, ENSG00000197958, ENSG00000145425, ENSG00000114391, ENSG00000166441, ENSG00000231500, ENSG0000…	276	112	19277	18.0847	4.368e-24
GO TERM: BP	GO:0000184~nuclear-transcribed mRNA catabolic process, nonsense-mediated decay	GO:0000184	nuclear-transcribed mRNA catabolic process, nonsense-mediated decay	30	7.55668	5.26423e-27	ENSG00000213741, ENSG00000131469, ENSG00000110700, ENSG00000134419, ENSG00000112306, ENSG00000104408, ENSG00000265681, ENSG00000197756, ENSG00000171863, ENSG00000163682, ENSG00000171858, ENSG00000198918, ENSG00000156482, ENSG00000109475, ENSG00000137818, ENSG00000118181, ENSG00000008988, ENSG00000241343, ENSG00000233927, ENSG00000197958, ENSG00000145425, ENSG00000114391, ENSG00000166441, ENSG0000…	276	126	19277	16.6296	5.09446e-24
GO TERM: CC	GO:0005840~ribosome	GO:0005840	ribosome	39	9.82368	5.65971e-26	ENSG00000213741, ENSG00000131469, ENSG00000163319, ENSG00000110700, ENSG00000134419, ENSG00000112306, ENSG00000171421, ENSG00000265681, ENSG00000197756, ENSG00000171863, ENSG00000204316, ENSG00000163682, ENSG00000171858, ENSG00000163584, ENSG00000198918, ENSG00000156482, ENSG00000109475, ENSG00000137818, ENSG00000118181, ENSG00000198015, ENSG00000008988, ENSG00000137876, ENSG00000241343, ENSG0000…	266	265	17223	9.52897	9.28192e-24
GO TERM: BP	GO:0045047~protein targeting to ER	GO:0045047	protein targeting to ER	29	7.30479	9.39463e-26	ENSG00000213741, ENSG00000131469, ENSG00000110700, ENSG00000134419, ENSG00000112306, ENSG00000265681, ENSG00000197756, ENSG00000171863, ENSG00000163682, ENSG00000171858, ENSG00000198918, ENSG00000156482, ENSG00000109475, ENSG00000137818, ENSG00000118181, ENSG00000008988, ENSG00000241343, ENSG00000233927, ENSG00000197958, ENSG00000145425, ENSG00000114391, ENSG00000166441, ENSG00000231500, ENSG0000…	276	125	19277	16.2039	7.27332e-23
GO TERM: BP	GO:0072599~establishment of protein localization to endoplasmic reticulum	GO:0072599	establishment of protein localization to endoplasmic reticulum	29	7.30479	2.40502e-25	ENSG00000213741, ENSG00000131469, ENSG00000110700, ENSG00000134419, ENSG00000112306, ENSG00000265681, ENSG00000197756, ENSG00000171863, ENSG00000163682, ENSG00000171858, ENSG00000198918, ENSG00000156482, ENSG00000109475, ENSG00000137818, ENSG00000118181, ENSG00000008988, ENSG00000241343, ENSG00000233927, ENSG00000197958, ENSG00000145425, ENSG00000114391, ENSG00000166441, ENSG00000231500, ENSG0000…	276	129	19277	15.7014	1.55164e-22
GO TERM: BP	GO:0006413~translational initiation	GO:0006413	translational initiation	32	8.06045	1.07146e-23	ENSG00000213741, ENSG00000131469, ENSG00000110700, ENSG00000134419, ENSG00000112306, ENSG00000104408, ENSG00000265681, ENSG00000197756, ENSG00000171863, ENSG00000163682, ENSG00000171858, ENSG00000198918, ENSG00000005100, ENSG00000156482, ENSG00000109475, ENSG00000161960, ENSG00000137818, ENSG00000118181, ENSG00000008988, ENSG00000241343, ENSG00000233927, ENSG00000197958, ENSG00000145425, ENSG0000…	276	194	19277	11.5207	5.92519e-21
GO TERM: BP	GO:0070972~protein localization to endoplasmic reticulum	GO:0070972	protein localization to endoplasmic reticulum	29	7.30479	1.07344e-22	ENSG00000213741, ENSG00000131469, ENSG00000110700, ENSG00000134419, ENSG00000112306, ENSG00000265681, ENSG00000197756, ENSG00000171863, ENSG00000163682, ENSG00000171858, ENSG00000198918, ENSG00000156482, ENSG00000109475, ENSG00000137818, ENSG00000118181, ENSG00000008988, ENSG00000241343, ENSG00000233927, ENSG00000197958, ENSG00000145425, ENSG00000114391, ENSG00000166441, ENSG00000231500, ENSG0000…	276	159	19277	12.7389	5.19411e-20
GO TERM: BP	GO:0042254~ribosome biogenesis	GO:0042254	ribosome biogenesis	38	9.57179	7.55591e-22	ENSG00000131469, ENSG00000130810, ENSG00000171421, ENSG00000265681, ENSG00000176731, ENSG00000197756, ENSG00000171863, ENSG00000135521, ENSG00000135763, ENSG00000163682, ENSG00000171858, ENSG00000198918, ENSG00000108561, ENSG00000156482, ENSG00000179041, ENSG00000109475, ENSG00000182841, ENSG00000162851, ENSG00000101361, ENSG00000137818, ENSG00000261236, ENSG00000077348, ENSG00000118181, ENSG0000…	276	346	19277	7.67075	3.24988e-19
GO TERM: BP	GO:0019083~viral transcription	GO:0019083	viral transcription	29	7.30479	4.90042e-21	ENSG00000213741, ENSG00000131469, ENSG00000110700, ENSG00000134419, ENSG00000112306, ENSG00000265681, ENSG00000197756, ENSG00000171863, ENSG00000163682, ENSG00000171858, ENSG00000198918, ENSG00000156482, ENSG00000109475, ENSG00000137818, ENSG00000118181, ENSG00000008988, ENSG00000241343, ENSG00000233927, ENSG00000197958, ENSG00000145425, ENSG00000114391, ENSG00000166441, ENSG00000231500, ENSG0000…	276	182	19277	11.129	1.89695e-18
GO TERM: BP	GO:0000956~nuclear-transcribed mRNA catabolic process	GO:0000956	nuclear-transcribed mRNA catabolic process	31	7.80856	9.65396e-21	ENSG00000213741, ENSG00000131469, ENSG00000110700, ENSG00000134419, ENSG00000112306, ENSG00000104408, ENSG00000265681, ENSG00000197756, ENSG00000171863, ENSG00000163682, ENSG00000171858, ENSG00000198918, ENSG00000156482, ENSG00000109475, ENSG00000137818, ENSG00000077348, ENSG00000118181, ENSG00000008988, ENSG00000241343, ENSG00000233927, ENSG00000197958, ENSG00000145425, ENSG00000114391, ENSG0000…	276	223	19277	9.70928	3.39731e-18
GO TERM: CC	GO:0044445~cytosolic part	GO:0044445	cytosolic part	33	8.31234	4.31003e-20	ENSG00000213741, ENSG00000131469, ENSG00000110700, ENSG00000134419, ENSG00000112306, ENSG00000265681, ENSG00000197756, ENSG00000171863, ENSG00000163682, ENSG00000171858, ENSG00000198918, ENSG00000005100, ENSG00000156482, ENSG00000109475, ENSG00000169627, ENSG00000137818, ENSG00000118181, ENSG00000008988, ENSG00000137876, ENSG00000241343, ENSG00000233927, ENSG00000197958, ENSG00000145425, ENSG0000…	266	257	17223	8.31396	5.30133e-18
GO TERM: CC	GO:0030529~intracellular ribonucleoprotein complex	GO:0030529	intracellular ribonucleoprotein complex	58	14.6096	1.20879e-19	ENSG00000213741, ENSG00000163319, ENSG00000110700, ENSG00000171421, ENSG00000171863, ENSG00000135521, ENSG00000221493, ENSG00000204316, ENSG00000163682, ENSG00000171858, ENSG00000100902, ENSG00000124279, ENSG00000109475, ENSG00000182004, ENSG00000182841, ENSG00000198015, ENSG00000137876, ENSG00000241343, ENSG00000233927, ENSG00000197958, ENSG00000166441, ENSG00000231500, ENSG00000143947, ENSG0000…	266	935	17223	4.01646	1.18945e-17
GO TERM: CC	GO:1990904~ribonucleoprotein complex	GO:1990904	ribonucleoprotein complex	59	14.8615	9.99253e-19	ENSG00000213741, ENSG00000163319, ENSG00000110700, ENSG00000171421, ENSG00000171863, ENSG00000135521, ENSG00000221493, ENSG00000204316, ENSG00000163682, ENSG00000171858, ENSG00000100902, ENSG00000124279, ENSG00000109475, ENSG00000182004, ENSG00000182841, ENSG00000198015, ENSG00000137876, ENSG00000241343, ENSG00000233927, ENSG00000197958, ENSG00000166441, ENSG00000231500, ENSG00000143947, ENSG0000…	266	1012	17223	3.77484	8.19387e-17
GO TERM: BP	GO:0006402~mRNA catabolic process	GO:0006402	mRNA catabolic process	31	7.80856	2.96129e-19	ENSG00000213741, ENSG00000131469, ENSG00000110700, ENSG00000134419, ENSG00000112306, ENSG00000104408, ENSG00000265681, ENSG00000197756, ENSG00000171863, ENSG00000163682, ENSG00000171858, ENSG00000198918, ENSG00000156482, ENSG00000109475, ENSG00000137818, ENSG00000077348, ENSG00000118181, ENSG00000008988, ENSG00000241343, ENSG00000233927, ENSG00000197958, ENSG00000145425, ENSG00000114391, ENSG0000…	276	251	19277	8.62618	9.55262e-17
GO TERM: BP	GO:0006612~protein targeting to membrane	GO:0006612	protein targeting to membrane	30	7.55668	4.38896e-19	ENSG00000213741, ENSG00000131469, ENSG00000110700, ENSG00000134419, ENSG00000112306, ENSG00000265681, ENSG00000197756, ENSG00000171863, ENSG00000163682, ENSG00000171858, ENSG00000198918, ENSG00000156482, ENSG00000109475, ENSG00000137818, ENSG00000118181, ENSG00000008988, ENSG00000241343, ENSG00000233927, ENSG00000197958, ENSG00000145425, ENSG00000114391, ENSG00000186198, ENSG00000166441, ENSG0000…	276	234	19277	8.95438	1.3069e-16
GO TERM: BP	GO:0022613~ribonucleoprotein complex biogenesis	GO:0022613	ribonucleoprotein complex biogenesis	43	10.8312	7.06947e-19	ENSG00000131469, ENSG00000130810, ENSG00000171421, ENSG00000104408, ENSG00000265681, ENSG00000176731, ENSG00000197756, ENSG00000171863, ENSG00000135521, ENSG00000135763, ENSG00000163682, ENSG00000171858, ENSG00000198918, ENSG00000143977, ENSG00000108561, ENSG00000156482, ENSG00000179041, ENSG00000109475, ENSG00000182004, ENSG00000182841, ENSG00000162851, ENSG00000101361, ENSG00000172062, ENSG0000…	276	559	19277	5.37263	1.95471e-16
GO TERM: BP	GO:0006401~RNA catabolic process	GO:0006401	RNA catabolic process	32	8.06045	1.73464e-18	ENSG00000213741, ENSG00000131469, ENSG00000110700, ENSG00000134419, ENSG00000112306, ENSG00000104408, ENSG00000265681, ENSG00000197756, ENSG00000171863, ENSG00000163682, ENSG00000171858, ENSG00000198918, ENSG00000119705, ENSG00000156482, ENSG00000109475, ENSG00000137818, ENSG00000077348, ENSG00000118181, ENSG00000008988, ENSG00000241343, ENSG00000233927, ENSG00000197958, ENSG00000145425, ENSG0000…	276	289	19277	7.73361	4.47652e-16
GO TERM: BP	GO:0019080~viral gene expression	GO:0019080	viral gene expression	29	7.30479	1.43091e-17	ENSG00000213741, ENSG00000131469, ENSG00000110700, ENSG00000134419, ENSG00000112306, ENSG00000265681, ENSG00000197756, ENSG00000171863, ENSG00000163682, ENSG00000171858, ENSG00000198918, ENSG00000156482, ENSG00000109475, ENSG00000137818, ENSG00000118181, ENSG00000008988, ENSG00000241343, ENSG00000233927, ENSG00000197958, ENSG00000145425, ENSG00000114391, ENSG00000166441, ENSG00000231500, ENSG0000…	276	244	19277	8.30116	3.4619e-15
GO TERM: BP	GO:1901566~organonitrogen compound biosynthetic process	GO:1901566	organonitrogen compound biosynthetic process	82	20.6549	2.50776e-17	ENSG00000158406, ENSG00000153234, ENSG00000213741, ENSG00000163319, ENSG00000243678, ENSG00000110700, ENSG00000115758, ENSG00000116649, ENSG00000169020, ENSG00000171421, ENSG00000179988, ENSG00000171863, ENSG00000221493, ENSG00000204316, ENSG00000163682, ENSG00000171858, ENSG00000005100, ENSG00000207547, ENSG00000275714, ENSG00000124279, ENSG00000109475, ENSG00000095059, ENSG00000198015, ENSG0000…	276	2124	19277	2.69643	5.71032e-15
GO TERM: CC	GO:0022627~cytosolic small ribosomal subunit	GO:0022627	cytosolic small ribosomal subunit	16	4.03023	9.57669e-17	ENSG00000213741, ENSG00000118181, ENSG00000110700, ENSG00000134419, ENSG00000112306, ENSG00000008988, ENSG00000171863, ENSG00000233927, ENSG00000145425, ENSG00000171858, ENSG00000185088, ENSG00000231500, ENSG00000143947, ENSG00000164587, ENSG00000182774, ENSG00000142534	266	45	17223	23.0216	6.73105e-15
GO TERM: BP	GO:0044033~multi-organism metabolic process	GO:0044033	multi-organism metabolic process	29	7.30479	2.24285e-16	ENSG00000213741, ENSG00000131469, ENSG00000110700, ENSG00000134419, ENSG00000112306, ENSG00000265681, ENSG00000197756, ENSG00000171863, ENSG00000163682, ENSG00000171858, ENSG00000198918, ENSG00000156482, ENSG00000109475, ENSG00000137818, ENSG00000118181, ENSG00000008988, ENSG00000241343, ENSG00000233927, ENSG00000197958, ENSG00000145425, ENSG00000114391, ENSG00000166441, ENSG00000231500, ENSG0000…	276	271	19277	7.4741	4.82337e-14
GO TERM: CC	GO:0015935~small ribosomal subunit	GO:0015935	small ribosomal subunit	18	4.53401	9.07504e-16	ENSG00000213741, ENSG00000163319, ENSG00000118181, ENSG00000110700, ENSG00000134419, ENSG00000198015, ENSG00000112306, ENSG00000008988, ENSG00000171863, ENSG00000233927, ENSG00000145425, ENSG00000171858, ENSG00000185088, ENSG00000231500, ENSG00000143947, ENSG00000164587, ENSG00000182774, ENSG00000142534	266	74	17223	15.7495	5.58115e-14
GO TERM: BP	GO:0034655~nucleobase-containing compound catabolic process	GO:0034655	nucleobase-containing compound catabolic process	35	8.81612	4.8214e-16	ENSG00000213741, ENSG00000131469, ENSG00000110700, ENSG00000134419, ENSG00000112306, ENSG00000104408, ENSG00000265681, ENSG00000197756, ENSG00000171863, ENSG00000163682, ENSG00000171858, ENSG00000198918, ENSG00000119705, ENSG00000156482, ENSG00000109475, ENSG00000137818, ENSG00000217930, ENSG00000077348, ENSG00000118181, ENSG00000008988, ENSG00000170222, ENSG00000241343, ENSG00000233927, ENSG0000…	276	428	19277	5.71156	9.82296e-14
GO TERM: MF	GO:0003723~RNA binding	GO:0003723	RNA binding	76	19.1436	6.51882e-16	ENSG00000158406, ENSG00000213741, ENSG00000163319, ENSG00000110700, ENSG00000179988, ENSG00000171863, ENSG00000136810, ENSG00000163682, ENSG00000171858, ENSG00000100902, ENSG00000005100, ENSG00000207547, ENSG00000124279, ENSG00000109475, ENSG00000182004, ENSG00000181019, ENSG00000115946, ENSG00000198015, ENSG00000132382, ENSG00000137876, ENSG00000241343, ENSG00000155846, ENSG00000233927, ENSG0000…	234	2044	16739	2.65978	2.30114e-13
GO TERM: BP	GO:0006364~rRNA processing	GO:0006364	rRNA processing	28	7.0529	1.69831e-15	ENSG00000131469, ENSG00000130810, ENSG00000265681, ENSG00000197756, ENSG00000171863, ENSG00000163682, ENSG00000171858, ENSG00000198918, ENSG00000156482, ENSG00000179041, ENSG00000109475, ENSG00000182841, ENSG00000162851, ENSG00000101361, ENSG00000137818, ENSG00000261236, ENSG00000077348, ENSG00000118181, ENSG00000241343, ENSG00000233927, ENSG00000197958, ENSG00000114391, ENSG00000166441, ENSG0000…	276	268	19277	7.29716	3.28707e-13
GO TERM: BP	GO:1901361~organic cyclic compound catabolic process	GO:1901361	organic cyclic compound catabolic process	38	9.57179	2.02298e-15	ENSG00000213741, ENSG00000131469, ENSG00000110700, ENSG00000134419, ENSG00000112306, ENSG00000104408, ENSG00000265681, ENSG00000197756, ENSG00000171863, ENSG00000111012, ENSG00000163682, ENSG00000171858, ENSG00000198918, ENSG00000119705, ENSG00000156482, ENSG00000109475, ENSG00000137818, ENSG00000217930, ENSG00000077348, ENSG00000118181, ENSG00000008988, ENSG00000170222, ENSG00000241343, ENSG0000…	276	538	19277	4.93323	3.72903e-13
GO TERM: BP	GO:0006412~translation	GO:0006412	translation	60	15.1134	4.24401e-15	ENSG00000158406, ENSG00000213741, ENSG00000163319, ENSG00000110700, ENSG00000171421, ENSG00000179988, ENSG00000171863, ENSG00000221493, ENSG00000204316, ENSG00000163682, ENSG00000171858, ENSG00000005100, ENSG00000207547, ENSG00000275714, ENSG00000124279, ENSG00000109475, ENSG00000095059, ENSG00000198015, ENSG00000137876, ENSG00000241343, ENSG00000134323, ENSG00000233927, ENSG00000197958, ENSG0000…	276	1339	19277	3.12969	7.46753e-13
GO TERM: CC	GO:0015934~large ribosomal subunit	GO:0015934	large ribosomal subunit	20	5.03778	1.43913e-14	ENSG00000137818, ENSG00000131469, ENSG00000198015, ENSG00000137876, ENSG00000171421, ENSG00000241343, ENSG00000265681, ENSG00000197756, ENSG00000136522, ENSG00000204316, ENSG00000197958, ENSG00000163682, ENSG00000198918, ENSG00000114391, ENSG00000166441, ENSG00000156482, ENSG00000106591, ENSG00000109475, ENSG00000161970, ENSG00000122026	266	116	17223	11.1635	7.86726e-13
GO TERM: BP	GO:0043604~amide biosynthetic process	GO:0043604	amide biosynthetic process	63	15.869	5.07286e-15	ENSG00000158406, ENSG00000213741, ENSG00000163319, ENSG00000110700, ENSG00000171421, ENSG00000179988, ENSG00000171863, ENSG00000221493, ENSG00000204316, ENSG00000163682, ENSG00000171858, ENSG00000005100, ENSG00000207547, ENSG00000275714, ENSG00000124279, ENSG00000109475, ENSG00000095059, ENSG00000198015, ENSG00000137876, ENSG00000241343, ENSG00000134323, ENSG00000233927, ENSG00000197958, ENSG0000…	276	1468	19277	2.9974	8.53784e-13
GO TERM: BP	GO:0043043~peptide biosynthetic process	GO:0043043	peptide biosynthetic process	60	15.1134	1.09128e-14	ENSG00000158406, ENSG00000213741, ENSG00000163319, ENSG00000110700, ENSG00000171421, ENSG00000179988, ENSG00000171863, ENSG00000221493, ENSG00000204316, ENSG00000163682, ENSG00000171858, ENSG00000005100, ENSG00000207547, ENSG00000275714, ENSG00000124279, ENSG00000109475, ENSG00000095059, ENSG00000198015, ENSG00000137876, ENSG00000241343, ENSG00000134323, ENSG00000233927, ENSG00000197958, ENSG0000…	276	1368	19277	3.06334	1.76015e-12
GO TERM: BP	GO:0090150~establishment of protein localization to membrane	GO:0090150	establishment of protein localization to membrane	32	8.06045	1.3072e-14	ENSG00000213741, ENSG00000131469, ENSG00000110700, ENSG00000134419, ENSG00000112306, ENSG00000265681, ENSG00000197756, ENSG00000171863, ENSG00000163682, ENSG00000171858, ENSG00000198918, ENSG00000168993, ENSG00000156482, ENSG00000126953, ENSG00000109475, ENSG00000137818, ENSG00000118181, ENSG00000008988, ENSG00000241343, ENSG00000233927, ENSG00000197958, ENSG00000145425, ENSG00000114391, ENSG0000…	276	395	19277	5.65826	2.02407e-12
GO TERM: BP	GO:0046700~heterocycle catabolic process	GO:0046700	heterocycle catabolic process	35	8.81612	1.87001e-14	ENSG00000213741, ENSG00000131469, ENSG00000110700, ENSG00000134419, ENSG00000112306, ENSG00000104408, ENSG00000265681, ENSG00000197756, ENSG00000171863, ENSG00000163682, ENSG00000171858, ENSG00000198918, ENSG00000119705, ENSG00000156482, ENSG00000109475, ENSG00000137818, ENSG00000217930, ENSG00000077348, ENSG00000118181, ENSG00000008988, ENSG00000170222, ENSG00000241343, ENSG00000233927, ENSG0000…	276	486	19277	5.02993	2.78415e-12
GO TERM: BP	GO:0044270~cellular nitrogen compound catabolic process	GO:0044270	cellular nitrogen compound catabolic process	35	8.81612	2.24025e-14	ENSG00000213741, ENSG00000131469, ENSG00000110700, ENSG00000134419, ENSG00000112306, ENSG00000104408, ENSG00000265681, ENSG00000197756, ENSG00000171863, ENSG00000163682, ENSG00000171858, ENSG00000198918, ENSG00000119705, ENSG00000156482, ENSG00000109475, ENSG00000137818, ENSG00000217930, ENSG00000077348, ENSG00000118181, ENSG00000008988, ENSG00000170222, ENSG00000241343, ENSG00000233927, ENSG0000…	276	489	19277	4.99907	3.21185e-12
GO TERM: BP	GO:0072594~establishment of protein localization to organelle	GO:0072594	establishment of protein localization to organelle	38	9.57179	3.45171e-14	ENSG00000213741, ENSG00000131469, ENSG00000110700, ENSG00000134419, ENSG00000196860, ENSG00000112306, ENSG00000265681, ENSG00000197756, ENSG00000171863, ENSG00000175768, ENSG00000164077, ENSG00000163682, ENSG00000171858, ENSG00000198918, ENSG00000084734, ENSG00000156482, ENSG00000126953, ENSG00000109475, ENSG00000137818, ENSG00000217930, ENSG00000118181, ENSG00000008988, ENSG00000241343, ENSG0000…	276	589	19277	4.50608	4.77199e-12
GO TERM: BP	GO:0016072~rRNA metabolic process	GO:0016072	rRNA metabolic process	28	7.0529	4.40024e-14	ENSG00000131469, ENSG00000130810, ENSG00000265681, ENSG00000197756, ENSG00000171863, ENSG00000163682, ENSG00000171858, ENSG00000198918, ENSG00000156482, ENSG00000179041, ENSG00000109475, ENSG00000182841, ENSG00000162851, ENSG00000101361, ENSG00000137818, ENSG00000261236, ENSG00000077348, ENSG00000118181, ENSG00000241343, ENSG00000233927, ENSG00000197958, ENSG00000114391, ENSG00000166441, ENSG0000…	276	306	19277	6.39097	5.81952e-12
GO TERM: BP	GO:0019439~aromatic compound catabolic process	GO:0019439	aromatic compound catabolic process	35	8.81612	4.51009e-14	ENSG00000213741, ENSG00000131469, ENSG00000110700, ENSG00000134419, ENSG00000112306, ENSG00000104408, ENSG00000265681, ENSG00000197756, ENSG00000171863, ENSG00000163682, ENSG00000171858, ENSG00000198918, ENSG00000119705, ENSG00000156482, ENSG00000109475, ENSG00000137818, ENSG00000217930, ENSG00000077348, ENSG00000118181, ENSG00000008988, ENSG00000170222, ENSG00000241343, ENSG00000233927, ENSG0000…	276	501	19277	4.87934	5.81952e-12
GO TERM: CC	GO:0022625~cytosolic large ribosomal subunit	GO:0022625	cytosolic large ribosomal subunit	15	3.77834	2.12097e-13	ENSG00000137818, ENSG00000131469, ENSG00000137876, ENSG00000241343, ENSG00000265681, ENSG00000197756, ENSG00000197958, ENSG00000163682, ENSG00000198918, ENSG00000114391, ENSG00000166441, ENSG00000156482, ENSG00000109475, ENSG00000161970, ENSG00000122026	266	59	17223	16.4614	1.04352e-11
GO TERM: BP	GO:0006605~protein targeting	GO:0006605	protein targeting	38	9.57179	2.22825e-13	ENSG00000213741, ENSG00000131469, ENSG00000110700, ENSG00000134419, ENSG00000196860, ENSG00000112306, ENSG00000265681, ENSG00000197756, ENSG00000171863, ENSG00000175768, ENSG00000164077, ENSG00000163682, ENSG00000171858, ENSG00000198918, ENSG00000084734, ENSG00000156482, ENSG00000126953, ENSG00000109475, ENSG00000137818, ENSG00000217930, ENSG00000118181, ENSG00000008988, ENSG00000241343, ENSG0000…	276	626	19277	4.23974	2.78243e-11
GO TERM: BP	GO:0006518~peptide metabolic process	GO:0006518	peptide metabolic process	62	15.6171	2.40202e-13	ENSG00000158406, ENSG00000213741, ENSG00000163319, ENSG00000110700, ENSG00000171421, ENSG00000179988, ENSG00000171863, ENSG00000221493, ENSG00000204316, ENSG00000163682, ENSG00000171858, ENSG00000005100, ENSG00000207547, ENSG00000275714, ENSG00000124279, ENSG00000109475, ENSG00000095059, ENSG00000198015, ENSG00000137876, ENSG00000241343, ENSG00000134323, ENSG00000233927, ENSG00000197958, ENSG0000…	276	1555	19277	2.78478	2.90569e-11
GO TERM: BP	GO:0043603~cellular amide metabolic process	GO:0043603	cellular amide metabolic process	66	16.6247	1.1887e-12	ENSG00000158406, ENSG00000213741, ENSG00000163319, ENSG00000110700, ENSG00000171421, ENSG00000179988, ENSG00000171863, ENSG00000221493, ENSG00000204316, ENSG00000163682, ENSG00000171858, ENSG00000005100, ENSG00000207547, ENSG00000275714, ENSG00000124279, ENSG00000109475, ENSG00000095059, ENSG00000198015, ENSG00000137876, ENSG00000241343, ENSG00000134323, ENSG00000233927, ENSG00000197958, ENSG0000…	276	1793	19277	2.57095	1.39439e-10
GO TERM: BP	GO:0034470~ncRNA processing	GO:0034470	ncRNA processing	30	7.55668	1.01971e-11	ENSG00000131469, ENSG00000130810, ENSG00000265681, ENSG00000197756, ENSG00000171863, ENSG00000163682, ENSG00000171858, ENSG00000198918, ENSG00000156482, ENSG00000179041, ENSG00000109475, ENSG00000182841, ENSG00000162851, ENSG00000141994, ENSG00000101361, ENSG00000137818, ENSG00000261236, ENSG00000077348, ENSG00000118181, ENSG00000241343, ENSG00000233927, ENSG00000197958, ENSG00000114391, ENSG0000…	276	445	19277	4.7086	1.16097e-09
GO TERM: MF	GO:0005198~structural molecule activity	GO:0005198	structural molecule activity	39	9.82368	1.91107e-11	ENSG00000213741, ENSG00000131469, ENSG00000163319, ENSG00000110700, ENSG00000134419, ENSG00000112306, ENSG00000171421, ENSG00000265681, ENSG00000197756, ENSG00000171863, ENSG00000163682, ENSG00000171858, ENSG00000163584, ENSG00000198918, ENSG00000156482, ENSG00000109475, ENSG00000137818, ENSG00000118181, ENSG00000198015, ENSG00000008988, ENSG00000137876, ENSG00000241343, ENSG00000136522, ENSG0000…	234	790	16739	3.53143	4.49737e-09
GO TERM: BP	GO:0019058~viral life cycle	GO:0019058	viral life cycle	33	8.31234	9.40304e-11	ENSG00000213741, ENSG00000158406, ENSG00000131469, ENSG00000276180, ENSG00000110700, ENSG00000134419, ENSG00000112306, ENSG00000265681, ENSG00000208772, ENSG00000197756, ENSG00000171863, ENSG00000163682, ENSG00000171858, ENSG00000198918, ENSG00000156482, ENSG00000109475, ENSG00000137818, ENSG00000118181, ENSG00000008988, ENSG00000241343, ENSG00000233927, ENSG00000197958, ENSG00000145425, ENSG0000…	276	589	19277	3.91317	1.03998e-08
GO TERM: BP	GO:0072657~protein localization to membrane	GO:0072657	protein localization to membrane	36	9.06801	1.36244e-10	ENSG00000213741, ENSG00000131469, ENSG00000110700, ENSG00000134419, ENSG00000112306, ENSG00000265681, ENSG00000197756, ENSG00000171863, ENSG00000189056, ENSG00000163682, ENSG00000171858, ENSG00000198918, ENSG00000188763, ENSG00000168993, ENSG00000156482, ENSG00000126953, ENSG00000109475, ENSG00000088992, ENSG00000106541, ENSG00000137818, ENSG00000118181, ENSG00000008988, ENSG00000241343, ENSG0000…	276	705	19277	3.56651	1.465e-08
GO TERM: BP	GO:0006396~RNA processing	GO:0006396	RNA processing	55	13.8539	3.64867e-10	ENSG00000199753, ENSG00000110700, ENSG00000171863, ENSG00000163682, ENSG00000171858, ENSG00000124279, ENSG00000109475, ENSG00000175061, ENSG00000182004, ENSG00000212493, ENSG00000182841, ENSG00000221539, ENSG00000241343, ENSG00000134323, ENSG00000233927, ENSG00000197958, ENSG00000201512, ENSG00000166441, ENSG00000206885, ENSG00000164587, ENSG00000122026, ENSG00000131469, ENSG00000130810, ENSG0000…	276	1526	19277	2.51732	3.8173e-08
GO TERM: BP	GO:0034660~ncRNA metabolic process	GO:0034660	ncRNA metabolic process	33	8.31234	5.75607e-10	ENSG00000131469, ENSG00000130810, ENSG00000265681, ENSG00000179988, ENSG00000197756, ENSG00000171863, ENSG00000163682, ENSG00000171858, ENSG00000198918, ENSG00000156482, ENSG00000179041, ENSG00000109475, ENSG00000182841, ENSG00000162851, ENSG00000141994, ENSG00000101361, ENSG00000137818, ENSG00000261236, ENSG00000077348, ENSG00000118181, ENSG00000247626, ENSG00000241343, ENSG00000233927, ENSG0000…	276	633	19277	3.64117	5.86361e-08
GO TERM: BP	GO:0016071~mRNA metabolic process	GO:0016071	mRNA metabolic process	38	9.57179	7.59474e-10	ENSG00000213741, ENSG00000131469, ENSG00000110700, ENSG00000134419, ENSG00000112306, ENSG00000104408, ENSG00000265681, ENSG00000197756, ENSG00000171863, ENSG00000163682, ENSG00000171858, ENSG00000198918, ENSG00000143977, ENSG00000108561, ENSG00000156482, ENSG00000109475, ENSG00000182004, ENSG00000275895, ENSG00000172062, ENSG00000137818, ENSG00000077348, ENSG00000118181, ENSG00000111424, ENSG0000…	276	829	19277	3.20154	7.53827e-08
GO TERM: CC	GO:0005740~mitochondrial envelope	GO:0005740	mitochondrial envelope	38	9.57179	5.58441e-09	ENSG00000004779, ENSG00000163319, ENSG00000243678, ENSG00000196860, ENSG00000115657, ENSG00000169020, ENSG00000171421, ENSG00000198888, ENSG00000171202, ENSG00000198804, ENSG00000175768, ENSG00000111012, ENSG00000204316, ENSG00000198938, ENSG00000173915, ENSG00000188763, ENSG00000159199, ENSG00000036473, ENSG00000168275, ENSG00000126953, ENSG00000123545, ENSG00000258674, ENSG00000239672, ENSG0000…	266	830	17223	2.96437	2.49775e-07
GO TERM: CC	GO:0031966~mitochondrial membrane	GO:0031966	mitochondrial membrane	36	9.06801	1.21202e-08	ENSG00000004779, ENSG00000163319, ENSG00000243678, ENSG00000196860, ENSG00000115657, ENSG00000169020, ENSG00000171421, ENSG00000198888, ENSG00000171202, ENSG00000198804, ENSG00000175768, ENSG00000111012, ENSG00000204316, ENSG00000198938, ENSG00000173915, ENSG00000188763, ENSG00000159199, ENSG00000036473, ENSG00000126953, ENSG00000123545, ENSG00000258674, ENSG00000239672, ENSG00000185818, ENSG0000…	266	778	17223	2.99606	4.96929e-07
GO TERM: CC	GO:0005730~nucleolus	GO:0005730	nucleolus	52	13.0982	1.73792e-08	ENSG00000199753, ENSG00000110700, ENSG00000171863, ENSG00000135763, ENSG00000005100, ENSG00000175061, ENSG00000212493, ENSG00000182841, ENSG00000221539, ENSG00000102760, ENSG00000115946, ENSG00000198498, ENSG00000132382, ENSG00000137876, ENSG00000134323, ENSG00000197958, ENSG00000173846, ENSG00000203772, ENSG00000201512, ENSG00000124802, ENSG00000206885, ENSG00000143947, ENSG00000164587, ENSG0000…	266	1450	17223	2.322	6.57735e-07
GO TERM: CC	GO:0098798~mitochondrial protein complex	GO:0098798	mitochondrial protein complex	17	4.28212	2.84344e-08	ENSG00000004779, ENSG00000217930, ENSG00000196860, ENSG00000228253, ENSG00000198712, ENSG00000169020, ENSG00000198888, ENSG00000198899, ENSG00000131174, ENSG00000198804, ENSG00000175768, ENSG00000198938, ENSG00000173915, ENSG00000189043, ENSG00000159199, ENSG00000147684, ENSG00000241837	266	185	17223	5.94983	9.99264e-07
GO TERM: CC	GO:0044429~mitochondrial part	GO:0044429	mitochondrial part	44	11.0831	4.26165e-08	ENSG00000004779, ENSG00000163319, ENSG00000243678, ENSG00000196860, ENSG00000115657, ENSG00000169020, ENSG00000171421, ENSG00000198888, ENSG00000171202, ENSG00000198804, ENSG00000175768, ENSG00000111012, ENSG00000204316, ENSG00000198938, ENSG00000173915, ENSG00000188763, ENSG00000159199, ENSG00000036473, ENSG00000168275, ENSG00000108561, ENSG00000126953, ENSG00000124279, ENSG00000123545, ENSG0000…	266	1142	17223	2.49467	1.39782e-06
GO TERM: BP	GO:0006886~intracellular protein transport	GO:0006886	intracellular protein transport	44	11.0831	2.08106e-08	ENSG00000213741, ENSG00000131469, ENSG00000110700, ENSG00000134419, ENSG00000196860, ENSG00000112306, ENSG00000265681, ENSG00000197756, ENSG00000171863, ENSG00000136810, ENSG00000175768, ENSG00000135521, ENSG00000164077, ENSG00000111490, ENSG00000163682, ENSG00000171858, ENSG00000198918, ENSG00000084734, ENSG00000156482, ENSG00000126953, ENSG00000179041, ENSG00000109475, ENSG00000180667, ENSG0000…	276	1199	19277	2.56309	2.01395e-06
GO TERM: BP	GO:0033365~protein localization to organelle	GO:0033365	protein localization to organelle	40	10.0756	2.21745e-08	ENSG00000213741, ENSG00000131469, ENSG00000110700, ENSG00000134419, ENSG00000196860, ENSG00000112306, ENSG00000265681, ENSG00000197756, ENSG00000171863, ENSG00000175768, ENSG00000164077, ENSG00000163682, ENSG00000171858, ENSG00000198918, ENSG00000084734, ENSG00000156482, ENSG00000126953, ENSG00000179041, ENSG00000162413, ENSG00000109475, ENSG00000137818, ENSG00000217930, ENSG00000118181, ENSG0000…	276	1026	19277	2.72297	2.0936e-06
GO TERM: CC	GO:0098800~inner mitochondrial membrane protein complex	GO:0098800	inner mitochondrial membrane protein complex	15	3.77834	7.55264e-08	ENSG00000004779, ENSG00000217930, ENSG00000228253, ENSG00000198712, ENSG00000169020, ENSG00000198888, ENSG00000198899, ENSG00000131174, ENSG00000198804, ENSG00000198938, ENSG00000173915, ENSG00000189043, ENSG00000159199, ENSG00000147684, ENSG00000241837	266	149	17223	6.51827	2.32244e-06
GO TERM: CC	GO:0005743~mitochondrial inner membrane	GO:0005743	mitochondrial inner membrane	27	6.80101	1.06574e-07	ENSG00000004779, ENSG00000163319, ENSG00000169020, ENSG00000171421, ENSG00000198888, ENSG00000171202, ENSG00000198804, ENSG00000204316, ENSG00000198938, ENSG00000173915, ENSG00000159199, ENSG00000036473, ENSG00000126953, ENSG00000123545, ENSG00000258674, ENSG00000217930, ENSG00000198015, ENSG00000228253, ENSG00000198899, ENSG00000198712, ENSG00000131174, ENSG00000242114, ENSG00000136522, ENSG0000…	266	513	17223	3.4078	3.08437e-06
GO TERM: BP	GO:0046907~intracellular transport	GO:0046907	intracellular transport	58	14.6096	5.06791e-08	ENSG00000213741, ENSG00000110700, ENSG00000169020, ENSG00000171863, ENSG00000136810, ENSG00000135521, ENSG00000163682, ENSG00000171858, ENSG00000084734, ENSG00000109475, ENSG00000182004, ENSG00000217930, ENSG00000228253, ENSG00000198899, ENSG00000241343, ENSG00000132661, ENSG00000173898, ENSG00000233927, ENSG00000197958, ENSG00000173846, ENSG00000203772, ENSG00000102879, ENSG00000186198, ENSG0000…	276	1907	19277	2.12426	4.67092e-06
GO TERM: CC	GO:0019866~organelle inner membrane	GO:0019866	organelle inner membrane	28	7.0529	2.77306e-07	ENSG00000004779, ENSG00000163319, ENSG00000169020, ENSG00000171421, ENSG00000198888, ENSG00000171202, ENSG00000198804, ENSG00000204316, ENSG00000198938, ENSG00000173915, ENSG00000159199, ENSG00000036473, ENSG00000126953, ENSG00000123545, ENSG00000258674, ENSG00000217930, ENSG00000198015, ENSG00000228253, ENSG00000198899, ENSG00000198712, ENSG00000131174, ENSG00000242114, ENSG00000136522, ENSG0000…	266	575	17223	3.15295	7.57969e-06
GO TERM: BP	GO:0042274~ribosomal small subunit biogenesis	GO:0042274	ribosomal small subunit biogenesis	11	2.77078	1.23571e-07	ENSG00000233927, ENSG00000171858, ENSG00000185088, ENSG00000118181, ENSG00000179041, ENSG00000124787, ENSG00000164587, ENSG00000171863, ENSG00000182774, ENSG00000182841, ENSG00000135521	276	76	19277	10.109	1.11242e-05
GO TERM: CC	GO:0005739~mitochondrion	GO:0005739	mitochondrion	55	13.8539	4.54671e-07	ENSG00000004779, ENSG00000163319, ENSG00000243678, ENSG00000169020, ENSG00000171421, ENSG00000198938, ENSG00000204316, ENSG00000173915, ENSG00000084734, ENSG00000124279, ENSG00000123545, ENSG00000141378, ENSG00000185818, ENSG00000217930, ENSG00000198015, ENSG00000228253, ENSG00000198899, ENSG00000155846, ENSG00000131174, ENSG00000242114, ENSG00000188130, ENSG00000143947, ENSG00000106591, ENSG0000…	266	1749	17223	2.0361	1.17736e-05
GO TERM: MF	GO:0003676~nucleic acid binding	GO:0003676	nucleic acid binding	100	25.1889	6.77378e-08	ENSG00000110700, ENSG00000197774, ENSG00000136810, ENSG00000100902, ENSG00000005100, ENSG00000207547, ENSG00000169740, ENSG00000124279, ENSG00000163884, ENSG00000181218, ENSG00000176165, ENSG00000115946, ENSG00000137876, ENSG00000241343, ENSG00000155846, ENSG00000060138, ENSG00000102879, ENSG00000164587, ENSG00000122026, ENSG00000142534, ENSG00000121211, ENSG00000131469, ENSG00000130810, ENSG0000…	234	4425	16739	1.61659	1.19557e-05
GO TERM: CC	GO:0044455~mitochondrial membrane part	GO:0044455	mitochondrial membrane part	18	4.53401	9.70226e-07	ENSG00000004779, ENSG00000217930, ENSG00000196860, ENSG00000115657, ENSG00000228253, ENSG00000198712, ENSG00000169020, ENSG00000198888, ENSG00000198899, ENSG00000131174, ENSG00000198804, ENSG00000175768, ENSG00000198938, ENSG00000173915, ENSG00000189043, ENSG00000159199, ENSG00000147684, ENSG00000241837	266	269	17223	4.33259	2.38676e-05
GO TERM: BP	GO:0042255~ribosome assembly	GO:0042255	ribosome assembly	10	2.51889	3.90492e-07	ENSG00000233927, ENSG00000261236, ENSG00000130810, ENSG00000114391, ENSG00000185088, ENSG00000108561, ENSG00000179041, ENSG00000137876, ENSG00000164587, ENSG00000182841	276	66	19277	10.5825	3.43544e-05
GO TERM: CC	GO:0031975~envelope	GO:0031975	envelope	43	10.8312	2.8165e-06	ENSG00000132359, ENSG00000004779, ENSG00000163319, ENSG00000243678, ENSG00000196860, ENSG00000115657, ENSG00000169020, ENSG00000171421, ENSG00000198888, ENSG00000136997, ENSG00000171202, ENSG00000198804, ENSG00000175768, ENSG00000111012, ENSG00000204316, ENSG00000198938, ENSG00000173915, ENSG00000188763, ENSG00000159199, ENSG00000036473, ENSG00000168275, ENSG00000126953, ENSG00000123545, ENSG0000…	266	1288	17223	2.16162	6.29873e-05
GO TERM: CC	GO:0031967~organelle envelope	GO:0031967	organelle envelope	43	10.8312	2.8165e-06	ENSG00000132359, ENSG00000004779, ENSG00000163319, ENSG00000243678, ENSG00000196860, ENSG00000115657, ENSG00000169020, ENSG00000171421, ENSG00000198888, ENSG00000136997, ENSG00000171202, ENSG00000198804, ENSG00000175768, ENSG00000111012, ENSG00000204316, ENSG00000198938, ENSG00000173915, ENSG00000188763, ENSG00000159199, ENSG00000036473, ENSG00000168275, ENSG00000126953, ENSG00000123545, ENSG0000…	266	1288	17223	2.16162	6.29873e-05
GO TERM: BP	GO:0009205~purine ribonucleoside triphosphate metabolic process	GO:0009205	purine ribonucleoside triphosphate metabolic process	20	5.03778	1.02749e-06	ENSG00000264424, ENSG00000004779, ENSG00000243678, ENSG00000228253, ENSG00000198712, ENSG00000169020, ENSG00000198888, ENSG00000198899, ENSG00000131174, ENSG00000136997, ENSG00000198804, ENSG00000198938, ENSG00000084734, ENSG00000189043, ENSG00000159199, ENSG00000168275, ENSG00000147684, ENSG00000241837, ENSG00000239672, ENSG00000106992	276	358	19277	3.90191	8.83872e-05
GO TERM: BP	GO:0009144~purine nucleoside triphosphate metabolic process	GO:0009144	purine nucleoside triphosphate metabolic process	20	5.03778	1.26709e-06	ENSG00000264424, ENSG00000004779, ENSG00000243678, ENSG00000228253, ENSG00000198712, ENSG00000169020, ENSG00000198888, ENSG00000198899, ENSG00000131174, ENSG00000136997, ENSG00000198804, ENSG00000198938, ENSG00000084734, ENSG00000189043, ENSG00000159199, ENSG00000168275, ENSG00000147684, ENSG00000241837, ENSG00000239672, ENSG00000106992	276	363	19277	3.84817	0.000106628
GO TERM: BP	GO:0009199~ribonucleoside triphosphate metabolic process	GO:0009199	ribonucleoside triphosphate metabolic process	20	5.03778	1.37029e-06	ENSG00000264424, ENSG00000004779, ENSG00000243678, ENSG00000228253, ENSG00000198712, ENSG00000169020, ENSG00000198888, ENSG00000198899, ENSG00000131174, ENSG00000136997, ENSG00000198804, ENSG00000198938, ENSG00000084734, ENSG00000189043, ENSG00000159199, ENSG00000168275, ENSG00000147684, ENSG00000241837, ENSG00000239672, ENSG00000106992	276	365	19277	3.82708	0.000112859
GO TERM: BP	GO:0044265~cellular macromolecule catabolic process	GO:0044265	cellular macromolecule catabolic process	39	9.82368	1.97257e-06	ENSG00000213741, ENSG00000131469, ENSG00000163638, ENSG00000110700, ENSG00000134419, ENSG00000112306, ENSG00000104408, ENSG00000265681, ENSG00000197756, ENSG00000171863, ENSG00000163682, ENSG00000171858, ENSG00000198918, ENSG00000100902, ENSG00000119705, ENSG00000156482, ENSG00000109475, ENSG00000180667, ENSG00000137818, ENSG00000217930, ENSG00000077348, ENSG00000118181, ENSG00000008988, ENSG0000…	276	1175	19277	2.31823	0.00015908
GO TERM: CC	GO:0042788~polysomal ribosome	GO:0042788	polysomal ribosome	7	1.76322	9.79691e-06	ENSG00000233927, ENSG00000213741, ENSG00000171858, ENSG00000198918, ENSG00000114391, ENSG00000156482, ENSG00000241343	266	33	17223	13.7344	0.000209569
GO TERM: BP	GO:0009141~nucleoside triphosphate metabolic process	GO:0009141	nucleoside triphosphate metabolic process	20	5.03778	2.76749e-06	ENSG00000264424, ENSG00000004779, ENSG00000243678, ENSG00000228253, ENSG00000198712, ENSG00000169020, ENSG00000198888, ENSG00000198899, ENSG00000131174, ENSG00000136997, ENSG00000198804, ENSG00000198938, ENSG00000084734, ENSG00000189043, ENSG00000159199, ENSG00000168275, ENSG00000147684, ENSG00000241837, ENSG00000239672, ENSG00000106992	276	383	19277	3.64722	0.000218632
GO TERM: BP	GO:0051649~establishment of localization in cell	GO:0051649	establishment of localization in cell	60	15.1134	4.02267e-06	ENSG00000213741, ENSG00000110700, ENSG00000169020, ENSG00000171863, ENSG00000136810, ENSG00000135521, ENSG00000163682, ENSG00000171858, ENSG00000084734, ENSG00000109475, ENSG00000182004, ENSG00000217930, ENSG00000228253, ENSG00000198899, ENSG00000241343, ENSG00000132661, ENSG00000173898, ENSG00000233927, ENSG00000197958, ENSG00000167014, ENSG00000173846, ENSG00000203772, ENSG00000102879, ENSG0000…	276	2288	19277	1.83158	0.000311435
GO TERM: BP	GO:0046034~ATP metabolic process	GO:0046034	ATP metabolic process	18	4.53401	5.00509e-06	ENSG00000264424, ENSG00000004779, ENSG00000228253, ENSG00000198712, ENSG00000169020, ENSG00000198888, ENSG00000198899, ENSG00000131174, ENSG00000136997, ENSG00000198804, ENSG00000198938, ENSG00000084734, ENSG00000189043, ENSG00000159199, ENSG00000168275, ENSG00000147684, ENSG00000241837, ENSG00000106992	276	327	19277	3.84464	0.000379896
GO TERM: BP	GO:0009142~nucleoside triphosphate biosynthetic process	GO:0009142	nucleoside triphosphate biosynthetic process	10	2.51889	5.5296e-06	ENSG00000243678, ENSG00000159199, ENSG00000228253, ENSG00000198712, ENSG00000169020, ENSG00000198899, ENSG00000241837, ENSG00000136997, ENSG00000239672, ENSG00000106992	276	90	19277	7.76047	0.000411636
GO TERM: BP	GO:0016032~viral process	GO:0016032	viral process	40	10.0756	6.21633e-06	ENSG00000213741, ENSG00000158406, ENSG00000131469, ENSG00000276180, ENSG00000115758, ENSG00000110700, ENSG00000134419, ENSG00000112306, ENSG00000113356, ENSG00000265681, ENSG00000208772, ENSG00000197756, ENSG00000171863, ENSG00000134853, ENSG00000163682, ENSG00000171858, ENSG00000198918, ENSG00000108561, ENSG00000156482, ENSG00000109475, ENSG00000161960, ENSG00000123545, ENSG00000137818, ENSG0000…	276	1283	19277	2.17753	0.000454027
GO TERM: BP	GO:0010605~negative regulation of macromolecule metabolic process	GO:0010605	negative regulation of macromolecule metabolic process	80	20.1511	7.83087e-06	ENSG00000158406, ENSG00000153234, ENSG00000213741, ENSG00000180573, ENSG00000110700, ENSG00000171863, ENSG00000136810, ENSG00000221493, ENSG00000163682, ENSG00000171858, ENSG00000184260, ENSG00000172428, ENSG00000207547, ENSG00000275714, ENSG00000109475, ENSG00000018869, ENSG00000181218, ENSG00000163884, ENSG00000185238, ENSG00000141378, ENSG00000176165, ENSG00000217930, ENSG00000111424, ENSG0000…	276	3473	19277	1.60885	0.000561358
GO TERM: CC	GO:0005753~mitochondrial proton-transporting ATP synthase complex	GO:0005753	mitochondrial proton-transporting ATP synthase complex	6	1.51134	2.77775e-05	ENSG00000173915, ENSG00000159199, ENSG00000228253, ENSG00000169020, ENSG00000198899, ENSG00000241837	266	24	17223	16.187	0.000569439
GO TERM: BP	GO:0009206~purine ribonucleoside triphosphate biosynthetic process	GO:0009206	purine ribonucleoside triphosphate biosynthetic process	9	2.267	8.41805e-06	ENSG00000243678, ENSG00000159199, ENSG00000228253, ENSG00000198712, ENSG00000169020, ENSG00000198899, ENSG00000241837, ENSG00000136997, ENSG00000239672	276	72	19277	8.73053	0.000592478
GO TERM: BP	GO:0044764~multi-organism cellular process	GO:0044764	multi-organism cellular process	40	10.0756	8.70502e-06	ENSG00000213741, ENSG00000158406, ENSG00000131469, ENSG00000276180, ENSG00000115758, ENSG00000110700, ENSG00000134419, ENSG00000112306, ENSG00000113356, ENSG00000265681, ENSG00000208772, ENSG00000197756, ENSG00000171863, ENSG00000134853, ENSG00000163682, ENSG00000171858, ENSG00000198918, ENSG00000108561, ENSG00000156482, ENSG00000109475, ENSG00000161960, ENSG00000123545, ENSG00000137818, ENSG0000…	276	1302	19277	2.14575	0.000601734
GO TERM: BP	GO:0009145~purine nucleoside triphosphate biosynthetic process	GO:0009145	purine nucleoside triphosphate biosynthetic process	9	2.267	9.33857e-06	ENSG00000243678, ENSG00000159199, ENSG00000228253, ENSG00000198712, ENSG00000169020, ENSG00000198899, ENSG00000241837, ENSG00000136997, ENSG00000239672	276	73	19277	8.61093	0.000634204
GO TERM: MF	GO:0019843~rRNA binding	GO:0019843	rRNA binding	9	2.267	4.50135e-06	ENSG00000197958, ENSG00000163682, ENSG00000130810, ENSG00000163319, ENSG00000231500, ENSG00000110700, ENSG00000179041, ENSG00000164587, ENSG00000142534	234	68	16739	9.46776	0.000635591
GO TERM: CC	GO:0070469~respiratory chain	GO:0070469	respiratory chain	10	2.51889	3.24322e-05	ENSG00000198938, ENSG00000004779, ENSG00000189043, ENSG00000168275, ENSG00000198712, ENSG00000198888, ENSG00000131174, ENSG00000147684, ENSG00000258674, ENSG00000198804	266	104	17223	6.22578	0.000638266
GO TERM: BP	GO:0009892~negative regulation of metabolic process	GO:0009892	negative regulation of metabolic process	84	21.1587	9.67179e-06	ENSG00000158406, ENSG00000153234, ENSG00000213741, ENSG00000180573, ENSG00000110700, ENSG00000171863, ENSG00000136810, ENSG00000221493, ENSG00000163682, ENSG00000171858, ENSG00000184260, ENSG00000172428, ENSG00000084734, ENSG00000207547, ENSG00000275714, ENSG00000109475, ENSG00000018869, ENSG00000181218, ENSG00000163884, ENSG00000185238, ENSG00000141378, ENSG00000176165, ENSG00000217930, ENSG0000…	276	3729	19277	1.57332	0.000645509
GO TERM: CC	GO:0045259~proton-transporting ATP synthase complex	GO:0045259	proton-transporting ATP synthase complex	6	1.51134	4.19207e-05	ENSG00000173915, ENSG00000159199, ENSG00000228253, ENSG00000169020, ENSG00000198899, ENSG00000241837	266	26	17223	14.9419	0.000782268
GO TERM: CC	GO:0000786~nucleosome	GO:0000786	nucleosome	11	2.77078	4.29293e-05	ENSG00000197903, ENSG00000274641, ENSG00000158406, ENSG00000184260, ENSG00000276180, ENSG00000180573, ENSG00000275714, ENSG00000277075, ENSG00000181218, ENSG00000187837, ENSG00000196747	266	134	17223	5.31514	0.000782268
GO TERM: BP	GO:0009201~ribonucleoside triphosphate biosynthetic process	GO:0009201	ribonucleoside triphosphate biosynthetic process	9	2.267	1.53181e-05	ENSG00000243678, ENSG00000159199, ENSG00000228253, ENSG00000198712, ENSG00000169020, ENSG00000198899, ENSG00000241837, ENSG00000136997, ENSG00000239672	276	78	19277	8.05895	0.00100502
GO TERM: BP	GO:0010467~gene expression	GO:0010467	gene expression	134	33.7531	1.57873e-05	ENSG00000110700, ENSG00000171421, ENSG00000136810, ENSG00000204316, ENSG00000100902, ENSG00000157193, ENSG00000005100, ENSG00000207547, ENSG00000169740, ENSG00000124279, ENSG00000175061, ENSG00000182841, ENSG00000163884, ENSG00000181218, ENSG00000169627, ENSG00000102760, ENSG00000176165, ENSG00000095059, ENSG00000137876, ENSG00000241343, ENSG00000155846, ENSG00000060138, ENSG00000173846, ENSG0000…	276	6942	19277	1.34819	0.00101854
GO TERM: BP	GO:0044403~symbiosis, encompassing mutualism through parasitism	GO:0044403	symbiosis, encompassing mutualism through parasitism	40	10.0756	1.64921e-05	ENSG00000213741, ENSG00000158406, ENSG00000131469, ENSG00000276180, ENSG00000115758, ENSG00000110700, ENSG00000134419, ENSG00000112306, ENSG00000113356, ENSG00000265681, ENSG00000208772, ENSG00000197756, ENSG00000171863, ENSG00000134853, ENSG00000163682, ENSG00000171858, ENSG00000198918, ENSG00000108561, ENSG00000156482, ENSG00000109475, ENSG00000161960, ENSG00000123545, ENSG00000137818, ENSG0000…	276	1339	19277	2.08646	0.00104657
GO TERM: CC	GO:0045277~respiratory chain complex IV	GO:0045277	respiratory chain complex IV	6	1.51134	6.1077e-05	ENSG00000198938, ENSG00000189043, ENSG00000168275, ENSG00000198712, ENSG00000131174, ENSG00000198804	266	28	17223	13.8746	0.00107321
GO TERM: CC	GO:0044815~DNA packaging complex	GO:0044815	DNA packaging complex	11	2.77078	7.02368e-05	ENSG00000197903, ENSG00000274641, ENSG00000158406, ENSG00000184260, ENSG00000276180, ENSG00000180573, ENSG00000275714, ENSG00000277075, ENSG00000181218, ENSG00000187837, ENSG00000196747	266	142	17223	5.0157	0.0011916
GO TERM: CC	GO:0005844~polysome	GO:0005844	polysome	8	2.01511	7.46311e-05	ENSG00000233927, ENSG00000213741, ENSG00000171858, ENSG00000198918, ENSG00000100902, ENSG00000114391, ENSG00000156482, ENSG00000241343	266	67	17223	7.73112	0.00122395
GO TERM: BP	GO:0044419~interspecies interaction between organisms	GO:0044419	interspecies interaction between organisms	40	10.0756	1.96661e-05	ENSG00000213741, ENSG00000158406, ENSG00000131469, ENSG00000276180, ENSG00000115758, ENSG00000110700, ENSG00000134419, ENSG00000112306, ENSG00000113356, ENSG00000265681, ENSG00000208772, ENSG00000197756, ENSG00000171863, ENSG00000134853, ENSG00000163682, ENSG00000171858, ENSG00000198918, ENSG00000108561, ENSG00000156482, ENSG00000109475, ENSG00000161960, ENSG00000123545, ENSG00000137818, ENSG0000…	276	1349	19277	2.07099	0.00122786
GO TERM: CC	GO:0098803~respiratory chain complex	GO:0098803	respiratory chain complex	9	2.267	8.62163e-05	ENSG00000198938, ENSG00000004779, ENSG00000189043, ENSG00000168275, ENSG00000198712, ENSG00000198888, ENSG00000131174, ENSG00000147684, ENSG00000198804	266	92	17223	6.33406	0.00136834
GO TERM: BP	GO:0009167~purine ribonucleoside monophosphate metabolic process	GO:0009167	purine ribonucleoside monophosphate metabolic process	18	4.53401	2.60739e-05	ENSG00000264424, ENSG00000004779, ENSG00000228253, ENSG00000198712, ENSG00000169020, ENSG00000198888, ENSG00000198899, ENSG00000131174, ENSG00000136997, ENSG00000198804, ENSG00000198938, ENSG00000084734, ENSG00000189043, ENSG00000159199, ENSG00000168275, ENSG00000147684, ENSG00000241837, ENSG00000106992	276	371	19277	3.38867	0.00157707
GO TERM: BP	GO:0009126~purine nucleoside monophosphate metabolic process	GO:0009126	purine nucleoside monophosphate metabolic process	18	4.53401	2.60739e-05	ENSG00000264424, ENSG00000004779, ENSG00000228253, ENSG00000198712, ENSG00000169020, ENSG00000198888, ENSG00000198899, ENSG00000131174, ENSG00000136997, ENSG00000198804, ENSG00000198938, ENSG00000084734, ENSG00000189043, ENSG00000159199, ENSG00000168275, ENSG00000147684, ENSG00000241837, ENSG00000106992	276	371	19277	3.38867	0.00157707
GO TERM: CC	GO:0045263~proton-transporting ATP synthase complex, coupling factor F(o)	GO:0045263	proton-transporting ATP synthase complex, coupling factor F(o)	5	1.25945	0.000141447	ENSG00000159199, ENSG00000228253, ENSG00000169020, ENSG00000198899, ENSG00000241837	266	18	17223	17.9856	0.00217474
GO TERM: BP	GO:0016070~RNA metabolic process	GO:0016070	RNA metabolic process	110	27.7078	3.90173e-05	ENSG00000110700, ENSG00000136810, ENSG00000100902, ENSG00000157193, ENSG00000005100, ENSG00000169740, ENSG00000124279, ENSG00000175061, ENSG00000182841, ENSG00000163884, ENSG00000181218, ENSG00000102760, ENSG00000176165, ENSG00000241343, ENSG00000155846, ENSG00000060138, ENSG00000173846, ENSG00000164587, ENSG00000122026, ENSG00000142534, ENSG00000131469, ENSG00000130810, ENSG00000277075, ENSG0000…	276	5487	19277	1.40019	0.00232363
GO TERM: BP	GO:0009161~ribonucleoside monophosphate metabolic process	GO:0009161	ribonucleoside monophosphate metabolic process	18	4.53401	4.56646e-05	ENSG00000264424, ENSG00000004779, ENSG00000228253, ENSG00000198712, ENSG00000169020, ENSG00000198888, ENSG00000198899, ENSG00000131174, ENSG00000136997, ENSG00000198804, ENSG00000198938, ENSG00000084734, ENSG00000189043, ENSG00000159199, ENSG00000168275, ENSG00000147684, ENSG00000241837, ENSG00000106992	276	388	19277	3.24019	0.0026783
GO TERM: BP	GO:0044085~cellular component biogenesis	GO:0044085	cellular component biogenesis	79	19.8992	5.31626e-05	ENSG00000158406, ENSG00000004779, ENSG00000160606, ENSG00000171421, ENSG00000171863, ENSG00000135521, ENSG00000135763, ENSG00000198938, ENSG00000163682, ENSG00000171858, ENSG00000100902, ENSG00000005100, ENSG00000275714, ENSG00000124279, ENSG00000109475, ENSG00000123545, ENSG00000182004, ENSG00000169627, ENSG00000182841, ENSG00000102760, ENSG00000132382, ENSG00000137876, ENSG00000241343, ENSG0000…	276	3600	19277	1.53269	0.00307153
GO TERM: BP	GO:0006595~polyamine metabolic process	GO:0006595	polyamine metabolic process	5	1.25945	6.44242e-05	ENSG00000116771, ENSG00000095059, ENSG00000115758, ENSG00000116649, ENSG00000130066	276	16	19277	21.8263	0.00366744
GO TERM: BP	GO:0034613~cellular protein localization	GO:0034613	cellular protein localization	52	13.0982	6.72842e-05	ENSG00000213741, ENSG00000110700, ENSG00000171863, ENSG00000136810, ENSG00000135521, ENSG00000163682, ENSG00000171858, ENSG00000172428, ENSG00000084734, ENSG00000109475, ENSG00000217930, ENSG00000241343, ENSG00000132661, ENSG00000233927, ENSG00000197958, ENSG00000173846, ENSG00000203772, ENSG00000186198, ENSG00000166441, ENSG00000231500, ENSG00000143947, ENSG00000164587, ENSG00000122026, ENSG0000…	276	2067	19277	1.75709	0.00375079
GO TERM: BP	GO:0009057~macromolecule catabolic process	GO:0009057	macromolecule catabolic process	40	10.0756	6.78262e-05	ENSG00000213741, ENSG00000131469, ENSG00000163638, ENSG00000110700, ENSG00000134419, ENSG00000112306, ENSG00000104408, ENSG00000265681, ENSG00000197756, ENSG00000171863, ENSG00000163682, ENSG00000171858, ENSG00000198918, ENSG00000100902, ENSG00000119705, ENSG00000156482, ENSG00000109475, ENSG00000180667, ENSG00000137818, ENSG00000217930, ENSG00000077348, ENSG00000118181, ENSG00000008988, ENSG0000…	276	1428	19277	1.95642	0.00375079
GO TERM: BP	GO:0009123~nucleoside monophosphate metabolic process	GO:0009123	nucleoside monophosphate metabolic process	18	4.53401	7.51003e-05	ENSG00000264424, ENSG00000004779, ENSG00000228253, ENSG00000198712, ENSG00000169020, ENSG00000198888, ENSG00000198899, ENSG00000131174, ENSG00000136997, ENSG00000198804, ENSG00000198938, ENSG00000084734, ENSG00000189043, ENSG00000159199, ENSG00000168275, ENSG00000147684, ENSG00000241837, ENSG00000106992	276	404	19277	3.11187	0.00409455
GO TERM: BP	GO:0022618~ribonucleoprotein complex assembly	GO:0022618	ribonucleoprotein complex assembly	15	3.77834	7.75891e-05	ENSG00000172062, ENSG00000261236, ENSG00000130810, ENSG00000137876, ENSG00000104408, ENSG00000233927, ENSG00000114391, ENSG00000143977, ENSG00000185088, ENSG00000201654, ENSG00000108561, ENSG00000179041, ENSG00000164587, ENSG00000182004, ENSG00000182841	276	290	19277	3.61263	0.00411498
GO TERM: BP	GO:0022904~respiratory electron transport chain	GO:0022904	respiratory electron transport chain	10	2.51889	7.76011e-05	ENSG00000198938, ENSG00000004779, ENSG00000189043, ENSG00000168275, ENSG00000132382, ENSG00000198712, ENSG00000198888, ENSG00000131174, ENSG00000147684, ENSG00000198804	276	125	19277	5.58754	0.00411498
GO TERM: BP	GO:0070727~cellular macromolecule localization	GO:0070727	cellular macromolecule localization	52	13.0982	7.89783e-05	ENSG00000213741, ENSG00000110700, ENSG00000171863, ENSG00000136810, ENSG00000135521, ENSG00000163682, ENSG00000171858, ENSG00000172428, ENSG00000084734, ENSG00000109475, ENSG00000217930, ENSG00000241343, ENSG00000132661, ENSG00000233927, ENSG00000197958, ENSG00000173846, ENSG00000203772, ENSG00000186198, ENSG00000166441, ENSG00000231500, ENSG00000143947, ENSG00000164587, ENSG00000122026, ENSG0000…	276	2080	19277	1.74611	0.00413142
GO TERM: BP	GO:0042273~ribosomal large subunit biogenesis	GO:0042273	ribosomal large subunit biogenesis	8	2.01511	8.12817e-05	ENSG00000261236, ENSG00000130810, ENSG00000114391, ENSG00000111845, ENSG00000179041, ENSG00000048162, ENSG00000137876, ENSG00000161970	276	73	19277	7.65416	0.00419522
GO TERM: BP	GO:1901798~positive regulation of signal transduction by p53 class mediator	GO:1901798	positive regulation of signal transduction by p53 class mediator	6	1.51134	8.36865e-05	ENSG00000124802, ENSG00000207721, ENSG00000008988, ENSG00000161970, ENSG00000171863, ENSG00000136997	276	32	19277	13.0958	0.00426251
GO TERM: BP	GO:0006119~oxidative phosphorylation	GO:0006119	oxidative phosphorylation	10	2.51889	8.77481e-05	ENSG00000198938, ENSG00000004779, ENSG00000189043, ENSG00000168275, ENSG00000198712, ENSG00000198888, ENSG00000131174, ENSG00000147684, ENSG00000136997, ENSG00000198804	276	127	19277	5.49954	0.00441134
GO TERM: BP	GO:0008216~spermidine metabolic process	GO:0008216	spermidine metabolic process	4	1.00756	9.63379e-05	ENSG00000116771, ENSG00000095059, ENSG00000116649, ENSG00000130066	276	7	19277	39.911	0.00478108
GO TERM: BP	GO:0006818~hydrogen transport	GO:0006818	hydrogen transport	11	2.77078	0.000114332	ENSG00000198938, ENSG00000189043, ENSG00000159199, ENSG00000228253, ENSG00000198712, ENSG00000169020, ENSG00000198899, ENSG00000131174, ENSG00000088992, ENSG00000241837, ENSG00000198804	276	162	19277	4.74251	0.00551821
GO TERM: BP	GO:0015992~proton transport	GO:0015992	proton transport	11	2.77078	0.000114332	ENSG00000198938, ENSG00000189043, ENSG00000159199, ENSG00000228253, ENSG00000198712, ENSG00000169020, ENSG00000198899, ENSG00000131174, ENSG00000088992, ENSG00000241837, ENSG00000198804	276	162	19277	4.74251	0.00551821
GO TERM: BP	GO:0015031~protein transport	GO:0015031	protein transport	49	12.3426	0.000115468	ENSG00000213741, ENSG00000163638, ENSG00000110700, ENSG00000171863, ENSG00000136810, ENSG00000135521, ENSG00000163682, ENSG00000171858, ENSG00000084734, ENSG00000109475, ENSG00000217930, ENSG00000241343, ENSG00000132661, ENSG00000233927, ENSG00000197958, ENSG00000173846, ENSG00000203772, ENSG00000186198, ENSG00000166441, ENSG00000231500, ENSG00000284946, ENSG00000143947, ENSG00000164587, ENSG0000…	276	1946	19277	1.75867	0.00551821
GO TERM: BP	GO:0042775~mitochondrial ATP synthesis coupled electron transport	GO:0042775	mitochondrial ATP synthesis coupled electron transport	9	2.267	0.000122329	ENSG00000198938, ENSG00000004779, ENSG00000189043, ENSG00000168275, ENSG00000198712, ENSG00000198888, ENSG00000131174, ENSG00000147684, ENSG00000198804	276	104	19277	6.04421	0.00570524
GO TERM: BP	GO:0042773~ATP synthesis coupled electron transport	GO:0042773	ATP synthesis coupled electron transport	9	2.267	0.000122329	ENSG00000198938, ENSG00000004779, ENSG00000189043, ENSG00000168275, ENSG00000198712, ENSG00000198888, ENSG00000131174, ENSG00000147684, ENSG00000198804	276	104	19277	6.04421	0.00570524
GO TERM: BP	GO:0010629~negative regulation of gene expression	GO:0010629	negative regulation of gene expression	61	15.3652	0.000128245	ENSG00000158406, ENSG00000153234, ENSG00000213741, ENSG00000180573, ENSG00000110700, ENSG00000171863, ENSG00000136810, ENSG00000221493, ENSG00000163682, ENSG00000171858, ENSG00000184260, ENSG00000207547, ENSG00000275714, ENSG00000109475, ENSG00000018869, ENSG00000181218, ENSG00000141378, ENSG00000176165, ENSG00000111424, ENSG00000132382, ENSG00000241343, ENSG00000155846, ENSG00000134323, ENSG0000…	276	2630	19277	1.61996	0.00590994
GO TERM: CC	GO:0070069~cytochrome complex	GO:0070069	cytochrome complex	6	1.51134	0.000443537	ENSG00000198938, ENSG00000189043, ENSG00000168275, ENSG00000198712, ENSG00000131174, ENSG00000198804	266	42	17223	9.24973	0.00661273
GO TERM: BP	GO:0009150~purine ribonucleotide metabolic process	GO:0009150	purine ribonucleotide metabolic process	21	5.28967	0.000150149	ENSG00000264424, ENSG00000004779, ENSG00000243678, ENSG00000228253, ENSG00000198712, ENSG00000169020, ENSG00000198888, ENSG00000198899, ENSG00000131174, ENSG00000136997, ENSG00000198804, ENSG00000198938, ENSG00000084734, ENSG00000189043, ENSG00000159199, ENSG00000168275, ENSG00000147684, ENSG00000241837, ENSG00000239672, ENSG00000167799, ENSG00000106992	276	555	19277	2.64275	0.00682139
GO TERM: BP	GO:1902255~positive regulation of intrinsic apoptotic signaling pathway by p53 class mediator	GO:1902255	positive regulation of intrinsic apoptotic signaling pathway by p53 class mediator	4	1.00756	0.000152514	ENSG00000207721, ENSG00000161970, ENSG00000171863, ENSG00000136997	276	8	19277	34.9221	0.00682139
GO TERM: BP	GO:0045184~establishment of protein localization	GO:0045184	establishment of protein localization	51	12.8463	0.000153309	ENSG00000213741, ENSG00000163638, ENSG00000110700, ENSG00000171863, ENSG00000136810, ENSG00000135521, ENSG00000163682, ENSG00000171858, ENSG00000084734, ENSG00000109475, ENSG00000217930, ENSG00000241343, ENSG00000132661, ENSG00000233927, ENSG00000197958, ENSG00000173846, ENSG00000203772, ENSG00000186198, ENSG00000166441, ENSG00000231500, ENSG00000284946, ENSG00000143947, ENSG00000164587, ENSG0000…	276	2080	19277	1.71253	0.00682139
GO TERM: BP	GO:0071826~ribonucleoprotein complex subunit organization	GO:0071826	ribonucleoprotein complex subunit organization	15	3.77834	0.000156397	ENSG00000172062, ENSG00000261236, ENSG00000130810, ENSG00000137876, ENSG00000104408, ENSG00000233927, ENSG00000114391, ENSG00000143977, ENSG00000185088, ENSG00000201654, ENSG00000108561, ENSG00000179041, ENSG00000164587, ENSG00000182004, ENSG00000182841	276	310	19277	3.37956	0.00683418
GO TERM: BP	GO:0034622~cellular macromolecular complex assembly	GO:0034622	cellular macromolecular complex assembly	37	9.3199	0.000157128	ENSG00000158406, ENSG00000004779, ENSG00000276180, ENSG00000128298, ENSG00000130810, ENSG00000198888, ENSG00000104408, ENSG00000171202, ENSG00000274641, ENSG00000198938, ENSG00000197903, ENSG00000100902, ENSG00000005100, ENSG00000143977, ENSG00000275714, ENSG00000168275, ENSG00000108561, ENSG00000124279, ENSG00000179041, ENSG00000123545, ENSG00000182004, ENSG00000182841, ENSG00000187837, ENSG0000…	276	1329	19277	1.9445	0.00683418
GO TERM: CC	GO:0005751~mitochondrial respiratory chain complex IV	GO:0005751	mitochondrial respiratory chain complex IV	5	1.25945	0.000537247	ENSG00000198938, ENSG00000189043, ENSG00000198712, ENSG00000131174, ENSG00000198804	266	25	17223	12.9496	0.00777428
GO TERM: BP	GO:0007007~inner mitochondrial membrane organization	GO:0007007	inner mitochondrial membrane organization	7	1.76322	0.000190781	ENSG00000159199, ENSG00000228253, ENSG00000126953, ENSG00000169020, ENSG00000198899, ENSG00000241837, ENSG00000136997	276	59	19277	8.2866	0.00820571
GO TERM: BP	GO:0042776~mitochondrial ATP synthesis coupled proton transport	GO:0042776	mitochondrial ATP synthesis coupled proton transport	5	1.25945	0.000200276	ENSG00000159199, ENSG00000228253, ENSG00000169020, ENSG00000198899, ENSG00000241837	276	21	19277	16.6296	0.00851943
GO TERM: BP	GO:1902600~hydrogen ion transmembrane transport	GO:1902600	hydrogen ion transmembrane transport	10	2.51889	0.000205466	ENSG00000198938, ENSG00000189043, ENSG00000159199, ENSG00000228253, ENSG00000198712, ENSG00000169020, ENSG00000198899, ENSG00000131174, ENSG00000241837, ENSG00000198804	276	142	19277	4.91861	0.00864519
GO TERM: BP	GO:0006754~ATP biosynthetic process	GO:0006754	ATP biosynthetic process	7	1.76322	0.000209473	ENSG00000159199, ENSG00000228253, ENSG00000198712, ENSG00000169020, ENSG00000198899, ENSG00000241837, ENSG00000136997	276	60	19277	8.14849	0.00867752
GO TERM: BP	GO:0009168~purine ribonucleoside monophosphate biosynthetic process	GO:0009168	purine ribonucleoside monophosphate biosynthetic process	8	2.01511	0.000212959	ENSG00000159199, ENSG00000228253, ENSG00000198712, ENSG00000169020, ENSG00000198899, ENSG00000241837, ENSG00000136997, ENSG00000106992	276	85	19277	6.57357	0.00867752
GO TERM: BP	GO:0009127~purine nucleoside monophosphate biosynthetic process	GO:0009127	purine nucleoside monophosphate biosynthetic process	8	2.01511	0.000212959	ENSG00000159199, ENSG00000228253, ENSG00000198712, ENSG00000169020, ENSG00000198899, ENSG00000241837, ENSG00000136997, ENSG00000106992	276	85	19277	6.57357	0.00867752
GO TERM: BP	GO:0006163~purine nucleotide metabolic process	GO:0006163	purine nucleotide metabolic process	21	5.28967	0.000216569	ENSG00000264424, ENSG00000004779, ENSG00000243678, ENSG00000228253, ENSG00000198712, ENSG00000169020, ENSG00000198888, ENSG00000198899, ENSG00000131174, ENSG00000136997, ENSG00000198804, ENSG00000198938, ENSG00000084734, ENSG00000189043, ENSG00000159199, ENSG00000168275, ENSG00000147684, ENSG00000241837, ENSG00000239672, ENSG00000167799, ENSG00000106992	276	571	19277	2.5687	0.0087327
GO TERM: BP	GO:0009259~ribonucleotide metabolic process	GO:0009259	ribonucleotide metabolic process	21	5.28967	0.000222597	ENSG00000264424, ENSG00000004779, ENSG00000243678, ENSG00000228253, ENSG00000198712, ENSG00000169020, ENSG00000198888, ENSG00000198899, ENSG00000131174, ENSG00000136997, ENSG00000198804, ENSG00000198938, ENSG00000084734, ENSG00000189043, ENSG00000159199, ENSG00000168275, ENSG00000147684, ENSG00000241837, ENSG00000239672, ENSG00000167799, ENSG00000106992	276	573	19277	2.55974	0.00888324
GO TERM: BP	GO:0015833~peptide transport	GO:0015833	peptide transport	49	12.3426	0.000225873	ENSG00000213741, ENSG00000163638, ENSG00000110700, ENSG00000171863, ENSG00000136810, ENSG00000135521, ENSG00000163682, ENSG00000171858, ENSG00000084734, ENSG00000109475, ENSG00000217930, ENSG00000241343, ENSG00000132661, ENSG00000233927, ENSG00000197958, ENSG00000173846, ENSG00000203772, ENSG00000186198, ENSG00000166441, ENSG00000231500, ENSG00000284946, ENSG00000143947, ENSG00000164587, ENSG0000…	276	2002	19277	1.70947	0.00892199
GO TERM: BP	GO:1901796~regulation of signal transduction by p53 class mediator	GO:1901796	regulation of signal transduction by p53 class mediator	12	3.02267	0.000243413	ENSG00000155542, ENSG00000173846, ENSG00000261236, ENSG00000124802, ENSG00000207721, ENSG00000111845, ENSG00000179041, ENSG00000008988, ENSG00000161970, ENSG00000171863, ENSG00000136997, ENSG00000135763	276	212	19277	3.95345	0.00951768
GO TERM: CC	GO:0005746~mitochondrial respiratory chain	GO:0005746	mitochondrial respiratory chain	8	2.01511	0.000701157	ENSG00000198938, ENSG00000004779, ENSG00000189043, ENSG00000198712, ENSG00000198888, ENSG00000131174, ENSG00000147684, ENSG00000198804	266	96	17223	5.39568	0.00985626
GO TERM: BP	GO:0022900~electron transport chain	GO:0022900	electron transport chain	11	2.77078	0.000269762	ENSG00000198938, ENSG00000176153, ENSG00000004779, ENSG00000189043, ENSG00000168275, ENSG00000132382, ENSG00000198712, ENSG00000198888, ENSG00000131174, ENSG00000147684, ENSG00000198804	276	180	19277	4.26826	0.0104425
GO TERM: BP	GO:0051641~cellular localization	GO:0051641	cellular localization	67	16.8766	0.000300269	ENSG00000213741, ENSG00000110700, ENSG00000169020, ENSG00000171863, ENSG00000136810, ENSG00000135521, ENSG00000163682, ENSG00000171858, ENSG00000172428, ENSG00000084734, ENSG00000109475, ENSG00000182004, ENSG00000217930, ENSG00000228253, ENSG00000198899, ENSG00000241343, ENSG00000132661, ENSG00000173898, ENSG00000233927, ENSG00000197958, ENSG00000167014, ENSG00000173846, ENSG00000203772, ENSG0000…	276	3067	19277	1.52578	0.0115083
GO TERM: BP	GO:0006123~mitochondrial electron transport, cytochrome c to oxygen	GO:0006123	mitochondrial electron transport, cytochrome c to oxygen	5	1.25945	0.000343806	ENSG00000198938, ENSG00000189043, ENSG00000198712, ENSG00000131174, ENSG00000198804	276	24	19277	14.5509	0.0129236
GO TERM: BP	GO:0042886~amide transport	GO:0042886	amide transport	49	12.3426	0.000344242	ENSG00000213741, ENSG00000163638, ENSG00000110700, ENSG00000171863, ENSG00000136810, ENSG00000135521, ENSG00000163682, ENSG00000171858, ENSG00000084734, ENSG00000109475, ENSG00000217930, ENSG00000241343, ENSG00000132661, ENSG00000233927, ENSG00000197958, ENSG00000173846, ENSG00000203772, ENSG00000186198, ENSG00000166441, ENSG00000231500, ENSG00000284946, ENSG00000143947, ENSG00000164587, ENSG0000…	276	2039	19277	1.67845	0.0129236
GO TERM: BP	GO:0019693~ribose phosphate metabolic process	GO:0019693	ribose phosphate metabolic process	21	5.28967	0.00034721	ENSG00000264424, ENSG00000004779, ENSG00000243678, ENSG00000228253, ENSG00000198712, ENSG00000169020, ENSG00000198888, ENSG00000198899, ENSG00000131174, ENSG00000136997, ENSG00000198804, ENSG00000198938, ENSG00000084734, ENSG00000189043, ENSG00000159199, ENSG00000168275, ENSG00000147684, ENSG00000241837, ENSG00000239672, ENSG00000167799, ENSG00000106992	276	592	19277	2.47758	0.0129236
GO TERM: CC	GO:0005654~nucleoplasm	GO:0005654	nucleoplasm	88	22.1662	0.00098814	ENSG00000158406, ENSG00000153234, ENSG00000213741, ENSG00000004779, ENSG00000180573, ENSG00000110700, ENSG00000171421, ENSG00000171863, ENSG00000136810, ENSG00000135521, ENSG00000171858, ENSG00000172428, ENSG00000100902, ENSG00000084734, ENSG00000005100, ENSG00000275714, ENSG00000124279, ENSG00000182004, ENSG00000163884, ENSG00000102760, ENSG00000105982, ENSG00000176165, ENSG00000111424, ENSG0000…	266	4187	17223	1.36084	0.0135046
GO TERM: CC	GO:0032993~protein-DNA complex	GO:0032993	protein-DNA complex	12	3.02267	0.00103335	ENSG00000197903, ENSG00000274641, ENSG00000158406, ENSG00000184260, ENSG00000276180, ENSG00000180573, ENSG00000275714, ENSG00000277075, ENSG00000164362, ENSG00000181218, ENSG00000187837, ENSG00000196747	266	234	17223	3.32042	0.0137408
GO TERM: CC	GO:0033177~proton-transporting two-sector ATPase complex, proton-transporting domain	GO:0033177	proton-transporting two-sector ATPase complex, proton-transporting domain	5	1.25945	0.00109576	ENSG00000159199, ENSG00000228253, ENSG00000169020, ENSG00000198899, ENSG00000241837	266	30	17223	10.7914	0.0141872
GO TERM: CC	GO:0000276~mitochondrial proton-transporting ATP synthase complex, coupling factor F(o)	GO:0000276	mitochondrial proton-transporting ATP synthase complex, coupling factor F(o)	4	1.00756	0.00142888	ENSG00000159199, ENSG00000228253, ENSG00000169020, ENSG00000241837	266	15	17223	17.2662	0.017897
GO TERM: CC	GO:0030684~preribosome	GO:0030684	preribosome	7	1.76322	0.00145504	ENSG00000101361, ENSG00000261236, ENSG00000130810, ENSG00000179041, ENSG00000171863, ENSG00000182841, ENSG00000135521	266	80	17223	5.66546	0.017897
GO TERM: BP	GO:0009156~ribonucleoside monophosphate biosynthetic process	GO:0009156	ribonucleoside monophosphate biosynthetic process	8	2.01511	0.000542468	ENSG00000159199, ENSG00000228253, ENSG00000198712, ENSG00000169020, ENSG00000198899, ENSG00000241837, ENSG00000136997, ENSG00000106992	276	99	19277	5.64398	0.0196797
GO TERM: BP	GO:0072521~purine-containing compound metabolic process	GO:0072521	purine-containing compound metabolic process	21	5.28967	0.000548913	ENSG00000264424, ENSG00000004779, ENSG00000243678, ENSG00000228253, ENSG00000198712, ENSG00000169020, ENSG00000198888, ENSG00000198899, ENSG00000131174, ENSG00000136997, ENSG00000198804, ENSG00000198938, ENSG00000084734, ENSG00000189043, ENSG00000159199, ENSG00000168275, ENSG00000147684, ENSG00000241837, ENSG00000239672, ENSG00000167799, ENSG00000106992	276	614	19277	2.38881	0.0196797
GO TERM: BP	GO:0015986~ATP synthesis coupled proton transport	GO:0015986	ATP synthesis coupled proton transport	5	1.25945	0.00054906	ENSG00000159199, ENSG00000228253, ENSG00000169020, ENSG00000198899, ENSG00000241837	276	27	19277	12.9341	0.0196797
GO TERM: BP	GO:0015985~energy coupled proton transport, down electrochemical gradient	GO:0015985	energy coupled proton transport, down electrochemical gradient	5	1.25945	0.00054906	ENSG00000159199, ENSG00000228253, ENSG00000169020, ENSG00000198899, ENSG00000241837	276	27	19277	12.9341	0.0196797
GO TERM: BP	GO:0007005~mitochondrion organization	GO:0007005	mitochondrion organization	21	5.28967	0.000559424	ENSG00000004779, ENSG00000217930, ENSG00000196860, ENSG00000228253, ENSG00000169020, ENSG00000198888, ENSG00000198899, ENSG00000242114, ENSG00000136997, ENSG00000171202, ENSG00000175768, ENSG00000188763, ENSG00000159199, ENSG00000119705, ENSG00000164362, ENSG00000124279, ENSG00000126953, ENSG00000147684, ENSG00000123545, ENSG00000241837, ENSG00000162851	276	615	19277	2.38492	0.0198673
GO TERM: CC	GO:0016469~proton-transporting two-sector ATPase complex	GO:0016469	proton-transporting two-sector ATPase complex	6	1.51134	0.00167244	ENSG00000173915, ENSG00000159199, ENSG00000228253, ENSG00000169020, ENSG00000198899, ENSG00000241837	266	56	17223	6.9373	0.0200693
GO TERM: CC	GO:1903561~extracellular vesicle	GO:1903561	extracellular vesicle	54	13.602	0.00174014	ENSG00000158406, ENSG00000213741, ENSG00000180573, ENSG00000243678, ENSG00000110700, ENSG00000136810, ENSG00000221493, ENSG00000184260, ENSG00000100902, ENSG00000275714, ENSG00000109475, ENSG00000090402, ENSG00000181218, ENSG00000106003, ENSG00000099974, ENSG00000233927, ENSG00000197958, ENSG00000186395, ENSG00000169710, ENSG00000102879, ENSG00000231500, ENSG00000143947, ENSG00000164587, ENSG0000…	266	2313	17223	1.51163	0.0202933
GO TERM: CC	GO:0043230~extracellular organelle	GO:0043230	extracellular organelle	54	13.602	0.0017736	ENSG00000158406, ENSG00000213741, ENSG00000180573, ENSG00000243678, ENSG00000110700, ENSG00000136810, ENSG00000221493, ENSG00000184260, ENSG00000100902, ENSG00000275714, ENSG00000109475, ENSG00000090402, ENSG00000181218, ENSG00000106003, ENSG00000099974, ENSG00000233927, ENSG00000197958, ENSG00000186395, ENSG00000169710, ENSG00000102879, ENSG00000231500, ENSG00000143947, ENSG00000164587, ENSG0000…	266	2315	17223	1.51032	0.0202933
GO TERM: CC	GO:0070062~extracellular exosome	GO:0070062	extracellular exosome	52	13.0982	0.00198457	ENSG00000158406, ENSG00000213741, ENSG00000180573, ENSG00000243678, ENSG00000110700, ENSG00000136810, ENSG00000184260, ENSG00000100902, ENSG00000275714, ENSG00000109475, ENSG00000090402, ENSG00000181218, ENSG00000099974, ENSG00000233927, ENSG00000197958, ENSG00000186395, ENSG00000169710, ENSG00000102879, ENSG00000231500, ENSG00000143947, ENSG00000164587, ENSG00000142534, ENSG00000106992, ENSG0000…	266	2217	17223	1.51867	0.0221912
GO TERM: BP	GO:0000027~ribosomal large subunit assembly	GO:0000027	ribosomal large subunit assembly	5	1.25945	0.000633438	ENSG00000261236, ENSG00000130810, ENSG00000114391, ENSG00000179041, ENSG00000137876	276	28	19277	12.4722	0.0222912
GO TERM: BP	GO:0019438~aromatic compound biosynthetic process	GO:0019438	aromatic compound biosynthetic process	90	22.67	0.00069704	ENSG00000158406, ENSG00000153234, ENSG00000213741, ENSG00000180573, ENSG00000243678, ENSG00000110700, ENSG00000169020, ENSG00000179988, ENSG00000171863, ENSG00000136810, ENSG00000163682, ENSG00000171858, ENSG00000184260, ENSG00000100902, ENSG00000157193, ENSG00000005100, ENSG00000169740, ENSG00000275714, ENSG00000109475, ENSG00000182004, ENSG00000018869, ENSG00000181218, ENSG00000163884, ENSG0000…	276	4584	19277	1.37129	0.0243085
GO TERM: CC	GO:0005925~focal adhesion	GO:0005925	focal adhesion	16	4.03023	0.00232623	ENSG00000137818, ENSG00000213741, ENSG00000131469, ENSG00000110700, ENSG00000198910, ENSG00000197756, ENSG00000171863, ENSG00000197958, ENSG00000145425, ENSG00000163682, ENSG00000231500, ENSG00000156482, ENSG00000187678, ENSG00000164587, ENSG00000182774, ENSG00000142534	266	422	17223	2.45491	0.0254335
GO TERM: BP	GO:0006596~polyamine biosynthetic process	GO:0006596	polyamine biosynthetic process	4	1.00756	0.000738739	ENSG00000116771, ENSG00000115758, ENSG00000116649, ENSG00000130066	276	13	19277	21.4905	0.0255327
GO TERM: BP	GO:0006342~chromatin silencing	GO:0006342	chromatin silencing	9	2.267	0.000756122	ENSG00000158406, ENSG00000184260, ENSG00000276180, ENSG00000180573, ENSG00000275714, ENSG00000277075, ENSG00000181218, ENSG00000187837, ENSG00000196747	276	136	19277	4.62204	0.0259022
GO TERM: MF	GO:0015078~hydrogen ion transmembrane transporter activity	GO:0015078	hydrogen ion transmembrane transporter activity	9	2.267	0.000231653	ENSG00000198938, ENSG00000159199, ENSG00000228253, ENSG00000198712, ENSG00000169020, ENSG00000198899, ENSG00000131174, ENSG00000241837, ENSG00000198804	234	117	16739	5.50263	0.0272578
GO TERM: CC	GO:0005924~cell-substrate adherens junction	GO:0005924	cell-substrate adherens junction	16	4.03023	0.00258691	ENSG00000137818, ENSG00000213741, ENSG00000131469, ENSG00000110700, ENSG00000198910, ENSG00000197756, ENSG00000171863, ENSG00000197958, ENSG00000145425, ENSG00000163682, ENSG00000231500, ENSG00000156482, ENSG00000187678, ENSG00000164587, ENSG00000182774, ENSG00000142534	266	426	17223	2.43185	0.0276687
GO TERM: CC	GO:0005829~cytosol	GO:0005829	cytosol	107	26.9521	0.00264788	ENSG00000176153, ENSG00000110700, ENSG00000116649, ENSG00000136810, ENSG00000100902, ENSG00000084734, ENSG00000005100, ENSG00000169627, ENSG00000102760, ENSG00000105982, ENSG00000095059, ENSG00000115946, ENSG00000137876, ENSG00000241343, ENSG00000170222, ENSG00000155846, ENSG00000060138, ENSG00000188130, ENSG00000274276, ENSG00000102879, ENSG00000164109, ENSG00000164587, ENSG00000122026, ENSG0000…	266	5471	17223	1.26632	0.0277183
GO TERM: BP	GO:0009124~nucleoside monophosphate biosynthetic process	GO:0009124	nucleoside monophosphate biosynthetic process	8	2.01511	0.000862925	ENSG00000159199, ENSG00000228253, ENSG00000198712, ENSG00000169020, ENSG00000198899, ENSG00000241837, ENSG00000136997, ENSG00000106992	276	107	19277	5.222	0.0293016
GO TERM: CC	GO:0030055~cell-substrate junction	GO:0030055	cell-substrate junction	16	4.03023	0.00288564	ENSG00000137818, ENSG00000213741, ENSG00000131469, ENSG00000110700, ENSG00000198910, ENSG00000197756, ENSG00000171863, ENSG00000197958, ENSG00000145425, ENSG00000163682, ENSG00000231500, ENSG00000156482, ENSG00000187678, ENSG00000164587, ENSG00000182774, ENSG00000142534	266	431	17223	2.40364	0.0295778
GO TERM: BP	GO:0071705~nitrogen compound transport	GO:0071705	nitrogen compound transport	53	13.3501	0.000879451	ENSG00000213741, ENSG00000163638, ENSG00000110700, ENSG00000171863, ENSG00000136810, ENSG00000135521, ENSG00000163682, ENSG00000171858, ENSG00000084734, ENSG00000109475, ENSG00000217930, ENSG00000241343, ENSG00000132661, ENSG00000233927, ENSG00000197958, ENSG00000173846, ENSG00000203772, ENSG00000186198, ENSG00000166441, ENSG00000231500, ENSG00000284946, ENSG00000143947, ENSG00000164587, ENSG0000…	276	2358	19277	1.56987	0.0296031
GO TERM: BP	GO:0034654~nucleobase-containing compound biosynthetic process	GO:0034654	nucleobase-containing compound biosynthetic process	88	22.1662	0.000929267	ENSG00000158406, ENSG00000153234, ENSG00000213741, ENSG00000180573, ENSG00000243678, ENSG00000110700, ENSG00000169020, ENSG00000179988, ENSG00000171863, ENSG00000136810, ENSG00000163682, ENSG00000171858, ENSG00000184260, ENSG00000100902, ENSG00000157193, ENSG00000005100, ENSG00000169740, ENSG00000275714, ENSG00000109475, ENSG00000182004, ENSG00000018869, ENSG00000181218, ENSG00000163884, ENSG0000…	276	4497	19277	1.36675	0.0310103
GO TERM: BP	GO:0006414~translational elongation	GO:0006414	translational elongation	9	2.267	0.000956936	ENSG00000204316, ENSG00000137818, ENSG00000163319, ENSG00000198015, ENSG00000106591, ENSG00000156482, ENSG00000171421, ENSG00000179988, ENSG00000136522	276	141	19277	4.45814	0.0316607
GO TERM: BP	GO:1990542~mitochondrial transmembrane transport	GO:1990542	mitochondrial transmembrane transport	8	2.01511	0.00101575	ENSG00000217930, ENSG00000159199, ENSG00000196860, ENSG00000228253, ENSG00000126953, ENSG00000169020, ENSG00000198899, ENSG00000241837	276	110	19277	5.07958	0.0333186
GO TERM: BP	GO:0018130~heterocycle biosynthetic process	GO:0018130	heterocycle biosynthetic process	89	22.4181	0.00102426	ENSG00000158406, ENSG00000153234, ENSG00000213741, ENSG00000180573, ENSG00000243678, ENSG00000110700, ENSG00000169020, ENSG00000179988, ENSG00000171863, ENSG00000136810, ENSG00000163682, ENSG00000171858, ENSG00000184260, ENSG00000100902, ENSG00000157193, ENSG00000005100, ENSG00000169740, ENSG00000275714, ENSG00000109475, ENSG00000182004, ENSG00000018869, ENSG00000181218, ENSG00000163884, ENSG0000…	276	4574	19277	1.35901	0.0333186
GO TERM: CC	GO:0098556~cytoplasmic side of rough endoplasmic reticulum membrane	GO:0098556	cytoplasmic side of rough endoplasmic reticulum membrane	3	0.755668	0.00339629	ENSG00000233927, ENSG00000213741, ENSG00000131469	266	6	17223	32.3741	0.0341015
GO TERM: BP	GO:0072331~signal transduction by p53 class mediator	GO:0072331	signal transduction by p53 class mediator	10	2.51889	0.00114939	ENSG00000173846, ENSG00000185088, ENSG00000124802, ENSG00000207721, ENSG00000008988, ENSG00000132382, ENSG00000161970, ENSG00000171863, ENSG00000136997, ENSG00000102760	276	180	19277	3.88023	0.036511
GO TERM: BP	GO:0000478~endonucleolytic cleavage involved in rRNA processing	GO:0000478	endonucleolytic cleavage involved in rRNA processing	4	1.00756	0.0011507	ENSG00000171858, ENSG00000261236, ENSG00000179041, ENSG00000124787	276	15	19277	18.6251	0.036511
GO TERM: BP	GO:0000479~endonucleolytic cleavage of tricistronic rRNA transcript (SSU-rRNA, 5.8S rRNA, LSU-rRNA)	GO:0000479	endonucleolytic cleavage of tricistronic rRNA transcript (SSU-rRNA, 5.8S rRNA, LSU-rRNA)	4	1.00756	0.0011507	ENSG00000171858, ENSG00000261236, ENSG00000179041, ENSG00000124787	276	15	19277	18.6251	0.036511
GO TERM: BP	GO:0009117~nucleotide metabolic process	GO:0009117	nucleotide metabolic process	22	5.54156	0.00130626	ENSG00000264424, ENSG00000004779, ENSG00000243678, ENSG00000228253, ENSG00000198712, ENSG00000169020, ENSG00000198888, ENSG00000198899, ENSG00000131174, ENSG00000136997, ENSG00000198804, ENSG00000198938, ENSG00000084734, ENSG00000189043, ENSG00000159199, ENSG00000168275, ENSG00000147684, ENSG00000241837, ENSG00000239672, ENSG00000181019, ENSG00000167799, ENSG00000106992	276	708	19277	2.1703	0.0411101
GO TERM: BP	GO:0045814~negative regulation of gene expression, epigenetic	GO:0045814	negative regulation of gene expression, epigenetic	9	2.267	0.00148609	ENSG00000158406, ENSG00000184260, ENSG00000276180, ENSG00000180573, ENSG00000275714, ENSG00000277075, ENSG00000181218, ENSG00000187837, ENSG00000196747	276	151	19277	4.1629	0.0463895
GO TERM: BP	GO:0042407~cristae formation	GO:0042407	cristae formation	5	1.25945	0.00149798	ENSG00000159199, ENSG00000228253, ENSG00000169020, ENSG00000198899, ENSG00000241837	276	35	19277	9.97774	0.0463895
GO TERM: BP	GO:0055086~nucleobase-containing small molecule metabolic process	GO:0055086	nucleobase-containing small molecule metabolic process	23	5.79345	0.00151959	ENSG00000264424, ENSG00000004779, ENSG00000243678, ENSG00000228253, ENSG00000198712, ENSG00000169020, ENSG00000198888, ENSG00000170222, ENSG00000198899, ENSG00000131174, ENSG00000136997, ENSG00000198804, ENSG00000198938, ENSG00000084734, ENSG00000189043, ENSG00000159199, ENSG00000168275, ENSG00000147684, ENSG00000241837, ENSG00000239672, ENSG00000181019, ENSG00000167799, ENSG00000106992	276	765	19277	2.09989	0.0466851
GO TERM: MF	GO:0048027~mRNA 5'-UTR binding	GO:0048027	mRNA 5'-UTR binding	5	1.25945	0.000499181	ENSG00000145425, ENSG00000110700, ENSG00000161970, ENSG00000164587, ENSG00000171863	234	27	16739	13.2471	0.0467116
GO TERM: MF	GO:0003954~NADH dehydrogenase activity	GO:0003954	NADH dehydrogenase activity	6	1.51134	0.000579578	ENSG00000189043, ENSG00000120658, ENSG00000198888, ENSG00000147684, ENSG00000198804, ENSG00000181019	234	49	16739	8.75929	0.0467116
GO TERM: MF	GO:1901363~heterocyclic compound binding	GO:1901363	heterocyclic compound binding	115	28.9673	0.000595474	ENSG00000110700, ENSG00000197774, ENSG00000136810, ENSG00000100902, ENSG00000005100, ENSG00000207547, ENSG00000169740, ENSG00000124279, ENSG00000163884, ENSG00000181218, ENSG00000132622, ENSG00000176165, ENSG00000115946, ENSG00000137876, ENSG00000241343, ENSG00000155846, ENSG00000060138, ENSG00000188130, ENSG00000274276, ENSG00000173846, ENSG00000102879, ENSG00000164587, ENSG00000122026, ENSG0000…	234	6418	16739	1.28177	0.0467116
GO TERM: BP	GO:0006753~nucleoside phosphate metabolic process	GO:0006753	nucleoside phosphate metabolic process	22	5.54156	0.00153799	ENSG00000264424, ENSG00000004779, ENSG00000243678, ENSG00000228253, ENSG00000198712, ENSG00000169020, ENSG00000198888, ENSG00000198899, ENSG00000131174, ENSG00000136997, ENSG00000198804, ENSG00000198938, ENSG00000084734, ENSG00000189043, ENSG00000159199, ENSG00000168275, ENSG00000147684, ENSG00000241837, ENSG00000239672, ENSG00000181019, ENSG00000167799, ENSG00000106992	276	718	19277	2.14007	0.0468784
GO TERM: MF	GO:0046982~protein heterodimerization activity	GO:0046982	protein heterodimerization activity	15	3.77834	0.000706479	ENSG00000153234, ENSG00000158406, ENSG00000276180, ENSG00000180573, ENSG00000277075, ENSG00000196747, ENSG00000197903, ENSG00000274641, ENSG00000186395, ENSG00000166016, ENSG00000184260, ENSG00000188763, ENSG00000275714, ENSG00000186198, ENSG00000181218	234	370	16739	2.90003	0.0498774
GO TERM: MF	GO:0097159~organic cyclic compound binding	GO:0097159	organic cyclic compound binding	115	28.9673	0.00105382	ENSG00000110700, ENSG00000197774, ENSG00000136810, ENSG00000100902, ENSG00000005100, ENSG00000207547, ENSG00000169740, ENSG00000124279, ENSG00000163884, ENSG00000181218, ENSG00000132622, ENSG00000176165, ENSG00000115946, ENSG00000137876, ENSG00000241343, ENSG00000155846, ENSG00000060138, ENSG00000188130, ENSG00000274276, ENSG00000173846, ENSG00000102879, ENSG00000164587, ENSG00000122026, ENSG0000…	234	6505	16739	1.26463	0.0676363
GO TERM: BP	GO:0045333~cellular respiration	GO:0045333	cellular respiration	10	2.51889	0.00237019	ENSG00000198938, ENSG00000004779, ENSG00000189043, ENSG00000168275, ENSG00000132382, ENSG00000198712, ENSG00000198888, ENSG00000131174, ENSG00000147684, ENSG00000198804	276	200	19277	3.49221	0.0716799
GO TERM: BP	GO:0043933~macromolecular complex subunit organization	GO:0043933	macromolecular complex subunit organization	51	12.8463	0.00246574	ENSG00000158406, ENSG00000004779, ENSG00000163319, ENSG00000171421, ENSG00000198938, ENSG00000204316, ENSG00000100902, ENSG00000005100, ENSG00000275714, ENSG00000124279, ENSG00000123545, ENSG00000182004, ENSG00000181218, ENSG00000182841, ENSG00000198015, ENSG00000137876, ENSG00000173898, ENSG00000233927, ENSG00000186395, ENSG00000102879, ENSG00000143947, ENSG00000106591, ENSG00000142856, ENSG0000…	276	2353	19277	1.51384	0.0739913
GO TERM: BP	GO:0034250~positive regulation of cellular amide metabolic process	GO:0034250	positive regulation of cellular amide metabolic process	10	2.51889	0.00253439	ENSG00000060138, ENSG00000173846, ENSG00000185088, ENSG00000164362, ENSG00000124279, ENSG00000108561, ENSG00000156482, ENSG00000161970, ENSG00000104408, ENSG00000136997	276	202	19277	3.45763	0.0750554
GO TERM: BP	GO:0032543~mitochondrial translation	GO:0032543	mitochondrial translation	8	2.01511	0.00253998	ENSG00000204316, ENSG00000163319, ENSG00000198015, ENSG00000124279, ENSG00000108561, ENSG00000106591, ENSG00000171421, ENSG00000136522	276	129	19277	4.33142	0.0750554
GO TERM: BP	GO:0032774~RNA biosynthetic process	GO:0032774	RNA biosynthetic process	79	19.8992	0.00258297	ENSG00000158406, ENSG00000153234, ENSG00000213741, ENSG00000180573, ENSG00000243678, ENSG00000110700, ENSG00000179988, ENSG00000171863, ENSG00000136810, ENSG00000163682, ENSG00000171858, ENSG00000184260, ENSG00000100902, ENSG00000157193, ENSG00000005100, ENSG00000169740, ENSG00000275714, ENSG00000109475, ENSG00000182004, ENSG00000018869, ENSG00000181218, ENSG00000163884, ENSG00000102760, ENSG0000…	276	4074	19277	1.35437	0.0757475
GO TERM: CC	GO:0005759~mitochondrial matrix	GO:0005759	mitochondrial matrix	16	4.03023	0.00817969	ENSG00000004779, ENSG00000163319, ENSG00000185818, ENSG00000217930, ENSG00000247626, ENSG00000198015, ENSG00000171421, ENSG00000136522, ENSG00000204316, ENSG00000036473, ENSG00000164362, ENSG00000124279, ENSG00000108561, ENSG00000161653, ENSG00000106591, ENSG00000162851	266	484	17223	2.14043	0.0804882
GO TERM: BP	GO:0009152~purine ribonucleotide biosynthetic process	GO:0009152	purine ribonucleotide biosynthetic process	10	2.51889	0.0029837	ENSG00000243678, ENSG00000159199, ENSG00000228253, ENSG00000198712, ENSG00000169020, ENSG00000198899, ENSG00000241837, ENSG00000136997, ENSG00000239672, ENSG00000106992	276	207	19277	3.37412	0.0867047
GO TERM: BP	GO:0045727~positive regulation of translation	GO:0045727	positive regulation of translation	9	2.267	0.0030014	ENSG00000060138, ENSG00000185088, ENSG00000164362, ENSG00000124279, ENSG00000108561, ENSG00000156482, ENSG00000161970, ENSG00000104408, ENSG00000136997	276	169	19277	3.71951	0.0867047
GO TERM: BP	GO:0000028~ribosomal small subunit assembly	GO:0000028	ribosomal small subunit assembly	4	1.00756	0.00315755	ENSG00000233927, ENSG00000185088, ENSG00000164587, ENSG00000182841	276	21	19277	13.3037	0.0905398
GO TERM: CC	GO:0030867~rough endoplasmic reticulum membrane	GO:0030867	rough endoplasmic reticulum membrane	4	1.00756	0.0097935	ENSG00000233927, ENSG00000213741, ENSG00000131469, ENSG00000185818	266	29	17223	8.93078	0.0938484
GO TERM: CC	GO:0005762~mitochondrial large ribosomal subunit	GO:0005762	mitochondrial large ribosomal subunit	5	1.25945	0.0101097	ENSG00000204316, ENSG00000198015, ENSG00000106591, ENSG00000171421, ENSG00000136522	266	55	17223	5.88619	0.0938484
GO TERM: CC	GO:0000315~organellar large ribosomal subunit	GO:0000315	organellar large ribosomal subunit	5	1.25945	0.0101097	ENSG00000204316, ENSG00000198015, ENSG00000106591, ENSG00000171421, ENSG00000136522	266	55	17223	5.88619	0.0938484
GO TERM: CC	GO:0000313~organellar ribosome	GO:0000313	organellar ribosome	6	1.51134	0.0105202	ENSG00000204316, ENSG00000163319, ENSG00000198015, ENSG00000106591, ENSG00000171421, ENSG00000136522	266	86	17223	4.51731	0.0941083
GO TERM: CC	GO:0005761~mitochondrial ribosome	GO:0005761	mitochondrial ribosome	6	1.51134	0.0105202	ENSG00000204316, ENSG00000163319, ENSG00000198015, ENSG00000106591, ENSG00000171421, ENSG00000136522	266	86	17223	4.51731	0.0941083
GO TERM: CC	GO:0005791~rough endoplasmic reticulum	GO:0005791	rough endoplasmic reticulum	6	1.51134	0.0115467	ENSG00000233927, ENSG00000213741, ENSG00000171858, ENSG00000131469, ENSG00000185818, ENSG00000136997	266	88	17223	4.41464	0.101446
GO TERM: BP	GO:1990000~amyloid fibril formation	GO:1990000	amyloid fibril formation	7	1.76322	0.00359785	ENSG00000090382, ENSG00000158406, ENSG00000276180, ENSG00000275714, ENSG00000143947, ENSG00000205572, ENSG00000101132	276	103	19277	4.74669	0.102406
GO TERM: MF	GO:0046933~proton-transporting ATP synthase activity, rotational mechanism	GO:0046933	proton-transporting ATP synthase activity, rotational mechanism	4	1.00756	0.00186146	ENSG00000228253, ENSG00000169020, ENSG00000198899, ENSG00000241837	234	18	16739	15.8965	0.109516
GO TERM: BP	GO:1990748~cellular detoxification	GO:1990748	cellular detoxification	7	1.76322	0.00395544	ENSG00000163220, ENSG00000176153, ENSG00000204444, ENSG00000257017, ENSG00000115657, ENSG00000136810, ENSG00000181019	276	105	19277	4.65628	0.111763
GO TERM: BP	GO:0006164~purine nucleotide biosynthetic process	GO:0006164	purine nucleotide biosynthetic process	10	2.51889	0.00407141	ENSG00000243678, ENSG00000159199, ENSG00000228253, ENSG00000198712, ENSG00000169020, ENSG00000198899, ENSG00000241837, ENSG00000136997, ENSG00000239672, ENSG00000106992	276	217	19277	3.21863	0.114206
GO TERM: BP	GO:0042401~cellular biogenic amine biosynthetic process	GO:0042401	cellular biogenic amine biosynthetic process	4	1.00756	0.00411712	ENSG00000116771, ENSG00000115758, ENSG00000116649, ENSG00000130066	276	23	19277	12.1468	0.114657
GO TERM: BP	GO:0044106~cellular amine metabolic process	GO:0044106	cellular amine metabolic process	8	2.01511	0.00416035	ENSG00000153234, ENSG00000116771, ENSG00000095059, ENSG00000100902, ENSG00000115758, ENSG00000116649, ENSG00000130066, ENSG00000181019	276	141	19277	3.96279	0.115034
GO TERM: BP	GO:0009260~ribonucleotide biosynthetic process	GO:0009260	ribonucleotide biosynthetic process	10	2.51889	0.00458376	ENSG00000243678, ENSG00000159199, ENSG00000228253, ENSG00000198712, ENSG00000169020, ENSG00000198899, ENSG00000241837, ENSG00000136997, ENSG00000239672, ENSG00000106992	276	221	19277	3.16037	0.125842
GO TERM: BP	GO:0009309~amine biosynthetic process	GO:0009309	amine biosynthetic process	4	1.00756	0.00465616	ENSG00000116771, ENSG00000115758, ENSG00000116649, ENSG00000130066	276	24	19277	11.6407	0.126042
GO TERM: BP	GO:0000466~maturation of 5.8S rRNA from tricistronic rRNA transcript (SSU-rRNA, 5.8S rRNA, LSU-rRNA)	GO:0000466	maturation of 5.8S rRNA from tricistronic rRNA transcript (SSU-rRNA, 5.8S rRNA, LSU-rRNA)	4	1.00756	0.00465616	ENSG00000171858, ENSG00000261236, ENSG00000179041, ENSG00000124787	276	24	19277	11.6407	0.126042
GO TERM: CC	GO:0035580~specific granule lumen	GO:0035580	specific granule lumen	5	1.25945	0.0152178	ENSG00000090382, ENSG00000229314, ENSG00000124107, ENSG00000257017, ENSG00000228278	266	62	17223	5.22162	0.131353
GO TERM: BP	GO:0065003~macromolecular complex assembly	GO:0065003	macromolecular complex assembly	43	10.8312	0.00500273	ENSG00000158406, ENSG00000004779, ENSG00000276180, ENSG00000128298, ENSG00000130810, ENSG00000198888, ENSG00000104408, ENSG00000136997, ENSG00000171202, ENSG00000274641, ENSG00000198938, ENSG00000197903, ENSG00000100902, ENSG00000005100, ENSG00000143977, ENSG00000275714, ENSG00000168275, ENSG00000108561, ENSG00000124279, ENSG00000179041, ENSG00000123545, ENSG00000182004, ENSG00000182841, ENSG0000…	276	1963	19277	1.52995	0.134483
GO TERM: BP	GO:0009445~putrescine metabolic process	GO:0009445	putrescine metabolic process	3	0.755668	0.00536458	ENSG00000116771, ENSG00000115758, ENSG00000130066	276	8	19277	26.1916	0.143216
GO TERM: BP	GO:0030490~maturation of SSU-rRNA	GO:0030490	maturation of SSU-rRNA	5	1.25945	0.00557682	ENSG00000233927, ENSG00000171858, ENSG00000179041, ENSG00000124787, ENSG00000164587	276	50	19277	6.98442	0.146892
GO TERM: BP	GO:0009308~amine metabolic process	GO:0009308	amine metabolic process	8	2.01511	0.00561081	ENSG00000153234, ENSG00000116771, ENSG00000095059, ENSG00000100902, ENSG00000115758, ENSG00000116649, ENSG00000130066, ENSG00000181019	276	149	19277	3.75002	0.146892
GO TERM: BP	GO:0046390~ribose phosphate biosynthetic process	GO:0046390	ribose phosphate biosynthetic process	10	2.51889	0.00561611	ENSG00000243678, ENSG00000159199, ENSG00000228253, ENSG00000198712, ENSG00000169020, ENSG00000198899, ENSG00000241837, ENSG00000136997, ENSG00000239672, ENSG00000106992	276	228	19277	3.06334	0.146892
GO TERM: BP	GO:0072522~purine-containing compound biosynthetic process	GO:0072522	purine-containing compound biosynthetic process	10	2.51889	0.00591967	ENSG00000243678, ENSG00000159199, ENSG00000228253, ENSG00000198712, ENSG00000169020, ENSG00000198899, ENSG00000241837, ENSG00000136997, ENSG00000239672, ENSG00000106992	276	230	19277	3.0367	0.153792
GO TERM: BP	GO:0000469~cleavage involved in rRNA processing	GO:0000469	cleavage involved in rRNA processing	4	1.00756	0.00652066	ENSG00000171858, ENSG00000261236, ENSG00000179041, ENSG00000124787	276	27	19277	10.3473	0.168277
GO TERM: BP	GO:0072332~intrinsic apoptotic signaling pathway by p53 class mediator	GO:0072332	intrinsic apoptotic signaling pathway by p53 class mediator	6	1.51134	0.00669542	ENSG00000185088, ENSG00000207721, ENSG00000132382, ENSG00000161970, ENSG00000171863, ENSG00000136997	276	83	19277	5.04898	0.171642
GO TERM: BP	GO:0000447~endonucleolytic cleavage in ITS1 to separate SSU-rRNA from 5.8S rRNA and LSU-rRNA from tricistronic rRNA transcript (SSU-rRNA, 5.8S rRNA, LSU-rRNA)	GO:0000447	endonucleolytic cleavage in ITS1 to separate SSU-rRNA from 5.8S rRNA and LSU-rRNA from tricistronic rRNA transcript (SSU-rRNA, 5.8S rRNA, LSU-rRNA)	3	0.755668	0.00683264	ENSG00000171858, ENSG00000179041, ENSG00000124787	276	9	19277	23.2814	0.174008
GO TERM: BP	GO:0007006~mitochondrial membrane organization	GO:0007006	mitochondrial membrane organization	8	2.01511	0.00741058	ENSG00000188763, ENSG00000159199, ENSG00000228253, ENSG00000126953, ENSG00000169020, ENSG00000198899, ENSG00000241837, ENSG00000136997	276	157	19277	3.55894	0.187492
GO TERM: BP	GO:0098754~detoxification	GO:0098754	detoxification	7	1.76322	0.00783044	ENSG00000163220, ENSG00000176153, ENSG00000204444, ENSG00000257017, ENSG00000115657, ENSG00000136810, ENSG00000181019	276	121	19277	4.04057	0.196829
GO TERM: BP	GO:0010942~positive regulation of cell death	GO:0010942	positive regulation of cell death	21	5.28967	0.00799312	ENSG00000111424, ENSG00000132382, ENSG00000198712, ENSG00000171863, ENSG00000136997, ENSG00000163220, ENSG00000188763, ENSG00000185088, ENSG00000138172, ENSG00000124802, ENSG00000207721, ENSG00000143947, ENSG00000108561, ENSG00000257017, ENSG00000161970, ENSG00000162998, ENSG00000142856, ENSG00000181649, ENSG00000181019, ENSG00000141378, ENSG00000102760	276	775	19277	1.89255	0.199622
GO TERM: BP	GO:0051091~positive regulation of sequence-specific DNA binding transcription factor activity	GO:0051091	positive regulation of sequence-specific DNA binding transcription factor activity	11	2.77078	0.00805711	ENSG00000189056, ENSG00000163220, ENSG00000100902, ENSG00000157193, ENSG00000005100, ENSG00000185483, ENSG00000143947, ENSG00000155846, ENSG00000133169, ENSG00000102760, ENSG00000176170	276	285	19277	2.69574	0.19993
GO TERM: BP	GO:0034645~cellular macromolecule biosynthetic process	GO:0034645	cellular macromolecule biosynthetic process	103	25.9446	0.00820608	ENSG00000110700, ENSG00000197774, ENSG00000171421, ENSG00000136810, ENSG00000204316, ENSG00000100902, ENSG00000157193, ENSG00000005100, ENSG00000207547, ENSG00000169740, ENSG00000124279, ENSG00000163884, ENSG00000181218, ENSG00000102760, ENSG00000176165, ENSG00000095059, ENSG00000137876, ENSG00000241343, ENSG00000155846, ENSG00000060138, ENSG00000173846, ENSG00000186198, ENSG00000136261, ENSG0000…	276	5824	19277	1.23523	0.202329
GO TERM: BP	GO:0014075~response to amine	GO:0014075	response to amine	5	1.25945	0.00832313	ENSG00000153234, ENSG00000148908, ENSG00000239672, ENSG00000181019, ENSG00000116741	276	56	19277	6.23609	0.203917
GO TERM: BP	GO:0070125~mitochondrial translational elongation	GO:0070125	mitochondrial translational elongation	6	1.51134	0.00853213	ENSG00000204316, ENSG00000163319, ENSG00000198015, ENSG00000106591, ENSG00000171421, ENSG00000136522	276	88	19277	4.7621	0.207723
GO TERM: MF	GO:0050136~NADH dehydrogenase (quinone) activity	GO:0050136	NADH dehydrogenase (quinone) activity	5	1.25945	0.00408346	ENSG00000189043, ENSG00000198888, ENSG00000147684, ENSG00000198804, ENSG00000181019	234	47	16739	7.61002	0.211653
GO TERM: MF	GO:0016651~oxidoreductase activity, acting on NAD(P)H	GO:0016651	oxidoreductase activity, acting on NAD(P)H	7	1.76322	0.00419709	ENSG00000189043, ENSG00000120658, ENSG00000198888, ENSG00000147684, ENSG00000136810, ENSG00000198804, ENSG00000181019	234	109	16739	4.59394	0.211653
GO TERM: BP	GO:0070126~mitochondrial translational termination	GO:0070126	mitochondrial translational termination	6	1.51134	0.00893735	ENSG00000204316, ENSG00000163319, ENSG00000198015, ENSG00000106591, ENSG00000171421, ENSG00000136522	276	89	19277	4.7086	0.216228
GO TERM: MF	GO:0015002~heme-copper terminal oxidase activity	GO:0015002	heme-copper terminal oxidase activity	4	1.00756	0.00546491	ENSG00000198938, ENSG00000198712, ENSG00000131174, ENSG00000198804	234	26	16739	11.0053	0.224647
GO TERM: MF	GO:0004129~cytochrome-c oxidase activity	GO:0004129	cytochrome-c oxidase activity	4	1.00756	0.00546491	ENSG00000198938, ENSG00000198712, ENSG00000131174, ENSG00000198804	234	26	16739	11.0053	0.224647
GO TERM: MF	GO:0016676~oxidoreductase activity, acting on a heme group of donors, oxygen as acceptor	GO:0016676	oxidoreductase activity, acting on a heme group of donors, oxygen as acceptor	4	1.00756	0.00546491	ENSG00000198938, ENSG00000198712, ENSG00000131174, ENSG00000198804	234	26	16739	11.0053	0.224647
GO TERM: MF	GO:0046983~protein dimerization activity	GO:0046983	protein dimerization activity	27	6.80101	0.00572754	ENSG00000153234, ENSG00000158406, ENSG00000276180, ENSG00000180573, ENSG00000277075, ENSG00000115758, ENSG00000116649, ENSG00000136997, ENSG00000134853, ENSG00000136810, ENSG00000196747, ENSG00000274641, ENSG00000197903, ENSG00000166016, ENSG00000184260, ENSG00000188763, ENSG00000275714, ENSG00000088992, ENSG00000181218, ENSG00000134323, ENSG00000186395, ENSG00000274276, ENSG00000102879, ENSG0000…	234	1100	16739	1.75584	0.224647
GO TERM: CC	GO:0005912~adherens junction	GO:0005912	adherens junction	16	4.03023	0.0273314	ENSG00000137818, ENSG00000213741, ENSG00000131469, ENSG00000110700, ENSG00000198910, ENSG00000197756, ENSG00000171863, ENSG00000197958, ENSG00000145425, ENSG00000163682, ENSG00000231500, ENSG00000156482, ENSG00000187678, ENSG00000164587, ENSG00000182774, ENSG00000142534	266	561	17223	1.84665	0.22652
GO TERM: CC	GO:0098554~cytoplasmic side of endoplasmic reticulum membrane	GO:0098554	cytoplasmic side of endoplasmic reticulum membrane	3	0.755668	0.0275498	ENSG00000233927, ENSG00000213741, ENSG00000131469	266	17	17223	11.4261	0.22652
GO TERM: CC	GO:0044421~extracellular region part	GO:0044421	extracellular region part	75	18.8917	0.0276244	ENSG00000153993, ENSG00000158406, ENSG00000213741, ENSG00000180573, ENSG00000163638, ENSG00000243678, ENSG00000110700, ENSG00000167680, ENSG00000136810, ENSG00000221493, ENSG00000184260, ENSG00000100902, ENSG00000157193, ENSG00000207547, ENSG00000275714, ENSG00000109475, ENSG00000162998, ENSG00000090402, ENSG00000181218, ENSG00000106003, ENSG00000099974, ENSG00000179431, ENSG00000173898, ENSG0000…	266	3919	17223	1.23912	0.22652
GO TERM: MF	GO:0043021~ribonucleoprotein complex binding	GO:0043021	ribonucleoprotein complex binding	8	2.01511	0.00625775	ENSG00000137818, ENSG00000060138, ENSG00000261236, ENSG00000005100, ENSG00000143977, ENSG00000108561, ENSG00000185238, ENSG00000239672	234	156	16739	3.66842	0.22682
GO TERM: MF	GO:0070181~small ribosomal subunit rRNA binding	GO:0070181	small ribosomal subunit rRNA binding	3	0.755668	0.00651188	ENSG00000163319, ENSG00000110700, ENSG00000164587	234	9	16739	23.8447	0.22682
GO TERM: MF	GO:0016675~oxidoreductase activity, acting on a heme group of donors	GO:0016675	oxidoreductase activity, acting on a heme group of donors	4	1.00756	0.00674677	ENSG00000198938, ENSG00000198712, ENSG00000131174, ENSG00000198804	234	28	16739	10.2192	0.22682
GO TERM: BP	GO:0008104~protein localization	GO:0008104	protein localization	56	14.1058	0.00977168	ENSG00000213741, ENSG00000163638, ENSG00000110700, ENSG00000171863, ENSG00000136810, ENSG00000135521, ENSG00000163682, ENSG00000171858, ENSG00000172428, ENSG00000084734, ENSG00000109475, ENSG00000217930, ENSG00000241343, ENSG00000132661, ENSG00000233927, ENSG00000197958, ENSG00000173846, ENSG00000203772, ENSG00000186198, ENSG00000166441, ENSG00000231500, ENSG00000284946, ENSG00000143947, ENSG0000…	276	2833	19277	1.38061	0.234945
GO TERM: BP	GO:0006576~cellular biogenic amine metabolic process	GO:0006576	cellular biogenic amine metabolic process	5	1.25945	0.00997781	ENSG00000116771, ENSG00000095059, ENSG00000115758, ENSG00000116649, ENSG00000130066	276	59	19277	5.919	0.23842
GO TERM: BP	GO:0015980~energy derivation by oxidation of organic compounds	GO:0015980	energy derivation by oxidation of organic compounds	11	2.77078	0.0100415	ENSG00000198938, ENSG00000004779, ENSG00000189043, ENSG00000168275, ENSG00000132382, ENSG00000198712, ENSG00000198888, ENSG00000131174, ENSG00000147684, ENSG00000136997, ENSG00000198804	276	295	19277	2.60436	0.23847
GO TERM: CC	GO:0043505~CENP-A containing nucleosome	GO:0043505	CENP-A containing nucleosome	3	0.755668	0.030684	ENSG00000158406, ENSG00000276180, ENSG00000277075	266	18	17223	10.7914	0.239627
GO TERM: CC	GO:0034719~SMN-Sm protein complex	GO:0034719	SMN-Sm protein complex	3	0.755668	0.030684	ENSG00000172062, ENSG00000143977, ENSG00000182004	266	18	17223	10.7914	0.239627
GO TERM: CC	GO:0061638~CENP-A containing chromatin	GO:0061638	CENP-A containing chromatin	3	0.755668	0.030684	ENSG00000158406, ENSG00000276180, ENSG00000277075	266	18	17223	10.7914	0.239627
GO TERM: CC	GO:0070161~anchoring junction	GO:0070161	anchoring junction	16	4.03023	0.0338314	ENSG00000137818, ENSG00000213741, ENSG00000131469, ENSG00000110700, ENSG00000198910, ENSG00000197756, ENSG00000171863, ENSG00000197958, ENSG00000145425, ENSG00000163682, ENSG00000231500, ENSG00000156482, ENSG00000187678, ENSG00000164587, ENSG00000182774, ENSG00000142534	266	577	17223	1.79544	0.256989
GO TERM: CC	GO:0034506~chromosome, centromeric core domain	GO:0034506	chromosome, centromeric core domain	3	0.755668	0.0339518	ENSG00000158406, ENSG00000276180, ENSG00000277075	266	19	17223	10.2234	0.256989
GO TERM: BP	GO:1902253~regulation of intrinsic apoptotic signaling pathway by p53 class mediator	GO:1902253	regulation of intrinsic apoptotic signaling pathway by p53 class mediator	4	1.00756	0.0124	ENSG00000207721, ENSG00000161970, ENSG00000171863, ENSG00000136997	276	34	19277	8.21697	0.291994
GO TERM: BP	GO:0043065~positive regulation of apoptotic process	GO:0043065	positive regulation of apoptotic process	19	4.78589	0.0124462	ENSG00000111424, ENSG00000132382, ENSG00000171863, ENSG00000136997, ENSG00000163220, ENSG00000188763, ENSG00000185088, ENSG00000138172, ENSG00000124802, ENSG00000207721, ENSG00000143947, ENSG00000108561, ENSG00000161970, ENSG00000162998, ENSG00000142856, ENSG00000181649, ENSG00000181019, ENSG00000141378, ENSG00000102760	276	703	19277	1.88768	0.291994
GO TERM: MF	GO:0016209~antioxidant activity	GO:0016209	antioxidant activity	6	1.51134	0.00923783	ENSG00000163220, ENSG00000176153, ENSG00000204444, ENSG00000257017, ENSG00000136810, ENSG00000181019	234	92	16739	4.66527	0.29645
GO TERM: BP	GO:0006091~generation of precursor metabolites and energy	GO:0006091	generation of precursor metabolites and energy	15	3.77834	0.0127887	ENSG00000176153, ENSG00000004779, ENSG00000132382, ENSG00000198712, ENSG00000198888, ENSG00000131174, ENSG00000136997, ENSG00000198804, ENSG00000198938, ENSG00000084734, ENSG00000189043, ENSG00000168275, ENSG00000147684, ENSG00000181649, ENSG00000101440	276	499	19277	2.09953	0.298223
GO TERM: CC	GO:0045271~respiratory chain complex I	GO:0045271	respiratory chain complex I	4	1.00756	0.0415568	ENSG00000004779, ENSG00000189043, ENSG00000198888, ENSG00000147684	266	50	17223	5.17985	0.300676
GO TERM: CC	GO:0005747~mitochondrial respiratory chain complex I	GO:0005747	mitochondrial respiratory chain complex I	4	1.00756	0.0415568	ENSG00000004779, ENSG00000189043, ENSG00000198888, ENSG00000147684	266	50	17223	5.17985	0.300676
GO TERM: CC	GO:0030964~NADH dehydrogenase complex	GO:0030964	NADH dehydrogenase complex	4	1.00756	0.0415568	ENSG00000004779, ENSG00000189043, ENSG00000198888, ENSG00000147684	266	50	17223	5.17985	0.300676
GO TERM: BP	GO:0098869~cellular oxidant detoxification	GO:0098869	cellular oxidant detoxification	6	1.51134	0.0131969	ENSG00000163220, ENSG00000176153, ENSG00000204444, ENSG00000257017, ENSG00000136810, ENSG00000181019	276	98	19277	4.27618	0.3059
GO TERM: BP	GO:0043068~positive regulation of programmed cell death	GO:0043068	positive regulation of programmed cell death	19	4.78589	0.0138847	ENSG00000111424, ENSG00000132382, ENSG00000171863, ENSG00000136997, ENSG00000163220, ENSG00000188763, ENSG00000185088, ENSG00000138172, ENSG00000124802, ENSG00000207721, ENSG00000143947, ENSG00000108561, ENSG00000161970, ENSG00000162998, ENSG00000142856, ENSG00000181649, ENSG00000181019, ENSG00000141378, ENSG00000102760	276	711	19277	1.86644	0.319927
GO TERM: BP	GO:1904667~negative regulation of ubiquitin protein ligase activity	GO:1904667	negative regulation of ubiquitin protein ligase activity	3	0.755668	0.0142582	ENSG00000008988, ENSG00000164109, ENSG00000171863	276	13	19277	16.1179	0.324667
GO TERM: BP	GO:0030656~regulation of vitamin metabolic process	GO:0030656	regulation of vitamin metabolic process	3	0.755668	0.0142582	ENSG00000111424, ENSG00000185238, ENSG00000111012	276	13	19277	16.1179	0.324667
GO TERM: BP	GO:0000460~maturation of 5.8S rRNA	GO:0000460	maturation of 5.8S rRNA	4	1.00756	0.0144907	ENSG00000171858, ENSG00000261236, ENSG00000179041, ENSG00000124787	276	36	19277	7.76047	0.328032
GO TERM: MF	GO:0016655~oxidoreductase activity, acting on NAD(P)H, quinone or similar compound as acceptor	GO:0016655	oxidoreductase activity, acting on NAD(P)H, quinone or similar compound as acceptor	5	1.25945	0.0108672	ENSG00000189043, ENSG00000198888, ENSG00000147684, ENSG00000198804, ENSG00000181019	234	62	16739	5.76889	0.333577
GO TERM: BP	GO:0006415~translational termination	GO:0006415	translational termination	6	1.51134	0.0148762	ENSG00000204316, ENSG00000163319, ENSG00000198015, ENSG00000106591, ENSG00000171421, ENSG00000136522	276	101	19277	4.14916	0.334801
GO TERM: BP	GO:2001244~positive regulation of intrinsic apoptotic signaling pathway	GO:2001244	positive regulation of intrinsic apoptotic signaling pathway	5	1.25945	0.015388	ENSG00000163220, ENSG00000207721, ENSG00000161970, ENSG00000171863, ENSG00000136997	276	67	19277	5.21225	0.344318
GO TERM: BP	GO:0000462~maturation of SSU-rRNA from tricistronic rRNA transcript (SSU-rRNA, 5.8S rRNA, LSU-rRNA)	GO:0000462	maturation of SSU-rRNA from tricistronic rRNA transcript (SSU-rRNA, 5.8S rRNA, LSU-rRNA)	4	1.00756	0.0156062	ENSG00000171858, ENSG00000179041, ENSG00000124787, ENSG00000164587	276	37	19277	7.55072	0.347194
GO TERM: BP	GO:0006662~glycerol ether metabolic process	GO:0006662	glycerol ether metabolic process	3	0.755668	0.0164795	ENSG00000169710, ENSG00000187546, ENSG00000136810	276	14	19277	14.9666	0.362454
GO TERM: BP	GO:0042363~fat-soluble vitamin catabolic process	GO:0042363	fat-soluble vitamin catabolic process	3	0.755668	0.0164795	ENSG00000170835, ENSG00000186204, ENSG00000111012	276	14	19277	14.9666	0.362454
GO TERM: CC	GO:0030687~preribosome, large subunit precursor	GO:0030687	preribosome, large subunit precursor	3	0.755668	0.0521305	ENSG00000261236, ENSG00000130810, ENSG00000179041	266	24	17223	8.09352	0.371713
GO TERM: BP	GO:0032981~mitochondrial respiratory chain complex I assembly	GO:0032981	mitochondrial respiratory chain complex I assembly	5	1.25945	0.0178119	ENSG00000004779, ENSG00000198888, ENSG00000123545, ENSG00000147684, ENSG00000171202	276	70	19277	4.98887	0.385194
GO TERM: BP	GO:0097031~mitochondrial respiratory chain complex I biogenesis	GO:0097031	mitochondrial respiratory chain complex I biogenesis	5	1.25945	0.0178119	ENSG00000004779, ENSG00000198888, ENSG00000123545, ENSG00000147684, ENSG00000171202	276	70	19277	4.98887	0.385194
GO TERM: BP	GO:0010257~NADH dehydrogenase complex assembly	GO:0010257	NADH dehydrogenase complex assembly	5	1.25945	0.0178119	ENSG00000004779, ENSG00000198888, ENSG00000123545, ENSG00000147684, ENSG00000171202	276	70	19277	4.98887	0.385194
GO TERM: CC	GO:0030054~cell junction	GO:0030054	cell junction	23	5.79345	0.0559675	ENSG00000105289, ENSG00000137818, ENSG00000213741, ENSG00000131469, ENSG00000128298, ENSG00000110700, ENSG00000198910, ENSG00000197756, ENSG00000171863, ENSG00000134853, ENSG00000173898, ENSG00000197958, ENSG00000163220, ENSG00000145425, ENSG00000060138, ENSG00000163682, ENSG00000102879, ENSG00000231500, ENSG00000156482, ENSG00000187678, ENSG00000164587, ENSG00000182774, ENSG00000142534	266	997	17223	1.49369	0.393372
GO TERM: BP	GO:0033036~macromolecule localization	GO:0033036	macromolecule localization	61	15.3652	0.0184504	ENSG00000213741, ENSG00000163638, ENSG00000110700, ENSG00000171863, ENSG00000136810, ENSG00000135521, ENSG00000163682, ENSG00000171858, ENSG00000172428, ENSG00000084734, ENSG00000109475, ENSG00000217930, ENSG00000241343, ENSG00000132661, ENSG00000233927, ENSG00000197958, ENSG00000173846, ENSG00000203772, ENSG00000186198, ENSG00000166441, ENSG00000231500, ENSG00000284946, ENSG00000143947, ENSG0000…	276	3246	19277	1.31254	0.396786
GO TERM: BP	GO:0033108~mitochondrial respiratory chain complex assembly	GO:0033108	mitochondrial respiratory chain complex assembly	6	1.51134	0.0186514	ENSG00000004779, ENSG00000124279, ENSG00000198888, ENSG00000123545, ENSG00000147684, ENSG00000171202	276	107	19277	3.9165	0.398893
GO TERM: MF	GO:0008170~N-methyltransferase activity	GO:0008170	N-methyltransferase activity	6	1.51134	0.0145569	ENSG00000155542, ENSG00000150456, ENSG00000284753, ENSG00000103037, ENSG00000185238, ENSG00000162851	234	103	16739	4.16704	0.412415
GO TERM: MF	GO:0044769~ATPase activity, coupled to transmembrane movement of ions, rotational mechanism	GO:0044769	ATPase activity, coupled to transmembrane movement of ions, rotational mechanism	4	1.00756	0.0146039	ENSG00000228253, ENSG00000169020, ENSG00000198899, ENSG00000241837	234	37	16739	7.73343	0.412415
GO TERM: BP	GO:0045787~positive regulation of cell cycle	GO:0045787	positive regulation of cell cycle	13	3.27456	0.0204537	ENSG00000176165, ENSG00000134419, ENSG00000132382, ENSG00000136997, ENSG00000173846, ENSG00000188763, ENSG00000123975, ENSG00000164362, ENSG00000161970, ENSG00000164109, ENSG00000176170, ENSG00000106003, ENSG00000102760	276	428	19277	2.12144	0.435034
GO TERM: BP	GO:0009636~response to toxic substance	GO:0009636	response to toxic substance	9	2.267	0.0212641	ENSG00000163220, ENSG00000176153, ENSG00000166016, ENSG00000204444, ENSG00000257017, ENSG00000115657, ENSG00000136810, ENSG00000181019, ENSG00000268104	276	238	19277	2.64117	0.448713
GO TERM: BP	GO:0009111~vitamin catabolic process	GO:0009111	vitamin catabolic process	3	0.755668	0.0213286	ENSG00000170835, ENSG00000186204, ENSG00000111012	276	16	19277	13.0958	0.448713
GO TERM: BP	GO:0006839~mitochondrial transport	GO:0006839	mitochondrial transport	10	2.51889	0.0216426	ENSG00000188763, ENSG00000217930, ENSG00000159199, ENSG00000196860, ENSG00000228253, ENSG00000126953, ENSG00000169020, ENSG00000198899, ENSG00000241837, ENSG00000175768	276	285	19277	2.45067	0.452858
GO TERM: BP	GO:0006334~nucleosome assembly	GO:0006334	nucleosome assembly	7	1.76322	0.022014	ENSG00000197903, ENSG00000274641, ENSG00000158406, ENSG00000276180, ENSG00000275714, ENSG00000142856, ENSG00000187837	276	152	19277	3.21651	0.458152
GO TERM: BP	GO:0009165~nucleotide biosynthetic process	GO:0009165	nucleotide biosynthetic process	10	2.51889	0.0221493	ENSG00000243678, ENSG00000159199, ENSG00000228253, ENSG00000198712, ENSG00000169020, ENSG00000198899, ENSG00000241837, ENSG00000136997, ENSG00000239672, ENSG00000106992	276	286	19277	2.4421	0.458503
GO TERM: BP	GO:1901293~nucleoside phosphate biosynthetic process	GO:1901293	nucleoside phosphate biosynthetic process	10	2.51889	0.0232248	ENSG00000243678, ENSG00000159199, ENSG00000228253, ENSG00000198712, ENSG00000169020, ENSG00000198899, ENSG00000241837, ENSG00000136997, ENSG00000239672, ENSG00000106992	276	289	19277	2.41675	0.477066
GO TERM: BP	GO:0045684~positive regulation of epidermis development	GO:0045684	positive regulation of epidermis development	4	1.00756	0.0232926	ENSG00000186395, ENSG00000243678, ENSG00000111424, ENSG00000111012	276	43	19277	6.49714	0.477066
GO TERM: BP	GO:0045618~positive regulation of keratinocyte differentiation	GO:0045618	positive regulation of keratinocyte differentiation	3	0.755668	0.0295553	ENSG00000243678, ENSG00000111424, ENSG00000111012	276	19	19277	11.028	0.598998
GO TERM: BP	GO:0018904~ether metabolic process	GO:0018904	ether metabolic process	3	0.755668	0.0295553	ENSG00000169710, ENSG00000187546, ENSG00000136810	276	19	19277	11.028	0.598998
GO TERM: BP	GO:0030522~intracellular receptor signaling pathway	GO:0030522	intracellular receptor signaling pathway	11	2.77078	0.0297536	ENSG00000153234, ENSG00000158406, ENSG00000169710, ENSG00000276180, ENSG00000111424, ENSG00000275714, ENSG00000143947, ENSG00000108561, ENSG00000155846, ENSG00000164687, ENSG00000111012	276	351	19277	2.18885	0.599875
GO TERM: BP	GO:0034728~nucleosome organization	GO:0034728	nucleosome organization	8	2.01511	0.0320963	ENSG00000197903, ENSG00000274641, ENSG00000158406, ENSG00000276180, ENSG00000275714, ENSG00000142856, ENSG00000181218, ENSG00000187837	276	211	19277	2.64812	0.643755
GO TERM: BP	GO:0006525~arginine metabolic process	GO:0006525	arginine metabolic process	3	0.755668	0.0325353	ENSG00000116771, ENSG00000036473, ENSG00000161653	276	20	19277	10.4766	0.649197
GO TERM: BP	GO:0010941~regulation of cell death	GO:0010941	regulation of cell death	37	9.3199	0.0327376	ENSG00000153234, ENSG00000243678, ENSG00000171863, ENSG00000136997, ENSG00000136810, ENSG00000163220, ENSG00000157193, ENSG00000188763, ENSG00000138172, ENSG00000207721, ENSG00000108561, ENSG00000162998, ENSG00000123545, ENSG00000239672, ENSG00000181019, ENSG00000141378, ENSG00000176170, ENSG00000102760, ENSG00000106541, ENSG00000217930, ENSG00000111424, ENSG00000132382, ENSG00000198712, ENSG0000…	276	1843	19277	1.40219	0.649884
GO TERM: BP	GO:0006333~chromatin assembly or disassembly	GO:0006333	chromatin assembly or disassembly	8	2.01511	0.0335635	ENSG00000197903, ENSG00000274641, ENSG00000158406, ENSG00000276180, ENSG00000275714, ENSG00000142856, ENSG00000181218, ENSG00000187837	276	213	19277	2.62326	0.662879
GO TERM: BP	GO:0000959~mitochondrial RNA metabolic process	GO:0000959	mitochondrial RNA metabolic process	4	1.00756	0.0344166	ENSG00000119705, ENSG00000124279, ENSG00000155846, ENSG00000162851	276	50	19277	5.58754	0.672863
GO TERM: BP	GO:0006775~fat-soluble vitamin metabolic process	GO:0006775	fat-soluble vitamin metabolic process	4	1.00756	0.0344166	ENSG00000170835, ENSG00000111424, ENSG00000186204, ENSG00000111012	276	50	19277	5.58754	0.672863
GO TERM: MF	GO:0008137~NADH dehydrogenase (ubiquinone) activity	GO:0008137	NADH dehydrogenase (ubiquinone) activity	4	1.00756	0.0260541	ENSG00000189043, ENSG00000198888, ENSG00000147684, ENSG00000198804	234	46	16739	6.22036	0.707468
GO TERM: BP	GO:0033574~response to testosterone	GO:0033574	response to testosterone	4	1.00756	0.038017	ENSG00000136997, ENSG00000239672, ENSG00000181019, ENSG00000118785	276	52	19277	5.37263	0.739516
GO TERM: MF	GO:0019887~protein kinase regulator activity	GO:0019887	protein kinase regulator activity	8	2.01511	0.0304767	ENSG00000137818, ENSG00000135549, ENSG00000123975, ENSG00000240053, ENSG00000187678, ENSG00000088992, ENSG00000185338, ENSG00000102760	234	214	16739	2.67418	0.741884
GO TERM: MF	GO:0033293~monocarboxylic acid binding	GO:0033293	monocarboxylic acid binding	5	1.25945	0.0308672	ENSG00000163220, ENSG00000004779, ENSG00000243678, ENSG00000111424, ENSG00000164687	234	85	16739	4.20789	0.741884
GO TERM: MF	GO:0004550~nucleoside diphosphate kinase activity	GO:0004550	nucleoside diphosphate kinase activity	3	0.755668	0.0310885	ENSG00000243678, ENSG00000239672, ENSG00000106992	234	20	16739	10.7301	0.741884
GO TERM: MF	GO:0015399~primary active transmembrane transporter activity	GO:0015399	primary active transmembrane transporter activity	6	1.51134	0.0315248	ENSG00000198938, ENSG00000115657, ENSG00000228253, ENSG00000169020, ENSG00000198899, ENSG00000241837	234	126	16739	3.40639	0.741884
GO TERM: MF	GO:0031406~carboxylic acid binding	GO:0031406	carboxylic acid binding	8	2.01511	0.0330432	ENSG00000163220, ENSG00000004779, ENSG00000243678, ENSG00000111424, ENSG00000111325, ENSG00000036473, ENSG00000161653, ENSG00000164687	234	218	16739	2.62511	0.752532
GO TERM: BP	GO:0000387~spliceosomal snRNP assembly	GO:0000387	spliceosomal snRNP assembly	4	1.00756	0.0398864	ENSG00000172062, ENSG00000143977, ENSG00000201654, ENSG00000182004	276	53	19277	5.27126	0.772002
GO TERM: MF	GO:0003729~mRNA binding	GO:0003729	mRNA binding	15	3.77834	0.0351267	ENSG00000110700, ENSG00000171863, ENSG00000136997, ENSG00000145425, ENSG00000060138, ENSG00000207547, ENSG00000114391, ENSG00000005100, ENSG00000124107, ENSG00000207721, ENSG00000108561, ENSG00000156482, ENSG00000161960, ENSG00000161970, ENSG00000164587	234	586	16739	1.83108	0.774984
GO TERM: MF	GO:0016407~acetyltransferase activity	GO:0016407	acetyltransferase activity	5	1.25945	0.0369456	ENSG00000169710, ENSG00000185818, ENSG00000161653, ENSG00000130066, ENSG00000176170	234	90	16739	3.97412	0.77827
GO TERM: MF	GO:0005504~fatty acid binding	GO:0005504	fatty acid binding	4	1.00756	0.0374804	ENSG00000163220, ENSG00000004779, ENSG00000243678, ENSG00000164687	234	53	16739	5.39881	0.77827
GO TERM: BP	GO:0055114~oxidation-reduction process	GO:0055114	oxidation-reduction process	14	3.52645	0.041651	ENSG00000176153, ENSG00000004779, ENSG00000132382, ENSG00000198712, ENSG00000198888, ENSG00000131174, ENSG00000136997, ENSG00000198804, ENSG00000198938, ENSG00000189043, ENSG00000204444, ENSG00000168275, ENSG00000147684, ENSG00000181019	276	530	19277	1.84494	0.796702
GO TERM: BP	GO:0051444~negative regulation of ubiquitin-protein transferase activity	GO:0051444	negative regulation of ubiquitin-protein transferase activity	3	0.755668	0.0421346	ENSG00000008988, ENSG00000164109, ENSG00000171863	276	23	19277	9.11011	0.796702
GO TERM: BP	GO:0071824~protein-DNA complex subunit organization	GO:0071824	protein-DNA complex subunit organization	11	2.77078	0.0421661	ENSG00000197903, ENSG00000274641, ENSG00000158406, ENSG00000276180, ENSG00000100902, ENSG00000275714, ENSG00000143947, ENSG00000142856, ENSG00000136997, ENSG00000181218, ENSG00000187837	276	373	19277	2.05975	0.796702
GO TERM: BP	GO:0010979~regulation of vitamin D 24-hydroxylase activity	GO:0010979	regulation of vitamin D 24-hydroxylase activity	2	0.503778	0.0421916	ENSG00000111424, ENSG00000111012	276	3	19277	46.5628	0.796702
GO TERM: BP	GO:0010980~positive regulation of vitamin D 24-hydroxylase activity	GO:0010980	positive regulation of vitamin D 24-hydroxylase activity	2	0.503778	0.0421916	ENSG00000111424, ENSG00000111012	276	3	19277	46.5628	0.796702
GO TERM: MF	GO:0043177~organic acid binding	GO:0043177	organic acid binding	8	2.01511	0.0413385	ENSG00000163220, ENSG00000004779, ENSG00000243678, ENSG00000111424, ENSG00000111325, ENSG00000036473, ENSG00000161653, ENSG00000164687	234	229	16739	2.49901	0.828957
GO TERM: MF	GO:0009055~electron carrier activity	GO:0009055	electron carrier activity	5	1.25945	0.0422698	ENSG00000198938, ENSG00000176153, ENSG00000198712, ENSG00000131174, ENSG00000198804	234	94	16739	3.80501	0.828957
GO TERM: BP	GO:0097164~ammonium ion metabolic process	GO:0097164	ammonium ion metabolic process	8	2.01511	0.0457495	ENSG00000153234, ENSG00000116771, ENSG00000095059, ENSG00000115758, ENSG00000116649, ENSG00000164687, ENSG00000130066, ENSG00000176170	276	228	19277	2.45067	0.855894
GO TERM: BP	GO:0006120~mitochondrial electron transport, NADH to ubiquinone	GO:0006120	mitochondrial electron transport, NADH to ubiquinone	4	1.00756	0.0457685	ENSG00000004779, ENSG00000189043, ENSG00000198888, ENSG00000147684	276	56	19277	4.98887	0.855894
GO TERM: BP	GO:0042981~regulation of apoptotic process	GO:0042981	regulation of apoptotic process	33	8.31234	0.0481234	ENSG00000153234, ENSG00000243678, ENSG00000171863, ENSG00000136997, ENSG00000163220, ENSG00000157193, ENSG00000188763, ENSG00000138172, ENSG00000207721, ENSG00000108561, ENSG00000162998, ENSG00000123545, ENSG00000239672, ENSG00000181019, ENSG00000141378, ENSG00000176170, ENSG00000102760, ENSG00000217930, ENSG00000111424, ENSG00000132382, ENSG00000137955, ENSG00000060138, ENSG00000145425, ENSG0000…	276	1655	19277	1.39266	0.895605
GO TERM: BP	GO:0007589~body fluid secretion	GO:0007589	body fluid secretion	5	1.25945	0.04863	ENSG00000170835, ENSG00000111424, ENSG00000198712, ENSG00000239672, ENSG00000106541	276	96	19277	3.63772	0.900702
GO TERM: BP	GO:0007050~cell cycle arrest	GO:0007050	cell cycle arrest	8	2.01511	0.0492672	ENSG00000188130, ENSG00000173846, ENSG00000188763, ENSG00000132382, ENSG00000161970, ENSG00000136997, ENSG00000102760, ENSG00000106992	276	232	19277	2.40842	0.908158

## Sheet: KEGG
Category	Term	ID	Pathway	Count	%	PValue	Genes	List Total	Pop Hits	Pop Total	Fold Enrichment	Benjamini padj
KEGG_PATHWAY	hsa03010:Ribosome	hsa03010	Ribosome	36	9.06801	7.95276e-29	ENSG00000213741, ENSG00000131469, ENSG00000163319, ENSG00000110700, ENSG00000134419, ENSG00000112306, ENSG00000171421, ENSG00000265681, ENSG00000197756, ENSG00000171863, ENSG00000275215, ENSG00000163682, ENSG00000171858, ENSG00000163584, ENSG00000198918, ENSG00000156482, ENSG00000109475, ENSG00000137818, ENSG00000118181, ENSG00000008988, ENSG00000137876, ENSG00000241343, ENSG00000233927, ENSG0000…	151	158	8112	12.2404	1.5826e-26
KEGG_PATHWAY	hsa05171:Coronavirus disease - COVID-19	hsa05171	Coronavirus disease - COVID-19	33	8.31234	1.06804e-19	ENSG00000213741, ENSG00000131469, ENSG00000110700, ENSG00000134419, ENSG00000112306, ENSG00000265681, ENSG00000197756, ENSG00000171863, ENSG00000163682, ENSG00000171858, ENSG00000163584, ENSG00000198918, ENSG00000156482, ENSG00000109475, ENSG00000137818, ENSG00000118181, ENSG00000008988, ENSG00000137876, ENSG00000241343, ENSG00000233927, ENSG00000197958, ENSG00000145425, ENSG00000188130, ENSG0000…	151	232	8112	7.64147	1.0627e-17
KEGG_PATHWAY	hsa00190:Oxidative phosphorylation	hsa00190	Oxidative phosphorylation	13	3.27456	6.2399e-06	ENSG00000004779, ENSG00000228253, ENSG00000198712, ENSG00000169020, ENSG00000198888, ENSG00000198899, ENSG00000131174, ENSG00000198804, ENSG00000198938, ENSG00000189043, ENSG00000159199, ENSG00000147684, ENSG00000241837	151	134	8112	5.21182	0.000413913
KEGG_PATHWAY	hsa04714:Thermogenesis	hsa04714	Thermogenesis	16	4.03023	2.33887e-05	ENSG00000004779, ENSG00000228253, ENSG00000198712, ENSG00000169020, ENSG00000198888, ENSG00000198899, ENSG00000131174, ENSG00000198804, ENSG00000198938, ENSG00000188130, ENSG00000189043, ENSG00000159199, ENSG00000168275, ENSG00000147684, ENSG00000123545, ENSG00000241837	151	232	8112	3.70496	0.00116359
KEGG_PATHWAY	hsa05208:Chemical carcinogenesis - reactive oxygen species	hsa05208	Chemical carcinogenesis - reactive oxygen species	14	3.52645	0.000236823	ENSG00000004779, ENSG00000228253, ENSG00000198712, ENSG00000198888, ENSG00000198899, ENSG00000131174, ENSG00000198804, ENSG00000198938, ENSG00000188130, ENSG00000189043, ENSG00000159199, ENSG00000147684, ENSG00000241837, ENSG00000181019	151	223	8112	3.37267	0.00942555
KEGG_PATHWAY	hsa05415:Diabetic cardiomyopathy	hsa05415	Diabetic cardiomyopathy	13	3.27456	0.000364185	ENSG00000004779, ENSG00000228253, ENSG00000198712, ENSG00000198888, ENSG00000198899, ENSG00000131174, ENSG00000198804, ENSG00000198938, ENSG00000188130, ENSG00000189043, ENSG00000159199, ENSG00000147684, ENSG00000241837	151	203	8112	3.44032	0.0111061
KEGG_PATHWAY	hsa05012:Parkinson disease	hsa05012	Parkinson disease	15	3.77834	0.000390668	ENSG00000004779, ENSG00000228253, ENSG00000198712, ENSG00000198888, ENSG00000198899, ENSG00000131174, ENSG00000136810, ENSG00000198804, ENSG00000198938, ENSG00000100902, ENSG00000189043, ENSG00000159199, ENSG00000143947, ENSG00000147684, ENSG00000241837	151	266	8112	3.02943	0.0111061
KEGG_PATHWAY	hsa05322:Systemic lupus erythematosus	hsa05322	Systemic lupus erythematosus	10	2.51889	0.00090413	ENSG00000197903, ENSG00000274641, ENSG00000158406, ENSG00000184260, ENSG00000276180, ENSG00000180573, ENSG00000275714, ENSG00000277075, ENSG00000181218, ENSG00000196747	151	136	8112	3.95014	0.0224902
KEGG_PATHWAY	hsa00970:Aminoacyl-tRNA biosynthesis	hsa00970	Aminoacyl-tRNA biosynthesis	7	1.76322	0.00131814	ENSG00000210144, ENSG00000210077, ENSG00000209082, ENSG00000247626, ENSG00000210117, ENSG00000179988, ENSG00000210195	151	66	8112	5.69777	0.0291456
KEGG_PATHWAY	hsa05020:Prion disease	hsa05020	Prion disease	14	3.52645	0.00158885	ENSG00000004779, ENSG00000228253, ENSG00000198712, ENSG00000198888, ENSG00000198899, ENSG00000131174, ENSG00000198804, ENSG00000198938, ENSG00000188130, ENSG00000100902, ENSG00000189043, ENSG00000159199, ENSG00000147684, ENSG00000241837	151	273	8112	2.75497	0.031618
KEGG_PATHWAY	hsa04613:Neutrophil extracellular trap formation	hsa04613	Neutrophil extracellular trap formation	11	2.77078	0.00268699	ENSG00000197903, ENSG00000274641, ENSG00000158406, ENSG00000188130, ENSG00000184260, ENSG00000276180, ENSG00000180573, ENSG00000275714, ENSG00000277075, ENSG00000181218, ENSG00000196747	151	190	8112	3.11021	0.0484909
KEGG_PATHWAY	hsa05014:Amyotrophic lateral sclerosis	hsa05014	Amyotrophic lateral sclerosis	16	4.03023	0.00292407	ENSG00000176153, ENSG00000004779, ENSG00000228253, ENSG00000198712, ENSG00000198888, ENSG00000198899, ENSG00000131174, ENSG00000132661, ENSG00000198804, ENSG00000198938, ENSG00000188130, ENSG00000100902, ENSG00000189043, ENSG00000159199, ENSG00000147684, ENSG00000241837	151	364	8112	2.3614	0.0484909
KEGG_PATHWAY	hsa05016:Huntington disease	hsa05016	Huntington disease	14	3.52645	0.00428774	ENSG00000176153, ENSG00000004779, ENSG00000228253, ENSG00000198712, ENSG00000198888, ENSG00000198899, ENSG00000131174, ENSG00000198804, ENSG00000198938, ENSG00000100902, ENSG00000189043, ENSG00000159199, ENSG00000147684, ENSG00000241837	151	306	8112	2.45786	0.0656354
KEGG_PATHWAY	hsa05022:Pathways of neurodegeneration - multiple diseases	hsa05022	Pathways of neurodegeneration - multiple diseases	18	4.53401	0.00669112	ENSG00000176153, ENSG00000004779, ENSG00000228253, ENSG00000198712, ENSG00000198888, ENSG00000198899, ENSG00000131174, ENSG00000198804, ENSG00000173898, ENSG00000198938, ENSG00000188130, ENSG00000100902, ENSG00000189043, ENSG00000188763, ENSG00000159199, ENSG00000143947, ENSG00000147684, ENSG00000241837	151	476	8112	2.0315	0.0951095
KEGG_PATHWAY	hsa05034:Alcoholism	hsa05034	Alcoholism	10	2.51889	0.00773888	ENSG00000197903, ENSG00000274641, ENSG00000158406, ENSG00000184260, ENSG00000276180, ENSG00000180573, ENSG00000275714, ENSG00000277075, ENSG00000181218, ENSG00000196747	151	187	8112	2.87283	0.102669
KEGG_PATHWAY	hsa04932:Non-alcoholic fatty liver disease	hsa04932	Non-alcoholic fatty liver disease	8	2.01511	0.0246553	ENSG00000198938, ENSG00000188130, ENSG00000004779, ENSG00000189043, ENSG00000198712, ENSG00000131174, ENSG00000147684, ENSG00000198804	151	155	8112	2.77274	0.29584
KEGG_PATHWAY	hsa05010:Alzheimer disease	hsa05010	Alzheimer disease	14	3.52645	0.0252728	ENSG00000004779, ENSG00000228253, ENSG00000198712, ENSG00000198888, ENSG00000198899, ENSG00000131174, ENSG00000198804, ENSG00000198938, ENSG00000100902, ENSG00000189043, ENSG00000188763, ENSG00000159199, ENSG00000147684, ENSG00000241837	151	384	8112	1.95861	0.29584

## Sheet: Reactome
Category	Term	ID	Pathway	Count	%	PValue	Genes	List Total	Pop Hits	Pop Total	Fold Enrichment	Benjamini padj
REACTOME_PATHWAY	R-HSA-2408557~Selenocysteine synthesis	R-HSA-2408557	Selenocysteine synthesis	32	8.06045	1.17158e-31	ENSG00000213741, ENSG00000131469, ENSG00000110700, ENSG00000134419, ENSG00000112306, ENSG00000265681, ENSG00000179988, ENSG00000197756, ENSG00000171863, ENSG00000163682, ENSG00000171858, ENSG00000163584, ENSG00000198918, ENSG00000156482, ENSG00000109475, ENSG00000137818, ENSG00000118181, ENSG00000008988, ENSG00000241343, ENSG00000233927, ENSG00000197958, ENSG00000145425, ENSG00000114391, ENSG0000…	191	93	10538	18.9842	9.32579e-29
REACTOME_PATHWAY	R-HSA-156902~Peptide chain elongation	R-HSA-156902	Peptide chain elongation	31	7.80856	8.04246e-31	ENSG00000213741, ENSG00000131469, ENSG00000110700, ENSG00000134419, ENSG00000112306, ENSG00000265681, ENSG00000197756, ENSG00000171863, ENSG00000163682, ENSG00000171858, ENSG00000163584, ENSG00000198918, ENSG00000156482, ENSG00000109475, ENSG00000137818, ENSG00000118181, ENSG00000008988, ENSG00000241343, ENSG00000233927, ENSG00000197958, ENSG00000145425, ENSG00000114391, ENSG00000185088, ENSG0000…	191	89	10538	19.2175	1.62285e-28
REACTOME_PATHWAY	R-HSA-192823~Viral mRNA Translation	R-HSA-192823	Viral mRNA Translation	31	7.80856	8.04246e-31	ENSG00000213741, ENSG00000131469, ENSG00000110700, ENSG00000134419, ENSG00000112306, ENSG00000265681, ENSG00000197756, ENSG00000171863, ENSG00000163682, ENSG00000171858, ENSG00000163584, ENSG00000198918, ENSG00000156482, ENSG00000109475, ENSG00000137818, ENSG00000118181, ENSG00000008988, ENSG00000241343, ENSG00000233927, ENSG00000197958, ENSG00000145425, ENSG00000114391, ENSG00000185088, ENSG0000…	191	89	10538	19.2175	1.62285e-28
REACTOME_PATHWAY	R-HSA-2408522~Selenoamino acid metabolism	R-HSA-2408522	Selenoamino acid metabolism	34	8.56423	8.15505e-31	ENSG00000213741, ENSG00000131469, ENSG00000110700, ENSG00000134419, ENSG00000112306, ENSG00000265681, ENSG00000179988, ENSG00000197756, ENSG00000171863, ENSG00000163682, ENSG00000171858, ENSG00000163584, ENSG00000198918, ENSG00000156482, ENSG00000109475, ENSG00000137818, ENSG00000118181, ENSG00000008988, ENSG00000241343, ENSG00000233927, ENSG00000197958, ENSG00000145425, ENSG00000274276, ENSG0000…	191	118	10538	15.8972	1.62285e-28
REACTOME_PATHWAY	R-HSA-72689~Formation of a pool of free 40S subunits	R-HSA-72689	Formation of a pool of free 40S subunits	32	8.06045	2.21834e-30	ENSG00000213741, ENSG00000131469, ENSG00000110700, ENSG00000134419, ENSG00000112306, ENSG00000104408, ENSG00000265681, ENSG00000197756, ENSG00000171863, ENSG00000163682, ENSG00000171858, ENSG00000163584, ENSG00000198918, ENSG00000156482, ENSG00000109475, ENSG00000137818, ENSG00000118181, ENSG00000008988, ENSG00000241343, ENSG00000233927, ENSG00000197958, ENSG00000145425, ENSG00000114391, ENSG0000…	191	101	10538	17.4805	3.05838e-28
REACTOME_PATHWAY	R-HSA-156827~L13a-mediated translational silencing of Ceruloplasmin expression	R-HSA-156827	L13a-mediated translational silencing of Ceruloplasmin expression	33	8.31234	2.30531e-30	ENSG00000213741, ENSG00000131469, ENSG00000110700, ENSG00000134419, ENSG00000112306, ENSG00000104408, ENSG00000265681, ENSG00000197756, ENSG00000171863, ENSG00000163682, ENSG00000171858, ENSG00000163584, ENSG00000198918, ENSG00000156482, ENSG00000109475, ENSG00000161960, ENSG00000137818, ENSG00000118181, ENSG00000008988, ENSG00000241343, ENSG00000233927, ENSG00000197958, ENSG00000145425, ENSG0000…	191	111	10538	16.4027	3.05838e-28
REACTOME_PATHWAY	R-HSA-72706~GTP hydrolysis and joining of the 60S ribosomal subunit	R-HSA-72706	GTP hydrolysis and joining of the 60S ribosomal subunit	33	8.31234	3.17853e-30	ENSG00000213741, ENSG00000131469, ENSG00000110700, ENSG00000134419, ENSG00000112306, ENSG00000104408, ENSG00000265681, ENSG00000197756, ENSG00000171863, ENSG00000163682, ENSG00000171858, ENSG00000163584, ENSG00000198918, ENSG00000156482, ENSG00000109475, ENSG00000161960, ENSG00000137818, ENSG00000118181, ENSG00000008988, ENSG00000241343, ENSG00000233927, ENSG00000197958, ENSG00000145425, ENSG0000…	191	112	10538	16.2563	3.27786e-28
REACTOME_PATHWAY	R-HSA-72764~Eukaryotic Translation Termination	R-HSA-72764	Eukaryotic Translation Termination	31	7.80856	3.70613e-30	ENSG00000213741, ENSG00000131469, ENSG00000110700, ENSG00000134419, ENSG00000112306, ENSG00000265681, ENSG00000197756, ENSG00000171863, ENSG00000163682, ENSG00000171858, ENSG00000163584, ENSG00000198918, ENSG00000156482, ENSG00000109475, ENSG00000137818, ENSG00000118181, ENSG00000008988, ENSG00000241343, ENSG00000233927, ENSG00000197958, ENSG00000145425, ENSG00000114391, ENSG00000185088, ENSG0000…	191	93	10538	18.3909	3.27786e-28
REACTOME_PATHWAY	R-HSA-156842~Eukaryotic Translation Elongation	R-HSA-156842	Eukaryotic Translation Elongation	31	7.80856	3.70613e-30	ENSG00000213741, ENSG00000131469, ENSG00000110700, ENSG00000134419, ENSG00000112306, ENSG00000265681, ENSG00000197756, ENSG00000171863, ENSG00000163682, ENSG00000171858, ENSG00000163584, ENSG00000198918, ENSG00000156482, ENSG00000109475, ENSG00000137818, ENSG00000118181, ENSG00000008988, ENSG00000241343, ENSG00000233927, ENSG00000197958, ENSG00000145425, ENSG00000114391, ENSG00000185088, ENSG0000…	191	93	10538	18.3909	3.27786e-28
REACTOME_PATHWAY	R-HSA-975956~Nonsense Mediated Decay (NMD) independent of the Exon Junction Complex (EJC)	R-HSA-975956	Nonsense Mediated Decay (NMD) independent of the Exon Junction Complex (EJC)	31	7.80856	7.71382e-30	ENSG00000213741, ENSG00000131469, ENSG00000110700, ENSG00000134419, ENSG00000112306, ENSG00000265681, ENSG00000197756, ENSG00000171863, ENSG00000163682, ENSG00000171858, ENSG00000163584, ENSG00000198918, ENSG00000156482, ENSG00000109475, ENSG00000137818, ENSG00000118181, ENSG00000008988, ENSG00000241343, ENSG00000233927, ENSG00000197958, ENSG00000145425, ENSG00000114391, ENSG00000185088, ENSG0000…	191	95	10538	18.0037	6.1402e-28
REACTOME_PATHWAY	R-HSA-72613~Eukaryotic Translation Initiation	R-HSA-72613	Eukaryotic Translation Initiation	33	8.31234	2.73811e-29	ENSG00000213741, ENSG00000131469, ENSG00000110700, ENSG00000134419, ENSG00000112306, ENSG00000104408, ENSG00000265681, ENSG00000197756, ENSG00000171863, ENSG00000163682, ENSG00000171858, ENSG00000163584, ENSG00000198918, ENSG00000156482, ENSG00000109475, ENSG00000161960, ENSG00000137818, ENSG00000118181, ENSG00000008988, ENSG00000241343, ENSG00000233927, ENSG00000197958, ENSG00000145425, ENSG0000…	191	119	10538	15.3	1.81628e-27
REACTOME_PATHWAY	R-HSA-72737~Cap-dependent Translation Initiation	R-HSA-72737	Cap-dependent Translation Initiation	33	8.31234	2.73811e-29	ENSG00000213741, ENSG00000131469, ENSG00000110700, ENSG00000134419, ENSG00000112306, ENSG00000104408, ENSG00000265681, ENSG00000197756, ENSG00000171863, ENSG00000163682, ENSG00000171858, ENSG00000163584, ENSG00000198918, ENSG00000156482, ENSG00000109475, ENSG00000161960, ENSG00000137818, ENSG00000118181, ENSG00000008988, ENSG00000241343, ENSG00000233927, ENSG00000197958, ENSG00000145425, ENSG0000…	191	119	10538	15.3	1.81628e-27
REACTOME_PATHWAY	R-HSA-9633012~Response of EIF2AK4 (GCN2) to amino acid deficiency	R-HSA-9633012	Response of EIF2AK4 (GCN2) to amino acid deficiency	31	7.80856	6.22185e-29	ENSG00000213741, ENSG00000131469, ENSG00000110700, ENSG00000134419, ENSG00000112306, ENSG00000265681, ENSG00000197756, ENSG00000171863, ENSG00000163682, ENSG00000171858, ENSG00000163584, ENSG00000198918, ENSG00000156482, ENSG00000109475, ENSG00000137818, ENSG00000118181, ENSG00000008988, ENSG00000241343, ENSG00000233927, ENSG00000197958, ENSG00000145425, ENSG00000114391, ENSG00000185088, ENSG0000…	191	101	10538	16.9342	3.80969e-27
REACTOME_PATHWAY	R-HSA-1799339~SRP-dependent cotranslational protein targeting to membrane	R-HSA-1799339	SRP-dependent cotranslational protein targeting to membrane	32	8.06045	8.10924e-29	ENSG00000213741, ENSG00000131469, ENSG00000110700, ENSG00000134419, ENSG00000112306, ENSG00000265681, ENSG00000197756, ENSG00000171863, ENSG00000163682, ENSG00000171858, ENSG00000163584, ENSG00000198918, ENSG00000156482, ENSG00000109475, ENSG00000137818, ENSG00000118181, ENSG00000008988, ENSG00000241343, ENSG00000233927, ENSG00000197958, ENSG00000145425, ENSG00000114391, ENSG00000185088, ENSG0000…	191	112	10538	15.7636	4.61068e-27
REACTOME_PATHWAY	R-HSA-6791226~Major pathway of rRNA processing in the nucleolus and cytosol	R-HSA-6791226	Major pathway of rRNA processing in the nucleolus and cytosol	37	9.3199	1.30688e-27	ENSG00000213741, ENSG00000131469, ENSG00000110700, ENSG00000134419, ENSG00000112306, ENSG00000265681, ENSG00000197756, ENSG00000171863, ENSG00000135521, ENSG00000163682, ENSG00000171858, ENSG00000163584, ENSG00000198918, ENSG00000156482, ENSG00000109475, ENSG00000101361, ENSG00000137818, ENSG00000261236, ENSG00000077348, ENSG00000118181, ENSG00000115946, ENSG00000008988, ENSG00000241343, ENSG0000…	191	184	10538	11.0945	6.93516e-26
REACTOME_PATHWAY	R-HSA-975957~Nonsense Mediated Decay (NMD) enhanced by the Exon Junction Complex (EJC)	R-HSA-975957	Nonsense Mediated Decay (NMD) enhanced by the Exon Junction Complex (EJC)	31	7.80856	4.69467e-27	ENSG00000213741, ENSG00000131469, ENSG00000110700, ENSG00000134419, ENSG00000112306, ENSG00000265681, ENSG00000197756, ENSG00000171863, ENSG00000163682, ENSG00000171858, ENSG00000163584, ENSG00000198918, ENSG00000156482, ENSG00000109475, ENSG00000137818, ENSG00000118181, ENSG00000008988, ENSG00000241343, ENSG00000233927, ENSG00000197958, ENSG00000145425, ENSG00000114391, ENSG00000185088, ENSG0000…	191	115	10538	14.8727	2.19821e-25
REACTOME_PATHWAY	R-HSA-927802~Nonsense-Mediated Decay (NMD)	R-HSA-927802	Nonsense-Mediated Decay (NMD)	31	7.80856	4.69467e-27	ENSG00000213741, ENSG00000131469, ENSG00000110700, ENSG00000134419, ENSG00000112306, ENSG00000265681, ENSG00000197756, ENSG00000171863, ENSG00000163682, ENSG00000171858, ENSG00000163584, ENSG00000198918, ENSG00000156482, ENSG00000109475, ENSG00000137818, ENSG00000118181, ENSG00000008988, ENSG00000241343, ENSG00000233927, ENSG00000197958, ENSG00000145425, ENSG00000114391, ENSG00000185088, ENSG0000…	191	115	10538	14.8727	2.19821e-25
REACTOME_PATHWAY	R-HSA-8868773~rRNA processing in the nucleus and cytosol	R-HSA-8868773	rRNA processing in the nucleus and cytosol	37	9.3199	9.25542e-27	ENSG00000213741, ENSG00000131469, ENSG00000110700, ENSG00000134419, ENSG00000112306, ENSG00000265681, ENSG00000197756, ENSG00000171863, ENSG00000135521, ENSG00000163682, ENSG00000171858, ENSG00000163584, ENSG00000198918, ENSG00000156482, ENSG00000109475, ENSG00000101361, ENSG00000137818, ENSG00000261236, ENSG00000077348, ENSG00000118181, ENSG00000115946, ENSG00000008988, ENSG00000241343, ENSG0000…	191	194	10538	10.5226	4.09295e-25
REACTOME_PATHWAY	R-HSA-72312~rRNA processing	R-HSA-72312	rRNA processing	37	9.3199	5.83037e-26	ENSG00000213741, ENSG00000131469, ENSG00000110700, ENSG00000134419, ENSG00000112306, ENSG00000265681, ENSG00000197756, ENSG00000171863, ENSG00000135521, ENSG00000163682, ENSG00000171858, ENSG00000163584, ENSG00000198918, ENSG00000156482, ENSG00000109475, ENSG00000101361, ENSG00000137818, ENSG00000261236, ENSG00000077348, ENSG00000118181, ENSG00000115946, ENSG00000008988, ENSG00000241343, ENSG0000…	191	204	10538	10.0068	2.44262e-24
REACTOME_PATHWAY	R-HSA-72766~Translation	R-HSA-72766	Translation	42	10.5793	1.39673e-25	ENSG00000213741, ENSG00000131469, ENSG00000163319, ENSG00000110700, ENSG00000134419, ENSG00000112306, ENSG00000171421, ENSG00000104408, ENSG00000265681, ENSG00000197756, ENSG00000171863, ENSG00000204316, ENSG00000163682, ENSG00000171858, ENSG00000163584, ENSG00000198918, ENSG00000156482, ENSG00000109475, ENSG00000161960, ENSG00000137818, ENSG00000118181, ENSG00000247626, ENSG00000198015, ENSG0000…	191	291	10538	7.96308	5.55899e-24
REACTOME_PATHWAY	R-HSA-168273~Influenza Viral RNA Transcription and Replication	R-HSA-168273	Influenza Viral RNA Transcription and Replication	31	7.80856	8.25316e-25	ENSG00000213741, ENSG00000131469, ENSG00000110700, ENSG00000134419, ENSG00000112306, ENSG00000265681, ENSG00000197756, ENSG00000171863, ENSG00000163682, ENSG00000171858, ENSG00000163584, ENSG00000198918, ENSG00000156482, ENSG00000109475, ENSG00000137818, ENSG00000118181, ENSG00000008988, ENSG00000241343, ENSG00000233927, ENSG00000197958, ENSG00000145425, ENSG00000114391, ENSG00000185088, ENSG0000…	191	135	10538	12.6693	3.12834e-23
REACTOME_PATHWAY	R-HSA-71291~Metabolism of amino acids and derivatives	R-HSA-71291	Metabolism of amino acids and derivatives	44	11.0831	3.22327e-23	ENSG00000213741, ENSG00000131469, ENSG00000004779, ENSG00000115758, ENSG00000110700, ENSG00000134419, ENSG00000116649, ENSG00000112306, ENSG00000265681, ENSG00000179988, ENSG00000197756, ENSG00000171863, ENSG00000163682, ENSG00000171858, ENSG00000163584, ENSG00000198918, ENSG00000100902, ENSG00000036473, ENSG00000156482, ENSG00000109475, ENSG00000181019, ENSG00000137818, ENSG00000185818, ENSG0000…	191	374	10538	6.49091	1.16624e-21
REACTOME_PATHWAY	R-HSA-168255~Influenza Infection	R-HSA-168255	Influenza Infection	31	7.80856	7.5425e-23	ENSG00000213741, ENSG00000131469, ENSG00000110700, ENSG00000134419, ENSG00000112306, ENSG00000265681, ENSG00000197756, ENSG00000171863, ENSG00000163682, ENSG00000171858, ENSG00000163584, ENSG00000198918, ENSG00000156482, ENSG00000109475, ENSG00000137818, ENSG00000118181, ENSG00000008988, ENSG00000241343, ENSG00000233927, ENSG00000197958, ENSG00000145425, ENSG00000114391, ENSG00000185088, ENSG0000…	191	156	10538	10.9638	2.5016e-21
REACTOME_PATHWAY	R-HSA-9711097~Cellular response to starvation	R-HSA-9711097	Cellular response to starvation	31	7.80856	7.5425e-23	ENSG00000213741, ENSG00000131469, ENSG00000110700, ENSG00000134419, ENSG00000112306, ENSG00000265681, ENSG00000197756, ENSG00000171863, ENSG00000163682, ENSG00000171858, ENSG00000163584, ENSG00000198918, ENSG00000156482, ENSG00000109475, ENSG00000137818, ENSG00000118181, ENSG00000008988, ENSG00000241343, ENSG00000233927, ENSG00000197958, ENSG00000145425, ENSG00000114391, ENSG00000185088, ENSG0000…	191	156	10538	10.9638	2.5016e-21
REACTOME_PATHWAY	R-HSA-9010553~Regulation of expression of SLITs and ROBOs	R-HSA-9010553	Regulation of expression of SLITs and ROBOs	32	8.06045	8.84136e-23	ENSG00000213741, ENSG00000131469, ENSG00000110700, ENSG00000134419, ENSG00000112306, ENSG00000265681, ENSG00000197756, ENSG00000171863, ENSG00000163682, ENSG00000171858, ENSG00000163584, ENSG00000198918, ENSG00000100902, ENSG00000156482, ENSG00000109475, ENSG00000137818, ENSG00000118181, ENSG00000008988, ENSG00000241343, ENSG00000233927, ENSG00000197958, ENSG00000145425, ENSG00000114391, ENSG0000…	191	171	10538	10.3247	2.81509e-21
REACTOME_PATHWAY	R-HSA-376176~Signaling by ROBO receptors	R-HSA-376176	Signaling by ROBO receptors	32	8.06045	1.53089e-19	ENSG00000213741, ENSG00000131469, ENSG00000110700, ENSG00000134419, ENSG00000112306, ENSG00000265681, ENSG00000197756, ENSG00000171863, ENSG00000163682, ENSG00000171858, ENSG00000163584, ENSG00000198918, ENSG00000100902, ENSG00000156482, ENSG00000109475, ENSG00000137818, ENSG00000118181, ENSG00000008988, ENSG00000241343, ENSG00000233927, ENSG00000197958, ENSG00000145425, ENSG00000114391, ENSG0000…	191	218	10538	8.09876	4.68689e-18
REACTOME_PATHWAY	R-HSA-72649~Translation initiation complex formation	R-HSA-72649	Translation initiation complex formation	18	4.53401	1.08928e-16	ENSG00000213741, ENSG00000118181, ENSG00000110700, ENSG00000134419, ENSG00000112306, ENSG00000008988, ENSG00000104408, ENSG00000171863, ENSG00000233927, ENSG00000145425, ENSG00000171858, ENSG00000185088, ENSG00000231500, ENSG00000143947, ENSG00000161960, ENSG00000164587, ENSG00000182774, ENSG00000142534	191	58	10538	17.1226	3.09666e-15
REACTOME_PATHWAY	R-HSA-72702~Ribosomal scanning and start codon recognition	R-HSA-72702	Ribosomal scanning and start codon recognition	18	4.53401	1.08928e-16	ENSG00000213741, ENSG00000118181, ENSG00000110700, ENSG00000134419, ENSG00000112306, ENSG00000008988, ENSG00000104408, ENSG00000171863, ENSG00000233927, ENSG00000145425, ENSG00000171858, ENSG00000185088, ENSG00000231500, ENSG00000143947, ENSG00000161960, ENSG00000164587, ENSG00000182774, ENSG00000142534	191	58	10538	17.1226	3.09666e-15
REACTOME_PATHWAY	R-HSA-72662~Activation of the mRNA upon binding of the cap-binding complex and eIFs, and subsequent binding to 43S	R-HSA-72662	Activation of the mRNA upon binding of the cap-binding complex and eIFs, and subsequent binding to 43S	18	4.53401	1.50491e-16	ENSG00000213741, ENSG00000118181, ENSG00000110700, ENSG00000134419, ENSG00000112306, ENSG00000008988, ENSG00000104408, ENSG00000171863, ENSG00000233927, ENSG00000145425, ENSG00000171858, ENSG00000185088, ENSG00000231500, ENSG00000143947, ENSG00000161960, ENSG00000164587, ENSG00000182774, ENSG00000142534	191	59	10538	16.8324	4.13073e-15
REACTOME_PATHWAY	R-HSA-2262752~Cellular responses to stress	R-HSA-2262752	Cellular responses to stress	51	12.8463	1.77751e-16	ENSG00000158406, ENSG00000176153, ENSG00000213741, ENSG00000180573, ENSG00000110700, ENSG00000171863, ENSG00000136810, ENSG00000198938, ENSG00000163682, ENSG00000171858, ENSG00000184260, ENSG00000100902, ENSG00000275714, ENSG00000109475, ENSG00000132622, ENSG00000241343, ENSG00000131174, ENSG00000233927, ENSG00000197958, ENSG00000166441, ENSG00000231500, ENSG00000143947, ENSG00000187522, ENSG0000…	191	757	10538	3.71706	4.71634e-15
REACTOME_PATHWAY	R-HSA-72695~Formation of the ternary complex, and subsequently, the 43S complex	R-HSA-72695	Formation of the ternary complex, and subsequently, the 43S complex	17	4.28212	2.63462e-16	ENSG00000213741, ENSG00000118181, ENSG00000110700, ENSG00000134419, ENSG00000112306, ENSG00000008988, ENSG00000104408, ENSG00000171863, ENSG00000233927, ENSG00000145425, ENSG00000171858, ENSG00000185088, ENSG00000231500, ENSG00000143947, ENSG00000164587, ENSG00000182774, ENSG00000142534	191	51	10538	18.3909	6.76502e-15
REACTOME_PATHWAY	R-HSA-8953897~Cellular responses to stimuli	R-HSA-8953897	Cellular responses to stimuli	51	12.8463	4.85446e-16	ENSG00000158406, ENSG00000176153, ENSG00000213741, ENSG00000180573, ENSG00000110700, ENSG00000171863, ENSG00000136810, ENSG00000198938, ENSG00000163682, ENSG00000171858, ENSG00000184260, ENSG00000100902, ENSG00000275714, ENSG00000109475, ENSG00000132622, ENSG00000241343, ENSG00000131174, ENSG00000233927, ENSG00000197958, ENSG00000166441, ENSG00000231500, ENSG00000143947, ENSG00000187522, ENSG0000…	191	771	10538	3.64956	1.20755e-14
REACTOME_PATHWAY	R-HSA-8953854~Metabolism of RNA	R-HSA-8953854	Metabolism of RNA	45	11.335	3.0993e-14	ENSG00000213741, ENSG00000131469, ENSG00000110700, ENSG00000134419, ENSG00000112306, ENSG00000265681, ENSG00000197756, ENSG00000171863, ENSG00000135521, ENSG00000163682, ENSG00000171858, ENSG00000163584, ENSG00000198918, ENSG00000100902, ENSG00000143977, ENSG00000156482, ENSG00000109475, ENSG00000161960, ENSG00000182004, ENSG00000275895, ENSG00000101361, ENSG00000172062, ENSG00000137818, ENSG0000…	191	673	10538	3.68912	7.47589e-13
REACTOME_PATHWAY	R-HSA-422475~Axon guidance	R-HSA-422475	Axon guidance	36	9.06801	4.96156e-11	ENSG00000213741, ENSG00000131469, ENSG00000110700, ENSG00000134419, ENSG00000112306, ENSG00000265681, ENSG00000197756, ENSG00000171863, ENSG00000189056, ENSG00000163682, ENSG00000171858, ENSG00000163584, ENSG00000198918, ENSG00000100902, ENSG00000156482, ENSG00000109475, ENSG00000137818, ENSG00000118181, ENSG00000008988, ENSG00000241343, ENSG00000198910, ENSG00000173898, ENSG00000233927, ENSG0000…	191	552	10538	3.59822	1.16159e-09
REACTOME_PATHWAY	R-HSA-1430728~Metabolism	R-HSA-1430728	Metabolism	78	19.6474	6.86277e-11	ENSG00000176153, ENSG00000213741, ENSG00000004779, ENSG00000243678, ENSG00000110700, ENSG00000115758, ENSG00000116649, ENSG00000169020, ENSG00000179988, ENSG00000171863, ENSG00000136810, ENSG00000198938, ENSG00000163682, ENSG00000171858, ENSG00000100902, ENSG00000084734, ENSG00000157193, ENSG00000186204, ENSG00000109475, ENSG00000123545, ENSG00000181019, ENSG00000185818, ENSG00000111424, ENSG0000…	191	2121	10538	2.02898	1.56079e-09
REACTOME_PATHWAY	R-HSA-9675108~Nervous system development	R-HSA-9675108	Nervous system development	36	9.06801	1.68411e-10	ENSG00000213741, ENSG00000131469, ENSG00000110700, ENSG00000134419, ENSG00000112306, ENSG00000265681, ENSG00000197756, ENSG00000171863, ENSG00000189056, ENSG00000163682, ENSG00000171858, ENSG00000163584, ENSG00000198918, ENSG00000100902, ENSG00000156482, ENSG00000109475, ENSG00000137818, ENSG00000118181, ENSG00000008988, ENSG00000241343, ENSG00000198910, ENSG00000173898, ENSG00000233927, ENSG0000…	191	577	10538	3.44232	3.72374e-09
REACTOME_PATHWAY	R-HSA-392499~Metabolism of proteins	R-HSA-392499	Metabolism of proteins	73	18.3879	2.88165e-10	ENSG00000158406, ENSG00000153234, ENSG00000213741, ENSG00000180573, ENSG00000163638, ENSG00000163319, ENSG00000110700, ENSG00000171421, ENSG00000171863, ENSG00000136810, ENSG00000204316, ENSG00000163682, ENSG00000171858, ENSG00000184260, ENSG00000100902, ENSG00000275714, ENSG00000109475, ENSG00000181218, ENSG00000185238, ENSG00000141378, ENSG00000095059, ENSG00000111424, ENSG00000198015, ENSG0000…	191	1966	10538	2.04863	6.19944e-09
REACTOME_PATHWAY	R-HSA-5663205~Infectious disease	R-HSA-5663205	Infectious disease	44	11.0831	1.01222e-09	ENSG00000213741, ENSG00000158406, ENSG00000131469, ENSG00000276180, ENSG00000180573, ENSG00000277075, ENSG00000110700, ENSG00000134419, ENSG00000112306, ENSG00000265681, ENSG00000197756, ENSG00000171863, ENSG00000136810, ENSG00000196747, ENSG00000274641, ENSG00000197903, ENSG00000163682, ENSG00000171858, ENSG00000163584, ENSG00000198918, ENSG00000184260, ENSG00000100902, ENSG00000275714, ENSG0000…	191	881	10538	2.75551	2.12033e-08
REACTOME_PATHWAY	R-HSA-1266738~Developmental Biology	R-HSA-1266738	Developmental Biology	48	12.0907	2.32581e-08	ENSG00000213741, ENSG00000158406, ENSG00000131469, ENSG00000276180, ENSG00000180573, ENSG00000277075, ENSG00000110700, ENSG00000134419, ENSG00000112306, ENSG00000265681, ENSG00000197756, ENSG00000171863, ENSG00000136997, ENSG00000274641, ENSG00000197903, ENSG00000189056, ENSG00000163682, ENSG00000171858, ENSG00000163584, ENSG00000198918, ENSG00000184260, ENSG00000100902, ENSG00000275714, ENSG0000…	191	1127	10538	2.34986	4.74704e-07
REACTOME_PATHWAY	R-HSA-163200~Respiratory electron transport, ATP synthesis by chemiosmotic coupling, and heat production by uncoupling proteins.	R-HSA-163200	Respiratory electron transport, ATP synthesis by chemiosmotic coupling, and heat production by uncoupling proteins.	14	3.52645	4.45459e-07	ENSG00000004779, ENSG00000228253, ENSG00000198712, ENSG00000169020, ENSG00000198888, ENSG00000198899, ENSG00000131174, ENSG00000198804, ENSG00000198938, ENSG00000189043, ENSG00000159199, ENSG00000147684, ENSG00000123545, ENSG00000241837	191	127	10538	6.08204	8.86463e-06
REACTOME_PATHWAY	R-HSA-1643685~Disease	R-HSA-1643685	Disease	55	13.8539	7.72094e-06	ENSG00000158406, ENSG00000213741, ENSG00000180573, ENSG00000163638, ENSG00000110700, ENSG00000171863, ENSG00000136810, ENSG00000163682, ENSG00000171858, ENSG00000184260, ENSG00000100902, ENSG00000084734, ENSG00000275714, ENSG00000109475, ENSG00000090402, ENSG00000181218, ENSG00000106003, ENSG00000241343, ENSG00000233927, ENSG00000197958, ENSG00000102879, ENSG00000166441, ENSG00000231500, ENSG0000…	191	1676	10538	1.81056	0.000149899
REACTOME_PATHWAY	R-HSA-1428517~The citric acid (TCA) cycle and respiratory electron transport	R-HSA-1428517	The citric acid (TCA) cycle and respiratory electron transport	14	3.52645	1.93822e-05	ENSG00000004779, ENSG00000228253, ENSG00000198712, ENSG00000169020, ENSG00000198888, ENSG00000198899, ENSG00000131174, ENSG00000198804, ENSG00000198938, ENSG00000189043, ENSG00000159199, ENSG00000147684, ENSG00000123545, ENSG00000241837	191	178	10538	4.33943	0.000367338
REACTOME_PATHWAY	R-HSA-427359~SIRT1 negatively regulates rRNA expression	R-HSA-427359	SIRT1 negatively regulates rRNA expression	9	2.267	2.82506e-05	ENSG00000197903, ENSG00000274641, ENSG00000158406, ENSG00000184260, ENSG00000276180, ENSG00000180573, ENSG00000275714, ENSG00000277075, ENSG00000166012	191	68	10538	7.30228	0.000522964
REACTOME_PATHWAY	R-HSA-5250924~B-WICH complex positively regulates rRNA expression	R-HSA-5250924	B-WICH complex positively regulates rRNA expression	10	2.51889	3.65365e-05	ENSG00000197903, ENSG00000274641, ENSG00000158406, ENSG00000184260, ENSG00000276180, ENSG00000180573, ENSG00000275714, ENSG00000277075, ENSG00000166012, ENSG00000132382	191	91	10538	6.06294	0.000646289
REACTOME_PATHWAY	R-HSA-201722~Formation of the beta-catenin:TCF transactivating complex	R-HSA-201722	Formation of the beta-catenin:TCF transactivating complex	10	2.51889	3.65365e-05	ENSG00000197903, ENSG00000274641, ENSG00000158406, ENSG00000184260, ENSG00000276180, ENSG00000180573, ENSG00000275714, ENSG00000277075, ENSG00000164362, ENSG00000136997	191	91	10538	6.06294	0.000646289
REACTOME_PATHWAY	R-HSA-3214815~HDACs deacetylate histones	R-HSA-3214815	HDACs deacetylate histones	10	2.51889	4.73358e-05	ENSG00000197903, ENSG00000274641, ENSG00000158406, ENSG00000184260, ENSG00000276180, ENSG00000180573, ENSG00000275714, ENSG00000277075, ENSG00000181218, ENSG00000196747	191	94	10538	5.86944	0.000819115
REACTOME_PATHWAY	R-HSA-3214858~RMTs methylate histone arginines	R-HSA-3214858	RMTs methylate histone arginines	9	2.267	8.42129e-05	ENSG00000158406, ENSG00000184260, ENSG00000276180, ENSG00000180573, ENSG00000275714, ENSG00000277075, ENSG00000185238, ENSG00000181218, ENSG00000196747	191	79	10538	6.28551	0.00142624
REACTOME_PATHWAY	R-HSA-5250913~Positive epigenetic regulation of rRNA expression	R-HSA-5250913	Positive epigenetic regulation of rRNA expression	10	2.51889	0.000121394	ENSG00000197903, ENSG00000274641, ENSG00000158406, ENSG00000184260, ENSG00000276180, ENSG00000180573, ENSG00000275714, ENSG00000277075, ENSG00000166012, ENSG00000132382	191	106	10538	5.20498	0.00201312
REACTOME_PATHWAY	R-HSA-73728~RNA Polymerase I Promoter Opening	R-HSA-73728	RNA Polymerase I Promoter Opening	8	2.01511	0.000130732	ENSG00000197903, ENSG00000274641, ENSG00000158406, ENSG00000184260, ENSG00000276180, ENSG00000180573, ENSG00000275714, ENSG00000277075	191	63	10538	7.00607	0.00212373
REACTOME_PATHWAY	R-HSA-912446~Meiotic recombination	R-HSA-912446	Meiotic recombination	9	2.267	0.000153847	ENSG00000197903, ENSG00000274641, ENSG00000158406, ENSG00000184260, ENSG00000276180, ENSG00000180573, ENSG00000275714, ENSG00000277075, ENSG00000121211	191	86	10538	5.7739	0.00244924
REACTOME_PATHWAY	R-HSA-5334118~DNA methylation	R-HSA-5334118	DNA methylation	8	2.01511	0.000159589	ENSG00000197903, ENSG00000274641, ENSG00000158406, ENSG00000184260, ENSG00000276180, ENSG00000180573, ENSG00000275714, ENSG00000277075	191	65	10538	6.7905	0.00249084
REACTOME_PATHWAY	R-HSA-977225~Amyloid fiber formation	R-HSA-977225	Amyloid fiber formation	10	2.51889	0.000172914	ENSG00000197903, ENSG00000274641, ENSG00000090382, ENSG00000158406, ENSG00000184260, ENSG00000276180, ENSG00000180573, ENSG00000275714, ENSG00000277075, ENSG00000143947	191	111	10538	4.97052	0.00264692
REACTOME_PATHWAY	R-HSA-5625886~Activated PKN1 stimulates transcription of AR (androgen receptor) regulated genes KLK2 and KLK3	R-HSA-5625886	Activated PKN1 stimulates transcription of AR (androgen receptor) regulated genes KLK2 and KLK3	8	2.01511	0.000193399	ENSG00000197903, ENSG00000274641, ENSG00000158406, ENSG00000184260, ENSG00000276180, ENSG00000180573, ENSG00000275714, ENSG00000277075	191	67	10538	6.58779	0.00290464
REACTOME_PATHWAY	R-HSA-9616222~Transcriptional regulation of granulopoiesis	R-HSA-9616222	Transcriptional regulation of granulopoiesis	9	2.267	0.000211397	ENSG00000197903, ENSG00000274641, ENSG00000158406, ENSG00000184260, ENSG00000276180, ENSG00000180573, ENSG00000275714, ENSG00000277075, ENSG00000136997	191	90	10538	5.51728	0.00311615
REACTOME_PATHWAY	R-HSA-73772~RNA Polymerase I Promoter Escape	R-HSA-73772	RNA Polymerase I Promoter Escape	9	2.267	0.000228251	ENSG00000197903, ENSG00000274641, ENSG00000158406, ENSG00000184260, ENSG00000276180, ENSG00000180573, ENSG00000275714, ENSG00000277075, ENSG00000166012	191	91	10538	5.45665	0.00330342
REACTOME_PATHWAY	R-HSA-68616~Assembly of the ORC complex at the origin of replication	R-HSA-68616	Assembly of the ORC complex at the origin of replication	8	2.01511	0.000232773	ENSG00000197903, ENSG00000274641, ENSG00000158406, ENSG00000184260, ENSG00000276180, ENSG00000180573, ENSG00000275714, ENSG00000277075	191	69	10538	6.39684	0.0033087
REACTOME_PATHWAY	R-HSA-9610379~HCMV Late Events	R-HSA-9610379	HCMV Late Events	10	2.51889	0.000241504	ENSG00000197903, ENSG00000274641, ENSG00000158406, ENSG00000184260, ENSG00000276180, ENSG00000180573, ENSG00000275714, ENSG00000277075, ENSG00000181218, ENSG00000196747	191	116	10538	4.75627	0.00337259
REACTOME_PATHWAY	R-HSA-163210~Formation of ATP by chemiosmotic coupling	R-HSA-163210	Formation of ATP by chemiosmotic coupling	5	1.25945	0.00025701	ENSG00000159199, ENSG00000228253, ENSG00000169020, ENSG00000198899, ENSG00000241837	191	18	10538	15.3258	0.00352725
REACTOME_PATHWAY	R-HSA-171306~Packaging Of Telomere Ends	R-HSA-171306	Packaging Of Telomere Ends	7	1.76322	0.000324337	ENSG00000197903, ENSG00000274641, ENSG00000158406, ENSG00000184260, ENSG00000276180, ENSG00000180573, ENSG00000277075	191	52	10538	7.4271	0.00431766
REACTOME_PATHWAY	R-HSA-212300~PRC2 methylates histones and DNA	R-HSA-212300	PRC2 methylates histones and DNA	8	2.01511	0.000330876	ENSG00000197903, ENSG00000274641, ENSG00000158406, ENSG00000184260, ENSG00000276180, ENSG00000180573, ENSG00000275714, ENSG00000277075	191	73	10538	6.04633	0.00431766
REACTOME_PATHWAY	R-HSA-9710421~Defective pyroptosis	R-HSA-9710421	Defective pyroptosis	8	2.01511	0.000330876	ENSG00000197903, ENSG00000274641, ENSG00000158406, ENSG00000184260, ENSG00000276180, ENSG00000180573, ENSG00000275714, ENSG00000277075	191	73	10538	6.04633	0.00431766
REACTOME_PATHWAY	R-HSA-2299718~Condensation of Prophase Chromosomes	R-HSA-2299718	Condensation of Prophase Chromosomes	8	2.01511	0.000359957	ENSG00000197903, ENSG00000274641, ENSG00000158406, ENSG00000184260, ENSG00000276180, ENSG00000180573, ENSG00000275714, ENSG00000277075	191	74	10538	5.96462	0.00447697
REACTOME_PATHWAY	R-HSA-606279~Deposition of new CENPA-containing nucleosomes at the centromere	R-HSA-606279	Deposition of new CENPA-containing nucleosomes at the centromere	8	2.01511	0.000359957	ENSG00000197903, ENSG00000274641, ENSG00000158406, ENSG00000184260, ENSG00000276180, ENSG00000180573, ENSG00000277075, ENSG00000142856	191	74	10538	5.96462	0.00447697
REACTOME_PATHWAY	R-HSA-774815~Nucleosome assembly	R-HSA-774815	Nucleosome assembly	8	2.01511	0.000359957	ENSG00000197903, ENSG00000274641, ENSG00000158406, ENSG00000184260, ENSG00000276180, ENSG00000180573, ENSG00000277075, ENSG00000142856	191	74	10538	5.96462	0.00447697
REACTOME_PATHWAY	R-HSA-2559580~Oxidative Stress Induced Senescence	R-HSA-2559580	Oxidative Stress Induced Senescence	10	2.51889	0.000421609	ENSG00000197903, ENSG00000274641, ENSG00000158406, ENSG00000184260, ENSG00000276180, ENSG00000180573, ENSG00000275714, ENSG00000277075, ENSG00000143947, ENSG00000136810	191	125	10538	4.41382	0.0051168
REACTOME_PATHWAY	R-HSA-427389~ERCC6 (CSB) and EHMT2 (G9a) positively regulate rRNA expression	R-HSA-427389	ERCC6 (CSB) and EHMT2 (G9a) positively regulate rRNA expression	8	2.01511	0.000424257	ENSG00000197903, ENSG00000274641, ENSG00000158406, ENSG00000184260, ENSG00000276180, ENSG00000180573, ENSG00000275714, ENSG00000277075	191	76	10538	5.80766	0.0051168
REACTOME_PATHWAY	R-HSA-73927~Depurination	R-HSA-73927	Depurination	7	1.76322	0.000487332	ENSG00000197903, ENSG00000274641, ENSG00000158406, ENSG00000184260, ENSG00000276180, ENSG00000180573, ENSG00000277075	191	56	10538	6.8966	0.00560763
REACTOME_PATHWAY	R-HSA-110331~Cleavage of the damaged purine	R-HSA-110331	Cleavage of the damaged purine	7	1.76322	0.000487332	ENSG00000197903, ENSG00000274641, ENSG00000158406, ENSG00000184260, ENSG00000276180, ENSG00000180573, ENSG00000277075	191	56	10538	6.8966	0.00560763
REACTOME_PATHWAY	R-HSA-110330~Recognition and association of DNA glycosylase with site containing an affected purine	R-HSA-110330	Recognition and association of DNA glycosylase with site containing an affected purine	7	1.76322	0.000487332	ENSG00000197903, ENSG00000274641, ENSG00000158406, ENSG00000184260, ENSG00000276180, ENSG00000180573, ENSG00000277075	191	56	10538	6.8966	0.00560763
REACTOME_PATHWAY	R-HSA-5689901~Metalloprotease DUBs	R-HSA-5689901	Metalloprotease DUBs	6	1.51134	0.000493133	ENSG00000184260, ENSG00000180573, ENSG00000277075, ENSG00000143947, ENSG00000181218, ENSG00000196747	191	37	10538	8.94694	0.00560763
REACTOME_PATHWAY	R-HSA-611105~Respiratory electron transport	R-HSA-611105	Respiratory electron transport	9	2.267	0.000531494	ENSG00000198938, ENSG00000004779, ENSG00000189043, ENSG00000198712, ENSG00000198888, ENSG00000131174, ENSG00000123545, ENSG00000147684, ENSG00000198804	191	103	10538	4.82092	0.00587596
REACTOME_PATHWAY	R-HSA-9645723~Diseases of programmed cell death	R-HSA-9645723	Diseases of programmed cell death	9	2.267	0.000531494	ENSG00000197903, ENSG00000274641, ENSG00000158406, ENSG00000184260, ENSG00000276180, ENSG00000180573, ENSG00000275714, ENSG00000277075, ENSG00000108561	191	103	10538	4.82092	0.00587596
REACTOME_PATHWAY	R-HSA-68867~Assembly of the pre-replicative complex	R-HSA-68867	Assembly of the pre-replicative complex	10	2.51889	0.000562075	ENSG00000197903, ENSG00000274641, ENSG00000158406, ENSG00000184260, ENSG00000276180, ENSG00000100902, ENSG00000180573, ENSG00000275714, ENSG00000277075, ENSG00000143947	191	130	10538	4.24406	0.0060461
REACTOME_PATHWAY	R-HSA-8939236~RUNX1 regulates transcription of genes involved in differentiation of HSCs	R-HSA-8939236	RUNX1 regulates transcription of genes involved in differentiation of HSCs	10	2.51889	0.000562075	ENSG00000197903, ENSG00000274641, ENSG00000158406, ENSG00000184260, ENSG00000276180, ENSG00000100902, ENSG00000180573, ENSG00000275714, ENSG00000277075, ENSG00000143947	191	130	10538	4.24406	0.0060461
REACTOME_PATHWAY	R-HSA-2559586~DNA Damage/Telomere Stress Induced Senescence	R-HSA-2559586	DNA Damage/Telomere Stress Induced Senescence	8	2.01511	0.000580309	ENSG00000197903, ENSG00000274641, ENSG00000158406, ENSG00000184260, ENSG00000276180, ENSG00000180573, ENSG00000277075, ENSG00000187837	191	80	10538	5.51728	0.00615902
REACTOME_PATHWAY	R-HSA-427413~NoRC negatively regulates rRNA expression	R-HSA-427413	NoRC negatively regulates rRNA expression	9	2.267	0.000685448	ENSG00000197903, ENSG00000274641, ENSG00000158406, ENSG00000184260, ENSG00000276180, ENSG00000180573, ENSG00000275714, ENSG00000277075, ENSG00000166012	191	107	10538	4.6407	0.00717916
REACTOME_PATHWAY	R-HSA-9609690~HCMV Early Events	R-HSA-9609690	HCMV Early Events	10	2.51889	0.000738811	ENSG00000197903, ENSG00000274641, ENSG00000158406, ENSG00000184260, ENSG00000276180, ENSG00000180573, ENSG00000275714, ENSG00000277075, ENSG00000181218, ENSG00000196747	191	135	10538	4.08687	0.00761504
REACTOME_PATHWAY	R-HSA-110329~Cleavage of the damaged pyrimidine	R-HSA-110329	Cleavage of the damaged pyrimidine	7	1.76322	0.000773643	ENSG00000197903, ENSG00000274641, ENSG00000158406, ENSG00000184260, ENSG00000276180, ENSG00000180573, ENSG00000277075	191	61	10538	6.3313	0.00761504
REACTOME_PATHWAY	R-HSA-110328~Recognition and association of DNA glycosylase with site containing an affected pyrimidine	R-HSA-110328	Recognition and association of DNA glycosylase with site containing an affected pyrimidine	7	1.76322	0.000773643	ENSG00000197903, ENSG00000274641, ENSG00000158406, ENSG00000184260, ENSG00000276180, ENSG00000180573, ENSG00000277075	191	61	10538	6.3313	0.00761504
REACTOME_PATHWAY	R-HSA-73928~Depyrimidination	R-HSA-73928	Depyrimidination	7	1.76322	0.000773643	ENSG00000197903, ENSG00000274641, ENSG00000158406, ENSG00000184260, ENSG00000276180, ENSG00000180573, ENSG00000277075	191	61	10538	6.3313	0.00761504
REACTOME_PATHWAY	R-HSA-1912422~Pre-NOTCH Expression and Processing	R-HSA-1912422	Pre-NOTCH Expression and Processing	9	2.267	0.000774898	ENSG00000197903, ENSG00000274641, ENSG00000158406, ENSG00000184260, ENSG00000276180, ENSG00000180573, ENSG00000275714, ENSG00000277075, ENSG00000106003	191	109	10538	4.55555	0.00761504
REACTOME_PATHWAY	R-HSA-5250941~Negative epigenetic regulation of rRNA expression	R-HSA-5250941	Negative epigenetic regulation of rRNA expression	9	2.267	0.000823018	ENSG00000197903, ENSG00000274641, ENSG00000158406, ENSG00000184260, ENSG00000276180, ENSG00000180573, ENSG00000275714, ENSG00000277075, ENSG00000166012	191	110	10538	4.51414	0.00789304
REACTOME_PATHWAY	R-HSA-73854~RNA Polymerase I Promoter Clearance	R-HSA-73854	RNA Polymerase I Promoter Clearance	9	2.267	0.000823018	ENSG00000197903, ENSG00000274641, ENSG00000158406, ENSG00000184260, ENSG00000276180, ENSG00000180573, ENSG00000275714, ENSG00000277075, ENSG00000166012	191	110	10538	4.51414	0.00789304
REACTOME_PATHWAY	R-HSA-73929~Base-Excision Repair, AP Site Formation	R-HSA-73929	Base-Excision Repair, AP Site Formation	7	1.76322	0.000918961	ENSG00000197903, ENSG00000274641, ENSG00000158406, ENSG00000184260, ENSG00000276180, ENSG00000180573, ENSG00000277075	191	63	10538	6.13031	0.00857517
REACTOME_PATHWAY	R-HSA-73864~RNA Polymerase I Transcription	R-HSA-73864	RNA Polymerase I Transcription	9	2.267	0.000926463	ENSG00000197903, ENSG00000274641, ENSG00000158406, ENSG00000184260, ENSG00000276180, ENSG00000180573, ENSG00000275714, ENSG00000277075, ENSG00000166012	191	112	10538	4.43353	0.00857517
REACTOME_PATHWAY	R-HSA-2559582~Senescence-Associated Secretory Phenotype (SASP)	R-HSA-2559582	Senescence-Associated Secretory Phenotype (SASP)	9	2.267	0.000926463	ENSG00000197903, ENSG00000274641, ENSG00000158406, ENSG00000184260, ENSG00000276180, ENSG00000180573, ENSG00000275714, ENSG00000277075, ENSG00000143947	191	112	10538	4.43353	0.00857517
REACTOME_PATHWAY	R-HSA-3214847~HATs acetylate histones	R-HSA-3214847	HATs acetylate histones	10	2.51889	0.00106003	ENSG00000197903, ENSG00000274641, ENSG00000158406, ENSG00000184260, ENSG00000276180, ENSG00000180573, ENSG00000275714, ENSG00000277075, ENSG00000181218, ENSG00000196747	191	142	10538	3.88541	0.00969866
REACTOME_PATHWAY	R-HSA-1500620~Meiosis	R-HSA-1500620	Meiosis	9	2.267	0.00130073	ENSG00000197903, ENSG00000274641, ENSG00000158406, ENSG00000184260, ENSG00000276180, ENSG00000180573, ENSG00000275714, ENSG00000277075, ENSG00000121211	191	118	10538	4.20809	0.0117657
REACTOME_PATHWAY	R-HSA-69002~DNA Replication Pre-Initiation	R-HSA-69002	DNA Replication Pre-Initiation	10	2.51889	0.0013524	ENSG00000197903, ENSG00000274641, ENSG00000158406, ENSG00000184260, ENSG00000276180, ENSG00000100902, ENSG00000180573, ENSG00000275714, ENSG00000277075, ENSG00000143947	191	147	10538	3.75325	0.0120956
REACTOME_PATHWAY	R-HSA-9670095~Inhibition of DNA recombination at telomere	R-HSA-9670095	Inhibition of DNA recombination at telomere	7	1.76322	0.00137442	ENSG00000197903, ENSG00000274641, ENSG00000158406, ENSG00000184260, ENSG00000276180, ENSG00000180573, ENSG00000277075	191	68	10538	5.67955	0.012156
REACTOME_PATHWAY	R-HSA-1912408~Pre-NOTCH Transcription and Translation	R-HSA-1912408	Pre-NOTCH Transcription and Translation	8	2.01511	0.00142239	ENSG00000197903, ENSG00000274641, ENSG00000158406, ENSG00000184260, ENSG00000276180, ENSG00000180573, ENSG00000275714, ENSG00000277075	191	93	10538	4.74605	0.012442
REACTOME_PATHWAY	R-HSA-212165~Epigenetic regulation of gene expression	R-HSA-212165	Epigenetic regulation of gene expression	10	2.51889	0.00148617	ENSG00000197903, ENSG00000274641, ENSG00000158406, ENSG00000184260, ENSG00000276180, ENSG00000180573, ENSG00000275714, ENSG00000277075, ENSG00000166012, ENSG00000132382	191	149	10538	3.70287	0.0128586
REACTOME_PATHWAY	R-HSA-1592230~Mitochondrial biogenesis	R-HSA-1592230	Mitochondrial biogenesis	8	2.01511	0.00160985	ENSG00000188130, ENSG00000159199, ENSG00000228253, ENSG00000169020, ENSG00000198899, ENSG00000155846, ENSG00000241837, ENSG00000162851	191	95	10538	4.64613	0.0136324
REACTOME_PATHWAY	R-HSA-5625740~RHO GTPases activate PKNs	R-HSA-5625740	RHO GTPases activate PKNs	8	2.01511	0.00160985	ENSG00000197903, ENSG00000274641, ENSG00000158406, ENSG00000184260, ENSG00000276180, ENSG00000180573, ENSG00000275714, ENSG00000277075	191	95	10538	4.64613	0.0136324
REACTOME_PATHWAY	R-HSA-8936459~RUNX1 regulates genes involved in megakaryocyte differentiation and platelet function	R-HSA-8936459	RUNX1 regulates genes involved in megakaryocyte differentiation and platelet function	8	2.01511	0.00181602	ENSG00000197903, ENSG00000274641, ENSG00000158406, ENSG00000184260, ENSG00000276180, ENSG00000180573, ENSG00000275714, ENSG00000277075	191	97	10538	4.55033	0.0152164
REACTOME_PATHWAY	R-HSA-8949613~Cristae formation	R-HSA-8949613	Cristae formation	5	1.25945	0.00220094	ENSG00000159199, ENSG00000228253, ENSG00000169020, ENSG00000198899, ENSG00000241837	191	31	10538	8.89883	0.0182495
REACTOME_PATHWAY	R-HSA-9609646~HCMV Infection	R-HSA-9609646	HCMV Infection	10	2.51889	0.0024246	ENSG00000197903, ENSG00000274641, ENSG00000158406, ENSG00000184260, ENSG00000276180, ENSG00000180573, ENSG00000275714, ENSG00000277075, ENSG00000181218, ENSG00000196747	191	160	10538	3.4483	0.0198967
REACTOME_PATHWAY	R-HSA-1221632~Meiotic synapsis	R-HSA-1221632	Meiotic synapsis	7	1.76322	0.00296558	ENSG00000197903, ENSG00000274641, ENSG00000158406, ENSG00000184260, ENSG00000276180, ENSG00000180573, ENSG00000277075	191	79	10538	4.88873	0.0239528
REACTOME_PATHWAY	R-HSA-2559583~Cellular Senescence	R-HSA-2559583	Cellular Senescence	11	2.77078	0.00300018	ENSG00000197903, ENSG00000274641, ENSG00000158406, ENSG00000184260, ENSG00000276180, ENSG00000180573, ENSG00000275714, ENSG00000277075, ENSG00000143947, ENSG00000187837, ENSG00000136810	191	197	10538	3.08071	0.0239528
REACTOME_PATHWAY	R-HSA-5578749~Transcriptional regulation by small RNAs	R-HSA-5578749	Transcriptional regulation by small RNAs	8	2.01511	0.00300915	ENSG00000197903, ENSG00000274641, ENSG00000158406, ENSG00000184260, ENSG00000276180, ENSG00000180573, ENSG00000275714, ENSG00000277075	191	106	10538	4.16398	0.0239528
REACTOME_PATHWAY	R-HSA-201681~TCF dependent signaling in response to WNT	R-HSA-201681	TCF dependent signaling in response to WNT	12	3.02267	0.00329958	ENSG00000197903, ENSG00000274641, ENSG00000158406, ENSG00000184260, ENSG00000276180, ENSG00000100902, ENSG00000180573, ENSG00000275714, ENSG00000277075, ENSG00000164362, ENSG00000143947, ENSG00000136997	191	233	10538	2.84152	0.0260046
REACTOME_PATHWAY	R-HSA-157118~Signaling by NOTCH	R-HSA-157118	Signaling by NOTCH	12	3.02267	0.00363708	ENSG00000197903, ENSG00000274641, ENSG00000158406, ENSG00000184260, ENSG00000276180, ENSG00000100902, ENSG00000180573, ENSG00000275714, ENSG00000277075, ENSG00000143947, ENSG00000136997, ENSG00000106003	191	236	10538	2.8054	0.0283835
REACTOME_PATHWAY	R-HSA-73886~Chromosome Maintenance	R-HSA-73886	Chromosome Maintenance	9	2.267	0.0039675	ENSG00000197903, ENSG00000274641, ENSG00000158406, ENSG00000184260, ENSG00000276180, ENSG00000180573, ENSG00000277075, ENSG00000164362, ENSG00000142856	191	141	10538	3.52167	0.0306614
REACTOME_PATHWAY	R-HSA-351202~Metabolism of polyamines	R-HSA-351202	Metabolism of polyamines	6	1.51134	0.00411611	ENSG00000116771, ENSG00000100902, ENSG00000115758, ENSG00000116649, ENSG00000130066, ENSG00000181019	191	59	10538	5.61079	0.031504
REACTOME_PATHWAY	R-HSA-157579~Telomere Maintenance	R-HSA-157579	Telomere Maintenance	8	2.01511	0.00429332	ENSG00000197903, ENSG00000274641, ENSG00000158406, ENSG00000184260, ENSG00000276180, ENSG00000180573, ENSG00000277075, ENSG00000164362	191	113	10538	3.90604	0.0324442
REACTOME_PATHWAY	R-HSA-1474165~Reproduction	R-HSA-1474165	Reproduction	9	2.267	0.00432046	ENSG00000197903, ENSG00000274641, ENSG00000158406, ENSG00000184260, ENSG00000276180, ENSG00000180573, ENSG00000275714, ENSG00000277075, ENSG00000121211	191	143	10538	3.47241	0.0324442
REACTOME_PATHWAY	R-HSA-5628897~TP53 Regulates Metabolic Genes	R-HSA-5628897	TP53 Regulates Metabolic Genes	7	1.76322	0.00478729	ENSG00000198938, ENSG00000176153, ENSG00000189043, ENSG00000198712, ENSG00000131174, ENSG00000136810, ENSG00000198804	191	87	10538	4.43919	0.0356138
REACTOME_PATHWAY	R-HSA-9018519~Estrogen-dependent gene expression	R-HSA-9018519	Estrogen-dependent gene expression	9	2.267	0.00574939	ENSG00000197903, ENSG00000274641, ENSG00000158406, ENSG00000184260, ENSG00000276180, ENSG00000180573, ENSG00000275714, ENSG00000277075, ENSG00000136997	191	150	10538	3.31037	0.0423751
REACTOME_PATHWAY	R-HSA-1268020~Mitochondrial protein import	R-HSA-1268020	Mitochondrial protein import	6	1.51134	0.00583245	ENSG00000217930, ENSG00000036473, ENSG00000159199, ENSG00000168275, ENSG00000126953, ENSG00000175768	191	64	10538	5.17245	0.0425929
REACTOME_PATHWAY	R-HSA-5619507~Activation of HOX genes during differentiation	R-HSA-5619507	Activation of HOX genes during differentiation	8	2.01511	0.00622675	ENSG00000197903, ENSG00000274641, ENSG00000158406, ENSG00000184260, ENSG00000276180, ENSG00000180573, ENSG00000275714, ENSG00000277075	191	121	10538	3.64779	0.0446315
REACTOME_PATHWAY	R-HSA-5617472~Activation of anterior HOX genes in hindbrain development during early embryogenesis	R-HSA-5617472	Activation of anterior HOX genes in hindbrain development during early embryogenesis	8	2.01511	0.00622675	ENSG00000197903, ENSG00000274641, ENSG00000158406, ENSG00000184260, ENSG00000276180, ENSG00000180573, ENSG00000275714, ENSG00000277075	191	121	10538	3.64779	0.0446315
REACTOME_PATHWAY	R-HSA-73884~Base Excision Repair	R-HSA-73884	Base Excision Repair	7	1.76322	0.00627981	ENSG00000197903, ENSG00000274641, ENSG00000158406, ENSG00000184260, ENSG00000276180, ENSG00000180573, ENSG00000277075	191	92	10538	4.19793	0.0446315
REACTOME_PATHWAY	R-HSA-5689880~Ub-specific processing proteases	R-HSA-5689880	Ub-specific processing proteases	11	2.77078	0.00652373	ENSG00000197903, ENSG00000274641, ENSG00000184260, ENSG00000100902, ENSG00000180573, ENSG00000277075, ENSG00000143947, ENSG00000136997, ENSG00000181218, ENSG00000141378, ENSG00000196747	191	220	10538	2.75864	0.0459548
REACTOME_PATHWAY	R-HSA-69306~DNA Replication	R-HSA-69306	DNA Replication	10	2.51889	0.00746514	ENSG00000197903, ENSG00000274641, ENSG00000158406, ENSG00000184260, ENSG00000276180, ENSG00000100902, ENSG00000180573, ENSG00000275714, ENSG00000277075, ENSG00000143947	191	190	10538	2.90383	0.052125
REACTOME_PATHWAY	R-HSA-9711123~Cellular response to chemical stress	R-HSA-9711123	Cellular response to chemical stress	9	2.267	0.00838284	ENSG00000198938, ENSG00000176153, ENSG00000100902, ENSG00000189043, ENSG00000143947, ENSG00000198712, ENSG00000131174, ENSG00000136810, ENSG00000198804	191	160	10538	3.10347	0.0580238
REACTOME_PATHWAY	R-HSA-5689603~UCH proteinases	R-HSA-5689603	UCH proteinases	7	1.76322	0.0102378	ENSG00000184260, ENSG00000100902, ENSG00000180573, ENSG00000277075, ENSG00000143947, ENSG00000181218, ENSG00000196747	191	102	10538	3.78637	0.0702524
REACTOME_PATHWAY	R-HSA-3247509~Chromatin modifying enzymes	R-HSA-3247509	Chromatin modifying enzymes	12	3.02267	0.0108056	ENSG00000197903, ENSG00000274641, ENSG00000158406, ENSG00000184260, ENSG00000276180, ENSG00000180573, ENSG00000275714, ENSG00000277075, ENSG00000103037, ENSG00000185238, ENSG00000181218, ENSG00000196747	191	274	10538	2.41633	0.0728923
REACTOME_PATHWAY	R-HSA-4839726~Chromatin organization	R-HSA-4839726	Chromatin organization	12	3.02267	0.0108056	ENSG00000197903, ENSG00000274641, ENSG00000158406, ENSG00000184260, ENSG00000276180, ENSG00000180573, ENSG00000275714, ENSG00000277075, ENSG00000103037, ENSG00000185238, ENSG00000181218, ENSG00000196747	191	274	10538	2.41633	0.0728923
REACTOME_PATHWAY	R-HSA-211000~Gene Silencing by RNA	R-HSA-211000	Gene Silencing by RNA	8	2.01511	0.0123981	ENSG00000197903, ENSG00000274641, ENSG00000158406, ENSG00000184260, ENSG00000276180, ENSG00000180573, ENSG00000275714, ENSG00000277075	191	138	10538	3.19842	0.0829319
REACTOME_PATHWAY	R-HSA-68875~Mitotic Prophase	R-HSA-68875	Mitotic Prophase	8	2.01511	0.0143317	ENSG00000197903, ENSG00000274641, ENSG00000158406, ENSG00000184260, ENSG00000276180, ENSG00000180573, ENSG00000275714, ENSG00000277075	191	142	10538	3.10833	0.0950667
REACTOME_PATHWAY	R-HSA-499943~Interconversion of nucleotide di- and triphosphates	R-HSA-499943	Interconversion of nucleotide di- and triphosphates	4	1.00756	0.016381	ENSG00000243678, ENSG00000239672, ENSG00000136810, ENSG00000106992	191	30	10538	7.35637	0.107763
REACTOME_PATHWAY	R-HSA-195721~Signaling by WNT	R-HSA-195721	Signaling by WNT	13	3.27456	0.0170858	ENSG00000158406, ENSG00000276180, ENSG00000180573, ENSG00000277075, ENSG00000136997, ENSG00000197903, ENSG00000274641, ENSG00000184260, ENSG00000100902, ENSG00000185483, ENSG00000275714, ENSG00000164362, ENSG00000143947	191	332	10538	2.16038	0.111478
REACTOME_PATHWAY	R-HSA-5688426~Deubiquitination	R-HSA-5688426	Deubiquitination	12	3.02267	0.0188325	ENSG00000197903, ENSG00000274641, ENSG00000184260, ENSG00000100902, ENSG00000180573, ENSG00000277075, ENSG00000143947, ENSG00000136997, ENSG00000181218, ENSG00000141378, ENSG00000180667, ENSG00000196747	191	298	10538	2.22172	0.121876
REACTOME_PATHWAY	R-HSA-8939211~ESR-mediated signaling	R-HSA-8939211	ESR-mediated signaling	10	2.51889	0.0195938	ENSG00000197903, ENSG00000274641, ENSG00000158406, ENSG00000184260, ENSG00000276180, ENSG00000180573, ENSG00000275714, ENSG00000277075, ENSG00000136997, ENSG00000176170	191	223	10538	2.47412	0.125307
REACTOME_PATHWAY	R-HSA-9006931~Signaling by Nuclear Receptors	R-HSA-9006931	Signaling by Nuclear Receptors	12	3.02267	0.0196776	ENSG00000197903, ENSG00000274641, ENSG00000158406, ENSG00000169710, ENSG00000184260, ENSG00000276180, ENSG00000180573, ENSG00000275714, ENSG00000277075, ENSG00000136997, ENSG00000164687, ENSG00000176170	191	299	10538	2.21429	0.125307
REACTOME_PATHWAY	R-HSA-5419276~Mitochondrial translation termination	R-HSA-5419276	Mitochondrial translation termination	6	1.51134	0.0203275	ENSG00000204316, ENSG00000163319, ENSG00000198015, ENSG00000106591, ENSG00000171421, ENSG00000136522	191	87	10538	3.80502	0.126412
REACTOME_PATHWAY	R-HSA-5389840~Mitochondrial translation elongation	R-HSA-5389840	Mitochondrial translation elongation	6	1.51134	0.0203275	ENSG00000204316, ENSG00000163319, ENSG00000198015, ENSG00000106591, ENSG00000171421, ENSG00000136522	191	87	10538	3.80502	0.126412
REACTOME_PATHWAY	R-HSA-5368286~Mitochondrial translation initiation	R-HSA-5368286	Mitochondrial translation initiation	6	1.51134	0.0203275	ENSG00000204316, ENSG00000163319, ENSG00000198015, ENSG00000106591, ENSG00000171421, ENSG00000136522	191	87	10538	3.80502	0.126412
REACTOME_PATHWAY	R-HSA-9707564~Cytoprotection by HMOX1	R-HSA-9707564	Cytoprotection by HMOX1	7	1.76322	0.024617	ENSG00000198938, ENSG00000100902, ENSG00000189043, ENSG00000143947, ENSG00000198712, ENSG00000131174, ENSG00000198804	191	124	10538	3.11459	0.1519
REACTOME_PATHWAY	R-HSA-5368287~Mitochondrial translation	R-HSA-5368287	Mitochondrial translation	6	1.51134	0.026251	ENSG00000204316, ENSG00000163319, ENSG00000198015, ENSG00000106591, ENSG00000171421, ENSG00000136522	191	93	10538	3.55953	0.160737
REACTOME_PATHWAY	R-HSA-8878171~Transcriptional regulation by RUNX1	R-HSA-8878171	Transcriptional regulation by RUNX1	10	2.51889	0.0290562	ENSG00000197903, ENSG00000274641, ENSG00000158406, ENSG00000184260, ENSG00000276180, ENSG00000100902, ENSG00000180573, ENSG00000275714, ENSG00000277075, ENSG00000143947	191	239	10538	2.30848	0.176555
REACTOME_PATHWAY	R-HSA-74160~Gene expression (Transcription)	R-HSA-74160	Gene expression (Transcription)	37	9.3199	0.0427406	ENSG00000153234, ENSG00000158406, ENSG00000176153, ENSG00000276180, ENSG00000180573, ENSG00000277075, ENSG00000113356, ENSG00000136997, ENSG00000136810, ENSG00000198804, ENSG00000274641, ENSG00000198938, ENSG00000197903, ENSG00000184260, ENSG00000100902, ENSG00000143977, ENSG00000275714, ENSG00000166012, ENSG00000182004, ENSG00000018869, ENSG00000162851, ENSG00000102760, ENSG00000275895, ENSG0000…	191	1502	10538	1.35912	0.257739
