# Supplementary material for: Culture of Cancer Cells at Physiological Oxygen Levels Affects Gene Expression in a Cell-Type Specific Manner
Source: Preprints.org preprint supplement (doi:10.20944/preprints202208.0497.v1), 2022-08-29
Supplement: Supplementary file 13 [file Table S9 Functional Enrichent PC-3 5% O2.xlsx]

## Sheet: GO
Category	Term	ID	Name	Count	%	PValue	Genes	List Total	Pop Hits	Pop Total	Fold Enrichment	Benjamini padj
GO TERM: CC	GO:0098803~respiratory chain complex	GO:0098803	respiratory chain complex	7	3.74332	2.31823e-06	ENSG00000212907, ENSG00000198695, ENSG00000198763, ENSG00000198886, ENSG00000198786, ENSG00000198712, ENSG00000198727	73	92	17223	17.9513	0.00023598
GO TERM: CC	GO:0098800~inner mitochondrial membrane protein complex	GO:0098800	inner mitochondrial membrane protein complex	8	4.27807	2.8984e-06	ENSG00000212907, ENSG00000198695, ENSG00000198763, ENSG00000198886, ENSG00000228253, ENSG00000198786, ENSG00000198712, ENSG00000198727	73	149	17223	12.6675	0.00023598
GO TERM: CC	GO:0005746~mitochondrial respiratory chain	GO:0005746	mitochondrial respiratory chain	7	3.74332	2.97454e-06	ENSG00000212907, ENSG00000198695, ENSG00000198763, ENSG00000198886, ENSG00000198786, ENSG00000198712, ENSG00000198727	73	96	17223	17.2033	0.00023598
GO TERM: CC	GO:0070469~respiratory chain	GO:0070469	respiratory chain	7	3.74332	4.74242e-06	ENSG00000212907, ENSG00000198695, ENSG00000198763, ENSG00000198886, ENSG00000198786, ENSG00000198712, ENSG00000198727	73	104	17223	15.88	0.000282174
GO TERM: CC	GO:0098798~mitochondrial protein complex	GO:0098798	mitochondrial protein complex	8	4.27807	1.2039e-05	ENSG00000212907, ENSG00000198695, ENSG00000198763, ENSG00000198886, ENSG00000228253, ENSG00000198786, ENSG00000198712, ENSG00000198727	73	185	17223	10.2024	0.000494951
GO TERM: CC	GO:1990204~oxidoreductase complex	GO:1990204	oxidoreductase complex	7	3.74332	1.24777e-05	ENSG00000212907, ENSG00000198695, ENSG00000198763, ENSG00000198886, ENSG00000198786, ENSG00000152256, ENSG00000198727	73	123	17223	13.427	0.000494951
GO TERM: CC	GO:0044455~mitochondrial membrane part	GO:0044455	mitochondrial membrane part	9	4.81283	1.60945e-05	ENSG00000212907, ENSG00000198695, ENSG00000198763, ENSG00000198886, ENSG00000228253, ENSG00000198786, ENSG00000198712, ENSG00000176171, ENSG00000198727	73	269	17223	7.89362	0.000547214
GO TERM: CC	GO:0005747~mitochondrial respiratory chain complex I	GO:0005747	mitochondrial respiratory chain complex I	5	2.6738	5.59055e-05	ENSG00000212907, ENSG00000198695, ENSG00000198763, ENSG00000198886, ENSG00000198786	73	50	17223	23.5932	0.00133055
GO TERM: CC	GO:0045271~respiratory chain complex I	GO:0045271	respiratory chain complex I	5	2.6738	5.59055e-05	ENSG00000212907, ENSG00000198695, ENSG00000198763, ENSG00000198886, ENSG00000198786	73	50	17223	23.5932	0.00133055
GO TERM: CC	GO:0030964~NADH dehydrogenase complex	GO:0030964	NADH dehydrogenase complex	5	2.6738	5.59055e-05	ENSG00000212907, ENSG00000198695, ENSG00000198763, ENSG00000198886, ENSG00000198786	73	50	17223	23.5932	0.00133055
GO TERM: MF	GO:0008137~NADH dehydrogenase (ubiquinone) activity	GO:0008137	NADH dehydrogenase (ubiquinone) activity	5	2.6738	4.72907e-05	ENSG00000212907, ENSG00000198695, ENSG00000198763, ENSG00000198886, ENSG00000198786	74	46	16739	24.5873	0.00603927
GO TERM: MF	GO:0050136~NADH dehydrogenase (quinone) activity	GO:0050136	NADH dehydrogenase (quinone) activity	5	2.6738	5.152e-05	ENSG00000212907, ENSG00000198695, ENSG00000198763, ENSG00000198886, ENSG00000198786	74	47	16739	24.0641	0.00603927
GO TERM: MF	GO:0003954~NADH dehydrogenase activity	GO:0003954	NADH dehydrogenase activity	5	2.6738	6.07981e-05	ENSG00000212907, ENSG00000198695, ENSG00000198763, ENSG00000198886, ENSG00000198786	74	49	16739	23.0819	0.00603927
GO TERM: BP	GO:0042773~ATP synthesis coupled electron transport	GO:0042773	ATP synthesis coupled electron transport	7	3.74332	7.55841e-06	ENSG00000212907, ENSG00000198695, ENSG00000198763, ENSG00000198886, ENSG00000198786, ENSG00000198712, ENSG00000198727	88	104	19277	14.7442	0.00736567
GO TERM: BP	GO:0042775~mitochondrial ATP synthesis coupled electron transport	GO:0042775	mitochondrial ATP synthesis coupled electron transport	7	3.74332	7.55841e-06	ENSG00000212907, ENSG00000198695, ENSG00000198763, ENSG00000198886, ENSG00000198786, ENSG00000198712, ENSG00000198727	88	104	19277	14.7442	0.00736567
GO TERM: MF	GO:0016655~oxidoreductase activity, acting on NAD(P)H, quinone or similar compound as acceptor	GO:0016655	oxidoreductase activity, acting on NAD(P)H, quinone or similar compound as acceptor	5	2.6738	0.000153375	ENSG00000212907, ENSG00000198695, ENSG00000198763, ENSG00000198886, ENSG00000198786	74	62	16739	18.2422	0.0114265
GO TERM: BP	GO:0022904~respiratory electron transport chain	GO:0022904	respiratory electron transport chain	7	3.74332	2.16655e-05	ENSG00000212907, ENSG00000198695, ENSG00000198763, ENSG00000198886, ENSG00000198786, ENSG00000198712, ENSG00000198727	88	125	19277	12.2672	0.0115506
GO TERM: BP	GO:0006119~oxidative phosphorylation	GO:0006119	oxidative phosphorylation	7	3.74332	2.37058e-05	ENSG00000212907, ENSG00000198695, ENSG00000198763, ENSG00000198886, ENSG00000198786, ENSG00000198712, ENSG00000198727	88	127	19277	12.074	0.0115506
GO TERM: BP	GO:0045333~cellular respiration	GO:0045333	cellular respiration	8	4.27807	3.37573e-05	ENSG00000212907, ENSG00000198695, ENSG00000198763, ENSG00000198886, ENSG00000198786, ENSG00000198712, ENSG00000176171, ENSG00000198727	88	200	19277	8.76227	0.0131586
GO TERM: CC	GO:0005730~nucleolus	GO:0005730	nucleolus	16	8.55615	0.000827452	ENSG00000107159, ENSG00000212443, ENSG00000209482, ENSG00000158806, ENSG00000252906, ENSG00000199787, ENSG00000116741, ENSG00000149927, ENSG00000221164, ENSG00000252835, ENSG00000201512, ENSG00000124614, ENSG00000251898, ENSG00000128886, ENSG00000206838, ENSG00000200913	73	1450	17223	2.60338	0.017903
GO TERM: BP	GO:0006120~mitochondrial electron transport, NADH to ubiquinone	GO:0006120	mitochondrial electron transport, NADH to ubiquinone	5	2.6738	0.000118842	ENSG00000212907, ENSG00000198695, ENSG00000198763, ENSG00000198886, ENSG00000198786	88	56	19277	19.5586	0.0386037
GO TERM: BP	GO:0022900~electron transport chain	GO:0022900	electron transport chain	7	3.74332	0.000164628	ENSG00000212907, ENSG00000198695, ENSG00000198763, ENSG00000198886, ENSG00000198786, ENSG00000198712, ENSG00000198727	88	180	19277	8.51888	0.0432211
GO TERM: BP	GO:0015990~electron transport coupled proton transport	GO:0015990	electron transport coupled proton transport	3	1.60428	0.000199584	ENSG00000198886, ENSG00000198786, ENSG00000198727	88	5	19277	131.434	0.0432211
GO TERM: BP	GO:0015988~energy coupled proton transmembrane transport, against electrochemical gradient	GO:0015988	energy coupled proton transmembrane transport, against electrochemical gradient	3	1.60428	0.000199584	ENSG00000198886, ENSG00000198786, ENSG00000198727	88	5	19277	131.434	0.0432211
GO TERM: CC	GO:0000786~nucleosome	GO:0000786	nucleosome	5	2.6738	0.00239452	ENSG00000274750, ENSG00000276966, ENSG00000277075, ENSG00000276903, ENSG00000273802	73	134	17223	8.80341	0.0474913
GO TERM: CC	GO:0044815~DNA packaging complex	GO:0044815	DNA packaging complex	5	2.6738	0.00295262	ENSG00000274750, ENSG00000276966, ENSG00000277075, ENSG00000276903, ENSG00000273802	73	142	17223	8.30745	0.0540557
GO TERM: BP	GO:0015980~energy derivation by oxidation of organic compounds	GO:0015980	energy derivation by oxidation of organic compounds	8	4.27807	0.000376155	ENSG00000212907, ENSG00000198695, ENSG00000198763, ENSG00000198886, ENSG00000198786, ENSG00000198712, ENSG00000176171, ENSG00000198727	88	295	19277	5.94052	0.0733126
GO TERM: MF	GO:0016651~oxidoreductase activity, acting on NAD(P)H	GO:0016651	oxidoreductase activity, acting on NAD(P)H	5	2.6738	0.00131112	ENSG00000212907, ENSG00000198695, ENSG00000198763, ENSG00000198886, ENSG00000198786	74	109	16739	10.3763	0.0781428
GO TERM: CC	GO:0005743~mitochondrial inner membrane	GO:0005743	mitochondrial inner membrane	8	4.27807	0.00553779	ENSG00000212907, ENSG00000198695, ENSG00000198763, ENSG00000198886, ENSG00000228253, ENSG00000198786, ENSG00000198712, ENSG00000198727	73	513	17223	3.67924	0.0941425
GO TERM: BP	GO:0046034~ATP metabolic process	GO:0046034	ATP metabolic process	8	4.27807	0.000693807	ENSG00000212907, ENSG00000198695, ENSG00000198763, ENSG00000198886, ENSG00000228253, ENSG00000198786, ENSG00000198712, ENSG00000198727	88	327	19277	5.35919	0.12293
GO TERM: CC	GO:0019866~organelle inner membrane	GO:0019866	organelle inner membrane	8	4.27807	0.0100847	ENSG00000212907, ENSG00000198695, ENSG00000198763, ENSG00000198886, ENSG00000228253, ENSG00000198786, ENSG00000198712, ENSG00000198727	73	575	17223	3.28253	0.160011
GO TERM: BP	GO:0009205~purine ribonucleoside triphosphate metabolic process	GO:0009205	purine ribonucleoside triphosphate metabolic process	8	4.27807	0.0011759	ENSG00000212907, ENSG00000198695, ENSG00000198763, ENSG00000198886, ENSG00000228253, ENSG00000198786, ENSG00000198712, ENSG00000198727	88	358	19277	4.89512	0.175797
GO TERM: BP	GO:0009144~purine nucleoside triphosphate metabolic process	GO:0009144	purine nucleoside triphosphate metabolic process	8	4.27807	0.00127364	ENSG00000212907, ENSG00000198695, ENSG00000198763, ENSG00000198886, ENSG00000228253, ENSG00000198786, ENSG00000198712, ENSG00000198727	88	363	19277	4.8277	0.175797
GO TERM: BP	GO:0009199~ribonucleoside triphosphate metabolic process	GO:0009199	ribonucleoside triphosphate metabolic process	8	4.27807	0.00131448	ENSG00000212907, ENSG00000198695, ENSG00000198763, ENSG00000198886, ENSG00000228253, ENSG00000198786, ENSG00000198712, ENSG00000198727	88	365	19277	4.80125	0.175797
GO TERM: BP	GO:0009167~purine ribonucleoside monophosphate metabolic process	GO:0009167	purine ribonucleoside monophosphate metabolic process	8	4.27807	0.00144318	ENSG00000212907, ENSG00000198695, ENSG00000198763, ENSG00000198886, ENSG00000228253, ENSG00000198786, ENSG00000198712, ENSG00000198727	88	371	19277	4.7236	0.175797
GO TERM: BP	GO:0009126~purine nucleoside monophosphate metabolic process	GO:0009126	purine nucleoside monophosphate metabolic process	8	4.27807	0.00144318	ENSG00000212907, ENSG00000198695, ENSG00000198763, ENSG00000198886, ENSG00000228253, ENSG00000198786, ENSG00000198712, ENSG00000198727	88	371	19277	4.7236	0.175797
GO TERM: BP	GO:0009141~nucleoside triphosphate metabolic process	GO:0009141	nucleoside triphosphate metabolic process	8	4.27807	0.00173004	ENSG00000212907, ENSG00000198695, ENSG00000198763, ENSG00000198886, ENSG00000228253, ENSG00000198786, ENSG00000198712, ENSG00000198727	88	383	19277	4.5756	0.198344
GO TERM: BP	GO:0009161~ribonucleoside monophosphate metabolic process	GO:0009161	ribonucleoside monophosphate metabolic process	8	4.27807	0.00186191	ENSG00000212907, ENSG00000198695, ENSG00000198763, ENSG00000198886, ENSG00000228253, ENSG00000198786, ENSG00000198712, ENSG00000198727	88	388	19277	4.51664	0.201604
GO TERM: CC	GO:0031966~mitochondrial membrane	GO:0031966	mitochondrial membrane	9	4.81283	0.0156399	ENSG00000212907, ENSG00000198695, ENSG00000198763, ENSG00000198886, ENSG00000228253, ENSG00000198786, ENSG00000198712, ENSG00000176171, ENSG00000198727	73	778	17223	2.72928	0.232643
GO TERM: CC	GO:0032993~protein-DNA complex	GO:0032993	protein-DNA complex	5	2.6738	0.0166345	ENSG00000274750, ENSG00000276966, ENSG00000277075, ENSG00000276903, ENSG00000273802	73	234	17223	5.04127	0.232883
GO TERM: BP	GO:0009123~nucleoside monophosphate metabolic process	GO:0009123	nucleoside monophosphate metabolic process	8	4.27807	0.00233709	ENSG00000212907, ENSG00000198695, ENSG00000198763, ENSG00000198886, ENSG00000228253, ENSG00000198786, ENSG00000198712, ENSG00000198727	88	404	19277	4.33776	0.239736
GO TERM: CC	GO:0005740~mitochondrial envelope	GO:0005740	mitochondrial envelope	9	4.81283	0.022155	ENSG00000212907, ENSG00000198695, ENSG00000198763, ENSG00000198886, ENSG00000228253, ENSG00000198786, ENSG00000198712, ENSG00000176171, ENSG00000198727	73	830	17223	2.55829	0.292939
GO TERM: BP	GO:0009150~purine ribonucleotide metabolic process	GO:0009150	purine ribonucleotide metabolic process	9	4.81283	0.00357624	ENSG00000212907, ENSG00000198695, ENSG00000138271, ENSG00000198763, ENSG00000198886, ENSG00000228253, ENSG00000198786, ENSG00000198712, ENSG00000198727	88	555	19277	3.55227	0.317991
GO TERM: BP	GO:0010257~NADH dehydrogenase complex assembly	GO:0010257	NADH dehydrogenase complex assembly	4	2.13904	0.00390837	ENSG00000198695, ENSG00000198763, ENSG00000198886, ENSG00000198786	88	70	19277	12.5175	0.317991
GO TERM: BP	GO:0097031~mitochondrial respiratory chain complex I biogenesis	GO:0097031	mitochondrial respiratory chain complex I biogenesis	4	2.13904	0.00390837	ENSG00000198695, ENSG00000198763, ENSG00000198886, ENSG00000198786	88	70	19277	12.5175	0.317991
GO TERM: BP	GO:0032981~mitochondrial respiratory chain complex I assembly	GO:0032981	mitochondrial respiratory chain complex I assembly	4	2.13904	0.00390837	ENSG00000198695, ENSG00000198763, ENSG00000198886, ENSG00000198786	88	70	19277	12.5175	0.317991
GO TERM: BP	GO:1902600~hydrogen ion transmembrane transport	GO:1902600	hydrogen ion transmembrane transport	5	2.6738	0.00391574	ENSG00000198886, ENSG00000228253, ENSG00000198786, ENSG00000198712, ENSG00000198727	88	142	19277	7.71327	0.317991
GO TERM: BP	GO:0006163~purine nucleotide metabolic process	GO:0006163	purine nucleotide metabolic process	9	4.81283	0.00424195	ENSG00000212907, ENSG00000198695, ENSG00000138271, ENSG00000198763, ENSG00000198886, ENSG00000228253, ENSG00000198786, ENSG00000198712, ENSG00000198727	88	571	19277	3.45273	0.324694
GO TERM: BP	GO:0009259~ribonucleotide metabolic process	GO:0009259	ribonucleotide metabolic process	9	4.81283	0.00433147	ENSG00000212907, ENSG00000198695, ENSG00000138271, ENSG00000198763, ENSG00000198886, ENSG00000228253, ENSG00000198786, ENSG00000198712, ENSG00000198727	88	573	19277	3.44068	0.324694
GO TERM: BP	GO:0019693~ribose phosphate metabolic process	GO:0019693	ribose phosphate metabolic process	9	4.81283	0.00525676	ENSG00000212907, ENSG00000198695, ENSG00000138271, ENSG00000198763, ENSG00000198886, ENSG00000228253, ENSG00000198786, ENSG00000198712, ENSG00000198727	88	592	19277	3.33026	0.37946
GO TERM: BP	GO:0015992~proton transport	GO:0015992	proton transport	5	2.6738	0.0062307	ENSG00000198886, ENSG00000228253, ENSG00000198786, ENSG00000198712, ENSG00000198727	88	162	19277	6.76101	0.418746
GO TERM: BP	GO:0006818~hydrogen transport	GO:0006818	hydrogen transport	5	2.6738	0.0062307	ENSG00000198886, ENSG00000228253, ENSG00000198786, ENSG00000198712, ENSG00000198727	88	162	19277	6.76101	0.418746
GO TERM: BP	GO:0072521~purine-containing compound metabolic process	GO:0072521	purine-containing compound metabolic process	9	4.81283	0.00651004	ENSG00000212907, ENSG00000198695, ENSG00000138271, ENSG00000198763, ENSG00000198886, ENSG00000228253, ENSG00000198786, ENSG00000198712, ENSG00000198727	88	614	19277	3.21093	0.422935
GO TERM: BP	GO:0006091~generation of precursor metabolites and energy	GO:0006091	generation of precursor metabolites and energy	8	4.27807	0.00735326	ENSG00000212907, ENSG00000198695, ENSG00000198763, ENSG00000198886, ENSG00000198786, ENSG00000198712, ENSG00000176171, ENSG00000198727	88	499	19277	3.51193	0.454474
GO TERM: BP	GO:0001666~response to hypoxia	GO:0001666	response to hypoxia	7	3.74332	0.00746186	ENSG00000107159, ENSG00000180176, ENSG00000198886, ENSG00000198786, ENSG00000176171, ENSG00000152256, ENSG00000198727	88	380	19277	4.03526	0.454474
GO TERM: BP	GO:0036293~response to decreased oxygen levels	GO:0036293	response to decreased oxygen levels	7	3.74332	0.00893851	ENSG00000107159, ENSG00000180176, ENSG00000198886, ENSG00000198786, ENSG00000176171, ENSG00000152256, ENSG00000198727	88	395	19277	3.88202	0.527914
GO TERM: CC	GO:0015030~Cajal body	GO:0015030	Cajal body	3	1.60428	0.0431908	ENSG00000252835, ENSG00000251898, ENSG00000252906	73	79	17223	8.95942	0.541022
GO TERM: CC	GO:0044429~mitochondrial part	GO:0044429	mitochondrial part	10	5.34759	0.0477928	ENSG00000212907, ENSG00000198695, ENSG00000198763, ENSG00000198886, ENSG00000228253, ENSG00000198786, ENSG00000198712, ENSG00000176171, ENSG00000152256, ENSG00000198727	73	1142	17223	2.06595	0.568734
GO TERM: BP	GO:0055114~oxidation-reduction process	GO:0055114	oxidation-reduction process	8	4.27807	0.010056	ENSG00000212907, ENSG00000198695, ENSG00000198763, ENSG00000198886, ENSG00000198786, ENSG00000198712, ENSG00000176171, ENSG00000198727	88	530	19277	3.30652	0.576444
GO TERM: CC	GO:0005739~mitochondrion	GO:0005739	mitochondrion	13	6.95187	0.057906	ENSG00000198695, ENSG00000180176, ENSG00000198763, ENSG00000198886, ENSG00000228253, ENSG00000198786, ENSG00000198712, ENSG00000115841, ENSG00000152256, ENSG00000198727, ENSG00000116741, ENSG00000212907, ENSG00000176171	73	1749	17223	1.75364	0.656268
GO TERM: BP	GO:0070482~response to oxygen levels	GO:0070482	response to oxygen levels	7	3.74332	0.0119778	ENSG00000107159, ENSG00000180176, ENSG00000198886, ENSG00000198786, ENSG00000176171, ENSG00000152256, ENSG00000198727	88	421	19277	3.64227	0.662601
GO TERM: BP	GO:0010467~gene expression	GO:0010467	gene expression	43	22.9947	0.0124219	ENSG00000107159, ENSG00000209482, ENSG00000277075, ENSG00000252906, ENSG00000116741, ENSG00000178977, ENSG00000188243, ENSG00000197928, ENSG00000253522, ENSG00000276966, ENSG00000252835, ENSG00000124614, ENSG00000276903, ENSG00000183850, ENSG00000256771, ENSG00000206838, ENSG00000200913, ENSG00000105750, ENSG00000212443, ENSG00000196172, ENSG00000197124, ENSG00000199787, ENSG00000111863, ENSG0000…	88	6942	19277	1.35688	0.662601
GO TERM: BP	GO:0033108~mitochondrial respiratory chain complex assembly	GO:0033108	mitochondrial respiratory chain complex assembly	4	2.13904	0.0125789	ENSG00000198695, ENSG00000198763, ENSG00000198886, ENSG00000198786	88	107	19277	8.18904	0.662601
GO TERM: BP	GO:0038172~interleukin-33-mediated signaling pathway	GO:0038172	interleukin-33-mediated signaling pathway	2	1.06952	0.0134791	ENSG00000137033, ENSG00000115602	88	3	19277	146.038	0.691338
GO TERM: MF	GO:0000987~core promoter proximal region sequence-specific DNA binding	GO:0000987	core promoter proximal region sequence-specific DNA binding	12	6.41711	0.0165233	ENSG00000196172, ENSG00000197928, ENSG00000256229, ENSG00000180818, ENSG00000197124, ENSG00000183850, ENSG00000159885, ENSG00000170166, ENSG00000128886, ENSG00000256771, ENSG00000196437, ENSG00000105750	74	1224	16739	2.21767	0.703419
GO TERM: MF	GO:0001159~core promoter proximal region DNA binding	GO:0001159	core promoter proximal region DNA binding	12	6.41711	0.0165233	ENSG00000196172, ENSG00000197928, ENSG00000256229, ENSG00000180818, ENSG00000197124, ENSG00000183850, ENSG00000159885, ENSG00000170166, ENSG00000128886, ENSG00000256771, ENSG00000196437, ENSG00000105750	74	1224	16739	2.21767	0.703419
GO TERM: CC	GO:0045095~keratin filament	GO:0045095	keratin filament	3	1.60428	0.0714653	ENSG00000212722, ENSG00000221852, ENSG00000241241	73	105	17223	6.7409	0.720621
GO TERM: CC	GO:0043505~CENP-A containing nucleosome	GO:0043505	CENP-A containing nucleosome	2	1.06952	0.0726677	ENSG00000276966, ENSG00000277075	73	18	17223	26.2146	0.720621
GO TERM: CC	GO:0061638~CENP-A containing chromatin	GO:0061638	CENP-A containing chromatin	2	1.06952	0.0726677	ENSG00000276966, ENSG00000277075	73	18	17223	26.2146	0.720621
GO TERM: BP	GO:0009117~nucleotide metabolic process	GO:0009117	nucleotide metabolic process	9	4.81283	0.014566	ENSG00000212907, ENSG00000198695, ENSG00000138271, ENSG00000198763, ENSG00000198886, ENSG00000228253, ENSG00000198786, ENSG00000198712, ENSG00000198727	88	708	19277	2.78462	0.727927
GO TERM: CC	GO:0034506~chromosome, centromeric core domain	GO:0034506	chromosome, centromeric core domain	2	1.06952	0.0765484	ENSG00000276966, ENSG00000277075	73	19	17223	24.8349	0.728741
GO TERM: BP	GO:0006753~nucleoside phosphate metabolic process	GO:0006753	nucleoside phosphate metabolic process	9	4.81283	0.0157257	ENSG00000212907, ENSG00000198695, ENSG00000138271, ENSG00000198763, ENSG00000198886, ENSG00000228253, ENSG00000198786, ENSG00000198712, ENSG00000198727	88	718	19277	2.74584	0.75776
GO TERM: BP	GO:0034622~cellular macromolecular complex assembly	GO:0034622	cellular macromolecular complex assembly	13	6.95187	0.0160023	ENSG00000198695, ENSG00000198763, ENSG00000198886, ENSG00000198786, ENSG00000229388, ENSG00000150773, ENSG00000274750, ENSG00000100505, ENSG00000276966, ENSG00000124614, ENSG00000158164, ENSG00000147003, ENSG00000273802	88	1329	19277	2.14277	0.75776
GO TERM: BP	GO:0032609~interferon-gamma production	GO:0032609	interferon-gamma production	4	2.13904	0.0163294	ENSG00000137033, ENSG00000115602, ENSG00000008438, ENSG00000221887	88	118	19277	7.42565	0.75776
GO TERM: BP	GO:0032689~negative regulation of interferon-gamma production	GO:0032689	negative regulation of interferon-gamma production	3	1.60428	0.0175792	ENSG00000137033, ENSG00000115602, ENSG00000008438	88	45	19277	14.6038	0.78989
GO TERM: BP	GO:0032649~regulation of interferon-gamma production	GO:0032649	regulation of interferon-gamma production	4	2.13904	0.0178323	ENSG00000137033, ENSG00000115602, ENSG00000008438, ENSG00000221887	88	122	19277	7.18219	0.78989
GO TERM: BP	GO:0050873~brown fat cell differentiation	GO:0050873	brown fat cell differentiation	3	1.60428	0.018325	ENSG00000170323, ENSG00000176171, ENSG00000116741	88	46	19277	14.2863	0.793677
GO TERM: BP	GO:0055086~nucleobase-containing small molecule metabolic process	GO:0055086	nucleobase-containing small molecule metabolic process	9	4.81283	0.0220921	ENSG00000212907, ENSG00000198695, ENSG00000138271, ENSG00000198763, ENSG00000198886, ENSG00000228253, ENSG00000198786, ENSG00000198712, ENSG00000198727	88	765	19277	2.57714	0.936035
GO TERM: BP	GO:0014070~response to organic cyclic compound	GO:0014070	response to organic cyclic compound	11	5.88235	0.0235678	ENSG00000107159, ENSG00000274750, ENSG00000276966, ENSG00000198695, ENSG00000172572, ENSG00000180176, ENSG00000198886, ENSG00000111863, ENSG00000131067, ENSG00000198727, ENSG00000070669	88	1081	19277	2.22907	0.950955
GO TERM: BP	GO:0006342~chromatin silencing	GO:0006342	chromatin silencing	4	2.13904	0.0236825	ENSG00000274750, ENSG00000276966, ENSG00000277075, ENSG00000276903	88	136	19277	6.44285	0.950955
GO TERM: BP	GO:0002686~negative regulation of leukocyte migration	GO:0002686	negative regulation of leukocyte migration	3	1.60428	0.0239081	ENSG00000137033, ENSG00000111863, ENSG00000151882	88	53	19277	12.3994	0.950955
GO TERM: BP	GO:0035094~response to nicotine	GO:0035094	response to nicotine	3	1.60428	0.0247559	ENSG00000198695, ENSG00000180176, ENSG00000198886	88	54	19277	12.1698	0.964984
GO TERM: BP	GO:0045814~negative regulation of gene expression, epigenetic	GO:0045814	negative regulation of gene expression, epigenetic	4	2.13904	0.0309705	ENSG00000274750, ENSG00000276966, ENSG00000277075, ENSG00000276903	88	151	19277	5.80283	1
GO TERM: BP	GO:0002826~negative regulation of T-helper 1 type immune response	GO:0002826	negative regulation of T-helper 1 type immune response	2	1.06952	0.0311723	ENSG00000137033, ENSG00000115602	88	7	19277	62.5877	1
GO TERM: BP	GO:0045471~response to ethanol	GO:0045471	response to ethanol	4	2.13904	0.0320216	ENSG00000180176, ENSG00000198886, ENSG00000198727, ENSG00000116741	88	153	19277	5.72698	1
GO TERM: BP	GO:0032787~monocarboxylic acid metabolic process	GO:0032787	monocarboxylic acid metabolic process	8	4.27807	0.0328138	ENSG00000180176, ENSG00000130208, ENSG00000111863, ENSG00000131067, ENSG00000152256, ENSG00000156239, ENSG00000112299, ENSG00000070669	88	675	19277	2.59623	1
GO TERM: BP	GO:0016070~RNA metabolic process	GO:0016070	RNA metabolic process	34	18.1818	0.0352444	ENSG00000107159, ENSG00000209482, ENSG00000277075, ENSG00000252906, ENSG00000188243, ENSG00000197928, ENSG00000276966, ENSG00000252835, ENSG00000124614, ENSG00000276903, ENSG00000183850, ENSG00000256771, ENSG00000206838, ENSG00000200913, ENSG00000105750, ENSG00000212443, ENSG00000196172, ENSG00000197124, ENSG00000199787, ENSG00000159885, ENSG00000170166, ENSG00000170323, ENSG00000196437, ENSG0000…	88	5487	19277	1.35738	1
GO TERM: MF	GO:0000978~RNA polymerase II core promoter proximal region sequence-specific DNA binding	GO:0000978	RNA polymerase II core promoter proximal region sequence-specific DNA binding	11	5.88235	0.035704	ENSG00000196172, ENSG00000197928, ENSG00000256229, ENSG00000180818, ENSG00000197124, ENSG00000183850, ENSG00000159885, ENSG00000170166, ENSG00000256771, ENSG00000196437, ENSG00000105750	74	1205	16739	2.06492	1
GO TERM: BP	GO:1901135~carbohydrate derivative metabolic process	GO:1901135	carbohydrate derivative metabolic process	12	6.41711	0.0390292	ENSG00000212907, ENSG00000198695, ENSG00000138271, ENSG00000180176, ENSG00000198763, ENSG00000213930, ENSG00000198886, ENSG00000228253, ENSG00000008438, ENSG00000198786, ENSG00000198712, ENSG00000198727	88	1344	19277	1.95586	1
GO TERM: BP	GO:0010958~regulation of amino acid import	GO:0010958	regulation of amino acid import	2	1.06952	0.0485517	ENSG00000147003, ENSG00000116741	88	11	19277	39.8285	1
GO TERM: BP	GO:0035542~regulation of SNARE complex assembly	GO:0035542	regulation of SNARE complex assembly	2	1.06952	0.0485517	ENSG00000100505, ENSG00000147003	88	11	19277	39.8285	1
GO TERM: BP	GO:0032754~positive regulation of interleukin-5 production	GO:0032754	positive regulation of interleukin-5 production	2	1.06952	0.0485517	ENSG00000137033, ENSG00000115602	88	11	19277	39.8285	1

## Sheet: KEGG
Category	Term	ID	Pathway	Count	%	PValue	Genes	List Total	Pop Hits	Pop Total	Fold Enrichment	Benjamini padj
KEGG_PATHWAY	hsa00190:Oxidative phosphorylation	hsa00190	Oxidative phosphorylation	8	4.27807	7.71444e-06	ENSG00000212907, ENSG00000198695, ENSG00000198763, ENSG00000198886, ENSG00000228253, ENSG00000198786, ENSG00000198712, ENSG00000198727	46	134	8112	10.5282	0.000640298
KEGG_PATHWAY	hsa05208:Chemical carcinogenesis - reactive oxygen species	hsa05208	Chemical carcinogenesis - reactive oxygen species	9	4.81283	2.578e-05	ENSG00000212907, ENSG00000198695, ENSG00000198763, ENSG00000198886, ENSG00000228253, ENSG00000198786, ENSG00000198712, ENSG00000133433, ENSG00000198727	46	223	8112	7.11718	0.00106987
KEGG_PATHWAY	hsa05012:Parkinson disease	hsa05012	Parkinson disease	9	4.81283	9.03591e-05	ENSG00000212907, ENSG00000198695, ENSG00000180176, ENSG00000198763, ENSG00000198886, ENSG00000228253, ENSG00000198786, ENSG00000198712, ENSG00000198727	46	266	8112	5.96666	0.00232743
KEGG_PATHWAY	hsa05415:Diabetic cardiomyopathy	hsa05415	Diabetic cardiomyopathy	8	4.27807	0.000112165	ENSG00000212907, ENSG00000198695, ENSG00000198763, ENSG00000198886, ENSG00000228253, ENSG00000198786, ENSG00000198712, ENSG00000198727	46	203	8112	6.94967	0.00232743
KEGG_PATHWAY	hsa04714:Thermogenesis	hsa04714	Thermogenesis	8	4.27807	0.000256658	ENSG00000212907, ENSG00000198695, ENSG00000198763, ENSG00000198886, ENSG00000228253, ENSG00000198786, ENSG00000198712, ENSG00000198727	46	232	8112	6.08096	0.00426052
KEGG_PATHWAY	hsa05020:Prion disease	hsa05020	Prion disease	8	4.27807	0.000685874	ENSG00000212907, ENSG00000198695, ENSG00000198763, ENSG00000198886, ENSG00000228253, ENSG00000198786, ENSG00000198712, ENSG00000198727	46	273	8112	5.1677	0.00948792
KEGG_PATHWAY	hsa05016:Huntington disease	hsa05016	Huntington disease	8	4.27807	0.00134069	ENSG00000212907, ENSG00000198695, ENSG00000198763, ENSG00000198886, ENSG00000228253, ENSG00000198786, ENSG00000198712, ENSG00000198727	46	306	8112	4.6104	0.0158967
KEGG_PATHWAY	hsa05034:Alcoholism	hsa05034	Alcoholism	6	3.20856	0.00356977	ENSG00000274750, ENSG00000276966, ENSG00000180176, ENSG00000277075, ENSG00000276903, ENSG00000273802	46	187	8112	5.65822	0.0331121
KEGG_PATHWAY	hsa05014:Amyotrophic lateral sclerosis	hsa05014	Amyotrophic lateral sclerosis	8	4.27807	0.00359047	ENSG00000212907, ENSG00000198695, ENSG00000198763, ENSG00000198886, ENSG00000228253, ENSG00000198786, ENSG00000198712, ENSG00000198727	46	364	8112	3.87578	0.0331121
KEGG_PATHWAY	hsa05010:Alzheimer disease	hsa05010	Alzheimer disease	8	4.27807	0.00481916	ENSG00000212907, ENSG00000198695, ENSG00000198763, ENSG00000198886, ENSG00000228253, ENSG00000198786, ENSG00000198712, ENSG00000198727	46	384	8112	3.67391	0.039999
KEGG_PATHWAY	hsa05322:Systemic lupus erythematosus	hsa05322	Systemic lupus erythematosus	5	2.6738	0.00661596	ENSG00000274750, ENSG00000276966, ENSG00000277075, ENSG00000276903, ENSG00000273802	46	136	8112	6.48338	0.0499205
KEGG_PATHWAY	hsa04723:Retrograde endocannabinoid signaling	hsa04723	Retrograde endocannabinoid signaling	5	2.6738	0.00887518	ENSG00000212907, ENSG00000198695, ENSG00000198763, ENSG00000198886, ENSG00000198786	46	148	8112	5.9577	0.0613867
KEGG_PATHWAY	hsa05022:Pathways of neurodegeneration - multiple diseases	hsa05022	Pathways of neurodegeneration - multiple diseases	8	4.27807	0.0149396	ENSG00000212907, ENSG00000198695, ENSG00000198763, ENSG00000198886, ENSG00000228253, ENSG00000198786, ENSG00000198712, ENSG00000198727	46	476	8112	2.96383	0.0895059
KEGG_PATHWAY	hsa01100:Metabolic pathways	hsa01100	Metabolic pathways	16	8.55615	0.0150974	ENSG00000107159, ENSG00000198695, ENSG00000180176, ENSG00000172572, ENSG00000198763, ENSG00000213930, ENSG00000198886, ENSG00000228253, ENSG00000198786, ENSG00000198712, ENSG00000133433, ENSG00000131067, ENSG00000198727, ENSG00000112299, ENSG00000212907, ENSG00000070669	46	1533	8112	1.84055	0.0895059
KEGG_PATHWAY	hsa05168:Herpes simplex virus 1 infection	hsa05168	Herpes simplex virus 1 infection	8	4.27807	0.0181859	ENSG00000197928, ENSG00000256229, ENSG00000197124, ENSG00000183850, ENSG00000159885, ENSG00000256771, ENSG00000196437, ENSG00000105750	46	495	8112	2.85007	0.100629
KEGG_PATHWAY	hsa04613:Neutrophil extracellular trap formation	hsa04613	Neutrophil extracellular trap formation	5	2.6738	0.0205681	ENSG00000274750, ENSG00000276966, ENSG00000277075, ENSG00000276903, ENSG00000273802	46	190	8112	4.64073	0.106697

## Sheet: Reactome
Category	Term	ID	Pathway	Count	%	PValue	Genes	List Total	Pop Hits	Pop Total	Fold Enrichment	Benjamini padj
REACTOME_PATHWAY	R-HSA-1428517~The citric acid (TCA) cycle and respiratory electron transport	R-HSA-1428517	The citric acid (TCA) cycle and respiratory electron transport	8	4.27807	2.79044e-05	ENSG00000198695, ENSG00000198763, ENSG00000198886, ENSG00000228253, ENSG00000198786, ENSG00000198712, ENSG00000152256, ENSG00000198727	54	178	10538	8.7707	0.00504984
REACTOME_PATHWAY	R-HSA-163200~Respiratory electron transport, ATP synthesis by chemiosmotic coupling, and heat production by uncoupling proteins.	R-HSA-163200	Respiratory electron transport, ATP synthesis by chemiosmotic coupling, and heat production by uncoupling proteins.	7	3.74332	3.92984e-05	ENSG00000198695, ENSG00000198763, ENSG00000198886, ENSG00000228253, ENSG00000198786, ENSG00000198712, ENSG00000198727	54	127	10538	10.7562	0.00504984
REACTOME_PATHWAY	R-HSA-611105~Respiratory electron transport	R-HSA-611105	Respiratory electron transport	6	3.20856	0.000160015	ENSG00000198695, ENSG00000198763, ENSG00000198886, ENSG00000198786, ENSG00000198712, ENSG00000198727	54	103	10538	11.3679	0.0137079
REACTOME_PATHWAY	R-HSA-3214815~HDACs deacetylate histones	R-HSA-3214815	HDACs deacetylate histones	5	2.6738	0.00124472	ENSG00000274750, ENSG00000276966, ENSG00000277075, ENSG00000276903, ENSG00000273802	54	94	10538	10.3802	0.0799731
REACTOME_PATHWAY	R-HSA-9610379~HCMV Late Events	R-HSA-9610379	HCMV Late Events	5	2.6738	0.00269436	ENSG00000274750, ENSG00000276966, ENSG00000277075, ENSG00000276903, ENSG00000273802	54	116	10538	8.41156	0.086455
REACTOME_PATHWAY	R-HSA-6799198~Complex I biogenesis	R-HSA-6799198	Complex I biogenesis	4	2.13904	0.00290212	ENSG00000198695, ENSG00000198763, ENSG00000198886, ENSG00000198786	54	57	10538	13.6946	0.086455
REACTOME_PATHWAY	R-HSA-5617472~Activation of anterior HOX genes in hindbrain development during early embryogenesis	R-HSA-5617472	Activation of anterior HOX genes in hindbrain development during early embryogenesis	5	2.6738	0.00313832	ENSG00000274750, ENSG00000276966, ENSG00000277075, ENSG00000273802, ENSG00000170166	54	121	10538	8.06397	0.086455
REACTOME_PATHWAY	R-HSA-5619507~Activation of HOX genes during differentiation	R-HSA-5619507	Activation of HOX genes during differentiation	5	2.6738	0.00313832	ENSG00000274750, ENSG00000276966, ENSG00000277075, ENSG00000273802, ENSG00000170166	54	121	10538	8.06397	0.086455
REACTOME_PATHWAY	R-HSA-73728~RNA Polymerase I Promoter Opening	R-HSA-73728	RNA Polymerase I Promoter Opening	4	2.13904	0.00385611	ENSG00000274750, ENSG00000276966, ENSG00000277075, ENSG00000273802	54	63	10538	12.3904	0.086455
REACTOME_PATHWAY	R-HSA-5334118~DNA methylation	R-HSA-5334118	DNA methylation	4	2.13904	0.00421169	ENSG00000274750, ENSG00000276966, ENSG00000277075, ENSG00000273802	54	65	10538	12.0091	0.086455
REACTOME_PATHWAY	R-HSA-5625886~Activated PKN1 stimulates transcription of AR (androgen receptor) regulated genes KLK2 and KLK3	R-HSA-5625886	Activated PKN1 stimulates transcription of AR (androgen receptor) regulated genes KLK2 and KLK3	4	2.13904	0.00458659	ENSG00000274750, ENSG00000276966, ENSG00000277075, ENSG00000273802	54	67	10538	11.6506	0.086455
REACTOME_PATHWAY	R-HSA-9609690~HCMV Early Events	R-HSA-9609690	HCMV Early Events	5	2.6738	0.00464241	ENSG00000274750, ENSG00000276966, ENSG00000277075, ENSG00000276903, ENSG00000273802	54	135	10538	7.22771	0.086455
REACTOME_PATHWAY	R-HSA-427359~SIRT1 negatively regulates rRNA expression	R-HSA-427359	SIRT1 negatively regulates rRNA expression	4	2.13904	0.00478139	ENSG00000274750, ENSG00000276966, ENSG00000277075, ENSG00000273802	54	68	10538	11.4793	0.086455
REACTOME_PATHWAY	R-HSA-68616~Assembly of the ORC complex at the origin of replication	R-HSA-68616	Assembly of the ORC complex at the origin of replication	4	2.13904	0.00498113	ENSG00000274750, ENSG00000276966, ENSG00000277075, ENSG00000273802	54	69	10538	11.3129	0.086455
REACTOME_PATHWAY	R-HSA-3214847~HATs acetylate histones	R-HSA-3214847	HATs acetylate histones	5	2.6738	0.00555048	ENSG00000274750, ENSG00000276966, ENSG00000277075, ENSG00000276903, ENSG00000273802	54	142	10538	6.87141	0.086455
REACTOME_PATHWAY	R-HSA-212300~PRC2 methylates histones and DNA	R-HSA-212300	PRC2 methylates histones and DNA	4	2.13904	0.00583023	ENSG00000274750, ENSG00000276966, ENSG00000277075, ENSG00000273802	54	73	10538	10.693	0.086455
REACTOME_PATHWAY	R-HSA-9710421~Defective pyroptosis	R-HSA-9710421	Defective pyroptosis	4	2.13904	0.00583023	ENSG00000274750, ENSG00000276966, ENSG00000277075, ENSG00000273802	54	73	10538	10.693	0.086455
REACTOME_PATHWAY	R-HSA-2299718~Condensation of Prophase Chromosomes	R-HSA-2299718	Condensation of Prophase Chromosomes	4	2.13904	0.00605521	ENSG00000274750, ENSG00000276966, ENSG00000277075, ENSG00000273802	54	74	10538	10.5485	0.086455
REACTOME_PATHWAY	R-HSA-427389~ERCC6 (CSB) and EHMT2 (G9a) positively regulate rRNA expression	R-HSA-427389	ERCC6 (CSB) and EHMT2 (G9a) positively regulate rRNA expression	4	2.13904	0.00652063	ENSG00000274750, ENSG00000276966, ENSG00000277075, ENSG00000273802	54	76	10538	10.271	0.0882001
REACTOME_PATHWAY	R-HSA-3214858~RMTs methylate histone arginines	R-HSA-3214858	RMTs methylate histone arginines	4	2.13904	0.00725786	ENSG00000274750, ENSG00000276966, ENSG00000277075, ENSG00000276903	54	79	10538	9.88092	0.0932635
REACTOME_PATHWAY	R-HSA-9609646~HCMV Infection	R-HSA-9609646	HCMV Infection	5	2.6738	0.00841384	ENSG00000274750, ENSG00000276966, ENSG00000277075, ENSG00000276903, ENSG00000273802	54	160	10538	6.09838	0.102969
REACTOME_PATHWAY	R-HSA-912446~Meiotic recombination	R-HSA-912446	Meiotic recombination	4	2.13904	0.00916433	ENSG00000274750, ENSG00000276966, ENSG00000277075, ENSG00000273802	54	86	10538	9.07666	0.10566
REACTOME_PATHWAY	R-HSA-9616222~Transcriptional regulation of granulopoiesis	R-HSA-9616222	Transcriptional regulation of granulopoiesis	4	2.13904	0.0103733	ENSG00000274750, ENSG00000276966, ENSG00000277075, ENSG00000273802	54	90	10538	8.67325	0.10566
REACTOME_PATHWAY	R-HSA-73772~RNA Polymerase I Promoter Escape	R-HSA-73772	RNA Polymerase I Promoter Escape	4	2.13904	0.0106893	ENSG00000274750, ENSG00000276966, ENSG00000277075, ENSG00000273802	54	91	10538	8.57794	0.10566
REACTOME_PATHWAY	R-HSA-5250924~B-WICH complex positively regulates rRNA expression	R-HSA-5250924	B-WICH complex positively regulates rRNA expression	4	2.13904	0.0106893	ENSG00000274750, ENSG00000276966, ENSG00000277075, ENSG00000273802	54	91	10538	8.57794	0.10566
REACTOME_PATHWAY	R-HSA-201722~Formation of the beta-catenin:TCF transactivating complex	R-HSA-201722	Formation of the beta-catenin:TCF transactivating complex	4	2.13904	0.0106893	ENSG00000274750, ENSG00000276966, ENSG00000277075, ENSG00000273802	54	91	10538	8.57794	0.10566
REACTOME_PATHWAY	R-HSA-1912408~Pre-NOTCH Transcription and Translation	R-HSA-1912408	Pre-NOTCH Transcription and Translation	4	2.13904	0.011338	ENSG00000274750, ENSG00000276966, ENSG00000277075, ENSG00000273802	54	93	10538	8.39347	0.107921
REACTOME_PATHWAY	R-HSA-5625740~RHO GTPases activate PKNs	R-HSA-5625740	RHO GTPases activate PKNs	4	2.13904	0.0120091	ENSG00000274750, ENSG00000276966, ENSG00000277075, ENSG00000273802	54	95	10538	8.21676	0.110227
REACTOME_PATHWAY	R-HSA-8936459~RUNX1 regulates genes involved in megakaryocyte differentiation and platelet function	R-HSA-8936459	RUNX1 regulates genes involved in megakaryocyte differentiation and platelet function	4	2.13904	0.0127027	ENSG00000274750, ENSG00000276966, ENSG00000277075, ENSG00000273802	54	97	10538	8.04735	0.111356
REACTOME_PATHWAY	R-HSA-9645723~Diseases of programmed cell death	R-HSA-9645723	Diseases of programmed cell death	4	2.13904	0.0149195	ENSG00000274750, ENSG00000276966, ENSG00000277075, ENSG00000273802	54	103	10538	7.57857	0.111356
REACTOME_PATHWAY	R-HSA-9014843~Interleukin-33 signaling	R-HSA-9014843	Interleukin-33 signaling	2	1.06952	0.0150139	ENSG00000137033, ENSG00000115602	54	3	10538	130.099	0.111356
REACTOME_PATHWAY	R-HSA-73857~RNA Polymerase II Transcription	R-HSA-73857	RNA Polymerase II Transcription	14	7.48663	0.0153394	ENSG00000196172, ENSG00000277075, ENSG00000197124, ENSG00000198712, ENSG00000159885, ENSG00000196437, ENSG00000274750, ENSG00000197928, ENSG00000276966, ENSG00000256229, ENSG00000273802, ENSG00000183850, ENSG00000128886, ENSG00000256771	54	1362	10538	2.00593	0.111356
REACTOME_PATHWAY	R-HSA-5578749~Transcriptional regulation by small RNAs	R-HSA-5578749	Transcriptional regulation by small RNAs	4	2.13904	0.016105	ENSG00000274750, ENSG00000276966, ENSG00000277075, ENSG00000273802	54	106	10538	7.36408	0.111356
REACTOME_PATHWAY	R-HSA-5250913~Positive epigenetic regulation of rRNA expression	R-HSA-5250913	Positive epigenetic regulation of rRNA expression	4	2.13904	0.016105	ENSG00000274750, ENSG00000276966, ENSG00000277075, ENSG00000273802	54	106	10538	7.36408	0.111356
REACTOME_PATHWAY	R-HSA-427413~NoRC negatively regulates rRNA expression	R-HSA-427413	NoRC negatively regulates rRNA expression	4	2.13904	0.0165117	ENSG00000274750, ENSG00000276966, ENSG00000277075, ENSG00000273802	54	107	10538	7.29526	0.111356
REACTOME_PATHWAY	R-HSA-9006931~Signaling by Nuclear Receptors	R-HSA-9006931	Signaling by Nuclear Receptors	6	3.20856	0.0167975	ENSG00000274750, ENSG00000276966, ENSG00000277075, ENSG00000130208, ENSG00000273802, ENSG00000152256	54	299	10538	3.91602	0.111356
REACTOME_PATHWAY	R-HSA-1912422~Pre-NOTCH Expression and Processing	R-HSA-1912422	Pre-NOTCH Expression and Processing	4	2.13904	0.0173423	ENSG00000274750, ENSG00000276966, ENSG00000277075, ENSG00000273802	54	109	10538	7.1614	0.111356
REACTOME_PATHWAY	R-HSA-5250941~Negative epigenetic regulation of rRNA expression	R-HSA-5250941	Negative epigenetic regulation of rRNA expression	4	2.13904	0.0177662	ENSG00000274750, ENSG00000276966, ENSG00000277075, ENSG00000273802	54	110	10538	7.0963	0.111356
REACTOME_PATHWAY	R-HSA-73854~RNA Polymerase I Promoter Clearance	R-HSA-73854	RNA Polymerase I Promoter Clearance	4	2.13904	0.0177662	ENSG00000274750, ENSG00000276966, ENSG00000277075, ENSG00000273802	54	110	10538	7.0963	0.111356
REACTOME_PATHWAY	R-HSA-212436~Generic Transcription Pathway	R-HSA-212436	Generic Transcription Pathway	13	6.95187	0.0180551	ENSG00000196172, ENSG00000277075, ENSG00000197124, ENSG00000198712, ENSG00000159885, ENSG00000196437, ENSG00000274750, ENSG00000197928, ENSG00000276966, ENSG00000256229, ENSG00000273802, ENSG00000183850, ENSG00000256771	54	1239	10538	2.04756	0.111356
REACTOME_PATHWAY	R-HSA-977225~Amyloid fiber formation	R-HSA-977225	Amyloid fiber formation	4	2.13904	0.018196	ENSG00000274750, ENSG00000276966, ENSG00000277075, ENSG00000273802	54	111	10538	7.03237	0.111356
REACTOME_PATHWAY	R-HSA-2559582~Senescence-Associated Secretory Phenotype (SASP)	R-HSA-2559582	Senescence-Associated Secretory Phenotype (SASP)	4	2.13904	0.0186315	ENSG00000274750, ENSG00000276966, ENSG00000277075, ENSG00000273802	54	112	10538	6.96958	0.111356
REACTOME_PATHWAY	R-HSA-73864~RNA Polymerase I Transcription	R-HSA-73864	RNA Polymerase I Transcription	4	2.13904	0.0186315	ENSG00000274750, ENSG00000276966, ENSG00000277075, ENSG00000273802	54	112	10538	6.96958	0.111356
REACTOME_PATHWAY	R-HSA-1500620~Meiosis	R-HSA-1500620	Meiosis	4	2.13904	0.0213664	ENSG00000274750, ENSG00000276966, ENSG00000277075, ENSG00000273802	54	118	10538	6.61519	0.124799
REACTOME_PATHWAY	R-HSA-2559580~Oxidative Stress Induced Senescence	R-HSA-2559580	Oxidative Stress Induced Senescence	4	2.13904	0.0248217	ENSG00000274750, ENSG00000276966, ENSG00000277075, ENSG00000273802	54	125	10538	6.24474	0.141759
REACTOME_PATHWAY	R-HSA-1430728~Metabolism	R-HSA-1430728	Metabolism	18	9.62567	0.027135	ENSG00000107159, ENSG00000198695, ENSG00000180176, ENSG00000198763, ENSG00000213930, ENSG00000198886, ENSG00000228253, ENSG00000198786, ENSG00000198712, ENSG00000133433, ENSG00000170323, ENSG00000131067, ENSG00000152256, ENSG00000198727, ENSG00000112299, ENSG00000156239, ENSG00000124614, ENSG00000070669	54	2121	10538	1.65614	0.147048
REACTOME_PATHWAY	R-HSA-68867~Assembly of the pre-replicative complex	R-HSA-68867	Assembly of the pre-replicative complex	4	2.13904	0.0274641	ENSG00000274750, ENSG00000276966, ENSG00000277075, ENSG00000273802	54	130	10538	6.00456	0.147048
REACTOME_PATHWAY	R-HSA-8939236~RUNX1 regulates transcription of genes involved in differentiation of HSCs	R-HSA-8939236	RUNX1 regulates transcription of genes involved in differentiation of HSCs	4	2.13904	0.0274641	ENSG00000274750, ENSG00000276966, ENSG00000277075, ENSG00000273802	54	130	10538	6.00456	0.147048
REACTOME_PATHWAY	R-HSA-171306~Packaging Of Telomere Ends	R-HSA-171306	Packaging Of Telomere Ends	3	1.60428	0.0280379	ENSG00000276966, ENSG00000277075, ENSG00000273802	54	52	10538	11.2585	0.147056
REACTOME_PATHWAY	R-HSA-211000~Gene Silencing by RNA	R-HSA-211000	Gene Silencing by RNA	4	2.13904	0.0319937	ENSG00000274750, ENSG00000276966, ENSG00000277075, ENSG00000273802	54	138	10538	5.65647	0.153019
REACTOME_PATHWAY	R-HSA-74160~Gene expression (Transcription)	R-HSA-74160	Gene expression (Transcription)	14	7.48663	0.0320698	ENSG00000196172, ENSG00000277075, ENSG00000197124, ENSG00000198712, ENSG00000159885, ENSG00000196437, ENSG00000274750, ENSG00000197928, ENSG00000276966, ENSG00000256229, ENSG00000273802, ENSG00000183850, ENSG00000128886, ENSG00000256771	54	1502	10538	1.81896	0.153019
REACTOME_PATHWAY	R-HSA-73927~Depurination	R-HSA-73927	Depurination	3	1.60428	0.0321519	ENSG00000276966, ENSG00000277075, ENSG00000273802	54	56	10538	10.4544	0.153019
REACTOME_PATHWAY	R-HSA-110331~Cleavage of the damaged purine	R-HSA-110331	Cleavage of the damaged purine	3	1.60428	0.0321519	ENSG00000276966, ENSG00000277075, ENSG00000273802	54	56	10538	10.4544	0.153019
REACTOME_PATHWAY	R-HSA-110330~Recognition and association of DNA glycosylase with site containing an affected purine	R-HSA-110330	Recognition and association of DNA glycosylase with site containing an affected purine	3	1.60428	0.0321519	ENSG00000276966, ENSG00000277075, ENSG00000273802	54	56	10538	10.4544	0.153019
REACTOME_PATHWAY	R-HSA-68875~Mitotic Prophase	R-HSA-68875	Mitotic Prophase	4	2.13904	0.0343969	ENSG00000274750, ENSG00000276966, ENSG00000277075, ENSG00000273802	54	142	10538	5.49713	0.16068
REACTOME_PATHWAY	R-HSA-1474165~Reproduction	R-HSA-1474165	Reproduction	4	2.13904	0.0350121	ENSG00000274750, ENSG00000276966, ENSG00000277075, ENSG00000273802	54	143	10538	5.45869	0.16068
REACTOME_PATHWAY	R-HSA-69002~DNA Replication Pre-Initiation	R-HSA-69002	DNA Replication Pre-Initiation	4	2.13904	0.0375299	ENSG00000274750, ENSG00000276966, ENSG00000277075, ENSG00000273802	54	147	10538	5.31015	0.161078
REACTOME_PATHWAY	R-HSA-73928~Depyrimidination	R-HSA-73928	Depyrimidination	3	1.60428	0.0376057	ENSG00000276966, ENSG00000277075, ENSG00000273802	54	61	10538	9.59745	0.161078
REACTOME_PATHWAY	R-HSA-110329~Cleavage of the damaged pyrimidine	R-HSA-110329	Cleavage of the damaged pyrimidine	3	1.60428	0.0376057	ENSG00000276966, ENSG00000277075, ENSG00000273802	54	61	10538	9.59745	0.161078
REACTOME_PATHWAY	R-HSA-110328~Recognition and association of DNA glycosylase with site containing an affected pyrimidine	R-HSA-110328	Recognition and association of DNA glycosylase with site containing an affected pyrimidine	3	1.60428	0.0376057	ENSG00000276966, ENSG00000277075, ENSG00000273802	54	61	10538	9.59745	0.161078
REACTOME_PATHWAY	R-HSA-212165~Epigenetic regulation of gene expression	R-HSA-212165	Epigenetic regulation of gene expression	4	2.13904	0.038823	ENSG00000274750, ENSG00000276966, ENSG00000277075, ENSG00000273802	54	149	10538	5.23888	0.162685
REACTOME_PATHWAY	R-HSA-9018519~Estrogen-dependent gene expression	R-HSA-9018519	Estrogen-dependent gene expression	4	2.13904	0.039478	ENSG00000274750, ENSG00000276966, ENSG00000277075, ENSG00000273802	54	150	10538	5.20395	0.162685
REACTOME_PATHWAY	R-HSA-73929~Base-Excision Repair, AP Site Formation	R-HSA-73929	Base-Excision Repair, AP Site Formation	3	1.60428	0.03988	ENSG00000276966, ENSG00000277075, ENSG00000273802	54	63	10538	9.29277	0.162685
REACTOME_PATHWAY	R-HSA-9670095~Inhibition of DNA recombination at telomere	R-HSA-9670095	Inhibition of DNA recombination at telomere	3	1.60428	0.0457869	ENSG00000276966, ENSG00000277075, ENSG00000273802	54	68	10538	8.60948	0.183863
REACTOME_PATHWAY	R-HSA-3247509~Chromatin modifying enzymes	R-HSA-3247509	Chromatin modifying enzymes	5	2.6738	0.0484836	ENSG00000274750, ENSG00000276966, ENSG00000277075, ENSG00000276903, ENSG00000273802	54	274	10538	3.5611	0.188792
REACTOME_PATHWAY	R-HSA-4839726~Chromatin organization	R-HSA-4839726	Chromatin organization	5	2.6738	0.0484836	ENSG00000274750, ENSG00000276966, ENSG00000277075, ENSG00000276903, ENSG00000273802	54	274	10538	3.5611	0.188792
